# Supplementary material for: Dilated cardiomyopathy mutation E525K in human beta-cardiac myosin stabilizes the interacting-heads motif and super-relaxed state of myosin
Source: eLife journal article supplement (doi:10.7554/elife.77415), 2022-11-08
Supplement: fig2-data1 [file Source Data Figure 2.xlsx]

## Sheet: 15HP & S1
WT 15HP	N=5			Parameter	WT	E525K	P-Value	WT	P-Value
[Actin]	Avg	STDEV	SE		M2β 15HPZ.GFP	M2β 15HPZ.GFP	E525K vs WT 15HPZ.GFP	M2β S1	M2β S1 vs WT 15HPZ.GFP
0	0.0191001	0.0185649	0.00830247	v0 (s-1)	0.02±0.01	0.01±0.01	0.409	0.02±0.02	1
5	0.0517918	0.0217982		kcat (s-1)	1.1±0.49	0.41±0.09	0.3338	7.8±0.7	0.0001
10	0.0926814	0.0365854		KATPase (µM)	99.9±64.5	53.3±20.8	0.6128	52.2±8.6	0.4396
20	0.17435	0.0427218		Average sliding velocity (nm/s)	853±54	852±58	0.9905	1591±16	0.0002
40	0.409916	0.0627635		Percent stuck filaments	27.8±9.5	34.8±5.4	0.5566	≤5	N.D.
60	0.394075	0.105321
E525K 15HP	N=3
[Actin]	Avg	STDEV	SE
0	0.00875256	0.00869415	0.00501957	Parameter	WT	E525K	P-Value
5	0.0350343	0.0146204			M2β S1	M2β S1	E525K vs WT M2β S1
10	0.0741545	0.0171033		v0 (s-1)	0.02±0.01	0.03±0.01	0.4374
20	0.136794	0.0227404		kcat (s-1)	7.8±0.7, N=6	10.6±0.3	0.0314
40	0.165371	0.0408877		KATPase (µM)	52.2±8.6, N=6	1.8±0.4	0.005
60	0.234474	0.0227706		Average sliding velocity (nm/s)	1591±16	N.D.
				Percent stuck filaments	≤5	N.D.
WT S1	N=6
[Actin]	Avg	STDEV	SE
0	0.0153419	0.0194453	0.00793849
5	0.475993	0.094352
10	0.973471	0.139285
20	1.76125	0.259043
40	2.82795	0.339462
60	3.66197	0.438652
E525K S1 S1	N=3
[Actin]	Avg	STDEV	SE
0	0.025643	0.0122525	0.00707399
5	7.32995	0.744804
10	9.70648	0.599094
20	10.4868	0.198652
40	9.89854	0.635706
60	9.87211	0.762381

## Sheet: IVM Raw Data
WT	Exp 1 - 0.5uM	50.4	83.2794	Exp 2 - 0.5uM	182.392	Exp 3 - 0.5uM	85.2341	90.2087		E525K	Exp 1 - 0.5uM	146.898	Exp 2 - 0.5uM	139.261	Exp 3 - 0.4uM	111.333	110.628
		54.6	83.6894		198.879		100.223	104.541				149.953		148.904		121.652	152.877
		73.866	86.0647		232.253		102.712	135.56				157.519		151.925		124.32	160.247
		79.231	88.2264		265.035		116.744	154.96				166.118		155.933		136.21	162.889
		82.5588	90.7314		285.014		117.373	165.981				170.53		165.133		139.857	179.782
		83.3995	93.0663		292.596		118.667	175.968				183.276		184.942		141.804	186.967
		86.0382	96.0178		298.575		133.914	178.263				187.085		185.001		143.058	193.995
		87.0814	98.0432		298.712		134.58	191.099				187.911		189.486		145.027	197.916
		89.9624	98.0432		300.925		137.294	192.059				190.185		190.435		145.027	202.296
		90.7279	103.891		315.228		137.76	193.7				190.278		191.617		147.94	206.616
		91.8125	104.449		318.447		139.391	197.444				191.265		192.693		153.595	206.887
		93.2163	109.333		320.414		139.591	201.606				193.128		199.809		157.469	208.995
		93.7279	109.349		325.274		140.049	206.873				197.288		200.62		160.36	209.359
		94.0072	110.799		327.671		140.644	207.451				198.211		201.404		162.666	212.161
		94.1219	113.698		331.278		140.862	208.341				199.288		206.352		164.673	212.298
		94.8701	114.237		336.467		142.001	210.297				207.973		208.49		165.692	216.42
		96.4706	115.987		338.44		147.151	211.614				208.915		211.337		165.805	222.062
		100.471	116.01		356.35		154.304	211.768				213.518		227.511		166.205	224.656
		101.239	116.324		356.423		154.77	220.287				213.621		228.919		167.006	239.585
		106.709	120.112		362.503		155.89	223.377				214.964		229.085		168.139	239.725
		109.698	120.783		362.996		161.548	224.301				220.113		230.815		173.248	243.971
		111.583	121.589		363.437		162.112	225.189				223.325		230.823		175.884	245.221
		111.764	124.385		366.189		162.725	226.108				223.793		238.589		177.043	246.054
		114.519	128.917		367.496		163.187	227.731				224.482		240.053		178.291	249.854
		114.854	129.078		369.604		164.218	227.832				225.609		240.763		180.096	250.275
		114.899	130.324		369.866		164.736	229.308				226.106		243.386		181.399	252.913
		114.963	135.789		373.225		167.045	230.298				227.941		245.912		184.308	254.82
		115.221	136.264		373.601		169.359	232.433				228.895		248.639		184.55	255.591
		115.546	140.318		377.514		170.082	234.524				229.093		248.934		185.735	256.454
		116.243	148.456		379.587		170.185	239.949				229.961		250.753		185.977	257.036
		116.998	149.741		380.993		171.218	243.479				230.533		253.532		188.005	257.495
		117.078	151.423		381.731		172.254	243.659				232.282		255.865		188.363	258.593
		117.191	155.106		386.808		172.495	244.038				233.092		256.155		188.516	259.245
		117.448	155.371		396.489		172.764	246.362				234.905		256.715		188.718	259.294
		118.471	155.782		397.081		172.862	247.248				234.968		257.728		189.025	261.333
		120.075	157.016		398.806		173.295	247.481				237.085		263.545		189.64	261.505
		120.438	157.133		398.836		173.963	250.681				237.555		268.012		191.357	265.046
		129.19	157.143		401.057		174.456	251.946				237.555		269.126		192.086	268.392
		129.438	158.423		402.269		175.264	252.318				237.684		269.641		192.091	268.667
		129.713	159.912		402.888		175.3	258.35				239.091		272.57		194.567	268.935
		129.727	160.619		403.553		176.085	258.407				239.617		277.895		195.111	270.354
		130.243	160.781		404.249		177.737	261.147				240.421		282.692		198.127	270.401
		130.515	162.807		406.039		179.417	261.207				240.615		282.965		198.199	270.933
		130.805	164.981		406.101		180.091	262.901				243.188		283.318		198.277	271.513
		130.838	166.333		406.398		183.177	267.387				243.582		287.377		199.417	271.719
		131.775	166.57		409.862		184.54	267.469				244.692		289.687		199.51	271.926
		132.48	166.72		410.698		184.878	272.705				245.121		292.081		199.571	273.025
		132.706	168.523		414.548		186.644	278.481				248.176		294.831		200.046	277.243
		133.784	171.387		415.709		186.644	280.675				248.479		296		200.611	277.565
		136.048	172.089		416.918		187.249	281.283				249.037		302.766		200.924	277.829
		136.532	172.348		417.469		187.925	282.153				249.813		304.092		201.188	278.953
		136.698	173.751		418.762		188.319	282.599				253.178		304.63		202.625	279.151
		136.743	174.074		421.052		189.745	283.677				255.143		306.631		203.988	279.361
		137.184	174.296		421.08		193.225	284.156				255.161		313.584		204.147	280.27
		137.243	174.499		426.322		194.812	285.774				255.706		315.786		205.035	281.183
		138.334	174.824		428.038		195.031	286.023				259.306		317.22		205.663	281.308
		140.081	176.968		428.109		196.803	286.309				259.758		319.408		206.516	283.593
		140.696	177.691		428.852		197.235	286.816				265.961		322.375		207.05	283.717
		140.878	177.761		434.287		199.154	289.312				266.442		322.888		208.104	287.826
		141.803	178.094		435.141		199.566	291.038				269.015		324.448		210.691	288.907
		143.048	178.104		435.742		199.864	291.153				269.914		331.318		211.995	290.504
		143.048	178.95		438.177		200.657	292.096				270.412		332.994		213.935	293.621
		143.103	180.112		438.99		200.999	293.52				270.536		335.602		214.633	296.515
		143.151	180.358		441.479		201.767	294.073				272.239		336.11		214.735	298.982
		144.243	181.553		441.678		202.048	297.409				272.323		336.553		216.649	301.66
		145.158	182.436		441.801		202.651	300.363				272.471		339.918		217.054	304.157
		145.406	182.46		446.11		202.659	300.408				272.838		340.377		217.565	307.326
		145.618	182.837		447.273		202.986	303.011				273.57		343.185		220.288	307.48
		146.227	183.197		451.925		203.583	304.115				273.585		344.585		220.717	308.31
		146.515	183.675		452.703		203.779	306.328				276.326		345.757		221.213	308.32
		147.184	188.114		453.326		204.135	309.868				276.409		346.291		222.6	309.478
		147.997	188.671		455.727		204.135	310.331				278.274		346.405		225.226	309.542
		148.5	189.556		456.389		204.894	312.982				278.536		348.716		225.709	310.314
		148.62	191.204		462.191		205.183	316.467				279.706		353.121		226.216	312.768
		148.904	191.601		463.464		206.834	317.692				279.869		353.263		226.218	315.251
		149.912	192.122		463.507		206.966	317.943				280.037		354.456		227.185	315.281
		150.714	192.666		463.52		207.169	318.033				281.191		354.921		227.882	316.786
		150.805	192.886		464.907		210.028	318.176				282.905		354.969		228.914	317.153
		151.349	194.603		465.188		210.087	319.311				283.025		357.652		229.785	320.291
		151.598	195.737		465.338		210.44	320.284				284.988		358.145		231.528	321.162
		151.675	195.868		466.651		210.511	321.34				285.628		359.201		231.843	321.605
		152.06	196.17		473.449		210.998	321.59				286.573		360.158		232.601	325.731
		152.623	196.386		475.216		212.911	322.074				286.903		360.738		233.134	327.051
		152.68	196.589		479.189		214.051	322.496				287.432		361.006		233.513	327.63
		153.935	196.927		482.183		214.336	322.56				287.599		361.351		233.618	328.162
		154	199.57		484.326		214.385	323.685				289.822		367.476		235.864	330.37
		154.295	199.717		487.103		214.743	324.229				289.953		369.798		236.442	331.058
		154.709	199.806		487.808		215.523	324.83				290.522		370.169		236.883	334.852
		154.767	200.37		489.016		216.089	324.867				291.691		374.377		237.157	341.581
		155.276	200.387		489.889		216.201	325.228				291.971		382.785		238.091	342.382
		156.489	201.286		490.736		216.374	327.792				292.238		384.793		238.197	342.74
		157.426	201.335		491.151		217.231	329.918				294.642		387.753		238.315	343.985
		157.951	202.185		492.635		218.468	330.594				295.03		388.016		240.102	348.455
		158.139	202.671		492.866		219.229	331.485				295.311		388.795		240.896	351.481
		158.662	202.691		493.015		219.491	331.739				296.565		390.402		241.421	354.064
		158.939	204.015		493.609		220.013	331.857				297.097		391.17		241.477	355.073
		159.146	204.066		495.724		220.206	333.294				300.398		391.738		241.55	355.175
		159.458	204.96		497.555		220.219	334.045				303.765		391.973		241.716	355.716
		159.762	206.858		498.531		220.372	334.728				304.313		393.29		244.386	357.76
		159.896	206.96		498.823		221.417	334.912				305.347		394.645		245.011	359.175
		160.225	207.254		499.095		221.671	337.194				307.794		396.689		246.839	360.322
		160.412	209.178		499.109		221.96	337.588				308.643		397.76		247.291	361.819
		161	209.19		499.569		222.815	338.778				308.693		399.422		248.196	363.27
		161.402	209.33		504.408		223.459	340.566				310.441		400.67		248.201	364.176
		161.493	209.481		504.426		224.157	344.032				310.547		400.776		248.494	364.489
		162.184	210.21		504.651		224.244	344.27				313.56		400.903		249.906	365.484
		162.345	210.882		505.35		224.674	344.61				313.602		404.812		251.074	368.543
		162.403	211.33		505.618		225.555	344.94				314.333		406.2		251.684	369.898
		162.43	211.459		508.732		226.455	345.869				315.44		406.571		251.961	370.168
		162.71	212.45		511.394		226.803	346.021				317.126		407.886		251.989	370.192
		163.12	212.72		514.457		227.196	350.242				317.597		410.262		252.903	371.789
		163.237	212.879		515.368		227.373	350.386				317.772		414.256		253.46	372.099
		163.485	213.011		515.746		228.557	350.525				318.4		417.979		253.71	372.962
		166.447	213.788		516.207		228.736	350.576				320.345		419.643		254.304	373.76
		167.466	214.269		520.102		228.818	351.246				320.574		419.742		260.972	374.937
		167.688	214.472		521.672		229.527	355.974				322.987		421.678		261.837	375.36
		168.218	215.329		525.153		229.585	356.232				324.006		423.475		263.001	378.84
		168.247	215.382		526.997		229.829	356.25				325.18		424.233		264.837	380.233
		169.944	215.469		527.474		229.832	359.304				326.77		425.877		267.554	381.952
		170.485	216.19		527.498		230.295	359.499				329.83		426.889		268.432	382.545
		170.542	216.928		527.732		230.944	360.701				330.244		427.152		268.471	383.02
		172.247	217.53		529.594		232.124	362.423				330.384		429.468		271.22	384.189
		172.311	217.752		530.593		232.33	363.289				333.091		431.91		272.373	384.3
		172.382	217.841		531.592		232.527	364.213				333.961		432.213		273.707	384.437
		172.966	217.881		533.721		232.764	365.385				334.58		434.296		273.817	388.603
		173.369	218.016		533.868		232.805	365.868				334.789		434.558		273.861	388.87
		173.669	218.255		536.866		233.122	366.196				337.775		435.219		274.373	389.225
		173.766	218.405		537.167		233.191	369.02				340.076		436.068		275.065	392.644
		174.144	220.113		537.964		233.367	369.05				344.883		436.245		277.116	392.665
		174.176	221.035		538.858		233.422	370.058				345.445		437.309		277.552	393.234
		174.294	221.801		539.064		233.725	371.346				345.675		440.745		279.146	393.617
		174.669	222.524		542.305		234.071	371.537				346.023		442.826		279.553	394.369
		174.816	223.115		542.749		234.398	372.029				349.077		444.968		279.764	396.109
		176.155	223.347		543.333		234.398	372.238				350.455		446.541		279.815	398.152
		176.556	224.462		545.012		234.63	372.874				350.761		447.617		280.429	399.94
		177.136	224.998		545.238		234.931	372.996				353.729		451.509		282.108	400.172
		177.942	225.314		547.321		235.456	373.191				354.35		451.795		283.146	401.916
		179.198	225.552		548.626		235.685	373.498				355.051		453.022		283.228	402.103
		179.21	226.019		549.014		236.137	374.249				356.116		453.767		283.967	404.323
		180.057	226.217		551.548		236.158	374.604				356.662		453.897		284.161	404.654
		181.243	226.43		551.854		237.032	374.964				359.243		457.022		284.217	404.711
		182.726	226.842		552.51		237.148	375.022				360.704		457.256		285.371	409.058
		183.3	227.238		553.566		237.399	375.988				361.702		458.184		285.889	410.899
		184.065	228.363		553.597		238.172	376.84				362.97		459.003		285.904	413.087
		184.207	228.788		555.357		238.182	377.105				363.247		460.272		286.264	413.367
		184.301	229.272		555.476		238.589	378.071				363.501		461.037		288.505	413.759
		184.485	229.511		556.049		238.638	378.307				363.99		464.853		289.54	414.206
		185.412	229.962		556.074		239.407	379.269				366.573		465.582		290.181	416.023
		186.184	230.38		556.887		239.467	379.518				367.4		466.892		290.194	418.972
		186.278	230.874		557.472		239.993	381.043				369.293		467.789		290.251	420.602
		186.844	232.21		557.866		240.396	381.131				370.644		467.872		290.551	420.852
		186.983	232.478		557.945		240.548	381.537				371.296		469.074		290.799	424.329
		187.732	233.45		561.117		241.228	381.577				379.382		469.899		291.101	425.003
		187.997	234.526		561.125		241.338	381.621				381.362		472.002		292.223	425.113
		188.145	234.676		561.65		241.354	382.758				381.786		476.541		292.286	425.246
		188.33	234.99		562.973		242.016	384.883				383.044		476.944		293.268	426.34
		188.415	235.069		563.227		242.666	385.35				383.82		476.951		293.411	426.495
		188.567	235.221		563.483		244.305	385.475				384.119		477.841		293.811	426.556
		189.763	235.644		566.502		244.417	385.513				384.132		480.34		294.105	426.679
		189.88	237.48		566.652		244.453	387.114				384.331		480.493		294.305	427.243
		190.666	238.75		567.602		244.488	387.186				384.356		480.585		294.782	427.644
		191.85	238.918		568.545		244.824	387.254				384.967		480.667		295.186	428.736
		192.031	239.066		569.116		244.932	388.485				387.001		480.892		295.615	430.27
		192.219	239.096		569.435		245.517	390.53				388.003		483.052		296.478	434.293
		192.495	241.234		571.054		246.33	391.754				390.366		483.974		296.632	434.559
		192.967	241.676		571.79		247.252	391.955				394.817		486.213		296.817	435.112
		193.056	243.401		572.155		247.287	392.269				398.537		486.595		297.08	435.457
		193.065	243.562		572.94		247.647	392.604				399.304		487.298		297.762	437.828
		194.159	243.563		574.098		247.748	393.087				399.529		490.265		298.93	438.173
		194.247	243.858		574.361		247.835	394.47				400.673		490.443		299.442	439.923
		195.612	245.822		575.094		248.508	394.957				400.88		490.977		301.757	443.12
		196.325	247.154		576.256		250.133	395.794				401.272		492.245		302.157	444.353
		196.94	247.745		576.837		250.135	396.13				402.184		492.844		302.516	446.451
		197.266	249.636		579.057		250.251	396.279				403.121		494.187		303.171	448.251
		197.462	249.795		580.743		250.258	396.756				403.153		494.641		304.469	449.648
		197.758	250.298		580.907		250.368	397.273				403.485		494.778		305.547	450.094
		198.313	251.426		582.891		251.306	397.851				403.896		494.852		305.61	450.738
		198.751	251.868		583.552		251.722	398.239				403.959		495.52		306.472	450.805
		198.889	252.258		583.99		252.287	398.534				405.584		495.538		307.288	451.95
		198.933	252.506		584.108		252.44	398.62				405.614		497.164		307.552	452.763
		199.076	253.007		585.193		252.534	399.809				405.788		498.914		308.737	457.237
		199.525	253.236		585.894		252.71	400.241				406.174		505.935		309.159	458.609
		199.879	254.019		587.739		253.066	400.279				407.13		509.884		309.178	459.099
		199.941	254.487		588.191		253.285	400.322				407.691		511.806		309.682	459.453
		200.209	254.569		588.874		253.536	400.653				411.261		514.182		310.086	459.644
		202.026	254.643		589.61		253.782	401.01				411.897		519.205		310.466	459.855
		202.471	254.839		590.436		253.848	401.918				412.578		520.47		311.005	462.373
		202.875	255.669		592.397		254.281	403.129				413.284		521.586		312.116	462.396
		202.967	255.689		593.779		254.331	404.013				414.148		523.659		313.01	465.675
		203.519	256.27		594.234		255.945	405.058				417.739		523.779		314.38	465.785
		203.839	256.823		597.087		255.983	406.066				418.097		524.169		315.431	467.642
		205.141	256.991		598.407		256.344	407.852				419.698		524.226		316.006	469.792
		205.167	257.443		598.545		256.74	407.943				419.893		524.255		316.021	470.749
		205.491	258.391		598.546		257.183	408.51				422.476		524.584		319.063	471.183
		205.597	258.588		598.796		257.811	408.571				422.694		526.267		319.502	471.846
		206.069	259.039		598.939		257.89	409.664				422.767		526.637		319.616	472.125
		206.524	259.197		599.162		258.326	410.341				423.613		528.267		320.828	473.544
		206.766	259.261		599.372		258.474	410.367				425.311		528.678		322.332	473.824
		207.231	259.465		599.632		258.526	410.583				426.779		528.701		323.598	473.909
		207.702	259.486		600.954		258.839	411.077				427.706		529.149		323.945	476.995
		207.817	259.666		601.403		258.974	411.392				427.747		530.458		326.103	478.854
		207.893	260.321		601.589		259.014	412.172				428.108		530.775		326.735	478.994
		208.024	260.409		602.305		259.119	412.233				428.587		531.197		327.034	479.324
		208.1	260.742		602.319		259.489	415.455				429.298		531.283		328.188	483.725
		209.261	260.879		603.596		259.53	415.707				430.615		531.414		328.882	483.919
		209.495	261.227		605.01		259.649	415.879				432.476		531.833		328.962	484.713
		209.724	261.469		605.764		259.786	416.836				433.984		531.983		331.666	487.655
		209.74	261.824		605.978		260.166	417.177				436.857		532.161		331.692	488.667
		209.749	262.245		607.05		260.259	417.225				437.689		535.056		332.409	489.377
		211.097	262.492		607.496		261.131	417.49				438.414		535.754		333.499	489.635
		211.53	262.496		608.096		261.465	417.831				438.653		537.754		336.117	490.384
		212.418	262.615		608.213		261.847	420.595				442.931		537.847		336.649	491.057
		213.159	262.668		608.712		262.159	421.196				443.123		539.219		337.394	493.123
		213.351	262.676		608.824		262.219	421.489				444.852		539.613		338.058	494.094
		213.717	263.237		608.824		262.978	421.54				445.879		539.79		338.282	494.392
		214.026	264.822		609.377		263.127	422.012				446.955		540.769		338.484	494.946
		214.507	265.168		609.503		263.219	422.817				447.53		541.105		338.991	497.25
		215.017	265.367		609.537		263.551	422.864				449.72		541.706		341.21	499.973
		215.196	268.199		610.86		263.789	423.193				451.178		542.362		342.662	501.45
		215.326	268.637		611.639		264.26	423.434				452.058		542.706		343.063	502.539
		216.123	270.331		613.151		264.349	423.501				453.322		543.495		343.292	502.648
		216.27	271.058		613.947		264.589	424.659				455.301		543.556		344.572	504.702
		216.438	271.122		613.996		264.791	425.273				455.302		545.848		344.826	504.902
		216.724	271.685		614.942		266.016	425.74				456.82		546.392		347.008	507.242
		216.809	271.722		615.725		266.317	427.072				457.479		547.603		347.155	507.66
		216.849	271.856		615.866		266.357	427.896				457.515		548.988		348.372	507.806
		217.02	273.02		617.461		266.561	427.908				459.669		549.16		349.216	508.093
		217.228	273.367		618.179		266.748	428.857				460.156		551.057		349.832	508.666
		217.508	274.214		618.807		266.819	428.901				460.389		551.443		351.478	508.95
		217.837	274.87		620.007		267.761	429.595				461.594		555.332		352.386	509.188
		218.018	275.113		620.051		268.117	430.442				461.966		557.117		355.123	510.182
		218.435	276.364		620.307		268.341	432.351				462.326		557.558		356.589	510.394
		218.464	276.516		621.229		268.554	432.479				462.809		557.677		358.304	511.407
		218.879	276.832		621.578		268.868	432.938				464.179		560.211		359.231	512.559
		219.22	276.894		622.176		270.136	433.371				466.661		562.041		359.239	512.567
		220.294	277.276		622.957		270.23	433.389				466.757		562.974		360.737	513.434
		220.311	277.901		623.568		270.262	433.562				467.248		563.65		363.644	513.712
		220.503	278.168		626.324		270.593	434.178				467.293		563.947		364.318	514.85
		220.91	278.375		627.964		270.667	434.187				468.286		564.184		364.343	514.92
		221.13	278.652		627.981		270.758	434.405				471.059		564.37		365.183	515.795
		221.533	278.717		628.782		270.785	434.406				471.433		565.031		365.291	516.528
		221.542	280.246		629.201		271.735	434.897				472.318		566.7		365.428	516.614
		221.731	280.268		630.698		271.948	435.117				473.689		566.743		365.454	516.734
		221.757	280.624		631.211		272.318	435.426				473.889		566.768		367.7	517.351
		222.008	281.708		631.672		273.066	435.708				474.705		567.803		370.733	518.984
		222.186	281.93		631.717		273.786	435.81				475.059		567.81		371.057	522.691
		222.336	282.504		631.783		274.268	435.955				475.086		568.176		371.902	523.674
		222.766	283.347		632.132		274.426	436.89				475.881		569.504		373.027	525.654
		224.033	284.036		634.341		275.546	437.046				476.157		569.908		376.077	525.696
		224.682	284.195		634.341		275.56	437.508				476.395		570.6		376.23	526.053
		224.998	284.41		634.967		275.648	438.123				477.649		570.748		376.294	526.786
		225.408	285.158		635.976		275.784	438.535				478.798		571.176		377.353	526.878
		225.928	285.166		636.05		276.362	438.701				479.1		571.391		378.211	527.176
		225.995	285.458		636.514		276.371	439.612				481.679		573.644		378.579	528.132
		226.444	286.472		637.696		276.852	439.863				483.203		574.601		378.717	529.113
		227.627	287.129		638.041		278.01	439.947				483.59		574.793		380.579	529.245
		227.826	287.27		638.167		278.179	441.274				484.063		575.273		381.874	529.314
		227.954	287.938		638.691		278.61	441.633				485.217		575.308		382.579	529.531
		228.022	290.18		639.278		279.097	442.446				486.06		575.324		383.245	529.538
		228.443	292.404		640.066		279.114	442.809				486.305		575.817		383.34	530.726
		228.912	293.583		640.197		279.586	443.029				487.728		576.235		384.657	531.313
		229.015	293.69		640.761		279.755	444.752				488.9		577.653		385.763	534.182
		229.36	294.05		640.879		280.976	444.948				489.5		577.733		385.898	535.615
		230.382	295.666		641.091		281.138	446.627				489.524		578.077		387.236	536.944
		230.762	295.752		642.209		281.208	448.202				489.643		578.722		388.188	537.28
		230.836	296.153		643.177		281.314	448.853				489.809		580.61		389.091	537.336
		231.687	296.738		643.457		281.442	449.495				490.301		581.025		389.215	537.599
		231.7	296.945		644.139		281.611	450.484				490.996		584.448		390.971	537.68
		231.78	297.02		646.321		281.694	450.935				492.515		584.923		390.976	540.169
		232.262	297.205		647.783		282.681	451.672				492.804		585.004		391.735	540.778
		232.465	297.35		648.334		283.278	452.509				496.503		585.191		393.272	541.084
		233.261	298.342		648.364		284.756	452.522				497.326		585.603		393.98	541.177
		233.623	298.524		648.453		284.877	452.927				498.199		586.134		394.323	541.957
		233.694	299.428		649.649		286.046	453.981				498.465		586.318		395.146	542.353
		233.706	299.811		651.679		286.142	454.31				499.649		586.562		395.469	550.302
		234.225	301.023		652.342		286.156	454.588				499.703		587.311		395.883	551.45
		235.005	301.492		652.658		286.625	455.771				501.176		587.893		397.058	552.227
		235.076	301.634		654.819		286.634	456.44				502.807		589.373		399.009	553.233
		235.087	302.837		655.743		286.719	457.105				502.937		590.379		399.375	553.421
		235.273	303.102		655.831		287.511	457.701				503.532		591.074		400.398	554.143
		235.282	304.117		656.723		287.578	458.277				505.275		591.277		401.017	556.241
		235.497	304.446		657.357		287.899	458.637				506.079		593.63		401.407	556.728
		236.016	304.674		658.002		288.895	458.826				506.477		594.493		402.525	558.982
		236.121	305.736		658.63		289.066	458.994				506.491		594.736		402.666	559.224
		236.707	306.874		658.711		289.475	459.212				507.058		594.994		403.092	560.092
		236.813	307.058		661.672		289.764	459.576				507.295		596.313		403.132	562.067
		237.708	307.064		661.83		289.781	459.739				508.631		597.566		404.991	562.141
		238.153	307.065		664.69		289.965	460.258				511.041		597.752		405.917	562.976
		238.588	307.186		665.053		290.586	461.338				511.109		598.028		406.057	563.842
		238.818	307.324		666.539		291.702	461.39				511.122		598.349		406.135	564.768
		238.896	307.847		666.671		291.718	461.516				512.139		598.364		406.981	568.725
		239.18	307.912		667.79		292.706	462.761				512.419		598.772		407.303	569.307
		240.89	309.033		668.531		292.963	462.807				513.299		599.309		408.193	570.102
		241.199	310.381		669.16		293.255	462.897				513.783		600.735		409.038	571.08
		241.372	310.475		669.91		294.125	463.234				514.525		601.884		409.115	573.406
		241.716	311.18		672.248		294.465	463.459				514.872		602.011		409.231	575.173
		242.067	311.335		672.294		294.563	463.747				516.484		603.248		409.477	576.456
		243	313.236		672.592		295.099	463.777				516.486		604.503		410.036	578.079
		243.143	313.489		673.103		295.346	464.18				518.798		604.517		410.127	578.914
		243.186	313.55		673.159		295.979	464.637				518.831		605.424		410.602	578.976
		243.259	314.859		674.047		296.735	464.963				519.146		606.246		412.904	579.401
		243.407	315.64		675.783		297.056	465.058				521.362		606.499		413.044	580.007
		243.756	315.898		676.897		300.076	465.07				522.029		607.091		413.391	580.363
		244.12	316.054		677.081		300.328	465.381				523.143		608.641		415.941	580.457
		244.313	317.423		677.843		300.453	465.422				523.488		608.672		417.753	580.579
		245.677	317.816		678.23		300.48	465.504				524.869		609.621		417.785	580.965
		245.824	317.909		678.312		300.727	465.513				525.373		610.458		418.218	581.647
		246.535	317.983		678.8		300.757	465.807				525.822		612.499		418.476	583.246
		246.809	318.317		679.128		300.873	465.844				526.204		612.964		420.063	583.615
		246.924	318.321		680.167		301.621	465.933				526.289		613.08		420.827	585.093
		247.287	318.323		680.176		301.856	466.044				526.849		613.392		421.028	585.77
		248.346	319.336		680.347		301.991	466.058				527.038		613.445		421.507	586.141
		248.528	319.745		681.023		302.228	466.07				527.072		614.332		423.497	586.552
		249.067	319.876		681.239		302.774	466.527				527.343		614.419		424.591	589.069
		249.42	320.418		681.881		303.223	467.342				527.884		614.761		425.023	590.181
		249.884	323.9		682.372		304.886	468.222				528.243		614.929		425.558	591.035
		249.893	324.345		682.945		304.95	468.879				529.396		615.416		426.114	591.196
		250.203	324.81		683.011		305.321	469.514				529.41		615.953		426.756	591.595
		250.224	325.063		683.098		305.366	469.805				529.97		619.635		427.865	592.032
		250.34	325.12		683.276		305.476	469.83				531.272		620.548		428.186	592.084
		250.713	325.218		683.703		306.077	470.172				532.905		621.48		428.379	592.165
		250.813	326.168		685.183		306.134	470.239				533.569		621.803		428.973	592.24
		251.112	327.792		687.288		306.272	470.708				535.069		622.58		429.439	592.651
		251.314	328.147		687.344		306.399	471.053				535.202		623.419		429.948	592.862
		251.482	328.169		687.813		306.95	471.207				535.418		624.057		430.208	593.933
		251.876	328.615		688.612		307.066	471.96				535.433		626.169		430.537	595.162
		251.884	329.225		689.094		307.286	472.812				535.549		626.488		431.135	596.204
		251.888	329.556		689.299		307.417	472.984				536.612		627.481		431.232	597.829
		252.516	329.848		689.543		307.631	473.643				538.269		627.719		432.621	598.71
		252.704	329.938		690.659		307.709	473.773				539.517		627.791		433.222	598.762
		253.027	330.568		691.517		307.756	474.744				539.704		628.411		433.956	598.854
		253.187	330.939		692.073		308.527	475.632				540.022		629.222		434.074	599.477
		253.372	330.974		692.585		308.673	475.821				540.694		629.6		434.884	599.548
		253.392	331.059		693.042		309.03	476.294				542.392		631.137		435.043	599.614
		253.424	332.174		694.027		309.203	476.382				543.489		632.268		435.148	599.737
		253.472	332.192		694.065		309.347	477.661				548.322		633.601		435.453	600.187
		253.92	332.387		694.161		309.395	477.893				549.05		635.432		436.195	600.335
		254	332.523		694.457		309.53	478.46				549.731		636.494		436.414	601.315
		254.067	333.096		694.829		309.602	478.749				549.948		636.513		436.432	602.55
		254.663	333.438		695.172		309.704	479.069				551.158		639.734		436.572	602.687
		254.749	333.717		695.31		309.723	479.379				553.797		640.342		437.074	603.023
		255.098	333.753		696.221		309.829	479.983				554.564		640.697		438.612	603.505
		255.73	334.088		698.202		310.035	480.069				554.682		641.184		438.773	604.459
		255.838	335.351		699.683		310.188	480.884				555.448		641.913		439.182	604.576
		255.905	335.394		700.246		310.719	481.84				556.775		642.072		440.094	604.739
		255.95	335.86		700.325		310.943	482.059				557.021		642.402		440.852	605.489
		257.152	336.476		700.96		311.067	482.281				557.251		642.868		442.016	605.708
		257.525	337.845		701.678		311.153	482.388				557.762		645.718		442.233	606.601
		257.669	338.399		701.884		311.995	483.325				558.337		646.78		442.252	606.757
		257.755	338.694		701.99		312.673	483.364				558.519		647.084		442.534	607.129
		258.229	338.852		703.814		312.775	483.488				560.904		647.115		443.759	608.986
		258.349	339.225		703.926		313.008	483.642				562.285		647.409		444.172	609.353
		259.761	339.751		704.143		313.052	483.901				562.872		647.699		444.239	609.799
		261.963	339.804		704.268		313.389	484.735				563.232		647.802		444.419	610.268
		262.649	340.46		704.345		313.493	486.07				563.709		648.491		445.445	611.608
		262.965	340.847		705.859		313.523	486.376				563.853		648.78		445.632	612.121
		263.236	341.652		706.496		313.62	487.06				564.5		650.158		446.575	612.495
		263.824	342.321		707.213		313.718	488.602				565.699		650.441		446.803	612.733
		263.937	342.346		709.917		313.82	489.239				566.136		650.824		448.65	613.144
		263.98	343.104		709.969		313.848	490.159				567.134		650.904		449.284	613.533
		264.28	343.429		712.688		314.034	490.615				567.71		652.719		449.974	613.873
		264.319	343.451		714.672		314.266	490.756				568.566		652.964		451.37	614.278
		264.704	343.69		715.324		314.341	491.065				569.345		653.3		451.532	614.995
		264.887	343.835		715.485		314.873	491.731				569.606		654.392		452.445	615.195
		265.533	344.184		715.718		314.965	492.433				570.186		654.849		452.536	615.596
		265.722	345.752		715.974		315.034	492.546				571.346		655.895		452.699	617.313
		266.163	345.917		716.874		315.644	492.728				571.794		656.426		452.936	618.149
		266.758	346.068		718.237		316.14	492.836				572.058		658.846		453.675	619.492
		267.388	346.375		719.271		316.202	493.201				573.61		659.061		454.755	620.587
		267.63	346.912		720.368		316.278	493.47				573.703		660.922		455.366	620.821
		267.768	347.274		720.419		316.747	493.554				574.171		660.935		455.436	621.081
		268.918	347.439		721.252		316.809	494.713				575.069		663.284		455.683	621.892
		268.935	347.488		722.155		317.161	494.802				575.554		664.355		455.817	622.073
		269.062	347.723		722.763		317.769	495.479				576.618		665.069		455.983	622.147
		269.48	348.136		724.103		317.809	495.822				577.392		665.623		456.324	623.802
		270.479	348.254		724.138		318.368	496.127				577.898		665.684		456.535	624.225
		270.878	348.472		724.144		318.565	497.243				578.3		666.602		458.106	624.235
		271.732	349.005		724.339		318.689	497.302				579.307		667.392		458.353	624.483
		271.864	349.046		724.762		318.987	497.441				580.237		668.909		458.355	624.619
		272.003	349.684		724.852		319.427	498.91				581.864		669.522		460.927	625.457
		272.113	349.729		726.086		319.508	499.194				584.07		669.731		461.312	626.643
		272.237	350.245		726.357		319.748	500.389				584.292		671.554		461.944	628.031
		272.335	350.781		726.956		320.773	500.909				584.768		671.921		462.428	628.234
		272.44	350.885		728.151		320.8	501.582				585.952		672.972		464.161	629.191
		272.556	351.865		728.304		321.687	502.518				588.024		673.252		469.381	629.347
		273.387	352.103		728.349		321.78	502.752				589.773		673.293		470.097	630.963
		273.673	352.727		729.444		321.91	502.772				590.039		678.062		470.518	631.351
		274.561	353.277		729.616		321.926	502.92				590.879		679.601		470.671	632.093
		275.112	353.875		730.202		321.937	504.034				591.106		679.77		470.708	632.666
		276.15	354.038		730.941		322.649	504.32				593.131		680.678		470.823	632.889
		276.514	354.088		731.591		323.181	504.81				593.542		681.574		470.826	633.231
		277.515	354.79		732.487		323.2	505.983				593.97		682.442		471.373	634.379
		277.876	354.856		732.66		323.289	506.32				594.698		682.64		471.817	634.694
		278.276	355.303		733.689		323.543	508.577				595.071		684.1		471.986	634.894
		278.883	357.079		733.808		323.828	508.991				595.133		684.238		472.965	635.496
		278.958	357.131		734.149		323.844	509.22				597.269		689.284		473.57	636.98
		279.324	357.222		735.411		324.717	509.633				597.404		691.709		474.546	637.731
		280.068	357.273		735.709		326.62	509.973				601.611		691.822		474.776	638.633
		280.237	357.399		735.777		326.786	510.336				602.744		692.463		475.264	639.284
		280.423	357.4		736.02		326.807	510.679				605.128		695.001		475.897	639.618
		281.525	357.568		736.253		327.465	510.72				608.237		696.002		476.134	639.86
		281.873	357.697		737.637		327.553	511.183				609.964		697.13		476.441	641.083
		282.04	357.894		737.866		327.716	511.559				610.87		697.944		477.634	641.483
		282.442	358.804		738.165		327.949	512.478				612.149		698.46		478.482	642.713
		283.327	361.735		738.58		328.358	515.6				614.545		698.561		478.545	642.73
		283.443	362.375		740.027		328.76	515.93				615.936		698.78		479.978	644.468
		283.604	362.546		741.454		328.818	516.046				616.391		699.878		480.757	644.556
		283.626	362.552		743.073		329.447	516.921				618.564		699.975		480.955	644.851
		283.648	362.924		743.36		329.46	516.952				618.931		700.257		481.167	647.219
		283.653	363.253		744.631		329.602	517.362				619.056		706.328		481.541	647.228
		284.521	364.228		744.675		329.632	517.628				619.579		706.408		481.795	647.531
		284.533	364.325		745.539		330.105	517.744				619.707		706.895		481.909	647.564
		284.9	365.194		745.656		330.32	517.89				621.664		707.384		482.352	648.097
		285.911	365.44		746.034		330.401	518.679				622.109		707.912		482.699	648.197
		286.338	365.621		747.107		331.547	518.685				623.378		708.414		485.155	648.369
		286.434	365.916		747.184		331.614	518.839				624.086		708.944		486.065	648.528
		286.646	366.843		747.208		331.973	519.474				624.294		709.519		486.636	648.646
		287.23	367.158		747.51		332.191	520.107				625.096		709.583		486.636	649.23
		287.693	368.39		747.581		332.427	520.66				625.664		710.343		487.569	649.331
		287.84	368.739		747.613		332.69	521.486				625.713		712.2		488.499	649.434
		288.299	368.796		747.814		332.797	521.8				625.79		713.809		489.515	649.49
		289.954	369.47		748.745		332.977	521.907				626.121		713.884		489.692	649.827
		289.979	369.577		748.931		333.303	521.913				626.792		713.957		490.078	650.008
		290.421	369.644		749.012		333.365	522.297				627.053		714.009		490.354	650.337
		290.476	369.785		750.289		333.427	522.439				629.843		714.142		490.465	650.41
		291.453	370.303		751.5		333.738	522.503				630.477		714.803		490.647	651.569
		291.498	370.343		751.741		333.8	522.693				630.574		714.94		491.434	652.075
		292.005	371.343		751.751		334.124	522.747				631.259		715.246		492.737	654.914
		292.359	371.956		752.23		334.362	522.834				631.323		715.757		492.991	656.073
		292.897	372.534		752.571		334.604	522.864				632.751		716.091		493.382	656.672
		292.901	372.538		752.854		334.92	522.979				635.027		716.94		493.59	656.873
		293.016	372.893		754.098		335.111	524.211				635.31		717.164		493.625	657.62
		293.546	373.642		754.29		335.206	526.712				635.391		717.327		493.826	657.713
		293.725	373.929		754.618		335.772	526.729				635.987		717.459		493.942	657.988
		293.774	374.594		754.929		335.847	528.151				637.271		717.683		494.261	658.212
		294.407	375.277		754.99		335.871	528.343				638.056		719.693		494.537	659.199
		294.415	375.328		755.756		335.898	528.986				638.547		720.735		494.772	659.263
		294.593	375.444		755.798		336.011	529.234				639.55		720.835		495.556	659.939
		294.65	375.872		756.21		336.05	529.272				640.083		721.028		495.621	660.765
		295.078	376.668		757.514		336.625	529.393				640.896		723.62		497.148	661.602
		295.508	377.018		757.603		336.625	530.563				641.07		725.212		497.243	661.909
		296.287	378.086		758.34		336.964	530.583				641.41		726.331		498.006	663.115
		297.268	378.235		758.714		337.061	530.633				641.911		726.435		498.19	663.441
		297.883	378.847		759.081		337.104	530.844				642.651		726.805		498.273	663.602
		298.009	378.914		759.997		337.47	531.322				643.524		727.151		498.421	664.093
		298.369	379.254		760.028		337.475	532.806				646.358		727.231		498.496	664.375
		298.741	380.577		760.35		337.879	534.43				646.585		727.26		499.786	667.319
		299.241	380.708		761.346		338.891	534.467				646.94		728.182		500.191	667.341
		299.381	380.961		761.589		339.147	534.77				647.076		728.398		501.103	669.635
		300.09	381.462		761.799		339.4	535.158				650.148		728.741		501.226	671.195
		300.249	381.774		761.896		339.726	535.413				650.641		728.985		501.226	671.235
		300.421	382.774		762.675		340.981	536.203				653.23		729.08		501.306	671.683
		301.015	383.073		762.77		340.994	536.729				653.994		729.155		501.359	672.111
		301.243	383.783		763.009		341.175	536.879				657.356		729.16		501.534	672.523
		301.338	384.467		764.009		341.175	537.196				657.617		729.375		501.701	673.227
		301.364	384.729		765.785		341.471	537.266				659.422		730.849		501.964	673.615
		301.655	384.949		766.371		341.706	538.287				661.253		731.636		502.795	674.328
		302.437	384.965		767.528		342.614	538.434				663.728		732.458		503.897	674.826
		302.602	385.161		767.62		343.851	538.931				664.45		733.76		505.145	675.51
		303.017	385.809		768.263		343.911	539.766				664.924		733.977		506.136	676.756
		303.787	386.049		768.341		343.993	539.814				666.106		734.433		506.776	677.517
		303.835	386.612		768.723		344.019	540.132				666.472		734.762		506.813	678.146
		304.162	387.237		769.305		344.06	540.323				667.006		734.77		506.89	678.239
		304.225	387.759		769.486		344.621	540.679				668.285		735.96		507.258	678.88
		304.599	387.772		770.712		344.806	541.511				669.699		736.287		508.096	680.094
		304.622	388.095		771.592		344.814	542.316				670.026		736.786		509.178	680.652
		305.347	388.356		773.3		344.978	542.32				671.528		737.246		509.765	680.88
		305.47	388.563		773.516		345.045	542.69				671.83		738.135		510.021	681.635
		305.703	389.514		773.723		345.074	542.707				673.757		741.114		510.21	682.037
		306.187	389.566		773.727		345.077	543.527				675.333		741.552		510.499	682.085
		306.379	389.74		774.467		345.085	543.631				675.432		741.667		510.575	682.265
		306.445	390.379		774.793		346.148	543.987				680.219		742.203		510.728	682.503
		306.539	391.232		776.651		346.271	544.14				680.666		742.523		510.982	682.875
		306.579	392.907		776.978		346.448	544.951				683.39		742.606		513.04	683.051
		306.925	393.043		777.054		346.55	545.153				684.337		743.928		513.262	683.103
		306.983	393.554		777.244		346.657	545.253				684.411		744.018		514.089	683.363
		308.577	395.26		778.475		347.026	545.437				684.526		744.319		514.703	684.552
		308.714	395.699		778.735		348.101	546.47				685.766		745.306		515.171	685.026
		308.866	396.157		778.826		348.105	546.98				687.096		746.043		516.37	685.484
		309.175	396.563		779.229		349.195	547.002				687.14		747.078		516.865	685.695
		309.395	398.089		779.369		349.651	547.339				687.368		748.008		516.972	685.788
		309.525	398.247		779.904		349.675	548.352				688.417		748.031		516.983	685.854
		309.563	399.061		780.218		350.27	549.445				689.672		749.664		517.063	685.927
		309.626	399.101		780.669		350.324	549.769				693.638		750.712		517.641	686.497
		309.752	400.433		781.461		351.384	549.941				695.065		751.258		517.761	687.072
		309.862	401.773		782.277		351.429	550.421				695.32		751.627		518.637	688.533
		310.049	402.015		782.948		351.748	550.622				696.332		751.833		519.035	689.207
		310.196	402.406		782.997		351.905	551.322				697.339		753.643		519.516	689.54
		310.279	402.912		783.662		352.014	552.062				699.743		754.355		519.699	690.2
		310.309	403.198		783.667		352.113	552.294				699.843		755.116		520.037	690.661
		310.967	403.961		784.545		352.825	552.313				699.934		755.157		520.058	690.719
		311.307	404.374		785.016		352.897	554.142				700.344		756.007		521.374	690.878
		312.245	405.372		785.448		352.919	554.465				700.598		756.276		521.827	692.872
		312.902	405.849		785.643		353.384	554.591				701.825		758.623		522.381	692.904
		313.013	407.297		786.62		353.667	555.54				702.111		759.093		522.58	693.449
		313.081	407.343		787.055		353.983	556.665				702.683		762.755		523.425	694.017
		313.556	407.97		787.395		354.005	556.737				704.009		766.228		523.431	696.015
		313.616	408.053		788.561		354.155	557.401				704.01		766.926		523.605	697.131
		313.637	408.673		788.917		355.169	557.976				707.103		767.778		523.656	697.398
		313.826	408.808		789.236		356.086	557.999				708.883		767.874		524.808	697.407
		314.576	409.437		789.41		356.094	558.346				709.635		768.035		525.59	697.426
		314.733	410.36		790.141		356.254	559.146				711.816		768.801		526.353	697.696
		314.882	410.451		790.428		356.509	559.88				712.125		769.2		526.833	697.953
		315.248	411.213		790.645		357.089	560.119				713.392		769.232		527.069	699.152
		315.436	411.411		790.755		357.275	560.501				713.48		769.654		527.167	699.935
		315.546	411.726		790.839		358.462	561.198				714.839		769.699		527.282	699.939
		315.602	411.727		790.919		358.843	561.54				715.625		771.505		527.6	699.955
		315.654	412.045		791.707		358.867	561.668				716.189		772.17		528.551	700.265
		315.74	412.734		792.057		359.244	561.693				718.782		772.225		528.618	701.2
		316.063	413.165		792.463		359.452	561.89				719.404		772.299		528.861	701.248
		317.07	413.461		793.494		359.723	562.006				719.446		773.703		528.904	701.782
		317.266	414.692		793.907		359.859	563.737				719.457		774.329		529.204	701.952
		317.47	414.748		794.369		360.158	564.368				720.771		774.925		529.237	702.36
		319.922	414.889		794.725		360.554	564.751				720.949		776.53		529.337	703.755
		320.267	415.104		795.089		361.082	564.776				721.045		777.76		531.48	703.774
		320.413	415.824		795.477		361.178	565.036				721.557		778.41		532.351	704.65
		321.559	416.854		795.814		361.206	565.545				721.778		778.512		532.605	704.753
		321.862	417.277		796.896		361.272	565.643				722.419		778.56		533.196	705.794
		322.215	417.457		797.006		361.638	565.975				722.639		779.802		533.563	706.466
		322.827	417.574		798.239		361.752	566.022				722.683		779.97		533.714	706.707
		323.406	417.618		798.353		362.231	566.161				723.641		782.412		533.865	707.293
		323.492	418.052		800.521		362.305	566.675				725.282		782.497		535.204	707.675
		323.624	418.54		800.84		362.462	566.737				725.362		782.991		535.534	709.798
		324.343	419.333		801.655		362.479	567.282				726.27		783.246		536.229	710.318
		324.472	420.28		801.812		362.95	567.333				727.727		783.253		537.327	710.794
		324.844	420.526		802.611		363.003	568.255				727.887		784.007		537.876	711.489
		325.215	420.815		802.663		363.148	569.175				728.783		784.477		537.974	711.715
		325.535	421.462		802.963		363.378	569.41				729.621		785.935		538.05	711.818
		325.731	421.743		804.167		363.46	569.757				730.504		787.132		538.13	712.423
		325.849	422.201		804.196		365.422	570.593				731.747		787.175		539.045	713.04
		326.029	422.944		804.203		366.38	571.181				733.263		787.366		539.183	713.27
		326.282	423.008		804.358		366.647	571.391				733.468		787.609		539.231	714.29
		327.38	423.178		804.45		366.997	571.588				734.109		788.559		539.888	714.57
		327.601	423.362		805.964		367.042	571.805				736.996		788.715		540.184	715.784
		327.714	424.068		806.258		367.08	572.662				738.239		791.298		540.662	715.989
		328.195	425.558		806.372		367.296	572.861				738.254		792.892		540.76	716.508
		328.653	426.102		807.047		367.829	572.864				739.855		792.906		541.143	717.072
		328.825	426.752		807.473		367.86	572.98				740.464		792.951		541.403	719.291
		329.044	427.313		808.487		368.013	573.988				741.058		793.397		542.027	719.531
		330.365	427.95		809.46		368.686	574.3				742.178		794.208		542.365	719.89
		331.046	428.254		812.036		368.926	574.449				742.333		794.394		542.855	720.222
		331.246	428.558		812.105		369.484	574.632				744.424		794.739		542.926	720.475
		331.632	428.735		812.203		370.002	574.777				747.181		795.231		543.543	720.523
		331.693	429.46		812.435		370.406	575.032				747.227		795.487		543.757	720.982
		332.081	429.639		812.633		370.419	575.813				747.345		795.623		543.911	721.78
		332.777	429.709		813.511		370.615	575.891				747.722		798.728		543.935	721.92
		332.935	429.791		815.027		370.653	576.046				748.795		799.302		544.747	722.29
		334.902	430.506		815.344		370.735	577.344				751.231		799.619		545.071	722.357
		335.026	430.713		815.902		371.158	578.599				751.319		799.831		546.38	722.372
		335.18	431.314		816.363		372.187	579.496				751.375		800.459		549.203	722.483
		336.12	431.323		816.429		372.19	579.964				751.847		801.831		550.352	722.523
		336.258	431.471		816.768		372.33	580.111				752.801		802.445		550.934	723.283
		336.52	432.489		817.753		373.64	580.185				753.316		803.158		550.941	724.424
		337.506	433.967		817.761		373.886	580.225				753.355		803.491		551.3	725.203
		338.044	434.843		817.788		373.909	581.394				755.505		805.094		551.845	726.204
		338.518	435.287		817.985		374.205	581.623				755.966		807.416		552.075	726.214
		338.745	435.404		818.131		374.903	581.787				756.361		808.716		552.189	726.543
		338.989	437.64		818.157		375.317	581.946				757.675		809.847		553.205	728.051
		339.025	437.688		818.509		375.931	582.232				757.933		811.364		553.7	728.142
		339.259	437.784		820.648		376.73	582.377				758.538		813.567		554.017	728.543
		339.332	438.005		821.21		377.065	582.546				759.648		814.75		554.862	728.736
		339.471	438.42		822.743		377.071	583.989				760.442		815.243		554.873	729.073
		340.281	438.774		823.088		377.997	584.073				762.31		816.562		555.536	729.427
		340.451	439.056		823.459		378.249	585.272				762.607		816.851		556.577	730.326
		340.561	440.387		824.354		378.759	585.332				763.001		817.079		557.792	730.619
		341.262	440.597		824.659		378.762	585.786				763.517		817.286		557.865	730.803
		341.344	440.653		824.814		379.155	586.001				764.451		818.751		558.769	731.662
		341.611	441.02		824.95		379.202	586.759				766.682		819.696		558.955	732.965
		341.909	441.06		825.254		379.265	587.798				766.694		820.464		558.998	732.984
		342.682	441.063		825.854		379.629	588.241				767.008		820.495		560.292	733.65
		343.043	441.585		826.135		380.084	589.629				767.212		823.704		560.437	733.823
		343.177	442.037		826.56		380.812	589.643				768.285		823.877		560.484	733.96
		343.368	442.36		826.74		380.861	590.162				770.007		824.041		560.712	734.004
		343.4	442.928		827.798		380.938	590.389				770.43		824.691		562.087	734.059
		343.636	442.984		828.495		381.359	591.144				771.624		824.967		562.507	734.175
		344.526	443.39		829.302		381.751	591.301				772.404		825.192		562.752	734.407
		344.621	443.789		829.729		382.186	591.398				775.162		825.61		563.209	734.522
		345.106	444.23		829.982		382.2	591.674				775.697		825.936		563.629	734.568
		345.454	444.431		830.063		382.267	592.257				775.973		825.945		564.462	734.937
		346.142	445.164		830.848		382.278	592.574				776.22		827.862		565.593	735.077
		346.569	445.257		831.974		384.033	592.723				776.866		828.233		565.962	735.377
		346.829	445.94		832.721		384.861	593.064				777.671		828.475		566.175	735.724
		346.932	446.643		832.957		384.881	594.127				778.423		829.076		566.614	735.84
		347.636	446.679		833.239		385.127	594.531				778.824		829.132		566.84	736.023
		347.869	446.827		833.771		385.247	594.819				779.381		829.436		566.884	736.171
		348.23	447.183		833.966		385.73	595.201				779.907		829.9		566.922	736.697
		348.256	447.217		834.248		386.157	595.237				780.702		830.735		567.1	736.894
		348.388	447.572		835.005		387.053	595.486				781.254		830.834		567.494	737.711
		348.391	447.642		836.44		387.075	595.829				783.107		830.908		569.698	737.781
		349.229	447.874		837.878		387.51	595.924				784.181		830.91		570.145	738.367
		349.45	447.898		837.919		388.011	596.236				785.153		831.863		571.322	738.492
		349.542	447.921		838.316		388.087	596.71				785.815		831.885		571.487	738.897
		349.858	448.246		838.452		388.328	597.048				786.976		831.95		571.648	742.579
		349.914	449.257		838.501		388.631	597.313				787.829		832.033		571.757	742.608
		350.225	449.497		838.653		388.887	597.689				787.947		832.158		571.802	742.805
		350.339	449.745		838.82		389.051	598.208				788.232		832.877		571.891	742.941
		350.453	450.006		839.876		389.099	598.603				789.354		833.288		571.903	743.582
		350.598	450.325		840.478		389.25	599.01				790.48		834.276		572.475	743.747
		350.943	450.727		840.722		389.257	599.198				791.964		834.896		572.55	743.941
		351.062	451.023		841.14		389.326	599.468				792.445		835.292		573.198	744.683
		351.504	451.156		842.659		389.63	599.495				793.191		837.904		573.564	745.616
		351.765	451.22		843.018		389.686	599.761				794.272		838.556		573.771	746.238
		351.886	452.221		845.122		389.84	600.348				794.398		840.478		574.09	746.867
		351.929	454.341		845.359		391.087	600.391				794.598		841.208		574.259	747.238
		351.975	454.466		845.824		391.252	600.679				795.722		841.354		574.758	750.103
		352.248	454.694		846.967		391.421	600.72				796.603		841.498		574.938	750.151
		352.422	455.273		850.38		391.61	600.728				796.615		841.896		575.057	750.235
		352.979	455.897		850.623		392.007	600.778				796.793		842.618		575.208	750.801
		353.006	456.651		850.642		392.176	601.084				796.875		844.407		575.227	750.813
		353.164	457.07		850.653		392.374	601.368				797.191		845.199		575.619	751.189
		353.9	457.2		851.023		392.938	602.35				798.051		845.539		576.871	751.208
		354.55	458.139		851.135		393.196	602.515				798.538		845.734		578.361	751.841
		355.324	460.978		852.453		393.338	602.719				800.841		846.661		578.871	752.137
		355.349	461.039		853.11		393.611	603.166				801.709		849.181		578.917	752.298
		355.369	461.554		853.199		394.207	603.716				802.243		849.291		578.998	752.563
		355.523	461.572		854.727		394.423	603.751				803.11		849.306		579.462	752.572
		355.86	461.737		855.323		394.762	603.776				804.63		849.31		579.6	752.809
		356.022	461.85		855.824		395.034	604.167				804.7		850.398		579.721	753.402
		357.325	462.514		855.88		395.059	604.368				805.041		850.656		579.844	754.298
		357.811	462.563		856.568		395.37	604.474				806.754		850.83		579.856	754.41
		358.053	462.652		857.535		396.359	605.317				806.846		851.296		580.086	754.59
		358.177	462.757		857.56		396.597	605.562				807.012		851.55		581.989	755.041
		358.624	463.276		857.869		396.642	606.598				807.309		853.206		582.227	755.053
		358.728	463.534		858.671		397.092	606.902				807.746		853.728		582.256	755.748
		359.206	464.102		859.14		397.981	607.063				808.126		854.451		583.143	756.151
		359.394	464.196		859.287		399.215	607.091				808.126		854.618		583.723	756.492
		359.521	465.775		859.521		399.298	607.413				809.76		855.473		584.561	757.16
		360.061	466.211		859.975		399.305	608.033				810.424		857.398		584.936	758.127
		360.546	466.551		860.331		399.641	608.549				811.112		857.753		585.714	758.147
		360.669	466.624		860.651		399.847	608.92				811.837		858.675		586.02	758.37
		360.685	467.154		861.219		400.777	608.978				813.541		858.709		586.073	758.573
		360.934	467.363		861.295		401.21	608.993				813.595		859.1		586.471	758.673
		361.187	467.468		861.684		401.749	609.022				813.926		859.354		587.611	759.007
		361.317	467.691		862.951		401.837	609.692				815.757		859.38		587.863	759.565
		361.451	468.162		864		401.957	609.87				816.069		859.668		588.248	759.656
		361.86	468.262		864.526		401.995	609.99				820.067		860.191		588.395	759.871
		362.04	468.368		864.869		402.047	610.734				821.84		862.065		588.681	759.985
		362.106	469.87		865.644		402.283	611.481				822.525		862.437		589.678	762.432
		362.612	470.233		866.425		402.34	611.571				822.928		862.624		590.037	762.534
		362.808	471.498		867.754		402.608	611.637				822.984		865.847		590.827	763.347
		362.865	471.921		867.763		402.828	611.702				824.764		866.099		591.979	763.678
		363.118	472.123		867.887		402.856	612.072				825.718		867.084		592.399	764.366
		363.266	472.362		868.838		402.988	613.373				826.166		867.715		592.416	764.443
		363.703	472.867		869.53		403.542	613.493				827.024		869.684		592.783	764.655
		364.261	473.174		869.57		403.661	613.537				827.462		869.869		593.953	765.036
		365.286	473.414		870.135		403.775	613.723				827.951		870.244		593.957	765.076
		366.86	473.618		871.459		404.027	614.054				828.049		872.868		594.117	765.429
		367.104	473.926		871.934		404.15	614.201				828.75		873.536		594.383	766.336
		368.925	473.966		872.411		405.555	614.4				829.385		874.768		594.498	766.636
		369.127	474.275		873.241		405.725	614.464				830.056		875.158		595.347	767.441
		369.804	475.339		873.504		405.955	614.607				831.694		875.763		595.886	768.208
		369.862	476.269		873.928		406.573	614.669				832.704		875.841		596.157	768.259
		370.904	476.461		874.128		406.626	615.124				833.352		875.845		596.487	768.469
		371.636	476.516		874.228		406.822	615.236				834.259		876.297		596.918	769.042
		372.353	476.724		875.315		406.959	615.522				834.329		876.76		597.337	769.05
		372.883	476.879		875.617		407.421	615.561				836.176		877.256		597.488	769.402
		372.903	477.424		876.722		407.942	615.835				837.031		877.395		597.786	769.86
		373.712	477.941		877.174		407.998	615.93				837.78		877.628		598.513	770.009
		374.284	478.607		879.449		408.132	615.942				838.648		877.871		598.515	770.131
		374.355	478.747		879.45		408.284	617.231				839.057		878.092		599.87	770.321
		374.458	479.822		879.466		408.337	618.461				839.477		878.898		600.305	771.246
		375.753	480.152		881.392		408.433	618.738				839.75		879.304		600.315	771.77
		375.772	480.688		882.986		409.061	619.429				839.84		879.396		600.497	772.038
		376.011	481.01		883.14		409.119	619.54				839.983		879.743		600.57	772.103
		376.408	481.784		884.35		409.299	619.587				840.15		880.087		600.696	772.142
		376.747	482.26		884.602		409.998	619.846				840.298		880.837		601.537	772.344
		376.911	482.662		884.681		410.126	620.266				841.668		881.735		601.648	774.092
		377.045	482.891		884.833		410.297	620.633				841.943		882.952		602.101	774.596
		377.478	484.547		885.401		410.299	620.866				842.471		883.325		603.577	774.791
		378.543	484.695		886.73		410.305	621.131				843.868		883.829		604.099	775.268
		378.675	484.998		887.41		410.806	621.602				844.712		883.959		604.577	775.634
		379.211	485.287		887.503		410.808	621.669				845.494		884.599		604.737	776.077
		379.423	485.326		887.508		410.834	621.772				845.777		885.205		605.296	776.426
		379.863	486.144		887.568		411.051	621.911				846.515		885.476		605.634	777.658
		379.944	486.232		887.864		411.531	621.925				848.109		885.773		606.018	778.661
		379.949	486.767		888.157		411.658	622.031				849.347		887.252		606.028	778.746
		380.041	486.98		889.492		411.717	622.244				849.586		887.378		606.592	779.028
		380.598	489.169		889.619		411.885	622.923				850.117		887.976		607.903	780.274
		380.768	489.232		892.081		412.257	623.159				850.168		889.047		608.107	781.151
		381.321	489.432		892.534		412.744	623.402				851.391		889.725		608.671	781.993
		381.77	489.719		892.634		412.895	623.411				851.88		890.911		608.71	782.191
		381.997	490.054		892.739		413.075	623.503				852.321		891.959		608.8	782.366
		382.334	490.096		892.868		413.323	623.964				852.609		892.747		609.26	782.6
		382.486	490.109		893.055		413.715	624.096				853.982		892.935		609.557	782.946
		382.904	490.392		894.121		414.337	624.595				854.059		893.534		609.755	783.016
		383.066	491.08		894.233		414.405	625.945				854.545		893.64		609.776	783.499
		383.161	491.446		894.748		414.713	626.446				855.023		894.325		609.878	784.07
		383.214	491.559		894.872		414.943	626.71				855.259		894.38		610.093	784.466
		383.508	493.116		896.718		415.103	626.779				855.766		894.608		611	784.503
		384.087	494.095		897.069		415.188	626.858				856.978		894.73		611	784.836
		384.196	494.298		897.255		415.355	627.224				857.534		895.524		612.484	785.043
		384.27	495.004		897.931		415.401	627.845				859.446		895.96		612.937	785.276
		384.326	495.228		898.13		415.689	628.058				859.448		896.752		613.809	786.049
		384.473	495.906		898.199		415.77	628.845				859.957		897.796		614.699	786.861
		384.476	496.366		898.609		415.992	628.886				860.062		898.078		615.972	788.415
		384.849	496.486		898.977		416.275	629.655				860.344		898.703		616.554	788.981
		386.364	496.764		899.471		417.126	629.69				860.389		899.194		618.088	789.194
		386.365	496.954		900.405		417.39	629.89				861.27		899.384		618.978	789.321
		386.412	497.03		901.406		417.73	630.553				862.902		900.327		619.871	789.463
		386.581	497.11		901.618		418.048	630.569				862.929		901.078		620.315	789.844
		386.604	497.897		902.018		418.749	630.83				864.882		901.568		620.649	790.641
		386.7	498.045		902.769		418.842	630.941				865.809		903.003		621.376	790.705
		386.788	498.095		902.958		418.864	631.369				865.867		904.048		621.482	792.74
		386.928	498.142		904.092		419.336	631.4				866.374		905.178		622.353	793.019
		387.267	498.765		906.276		419.378	631.825				866.63		907.115		623.263	793.513
		387.483	499.14		906.989		419.454	632.848				867.13		908.026		623.62	793.58
		387.618	499.545		907.34		419.698	632.99				868.072		908.134		624.29	794.126
		388.135	499.572		907.756		419.886	634.3				868.16		908.507		624.412	794.625
		388.669	499.943		908.076		420.511	634.499				868.431		909.283		624.426	795.24
		388.996	500.129		908.539		420.692	635.851				868.693		909.566		624.787	795.306
		389.07	500.261		908.553		420.72	637.367				869.698		909.634		624.997	795.622
		389.209	500.315		908.91		421.022	637.667				869.91		911.072		625.294	795.699
		390.154	500.665		910.961		421.26	637.958				870.162		912.262		625.49	795.758
		391.421	500.853		911.193		421.319	637.976				871.02		913.6		625.932	796.066
		391.445	501.321		911.839		421.571	638.014				872.697		914.246		626.024	796.142
		391.557	501.676		912.457		421.6	638.015				875.717		914.454		626.784	796.289
		391.831	503.149		912.726		421.822	638.96				875.878		915.594		627.042	797.073
		392.248	504.036		913.036		421.874	639.049				877.553		917.222		627.122	797.332
		392.316	504.681		913.628		422.109	639.079				877.85		918.197		627.255	797.646
		392.496	504.925		913.643		422.413	639.566				879.637		919.385		627.54	797.853
		392.66	505.046		914.371		422.507	639.595				880.168		921.271		628.107	798.115
		392.759	505.486		914.431		423.08	639.626				881.382		921.857		628.243	798.344
		393.157	506.61		914.566		423.281	640.081				882.035		922.285		628.386	800.265
		393.737	507.321		914.574		423.539	642.705				882.325		922.299		628.774	800.499
		394.089	507.429		914.638		423.573	642.964				884.341		924.52		629.188	800.549
		394.093	507.533		915.134		423.584	643.668				884.821		926.261		629.252	800.808
		394.307	508.136		915.622		423.743	643.804				884.872		927.233		629.536	800.901
		394.933	508.15		915.712		424.317	644.233				885.658		928.831		629.564	801.005
		394.981	508.157		916.176		424.628	644.9				885.69		931.357		630.087	801.245
		394.999	508.634		916.181		425.068	645.306				886.248		933.108		630.253	801.305
		395.316	509.044		916.256		425.279	646.332				887.274		933.385		630.315	801.382
		395.379	509.322		916.81		425.43	646.654				887.412		936.087		630.489	801.468
		395.588	510.15		916.972		425.848	646.664				887.974		938.073		630.669	801.918
		395.598	510.172		917.86		426.003	646.673				888.299		938.217		630.709	802.785
		395.682	510.468		918.523		426.109	646.777				888.672		938.452		631.13	802.975
		395.821	510.787		918.55		426.327	647.293				889.208		938.56		631.738	805.539
		395.926	510.904		918.892		426.836	647.608				889.562		938.8		631.788	805.984
		396.532	511.004		920.527		426.925	647.631				889.889		939.048		632.988	806.113
		396.713	511.26		921.119		426.934	648.075				891.018		939.06		633.104	806.145
		397.117	512.178		921.532		426.995	648.102				891.713		939.533		633.592	806.538
		397.798	513.254		921.873		427.742	648.237				892.008		940.432		634.068	806.826
		398.337	513.553		922.111		427.954	648.294				892.325		940.465		634.129	806.843
		398.438	514.127		922.473		428.214	649.901				894.648		942.282		634.185	807.581
		398.614	514.18		922.718		428.349	651.039				894.837		942.56		634.734	808.508
		398.625	515.524		922.815		428.374	651.087				896.902		942.836		635.787	808.61
		398.626	515.589		923.217		428.462	651.734				897.427		945.137		635.882	808.76
		398.876	515.747		923.322		428.466	652.312				897.485		945.905		636.014	808.787
		399.448	516.632		923.704		428.574	652.561				897.741		946.911		636.146	808.962
		399.609	517.182		923.88		429.116	652.776				897.854		947.012		636.387	809.509
		400.646	517.587		924.124		429.666	652.983				898.885		948.324		636.749	809.57
		400.845	517.832		924.518		429.728	653.125				899.487		949.597		637.189	810.616
		401.304	519.486		924.633		430.151	653.231				901.146		950.783		637.324	811.4
		401.476	519.995		925.279		430.669	654.228				901.438		951.568		637.373	811.667
		401.501	520.779		925.327		431.022	654.464				902.363		953.786		637.398	813.715
		401.978	521.167		926.236		431.671	654.641				902.585		955.352		637.704	814.262
		402.144	521.241		926.302		431.735	654.689				903.837		955.356		637.912	814.322
		402.371	523.254		926.741		431.821	655.086				903.974		956.05		638.011	814.953
		402.751	523.459		926.916		432.467	655.182				903.999		956.295		639.553	815.209
		402.752	523.778		927.662		432.896	656.792				904.164		956.842		639.848	815.325
		402.812	524.023		927.941		433.367	657.018				904.27		957.212		641.715	815.373
		403.187	524.501		928.281		433.43	657.141				904.935		960.137		642.096	816.188
		403.242	525.4		928.86		434.075	657.454				905.374		960.456		642.96	816.961
		403.248	526.116		929.25		435.16	657.503				906.418		961.841		643.419	817.513
		403.602	526.327		929.743		435.933	658.285				908.406		961.864		644.05	817.686
		403.628	527.08		929.868		436.122	659.015				908.966		962.36		644.206	818.406
		403.881	528.01		930.242		436.157	660.3				912.295		962.847		645.038	818.415
		404.12	528.288		930.877		436.681	660.384				912.55		963.717		645.345	820.545
		404.296	528.518		931.035		436.731	660.591				913.01		964.425		645.991	820.693
		405.508	529.224		932.069		436.835	660.61				915.481		965.398		646.138	820.898
		405.555	529.763		932.72		436.863	660.708				916.673		966.184		646.563	820.935
		405.749	530.455		932.893		436.957	661.219				917.674		966.52		646.719	820.949
		406.095	531.361		934.477		437.043	661.297				918.132		967.885		646.818	821.197
		406.15	532.237		934.679		437.309	661.479				920.762		968.018		647.261	821.55
		406.363	532.289		934.717		437.985	662.86				920.817		968.24		647.3	822.322
		406.945	532.567		936.186		438.018	663.049				920.875		970.205		647.32	822.585
		407.194	532.937		936.641		438.137	663.894				921.387		970.444		647.79	822.747
		407.43	533.657		936.729		438.629	664.334				922.018		970.508		647.93	823.626
		408.002	533.763		938.651		438.829	664.349				922.397		971.549		648.079	823.781
		408.924	534.461		939.274		439.244	664.87				922.678		971.629		648.194	823.856
		409.269	534.536		939.499		440.012	665.166				923.782		971.918		648.473	825.097
		409.337	534.978		940.861		440.451	666.029				926.086		973.956		649.891	825.15
		409.743	535.02		942.117		440.506	666.319				926.63		974.03		649.911	825.218
		409.978	535.236		942.13		440.703	666.553				926.685		974.098		649.924	825.743
		410.059	535.424		943.9		441.128	666.728				926.839		975.519		650.002	826.292
		410.255	535.86		943.901		441.14	666.749				927.52		975.526		650.067	826.387
		411.138	536.01		944.736		441.361	667.334				927.603		978.169		650.793	826.448
		411.668	536.276		944.919		442.549	667.983				928.204		978.441		651.223	826.496
		411.738	537.173		945.238		442.716	668.011				928.657		978.829		651.253	826.893
		411.89	537.782		945.641		443.116	668.347				929.101		978.983		651.327	827.002
		412.225	538.37		945.835		443.126	669.071				930.608		979.067		651.877	827.115
		412.418	538.603		945.859		443.505	669.276				931.017		979.157		652.563	827.326
		412.469	538.686		945.956		443.774	669.277				932.279		985.709		653.068	827.492
		412.703	538.96		946.304		443.953	669.398				932.353		986.627		653.442	827.824
		414.355	539.013		947.234		444.627	669.463				933.694		987.573		654.043	827.842
		414.771	539.491		948.788		445.047	669.838				935.412		987.847		654.503	828.959
		414.85	539.678		948.948		445.412	670.062				935.771		988.023		655.009	829.847
		415.185	539.838		951.33		445.55	670.165				935.845		988.794		655.135	830.143
		415.206	540.333		951.392		445.552	670.505				936.22		990.779		655.242	830.693
		415.714	541.272		951.588		445.871	670.726				936.518		991.372		655.398	831.762
		415.846	541.81		951.964		446.286	671.241				937.188		991.568		656.312	832.299
		416.264	542.387		954.105		446.381	671.27				937.692		992.123		656.366	833.057
		416.475	543.154		955.546		446.747	672.618				938.956		992.669		656.405	833.949
		416.491	544.02		956.428		446.831	672.839				940.333		993.114		656.471	834.192
		417.798	544.044		956.709		447.882	672.888				941.556		993.938		656.561	834.195
		418.743	545.325		957.117		447.998	673.165				942.143		998.451		656.795	834.349
		419.008	546.005		957.565		448.142	673.447				943.622		998.58		657	834.655
		419.347	546.142		958.942		448.317	673.539				945.402		999.015		657.316	835.384
		419.482	546.358		959.018		448.615	673.751				945.784		999.38		657.703	835.637
		420.005	546.504		959.261		448.802	674.048				946.014		1000.83		658.266	836.669
		420.432	546.885		960.814		449.112	674.221				946.242		1002.62		658.49	837.101
		420.558	547.279		961.622		449.819	674.266				946.943		1003.27		658.684	837.455
		421.035	547.925		963.02		449.914	674.399				947.852		1004.07		658.762	837.839
		421.672	548.074		963.476		450.664	674.444				949.183		1005.16		659.734	837.87
		421.691	548.69		963.494		450.912	674.468				950.575		1005.25		659.775	838.082
		421.937	549.293		963.9		450.922	674.757				951.489		1005.89		660.169	838.724
		422.403	549.855		964.003		450.998	675.633				951.639		1006.65		660.649	839.091
		422.938	550.364		964.665		451.145	675.697				952.65		1007.45		660.843	840.004
		423.227	550.508		964.82		451.468	675.8				952.761		1007.97		660.968	840.45
		423.726	550.568		965.11		451.866	675.931				953.368		1009.35		660.985	840.603
		423.803	550.598		965.743		451.921	675.973				953.631		1010.54		661.411	841.191
		423.827	550.669		966.008		452.087	676.018				953.787		1010.7		661.544	841.641
		424.582	550.717		966.062		452.122	676.312				955.148		1012.12		661.991	841.678
		424.995	551.277		966.071		452.609	676.638				955.633		1012.19		662	842.434
		425.886	551.293		966.555		452.647	676.731				956.338		1012.8		662.348	842.563
		426.116	551.561		967.683		452.75	676.997				957.347		1013.12		663.036	843.438
		426.54	551.686		967.849		452.867	677.878				958.617		1013.72		663.759	844.272
		426.81	552.967		968.055		453.3	677.976				958.721		1016.19		664.591	845.103
		427.09	554.367		968.351		453.497	678.149				959.086		1016.2		664.711	846.525
		427.206	554.595		969.019		453.782	678.273				961.661		1016.26		664.805	847.613
		427.269	554.672		969.454		453.964	678.732				962.194		1016.77		665.424	847.629
		427.487	555.041		973.253		454.159	679.163				963.643		1019.52		665.583	847.981
		427.534	555.613		973.65		454.397	679.206				965.491		1020.03		665.701	848.274
		428.164	555.937		973.664		454.66	679.423				965.879		1020.25		666.147	848.554
		428.643	556.093		974.47		454.856	679.503				966.671		1021.07		666.389	848.662
		429.086	556.243		976.164		455.31	679.647				966.864		1021.62		666.476	848.869
		429.152	556.358		976.347		455.413	679.894				967.189		1024.49		666.532	849.148
		429.171	556.67		977.63		455.709	680.149				967.36		1025		666.584	849.229
		429.379	556.889		978.375		455.806	680.268				967.643		1027.02		666.636	849.835
		429.418	557.087		979.408		456.397	680.644				969.903		1027.72		667.684	849.966
		429.631	557.229		979.724		456.552	681.184				970.143		1027.97		668.326	850.182
		430.257	557.569		980.301		456.657	681.55				971.129		1028.1		668.341	851.021
		430.476	557.722		981.405		457.087	681.763				972.083		1028.51		669.216	851.03
		430.54	557.945		982.193		457.204	682.503				972.663		1029.02		669.29	851.153
		430.738	558.026		982.225		457.314	683.027				973.79		1030.4		669.464	851.398
		430.796	558.287		982.729		457.855	683.046				974.359		1031.74		669.595	851.661
		430.893	558.894		982.825		458.08	683.227				976.196		1033.17		669.919	852.26
		430.978	558.987		983.281		458.1	683.373				976.351		1033.8		670.31	852.34
		431.818	559.136		984.141		458.117	683.608				977.199		1034.11		670.386	852.844
		431.863	559.429		984.236		458.138	684.078				978.081		1035.97		670.835	852.911
		432.044	560.001		984.768		458.266	684.966				978.087		1036.66		670.88	853.056
		432.077	560.69		985.259		458.349	684.983				978.181		1036.77		671.635	853.325
		432.11	562.481		985.441		458.436	685.241				978.661		1037.46		672.548	853.509
		432.114	562.811		985.485		458.601	685.329				979.655		1040.06		672.652	853.611
		432.2	563.489		985.704		458.962	685.951				980.357		1041.47		672.761	855.167
		432.449	564.149		986.322		459.195	686.415				981.413		1043.81		672.765	855.529
		432.849	564.799		986.904		459.292	686.884				985.962		1043.87		672.807	856.513
		433.012	564.81		987.486		459.37	686.999				986.032		1044.35		673.141	857.696
		433.069	565.826		987.603		459.421	687.364				986.727		1045.24		673.841	858.185
		433.69	566.053		988.313		459.472	688.422				986.931		1051.4		673.979	858.56
		433.723	567.034		988.443		459.856	688.532				986.935		1052.04		674.557	858.631
		433.985	567.239		989.415		460.475	688.562				987.091		1052.46		674.59	859.177
		434.445	567.499		990.127		460.624	688.863				988.808		1052.79		675.055	859.732
		434.594	568.559		991.335		460.958	689.293				989.976		1055.05		675.542	860.269
		434.88	568.953		992.672		460.967	689.583				990.726		1055.05		675.72	860.364
		434.928	569.43		993.062		461.019	689.804				991.371		1055.4		675.894	860.552
		435.224	569.661		994.546		461.081	690.22				991.552		1056.23		676.169	860.859
		436.304	569.771		994.809		461.49	690.306				992.893		1057.14		676.308	861.094
		436.335	570.226		996.015		461.511	690.495				993.461		1057.27		676.39	861.148
		436.384	570.246		996.306		461.533	690.742				994.596		1057.4		676.725	861.527
		436.803	570.38		996.396		461.79	690.857				995.83		1060.82		677.479	861.912
		436.862	571.334		996.565		461.946	690.868				996.19		1061.09		677.601	862.027
		437.433	571.396		997.138		462.055	690.924				996.396		1061.71		677.77	862.157
		438.057	571.434		997.185		462.085	691.035				997.543		1064.16		678.33	863.673
		438.197	571.589		997.623		462.431	692.06				998.565		1065.39		679.556	864.184
		438.625	572.707		998.795		462.932	692.518				998.671		1065.61		681.279	864.298
		438.975	572.73		998.846		462.932	692.935				998.78		1066.28		681.4	864.699
		439.049	572.769		999.159		462.953	693.089				998.857		1069.91		681.466	864.782
		439.405	572.985		999.481		462.966	693.403				998.992		1070.23		681.719	864.838
		440.836	575.044		1000.82		463.587	693.744				999.048		1071.39		681.838	865.554
		441.263	575.489		1001.73		463.677	694.198				999.453		1071.75		681.952	865.732
		441.597	575.728		1001.93		463.983	694.508				1001.31		1072.32		682.663	866.244
		441.76	576.782		1002.53		464.371	694.527				1002.97		1078.82		683.034	866.59
		442.188	576.895		1003.44		464.992	694.909				1003.35		1079.32		683.396	866.924
		442.417	577.016		1003.75		466.291	695.012				1003.87		1079.42		683.704	866.997
		442.671	577.146		1004.33		466.808	695.192				1005.61		1080.02		683.758	867.034
		443.192	577.163		1004.72		466.898	695.281				1006.72		1080.86		683.794	867.86
		443.796	577.821		1005.19		466.9	695.302				1007.32		1081.18		684.276	868.17
		444.266	577.847		1006.51		466.994	695.616				1007.92		1081.75		684.353	868.289
		444.297	578.335		1006.59		467.039	695.867				1008.14		1081.9		684.814	869.021
		444.314	578.396		1006.76		467.289	697.628				1008.37		1082.55		685.482	869.839
		444.423	578.629		1008.19		467.435	697.692				1009.02		1082.84		685.79	870.548
		444.978	579.335		1008.53		467.58	698.201				1011.47		1083.5		686.666	871.563
		445.039	579.68		1010.3		467.662	698.311				1011.68		1085.64		686.781	871.724
		445.051	579.83		1010.3		468.146	698.755				1012.74		1087.52		687.124	873.068
		445.376	580.827		1011.46		468.413	698.951				1013.73		1092.77		687.196	873.362
		445.503	581.04		1011.62		468.578	699.283				1014.24		1092.8		687.356	873.607
		446.048	581.097		1012.3		468.84	699.874				1014.39		1096.81		687.721	874.064
		446.097	581.102		1012.63		468.889	699.97				1014.66		1097.01		688.057	874.382
		446.448	581.229		1013.36		469.174	700.077				1016.18		1098.03		688.112	874.562
		446.693	581.639		1014.45		469.178	700.42				1016.29		1098.49		688.271	874.873
		447.535	582.213		1016.43		469.368	700.627				1016.38		1100.53		688.273	875.05
		447.815	582.454		1017.02		469.606	701.025				1016.93		1100.99		689.305	875.103
		448.458	582.608		1017.83		469.886	701.505				1019		1102.37		689.64	875.184
		449.076	582.653		1018.38		469.981	701.624				1019.42		1104.73		689.767	875.278
		449.175	582.733		1019.1		470.335	701.913				1020.1		1106.25		690.827	875.489
		449.677	582.762		1021.26		470.363	703.184				1022.15		1106.85		690.97	875.88
		449.783	582.941		1021.43		470.907	703.479				1023.29		1108.06		691.642	876.023
		450.255	583.065		1021.92		471.159	704.27				1023.9		1108.32		691.799	876.284
		450.541	583.334		1021.93		471.401	704.723				1024.53		1109.34		691.857	876.561
		450.743	583.37		1023.22		471.458	705.372				1025.15		1111.04		692.506	876.629
		450.89	583.585		1023.36		471.923	705.415				1026.37		1112.29		692.722	876.81
		451.514	583.915		1023.89		472.489	705.607				1026.57		1112.47		693.781	877.376
		451.722	583.997		1025.78		472.748	706.468				1026.61		1113.5		694.189	877.503
		451.921	584.465		1025.97		472.824	706.701				1027.93		1113.61		694.21	877.844
		452.422	584.608		1026.86		473.176	706.802				1028.34		1116.36		694.602	877.946
		453.117	584.687		1027.28		473.387	706.963				1030.2		1118.08		694.867	880.79
		454.03	584.895		1028.86		473.709	707.137				1030.42		1118.61		695.291	881.231
		454.084	585.414		1030.56		473.911	707.382				1030.87		1119.27		695.812	881.469
		454.222	585.495		1030.64		474.563	707.455				1031.04		1121.12		695.859	881.472
		454.249	586.523		1030.74		474.637	708.09				1031.75		1123.15		695.943	881.606
		454.739	587.124		1031.29		474.687	708.403				1032.37		1123.68		696.172	882.024
		455.278	587.297		1031.84		474.81	709.322				1032.65		1124.22		696.497	882.087
		455.413	587.573		1032.22		474.967	709.513				1032.78		1125.28		696.76	882.864
		455.654	587.595		1032.67		475.427	709.837				1033.4		1126.33		696.786	882.949
		455.986	587.852		1032.75		475.447	710.116				1034.9		1126.93		696.841	883.171
		456.187	587.93		1034.01		475.509	710.328				1035.17		1131.05		697.093	883.743
		456.264	588.114		1034.11		475.569	710.535				1036.05		1131.76		697.2	884.19
		456.63	588.804		1035.05		475.598	710.661				1037.34		1133.06		697.713	884.743
		456.774	589.59		1035.6		476.885	710.965				1038.1		1133.46		697.999	884.915
		457.832	589.756		1035.99		476.888	711.031				1038.76		1135.84		698.841	886.036
		458.544	590.607		1036.91		477.137	711.296				1040.31		1143.22		699.15	886.493
		458.72	591.306		1038.69		477.338	711.381				1041.5		1148.16		699.81	886.503
		459.216	591.567		1038.84		477.45	711.537				1041.79		1148.56		700.456	886.894
		459.308	591.728		1039.08		477.475	712.502				1042.05		1149.22		700.488	888.065
		459.51	592.131		1039.18		477.524	712.724				1042.7		1149.26		700.586	888.132
		459.81	592.785		1040.92		477.528	712.892				1042.78		1150.66		700.864	888.212
		460.196	592.805		1042.75		477.684	713.079				1043.29		1151.67		702.465	888.406
		460.613	592.942		1042.88		477.701	713.358				1043.9		1153.91		702.553	888.455
		460.635	593.288		1043.02		478.145	713.955				1044.58		1154.52		703.009	889.807
		460.828	593.449		1044.01		478.363	714.662				1044.79		1154.59		703.033	890.092
		461.126	593.774		1044.18		478.785	714.748				1046.07		1155.32		703.1	891.82
		461.231	593.881		1044.39		479.127	714.762				1046.63		1155.36		703.51	892.373
		462.226	593.92		1044.58		479.372	715.042				1046.81		1157.55		703.557	893.24
		462.524	593.922		1044.66		479.855	715.042				1047.72		1160.06		703.881	893.403
		462.616	594.441		1044.92		479.995	716.275				1050.23		1161		704.365	893.595
		463.483	594.648		1045.11		480.72	716.979				1053.34		1161.69		704.411	893.882
		463.584	594.654		1045.71		480.762	717.069				1054.36		1163.81		704.527	894.958
		464.025	594.874		1046.69		481.607	717.176				1054.67		1164.92		706.446	895.009
		464.051	595.513		1046.85		481.784	717.519				1054.86		1165.69		707.531	895.911
		464.814	595.721		1047.55		481.835	717.653				1058.29		1166.37		708.6	897.623
		464.926	596.277		1048.22		481.937	718.276				1059.42		1167.83		708.736	897.853
		465.569	596.315		1049.18		482.32	718.447				1059.73		1167.88		709.5	899.154
		465.976	596.625		1049.93		482.423	718.95				1060.33		1168.26		709.643	899.487
		466.209	596.725		1050		482.577	719.168				1060.36		1170.02		709.76	899.672
		466.382	596.939		1050.02		482.652	719.239				1060.46		1170.15		709.829	899.772
		466.418	597.127		1050.1		482.84	719.46				1062.05		1173.84		710.057	900.303
		466.423	597.192		1050.18		482.921	719.667				1062.88		1174.15		710.132	900.683
		466.595	597.249		1051.98		483.004	719.832				1063.06		1174.22		710.418	900.779
		466.648	597.297		1053.2		483.202	719.975				1064.04		1174.24		710.753	900.884
		467.12	598.187		1053.59		483.551	719.975				1064.59		1175.28		710.837	901.014
		467.765	598.324		1054.84		483.606	720.074				1064.83		1175.65		711.744	901.073
		468.14	598.968		1054.85		483.786	720.753				1065.26		1177.55		712.237	901.661
		468.266	599.1		1055.72		483.931	721.209				1067.15		1178.37		712.51	901.712
		468.292	599.155		1055.81		484.124	721.322				1067.74		1178.72		712.568	902.981
		468.733	599.348		1055.98		484.747	721.393				1068.2		1179.32		713.417	903.052
		469.378	599.381		1056.81		484.836	721.491				1068.29		1180.58		713.45	903.232
		469.814	599.763		1056.98		484.949	721.839				1069.12		1180.6		713.709	903.428
		470.035	600.309		1058.92		484.987	721.952				1069.16		1180.95		714.451	903.714
		470.242	600.362		1060.8		484.989	722.045				1070.49		1181.64		714.794	904.026
		470.685	600.381		1062.83		485.118	722.157				1070.69		1181.94		715.229	905.076
		470.699	602.521		1064.63		485.96	722.631				1070.93		1182.91		715.235	905.217
		471.3	602.908		1064.67		486.536	723.42				1072.1		1184.08		715.769	905.272
		471.512	602.963		1064.72		486.905	723.824				1072.43		1184.44		716.21	905.556
		471.7	602.964		1066.15		487.191	724.328				1072.44		1186.62		716.448	905.791
		471.795	603.434		1066.16		487.254	724.334				1073.52		1187.48		716.528	906.808
		472.039	604.3		1066.26		488.027	724.864				1074.04		1188.16		716.572	907.845
		472.193	604.397		1066.64		488.257	725.012				1074.12		1188.72		716.978	908.035
		472.622	604.571		1068.65		488.563	725.121				1074.85		1189.99		717.047	908.817
		472.883	604.988		1069.04		490.101	725.554				1074.97		1192.11		717.107	908.831
		473.075	605.744		1069.65		490.113	726.072				1075.96		1193.12		717.144	908.981
		473.105	605.866		1069.88		490.257	726.367				1076.37		1193.47		717.845	909.188
		473.173	606.001		1070.15		490.401	726.465				1076.68		1196.56		718.811	910.119
		473.198	606.566		1070.53		490.638	726.784				1077.12		1197.43		718.964	910.258
		473.378	606.942		1070.71		490.716	726.841				1077.78		1201.63		719.077	910.533
		473.542	607.006		1070.93		490.759	727.135				1079.03		1201.69		719.192	910.841
		473.593	607.017		1071.25		490.938	727.18				1079.07		1202.41		719.215	911.089
		473.595	607.328		1071.78		491.705	727.605				1080.61		1203.24		719.454	911.107
		473.599	607.34		1072.9		491.979	727.663				1081.72		1204.13		719.541	911.194
		473.966	607.507		1075		492.347	728.37				1083.02		1204.79		720.69	911.328
		474.046	607.59		1075.45		492.539	728.927				1084.08		1205.84		720.698	911.36
		474.219	607.935		1075.8		492.605	728.928				1084.41		1207.55		720.791	911.746
		474.226	608.089		1077.05		492.747	729.662				1084.78		1207.78		720.877	913.159
		474.709	608.204		1077.26		492.764	729.766				1087.22		1208.66		720.96	913.19
		475.021	608.471		1080.96		492.966	729.867				1087.44		1212.96		721.062	913.859
		475.135	608.55		1083.53		493.68	729.932				1089.22		1220.27		721.08	914.39
		475.387	608.617		1083.87		493.8	730.097				1089.45		1221.22		721.66	914.484
		475.554	608.831		1085.42		494.327	730.483				1090.08		1221.28		721.725	914.522
		475.646	609.272		1085.92		494.899	730.495				1090.15		1221.74		722.125	915.218
		476.176	609.516		1086.42		495.107	730.785				1091.68		1225.08		722.333	915.53
		476.203	610.139		1086.54		495.184	730.97				1093.9		1225.14		722.589	915.549
		476.493	610.142		1087.22		495.231	731.134				1095.91		1225.23		723.2	915.831
		476.543	610.557		1089.01		495.706	731.187				1095.92		1226.76		723.266	916.66
		476.726	610.776		1090.83		496.039	731.324				1096.08		1228.1		723.592	916.788
		477.055	611.051		1090.97		496.859	731.373				1096.97		1228.71		723.651	917.055
		477.167	611.217		1091.43		496.909	731.598				1098.29		1232.2		723.669	917.463
		477.223	611.617		1092.26		497.13	732.02				1098.81		1233.82		723.995	917.551
		477.512	611.81		1094.37		497.961	732.028				1099.27		1234.29		724.586	918.679
		477.722	612.201		1094.87		498.417	732.334				1099.28		1234.65		725.209	919.348
		477.887	612.339		1095.06		498.529	732.881				1100.13		1235.42		725.548	919.452
		477.922	612.433		1095.17		498.739	732.957				1100.32		1236.17		726.78	919.516
		477.969	612.823		1095.48		499.072	733.088				1100.69		1236.19		726.816	919.9
		478.006	613.458		1095.81		499.433	733.531				1101.45		1237.01		727.015	922.004
		478.712	613.699		1096.08		499.683	733.573				1102.41		1237.13		727.542	922.202
		479.087	613.869		1096.34		499.722	734.033				1102.65		1238.2		728.058	922.575
		479.349	614.017		1096.39		499.896	734.27				1103.3		1238.97		728.591	922.872
		479.594	614.416		1096.98		500.192	734.744				1103.54		1239.44		729.245	922.906
		479.737	614.519		1097.44		500.203	734.964				1103.57		1246.41		729.488	923.377
		480.235	614.557		1097.67		501.112	735.039				1103.79		1247.61		729.802	923.4
		480.263	615.734		1098.22		501.113	735.165				1103.95		1247.72		730.498	924.55
		480.377	615.849		1098.34		501.545	735.418				1104.48		1248.72		730.886	924.671
		480.377	615.881		1098.74		501.562	735.439				1104.65		1251.24		731.196	924.903
		480.478	616.109		1098.88		501.604	735.976				1105.08		1251.33		731.51	925.424
		480.591	616.345		1099.45		502.623	737.048				1105.33		1252.97		731.696	925.466
		480.752	616.948		1099.59		502.997	737.249				1106.35		1253.39		731.877	925.504
		481.075	617.226		1099.69		503.319	737.373				1106.36		1257.91		732.561	925.771
		481.078	617.273		1099.93		503.351	738.293				1106.71		1260.11		733.187	926.622
		481.107	617.786		1100.03		503.619	738.586				1107.5		1261.95		733.257	926.77
		481.42	617.971		1100.34		503.877	738.622				1109.59		1262.65		733.355	926.887
		481.825	618.4		1101.46		504.335	738.739				1110.05		1264.4		733.472	927.364
		482.039	620.09		1102.56		504.461	738.868				1111.24		1264.86		733.582	927.4
		482.052	621.339		1102.62		504.474	739.584				1112.32		1265.88		734.212	927.449
		482.116	621.631		1102.66		504.657	739.659				1112.35		1266.54		734.267	928.665
		482.277	621.959		1102.86		504.669	739.932				1114.33		1268.87		734.312	928.861
		482.421	622.412		1102.87		504.736	740.109				1114.77		1270.23		734.674	928.971
		482.709	622.498		1103.14		504.745	740.178				1114.81		1270.41		734.918	929.634
		483.073	622.534		1105.8		505.161	740.44				1116.25		1272.74		735.847	930.519
		483.421	622.538		1106.17		505.226	741.402				1118.03		1274.21		736.213	930.778
		483.672	622.563		1107		505.589	741.461				1118.29		1276.14		736.327	931.299
		483.76	623.312		1107.36		505.708	741.527				1120.26		1276.96		736.427	932.398
		484.03	623.616		1107.68		506.22	742.335				1121.38		1276.99		736.593	932.532
		484.079	623.934		1107.93		506.56	742.391				1121.62		1277.51		736.618	933.105
		484.332	624.063		1108.34		506.682	742.619				1121.7		1280.42		736.928	933.55
		484.393	624.117		1108.98		506.69	742.743				1124.48		1283.52		737.232	934.021
		485.211	624.207		1109.17		506.907	742.823				1125.03		1286.56		737.399	934.052
		485.261	624.792		1109.84		507.029	743				1125.75		1287.95		737.866	934.699
		485.379	624.959		1110.65		507.115	743.191				1126.64		1288.73		737.937	934.77
		485.381	625.449		1111.87		507.61	743.197				1126.78		1290.38		738.332	934.849
		486.002	627.137		1112.07		507.765	743.229				1127.46		1292.85		738.756	935.34
		486.294	627.519		1113.11		507.802	743.497				1129.43		1294.46		738.782	935.388
		486.375	627.663		1113.41		508.306	743.789				1129.73		1294.59		739.006	935.991
		486.389	628.077		1113.47		508.645	743.897				1130.1		1294.92		739.008	936.036
		486.755	628.824		1113.71		508.983	744.043				1130.23		1298.13		739.553	936.64
		486.755	629.037		1115.85		509.198	744.16				1130.7		1298.31		740.32	936.894
		487.048	629.654		1119.58		509.293	744.585				1131.85		1302.57		740.676	937.667
		487.534	629.87		1120.02		509.749	744.601				1132.21		1306.6		740.916	938.022
		487.888	630.84		1121.18		509.926	744.733				1132.31		1307.88		741.137	938.354
		488.139	631.051		1121.34		510.019	745.081				1132.96		1311.32		741.901	939.073
		488.196	631.348		1121.44		510.074	745.378				1133.68		1314.07		742.104	939.578
		488.236	631.876		1121.49		510.329	745.922				1133.91		1314.34		742.456	940.109
		488.273	632.4		1123.48		510.566	746.384				1135.19		1318.77		742.615	940.11
		488.335	632.595		1124.07		510.625	747.095				1135.35		1319.24		742.832	941.155
		488.568	632.651		1125.42		511.01	747.248				1137.05		1319.82		742.993	941.438
		488.854	632.97		1126		511.322	748.196				1138.3		1324.27		743.4	941.886
		488.859	633.521		1126.93		511.785	748.5				1138.61		1325.57		743.469	942.463
		488.97	633.578		1127.17		511.833	748.938				1139.06		1332.6		743.524	942.914
		489.608	633.686		1129.08		511.845	749.058				1140.23		1332.67		743.582	943.2
		489.862	634.683		1129.1		512.243	749.258				1140.46		1336.16		744.253	943.35
		489.931	634.764		1129.13		512.546	750.087				1144.02		1337.49		744.283	943.371
		489.997	634.808		1129.34		512.572	750.978				1144.91		1339.78		744.742	943.375
		490.001	635.726		1129.45		512.58	751.526				1145.59		1340.34		745.921	943.518
		490.102	636.201		1129.87		512.667	751.556				1146.24		1345.76		745.935	944.745
		490.121	636.482		1129.98		512.723	752.218				1147.26		1346.17		746.669	945.007
		490.348	636.815		1131.02		512.952	752.319				1147.43		1351.05		747.415	945.149
		490.376	636.894		1131.13		513.065	752.9				1147.64		1354.26		748.602	945.599
		490.512	637.106		1131.21		513.4	752.923				1149.04		1357.18		748.796	945.8
		490.531	637.657		1131.58		513.42	753.676				1149.27		1358.35		749.848	945.928
		490.618	637.756		1131.94		513.59	753.709				1149.41		1364.1		750.007	946.117
		490.928	637.911		1132.2		513.72	753.744				1149.49		1364.63		750.119	946.417
		491.154	638.534		1134.7		513.825	754.144				1150.08		1366.86		750.272	946.44
		491.531	638.575		1135.61		514.33	754.157				1150.79		1377.45		750.606	946.632
		492.056	638.898		1136.38		515.078	754.364				1151.44		1386.95		751.465	946.748
		492.139	639.244		1137.25		515.506	754.46				1153.35		1387.77		751.669	946.983
		492.296	639.638		1137.67		515.683	754.475				1153.99		1388.39		753.523	947.66
		492.827	641.502		1138.71		515.795	755.819				1154.38		1393.78		753.574	947.911
		493.047	642.33		1138.82		515.938	756.066				1156.27		1395		754.414	949.395
		493.684	643.036		1139.4		516.233	756.124				1156.55		1397.97		754.544	949.451
		494.266	643.071		1140.75		516.279	756.445				1157.6		1399.85		755.12	949.602
		494.412	643.23		1142.37		516.767	756.667				1158.15		1404.74		755.297	950.111
		494.506	643.376		1142.4		517.421	756.676				1158.91		1412.9		755.524	950.264
		494.618	643.408		1143.23		517.447	757.021				1159.46		1415.27		756.368	951.083
		495.359	644.099		1143.99		517.517	757.266				1161.25		1420.57		756.7	951.393
		495.461	644.808		1144.66		517.636	758.237				1161.88		1421.65		756.962	951.537
		495.605	644.869		1146.06		517.668	758.301				1163.02		1423.44		757.108	951.858
		495.72	644.888		1146.3		518.086	758.696				1163.31		1436.23		757.343	952.354
		495.837	644.946		1146.41		518.394	759.621				1163.84		1437.44		757.578	952.447
		496.501	645.489		1146.68		518.665	760.408				1164.96		1439.5		757.892	952.687
		496.644	646.8		1149.83		518.811	760.529				1165.12		1445.99		758.933	953.401
		496.861	647.474		1150.11		519.109	760.563				1165.16		1451.71		759.123	954.026
		496.884	648.204		1150.46		519.463	760.591				1165.21		1457.5		759.444	954.336
		497.117	648.319		1151.93		519.831	760.763				1166.52		1461.68		759.698	954.518
		497.432	648.357		1152.13		519.839	760.815				1166.7		1462.91		760.289	955.092
		497.591	648.395		1155.63		520.538	761.366				1166.75		1466.02		760.503	955.154
		497.62	648.526		1155.86		520.573	761.708				1166.81		1466.85		760.761	955.266
		497.742	648.578		1156.32		520.652	762.012				1169.09		1469.31		761.041	956.336
		497.763	649.018		1157.01		521.37	762.074				1171.09		1470.08		761.049	956.503
		497.83	649.178		1157.69		521.474	762.597				1171.79		1475.18		761.335	957.849
		498.016	649.297		1157.89		522.013	763.203				1172.39		1477.74		761.847	958.382
		498.089	649.456		1158.14		522.283	763.722				1172.54		1482.78		761.892	958.83
		498.559	650.252		1158.63		522.737	763.831				1172.86		1483.84		762.24	958.949
		498.649	650.296		1158.72		523.228	764.117				1173.07		1484.02		762.351	959.578
		498.78	650.383		1159.42		523.41	764.197				1174.74		1501.23		762.523	960.417
		498.877	650.735		1159.74		523.692	764.484				1175.4		1508.7		763.015	960.726
		499.312	650.887		1160.94		524.129	764.512				1175.46		1513.94		763.244	960.97
		499.441	651.456		1161.03		524.853	764.801				1176.32		1527.46		763.512	961.01
		499.613	651.802		1163.04		524.902	765.264				1178.15		1527.95		764.117	961.048
		499.766	652.573		1163.34		525.243	765.527				1178.66		1543		764.489	961.074
		500.235	652.771		1164.08		525.403	765.596				1179.31		1574.44		764.606	961.436
		500.41	652.959		1164.44		525.445	766.07				1179.37		1612.76		766.164	961.59
		501.192	653.157		1164.71		525.708	767.972				1179.66		1613.35		766.263	961.77
		501.239	653.297		1165.62		526.684	768.075				1180.51		1642.89		766.62	962.158
		501.79	653.335		1165.62		527.473	768.077				1181		1646.54		766.902	964.063
		502.163	653.794		1167.9		528.358	768.501				1182.4		1659.41		767.236	964.433
		502.238	653.998		1168.06		528.763	768.893				1183.46		1662.31		767.533	964.731
		502.817	654.022		1168.68		528.975	768.949				1183.6		1664.62		768.666	964.994
		503.017	654.433		1169.08		528.99	768.975				1188.31		1685.69		769.029	965.383
		503.166	654.904		1169.69		529.651	769.711				1189.28		1686.36		769.06	965.668
		503.503	655.021		1173.53		529.983	769.853				1191.17		1692.38		769.603	966.245
		504.428	655.14		1174.59		530.2	770.416				1192.08		1742.16		769.834	966.659
		504.48	655.235		1176.5		530.394	771.012				1192.38		1766.06		770.284	967.266
		504.617	655.376		1176.85		531.342	771.012				1193.27		1767.41		770.648	968.137
		504.879	655.498		1178.69		531.36	771.838				1194.88		1824.23		770.854	969.66
		505.191	655.846		1178.89		531.508	771.849				1195.42		1852.77		770.982	970.127
		505.593	657.012		1179.55		531.761	771.973				1196.34		1928.32		771.813	970.201
		505.667	657.079		1180.58		531.864	772.117				1196.57		2092.75		772.101	971.121
		505.868	657.186		1181.53		531.981	772.341				1196.98				772.303	971.235
		506.136	657.277		1181.65		532.145	772.628				1197.08				772.626	971.557
		506.254	657.434		1181.65		532.336	772.844				1198.14				772.74	973.017
		506.366	658.135		1182.34		533.022	774.319				1198.14				772.799	973.101
		506.571	658.358		1182.37		533.149	774.442				1198.39				773.987	973.299
		506.785	658.398		1182.38		533.302	774.596				1198.75				774.267	973.51
		506.993	658.668		1182.7		533.633	774.699				1199.5				774.982	973.543
		507.068	658.88		1182.91		533.734	775.165				1199.88				775.27	974.46
		507.082	659.276		1183.36		533.89	775.383				1201.12				775.348	975.687
		507.168	659.298		1183.61		533.893	775.575				1203.28				775.397	975.702
		507.344	659.446		1185.56		533.951	775.772				1203.42				775.407	975.827
		507.364	659.655		1185.69		534.037	775.801				1203.42				776.128	975.904
		507.683	659.901		1188.89		534.751	776.17				1203.46				776.177	975.974
		507.751	660.063		1189.25		535.039	776.603				1204.54				776.251	976.428
		507.98	660.095		1189.34		535.128	776.639				1205.23				776.565	976.933
		508.502	660.441		1190.08		535.293	777.112				1205.46				776.659	978.307
		508.803	660.793		1190.77		535.964	777.376				1205.84				777.18	979.112
		508.9	661.171		1191.06		536.065	777.596				1207.37				777.321	979.367
		509.252	661.278		1191.41		536.416	777.694				1208.16				777.987	981.332
		509.501	661.447		1191.69		536.786	777.898				1209.44				778.976	981.437
		509.766	661.626		1195.41		536.881	778.389				1209.63				779.124	981.536
		509.85	661.666		1196.8		537.185	778.525				1210.38				779.124	981.812
		510.027	662.035		1197.27		537.341	778.988				1212.08				779.553	982.095
		510.08	663.074		1198.92		537.911	779.017				1212.12				779.615	982.245
		510.263	663.422		1199.5		537.98	779.086				1216.07				779.934	982.387
		510.991	663.644		1200.21		538.187	779.559				1217.18				779.976	982.704
		511.155	663.782		1201.54		538.375	779.663				1217.78				780.773	982.712
		512.058	663.879		1203.24		539.149	779.841				1219.97				781.061	982.748
		512.241	663.953		1207.61		539.294	780.062				1220.44				781.565	982.956
		512.453	664.165		1208.36		539.726	780.313				1221.29				781.966	983.122
		512.491	664.587		1208.84		539.76	780.321				1221.6				782.902	983.817
		512.644	664.686		1210.03		540.129	780.827				1224.62				783.047	983.891
		513.235	664.882		1210.96		540.263	781.426				1225.84				783.148	984.445
		513.247	664.964		1211.04		540.504	781.743				1226.04				783.442	985.456
		513.485	665.709		1211.43		540.529	782.355				1226.16				783.618	985.672
		513.565	665.792		1211.65		540.717	782.72				1227.43				783.699	985.996
		514.221	665.885		1212.32		540.742	782.912				1227.93				783.906	986.057
		514.26	666.526		1212.93		540.76	783.251				1228.04				783.982	986.574
		514.757	667.356		1214.31		541.203	783.298				1228.06				784.528	986.605
		514.787	667.795		1214.54		541.205	783.316				1228.69				785.144	986.872
		515.084	668.147		1215.33		541.272	783.898				1229.49				787.309	987.708
		515.089	668.214		1215.66		541.328	784.544				1231.14				787.31	987.73
		515.347	668.457		1215.88		541.748	785.009				1231.34				787.495	987.955
		515.403	668.662		1216.59		541.933	785.22				1231.86				787.623	988.217
		515.958	668.783		1216.59		541.997	785.295				1232.95				787.821	988.817
		516.187	669.434		1217.67		543.748	785.462				1233.32				787.905	990.161
		517.269	669.579		1219.74		543.957	785.53				1235.15				788.466	990.661
		517.785	669.667		1220.63		544.048	786.042				1235.68				788.766	990.69
		517.873	669.674		1222.77		544.293	786.219				1236.19				788.851	991.29
		517.893	669.861		1224.39		544.476	786.885				1236.71				788.949	991.42
		518.009	670.326		1224.77		545.197	787.164				1237.28				788.953	992.072
		518.163	670.789		1225.25		545.653	787.295				1239.14				789.038	992.54
		518.412	670.942		1226.85		545.726	787.405				1239.54				789.088	992.994
		518.634	671.219		1229.06		545.798	787.599				1241.49				789.112	993.114
		518.723	671.381		1233		545.997	788.093				1241.61				789.672	993.875
		518.771	671.621		1233.47		546.1	788.654				1242.58				789.824	993.899
		519.004	672.259		1234.82		546.122	788.788				1243.89				789.879	994.063
		519.662	672.475		1234.99		546.318	789.211				1243.92				790.058	994.851
		520.849	672.547		1237.19		546.541	789.522				1244.65				790.233	995.69
		521.063	673.783		1238.29		546.794	789.615				1245.1				790.843	995.986
		521.145	674.209		1238.64		546.976	789.738				1247.59				790.956	996.373
		521.19	674.373		1243.47		547.025	790.552				1252.87				791.552	997.006
		521.924	674.492		1244.31		547.613	790.675				1254.78				792.185	998.459
		521.971	675.128		1245.88		547.863	790.782				1254.85				792.584	999.584
		522.41	675.289		1249.02		548.087	791.026				1254.99				792.716	1000.09
		522.702	675.397		1250.71		548.382	791.25				1256.36				792.825	1000.67
		523.164	675.908		1251.39		548.383	791.847				1257.61				793.171	1001.08
		523.772	675.952		1252.99		548.522	791.92				1258.15				793.507	1001.13
		523.986	676.016		1253.18		548.568	791.954				1258.81				793.564	1001.43
		524.341	676.689		1253.87		548.879	792.08				1259.91				793.698	1001.78
		525.014	676.713		1254.67		549.104	792.556				1262.6				793.796	1002.44
		525.299	677.316		1256.61		549.285	792.612				1262.71				793.863	1002.6
		525.489	677.505		1259.16		549.638	792.684				1264.01				794.025	1003.13
		525.509	677.582		1259.65		550.105	792.736				1265.52				795.391	1003.36
		525.992	677.749		1261.78		550.461	792.831				1265.76				795.415	1003.58
		526.254	678.054		1262.21		550.873	792.994				1267.69				795.814	1003.96
		526.855	678.5		1266.17		551.006	793.076				1268.81				795.908	1003.98
		526.893	678.61		1266.35		551.017	793.269				1271.04				796.158	1004.41
		526.99	679.403		1266.4		551.842	793.436				1271.74				796.973	1004.51
		527.311	679.817		1266.88		552.583	793.489				1272.12				797.271	1005
		527.482	680.058		1268.1		552.768	793.511				1273.71				797.623	1005.34
		528.393	680.23		1269.55		552.769	793.718				1274.32				798.067	1005.75
		528.497	680.574		1269.96		552.878	793.864				1274.55				798.26	1006.06
		528.976	681.216		1272.07		553.246	793.972				1274.78				798.635	1006.16
		528.978	681.477		1272.67		553.308	794.135				1276.3				799.267	1006.51
		529.271	681.533		1275.59		553.329	794.219				1276.92				800.131	1007.11
		529.38	681.571		1276.38		553.526	794.245				1277.16				800.189	1007.32
		529.719	681.682		1277.62		553.804	794.384				1277.18				800.658	1007.72
		529.738	682.052		1279.4		554.874	794.408				1279.23				800.766	1008.49
		529.759	682.157		1279.9		554.878	794.469				1279.75				800.845	1009.91
		530.092	682.225		1280.44		555.64	794.921				1283.23				801.264	1010.87
		530.223	682.279		1284.04		556.075	795.021				1283.61				801.371	1011.86
		530.647	683.054		1284.92		556.287	795.374				1283.63				801.679	1011.88
		530.84	683.122		1285.36		556.825	795.415				1285.11				801.845	1012.38
		530.862	683.209		1285.96		557.186	795.663				1286.32				801.915	1012.44
		531.088	683.285		1286.81		557.318	795.792				1286.73				802.962	1012.73
		531.104	683.34		1290.11		557.992	796.112				1288.5				803.983	1013.11
		531.474	684.34		1290.51		558.053	796.586				1288.99				804.832	1013.16
		532.529	684.703		1294.2		558.088	796.699				1289.36				805.047	1013.36
		532.574	684.703		1296.29		558.261	796.748				1289.52				805.496	1014.66
		532.849	684.729		1298.83		558.652	796.917				1290.16				805.961	1014.73
		532.87	684.804		1300.48		558.737	796.944				1290.34				806.792	1015.96
		533.125	685.023		1300.84		558.806	797.572				1290.54				806.818	1016.11
		533.158	685.518		1302.37		558.98	797.791				1291.74				807.039	1016.97
		533.634	685.569		1302.71		559.118	797.854				1293.02				807.051	1018.22
		534.49	685.757		1306.18		559.418	797.885				1293.22				807.273	1018.91
		534.638	685.782		1307.56		560.021	797.897				1295.7				807.428	1019.31
		534.817	686.017		1307.82		560.564	797.978				1295.86				807.474	1019.73
		535.464	686.278		1308.73		560.635	798.414				1296.82				807.705	1019.76
		535.58	686.436		1311.26		560.638	798.776				1297.2				807.751	1019.89
		535.758	687.03		1317.21		561.081	798.843				1297.52				807.832	1020.92
		536.279	687.56		1317.93		561.172	798.942				1298				808.318	1021.02
		536.299	687.794		1319.58		561.391	799.009				1300.74				808.735	1021.06
		536.553	688.18		1319.86		561.566	799.327				1302.25				809.086	1021.11
		536.599	688.84		1323.3		561.943	799.874				1302.43				809.484	1022.04
		537.269	688.941		1324.1		562.53	800.408				1303.83				810.418	1022.05
		538.455	689.186		1324.67		562.689	800.538				1304.04				810.705	1022.16
		538.663	689.197		1325.9		563.225	800.651				1304.8				810.791	1022.62
		538.678	689.316		1328.14		563.379	800.68				1305.46				812.017	1023.42
		538.803	689.652		1328.78		563.451	800.705				1306				812.103	1024.11
		538.973	690.518		1329.3		563.55	801.102				1312.86				812.262	1024.45
		539.448	690.738		1333.8		564.039	801.411				1314.92				812.319	1024.64
		539.506	690.807		1334.28		564.414	801.597				1317.95				812.532	1024.76
		539.63	691.085		1334.42		564.495	801.693				1319.43				812.617	1025.35
		540.172	691.111		1339.18		564.751	801.985				1320.42				813.405	1026.08
		540.402	691.245		1341.41		565.111	802.139				1321.49				813.719	1026.34
		540.55	691.337		1343.02		565.343	804.246				1322.39				813.758	1026.78
		541.079	691.396		1343.43		565.954	804.634				1324.5				813.768	1027.15
		541.248	691.546		1343.99		565.983	804.673				1326.15				814.354	1027.25
		541.487	691.551		1345.7		566.666	804.881				1326.2				814.818	1027.79
		541.643	691.817		1349.78		566.682	805.561				1326.39				815.131	1028.31
		541.687	692.083		1354.42		567.063	805.644				1327.57				815.168	1028.48
		541.707	693.761		1355.07		567.734	806.017				1327.66				815.641	1029.09
		541.766	694.184		1357.21		567.747	806.883				1327.78				815.667	1029.89
		541.779	694.356		1358.7		568.332	807.112				1327.92				815.898	1030.6
		541.811	694.671		1359.26		568.346	807.743				1328.04				815.987	1030.65
		542.013	695.057		1364.6		568.441	807.864				1330.44				816.363	1031
		542.129	695.162		1367.23		568.532	807.867				1332.57				816.419	1031.06
		543.451	695.168		1367.63		568.994	808.034				1334.04				816.429	1031.5
		543.648	695.19		1371.47		569.247	808.276				1335.12				816.542	1032.37
		544.149	695.211		1372.48		569.492	809.169				1337.1				816.625	1033.23
		544.17	695.385		1373.52		569.813	809.242				1338.25				817.004	1033.52
		544.183	695.428		1376.14		569.872	810.116				1339.31				817.171	1033.67
		544.524	695.487		1381.75		570.086	810.715				1340.57				817.711	1034.94
		544.585	695.548		1384.48		570.088	811.107				1344				817.989	1035.38
		544.595	695.892		1384.68		570.407	811.251				1344.65				818.068	1035.98
		544.819	696.164		1386.09		570.668	811.692				1344.72				818.334	1036.44
		544.87	696.273		1389.64		570.71	812.639				1345.18				818.628	1036.51
		545.127	696.482		1390.66		570.711	812.663				1345.97				818.837	1036.71
		545.314	696.684		1392.84		570.956	812.791				1347.97				819.508	1036.9
		545.406	696.845		1393.94		570.99	813.329				1348.71				820.362	1038.2
		545.439	697.791		1394.15		571.145	813.404				1349.43				820.757	1038.28
		545.54	697.869		1399.75		571.172	813.469				1351.61				820.854	1038.4
		545.719	697.969		1400.18		571.247	813.654				1351.68				820.989	1038.76
		545.796	697.999		1403.55		571.326	813.703				1352.29				821.02	1039.22
		545.838	698.293		1408.42		571.446	813.728				1352.76				821.082	1039.41
		545.902	698.57		1414.95		571.574	813.995				1353.12				821.196	1040.36
		545.973	698.981		1416		572.09	814.001				1353.44				821.675	1040.96
		546.083	699.332		1419.02		572.738	814.4				1355.08				822.092	1041.14
		546.137	699.378		1422.05		573.123	814.787				1355.37				822.824	1041.45
		546.313	699.835		1423.82		573.155	815.059				1357.53				822.861	1041.49
		546.783	700.41		1425.85		573.164	815.279				1359.7				822.966	1041.71
		547.396	700.594		1427.29		573.79	815.281				1360.04				823.014	1041.75
		547.482	701.521		1431.87		574.228	815.303				1361.64				823.631	1041.9
		547.52	701.571		1433.3		574.776	815.538				1364.03				823.908	1042.01
		547.612	701.779		1434.75		575.376	815.722				1365.75				824.23	1042.16
		547.624	702.614		1438.82		575.661	815.769				1366.33				824.606	1042.3
		548.239	703.126		1441.88		575.988	815.925				1367.56				824.78	1043.04
		548.468	703.38		1447.93		576.087	815.984				1367.81				824.845	1043.41
		548.634	703.415		1450.25		576.25	816.16				1369.9				824.946	1043.61
		548.636	703.617		1450.35		576.425	816.255				1370.59				825.027	1044.02
		549.115	703.69		1453.51		576.681	816.444				1371.59				825.175	1044.95
		549.133	703.69		1455.74		577.246	816.471				1372.19				825.241	1045.4
		549.307	704.661		1455.94		577.248	816.549				1374.91				825.885	1046.62
		549.6	704.846		1458.41		577.95	816.66				1375.51				825.905	1046.92
		549.913	705.06		1459.27		578.15	816.782				1377.43				825.937	1047.08
		550.402	705.067		1459.36		578.296	816.799				1378.91				826.343	1047.24
		551.025	705.104		1464.31		578.477	817.566				1379.32				826.4	1048.35
		551.088	705.13		1464.52		580.103	817.663				1383.82				827.002	1048.95
		551.177	705.138		1464.63		580.251	817.715				1384.86				827.221	1049.71
		551.258	705.469		1466.13		581.039	817.958				1384.92				827.742	1050.85
		551.465	706.075		1468.11		581.348	818.116				1384.94				827.844	1051.44
		551.511	706.637		1468.26		581.523	818.147				1385.01				828.677	1051.71
		551.79	706.786		1475.15		581.999	818.333				1385.45				828.793	1051.98
		551.938	706.947		1476.16		582.281	818.489				1387.45				829.104	1053.43
		552.179	706.981		1482.75		582.524	818.513				1388.19				829.986	1053.83
		552.612	707.224		1483.15		583.057	818.778				1393.61				830.47	1053.98
		552.994	707.334		1485.14		583.179	818.905				1393.77				830.493	1054.04
		553.112	707.877		1487.57		583.207	819.163				1393.93				830.555	1054.12
		553.61	708.025		1490.91		583.257	819.212				1394.24				831.404	1055.5
		553.622	708.553		1496.97		583.666	819.558				1394.72				831.443	1055.83
		554.159	708.794		1497.19		583.765	819.882				1394.99				831.98	1055.83
		554.198	709.23		1497.63		583.895	819.931				1396.59				832.12	1055.85
		554.321	710.036		1497.67		583.907	820.081				1397.87				832.492	1055.94
		554.534	710.046		1498.97		584.063	820.227				1398.74				833.534	1055.97
		554.595	710.315		1500.9		584.137	820.439				1399.35				834.019	1056.46
		554.684	710.473		1501.32		584.172	820.464				1403.01				834.055	1056.73
		554.777	710.689		1501.76		584.341	820.776				1403.12				834.114	1056.88
		555.217	710.772		1504.91		584.57	821.145				1404				834.347	1056.96
		555.396	711.505		1506.16		584.654	821.367				1404.67				834.474	1057
		555.449	711.662		1515.76		584.707	821.383				1405.2				834.97	1057.01
		555.651	712.446		1518.26		584.778	821.704				1405.52				835.554	1057.07
		555.74	712.827		1519.56		584.813	822.457				1406.61				835.867	1057.22
		556.197	712.964		1519.85		585.1	822.53				1407.12				836.216	1057.67
		556.197	713.004		1528.69		585.884	822.667				1409.86				837.195	1057.7
		556.263	713.259		1532.53		586.165	822.855				1410.42				837.332	1057.93
		556.477	713.501		1532.91		586.317	823.092				1411.43				837.451	1058.98
		556.541	713.519		1533.23		586.429	824.013				1411.44				837.694	1059.2
		556.681	713.612		1536.32		586.535	824.543				1413.6				837.722	1059.41
		556.833	713.639		1537.09		586.624	824.723				1415.57				838.199	1059.54
		556.843	713.83		1538.11		587.09	824.883				1416.69				838.239	1059.68
		558.326	713.916		1541.33		587.295	824.908				1417.94				838.257	1059.82
		558.355	714.368		1541.51		587.871	824.994				1419.84				838.286	1061.24
		558.356	714.604		1549.6		587.917	825.803				1420.67				838.329	1061.38
		558.629	714.93		1550.51		588.016	825.976				1423.3				838.443	1061.63
		559.365	715.016		1550.89		588.15	826.544				1423.63				838.756	1062.3
		559.461	715.261		1552.38		588.163	827.451				1424.07				839.017	1063.14
		559.73	715.263		1557.8		588.518	827.825				1424.41				839.102	1063.18
		560.103	715.386		1559.21		588.527	827.871				1425.27				839.108	1063.68
		560.243	715.794		1562.56		588.833	828.154				1426.81				839.208	1064.37
		560.417	716.25		1568.08		589.526	828.159				1427.33				839.813	1064.4
		560.454	716.36		1568.46		590.619	828.331				1428.62				839.853	1064.53
		560.84	716.414		1570.54		591.146	828.446				1429.71				839.998	1064.86
		560.974	716.654		1574.38		591.19	828.458				1429.87				840.464	1064.96
		561.338	716.7		1586.43		591.339	828.809				1429.99				840.796	1064.99
		561.389	716.724		1590.59		591.486	829.324				1434.39				840.925	1066.81
		561.59	717.045		1594.9		591.671	829.4				1434.83				841.773	1067.72
		561.977	717.22		1606.5		591.924	829.413				1435.16				841.959	1067.87
		562.042	717.53		1613.59		592.018	829.479				1435.41				842.02	1068.41
		562.138	717.913		1620.22		592.16	829.521				1437.31				842.078	1068.62
		562.458	718		1630.23		592.796	829.528				1437.37				842.217	1068.82
		562.51	718.268		1644.67		592.994	829.62				1438.06				842.619	1068.86
		562.87	718.281		1658.17		593.068	829.926				1446.03				843.054	1069.13
		563.245	718.408		1695.98		593.927	830.824				1446.9				843.476	1069.21
		563.413	718.73		1697.48		594.127	831.702				1450.7				843.591	1070.38
		563.506	718.795		1723.53		594.317	831.779				1452				843.753	1070.83
		563.574	718.849		1732.64		595.616	832.125				1452.79				844.172	1070.94
		563.655	719.095		1768.31		596.368	832.408				1454.6				844.371	1071.51
		563.67	719.506		1771.72		596.594	832.424				1456.79				845.047	1072.29
		563.919	719.543		1780.1		597.079	832.69				1459.78				845.065	1072.73
		564.003	719.629		1784.87		597.366	832.852				1466.44				845.785	1072.94
		564.06	720.371		1790.97		597.414	833.438				1468.03				846.029	1072.96
		564.677	720.665		1797.07		597.47	833.581				1468.76				846.082	1073.1
		565.024	720.68		1834.26		597.795	834.063				1471.4				847.434	1073.26
		565.177	720.695		1873.8		598.373	834.133				1473.91				847.46	1075.33
		565.384	721.269		1895.45		598.525	834.484				1474.79				847.488	1077.27
		565.655	721.409		1951.09		599.962	835.332				1474.89				847.496	1077.32
		565.825	721.81				600.514	835.381				1475.27				847.749	1077.48
		566.058	721.864				600.817	835.395				1476.14				847.937	1077.56
		566.092	722.215				600.941	835.735				1478.18				847.963	1077.87
		566.209	722.532				600.957	836.349				1478.87				848.296	1079.02
		566.271	722.669				600.961	836.391				1479.89				848.682	1079.53
		566.316	722.865				601.012	836.688				1479.97				849.113	1079.69
		566.346	723.72				601.063	836.73				1480.03				849.852	1079.86
		566.998	723.79				601.31	837.212				1483				850.017	1080.14
		567.378	723.95				601.426	837.319				1488.62				850.107	1080.66
		567.408	724.111				601.875	837.37				1494.66				850.266	1080.97
		567.415	724.479				602.248	838.522				1498.86				850.517	1082.1
		567.547	724.872				602.446	838.758				1498.91				850.974	1082.34
		567.954	724.989				602.544	838.954				1503.64				851.165	1082.92
		568.274	725.092				602.681	839.176				1505.62				851.25	1082.99
		568.562	725.523				602.739	839.296				1508.38				851.407	1083.41
		568.702	725.697				602.866	839.329				1509.46				852.293	1083.61
		568.768	725.734				603.21	839.748				1510.22				852.484	1083.61
		568.892	726.294				603.27	839.796				1511.77				852.491	1084.14
		568.962	726.3				603.815	839.902				1513.53				852.611	1084.18
		569.213	726.459				603.963	839.954				1517.36				852.967	1084.68
		569.234	726.939				604.792	839.959				1518.9				853.328	1085.04
		569.248	727.173				605.035	839.991				1519.81				853.513	1085.84
		569.348	727.182				605.476	840.587				1524.65				853.656	1086.02
		569.459	727.735				606.02	840.697				1527.23				853.763	1086.4
		569.495	727.793				606.029	840.797				1527.29				853.803	1087.13
		569.637	728.398				606.426	840.867				1528.43				854.04	1087.22
		569.674	728.96				606.5	840.923				1528.92				855.168	1087.45
		569.767	729.27				606.74	841.053				1530.24				855.289	1088.11
		570.311	729.315				606.961	841.24				1531				855.35	1088.33
		570.328	729.521				606.963	841.305				1531.63				855.651	1089.22
		570.372	729.598				606.969	841.835				1533.51				855.897	1089.36
		570.407	729.632				606.999	842.029				1533.98				855.915	1089.82
		570.621	729.901				607.078	842.446				1535.38				856.478	1090.23
		570.774	730.114				607.336	842.697				1535.78				856.578	1090.33
		570.982	730.134				607.365	842.907				1536.12				856.655	1090.48
		571.002	730.791				607.378	843.033				1542.92				857.48	1090.48
		571.701	730.857				608.169	843.518				1542.98				858.448	1092.35
		572.03	731.229				608.435	844.328				1549.59				858.474	1092.36
		572.089	731.252				608.585	844.789				1556.12				858.513	1092.42
		572.211	731.258				609.098	844.923				1558.43				858.598	1094.32
		572.238	731.507				609.268	845.051				1561.21				858.704	1095.08
		572.365	732.16				609.314	845.063				1564.03				859.356	1095.27
		573.02	732.373				609.462	846.281				1565.76				859.58	1095.3
		573.217	732.445				609.518	846.387				1569.1				859.959	1095.9
		573.329	732.492				610.372	846.498				1574.29				860.037	1097.76
		573.401	733.338				610.499	846.783				1581.98				860.224	1098.01
		573.555	733.459				611.183	846.821				1583.01				860.361	1098.12
		573.631	733.633				611.495	846.963				1586.88				860.817	1098.47
		574.205	733.755				611.648	847.491				1588.36				860.9	1098.91
		574.247	734.142				612.176	847.636				1591.78				861.677	1101.6
		574.25	734.406				612.797	848.714				1593.45				861.904	1101.76
		574.591	734.79				613.208	848.827				1594.65				862.661	1101.9
		574.818	734.975				613.39	848.952				1595.37				863.555	1102.71
		574.895	735.117				613.878	849.204				1596.23				863.669	1103.08
		574.915	735.405				613.931	849.389				1600.2				864.455	1103.14
		575.476	735.699				613.998	849.448				1607.41				864.669	1103.59
		575.6	735.866				614.519	849.622				1609.67				864.829	1103.64
		575.63	736.063				615.185	849.836				1610.06				864.891	1103.7
		575.828	736.442				615.213	850.162				1612.07				865.364	1103.8
		576.656	737.059				616.299	850.274				1615.83				865.648	1104.29
		576.675	737.08				616.327	850.548				1617.26				865.704	1104.42
		576.797	737.107				616.395	850.569				1626.31				865.71	1105.07
		576.998	737.413				616.58	850.754				1631.73				866.254	1105.32
		577.097	737.602				617.303	850.926				1632.42				866.347	1105.65
		577.22	737.693				617.582	851.155				1634.41				866.415	1106.15
		577.229	738.088				618.005	851.245				1634.66				866.788	1106.22
		577.28	738.248				618.215	851.383				1635.83				867.022	1106.52
		577.374	738.464				618.334	851.667				1636.25				867.79	1106.58
		577.446	738.735				618.446	851.921				1638.08				868.14	1106.63
		577.673	738.901				618.495	852.019				1642.07				868.36	1107.18
		577.799	739.02				619.832	852.112				1647.76				868.489	1107.19
		577.863	739.268				620.842	852.131				1653.58				868.503	1107.91
		578.126	739.364				620.979	852.664				1654.75				869.579	1108.2
		578.174	739.652				620.992	853.624				1658.15				869.649	1109.43
		578.278	739.705				621.018	853.658				1667.76				869.656	1109.57
		578.679	740.41				621.308	853.841				1673.47				869.686	1110.76
		579.174	740.552				621.379	853.991				1680.98				869.887	1111.17
		579.298	740.867				621.906	854.154				1711.28				870.089	1111.49
		579.553	740.978				622.12	854.403				1717.59				870.54	1111.57
		579.642	741.115				622.138	854.859				1734.63				870.824	1111.78
		580.153	741.143				622.407	854.881				1743.92				870.88	1112.52
		580.327	741.379				622.665	855.977				1751.01				871.158	1112.65
		580.657	741.914				622.983	856.802				1752.62				871.432	1112.74
		580.752	742.11				623.465	857.016				1753.05				871.493	1113.03
		580.863	742.142				623.507	857.103				1767.93				872.107	1113.13
		581.117	742.191				623.533	857.716				1775.95				872.271	1113.31
		581.227	742.661				623.74	858.141				1779.31				872.359	1114.32
		581.383	742.688				623.851	858.391				1779.79				872.569	1114.75
		582.124	743.325				623.883	858.633				1782.86				872.606	1114.92
		582.262	743.683				625.478	858.777				1783.95				873.136	1116.22
		582.268	743.909				625.584	859.162				1809.28				873.415	1116.26
		582.575	744.521				626.675	859.516				1817.15				873.647	1117.51
		582.648	744.563				626.735	860.174				1824.27				873.779	1117.53
		582.815	744.624				627.37	860.232				1862.61				873.985	1120.91
		582.92	745.005				627.97	860.585				1867.74				874.094	1121.57
		583.006	745.177				628.129	860.638				1874.59				874.517	1122.38
		583.327	746.188				628.163	861.054				1894.99				874.526	1123.61
		583.339	746.353				628.652	861.246				1903.67				875.18	1123.64
		583.339	746.546				628.685	861.432				1906.39				875.305	1124.14
		583.684	746.822				629.344	861.551				1916.56				875.902	1124.78
		583.797	746.924				629.348	861.939				1956.13				876.021	1124.79
		583.911	747.112				629.393	862.204				1977.81				876.169	1125.1
		584.185	747.138				629.506	862.797				2022.66				876.532	1125.68
		584.42	747.265				629.582	862.923				2144.63				876.833	1125.85
		584.607	747.341				629.823	862.954								877.231	1126
		584.622	747.687				629.842	863.024								877.812	1126.2
		585.155	747.846				629.905	863.646								877.929	1126.69
		585.761	747.908				630.077	863.688								878.482	1127.22
		585.866	747.956				630.222	863.883								878.512	1127.86
		586.492	748.485				630.431	864.339								879.032	1129.26
		586.823	748.861				630.665	864.349								879.588	1129.88
		586.823	749.086				630.982	864.576								879.686	1130.04
		587.036	749.365				631.332	864.713								879.79	1130.36
		587.168	749.455				631.468	864.812								879.87	1131.16
		587.706	749.762				631.836	864.836								880.374	1131.42
		587.723	749.941				632.519	864.985								880.519	1131.85
		587.814	750.212				632.654	864.988								880.626	1131.91
		588.115	750.241				633.028	865.053								880.692	1131.96
		588.434	750.329				633.29	865.209								880.813	1131.98
		588.471	750.448				633.691	865.325								881.117	1132.78
		588.583	750.778				634.218	865.328								881.239	1133.09
		588.761	750.931				634.341	865.33								881.469	1133.41
		589.581	751.076				635.089	865.403								881.624	1134.58
		589.92	751.395				635.407	866.063								882.082	1136.34
		590.641	751.412				635.451	866.506								882.93	1137.55
		590.992	751.457				635.656	867.146								883.101	1137.65
		591.27	751.775				636.389	867.675								883.217	1138.16
		591.271	751.861				636.525	868.078								883.706	1139.02
		591.793	752.49				636.539	868.232								883.927	1139.19
		591.942	753.219				636.654	868.556								884.467	1139.76
		591.982	753.226				637.101	868.65								884.7	1140.67
		592.1	753.349				637.812	868.888								884.727	1140.71
		592.203	753.408				638.15	869.148								884.776	1140.93
		592.298	753.465				638.685	869.428								885.416	1141.73
		592.486	753.688				638.936	869.469								885.477	1141.78
		592.567	753.962				639.305	869.526								885.577	1142.25
		592.875	754.082				639.432	869.991								885.998	1142.9
		593.087	754.141				639.814	870.078								886.123	1143.37
		593.284	754.151				640.591	870.139								886.438	1143.63
		593.468	754.157				640.816	870.477								887.261	1144.58
		593.57	754.372				641.313	870.721								887.354	1145.6
		593.823	754.596				641.737	870.737								887.489	1146
		594.032	754.845				642.34	870.779								887.493	1146
		594.726	755.14				642.746	871.022								887.822	1146.06
		594.953	755.215				642.883	871.19								888.45	1146.3
		595	755.362				642.943	871.356								888.502	1146.4
		595.145	755.414				643.047	871.411								888.594	1147.01
		595.2	755.525				643.355	871.95								889.194	1147.77
		595.316	755.538				643.423	872.115								889.298	1148.13
		595.56	755.64				643.596	872.231								889.721	1148.26
		595.605	755.722				643.683	872.236								890.083	1148.7
		595.714	755.917				643.827	872.689								890.115	1149.08
		595.716	755.947				643.962	872.845								890.277	1149.67
		595.855	756.931				644.014	873.165								890.895	1149.68
		596.037	757.148				644.121	873.252								891.352	1150.16
		596.312	757.634				644.459	873.678								891.428	1150.86
		596.43	758.509				644.552	874.071								891.432	1150.89
		596.541	758.783				644.655	874.402								892.35	1151.14
		596.584	758.809				644.773	875.574								892.543	1151.29
		596.81	759.557				644.87	875.642								892.744	1152.71
		596.961	759.721				645.705	876.248								892.784	1152.9
		597.089	760.081				646.124	876.497								893.561	1153.07
		597.131	760.098				646.367	877.143								894.396	1153.29
		597.358	760.139				647.564	877.263								894.908	1154.69
		597.469	760.268				647.719	877.664								894.911	1156.48
		597.572	760.483				647.846	877.684								895.035	1157.93
		597.818	760.485				648.023	878.023								895.491	1158.17
		598.04	760.976				648.029	878.219								895.521	1158.73
		598.215	761.282				648.157	878.278								896.052	1158.95
		598.44	761.297				648.547	878.376								896.405	1159.4
		598.675	761.576				648.612	878.4								896.724	1159.78
		598.679	761.672				648.724	878.81								896.766	1159.83
		598.873	761.673				649.402	879.119								896.873	1160.64
		598.889	761.712				649.648	879.428								897.488	1161.03
		599.487	762.046				650.018	879.654								897.741	1161.31
		599.514	762.143				650.039	879.657								898.017	1161.46
		599.806	762.27				650.173	879.937								899.109	1161.51
		600.286	762.5				650.432	879.954								899.268	1162.09
		600.511	762.782				650.467	880.136								899.45	1162.78
		601.063	762.919				650.581	880.157								900.105	1163.34
		601.598	763.784				650.586	880.188								900.111	1165.19
		601.705	764.087				650.768	880.265								900.553	1165.4
		601.824	764.192				651.146	880.365								900.699	1165.48
		601.909	764.264				651.685	880.6								901.198	1165.83
		601.954	764.437				651.797	880.666								901.399	1166.2
		602.177	764.838				651.942	880.748								901.797	1166.38
		602.38	765.039				652.848	881.102								901.912	1166.83
		603.566	765.107				652.985	881.377								901.923	1167.44
		603.678	765.154				653.014	881.676								901.95	1167.46
		603.752	765.525				653.856	881.71								902.513	1168.17
		603.906	765.765				654.653	882.084								902.557	1168.22
		603.91	765.903				654.919	882.408								902.856	1168.49
		604.01	765.954				655.722	882.466								903.285	1168.49
		604.251	765.966				655.844	882.483								903.44	1168.63
		604.471	766.285				656.844	882.733								903.755	1168.63
		604.512	767.571				657.069	883.206								904.257	1168.79
		604.802	767.93				657.337	883.399								904.508	1169.06
		605.175	768.001				657.473	883.618								904.831	1169.07
		605.358	768.764				658.134	883.687								905.074	1170
		605.681	768.795				658.332	883.713								905.317	1170.25
		606.254	768.851				658.733	883.912								905.626	1172.14
		606.275	769.025				658.969	884.231								905.712	1172.75
		607.065	769.102				658.993	884.998								905.795	1173.07
		607.196	769.208				659.446	885.434								906.033	1174.05
		607.354	769.284				659.944	885.488								906.149	1174.81
		607.493	769.569				660	885.795								906.224	1175.25
		607.723	769.825				660.382	885.946								906.273	1175.57
		607.764	769.908				660.462	886.201								906.362	1175.85
		607.859	770.116				660.506	886.479								906.679	1177.09
		608.199	770.804				660.616	887.351								906.827	1177.48
		608.698	770.956				660.83	887.36								906.904	1177.49
		608.959	771.251				661.526	887.962								907.233	1178.44
		608.97	771.589				661.626	888.366								907.636	1178.95
		609.233	771.664				662.121	888.649								907.74	1179.59
		609.485	771.86				662.249	888.932								907.897	1179.86
		610.658	772.101				662.52	890.271								908.029	1180.56
		610.751	772.3				662.989	890.31								908.466	1180.6
		610.881	772.727				663.054	890.771								908.587	1181.69
		611.103	772.743				663.63	890.91								908.875	1182.05
		611.569	772.841				663.997	891.302								909.346	1182.83
		612.59	772.892				664.141	891.335								909.542	1183.15
		612.596	773.109				664.32	891.603								909.583	1184.88
		612.779	773.707				664.62	892.059								909.825	1185.03
		612.907	774.509				664.732	892.248								910.16	1187.32
		612.934	774.614				664.898	892.379								910.603	1187.74
		613.115	774.676				665.436	892.832								910.842	1187.99
		613.253	774.733				665.501	892.97								911.467	1188.18
		613.353	774.826				665.592	893.334								911.77	1189.02
		613.576	774.937				665.644	893.919								911.881	1189.56
		613.96	775.129				665.916	894.248								912.391	1189.7
		614.437	775.23				666.247	894.262								912.618	1191.01
		614.512	775.264				666.786	894.328								912.673	1192.76
		615.217	775.286				666.863	894.493								912.674	1194.86
		615.365	776.243				666.865	894.534								912.729	1195.24
		615.642	776.407				667.197	894.539								912.829	1197.42
		615.668	776.932				667.299	894.776								913.039	1197.57
		615.694	777.104				667.642	894.905								913.693	1197.78
		615.795	777.119				668.244	895.454								914.013	1197.93
		615.816	777.206				668.354	896.25								914.877	1198.24
		616.188	777.52				669.2	896.571								915.016	1199.22
		617.272	777.585				669.914	896.931								915.646	1199.38
		617.337	777.684				671.158	896.996								915.918	1199.51
		617.542	778.186				671.229	897.054								916.492	1199.65
		617.667	778.399				671.483	897.063								917.233	1199.93
		617.677	778.489				672.729	897.556								918.34	1200.19
		618.041	778.509				672.802	898.233								918.98	1200.82
		618.144	778.687				673.172	898.413								918.987	1200.92
		618.383	778.805				673.332	898.442								919.187	1201.44
		619.637	779.218				673.454	898.646								919.284	1201.48
		619.967	779.289				673.499	898.704								919.764	1201.49
		619.982	779.793				673.682	898.754								920.23	1202.58
		620.093	779.81				674.297	898.917								920.379	1202.89
		620.249	779.866				674.946	899.222								921.138	1203.08
		620.352	779.969				675.008	899.335								921.547	1204.12
		620.623	780.004				675.07	899.463								921.576	1204.19
		620.675	780.322				675.112	899.601								922.101	1204.78
		620.82	780.97				675.356	899.69								922.136	1205.71
		620.884	781.443				675.399	899.903								922.184	1206.71
		621.063	781.56				675.594	899.935								922.571	1207.4
		621.279	781.8				676.276	899.96								922.645	1207.77
		621.354	782.221				677.707	900.247								923.018	1207.78
		622.291	782.736				677.737	900.906								923.695	1208.6
		622.297	783.126				677.948	900.97								923.972	1209.15
		622.298	783.595				678.338	901.02								924.442	1209.22
		622.653	783.666				678.703	901.237								926.084	1210.16
		622.872	784.156				678.967	901.481								926.294	1210.35
		622.952	784.612				679.005	901.894								926.573	1211.61
		622.968	785.102				679.357	901.937								926.73	1211.82
		623.207	785.534				679.538	902.113								927.042	1212
		623.444	785.574				679.616	902.198								927.944	1212.82
		623.771	785.939				679.74	902.625								928.335	1212.97
		624.061	786.878				679.961	902.683								929.184	1213.17
		624.138	787.05				680.305	903.945								929.378	1214.05
		624.578	787.437				680.353	904.381								929.412	1215.3
		624.866	787.484				681.111	904.553								929.415	1215.69
		625.041	787.56				681.124	905.304								929.739	1216.55
		625.635	787.786				681.295	905.442								930.004	1216.58
		625.836	787.8				681.633	905.498								930.105	1217.11
		625.974	788.099				682.141	905.943								930.633	1218.24
		626.406	788.312				682.623	906.438								931.002	1218.51
		626.464	788.502				683.119	906.608								931.061	1218.71
		626.664	788.901				683.15	906.756								932.009	1219.73
		626.716	788.991				683.169	906.76								932.097	1220.32
		627.175	789.384				683.319	906.961								932.247	1220.35
		627.359	789.405				683.388	907.012								932.358	1221.23
		627.4	789.617				683.644	907.183								933.485	1221.35
		627.499	789.882				683.937	907.975								933.874	1222.79
		627.994	790.163				684.276	908.139								934.102	1224.54
		628.079	790.421				684.421	908.664								934.345	1225.01
		628.133	790.454				684.756	908.696								934.428	1225.43
		628.143	790.509				684.993	908.847								935.303	1225.84
		628.362	790.688				685.392	908.982								935.488	1226.36
		628.663	790.824				685.988	909.136								935.718	1227.27
		628.87	791.312				686.022	909.154								935.762	1227.93
		629.112	791.367				686.473	909.649								935.855	1227.99
		629.232	791.668				687.156	910.321								936.192	1228.18
		629.282	791.991				687.201	910.356								936.621	1228.19
		629.413	792.186				687.554	910.379								936.698	1229.69
		629.471	792.605				687.721	910.458								936.701	1229.78
		629.63	792.963				687.884	910.596								936.755	1230.47
		630.081	792.994				688.128	910.972								936.794	1230.64
		630.541	793.133				688.676	910.991								937.353	1230.65
		630.686	793.529				688.748	911.256								937.471	1231.27
		630.868	793.604				688.796	911.383								938.069	1232.22
		631.412	793.632				688.86	911.444								938.112	1232.31
		631.56	794.522				689.167	911.829								938.39	1233.83
		631.688	794.664				689.338	912.095								938.929	1233.89
		632.128	794.943				689.346	912.097								939.108	1234.45
		632.856	795.263				689.37	912.13								939.197	1234.5
		633.096	795.555				689.537	912.571								939.799	1235.74
		633.096	797.311				689.543	914.25								939.967	1236.1
		633.346	797.316				689.68	914.337								940.064	1236.44
		633.74	797.867				689.884	914.474								940.085	1236.97
		633.748	797.895				689.929	915.244								940.192	1237.4
		634.315	798.035				690.196	915.336								941.739	1238.59
		634.567	798.053				690.282	915.617								942.335	1238.73
		634.647	798.225				690.308	915.663								942.388	1239.25
		634.683	798.765				690.35	915.908								942.829	1240.91
		634.724	798.834				690.575	916.243								943.416	1241.05
		635.621	799				690.755	917.355								943.546	1241.22
		635.794	799.418				691.138	917.471								943.815	1243.03
		635.992	799.485				691.314	917.709								943.955	1243.07
		636.174	799.678				691.629	917.754								943.957	1243.88
		636.349	799.877				691.786	918.07								944.143	1244.27
		636.536	800.468				691.913	918.095								944.24	1245.2
		636.547	801.027				692.012	918.162								944.282	1245.49
		636.598	801.416				692.411	918.488								944.348	1245.51
		636.808	801.592				692.494	918.568								944.392	1246.04
		637.669	801.771				692.653	918.629								945.05	1246.14
		637.789	801.906				692.792	918.696								945.214	1246.19
		638.043	802.127				692.853	918.785								945.374	1246.67
		638.216	802.239				692.972	918.979								945.577	1246.94
		638.268	802.47				693.408	919.366								945.585	1246.98
		638.548	802.557				693.889	919.377								945.703	1247.85
		638.584	802.826				694.499	919.481								946.294	1248.75
		639.421	802.898				695.821	919.556								946.581	1248.9
		639.741	802.936				696.063	919.775								946.767	1249.07
		639.782	803.3				696.147	919.958								947.015	1249.92
		640.111	803.354				696.436	920.397								947.336	1250.68
		640.262	803.509				696.538	920.447								947.435	1251.74
		640.354	803.962				696.656	920.668								947.606	1251.82
		640.509	804.308				696.822	920.852								947.996	1252.91
		640.583	804.557				696.905	920.901								948.258	1254.57
		640.767	805.347				696.947	921.348								948.285	1255.06
		640.871	805.509				697.289	921.463								948.341	1255.6
		641.08	805.626				697.689	921.733								948.764	1255.71
		641.084	805.853				697.789	921.796								949.07	1256.35
		641.179	805.856				697.894	923.115								949.527	1256.53
		641.406	805.992				698.413	923.761								950.03	1257.28
		641.414	806.415				698.734	924.207								950.511	1257.34
		641.686	806.866				698.925	924.439								950.603	1257.76
		641.796	807.101				699.006	924.578								950.666	1258.11
		642.288	807.111				699.248	925.296								951.877	1259.1
		642.4	807.199				699.853	925.446								952.166	1260.02
		642.437	807.439				700.191	925.954								952.379	1262.72
		642.662	807.872				700.36	926.178								952.384	1263.46
		643.276	809.082				700.562	927.707								952.639	1264.11
		643.444	809.937				700.688	928.555								952.682	1265.09
		643.494	810.125				700.902	928.612								952.919	1265.91
		643.586	810.201				700.937	928.846								953.117	1265.96
		643.641	810.242				701.123	929.139								953.217	1265.97
		643.785	811.034				702.046	929.709								953.99	1267.76
		644.171	811.773				702.384	930.167								954.746	1268.2
		644.434	812.179				702.862	930.415								955.256	1270.99
		644.443	812.518				702.866	930.66								956.339	1272.74
		644.629	812.662				703.316	931.062								956.706	1273.06
		644.672	812.902				703.387	931.395								956.75	1273.23
		645.493	813.097				703.458	931.62								956.967	1273.29
		645.742	813.127				703.48	931.886								957.551	1274.01
		646.432	813.242				704.432	931.913								957.576	1276.04
		646.51	813.305				705.954	932.098								957.806	1276.14
		647.007	813.342				706.042	932.397								957.922	1276.24
		647.107	813.614				706.317	933.3								958.754	1276.5
		647.167	814.476				706.398	933.31								959.276	1276.69
		647.206	814.578				706.592	933.615								959.325	1277.51
		647.292	815.112				706.672	933.728								959.49	1278.59
		647.345	815.123				706.745	933.903								959.547	1278.93
		647.674	815.148				706.94	934.332								959.699	1279.82
		647.733	815.161				706.968	934.58								960.182	1279.86
		648.051	815.354				707.647	934.642								960.986	1280.08
		648.092	815.4				707.813	934.645								961.069	1280.86
		648.156	815.944				707.82	934.952								961.437	1281.75
		648.516	816.099				707.841	935.126								962.021	1281.81
		648.933	816.446				707.991	936.262								962.126	1282.15
		648.984	816.463				708.155	937.231								962.328	1282.79
		649.609	816.69				708.385	937.706								962.682	1283
		649.63	816.749				708.478	938.139								962.766	1283.19
		649.834	816.8				708.909	939.326								963.395	1283.83
		649.899	817.094				709.256	939.364								963.815	1283.89
		649.984	817.374				709.262	939.407								964.369	1284.13
		650.085	817.588				709.723	939.896								965.099	1284.42
		650.318	817.613				710.287	939.991								965.322	1285.54
		650.455	817.728				710.877	940.154								965.52	1285.76
		650.731	817.987				711.501	940.31								966.325	1287.38
		651.146	818.135				711.617	940.942								966.72	1287.82
		651.575	818.243				711.628	941.333								969.715	1290.97
		651.814	818.317				711.835	941.844								970.338	1291.15
		652.144	818.559				711.96	941.883								970.447	1292.23
		652.871	818.897				712.338	942.069								970.565	1292.87
		652.961	819.236				712.537	942.32								971.044	1294.04
		653.037	819.573				712.545	942.397								971.275	1295.25
		653.045	819.593				712.579	942.869								971.794	1295.33
		653.662	819.627				713.21	942.985								972.366	1295.66
		653.852	820.306				713.364	943.135								972.489	1295.67
		653.913	820.356				713.443	943.307								972.613	1296.93
		654.393	820.696				713.643	943.524								973.535	1297.18
		654.868	820.802				713.756	943.526								974.096	1297.25
		655.796	820.934				713.885	944.342								974.136	1297.31
		655.797	821.032				714.014	945.118								974.486	1297.69
		655.855	821.255				714.133	945.673								974.564	1297.94
		655.875	821.468				714.506	945.912								974.668	1297.98
		656.159	821.548				714.743	946.007								974.684	1298.46
		656.879	821.549				714.797	946.469								974.893	1298.86
		657.073	821.71				715.198	946.653								974.917	1299.14
		657.318	822.097				715.352	947.404								975.777	1300.09
		657.35	822.287				715.604	948.014								975.896	1300.38
		657.501	822.34				715.621	948.017								976.505	1300.72
		657.641	822.369				716.272	948.304								977.032	1301.32
		657.648	822.384				717.271	948.923								977.054	1302.01
		657.942	822.521				717.389	949.005								977.227	1302.74
		657.975	822.581				717.401	949.344								977.301	1302.74
		658.106	823.019				717.697	950.105								977.505	1302.77
		658.132	823.29				717.948	950.431								977.65	1302.91
		658.398	823.411				718.192	950.486								977.756	1303.12
		658.46	823.434				718.725	950.52								978.127	1303.18
		658.722	823.562				718.73	950.739								978.841	1303.58
		659.213	823.633				719.2	950.74								978.994	1304.46
		659.234	823.731				719.262	950.983								979.057	1305.26
		659.341	823.77				719.942	951.045								979.21	1306.18
		659.664	823.992				720.416	951.255								979.716	1306.51
		659.86	824.226				720.441	951.427								979.756	1306.61
		660.048	824.546				720.447	951.552								980.641	1306.73
		660.227	824.563				720.781	951.852								980.956	1306.82
		660.232	824.638				720.848	951.892								981.171	1307.02
		660.59	824.789				721.113	952.226								981.433	1307.39
		660.833	824.97				721.198	952.642								982.216	1307.99
		661.665	825.335				721.948	952.812								982.227	1308.3
		662.132	825.786				722.29	953.518								983.108	1308.44
		662.273	826.12				722.464	953.643								983.894	1308.81
		662.403	826.601				723.076	953.785								984.393	1309.21
		662.646	826.745				723.216	953.844								984.874	1310.04
		662.702	826.943				723.322	953.915								984.973	1310.22
		662.968	827.448				723.554	953.977								985.49	1310.23
		663.279	827.468				724.26	954.12								987.991	1310.56
		663.442	827.482				724.37	954.402								989.434	1311.35
		663.503	827.786				724.374	954.492								989.613	1311.79
		663.516	827.881				724.579	954.557								989.749	1312.82
		663.671	828.087				724.954	954.671								989.875	1313.13
		663.741	828.642				724.972	955.45								989.974	1313.22
		663.763	828.729				725.168	955.482								990.137	1313.37
		664.011	828.869				725.221	955.91								990.441	1313.95
		664.34	828.974				725.43	956.209								991.145	1315.51
		664.398	829.212				725.725	956.349								992.836	1315.87
		664.475	829.623				725.945	956.974								993.579	1316.33
		664.514	829.687				725.98	957.048								993.968	1316.4
		664.606	829.757				726.162	957.063								994.238	1317.7
		664.795	830.276				726.166	957.275								994.545	1318.04
		664.95	830.329				726.225	957.365								994.758	1318.38
		665.252	831.03				726.713	957.499								995.201	1318.92
		665.289	831.209				726.883	957.682								995.75	1320.32
		665.76	831.689				727.647	957.945								995.898	1323.13
		666.236	832.014				728.118	958.123								995.902	1325.15
		666.252	832.102				728.499	958.147								996.016	1325.33
		666.853	832.12				728.64	958.493								996.678	1325.82
		667.026	832.207				728.942	958.651								997.06	1326.35
		667.112	832.319				729.171	958.873								997.212	1326.6
		667.161	832.335				729.174	958.906								997.253	1326.75
		667.384	832.373				729.476	959.087								997.34	1327.9
		667.409	832.702				729.529	959.325								999.065	1330.11
		668.133	832.879				729.778	959.578								999.676	1330.81
		668.297	833.027				730.204	959.944								999.708	1331.08
		668.578	833.09				730.682	960.511								1000.02	1331.16
		668.668	833.118				730.899	960.586								1000.44	1332.16
		668.669	833.257				731.442	960.602								1001.42	1333.08
		668.677	833.415				731.634	960.795								1001.53	1333.73
		668.758	833.577				731.964	960.938								1002.29	1334.82
		668.799	833.614				732.33	961.45								1002.63	1336.47
		668.85	833.821				732.785	961.731								1003.45	1337.14
		668.915	834.059				732.93	961.941								1003.82	1338.93
		669.012	834.362				733.462	961.95								1003.94	1339.47
		669.146	834.581				733.592	962.474								1006.57	1339.58
		669.182	834.637				733.673	962.88								1006.69	1339.68
		669.329	835.069				733.757	963.01								1006.85	1340.65
		669.383	835.086				733.77	963.298								1006.94	1341.88
		669.627	835.094				733.931	964.748								1006.97	1343.01
		669.88	835.138				734.238	964.856								1008.02	1343.67
		670.35	835.225				734.281	964.959								1008.51	1344.36
		670.606	836.194				734.359	965.188								1008.92	1344.47
		671.045	836.585				734.457	965.193								1009.07	1345.6
		671.109	836.785				734.624	965.193								1009.14	1346.4
		671.135	836.801				734.648	965.622								1010.28	1346.52
		671.296	836.831				734.725	965.659								1010.51	1346.53
		671.362	836.856				734.838	965.676								1010.84	1347.59
		671.399	836.87				735.01	965.921								1011.15	1347.9
		671.544	836.885				735.026	965.961								1011.79	1347.92
		671.625	837.199				735.049	966.03								1011.86	1348.81
		671.994	837.501				735.127	966.346								1012.31	1349.33
		672.299	837.537				735.407	966.502								1012.55	1349.91
		672.467	837.667				735.455	966.653								1012.67	1351.77
		672.563	837.844				735.468	967.074								1012.72	1353.83
		672.594	838.024				735.477	967.205								1013.07	1355.06
		672.785	838.026				735.954	967.253								1013.15	1355.16
		672.796	838.083				736.079	967.444								1014.22	1355.35
		672.846	838.104				736.407	967.474								1014.3	1355.82
		672.989	838.179				736.946	967.825								1014.45	1356.19
		673	838.352				737.066	967.983								1015.15	1358.77
		673.37	838.45				737.585	968.156								1015.93	1359.63
		673.422	839.81				737.758	968.699								1016.08	1360.53
		674.011	840.568				737.903	969.008								1016.13	1361.17
		674.029	841.091				737.949	969.86								1016.54	1361.32
		674.21	841.471				738.317	970.231								1016.76	1361.35
		674.315	841.745				738.357	970.239								1017.33	1361.37
		674.343	841.768				738.379	970.79								1017.36	1361.37
		674.479	841.86				738.507	971.078								1017.62	1367.82
		675.079	842.177				738.72	971.173								1018.18	1369.81
		675.239	842.36				738.739	971.195								1018.47	1371.53
		675.478	842.526				739.43	971.212								1019.29	1372.44
		675.556	842.559				739.647	971.274								1019.79	1372.78
		676.188	842.745				739.671	971.613								1019.82	1374.12
		676.275	842.789				739.689	971.931								1019.92	1374.17
		676.328	843.356				739.757	971.955								1020.32	1374.31
		676.544	843.378				740.113	972.245								1020.84	1374.97
		676.625	843.564				740.791	972.479								1021.07	1376.16
		676.706	843.717				740.874	972.538								1021.37	1377.08
		676.721	844.006				741.058	972.804								1021.78	1377.56
		676.734	844.031				741.204	972.933								1021.83	1378.51
		677.012	844.089				741.262	972.953								1022.11	1378.66
		677.589	844.757				741.414	973.3								1022.18	1379.01
		679.043	844.779				741.585	974.172								1023.37	1379.47
		679.273	845.231				741.749	974.516								1023.48	1380.07
		679.813	845.356				741.856	975.375								1023.84	1380.78
		679.927	845.361				741.882	977.259								1023.98	1381.11
		679.952	845.67				742.082	977.325								1024.01	1381.67
		680.276	846.023				742.229	977.354								1025.52	1382.16
		680.35	846.055				742.283	977.417								1026.03	1382.36
		680.926	846.176				743.213	977.433								1026.56	1382.74
		680.943	846.337				743.507	977.932								1026.56	1383.95
		680.95	846.807				743.682	978.164								1026.79	1384.72
		681.172	846.819				743.732	978.818								1028.21	1385.73
		681.27	847.018				744.002	978.912								1028.23	1386.71
		681.311	847.074				744.155	979.071								1028.36	1386.81
		681.871	847.352				744.192	979.275								1028.5	1386.86
		681.936	847.479				744.66	979.576								1029.68	1388.34
		681.954	847.505				744.958	979.589								1030.25	1390.18
		682.161	848.173				745.191	979.837								1030.99	1392.68
		682.173	848.179				745.244	979.856								1031.53	1393.3
		682.901	848.507				745.456	980.007								1031.57	1394.35
		683.324	849.229				745.582	980.063								1031.83	1394.71
		683.343	849.358				745.785	980.209								1032.47	1396.08
		683.72	849.484				745.827	980.285								1032.63	1397.41
		683.761	849.558				746.038	980.379								1033.44	1399.67
		683.88	849.758				746.525	980.515								1033.54	1399.74
		684.01	850.16				746.857	980.535								1034.3	1400.92
		684.056	850.426				747.666	980.538								1034.62	1401.04
		684.151	850.793				747.826	980.704								1034.93	1401.18
		684.177	850.962				748.399	981.537								1035.02	1404.08
		684.23	851.01				748.63	981.602								1035.09	1404.68
		684.283	851.152				748.637	981.766								1035.11	1405.12
		684.373	851.222				748.713	982.069								1035.25	1405.46
		684.516	851.255				748.869	982.981								1035.44	1408.56
		684.527	851.303				749.078	983.341								1035.63	1409.47
		684.612	851.319				749.884	983.45								1035.98	1412.19
		684.786	851.324				749.91	985.604								1036.02	1415.94
		684.964	851.622				750.168	985.848								1036.49	1416.3
		685.57	851.914				750.297	985.941								1036.64	1418.66
		686.333	852.468				750.764	986.025								1036.85	1418.82
		686.372	852.551				750.962	986.025								1037.3	1418.88
		686.398	853.357				751.383	986.096								1037.39	1419.13
		686.499	853.499				751.451	986.2								1037.62	1422.02
		686.522	854.179				751.535	986.484								1038.28	1424.1
		686.824	854.402				751.622	986.745								1038.84	1426.14
		687.014	854.603				751.755	987.202								1039.41	1429.67
		687.161	854.636				751.769	987.743								1039.53	1431.4
		687.298	854.725				751.881	987.985								1040.9	1431.97
		687.306	854.798				752.489	988.087								1041.17	1432.48
		687.492	854.848				752.514	988.359								1042	1433.68
		687.618	854.95				754.323	988.772								1042.72	1434.88
		687.93	855.076				754.523	988.859								1042.81	1435.17
		688.016	855.336				754.554	988.951								1043.17	1437.03
		688.116	855.454				754.577	989.008								1043.45	1437.43
		688.195	855.458				754.603	989.393								1043.55	1437.88
		688.35	855.684				754.945	989.801								1043.55	1438.46
		688.475	855.697				755.123	990.163								1045.67	1439.75
		688.679	855.862				755.187	990.187								1046.1	1440.1
		689.394	855.982				755.36	990.202								1046.55	1441.76
		689.405	856.466				755.474	990.368								1047.04	1442.96
		689.436	856.763				755.48	990.441								1047.51	1443.65
		689.78	856.877				755.506	990.483								1047.95	1444.27
		690.03	857.234				755.707	990.624								1049.07	1444.39
		690.105	857.287				756.087	990.672								1050.24	1444.67
		690.151	857.303				756.544	990.692								1050.45	1446.28
		690.454	857.653				756.945	990.854								1050.86	1450.5
		690.465	857.951				757.04	990.857								1050.94	1452.84
		690.617	858.02				757.236	991.12								1051.15	1453.99
		690.892	858.154				757.457	991.475								1051.37	1454.58
		690.982	858.181				757.706	991.611								1051.99	1455
		691.072	858.296				757.725	991.72								1052.37	1455.15
		691.425	858.421				757.828	992.428								1052.8	1456.27
		691.497	858.805				757.881	992.636								1053.17	1462.13
		691.663	858.844				758.009	992.671								1053.63	1462.84
		691.824	858.994				758.35	992.719								1053.99	1463.14
		691.941	859.012				758.619	992.892								1054.06	1469.5
		692.132	859.188				759.002	993.113								1054.39	1469.92
		692.278	859.399				759.13	993.709								1054.62	1470.02
		692.665	859.709				759.138	994.265								1054.96	1473.44
		692.741	859.804				759.804	994.437								1055.52	1474.45
		693.399	859.872				759.88	994.678								1055.72	1475.57
		693.561	860.67				760.122	995.242								1055.96	1475.72
		694.091	860.971				760.583	995.784								1056.27	1480.86
		694.242	861.13				760.634	996.63								1056.47	1481.41
		694.245	861.32				761.358	996.649								1057.16	1481.56
		694.366	861.543				761.986	996.721								1057.41	1482.21
		694.534	861.793				762.13	996.906								1057.42	1488.68
		694.749	861.922				762.589	998.352								1058.13	1488.96
		695.037	862.054				763.111	998.533								1058.43	1491.7
		695.391	862.141				763.341	998.631								1058.43	1492.3
		695.62	862.155				763.913	998.654								1058.56	1494.24
		695.633	862.276				764.356	998.972								1058.62	1494.85
		695.647	862.328				764.842	999.238								1058.76	1495.4
[truncated: 3,157 more rows]

## Sheet: IVM Random Sample Super Plots
WT	Exp 1 - 0.5uM	254.749	1308.01	Exp 2 - 0.5uM	379.587	Exp 3 - 0.5uM	1462.19	1681.75		E525K	Exp 1 - 0.5uM	361.702	Exp 2 - 0.5uM	1685.69	Exp 3 - 0.4uM	1047.04	1576.2
		1134.33	676.689		874.128		436.157	827.825				1191.17		725.212		1075.32	360.322
		339.259	643.408		855.323		883.114	689.583				233.092		615.953		606.592	1251.74
		338.518	1371.24		1160.94		550.105	825.803				1042.05		658.846		442.016	281.308
		1001.3	588.114		1150.11		456.657	467.342				577.898		1164.92		859.959	580.363
		1165.58	577.146		1038.69		700.902	291.038				1147.43		1131.76		795.391	273.025
		1292.13	1137.98		1438.82		926.816	730.785				1348.71		919.385		307.552	713.27
		1011.12	1259.89		182.392		711.628	1250.28				476.395		782.412		700.586	801.918
		731.252	517.587		1161.03		423.281	779.017				317.597		751.627		1127.53	891.82
		702.172	1570.37		623.568		940.844	575.813				1355.08		1246.41		885.998	783.499
		633.346	1072.81		824.659		729.171	1244.72				1103.95		961.841		978.127	1308.44
		498.78	600.309		451.925		698.734	234.524				684.337		410.262		658.762	1057.93
		1282.8	439.056		737.637		515.683	410.583				1197.08		1154.59		630.669	1280.08
		991.5	1048.75		769.486		1047.32	436.89				888.299		486.595		446.575	709.798
		1398.36	489.432		1097.44		1023.27	799.327				1219.97		773.703		975.896	699.935
		1229.79	938.227		701.678		993.628	832.424				513.299		933.385		871.493	861.148
		1274.98	1125.08		386.808		1192.58	1741.97				946.014		1225.14		378.717	382.545
		347.636	1331.64		907.34		1144.45	648.102				626.792		1238.97		1153.74	929.634
		737.619	740.867		1294.2		318.689	824.013				315.44		1033.8		898.017	1039.41
		556.197	616.948		915.712		827.195	879.119				673.757		1082.84		231.843	846.525
		349.858	1266.93		1284.04		169.359	1317.09				1916.56		1307.88		1043.17	1474.45
		622.952	748.485		947.234		330.32	1229.8				1977.81		586.318		501.964	1302.74
		549.913	209.33		1341.41		692.653	1393.4				860.062		1306.6		808.318	1404.08
		376.911	222.524		463.507		1173.73	532.806				1252.87		1160.06		830.555	1043.61
		1936.59	1314.9		1259.65		751.622	615.942				353.729		1261.95		543.757	1199.51
		1021.12	663.953		850.38		893.999	704.723				1227.93		715.757		1631.36	1083.41
		894.943	903.289		1185.69		327.553	585.272				998.992		889.725		1310.49	589.069
		696.237	779.969		1300.84		462.085	538.931				1026.57		885.476		899.268	710.318
		1380.9	1179.16		922.111		813.523	1124.97				701.825		421.678		835.554	888.406
		405.749	983.455		426.322		1075.71	1133.43				1069.16		665.623		657.316	1110.76
		732.355	1164.17		968.055		1611.61	1236.48				1364.03		1150.66		959.276	413.759
		921.304	463.276		857.869		1017.48	799.874				1179.31		815.243		849.852	848.869
		878.305	751.395		791.707		563.379	398.534				1216.07		1009.35		656.312	647.531
		1024.27	1087.96		860.331		411.531	1068.6				687.368		807.416		399.009	952.687
		1438.38	1467.05		804.358		362.231	529.234				728.783		1513.94		1168.64	1245.51
		1092.65	1098.16		1873.8		649.402	668.011				1588.36		985.709		1232.97	1138.16
		1199.49	1004.04		728.304		142.001	227.832				1615.83		1226.76		528.904	733.96
		377.045	658.358		680.176		339.147	776.17				619.707		1184.44		683.034	628.234
		1298.55	558.026		563.227		259.489	1202.24				790.48		391.738		684.276	1003.96
		789.087	1179.08		901.406		794.494	794.469				1016.93		859.354		683.396	1055.94
		1390.1	1065.39		729.616		137.76	1185.19				902.363		835.292		1404.69	1482.21
		230.762	1012.96		916.972		2124.99	1474.2				593.97		387.753		819.508	899.487
		942.636	96.0178		584.108		1122.16	965.961				289.822		650.158		294.305	626.643
		563.574	1255.51		782.997		832.273	721.839				889.562		440.745		1294.38	1884.45
		821.934	707.224		585.894		410.126	1052.32				1032.37		604.503		872.606	452.763
		1389.16	727.793		626.324		851.699	1682.71				976.351		714.803		217.054	614.278
		1284.46	1124.5		646.321		1147.45	1243.62				232.282		908.507		1070.81	1331.08
		545.406	1266.16		1178.89		573.79	630.83				1044.58		1013.12		800.658	1302.01
		512.058	614.017		815.027		787.41	653.231				320.345		400.67		1592.34	1355.06
		870.149	1136.25		724.339		492.539	885.946				1233.32		304.63		1316.85	268.667
					997.623							1221.6		238.589
					638.691							894.837		993.938
					1497.63							755.505		494.187
					813.511							569.606		845.539
					850.653							625.096		814.75
					1272.07							840.298		736.786
					1031.84							796.615		1203.24
					951.964							540.694		317.22
					545.012							971.129		767.778
					1302.37							282.905		1175.28
					1044.18							892.008		1064.16
					415.709							713.392		562.041
					1039.08							638.547		1155.36
					778.475							157.519		551.057
					1144.66							1327.78		357.652
					1168.68							1227.43		652.719
					936.729							1596.23		492.245
					1552.38							542.392		199.809
					677.843							407.691		331.318
					973.253							430.615		1686.36
					1095.81							1172.39		893.534
					985.485							793.191		947.012
					853.199							584.292		1646.54
					857.535							462.326		272.57
					1085.42							584.768		531.197
					692.585							384.331		853.206
					920.527							994.596		567.81
					771.592							635.391		1482.78
					1300.48							1196.98		340.377
					860.651							477.649		627.481
					654.819							951.639		808.716
					537.167							234.905		899.194
					754.99							1226.04		970.205
					465.188							279.869		184.942
					1129.08							555.448		1005.89
					1090.97							1129.73		603.248
					1158.63							1332.57		1133.06
					1343.02							234.968		779.97
					796.896							350.761		1221.74
					968.351							659.422		206.352
					318.447							1509.46		830.834
					598.407							1419.84		546.392
					1044.39							1326.2		1318.77
					802.663							1344.65		466.892
					759.081							1273.71		1270.23
					921.873							727.887		788.715
					1276.38							1106.36		1824.23
					1163.04							938.956		424.233
					1324.1							930.608		846.661
					1064.67							884.341		1527.95
