# Supplementary material for: Dilated cardiomyopathy mutation E525K in human beta-cardiac myosin stabilizes the interacting-heads motif and super-relaxed state of myosin
Source: eLife journal article supplement (doi:10.7554/elife.77415), 2022-11-08
Supplement: fig3-data1 [file FIgure 3-source data1.xlsx]

## Sheet: Traces
E525K 15HP	Single Turnover	Normalized	Fluorescence				WT 15HP	Single Turnover	Normalized	Fluorescence
Time (s)	20 mM KCl	50 mM KCl	75 mM KCl	100 mM KCl	150 mM KCl		Time (s)	20 mM KCl	50 mM KCl	75 mM KCl	100 mM KCl	150 mM KCl
0.001	1	1	1	1	1		0.001	1	1	1	1	1
0.002	1.07839	0.951111	0.984147	0.897439	1.01745		0.002	1.03629	1.0122	1.05812	1.05588	1.06791
0.003	1.08557	0.959285	1.02131	0.953473	1.00829		0.003	1.03525	1.02062	1.05306	1.05528	1.07509
0.004	1.09319	0.990287	1.01695	0.968143	1.04716		0.004	1.02762	1.01028	1.05566	1.0515	1.06285
0.005	1.08822	0.992683	1.02684	0.982398	1.02651		0.005	1.01873	1.03621	1.05373	1.03919	1.05497
0.006	1.01619	0.941106	0.993967	0.951149	1.02994		0.006	1.01171	1.02005	1.0326	1.01306	1.04594
0.007	1.04503	0.969062	1.00671	0.951068	1.01239		0.007	1.00305	1.03582	1.03054	1.03011	1.05249
0.008	1.05848	0.981669	1.00743	0.975793	1.00489		0.008	1.01052	1.01463	1.0304	1.02962	1.06213
0.009	1.06901	0.995317	1.01528	0.971714	1.02625		0.009	1.02111	1.02837	1.03753	1.04919	1.0432
0.01	1.06323	1.00273	1.01832	0.980216	1.04677		0.01	1.0189	1.03963	1.06845	1.03687	1.0623
0.011	1.03911	0.969431	0.99574	0.970314	1.01443		0.011	1.00398	1.03059	1.03507	1.01852	1.04815
0.012	1.04231	0.985214	1.00987	0.96165	1.00821		0.012	0.987748	1.01563	1.03341	1.03298	1.05467
0.013	1.04302	0.962515	1.01793	0.956598	1.0189		0.013	0.998566	1.01148	1.03254	1.02856	1.05661
0.014	1.06411	0.956119	1.00916	0.961894	1.02826		0.014	1.02074	1.02246	1.02278	1.03778	1.04502
0.015	1.03537	0.968488	1.02366	0.963618	1.03697		0.015	1.00346	1.01766	1.0171	1.02657	1.07376
0.016	1.02382	0.959404	1.0312	0.952276	1.03448		0.016	1.00408	1.01899	1.034	1.0297	1.06257
0.017	1.07408	0.967783	1.02676	0.96371	1.01737		0.017	1.00003	1.02253	1.03585	1.04341	1.044
0.018	1.04287	0.982417	1.03197	0.952357	1.03833		0.018	1.01462	1.03735	1.02814	1.02849	1.03854
0.019	1.0443	0.963978	1.02631	0.962969	1.01755		0.019	1.01242	1.01048	1.02723	1.03368	1.04757
0.02	1.06318	0.944195	1.01302	0.966266	1.01589		0.02	1.01208	1.03781	1.00855	1.02676	1.06433
0.021	1.07403	0.962569	1.01612	0.955106	1.0345		0.021	1.02665	1.02207	1.03658	1.05004	1.06155
0.022	1.06433	0.959957	0.997905	0.957389	1.00095		0.022	1.01822	1.01966	1.02739	1.03281	1.04837
0.023	1.06309	0.975924	1.01394	0.941471	1.03011		0.023	1.00648	1.03852	1.03921	1.03524	1.05152
0.024	1.02901	0.974883	1.01683	0.976199	1.04801		0.024	1.01909	1.03665	1.03994	1.03777	1.05604
0.025	1.03464	0.961962	0.988568	0.954376	1.0379		0.025	1.02655	1.02745	1.03645	1.02784	1.03294
0.026	1.02802	0.962396	1.02422	0.960869	1.03819		0.026	1.00316	1.00357	1.01462	1.01664	1.03795
0.027	1.0461	0.968108	1.00978	0.958779	1.02964		0.027	1.0235	1.04456	1.04702	1.00935	1.05781
0.028	1.0633	0.988553	1.02926	0.967098	1.03958		0.028	1.01744	1.02991	1.01841	1.02503	1.05424
0.029	1.03374	0.964271	1.01905	0.970132	1.00893		0.029	0.999838	1.03424	1.03215	1.04378	1.05508
0.03	1.05742	0.946775	1.01726	0.952408	1.01461		0.03	1.00462	1.02511	1.02138	1.02802	1.04139
0.031	1.0684	0.967946	1.00715	0.950125	1.00978		0.031	1.00736	1.03357	1.02989	1.03872	1.0298
0.032	1.04948	0.964163	1.00829	0.965871	1.04097		0.032	0.980943	1.027	1.03176	1.03464	1.0523
0.033	1.04748	0.979827	0.991941	0.965688	1.02859		0.033	1.03245	1.0318	1.039	1.01237	1.03875
0.034	1.01688	0.945409	1.00404	0.959591	1.01617		0.034	1.02112	1.03301	1.02693	1.03159	1.03351
0.035	1.09352	0.944683	1.00246	0.95052	1.028		0.035	1.01616	1.03805	1.01248	1.04341	1.05346
0.036	1.04731	0.94748	1.01696	0.96442	1.01725		0.036	0.996619	1.04409	1.03303	1.04273	1.0534
0.037	1.04313	0.964098	1.00971	0.977142	1.01888		0.037	1.01203	1.04161	1.02588	1.01831	1.05964
0.038	1.04055	0.984585	1.02108	0.951119	1.01538		0.038	0.992828	1.02375	1.01476	1.02871	1.04278
0.039	1.04074	0.943935	1.03025	0.959337	1.02361		0.039	1.01585	1.03043	1.0291	1.04312	1.06424
0.04	1.05175	0.958255	1.02328	0.958566	1.03322		0.04	1.01319	1.02297	1.02302	1.02582	1.03345
0.041	1.04206	0.958808	0.984008	0.973003	1.03044		0.041	1.01505	1.03435	1.04475	1.0391	1.04262
0.042	1.0662	0.977572	1.01874	0.954295	1.01554		0.042	1.01264	1.05061	1.03456	1.04172	1.06225
0.043	1.00236	0.961496	1.02439	0.941004	1.02087		0.043	1.00898	1.01908	1.0216	1.01554	1.04328
0.044	1.05865	0.958927	0.997962	0.9686	1.03888		0.044	1.02462	1.02795	1.01737	1.0164	1.04536
0.045	1.03174	0.970276	1.01888	0.968234	1.03194		0.045	1.01434	1.01783	1.03076	1.02949	1.03224
0.046	1.06804	0.955501	1.0233	0.942901	1.02534		0.046	1.01	1.0299	1.02281	1.03238	1.04746
0.047	1.05448	0.994266	1.03256	0.954558	1.03361		0.047	1.01197	1.02858	1.0343	1.03315	1.03649
0.048	1.07266	0.960715	1.00168	0.956192	1.03505		0.048	1.01199	1.01518	1.02513	1.02978	1.04034
0.049	1.07824	0.988965	1.01582	0.961792	1.01288		0.049	0.997643	1.02065	1.00393	1.04699	1.03525
0.05	1.07718	0.961377	1.0327	0.953615	1.04817		0.05	0.995398	1.01314	1.02699	1.03281	1.04324
0.051	1.06313	0.960889	1.01571	0.947132	1.00764		0.051	0.992742	1.01326	1.02166	1.0264	1.03715
0.052	1.06864	0.973745	1.01648	0.968681	1.03295		0.052	0.995765	1.02301	1.02943	1.03956	1.02269
0.053	1.08979	0.969117	1.00797	0.979841	1.04119		0.053	0.999394	1.00309	1.01175	1.01739	1.02973
0.054	1.03664	0.990255	1.01881	0.970923	1.03444		0.054	1.00621	1.00141	1.003	1.04011	1.02214
0.055	1.05891	0.974341	1.01738	0.963608	1.01859		0.055	1.00579	1.02132	1.02278	1.00428	1.02189
0.056	1.00636	0.984325	1.00636	0.964176	1.0123		0.056	1.00598	1.01362	0.997184	1.02314	1.01671
0.057	1.06315	0.977279	1.01965	0.970253	1.01964		0.057	1.01442	0.999903	1.02285	1.02526	1.01882
0.058	1.03357	0.966472	0.997237	0.965363	1.02751		0.058	1.02649	1.02566	1.01405	1.02901	1.03718
0.059	1.01904	0.975718	1.01487	0.979455	1.02585		0.059	0.998788	1.02376	1.00965	1.03056	1.04208
0.06	1.03405	0.958211	1.0189	0.977974	1.01323		0.06	1.01598	1.03708	1.00631	1.01722	1.0417
0.061	1.03525	0.985832	1.01226	0.950145	1.02033		0.061	0.991137	1.02491	1.00358	1.03579	1.03343
0.062	1.09395	0.981951	1.02788	0.967129	1.00469		0.062	1.00651	0.999976	1.01481	1.03178	1.03367
0.063	1.03897	0.973756	1.02385	0.978339	1.01097		0.063	1.01093	1.02395	1.02905	0.998453	1.00468
0.064	1.04259	0.980195	0.994739	0.985796	1.02724		0.064	1.00181	1.02096	0.998255	1.03299	1.01514
0.065	1.04513	0.98206	1.02201	0.97351	1.01706		0.065	0.995295	1.01472	1.02475	1.03329	1.01792
0.066	1.01337	0.974168	1.02894	0.977984	1.02618		0.066	0.999428	1.01338	1.01095	0.999816	1.01275
0.067	1.033	0.974905	1.02334	0.975509	1.00972		0.067	0.984623	1.00943	1.02262	1.01796	1.02074
0.068	1.02032	0.95807	1.00277	0.982722	1.02769		0.068	1.02318	1.01906	1.01239	1.01167	1.02292
0.069	1.03327	0.978016	0.997789	0.982895	1.0174		0.069	1.00895	1.01338	1.0278	1.03222	1.02308
0.07	1.00562	0.965593	1.01973	0.969371	1.03042		0.07	0.999676	1.01438	1.00499	1.02352	1.0103
0.071	1.06248	0.989724	1.02418	0.985046	1.02104		0.071	0.988499	1.04262	1.01324	1.00507	1.02148
0.072	1.04402	0.968802	1.0075	0.963446	1.01234		0.072	0.997208	1.01905	1.00833	1.02973	1.01528
0.073	1.03782	0.977008	1.03161	0.956699	1.01475		0.073	1.00384	1.01239	1.02208	1.02735	1.02176
0.074	1.01783	0.984087	1.00211	0.978806	1.04465		0.074	0.993622	1.02679	1.0022	1.01664	1.02173
0.075	1.02795	0.983003	1.01293	0.97629	1.0104		0.075	0.983359	1.03301	1.0194	0.995316	1.03227
0.076	1.04365	0.986949	1.03403	0.9686	0.991577		0.076	0.993127	1.02089	1.00393	1.02917	1.03554
0.077	1.03838	0.96877	0.987716	0.990991	1.01709		0.077	0.988559	1.02496	1.01429	1.00084	1.0185
0.078	1.03025	0.974103	1.01079	0.981627	1.01359		0.078	0.995961	1.02101	1.02084	1.01001	1.0277
0.079	1.0355	0.987024	1.03499	0.982722	1.01778		0.079	1.00747	1.01555	1.0132	1.01396	1.01763
0.08	1.03534	0.986103	1.00623	0.983524	1.01535		0.08	0.99819	1.01282	1.01657	1.00677	1.02413
0.081	1.0011	0.983946	1.005	0.981515	1.02103		0.081	1.00669	1.00905	1.01454	1.03004	1.02912
0.082	0.998371	0.967653	1.04174	0.974373	1.01169		0.082	0.976614	1.03578	1.00754	1.01231	1.01426
0.083	1.01274	0.967957	1.0102	0.970852	1.01149		0.083	0.990044	1.00791	1.00234	1.02538	1.02393
0.084	1.03954	0.951512	1.01615	0.988221	1.01634		0.084	0.985929	1.02688	1.0171	1.01777	1.03695
0.085	1.02656	0.973366	1.01003	0.959246	1.02213		0.085	1.00985	1.02811	1.00778	1.01567	1.0238
0.086	1.01364	0.981279	1.01266	0.965536	1.0129		0.086	1.0217	1.03327	1.0145	1.02109	1.015
0.087	1.02932	0.985268	1.00074	0.984954	1.00391		0.087	1.01357	1.00477	1.00309	1.0038	1.01044
0.088	1.01362	0.967035	1.00547	0.964339	1.04572		0.088	0.993733	1.02528	1.0159	1.00926	1.03116
0.089	1.02361	0.976119	1.02034	0.982945	1.01899		0.089	1.00936	1.01025	0.998491	1.00662	1.01503
0.09	1.03431	0.966829	1.04094	1.00289	1.00311		0.09	0.992982	1.01154	1.02351	1.01648	1.03259
0.091	1.02534	0.974743	1.01295	0.992239	1.00607		0.091	0.991692	1.02073	1.00991	1.02068	0.993124
0.092	1.01072	0.976173	1.01261	0.965779	1.00437		0.092	0.992461	1.02096	1.00594	1.00573	1.03043
0.093	1.0246	0.972921	1.01935	0.97073	1.00906		0.093	1.00466	1.02498	0.994287	1.01369	1.0143
0.094	1.00941	0.982992	1.03491	1.00401	1.02338		0.094	0.997695	1.02634	0.981456	1.02835	1.00042
0.095	1.05511	0.946862	1.02571	0.976919	1.00535		0.095	0.99071	1.02275	1.00503	1.02199	1.00751
0.096	1.01114	0.983046	1.00804	1.00655	1.02638		0.096	0.990745	1.02952	0.986683	1.01853	0.992301
0.097	1.00723	0.978645	1.00825	0.983016	1.01935		0.097	0.98972	1.01246	0.989426	1.01517	0.995021
0.098	1.04585	0.968683	1.01612	0.975904	1.01182		0.098	0.998318	1.02922	0.995407	1.01817	1.01371
0.099	1.03925	0.964119	1.00078	0.980693	1.00623		0.099	0.996166	1.01399	1.00717	1.03305	1.02304
0.1	1.02414	0.993561	1.00436	0.970548	1.01282		0.1	0.991701	1.01628	0.987559	1.02297	0.998598
0.101	1.0334	0.998287	1.0438	0.979932	1.02672		0.101	1.00434	1.00628	0.99862	1.03121	1.02214
0.102	1.03264	0.952618	1.03213	0.978289	1.00242		0.102	0.999949	1.03203	0.999935	1.02876	1.01288
0.103	1.00939	0.962276	1.02324	0.963294	1.04036		0.103	0.974086	1.02941	1.01808	1.0104	0.998279
0.104	1.01431	0.989182	1.02139	0.974606	1.00659		0.104	0.980157	1.0353	0.988111	1.02073	1.0098
0.105	1.03329	0.960878	1.01178	0.948826	1.00443		0.105	1.00061	1.01367	1.00876	1.01348	1.01248
0.106	1.03833	0.964206	0.994566	0.973003	1.00651		0.106	1.0314	1.01923	0.992745	1.01863	1.02253
0.107	0.984593	0.983556	1.00067	0.973125	0.996329		0.107	0.997567	1.02395	0.990148	1.0195	1.00233
0.108	1.0375	0.990743	1.03398	0.997311	1.02796		0.108	0.974334	1.02775	0.998077	1.02439	1.01717
0.109	1.02426	0.957312	1.01014	0.972607	1.006		0.109	1.00505	1.03519	0.998101	1.007	1.00382
0.11	1.00964	0.972661	1.01689	0.991853	1.02623		0.11	1.01077	1.01646	1.0179	1.03014	1.00348
0.111	1.03757	0.961572	0.997248	0.988647	1.03264		0.111	1.00844	1.0151	0.993483	1.00939	1.01353
0.112	1.03025	0.980282	1.0348	0.976473	1.01401		0.112	1.01484	1.03247	0.985068	1.01168	1.0116
0.113	1.0248	0.973691	1.01455	0.963375	1.02995		0.113	0.9889	1.01464	0.991682	1.02836	1.01304
0.114	1.05273	0.963306	1.016	0.993923	1.00725		0.114	0.987935	1.01464	1.00607	1.00254	1.0095
0.115	1.01161	0.987718	1.00771	0.977335	1.01537		0.115	1.00854	1.02334	1.0038	1.00693	1.00606
0.116	1.01542	0.967501	1.00405	0.976818	1.03544		0.116	0.990625	1.01967	0.995439	1.03327	1.02127
0.117	1.03822	0.971035	1.01554	0.984214	1.01796		0.117	0.990745	1.01018	0.978746	1.02807	1.01551
0.118	1.03568	0.96322	1.01147	0.981048	1.02063		0.118	0.990283	1.00913	0.989994	1.0274	1.00995
0.119	1.02911	0.976802	0.994842	0.963628	1.02175		0.119	0.990523	1.02917	0.99802	1.00524	1.02598
0.12	1.00926	0.963989	1.01395	0.96933	1.0328		0.12	1.01458	1.02559	0.987413	1.02678	1.0173
0.121	1.03073	0.948293	1.01083	0.970466	1.0199		0.121	1.00187	1.01127	0.972992	1.0111	0.978096
0.122	1.04074	0.958569	1.02516	0.984772	1.02347		0.122	0.989498	1.02105	0.996413	1.01273	1.0173
0.123	1.04045	0.983209	0.996765	0.982367	1.00155		0.123	0.984008	1.0304	0.998336	1.01802	1.00258
0.124	1.05294	0.942818	1.02175	0.96513	1.0111		0.124	1.0132	1.01425	0.992753	1.00446	1.02566
0.125	1.00383	0.955718	0.999816	0.968661	1.00782		0.125	0.98189	1.02029	0.997484	0.984644	1.01283
0.126	1.0104	0.98168	0.997893	0.996175	1.02016		0.126	0.984418	1.01662	0.992225	1.01377	1.02088
0.127	1.02296	0.957908	1.00135	0.977355	1.00677		0.127	1.00826	1.02969	0.996234	1.02567	1.02372
0.128	1.01969	0.974927	1.00356	0.975478	1.02962		0.128	1.0145	1.03239	1.00706	1.01855	1.01581
0.129	0.998238	0.954753	1.01855	0.971735	1.01993		0.129	0.996004	1.02337	1.00465	1.01279	1.01471
0.13	1.03352	0.944314	1.01121	0.990068	1.0227		0.13	0.993784	1.02883	0.998085	1.00172	1.0177
0.131	1.03266	0.962829	1.02192	0.971055	1.03106		0.131	1.00071	1.02841	0.989036	1.02943	0.999782
0.132	1.03455	0.988911	1.02756	0.967423	1.02489		0.132	0.989063	1.02775	1.00579	1.00601	1.01212
0.133	1.04859	0.947729	1.02758	1.00727	1.00686		0.133	1.00011	1.02036	1.00215	1.01416	0.99759
0.134	1.01199	0.974775	1.01357	0.984386	1.02838		0.134	0.989139	1.01845	0.9879	1.01421	1.0141
0.135	1.00367	0.969864	1.0257	0.996733	1.02942		0.135	0.993844	1.00705	0.985498	1.02406	1.00383
0.136	1.03276	0.965864	1.03196	0.986649	1.0287		0.136	1.00266	1.0065	0.996381	1.02184	1.01882
0.137	1.04238	0.954656	1.01613	0.967129	1.04347		0.137	0.982881	1.01472	0.984045	1.00094	1.01752
0.138	1.04417	0.962417	1.01679	0.992817	1.01581		0.138	1.00648	1.01321	0.999399	1.02286	0.999824
0.139	1.04429	0.966569	1.01821	0.975773	1.02122		0.139	1.00105	1.02374	0.981464	1.02721	1.00482
0.14	1.04899	0.949561	1.0117	0.947233	1.02279		0.14	0.980755	1.02399	0.989458	1.01362	1.02117
0.141	1.03638	0.982309	1.03333	0.990727	1.01124		0.141	1.00385	1.0181	0.999059	1.02134	1.02511
0.142	0.996701	0.985377	0.992021	0.993466	1.02822		0.142	0.988747	1.03992	0.983867	1.02652	1.0068
0.143	0.995959	0.955913	1.00591	0.99374	1.03444		0.143	0.987491	1.02302	1.00384	0.99913	1.00641
0.144	1.01639	0.972217	1.01018	0.984274	1.03094		0.144	0.9934	1.01883	0.997022	1.00105	0.997859
0.145	1.04931	0.954428	1.02257	0.980206	1.03734		0.145	0.997994	1.01044	1.00373	1.01541	1.03252
0.146	1.04327	0.955729	1.0083	0.970629	1.01761		0.146	0.974983	1.00518	0.993946	1.0146	0.995685
0.147	1.0397	0.957539	0.998146	0.974159	1.00741		0.147	0.999419	0.999879	0.975208	1.01936	1.0025
0.148	1.04049	0.965593	1.02318	0.972465	1.02216		0.148	0.997387	1.02972	0.998604	1.03269	1.01608
0.149	1.01637	0.944499	1.0318	0.988607	0.996776		0.149	0.993571	1.02017	0.989004	1.03242	1.03295
0.15	1.00191	0.969431	1.00509	0.98116	1.02655		0.15	0.976716	1.03438	1.00351	1.03929	1.00485
0.151	1.04798	0.960412	1.00828	0.96654	1.02479		0.151	0.991393	1.03526	1.0017	1.03211	1.02363
0.152	1.00138	0.981431	1.02437	1.00506	0.996506		0.152	0.973369	1.02126	0.996291	1.01179	1.02122
0.153	1.02578	0.964033	1.01097	0.97211	1.02086		0.153	1.0116	1.01727	0.988996	1.00532	1.0073
0.154	1.02823	0.971523	1.01893	0.979476	1.01234		0.154	0.990975	1.02272	1.01215	1.01091	1.00596
0.155	1.01204	0.96052	1.01487	0.98469	1.01415		0.155	1.00929	1.01223	0.987957	1.02931	1.00625
0.156	1.0139	0.997301	1.0348	0.968965	1.01359		0.156	0.994809	1.01635	0.99845	1.02093	0.999127
0.157	1.02181	0.973962	1.02513	0.956699	1.01753		0.157	1.00779	1.0328	0.98084	0.999197	1.02431
0.158	1.03682	0.977919	1.00448	0.988282	1.02293		0.158	0.979807	1.02676	0.993427	1.02145	0.988557
0.159	1.01188	0.978472	1.01143	0.992249	0.988374		0.159	0.998164	0.995857	0.987251	1.01483	1.01814
0.16	1.01422	0.974949	1.00527	0.966723	1.02101		0.16	1.0158	1.02113	0.987064	1.01066	1.03077
0.161	1.03441	0.956076	1.01982	0.979455	1.04336		0.161	0.970091	1.03318	0.994871	1.01516	0.995198
0.162	1.03621	0.955295	0.993979	0.966033	1.03046		0.162	0.994826	1.02594	1.02167	1.01818	1.01417
0.163	1.04242	0.970309	1.00852	1.0003	1.02902		0.163	0.994706	1.01654	1.00648	1.01465	1.02179
0.164	1.02125	0.984	0.998895	0.970801	1.00549		0.164	1.01502	1.02873	0.986756	1.00426	1.0193
0.165	1.01598	0.967035	1.02534	0.960169	1.00417		0.165	0.992802	1.033	0.999708	1.03147	1.00663
0.166	1.03225	0.964195	1.02452	0.954497	1.03183		0.166	0.992888	1.01473	0.998182	1.02062	1.01803
0.167	1.01256	0.950005	1.02175	0.980855	1.01461		0.167	1.00283	1.0152	0.980937	1.03016	1.02258
0.168	1.00609	0.961084	1.01227	0.970811	1.03645		0.168	0.994723	1.03133	1.00652	1.01664	1.02634
0.169	1.04837	0.957008	0.998941	0.97698	1.02306		0.169	0.991803	1.0313	0.996251	1.03	1.00362
0.17	1.01653	0.955783	0.996431	0.972435	1.03255		0.17	1.02519	1.00542	0.993394	1.02259	1.02787
0.171	1.03217	0.981962	1.05253	0.991123	1.00981		0.171	0.981848	1.02399	1.00829	1.0169	1.02222
0.172	1.04449	0.986786	1.03058	0.983595	1.00004		0.172	0.98201	1.02949	0.994644	1.01911	1.00844
0.173	1.03823	0.953463	1.00307	0.972993	1.01119		0.173	1.0045	1.02952	0.997509	1.03684	1.01988
0.174	1.02752	0.950103	1.01577	0.967991	1.02213		0.174	0.989703	1.02869	0.983526	1.01465	0.995517
0.175	0.998476	0.990168	1.03423	0.966327	1.00569		0.175	0.997439	1.02164	0.993248	1.01526	1.01426
0.176	1.01392	0.924477	1.02607	0.962249	1.04556		0.176	1.00439	1.03699	1.00083	1.0277	1.01447
0.177	1.02638	0.983295	1.02615	0.986912	1.01532		0.177	0.991624	1.0187	0.98144	1.01269	1.02079
0.178	1.03207	0.979035	1.00555	0.984346	1.04046		0.178	1.00776	1.02025	1.01333	1.02484	1.01154
0.179	1.02913	0.970992	1.02154	0.974575	1.0396		0.179	0.995569	1.03217	0.983891	1.02845	1.00901
0.18	1.05444	0.966125	1.01278	0.958677	1.03343		0.18	0.984136	1.00921	0.990107	1.00421	1.00351
0.181	1.02264	0.971946	1.01726	0.975286	1.01901		0.181	0.989139	1.01428	0.995569	1.01248	0.990496
0.182	1.03618	0.985409	1.02623	0.974464	1.00767		0.182	0.994843	1.0276	0.974672	1.00687	1.00657
0.183	1.03529	0.964173	1.02313	0.986375	1.0112		0.183	0.98493	1.01899	0.985157	1.02447	1.00763
0.184	1.03038	0.977507	1.03507	0.965688	1.00065		0.184	0.999266	1.02608	0.997996	1.00205	1.01103
0.185	1.02028	0.955946	1.01273	0.977721	1.02135		0.185	0.998677	1.01232	0.984548	1.02469	1.00488
0.186	0.999006	0.959393	1.01271	0.972698	1.02387		0.186	0.994689	1.01687	0.999424	1.0007	1.00908
0.187	1.02995	0.954222	1.0289	0.971065	1.00878		0.187	1.01057	0.999774	0.986504	1.0262	1.02791
0.188	1.03782	0.96207	1.02312	0.96583	1.02231		0.188	1.00928	1.04911	1.00669	1.01897	0.999211
0.189	1.03508	0.96748	1.00724	0.989936	1.00249		0.189	0.99054	1.03032	0.997192	1.00983	1.01906
0.19	1.02332	0.987079	1.02231	0.98465	1.02321		0.19	0.996679	1.03591	1.00678	1.01074	1.02263
0.191	1.02777	0.952791	1.03129	0.966885	1.03311		0.191	1.00219	1.02638	1.00075	1.03008	1.01396
0.192	1.0338	0.954114	1.01387	0.968387	1.01434		0.192	0.983402	1.01576	0.998888	1.00654	1.01117
0.193	1.02932	0.968824	1.02497	0.974494	1.01007		0.193	1.01075	1.01359	1.01316	1.00832	1.01135
0.194	1.02296	0.973236	1.02383	0.982814	1.00416		0.194	1.01521	1.03509	0.992915	1.01766	1.00078
0.195	1.05396	0.961745	1.023	1.00976	1.02238		0.195	0.991086	1.03092	1.00809	1.04223	1.00658
0.196	1.04994	0.979729	1.01259	0.96651	0.995799		0.196	1.0081	1.03918	0.995253	1.01584	1.00897
0.197	1.03636	0.981322	1.02439	0.971714	1.01569		0.197	0.989182	1.01163	1.01317	1.0169	1.02543
0.198	1.00429	0.975425	1.02573	0.972343	0.997307		0.198	0.99217	1.01714	0.988371	1.03238	1.00662
0.199	1.00868	0.975924	1.02544	0.964247	1.01097		0.199	0.990002	1.03933	0.996478	1.00499	1.0193
0.2	1.04526	0.963957	1.01263	0.985502	1.04566		0.2	0.972789	1.00821	1.00294	1.01237	1.0105
0.201	1.02713	0.958016	1.01315	0.962868	1.01331		0.201	0.980003	1.02557	0.985165	1.01409	1.02275
0.202	1.02824	0.96207	1.01715	0.973064	1.02416		0.202	0.98131	1.04816	0.999667	1.02466	1.02766
0.203	1.01696	0.966341	0.998112	0.993172	1.01507		0.203	0.98446	1.03058	0.993053	1.02206	1.00903
0.204	1.03852	0.971003	1.02936	0.99932	1.00428		0.204	1.00729	1.0174	0.997241	1.0149	1.00636
0.205	1.03354	0.978439	1.03091	0.980277	1.03672		0.205	0.990403	1.02478	0.999042	1.0007	1.01365
0.206	1.01869	0.965236	1.0035	0.966895	1.01621		0.206	0.993255	1.031	0.995666	1.03289	1.00427
0.207	1.02587	0.962103	1.05527	0.984132	1.00367		0.207	1.01403	1.0352	1.00408	1.01862	0.988935
0.208	1.04313	0.975469	1.02524	0.981606	1.01972		0.208	0.997737	0.999661	0.988176	1.01914	1.00587
0.209	1.05087	0.966808	1.0305	0.989104	1.00861		0.209	0.983735	1.00149	0.997509	1.01093	1.01106
0.21	1.02583	0.954049	1.00334	0.991407	1.02331		0.21	1.00288	1.0004	1.00183	0.992682	1.01046
0.211	1.00462	0.956119	1.02219	0.972374	1.00541		0.211	1.0028	1.0117	0.997509	1.01698	0.987264
0.212	1.02357	0.958786	1.01397	0.985949	1.0257		0.212	0.998164	1.01232	0.999115	1.00514	1.00604
0.213	1.02583	0.979902	1.02307	0.973449	1.02837		0.213	1.0072	1.01735	0.993037	1.00313	1.00976
0.214	1.0284	0.964347	1.01082	0.954731	1.0323		0.214	0.977894	1.01804	0.991779	0.998963	1.02041
0.215	1.03231	0.937799	1.02849	0.990118	0.992336		0.215	0.989857	1.02252	0.983347	0.993468	1.00997
0.216	1.03286	0.953268	1.01955	0.946198	1.0149		0.216	0.991667	1.0178	0.997517	1.01463	1.00893
0.217	1.01476	0.960108	1.03333	0.98326	1.0129		0.217	0.998258	1.01281	1.00146	1.00979	1.00879
0.218	1.01761	0.951425	1.0082	0.987704	1.01707		0.218	0.988405	1.04042	0.995017	1.0113	0.993468
0.219	1.0148	0.969604	1.00953	0.964643	1.03094		0.219	0.985348	1.01463	0.999813	1.01342	1.0219
0.22	1.00158	0.941973	1.0356	0.973612	1.02613		0.22	0.982326	1.01589	1.00022	1.01671	1.01076
0.221	1.04957	0.968206	0.999401	0.970253	1.01221		0.221	0.985186	1.01176	1.00403	1.01795	0.996079
0.222	1.02844	0.967588	1.01658	0.987967	1.01228		0.222	0.976084	1.00909	0.989718	1.02232	1.0202
0.223	1.04312	0.961734	1.03493	0.971096	1.03581		0.223	0.98832	1.0321	0.996372	1.01625	1.01289
0.224	1.02117	0.951122	1.03305	0.981444	1.02585		0.224	0.984341	1.02299	0.988703	1.02802	0.999379
0.225	1.02583	0.957951	1.02776	0.961914	1.01041		0.225	0.998241	1.02989	1.00209	0.994597	1.01542
0.226	1.02099	0.980206	1.03932	0.962249	1.02447		0.226	0.996175	1.01018	0.984183	1.01276	1.00739
0.227	1.03089	0.954612	1.02164	0.969908	1.0257		0.227	0.992153	1.02369	0.991674	1.03908	1.00498
0.228	1.03337	0.959187	1.00713	0.975742	1.03834		0.228	0.996755	1.01857	1.00936	1.00542	0.99974
0.229	1.03932	0.959447	1.00924	0.97001	1.02196		0.229	0.98043	1.02542	1.00542	1.02323	0.998497
0.23	1.03489	0.96516	1.05096	0.970345	1.01965		0.23	1.00169	1.01328	0.997338	1.00784	1.00472
0.231	1.05347	0.969604	1.02208	0.966672	1.02052		0.231	0.995381	1.02755	1.00072	1.00687	1.01717
0.232	1.01521	0.970276	0.995775	0.972506	1.03015		0.232	0.971892	1.02978	0.988476	1.01104	1.02042
0.233	1.03119	0.960336	1.01719	1.01176	1.03045		0.233	0.983624	1.01476	1.00333	1.01446	1.01806
0.234	1.04204	0.95548	1.01425	0.993852	1.01145		0.234	0.98738	1.02275	0.993913	1.0325	1.01635
0.235	1.02446	0.975154	1.01978	0.955928	1.02358		0.235	1.01413	1.02739	0.964812	1.04603	1.00244
0.236	1.01751	0.968629	1.00325	0.971735	1.02046		0.236	0.995167	1.00786	0.982089	1.01143	1.00986
0.237	1.04299	0.951816	1.0325	0.973287	1.03107		0.237	1.00871	1.02683	1.00597	1.01627	1.01481
0.238	1.0321	0.965355	1.02237	0.974809	1.03762		0.238	0.99784	1.0089	0.993776	1.0215	1.01553
0.239	1.03441	0.960997	1.03456	0.969523	1.02633		0.239	0.976528	1.01449	0.985303	1.00452	1.02554
0.24	1.05788	0.95794	1.02549	0.968275	1.00354		0.24	0.996252	1.0127	0.994433	1.00162	1.01165
0.241	1.03793	0.958146	1.02319	0.986162	1.01665		0.241	0.990762	1.02949	1.01239	1.01094	1.00191
0.242	1.04402	0.963783	1.02064	0.995161	1.03707		0.242	0.989916	1.0087	1.01274	1.02372	1.00495
0.243	1.02798	0.955089	1.0259	0.976676	1.03609		0.243	0.994629	1.02735	0.988476	1.03731	1.01833
0.244	1.01781	0.985789	1.01014	0.967646	1.00857		0.244	0.974838	1.01547	1.01523	1.00926	1.03788
0.245	1.04939	0.97536	1.01857	0.992665	1.01507		0.245	0.991214	1.03018	0.995001	1.00871	1.001
0.246	1.02557	0.964889	1.03985	0.983514	1.02735		0.246	1.00373	1.03048	0.994027	1.02906	1.01082
0.247	1.02518	0.968401	1.0385	0.970091	1.04		0.247	0.990574	1.03741	0.986269	1.01585	1.00897
0.248	0.98858	0.958873	1.00746	0.985208	1.02444		0.248	0.99217	1.01434	0.990481	1.02907	1.0204
0.249	1.02124	0.937008	1.01372	0.97979	1.01878		0.249	1.00549	1.01152	0.989904	1.01572	1.03044
0.25	1.03581	0.969127	1.03471	0.970933	1.02426		0.25	0.985767	1.00887	0.993224	1.02583	1.00479
0.251	1.03614	0.959675	1.02245	0.995394	1.01403		0.251	0.995739	1.04815	1.02341	1.0088	1.01539
0.252	0.99788	0.962493	1.02106	0.984944	1.03181		0.252	0.981805	1.00645	0.98695	1.0121	1.00354
0.253	1.00054	0.953073	1.02829	0.994379	1.01023		0.253	0.992649	1.01703	0.992599	1.0281	0.996549
0.254	1.00957	0.971295	1.02205	0.964602	1.00864		0.254	0.99042	1.02876	0.998547	1.01822	1.0049
0.255	1.03945	0.986222	1.04222	0.951819	1.0218		0.255	0.982676	1.03403	0.975638	1.02313	1.00822
0.256	0.999695	0.975783	1.03044	0.995516	1.02493		0.256	1.00779	1.03323	1.00898	1.01149	1.02174
0.257	1.03051	0.960141	1.01742	0.995698	0.991681		0.257	0.984606	1.02865	0.986772	1.02048	1.00743
0.258	1.04427	0.971588	1.00326	0.98469	0.999646		0.258	0.98908	1.0396	1.00868	1.01012	1.00495
0.259	1.03349	0.981561	1.02064	0.98951	0.998742		0.259	0.999582	1.01096	1.00321	1.02024	1.01842
0.26	1.01076	0.955762	1.02182	0.949831	1.00811		0.26	1.01579	1.0242	0.997776	1.02574	1.01148
0.261	1.02795	0.961962	1.02141	0.978654	1.02081		0.261	0.992777	1.02111	0.996673	1.01334	1.01875
0.262	1.01686	0.960813	1.0066	0.980825	1.02351		0.262	1.01312	1.01966	1.00085	1.03974	1.00418
0.263	1.01925	0.969539	1.0413	0.977051	1.01187		0.263	0.990164	1.02093	0.997371	1.02746	1.00886
0.264	1.02518	0.985507	1.02215	0.98188	1.01058		0.264	0.991769	1.0294	0.973406	1.01782	1.02186
0.265	1.0445	0.965127	1.04061	0.976473	1.02363		0.265	0.991744	1.0222	0.993938	1.00779	1.00401
0.266	1.0421	0.973767	1.02215	0.968843	1.02676		0.266	1.00057	1.01816	1.00363	1.02021	1.00991
0.267	1.02153	0.974992	1.01214	0.965008	1.04362		0.267	0.99918	1.00458	0.987397	1.01312	1.02131
0.268	1.03117	0.980921	1.01405	0.99582	0.988114		0.268	0.978065	1.01958	0.978364	1.01756	1.00611
0.269	1.01945	0.962136	1.00865	0.976026	1.04168		0.269	0.985741	1.02319	1.00347	1.02035	1.01162
0.27	1.01333	0.939198	1.02186	0.986821	1.03283		0.27	1.00907	1.02335	1.0045	1.01391	1.01487
0.271	1.03244	0.959209	1.01255	0.99163	1.01337		0.271	1.01527	1.035	0.995959	1.01363	1.01918
0.272	1.01119	0.956141	1.03661	0.965373	1.01597		0.272	0.988362	1.03457	0.995131	1.01084	1.00859
0.273	1.0224	0.951469	1.01064	0.982682	1.01077		0.273	0.996252	1.0005	0.984703	1.04292	1.02054
0.274	1.01663	0.955783	1.00783	0.973571	1.01109		0.274	0.995099	1.02999	0.996949	1.02896	1.02389
0.275	1.008	0.974894	0.990951	0.959591	1.01423		0.275	0.988337	1.00545	0.997866	1.01279	1.00016
0.276	1.00367	0.961864	1.01994	0.972962	1.0131		0.276	0.994518	1.02531	1.00526	1.01806	1.00992
0.277	1.02453	0.96348	1.03119	0.996987	1.00254		0.277	1.00989	1.02401	0.987908	1.00952	0.990429
0.278	1.0415	0.954233	1.01496	0.982885	1.00289		0.278	1.00287	1.01604	0.982065	1.01847	0.994106
0.279	1.01472	0.970222	1.02848	0.955106	1.01199		0.279	0.993178	1.02819	0.988087	1.01054	1.00713
0.28	1.02154	0.957409	1.02779	0.961823	1.03146		0.28	0.985169	1.02065	0.993102	1.04411	1.00665
0.281	0.992396	0.955198	1.01745	0.987815	1.02876		0.281	1.00686	1.01429	1.00924	1.02042	1.01345
0.282	1.00453	0.965149	1.00837	0.990199	1.02543		0.282	0.986458	1.01516	1.00155	1.02001	1.01161
0.283	1.06356	0.957051	1.03746	0.974028	1.03443		0.283	0.994834	1.01765	1.00013	1.01373	1.01281
0.284	1.03386	0.942266	1.02567	0.985928	1.02915		0.284	1.00626	1.02059	0.999399	1.02165	1.01106
0.285	1.04106	0.955285	1.02105	0.97417	1.03344		0.285	1.00164	1.01955	1.00006	1.01167	1.01195
0.286	1.02766	0.965084	1.01523	0.994684	1.02229		0.286	0.971781	1.03543	0.998888	1.01486	1.00754
0.287	1.02603	0.964509	1.04575	0.968123	1.01387		0.287	1.00762	1.03452	0.990205	1.0287	1.01795
0.288	1.01188	0.958938	1.01378	0.980155	1.01564		0.288	0.986364	1.03276	0.996007	1.01685	1.02107
0.289	1.01268	0.962938	1.01067	0.948217	1.02134		0.289	0.994817	1.01395	1.00277	1.01257	0.998757
0.29	1.04315	0.975252	1.00789	0.97909	1.01172		0.29	0.975273	1.01056	0.990903	1.00948	0.990882
0.291	1.02369	0.963577	1.01578	0.95743	1.01789		0.291	0.986945	1.02339	0.978218	1.0241	0.993359
0.292	1.00839	0.940087	1.03334	0.959925	1.03685		0.292	0.988866	1.00482	1.00134	1.01807	1.00309
0.293	1.04671	0.944661	1.00585	0.985644	1.00929		0.293	0.998156	1.02262	0.985887	1.03063	0.989665
0.294	1.02504	0.939382	1.02595	0.974068	1.00711		0.294	0.976597	1.0076	0.996851	1.02467	1.00622
0.295	1.05424	0.975469	1.01334	0.976422	1.03652		0.295	0.986689	1.02057	1.00459	1.01113	0.994929
0.296	1.04903	0.956943	1.01453	0.98537	1.01905		0.296	0.995876	1.00729	1.00544	1.0211	1.00027
0.297	1.05381	0.963859	1.01822	0.983838	1.01421		0.297	0.991752	1.00971	0.995561	1.00968	1.0209
0.298	1.02614	0.964108	1.03927	0.98956	1.03109		0.298	0.963593	1.02576	0.995772	1.01706	1.02666
0.299	0.976644	0.973236	1.01737	0.98185	1.01928		0.299	0.994476	1.01513	0.991	1.00486	1.02004
0.3	1.02337	0.972748	1.03971	0.953524	1.01718		0.3	1.02413	1.03985	0.98648	1.00969	1.01386
0.301	1.02923	0.958396	1.01095	0.994319	1.00048		0.301	0.99603	1.03604	0.992599	1.00577	1.01784
0.302	1.00273	0.95794	1.01979	0.966763	1.03992		0.302	1.01661	1.01391	0.993394	1.00879	1.00578
0.303	1.02308	0.967241	1.03371	0.993071	1.00789		0.303	1.00774	1.03294	1.00299	1.00875	1.02169
0.304	1.03434	0.968835	1.0298	0.96444	1.02928		0.304	0.969049	1.01955	0.974907	1.02393	1.00787
0.305	1.03272	0.970678	1.02016	0.975174	1.0087		0.305	0.985451	1.01191	0.991235	1.0096	0.99707
0.306	1.02271	0.976347	0.989373	0.981637	1.01656		0.306	0.998284	1.02532	0.988574	1.00964	1.00154
0.307	1.02149	0.976412	1.02344	0.973246	1.01056		0.307	0.995663	1.01853	1.00197	1.02183	1.00961
0.308	1.01775	0.961832	0.997997	0.987105	1.02775		0.308	0.992742	1.03	0.987372	1.01219	1.01064
0.309	1.01645	0.940163	1.02352	0.95048	1.0305		0.309	0.986484	1.03421	1.00537	1.00684	1.00197
0.31	1.02652	0.941659	1.00936	0.978999	1.02107		0.31	0.991931	1.02252	0.986699	1.02345	1.03139
0.311	1.02411	0.966363	1.01537	0.972212	1.00527		0.311	0.999718	1.03364	0.985417	1.01807	1.01258
0.312	1.03291	0.982894	1.02688	0.975225	1.01327		0.312	1.00539	1.01859	1.00043	1.01671	1.01609
0.313	1.0397	0.967924	0.994773	1.01028	1.01706		0.313	0.994245	1.01534	0.989004	1.00525	0.991546
0.314	1.03067	0.976835	1.01283	0.978918	1.02397		0.314	1.01055	1.00613	0.99858	1.01784	1.01058
0.315	1.03258	0.968184	1.03635	0.965221	1.02579		0.315	0.994228	1.01428	0.987486	1.02502	0.994367
0.316	1.02194	0.944607	1.03356	0.979212	1.00078		0.316	0.993724	1.02432	1.00078	1.02289	1.02458
0.317	1.00906	0.955588	0.999827	0.97139	1.00792		0.317	0.985647	1.01303	1.00097	1.0059	1.00515
0.318	1.02055	0.97355	1.04251	0.975215	1.02298		0.318	0.984512	1.03319	1.00341	1.02583	0.988926
0.319	1.02622	0.963588	1.01767	0.957156	1.03652		0.319	0.979952	1.04279	1.0144	1.01899	1.02638
0.32	1.00465	0.960813	1.02223	0.989834	1.02591		0.32	0.991786	1.01663	0.994376	1.01324	0.999916
0.321	1.02491	0.965778	1.01308	0.967392	1.02807		0.321	0.987961	1.01852	0.980223	1.01152	0.992184
0.322	1.03054	0.987079	1.0114	0.973612	1.02113		0.322	0.989003	1.02621	0.987454	0.999724	0.997305
0.323	1.03442	0.972759	1.02114	0.979892	1.01804		0.323	0.995577	1.00803	0.972846	1.02152	1.00946
0.324	1.00846	0.954829	1.02011	0.958951	1.02373		0.324	1.00088	1.02041	0.986423	1.01858	1.02232
0.325	0.998596	0.951642	0.988994	0.973307	1.00829		0.325	1.00486	1.02092	0.98919	1.01578	1.02419
0.326	1.02167	0.959491	1.0156	0.978309	0.998617		0.326	0.974966	1.01383	1.00213	1.0112	1.00139
0.327	1.03059	0.959599	1.02566	0.964471	1.01534		0.327	0.997976	1.02657	1.01468	1.02334	1.00107
0.328	1.02167	0.969203	1.01659	0.979831	1.02422		0.328	0.994501	1.02227	1.00636	1.0089	1.00529
0.329	1.02752	0.950222	1.0264	0.991802	1.01762		0.329	0.999214	1.02792	0.97679	1.00716	1.00468
0.33	1.00287	0.937951	1.03138	0.965982	1.01778		0.33	0.989361	1.02257	0.995715	1.01611	1.00196
0.331	1.00817	0.970883	1.02383	0.980511	1.00865		0.331	0.997054	1.01564	0.988062	0.993886	1.00816
0.332	1.04465	0.973789	1.01151	0.981403	1.04109		0.332	0.985161	1.01059	0.98032	1.00965	1.00771
0.333	1.02741	0.963122	1.02138	0.977781	1.03601		0.333	0.983367	1.01913	0.99453	1.02269	1.00273
0.334	1.01554	0.955133	1.029	0.973541	1.01846		0.334	0.998164	1.03205	0.995999	0.999389	1.00927
0.335	1.03709	0.95381	1.01259	0.977528	1.01238		0.335	1.00465	1.03333	0.985749	1.01127	1.01487
0.336	1.02794	0.978851	1.01369	0.984153	1.01685		0.336	1.01458	1.03474	1.00368	1.03115	1.01801
0.337	1.02557	0.952119	1.0171	0.968387	1.00381		0.337	1.00852	1.02024	0.989028	1.01777	1.01606
0.338	1.04274	0.948499	1.02823	0.971988	1.00671		0.338	1.00659	1.02426	0.992258	1.02509	0.988112
0.339	1.01394	0.958786	1.02272	0.992178	0.997993		0.339	0.992879	0.996592	0.995739	1.00269	0.978482
0.34	1.00558	0.981843	1.03567	0.980237	1.03332		0.34	0.980763	1.01795	0.994311	1.02164	1.01172
0.341	1.04662	0.965041	1.01356	0.975874	1.01866		0.341	1.00797	1.02743	0.990172	1.00767	1.01682
0.342	1.04147	0.981409	1.03513	0.965647	1.02994		0.342	0.98896	1.01879	0.992412	1.01877	1.005
0.343	1.00615	0.967317	1.0274	0.978623	0.995092		0.343	0.982608	1.04068	1.00685	1.02476	1.01576
0.344	1.04488	0.944802	1.01048	0.999087	1.0394		0.344	0.990514	1.01069	0.986042	1.02166	1.01568
0.345	0.985321	0.967469	1.01994	1.0044	1.02612		0.345	0.98376	1.0109	1.0055	0.999473	1.00978
0.346	0.997125	0.962721	1.00728	0.979902	1.02609		0.346	0.986177	1.01048	0.985125	1.01938	1.0169
0.347	1.02273	0.951501	0.976387	0.974271	1.04477		0.347	0.996755	1.03159	1.00526	0.997474	0.993065
0.348	1.03272	0.967902	0.9949	0.989956	1.01359		0.348	1.0028	1.02452	1.00334	1.02193	0.997792
0.349	1.01655	0.962407	1.01791	0.984619	1.0177		0.349	1.00102	1.0226	0.996072	0.989963	1.01257
0.35	1.0305	0.949864	1.00326	0.962969	1.01862		0.35	0.9868	1.02913	0.978673	1.00708	1.01549
0.351	1.02405	0.961875	1.03123	0.958809	1.02383		0.351	0.991026	1.00917	1.01236	1.0141	1.00479
0.352	1.00266	0.988596	1.02471	0.964217	1.01508		0.352	1.00475	1.01564	0.996592	1.02144	1.00273
0.353	1.01493	0.968152	1.03176	0.987531	1.02535		0.353	1.0114	1.02302	0.985603	1.01286	1.00847
0.354	1.04898	0.939978	1.03353	0.975346	1.04004		0.354	0.996918	1.02527	0.997419	1.01642	1.00144
0.355	1.02057	0.942276	1.02739	0.987075	1.01357		0.355	0.979662	1.02813	0.986326	1.01686	1.02119
0.356	1.0234	0.941756	1.00574	0.996926	1.01442		0.356	0.978347	1.02323	0.988046	1.00224	0.994467
0.357	1.03909	0.950493	1.02	0.990484	1.02564		0.357	1.00096	1.04156	1.00174	1.00596	0.999597
0.358	1.04732	0.964509	1.02544	0.987724	1.01893		0.358	0.998788	1.03049	1.00948	0.991845	1.02489
0.359	1.04352	0.957398	1.01423	0.986101	0.998503		0.359	1.00493	1.02534	0.998409	1.00619	1.01096
0.36	1.02116	0.972889	1.04164	0.977183	1.05014		0.36	0.985656	1.03519	0.980807	1.01608	1.01534
0.361	1.03822	0.981832	1.02736	0.978207	1.01785		0.361	0.978449	1.01875	0.987827	0.992088	1.0127
0.362	1.04135	0.969724	1.03378	0.97071	1.01481		0.362	1.01019	1.01379	0.979841	1.00127	1.0052
0.363	0.997297	0.984238	0.995913	0.976797	1.02545		0.363	1.00511	1.02836	1.00118	1.01468	0.999572
0.364	1.01737	0.955957	1.0403	0.981069	1.02733		0.364	0.978116	1.01689	0.998271	1.01273	1.00254
0.365	1.00045	0.987079	1.02442	0.972343	1.01668		0.365	0.989319	1.0095	0.98295	1.01441	1.02267
0.366	0.995125	0.95329	1.04461	0.989682	1.00667		0.366	0.992196	1.02889	1.00132	1.00482	1.0079
0.367	1.02554	0.946851	1.00061	0.981525	1.00768		0.367	0.993622	1.0202	1.00614	1.02047	1.00961
0.368	0.99123	0.954201	1.00443	0.97003	0.99843		0.368	0.988823	1.03711	1.00669	1.017	1.00522
0.369	1.03366	0.961247	1.02145	0.96862	1.01486		0.369	1.00187	1.02216	1.00057	1.01885	1.01406
0.37	1.01277	0.965908	1.0449	0.978644	1.01539		0.37	0.989122	1.02385	0.975135	1.03274	1.01489
0.371	1.02275	0.9671	1.02539	0.979831	1.03581		0.371	0.996875	1.01838	1.00162	1.00955	1.01182
0.372	1.03573	0.958482	1.02835	0.964207	0.999802		0.372	0.994373	1.02458	0.998207	1.01384	1.01666
0.373	1.02749	0.955014	0.990824	0.987815	1.01114		0.373	0.994604	1.02267	0.979468	1.01039	1.00263
0.374	1.00958	0.96193	0.99962	0.995678	1.0273		0.374	0.998446	1.00504	0.967019	1.01613	1.00536
0.375	0.986712	0.93884	1.01993	0.978989	1.00005		0.375	0.996124	1.02842	1.0039	1.01451	0.987272
0.376	1.02347	0.945388	1.02434	0.98678	1.00722		0.376	0.994433	1.01408	0.980499	1.02776	0.999085
0.377	1.02375	0.979436	1.00415	0.971197	1.0054		0.377	0.980242	1.02498	0.982308	1.01898	1.01681
0.378	0.988289	0.949637	1.02719	0.978421	1.03198		0.378	0.982505	1.01418	0.982252	1.01278	0.997481
0.379	1.0431	0.965279	1.00555	0.972851	1.01254		0.379	0.984477	1.0297	0.983558	1.02423	1.00405
0.38	1.02359	0.971837	1.02018	0.979983	1.01153		0.38	0.996465	1.03403	0.98695	1.00272	1.01291
0.381	1.03601	0.95278	1.03704	0.969523	0.989102		0.381	0.99632	1.04775	0.984354	1.01486	1.01186
0.382	1.03581	0.946374	1.02208	0.994095	1.00386		0.382	0.983948	1.00246	0.970882	1.01117	0.982932
0.383	1.02982	0.958482	1.0378	0.974139	1.01855		0.383	0.993494	1.04449	0.983023	1.01219	1.0061
0.384	1.04892	0.959588	1.02474	0.966916	1.02434		0.384	1.00024	1.01373	0.991154	0.997742	1.01071
0.385	1.02133	0.949051	1.0114	0.9728	1.01488		0.385	0.989208	1.02471	0.983071	1.01107	1.00267
0.386	1.03048	0.963079	1.02069	0.959073	1.03458		0.386	0.99112	1.00313	0.985847	1.0028	1.02033
0.387	1.012	0.971534	1.04036	0.977	1.02609		0.387	0.985946	1.02231	0.9848	1.01127	1.01788
0.388	1.01921	0.957984	1.02365	1.00126	1.00889		0.388	0.99965	1.02347	0.993629	1.02916	0.997448
0.389	1.01293	0.963599	1.02012	0.977254	1.00781		0.389	1.00987	1.00686	0.99776	1.01213	0.988372
0.39	1.03643	0.964076	1.02619	0.994004	1.01476		0.39	0.982573	1.02584	0.994035	1.00979	1.00539
0.391	1.01372	0.958688	1.01629	0.979668	1.01326		0.391	0.962415	1.02278	0.992891	1.01438	1.01473
0.392	1.01827	0.949019	1.03254	0.988475	1.02251		0.392	1.00179	1.02876	0.983761	1.00903	1.01962
0.393	1.021	0.967805	1.03212	0.985877	1.03612		0.393	1.00449	1.01269	1.00429	0.988408	1.00145
0.394	1.01391	0.965518	1.01943	0.964095	1.02168		0.394	0.988414	1.01163	1.00432	1.01955	1.01683
0.395	1.02806	0.956412	1.009	0.960849	1.00164		0.395	0.993955	1.01976	0.996413	1.02554	1.01768
0.396	1.00189	0.949496	1.01816	0.967879	1.02258		0.396	0.972114	1.0396	0.998702	1.01812	0.979758
0.397	1.03631	0.963707	1.02708	0.973774	1.02936		0.397	0.991624	1.02075	0.981732	1.00574	1.00918
0.398	1.03244	0.962049	1.00639	0.961336	1.00965		0.398	1.00354	1.01228	0.992225	1.01502	1.02238
0.399	1.01806	0.938114	1.01462	0.978867	1.01526		0.399	0.99252	1.03182	1.00218	1.00298	1.01151
0.4	1.01807	0.955556	1.03705	0.974332	1.0002		0.4	0.959828	1.02731	0.983445	1.02912	1.02226
0.401	1.04113	0.964911	1.01622	0.967311	1.01347		0.401	0.975145	1.01005	0.991081	1.02664	1.01809
0.402	1.00817	0.958992	1.00846	0.97905	1.02183		0.402	1.01104	1.02344	0.9758	1.02292	1.00736
0.403	1.00595	0.963469	1.03372	0.984021	1.02541		0.403	0.988601	1.02019	0.9854	0.996454	0.998354
0.404	0.999603	0.973355	0.990997	0.975164	1.03594		0.404	0.983675	1.02295	0.992599	1.00917	1.00871
0.405	1.04068	0.965821	1.03038	0.964623	1.0074		0.405	1.00447	1.0096	0.977155	1.00524	1.00185
0.406	1.02407	0.956141	1.01526	0.990118	1.01718		0.406	0.997959	1.0084	0.996397	1.02726	1.00123
0.407	1.01364	0.9711	1.0213	0.988972	1.0129		0.407	0.998711	1.00548	0.986821	1.00344	1.02416
0.408	1.03185	0.959285	1.0243	1.00907	1.02041		0.408	1.00114	1.00759	0.977593	1.01396	1.0152
0.409	1.01737	0.961724	1.01894	0.978816	1.01895		0.409	0.999249	1.0331	0.992631	0.998193	1.01555
0.41	1.03047	0.974775	1.01951	0.971796	1.01881		0.41	0.985639	1.01804	0.984524	1.0099	1.01973
0.411	1.00876	0.954211	1.04712	0.980308	1.01772		0.411	0.990275	1.01659	0.999481	1.0095	1.00531
0.412	1.03871	0.974222	1.04004	0.984295	1.01337		0.412	0.993033	1.01616	0.982722	1.00345	1.00305
0.413	1.0357	0.961854	1.01375	0.979425	1.01748		0.413	0.994561	1.01796	0.981213	1.01986	0.994064
0.414	1.00906	0.951469	1.0585	0.973246	0.996163		0.414	0.989233	1.02818	1.00169	1.01831	0.996835
0.415	1.02329	0.985442	1.021	0.969594	1.00581		0.415	0.986791	1.0186	0.999529	1.02539	1.00398
0.416	0.999854	0.979545	1.01407	0.96656	1.00174		0.416	1.00392	1.02344	0.988793	1.01418	1.02821
0.417	1.01357	0.973832	1.03462	0.989662	1.03709		0.417	1.00311	0.999895	0.998702	1.01427	1.00879
0.418	1.03051	0.974027	1.00365	0.975164	1.03085		0.418	1.01349	1.02573	1.01464	1.02963	1.00656
0.419	1.00424	0.967621	1.01506	0.972739	1.02775		0.419	0.997387	1.02445	0.984597	1.01163	1.00974
0.42	1.01733	0.970656	1.03409	1.00501	1.03077		0.42	0.972106	1.02972	0.982325	1.0103	1.00411
0.421	1.00729	0.961984	1.03357	0.981667	1.0107		0.421	0.982292	1.02437	0.977707	1.00313	0.993821
0.422	1.01502	0.979913	0.997168	0.963679	1.00469		0.422	1.00857	1.03246	0.978916	1.00115	0.997171
0.423	1.02805	0.969377	1.03312	0.976818	1.00503		0.423	0.998933	1.00137	0.995228	1.02903	1.00257
0.424	1.01763	0.95097	1.02849	0.984011	1.01054		0.424	1.01335	1.00605	0.989336	1.02179	1.00175
0.425	1.044	0.961615	1.02509	0.978086	1.03171		0.425	1.01025	1.01526	1.00732	1.01604	0.991394
0.426	1.01779	0.961019	1.04192	0.987592	1.04602		0.426	0.990634	1.02741	0.995666	1.02915	1.0049
0.427	1.0381	0.965182	1.00892	0.971055	1.00736		0.427	1.00275	1.04477	0.99031	1.01249	0.993686
0.428	1.05303	0.957919	1.02083	0.967737	1.02571		0.428	0.985946	1.01378	0.981424	1.01416	1.00395
0.429	1.03776	0.959772	1.0395	0.976554	1.03251		0.429	1.01255	1.03017	0.996689	1.01693	0.996356
0.43	1.02799	0.961149	1.02482	0.96092	0.997255		0.43	0.991009	1.03276	0.976587	1.03056	1.00844
0.431	1.01379	0.987989	1.01806	0.972729	1.01273		0.431	0.995714	1.01871	0.97128	1.00609	0.994895
0.432	1.02109	0.953496	1.04081	0.958566	1.02496		0.432	0.985485	1.01046	0.991438	1.0102	1.01507
0.433	0.997059	0.954992	1.03125	0.990098	0.998087		0.433	0.97909	1.01638	0.994108	1.02568	1.01965
0.434	1.04068	0.946201	1.01631	0.981525	1.04636		0.434	0.994228	1.00354	0.997866	1.02754	1.01584
0.435	1.05169	0.957669	1.027	0.977254	0.997307		0.435	0.977135	1.01699	1.00403	1.03046	0.99869
0.436	1.01806	0.970547	1.02681	0.969787	1.00922		0.436	1.00624	1.02882	0.990075	1.00503	1.00492
0.437	1.02083	0.979089	1.04028	0.982925	1.02481		0.437	0.991137	1.02311	0.971044	1.0399	1.00727
0.438	0.992131	0.957561	1.04791	0.962025	1.0097		0.438	1.00096	1.03392	0.994124	1.0123	0.995895
0.439	1.02312	0.952369	1.00936	0.981677	1.01897		0.439	1.00348	1.02054	0.988671	1.01245	0.983687
0.44	1.03346	0.974439	1.02798	0.972709	1.02958		0.44	0.991692	1.01938	0.990253	0.998076	1.01368
0.441	1.03205	0.967252	1.01827	0.966195	1.02903		0.441	0.985306	1.01394	1.0045	1.02093	1.00039
0.442	1.03357	0.979935	1.00697	0.972414	1.02496		0.442	0.974829	1.02181	0.989564	0.997758	1.02064
0.443	1.02428	0.956531	1.01852	0.982032	1.01965		0.443	1.00047	1.02162	0.976238	1.00565	1.01009
0.444	1.01155	0.958558	1.0506	0.962989	1.03039		0.444	0.991855	1.03271	0.994254	1.0185	0.983284
0.445	1.03686	0.977669	1.03238	0.977528	1.04446		0.445	0.99334	1.01981	0.995675	1.00666	1.02243
0.446	1.03549	0.955545	1.00046	0.97349	1.00535		0.446	1.00023	1.01526	0.98609	1.00887	0.994686
0.447	1.02479	0.960683	0.994773	0.985593	1.01995		0.447	0.991385	1.03897	0.984021	1.00092	0.997716
0.448	1.02795	0.951133	1.00951	0.982205	1.02067		0.448	0.992	1.01544	0.983128	1.01518	1.00693
0.449	1.01905	0.95781	1.01974	0.97702	1.02812		0.449	0.997003	1.00643	0.988241	1.00741	0.998338
0.45	1.00224	0.955664	1.01178	0.992472	1.01165		0.45	0.983897	1.03452	0.997346	1.0245	1.00407
0.451	1.03174	0.971122	1.01764	0.973348	1.00944		0.451	0.992205	1.03562	0.996113	1.01309	1.00021
0.452	1.00543	0.944607	0.993415	0.966408	1.02252		0.452	1.00898	1.02474	0.980523	1.00116	1.00015
0.453	1.03254	0.956737	1.00734	0.985614	1.02614		0.453	0.991829	1.03018	0.976108	1.03646	1.0226
0.454	1.01584	0.963718	1.01649	1.00817	1.0207		0.454	1.00384	1.01526	0.988241	1.01515	0.99147
0.455	1.03005	0.971382	1.00531	0.954903	1.02652		0.455	0.980371	1.03403	0.994133	1.00396	0.998657
0.456	1.01828	0.982136	1.02753	0.996277	1.02766		0.456	0.99644	1.02051	0.981351	1.01776	1.01679
0.457	1.01425	0.955057	1.02734	0.970132	1.0167		0.457	1.0175	1.02893	0.998012	1.01871	1.01695
0.458	1.03968	0.960043	1.01622	0.974362	1.03217		0.458	1.00704	1.00962	0.990765	0.99831	1.02097
0.459	1.03452	0.969474	1.03324	0.991681	1.03026		0.459	0.989148	1.02105	1.0091	0.997382	1.00437
0.46	1.01738	0.965214	1.01857	0.993172	1.01074		0.46	0.984776	1.03049	1.00277	1.00842	1.01077
0.461	1.01713	0.963913	1.02308	0.965475	1.0183		0.461	0.983521	1.0339	0.988062	1.0187	0.993359
0.462	1.05446	0.984672	0.997847	0.964126	1.02499		0.462	1.00862	1.01964	0.996665	1.01549	1.02316
0.463	1.02501	0.958894	1.01037	0.959956	1.02029		0.463	0.970304	1.02062	0.983104	1.00897	1.00841
0.464	1.02738	0.971436	1.01414	0.989702	1.00549		0.464	0.988482	1.02583	0.998969	1.01087	0.99958
0.465	0.994489	0.975848	1.01642	0.971796	1.01567		0.465	0.973788	1.03791	1.01496	0.990147	1.00952
0.466	1.00857	0.958894	1.02639	0.97559	1.0203		0.466	0.972012	1.02219	0.990529	1.013	0.99058
0.467	1.02907	0.95858	1.05565	0.970395	0.999407		0.467	0.986125	1.02153	1.00128	1.02156	1.00578
0.468	1.01709	0.957355	1.01965	0.984224	0.985806		0.468	1.01605	1.01303	1.00727	1.0235	1.00717
0.469	1.02826	0.961377	1.02945	0.975468	0.999667		0.469	0.998019	1.00917	0.99862	1.00094	0.991185
0.47	1.02406	0.970678	1.00234	0.959692	1.01922		0.47	0.985656	1.02429	0.984475	1.01551	1.00152
0.471	1.03452	0.979827	1.01315	0.985299	1.03053		0.471	0.99743	1.0083	0.992339	1.01224	1.01787
0.472	1.02748	0.966753	1.01578	0.979628	1.01668		0.472	0.988311	1.0058	0.980182	1.00972	0.996936
0.473	1.02276	0.973648	1.0259	0.970568	1.02786		0.473	1.01953	1.00273	1.00486	1.00381	0.997179
0.474	1.06142	0.947902	1.03216	0.978147	1.0274		0.474	1.00063	1.01556	0.977358	1.02254	1.01676
0.475	1.05772	0.98735	1.01327	0.972059	1.00399		0.475	0.995227	1.02327	1.00063	1.006	0.982226
0.476	1.03723	0.968434	1.01791	0.991336	1.02184		0.476	0.982522	0.997157	0.998491	1.00181	1.00596
0.477	1.02003	0.941973	1.02123	0.974464	1.00907		0.477	0.981942	1.0344	0.990594	1.03548	1.01578
0.478	1.03517	0.956997	1.03297	0.974616	1.00779		0.478	0.998446	1.01324	0.993849	1.00658	1.01212
0.479	1.05069	0.95174	1.01988	0.964044	1.01134		0.479	0.989857	1.02168	0.98863	1.00028	1.00646
0.48	1.02848	0.948813	1.04768	0.98673	1.02933		0.48	1.01446	1.02046	1.01204	1.01659	1.02059
0.481	1.01492	0.966808	1.03595	0.984011	1.02676		0.481	1.00257	1.01505	0.989393	1.00616	1.00588
0.482	1.02491	0.970276	1.02987	0.984417	1.01664		0.482	0.998736	1.0262	1.0051	1.01008	0.989128
0.483	1.03764	0.967285	1.02263	0.985634	1.01808		0.483	0.977519	1.02711	1.00079	1.01536	1.0011
0.484	1.02603	0.946808	1.00472	0.974555	1.00992		0.484	0.998548	1.01343	1.00975	1.00096	1.00134
0.485	1.02616	0.981171	1.01301	0.974697	1.00544		0.485	0.988678	1.02041	0.991146	1.00958	1.00165
0.486	1.01575	0.961203	1.02108	0.992533	1.02384		0.486	0.996422	1.02046	0.988785	1.0038	1.00933
0.487	1.01852	0.976119	1.01089	0.986314	1.03991		0.487	0.997387	1.0088	0.996275	1.00897	1.00007
0.488	1.03013	0.954558	1.03954	0.987714	1.00175		0.488	0.982488	1.01614	0.992834	1.03561	0.99613
0.489	0.99955	0.943317	0.993599	0.997352	1.02153		0.489	0.995073	1.02707	0.995317	1.016	1.00807
0.49	1.01902	0.954667	1.01033	0.969706	1.01777		0.49	0.998873	1.00547	0.991463	1.01681	1.00757
0.491	1.03446	0.94271	1.02744	0.956892	1.0254		0.491	0.992298	1.00204	0.993508	1.02844	1.01888
0.492	1.04356	0.962255	1.01513	0.985076	1.02049		0.492	1.01031	1.02888	1.00459	1.02451	1.00504
0.493	1.02738	0.962905	1.01709	0.990007	1.01538		0.493	0.98283	1.00839	0.978981	1.02625	0.998892
0.494	1.03056	0.944477	1.02928	0.989804	1.01992		0.494	1.01023	1.01825	1.00548	1.02566	1.00679
0.495	1.02602	0.956661	1.04398	0.96721	1.0127		0.495	0.98972	1.01379	0.983656	1.02374	1.02867
0.496	1.04312	0.936661	1.02413	0.985228	1.01423		0.496	0.991983	1.0321	0.985871	1.01802	1.01764
0.497	1.04184	0.955046	1.03287	0.9742	1.012		0.497	0.995569	1.03127	0.990757	1.02336	0.998312
0.498	1.01009	0.979729	1.01567	0.997575	1.01045		0.498	0.988917	1.00952	1.01311	1.01538	1.00322
0.499	1.01127	0.954136	1.02057	0.971461	1.02173		0.499	1.0077	1.00771	0.996088	1.00829	0.990311
0.5	1.03887	0.965637	1.01526	0.984386	1.01524		0.5	0.988619	1.00949	0.994546	1.03847	1.01335
0.501	1.01231	0.940228	1.00883	0.963963	1.00721		0.501	0.985716	1.01789	0.999619	1.00929	1.00493
0.502	1.04235	0.94761	0.998262	0.972556	1.01608		0.502	0.988567	1.02011	0.984337	1.02163	0.998606
0.503	1.02232	0.977561	1.02008	0.970426	1.01905		0.503	0.98756	1.00761	0.990115	1.02095	1.00473
0.504	1.0024	0.956141	1.03131	0.964714	1.00806		0.504	0.983274	1.01641	0.989409	1.01505	0.984737
0.505	1.01623	0.95587	1.00926	0.980653	1.02568		0.505	0.987628	1.0135	0.985904	1.0128	0.996197
0.506	1.01456	0.959447	1.02882	1.01412	1.01098		0.506	0.991223	1.01767	0.990416	1.0009	0.989195
0.507	1.0181	0.968152	0.986472	0.964105	1.03419		0.507	0.981011	1.01216	0.982357	1.01214	1.01937
0.508	1.03515	0.980835	1.02216	0.980998	1.01694		0.508	0.985861	1.02215	0.999984	1.01552	1.02241
0.509	1.04606	0.972954	1.02694	0.994156	0.997483		0.509	0.97424	1.03775	0.967181	1.01726	1.02095
0.51	1.01168	0.957171	1.03133	0.976726	1.017		0.51	0.994971	1.00405	0.996997	0.97633	1.01014
0.511	1.02042	0.957041	1.04669	0.970578	1.02211		0.511	0.997285	1.03146	0.97752	1.02089	1.00414
0.512	1.0372	0.994244	1.03951	0.935231	1.02056		0.512	0.990821	1.01488	0.996941	1.01591	1.00514
0.513	1.01806	0.963577	1.02623	0.969239	0.994821		0.513	0.98487	1.00833	0.968098	1.0053	1.00462
0.514	1.01273	0.978862	1.02044	1.00094	0.999376		0.514	0.995082	1.02498	1.01474	1.01911	1.00402
0.515	1.03479	0.966883	1.02849	0.977244	1.02367		0.515	0.99019	1.02785	1.01247	1.02952	1.00276
0.516	1.02934	0.957984	1.05807	0.9805	1.0249		0.516	0.988149	1.01581	0.984759	1.02639	0.99278
0.517	1.03218	0.949854	1.02625	0.992087	1.02392		0.517	0.991829	1.02528	0.988022	1.0088	1.00456
0.518	1.01392	0.962981	1.01352	0.968539	1.01659		0.518	0.998403	1.01133	0.995983	1.01629	1.0199
0.519	1.03823	0.973507	1.01446	0.985188	1.00345		0.519	1.00019	1.00486	0.993435	1.01179	0.988103
0.52	1.03069	0.952509	1.00662	0.973946	1.03445		0.52	0.992529	1.02666	1.00476	0.996688	1.00211
0.521	1.04386	0.981767	1.02363	0.969706	1.01609		0.521	0.992077	1.0313	0.97171	1.01171	1.00598
0.522	1.00346	0.972531	1.01512	0.981282	1.05052		0.522	0.990044	1.0307	0.999959	0.983849	1.00572
0.523	1.01182	0.951306	1.02346	0.981677	1.02644		0.523	0.996533	1.02727	1.00391	1.00716	1.01415
0.524	1.0358	0.970829	1.01514	1.00727	1.00674		0.524	0.990301	1.00929	0.987608	0.997324	1.0018
0.525	1.02008	0.954352	1.01044	0.981058	1.03269		0.525	0.997797	1.02999	0.989458	1.0015	0.998816
0.526	1.03108	0.953117	1.01515	0.976036	1.00662		0.526	0.998847	1.01922	0.996348	1.01378	1.01744
0.527	1.02044	0.953496	1.03054	0.964876	1.03657		0.527	0.992495	1.02347	0.982471	1.02108	1.01589
0.528	1.03618	0.940911	1.01968	0.986293	1.01484		0.528	0.992358	1.03532	0.986155	1.0155	0.998237
0.529	1.02555	0.954894	1.02647	0.961011	1.00913		0.529	0.996286	1.02294	0.981919	1.01894	1.03392
0.53	1.0336	0.955957	1.00913	0.988728	1.01389		0.53	0.980507	1.02834	0.991308	0.987839	1.00822
0.531	1.05681	0.969821	1.01239	0.976219	0.996808		0.531	0.993596	1.02353	0.986975	0.995433	1.00571
0.532	1.02448	0.952813	1.0071	0.980196	1.0116		0.532	1.00819	1.01643	0.993321	1.00406	1.0172
0.533	1.03715	0.968087	1.02539	0.970507	1.01564		0.533	1.00161	1.01142	0.993646	1.01412	1.0107
0.534	1.00646	0.952434	1.01672	0.994806	1.03926		0.534	0.998164	1.01469	1.00717	1.01788	1.00241
0.535	1.01268	0.974103	1.01679	0.955938	1.01495		0.535	0.992717	1.01667	0.99393	1.0053	0.999312
0.536	1.00571	0.943707	1.01973	0.968123	0.998919		0.536	0.978193	1.02426	0.977602	1.01337	1.00517
0.537	1.01669	0.943425	1.00767	0.979151	1.00913		0.537	0.989746	1.01308	0.993207	1.01228	1.01891
0.538	1.03149	0.9431	1.00073	0.979689	1.01049		0.538	0.976315	1.01479	0.96986	1.02395	0.998883
0.539	1.06816	0.948477	1.01455	0.977568	1.03365		0.539	0.980208	1.02811	0.985538	1.0017	0.997196
0.54	0.988792	0.941008	1.01313	0.963913	1.00474		0.54	0.971218	1.03037	0.990862	1.0173	1.02273
0.541	0.996874	0.957745	1.00623	0.982469	1.0241		0.541	1.01076	1.01744	0.987868	1.01026	0.99016
0.542	1.01565	0.959176	1.02847	0.967047	1.01138		0.542	0.996055	1.01765	1.00286	1.01072	1.02086
0.543	1.02336	0.939751	1.03669	0.984559	1.01937		0.543	0.975589	1.01995	0.981034	1.00146	1.01376
0.544	1.04465	0.972434	1.04031	0.961721	1.02745		0.544	0.99334	1.02594	1.01811	1.01701	1.00052
0.545	1.01592	0.967588	1.02531	0.970548	1.02306		0.545	0.992862	1.03433	0.984646	1.01056	1.006
0.546	1.0301	0.969008	1.00033	0.993172	1.00788		0.546	1.00172	1.02709	0.979533	0.998704	0.989254
0.547	1.02411	0.964889	1.03209	0.978258	1.01097		0.547	0.974095	1.0321	0.991	1.01902	0.999295
0.548	1.00929	0.977453	1.02649	0.970416	1.00141		0.548	0.983948	1.02044	0.978486	1.01201	1.0117
0.549	1.05144	0.950829	1.01022	0.973226	1.01745		0.549	0.99106	1.02289	0.994644	1.02067	0.983905
0.55	1.03662	0.958309	1.02455	0.97418	1.02905		0.55	0.967512	1.0328	0.986115	0.994856	0.983687
0.551	1.02007	0.952076	1.00436	0.982205	0.991806		0.551	0.980934	1.04048	1.00988	1.00813	1.00795
0.552	0.995125	0.951892	1.01119	0.990605	1.05221		0.552	1.00147	1.01534	0.981619	1.00085	0.999505
0.553	1.02719	0.975599	1.01106	0.98396	1.02073		0.553	0.990659	1.01097	1.00323	1.00141	0.998002
0.554	1.01782	0.969745	1.00289	0.975275	1.02829		0.554	0.987022	1.02356	0.978324	1.02068	0.985543
0.555	1.0138	0.954645	1.02026	0.9819	1.01274		0.555	0.967102	1.01497	0.97511	0.997842	0.995844
0.556	1.02771	0.976965	1.01385	0.967707	1.0257		0.556	0.987261	1.01345	1.01006	1.02062	0.989161
0.557	1.03699	0.971447	1.02832	0.959043	0.999563		0.557	0.974693	1.01558	0.999708	1.00524	0.998816
0.558	1.01892	0.985453	1.02684	0.985137	1.01243		0.558	0.989361	1.02663	1.00545	1.01521	1.01792
0.559	1.02606	0.984943	1.02487	0.992705	1.03291		0.559	0.975734	1.02982	0.990375	1.01455	1.01825
0.56	0.997735	0.965669	1.01097	0.997169	1.02212		0.56	1.02083	1.01057	0.988379	1.01963	1.00411
0.561	1.01546	0.954461	1.02475	0.986212	1.01423		0.561	0.96939	1.02008	0.973747	0.997717	0.999076
0.562	1.0356	0.980499	1.03313	0.990595	1.01299		0.562	1.00423	1.0051	0.987372	1.01496	1.0039
0.563	1.0164	0.971837	1.02015	0.981758	1.01635		0.563	0.998796	1.01974	0.999399	1.01896	1.00657
0.564	1.0363	0.964867	1.02777	0.964663	1.00578		0.564	1.00003	1.01194	0.987243	1.01094	1.00918
0.565	1.01981	0.954537	1.02324	0.962644	1.02435		0.565	0.984623	1.01176	0.990262	0.991285	1.01477
0.566	1.01869	0.950797	0.990064	0.988424	1.02581		0.566	0.98026	1.00216	0.985514	1.00841	1.01619
0.567	1.0194	0.965973	1.01347	0.956689	1.02036		0.567	0.984196	1.01937	0.969762	1.0012	0.976736
0.568	1.05187	0.961756	1.01338	0.983869	1.00606		0.568	0.984247	1.03547	0.980694	1.00958	1.01358
0.569	1.03258	0.953951	1.01097	0.992665	1.03886		0.569	0.976443	1.01009	1.0048	1.02499	0.99665
0.57	1.02305	0.966927	0.998054	0.979263	1.00175		0.57	0.998318	1.02084	0.984118	1.0063	1.00871
0.571	1.03452	0.967122	1.01941	0.965008	1.02679		0.571	1.01102	1.0069	0.971491	1.00457	1.0086
0.572	1.01005	0.957745	1.0214	0.984061	1.00983		0.572	0.972737	1.03428	0.980239	1.01592	1.01502
0.573	1.01697	0.953192	1.02003	0.976645	1.01435		0.573	0.995517	1.03256	0.994498	1.01663	0.998312
0.574	1.02888	0.962612	1.02341	0.971714	1.01461		0.574	0.996781	1.01713	0.999099	0.994957	1.01374
0.575	1.03043	0.959122	0.996166	0.967971	1.01431		0.575	1.00776	1.03002	0.977358	1.03817	0.996423
0.576	1.03712	0.952369	0.997076	0.968387	1.01523		0.576	0.996286	1.0275	0.992274	1.01464	0.999983
0.577	1.02713	0.963946	1.03004	0.979192	0.997203		0.577	0.995441	1.02461	0.98622	0.997432	1.02101
0.578	1.06572	0.968423	1.00878	0.968458	1.02465		0.578	1.00791	1.01558	0.98958	0.999958	1.00808
0.579	1.04094	0.956802	1.01142	0.981018	1.01862		0.579	0.997234	1.02167	0.975492	1.01122	0.994241
0.58	1.03548	0.94852	1.02683	0.977802	1.03669		0.58	1.00233	1.02452	0.978957	1.01849	1.00491
0.581	0.999603	0.982775	1.02704	0.990686	0.988998		0.581	0.983274	1.02249	1.00108	1.00851	1.01595
0.582	1.00469	0.934786	1.00289	0.98463	1.00035		0.582	1.01212	1.02491	0.990586	1.01877	1.00814
0.583	1.04637	0.931989	1.01615	0.956151	0.988062		0.583	0.97909	1.0139	0.993094	1.02449	1.00024
0.584	1.03145	0.952444	1.02887	0.967778	1.01721		0.584	0.999454	1.01468	0.991325	1.01863	0.997196
0.585	1.02655	0.967599	1.0366	0.987318	1.0325		0.585	1.00461	1.0243	0.991568	1.0183	1.01321
0.586	1.04006	0.965008	1.02937	0.989215	1.01201		0.586	0.995432	1.03396	0.988906	1.01688	0.998103
0.587	1.02492	0.958146	1.00793	0.966905	1.00811		0.587	0.988456	1.02964	1.00555	1.00749	1.01869
0.588	1.00538	0.958168	1.03401	0.970872	1.0181		0.588	0.985084	1.02096	0.990822	1.02243	1.00502
0.589	1.02284	0.956553	1.00997	0.974788	1.01323		0.589	1.00517	1.01895	0.994595	1.00491	0.988951
0.59	1.08006	0.960835	1.02596	0.966337	1.00866		0.59	0.99083	1.01669	0.98579	0.999448	0.99953
0.591	1.01391	0.956835	1.03339	1.00701	1.01728		0.591	0.997737	1.01525	0.968691	1.01987	1.01386
0.592	1.03965	0.97484	1.01734	0.978025	1.01666		0.592	1.00375	1.01368	0.98118	0.999406	1.01008
0.593	1.01133	0.964423	1.00806	0.985766	1.00532		0.593	1.00313	1.01568	0.989921	1.01807	0.983234
0.594	1.01161	0.940314	1.01719	0.981698	1.03973		0.594	0.98703	1.01648	0.990521	1.01047	0.994769
0.595	1.03169	0.951805	1.02364	0.95953	1.0147		0.595	0.975734	1.01906	0.99436	0.984953	0.991344
0.596	1.02296	0.962743	1.05362	0.984579	1.01323		0.596	0.999718	1.01531	0.992583	1.00094	1.00761
0.597	1.03507	0.975805	1.02219	0.972729	1.01545		0.597	0.9979	1.02828	1.00483	0.999088	1.02173
0.598	1.01598	0.975718	1.03272	0.968955	1.0102		0.598	1.0047	1.0277	0.995098	1.00481	1.01494
0.599	1.0473	0.987014	0.996834	0.97841	1.02649		0.599	0.992435	0.997779	0.988728	1.01039	1.01261
0.6	1.03133	0.964098	1.01005	0.979121	1.02012		0.6	0.975435	1.01724	1.00343	1.01306	0.995198
0.601	1.00166	0.971111	1.02616	0.981241	1.00248		0.601	1.00482	1.02332	0.990968	1.01705	1.00282
0.602	1.03337	0.940618	1.02389	0.968508	0.995653		0.602	0.980208	1.04255	0.993995	1.00218	0.99984
0.603	1.04695	0.951447	1.03954	0.967058	1.01484		0.603	0.981557	1.04053	0.989101	1.01742	1.01063
0.604	1.03727	0.967317	1.02153	0.997281	1.01457		0.604	1.00707	1.01035	0.989539	1.00161	1.00928
0.605	1.02999	0.942645	0.995947	0.969635	0.998149		0.605	0.991539	1.00908	0.988955	0.989202	0.990966
0.606	1.01533	0.945431	1.03216	0.964207	1.01401		0.606	0.986544	1.02207	0.969194	1.00967	0.983956
0.607	1.02856	0.959425	1.04811	0.976747	1.02852		0.607	0.982676	1.00529	0.981018	1.00916	1.00071
0.608	1.01415	0.955805	1.00327	0.982428	1.00607		0.608	1.00109	1.03013	0.996462	1.00281	1.00994
0.609	1.00421	0.988748	1.01703	0.974281	1.02595		0.609	0.993101	1.02682	1.00641	1.00607	1.01672
0.61	1.02868	0.964401	1.01931	0.995059	1.00187		0.61	0.983282	1.01622	0.999197	1.02679	0.988851
0.611	0.983997	0.974927	1.01723	0.972536	1.00344		0.611	0.979397	1.02372	0.994757	1.01032	1.00517
0.612	0.980261	0.97032	1.02571	0.974586	1.02234		0.612	0.978202	1.01994	0.98437	1.01007	1.01057
0.613	1.01015	0.977171	1.02014	0.970497	1.022		0.613	0.985417	1.03067	0.994863	1.01602	0.972496
0.614	1.01064	0.957843	1.01642	0.998955	0.997255		0.614	0.984025	1.01874	1.00272	1.01076	1.01188
0.615	0.998887	0.95148	1.00098	0.985918	1.0041		0.615	0.979944	1.01556	0.992225	1.01663	1.00615
0.616	1.02794	0.966862	1.0368	0.981951	1.01718		0.616	0.994254	1.02792	0.981051	1.01117	1.01231
0.617	0.991005	0.962266	1.01045	0.981271	1.02207		0.617	0.993946	1.01403	0.998125	1.00815	1.01259
0.618	1.02206	0.968379	1.03612	0.957419	1.01893		0.618	0.978185	1.02815	0.990862	1.03116	0.988145
0.619	1.037	0.966363	0.993979	0.989763	1.05587		0.619	0.998472	1.00583	0.994498	1.00962	1.00185
0.62	0.998265	0.970862	1.00946	0.982489	1.04083		0.62	1.00079	1.03222	0.992485	1.00984	0.994828
0.621	1.00456	0.965821	1.01727	1.00505	1.0028		0.621	0.99953	1.00369	1.00368	0.998971	0.993132
0.622	1.03337	0.986461	1.02957	0.987886	1.01636		0.622	0.992828	1.00915	0.987048	1.00313	1.00683
0.623	1.01051	0.972369	1.00623	0.989185	0.994031		0.623	0.996704	1.00907	1.02085	1.02074	1.00907
0.624	1.03762	0.980585	0.997928	0.987978	1.0335		0.624	1.00114	1.00482	1.00489	1.00113	1.01563
0.625	1.03221	0.949897	1.00267	0.980602	1.03211		0.625	0.9868	1.02828	0.984216	1.01494	0.992259
0.626	1.01039	0.961409	1.01406	0.965647	1.03974		0.626	0.98154	1.01463	0.988087	1.0098	1.0095
0.627	1.04882	0.970309	1.0359	0.977091	1.01174		0.627	1.00008	1.03668	0.965704	0.987948	0.99864
0.628	1.02522	0.966526	1.01581	0.977122	1.01792		0.628	0.986305	1.02478	0.991544	1.01028	0.99456
0.629	1.01653	0.956943	1.02231	0.953858	1.01899		0.629	0.97862	1.01657	0.991511	0.994237	0.989178
0.63	1.04519	0.966222	1.01385	1.00763	1.03652		0.63	0.982727	1.00964	1.00502	1.0077	0.994568
0.631	1.01982	0.966808	1.01913	0.970345	1.01834		0.631	0.991863	1.0234	0.99186	1.01888	0.995584
0.632	1.01741	0.984726	1.02913	0.97981	1.01849		0.632	0.981037	1.02478	0.992623	0.995007	0.994702
0.633	1.046	0.935393	1.02221	0.97771	1.00141		0.633	1.00544	1.02848	0.98945	0.992548	1.00309
0.634	1.04488	0.949398	1.01859	0.988515	1.01106		0.634	0.981344	1.00713	1.00218	1.0118	0.99984
0.635	1.02864	0.975707	1.00805	0.981992	1.0284		0.635	1.02075	1.01545	0.987178	1.02168	0.981059
0.636	1.03117	0.934678	1.01857	0.969695	1.02282		0.636	0.983103	1.01762	0.985741	1.03414	0.993653
0.637	1.02471	0.970233	0.994773	0.993679	1.00926		0.637	1.00043	1.02849	0.971872	1.01018	1.01538
0.638	1.01815	0.945637	1.01271	0.971846	1.00793		0.638	0.976409	1.01134	0.983006	1.04097	0.993409
0.639	1.01388	0.955046	1.02345	0.965597	1.01845		0.639	0.992222	1.01885	0.973146	1.02629	0.993686
0.64	1.01538	0.971285	1.02671	1.00107	1.02012		0.64	1.0044	1.02646	0.994198	1.0137	0.989228
0.641	1.0241	0.962309	1.01822	0.993842	1.01343		0.641	1.01303	1.01131	0.984256	1.01088	0.998338
0.642	1.03507	0.949344	1.01691	0.980632	1.0291		0.642	1.00131	1.02107	0.995123	1.00666	1.01112
0.643	1.00684	0.932054	1.02521	0.988333	1.00035		0.643	0.990975	1.01325	0.99772	1.00924	1.00141
0.644	1.01741	0.951046	1.02971	0.986578	1.02552		0.644	1.00249	1.04323	1.00355	1.02798	0.992763
0.645	1.03039	0.962797	1.02444	0.989479	1.01166		0.645	0.989063	1.01242	0.979614	1.01225	1.0006
0.646	1.05005	0.968076	1.02581	0.98463	0.97626		0.646	1.003	1.02243	0.975759	1.01513	1.00672
0.647	0.996768	0.955371	0.987969	0.984751	1.01411		0.647	0.996943	1.02277	0.997768	1.00232	1.00373
0.648	1.03271	0.967967	1.01318	0.97977	1.02		0.648	0.994484	1.02344	0.987632	1.02845	1.01397
0.649	1.04691	0.968249	1.03897	0.950987	1.04053		0.649	0.988004	1.02921	0.981229	1.01694	1.01114
0.65	0.992767	0.983046	1.01969	0.993172	1.00628		0.65	1.01381	1.02585	0.985019	0.995191	1.00047
0.651	0.998953	0.966266	1.00456	0.968123	1.013		0.651	0.991564	1.02855	0.98945	1.00854	0.978977
0.652	1.01244	0.968661	1.02864	0.963182	1.03763		0.652	0.972396	1.02406	0.993321	1.03315	1.01051
0.653	1.02411	0.947588	1.02176	0.968153	1.01815		0.653	0.994245	1.03358	1.00272	0.997616	1.00646
0.654	1.00383	0.952293	0.999413	0.973216	1.02329		0.654	0.988644	1.01724	0.994376	1.02618	0.992175
0.655	1.05213	1.00006	1.02096	0.970852	0.998492		0.655	0.992478	1.01785	0.998945	1.02935	1.00275
0.656	1.03439	0.944434	1.00023	0.98187	0.999782		0.656	0.989063	1.02151	1.01053	1.0095	0.997532
0.657	1.00548	0.966298	1.02934	0.961244	1.01368		0.657	1.00195	1.04944	0.988728	1.02016	1.0126
0.658	1.04004	0.969713	1.02	0.985786	1.01665		0.658	1.00218	1.03675	0.978259	1.00974	1.0039
0.659	1.04271	0.96993	1.01964	0.942019	1.00432		0.659	1.00026	1.00984	1.00168	1.0196	0.994333
0.66	1.02467	0.969182	1.0386	0.993334	1.00968		0.66	0.991872	1.0155	1.00135	1.00997	1.00181
0.661	1.04137	0.941583	1.0154	0.96231	1.01768		0.661	0.987005	1.02965	0.972789	1.01339	1.00396
0.662	1.0089	0.957995	1.02611	0.969249	1.01632		0.662	0.991342	1.01477	0.982511	1.00192	0.99257
0.663	1.04483	0.957821	1.00436	0.981393	1.02407		0.663	0.998839	1.00071	0.996324	1.04197	1.01969
0.664	1.03515	0.96232	1.01309	0.978055	1.00799		0.664	0.987039	1.02705	1.00419	1.01218	0.992561
0.665	1.02771	0.945366	1.0208	0.964531	1.00807		0.665	0.989199	1.02186	0.991795	0.994555	1.00531
0.666	1.02423	0.953919	1.05267	0.959093	1.02297		0.666	0.982599	1.03579	0.983899	1.02071	1.00765
0.667	1.03395	0.957322	1.03853	0.983788	1.03919		0.667	1.01483	0.99874	0.995244	1.01818	0.996969
0.668	1.02077	0.961745	1.02885	0.977112	1.02037		0.668	0.973241	1.00865	0.986707	0.994028	1.00023
0.669	0.994727	0.965041	1.0075	0.986537	1.01895		0.669	0.991103	1.02239	0.972456	1.01782	1.00479
0.67	0.997695	0.957767	1.02349	0.967768	1.04384		0.67	0.991752	1.02583	1.0014	1.02444	0.998413
0.671	1.0215	0.974667	1.02642	0.966002	0.995653		0.671	0.986817	1.01353	0.982398	1.00907	0.984518
0.672	1.05617	0.961745	1.02574	0.966916	1.00857		0.672	1.00587	1.03533	0.971823	1.02212	0.984317
0.673	1.02249	0.967718	1.01309	0.955847	1.0133		0.673	0.97792	1.01879	0.998418	0.999783	1.00444
0.674	1.02828	0.97136	1.00328	0.982945	1.01885		0.674	0.995893	1.01708	0.988971	1.03055	1.00139
0.675	1.03205	0.970114	1.00336	0.955076	1.02092		0.675	0.991223	1.01173	0.985149	0.986894	0.98896
0.676	1.02088	0.950547	1.02832	0.962969	1.00572		0.676	0.963157	1.0031	0.986788	1.01173	0.998707
0.677	1.03279	0.947241	1.0147	0.95953	1.00927		0.677	0.997883	1.00942	0.975151	1.00884	0.983578
0.678	1.03422	0.96619	1.02123	0.978289	1.02632		0.678	0.988209	1.0155	0.982195	0.999389	1.00606
0.679	1.02079	0.955165	1.04277	0.985218	1.01052		0.679	0.994134	1.01842	0.981984	1.02716	0.99435
0.68	1.03464	0.977463	1.02638	0.967534	1.02521		0.68	0.980994	1.01885	1.00034	0.988818	1.01068
0.681	1.02855	0.946949	1.01288	0.987623	0.998045		0.681	1.01347	1.00686	0.993589	1.00707	0.997515
0.682	1.0312	0.945084	1.00259	0.986628	1.04064		0.682	1.00203	1.00792	0.991268	1.00003	0.978557
0.683	1.00817	0.956325	1.02672	0.962634	1.02027		0.683	1.00197	1.02548	0.972505	0.998896	1.01555
0.684	1.02446	0.944184	1.01688	0.968072	1.02574		0.684	1.0079	1.01369	0.982528	1.01182	1.01798
0.685	1.03737	0.969377	1.02557	0.988109	1.01876		0.685	0.989421	1.02335	0.985222	1.01748	0.999429
0.686	1.01041	0.927285	1.04328	0.967545	1.03635		0.686	0.999906	1.0147	0.990042	1.01055	0.995617
0.687	1.03916	0.954092	1.01652	0.964075	1.02142		0.687	0.97763	1.0229	0.973617	1.01059	1.00034
0.688	1.02769	0.957388	1.02931	0.976858	1.00957		0.688	1.00895	1.01173	0.980913	0.990632	0.995659
0.689	1.02383	0.965919	1.02285	0.982682	1.01584		0.689	0.99416	1.01812	0.993508	1.00221	1.01305
0.69	1.02945	0.963859	1.04178	0.987947	1.009		0.69	0.989506	1.03099	0.986561	1.0129	0.993443
0.691	1.02787	0.966081	1.03592	0.972597	1.00972		0.691	0.985519	1.00634	0.994936	1.01337	1.00679
0.692	1.04618	0.960477	1.0172	0.964815	1.00388		0.692	0.994399	1.01076	1.00065	1.016	0.997943
0.693	1.0272	0.944238	0.994877	0.962705	1.03071		0.693	1.00859	1.01987	0.999635	1.0062	0.996004
0.694	1.05073	0.96735	0.995257	0.970497	1.01074		0.694	1.00583	1.01554	0.991211	1.01603	1.01117
0.695	1.03679	0.96671	1.00897	0.983757	1.0235		0.695	0.994279	1.04155	0.97929	1.00171	1.02536
0.696	1.04515	0.953984	1.01256	0.971785	1.00237		0.696	1.01073	1.02307	0.995171	1.01859	1.00491
0.697	1.03543	0.970211	1.01683	0.970101	0.993802		0.697	0.99696	1.01988	1.00959	0.9978	0.997364
0.698	1.0141	0.966027	0.993864	0.966885	1.04093		0.698	0.995799	1.01202	0.996762	1.00436	1.01516
0.699	1.04052	0.965388	1.02	0.976605	1.01897		0.699	1.00934	1.01765	0.990854	1.0257	0.987684
0.7	1.03095	0.940336	1.01809	0.972059	1.00998		0.7	0.98043	1.01711	1.00459	0.996253	0.997775
0.701	1.01502	0.961225	1.01895	0.965688	0.99634		0.701	0.994203	1.00744	0.987105	1.02842	1.00243
0.702	1.03504	0.965919	1.01667	0.964491	1.01767		0.702	0.973361	1.00993	0.986731	1.01655	0.981143
0.703	1.04565	0.98465	1.02292	0.988728	1.02297		0.703	0.995927	1.019	0.986415	1.0109	0.98681
0.704	1.01661	0.949962	1.01781	0.984954	1.02951		0.704	0.991137	1.02357	0.991576	1.00906	1.00899
0.705	1.029	0.959772	1.0171	0.992939	1.02442		0.705	0.979892	1.01264	0.992802	1.04194	1.00722
0.706	1.03998	0.957724	1.04221	0.985147	1.00392		0.706	0.980003	1.01626	0.998913	1.00308	1.0187
0.707	1.04291	0.969474	1.01314	0.963456	1.01099		0.707	0.993801	1.0315	0.996535	1.00017	1.01426
0.708	1.02752	0.968054	0.970101	0.972039	1.02846		0.708	0.981822	1.00594	0.975881	0.994405	0.995122
0.709	1.05189	0.973832	1.03029	0.971461	1.03324		0.709	0.992	1.01715	0.984475	0.99867	1.00853
0.71	1.02418	0.947566	1.04876	0.971948	1.00744		0.71	0.989592	1.03824	0.97692	1.01142	1.01438
0.711	1.02868	0.965767	1.01834	0.965313	1.01961		0.711	0.997174	1.03237	0.978908	1.00558	0.988708
0.712	1.02737	0.945453	0.996178	0.988373	1.01012		0.712	0.996081	1.0216	0.994725	1.01427	1.00469
0.713	1.02408	0.948889	1.00077	0.971714	1.0189		0.713	0.995739	1.0273	0.9823	0.991737	0.983234
0.714	0.989852	0.961962	1.0184	0.978948	1.03462		0.714	0.99007	1.00877	0.992988	1.01096	0.979884
0.715	1.01648	0.940672	1.01041	0.961488	1.0158		0.715	1.00215	1.02265	0.996202	1.01895	0.996667
0.716	1.02993	0.94684	1.01172	0.956314	0.989934		0.716	0.989336	1.0162	1.0074	1.00493	0.986794
0.717	1.02689	0.957886	1.01217	0.962654	1.01045		0.717	0.992811	1.02578	0.988671	1.01839	1.00326
0.718	0.992926	0.972997	1.01394	0.955553	1.02839		0.718	0.996431	1.03554	0.989653	1.00761	0.997582
0.719	1.04513	0.966049	1.01143	0.961924	1.03144		0.719	1.01568	1.01708	0.983712	1.0035	0.987406
0.72	1.03346	0.95536	1.00549	0.983412	1.03327		0.72	0.98096	1.01435	0.980986	1.01139	0.988666
0.721	1.04347	0.962883	1.01345	0.976168	1.01338		0.721	0.995526	1.03664	0.994514	0.998796	1.00012
0.722	1.02911	0.960943	1.03835	0.97701	1.0171		0.722	0.991522	1.04061	0.99423	1.01855	0.998724
0.723	1.01681	0.970678	1.01399	0.989591	0.985369		0.723	0.996277	1.00754	0.99604	1.00994	0.993149
0.724	1.03776	0.961171	1.00397	0.98186	1.01716		0.724	0.977929	1.02714	0.989515	1.00542	1.00144
0.725	1.02969	0.975827	1.0325	1.00016	1.0247		0.725	1.00809	1.02012	0.974339	1.01639	1.00217
0.726	1.02969	0.94852	1.02367	0.964085	1.02331		0.726	0.987842	1.00187	0.988387	1.00491	0.99236
0.727	1.03283	0.974407	1.00703	0.97907	1.02446		0.727	0.993204	1.01952	0.994676	1.0285	0.995844
0.728	1.03527	0.946385	0.996212	0.957612	1.01732		0.728	0.981506	1.01429	0.966443	1.00606	0.995895
0.729	1.02832	0.956336	1.01173	0.982874	0.999178		0.729	1.01662	1.0258	0.991592	1.01904	0.991655
0.73	1.00213	0.960921	1.04287	0.999472	1.01585		0.73	0.985092	1.00212	0.987437	0.993761	0.999715
0.731	1.01847	0.96207	1.01365	0.988982	1.02718		0.731	1.0009	1.00158	0.997306	1.01337	1.00452
0.732	0.99743	0.984043	1.01811	0.972181	1.00005		0.732	0.988362	1.00655	0.989913	1.00855	1.00649
0.733	1.02228	0.951913	1.02604	0.96933	0.999137		0.733	1.00309	1.02866	0.984759	1.02355	0.990018
0.734	1.02141	0.975404	1.00722	0.977842	1.00861		0.734	0.988106	1.0212	0.993597	1.01878	1.01117
0.735	1.02096	0.960878	1.02984	0.96444	1.01939		0.735	0.993195	1.03087	0.999018	1.00179	0.993586
0.736	1.00978	0.966894	1.01915	0.996946	1.03263		0.736	1.00328	1.02625	0.981099	1.01705	0.989245
0.737	1.02234	0.959241	1.02221	0.972039	1.016		0.737	0.99492	1.00943	1.00034	1.02451	1.01514
0.738	0.997655	0.956596	1.02315	0.987237	1.01607		0.738	0.980686	1.02568	0.989231	1.0175	0.993989
0.739	1.0173	0.977518	1.01677	0.958667	1.00841		0.739	1.01011	1.02918	0.996876	1.01328	0.998522
0.74	1.03248	0.95007	1.03736	0.968721	1.02373		0.74	1.00318	1.01571	0.98622	1.0102	0.996062
0.741	1.04691	0.950201	1.02215	1.00255	1.00876		0.741	0.975623	1.01073	0.991885	0.994689	1.0051
0.742	1.05343	0.955631	1.01623	0.98748	1.00439		0.742	1.00396	1.01079	0.988281	1.01035	0.994442
0.743	1.02218	0.943306	1.02752	0.974728	1.01169		0.743	0.996303	1.01164	0.995731	0.997198	0.994081
0.744	1.00688	0.960813	1.01915	0.982134	1.02665		0.744	0.992614	1.01356	0.974542	1.01965	0.986584
0.745	1.00134	0.960488	1.01965	0.970122	1.00517		0.745	0.997635	1.02249	0.984548	1.01258	1.00706
0.746	1.043	0.931447	1.01416	0.98324	1.01641		0.746	0.987116	1.00619	0.976749	1.00156	0.98095
0.747	1.03058	0.972672	1.011	0.995191	1.00621		0.747	0.989771	1.01283	0.994311	0.996805	0.997448
0.748	1.01382	0.946125	1.01882	0.967859	1.0249		0.748	0.99293	1.0293	0.991114	1.00969	0.996323
0.749	1.05273	0.970547	1.02491	0.948177	1.03267		0.749	0.980584	1.0265	0.987088	0.999415	0.99932
0.75	1.02057	0.962645	0.996604	0.983392	1.02616		0.75	1.00178	1.02214	0.98566	1.01219	0.987549
0.751	1.04369	0.984997	1.03023	0.970953	1.01776		0.751	0.992256	1.02601	0.992144	1.00013	1.01548
0.752	1.02215	0.984542	1.01453	0.959824	1.01116		0.752	1.00493	1.02571	0.983217	1.00307	1.00055
0.753	1.01167	0.959198	1.00379	0.95469	1.01036		0.753	0.993075	1.01415	0.984232	1.0136	0.990681
0.754	1.04458	0.959144	1.03107	0.981322	1.00997		0.754	0.988841	1.03504	0.974502	1.03367	1.03464
0.755	1.03088	0.949377	1.01166	0.991731	1.01683		0.755	0.986501	1.03222	0.967336	1.00414	1.00231
0.756	1.0169	0.96761	1.00478	0.993821	1.02273		0.756	1.00347	1.00877	0.993094	0.998528	0.990698
0.757	1.02761	0.962645	1.04278	0.972993	1.01687		0.757	0.999146	1.01743	0.984597	1.02454	0.99503
0.758	1.02971	0.947946	1.01636	0.991133	1.00278		0.758	0.997413	1.01061	0.983972	0.994053	0.992192
0.759	1.05522	0.959415	1.0045	0.987207	1.03544		0.759	0.979226	1.01888	0.993589	1.02012	1.01352
0.76	1.01404	0.968499	1.02762	0.959915	1.03496		0.76	0.986125	1.01379	0.979379	1.01793	0.992889
0.761	1.02765	0.952184	1.02938	0.979821	1.01965		0.761	0.972618	1.02711	0.984337	0.985071	0.989363
0.762	1.01967	0.979621	1.03427	0.986709	1.01567		0.762	0.994937	1.01138	0.97821	1.01147	1.01696
0.763	1.01546	0.956249	1.03135	0.980145	1.0046		0.763	1.0009	1.00766	0.988436	1.01286	0.992293
0.764	1.00727	0.967491	1.02021	0.966297	1.00567		0.764	1.01323	1.01593	0.984435	0.993016	0.988607
0.765	1.01314	0.96594	1.02998	0.983747	0.99687		0.765	1.00028	1.01955	0.987738	1.01792	1.00259
0.766	1.01521	0.986244	1.04096	0.965637	1.00238		0.766	0.991573	1.01731	0.999002	0.987897	1.00354
0.767	1.03749	0.952358	1.01448	0.978948	1.02198		0.767	0.980644	1.02878	0.988257	1.00453	1.00538
0.768	1.03388	0.94271	0.983801	0.987612	1.01839		0.768	0.988089	1.0066	0.987892	1.01685	0.990412
0.769	1.01514	0.952694	1.01537	0.963923	1.02185		0.769	0.987107	1.00833	0.988582	1.00181	0.979985
0.77	0.997907	0.967274	1.01522	0.957125	1.02714		0.77	0.983709	1.00336	0.997825	1.00272	0.974015
0.771	1.05198	0.964293	1.01126	0.985198	1.01911		0.771	1.00165	1.02868	0.980815	1.01655	1.00322
0.772	1.03268	0.950309	1.02664	0.991904	1.01098		0.772	1.00306	1.02808	0.990586	1.00915	0.998892
0.773	1.02522	0.962385	1.0306	0.98119	1.02678		0.773	1.01426	1.00524	0.983623	1.01284	1.01922
0.774	1.01135	0.966233	1.02426	0.964724	1.0201		0.774	0.993716	1.02336	1.015	1.01595	1.00951
0.775	1.01791	0.954602	1.02639	0.979993	0.999002		0.775	0.981728	1.0203	0.988963	1.02052	1.00099
0.776	1.02887	0.952889	1.00697	1.00905	1.01664		0.776	0.988832	1.01814	0.997971	0.991862	0.999043
0.777	1.01766	0.965995	1.03324	0.98813	1.03036		0.777	0.997276	1.01841	0.980905	1.01243	0.977961
0.778	1.02178	0.96594	1.04125	0.984721	1.02211		0.778	0.974872	1.02613	0.989474	1.01018	0.99456
0.779	1.02256	0.936802	1.05898	1.00138	1.03185		0.779	0.981626	1.0405	0.980685	1.0077	0.997893
0.78	1.03454	0.95252	1.00572	0.963821	1.0035		0.78	0.989728	1.01295	0.984987	1.0105	0.985224
0.781	1.052	0.951881	1.01545	0.980419	1.01046		0.781	0.985212	1.01571	0.984597	0.999172	0.999866
0.782	1.02019	0.952759	1.00971	0.982347	0.993074		0.782	0.999898	1.0249	1.00049	1.03302	1.00206
0.783	1.03405	0.947393	1.00585	0.981819	1.03363		0.783	1.0036	1.02546	0.986561	1.0022	1.0012
0.784	1.02816	0.964672	1.00526	0.980318	1.02374		0.784	1.00972	1.03024	0.987007	1.00821	0.982772
0.785	1.04182	0.970417	1.02	0.972262	1.01831		0.785	0.996798	1.03459	0.983607	0.996989	0.984518
0.786	1.01168	0.975447	1.02741	0.970233	1.02134		0.786	0.985272	1.0252	0.969811	1.01561	1.00164
0.787	1.0253	0.969973	1.01481	0.959012	1.03297		0.787	0.977075	1.01248	0.96921	1.00549	0.989766
0.788	1.01612	0.956217	1.02947	0.964328	0.996932		0.788	0.996038	1.01775	0.982804	1.021	0.988767
0.789	1.02732	0.943631	1.03222	0.99027	1.00916		0.789	0.983393	1.01833	0.995926	1.00844	0.99885
0.79	1.04031	0.976065	1.00662	0.988323	1.00541		0.79	1.00872	1.02441	0.987835	0.998093	1.00114
0.791	1.01745	0.970385	1.02531	0.978289	1.01105		0.791	1.0058	1.0155	0.991722	1.00432	0.995198
0.792	1.01068	0.955111	1.02764	0.97423	1.02682		0.792	1.00041	1.01052	1.0086	1.01491	1.00259
0.793	1.01452	0.958244	1.0094	0.975073	1.03659		0.793	0.99772	1.03559	0.996583	1.01948	1.01265
0.794	1.02591	0.951263	1.0102	0.956658	1.01627		0.794	0.993272	1.0117	0.988363	1.0135	1.00501
0.795	1.00192	0.960477	1.02219	0.985279	1.02579		0.795	0.986492	1.03119	0.993021	1.00834	1.01327
0.796	1.03618	0.949864	1.00001	0.969269	0.978807		0.796	0.996644	1.01277	0.996429	1.00105	0.965729
0.797	1.00254	0.955154	1.02103	0.953919	0.99949		0.797	0.987269	1.02067	0.995707	0.996621	0.99351
0.798	1.03421	0.979035	1.02456	0.992158	1.01303		0.798	0.992768	0.996317	0.988216	1.01209	0.976484
0.799	1.04327	0.949442	1.0332	0.95052	1.01121		0.799	0.986091	1.01573	1.01407	1.01786	1.007
0.8	1.03201	0.961453	1.03774	0.961752	1.03981		0.8	0.986945	1.03695	0.980012	1.01169	1.01754
0.801	1.0088	0.967913	1.02049	0.968224	1.02601		0.801	0.993212	1.01472	0.985149	1.00587	0.996684
0.802	1.0243	0.969268	1.02547	0.980034	1.02206		0.802	0.993818	1.02869	0.993824	1.00194	1.00097
0.803	1.01003	0.933149	1.01923	0.963131	1.02303		0.803	0.981609	1.02848	0.973382	1.01376	1.01298
0.804	1.01411	0.942493	1.03257	0.987318	1.01021		0.804	0.995295	1.01285	0.998612	1.00366	0.98739
0.805	1.02995	0.966396	1.01294	0.974555	1.02342		0.805	1.00282	1.0124	0.995691	1.02841	0.992419
0.806	1.02019	0.954883	1.0102	0.990392	1.0066		0.806	0.98709	1.00532	0.982114	1.00228	0.969339
0.807	1.0181	0.973127	1.0508	0.977467	0.998471		0.807	0.98154	1.03676	0.988533	1.01484	1.00887
0.808	1.05102	0.956369	1.01899	0.984619	1.00222		0.808	0.987679	1.02322	0.98071	1.00099	0.985408
0.809	1.00978	0.960553	1.02886	0.962746	1.00192		0.809	0.995808	1.01156	0.984759	0.998578	0.955343
0.81	1.01745	0.952596	1.00372	0.949922	1.00953		0.81	0.987987	1.02831	0.966808	1.00923	0.992687
0.811	1.0232	0.960683	1.02064	0.976889	1.01118		0.811	1.00285	1.01311	0.971661	0.996889	0.9966
0.812	1.03519	0.945377	1.02336	0.97909	1.01015		0.812	0.979303	1.03314	0.987949	1.00052	0.988918
0.813	1.00103	0.942569	1.01849	0.96023	1.03297		0.813	0.985997	1.0439	0.988712	1.01486	0.991957
0.814	1.03484	0.961171	1.01385	0.981058	1.01196		0.814	0.9764	1.02953	0.997087	1.0175	0.998312
0.815	1.02691	0.945691	1.02024	0.988891	0.992346		0.815	0.993391	1.02517	0.998807	0.993292	0.99995
0.816	1.01533	0.940152	1.01911	0.962167	1.03503		0.816	1.00962	1.02131	0.972156	1.0135	0.994467
0.817	1.00817	0.974472	1.01393	0.966845	1.02029		0.817	0.990463	1.02036	0.982609	1.02469	0.99309
0.818	1.00902	0.956228	1.00811	0.978644	1.01269		0.818	1.00413	1.00957	0.99815	1.01879	0.999589
0.819	1.01592	0.94374	1.01694	0.959266	1.03228		0.819	0.976144	1.0136	0.986261	1.00815	0.987818
0.82	1.02687	0.951328	1.00191	0.976949	1.03712		0.82	0.99112	1.01771	0.985287	0.995099	0.991823
0.821	1.0304	0.984444	1.01888	0.982103	1.02239		0.821	0.991633	1.01335	0.984305	0.991929	1.00767
0.822	0.995522	0.95058	1.0099	0.995942	1.01752		0.822	0.991761	1.03325	0.981197	1.00336	1.01473
0.823	1.03409	0.946656	1.02829	0.991407	1.00552		0.823	0.994245	1.02857	0.994603	1.01107	1.0084
0.824	1.02159	0.967924	1.0083	0.973348	1.03265		0.824	1.01574	1.005	0.984013	1.02405	1.00243
0.825	0.992714	0.946168	1.02111	0.983148	1.02366		0.825	0.985041	1.01035	0.987291	1.00501	0.978986
0.826	1.01713	0.961301	1.0198	0.988323	1.03907		0.826	0.984179	1.01497	0.988793	1.01968	0.975988
0.827	1.0233	0.964553	1.02581	0.98046	1.02275		0.827	0.985126	1.0076	0.986366	0.999565	0.994459
0.828	1.03834	0.965117	1.03023	0.988576	1.00178		0.828	0.979824	1.02788	0.970744	0.988884	0.985064
0.829	1.03852	0.971816	1.05495	0.980582	1.03167		0.829	0.98972	1.02043	0.967693	1.01472	0.988767
0.83	0.999616	0.955165	1.02811	0.978837	1.02866		0.83	1.00243	1.01514	0.981148	1.00992	0.995315
0.831	1.012	0.94529	1.01035	0.992574	1.01143		0.831	1.00157	1.01264	1.00377	1.02406	0.971883
0.832	1.04628	0.961691	1.01079	0.97072	0.993137		0.832	0.975675	1.00317	0.984646	1.00677	0.981983
0.833	1.02407	0.94439	1.03957	0.979587	1.02779		0.833	0.997772	0.998837	0.987178	1.00601	1.00489
0.834	1.01794	0.963404	1.0279	0.978583	1.02358		0.834	0.991658	1.01399	0.978381	1.01169	0.99592
0.835	1.00682	0.956217	1.00307	0.958769	1.01995		0.835	0.997063	1.01578	0.976392	1.00232	0.987499
0.836	1.03646	0.947415	1.0155	0.983158	1.0292		0.836	1.00232	1.01723	0.988598	1.01236	1.0031
0.837	1.03055	0.946341	1.017	0.970426	1.02032		0.837	1.0045	1.01667	0.988208	1.01381	1.00319
0.838	1.02398	0.962417	1.01838	0.985746	1.00863		0.838	1.00467	1.01998	0.98833	1.00187	0.995844
0.839	1.01375	0.954764	1.01744	0.973338	1.01931		0.839	0.989336	1.01926	0.979703	0.98937	0.985207
0.84	1.02626	0.991957	0.997525	0.986344	1.0218		0.84	1.00683	1.01849	0.994741	1.00832	0.995903
0.841	1.0431	0.977864	1.02178	0.982732	1.01448		0.841	0.976042	1.01953	0.979111	1.01859	0.998069
0.842	1.04381	0.969951	1.00488	0.963902	1.01354		0.842	1.00883	1.02491	0.970079	1.00827	0.99995
0.843	1.03095	0.962081	1.0025	0.982215	1.01		0.843	0.998736	1.01667	0.995488	1.00696	1.00314
0.844	1.01443	0.966558	1.00277	0.986679	1.00842		0.844	0.988781	1.0244	0.977553	1.01449	0.987961
0.845	1.03023	0.971772	1.02541	0.969239	1.00276		0.845	1.00123	1.01331	0.987421	0.999573	1.00051
0.846	1.02004	0.958417	1.02116	0.970913	0.979639		0.846	0.997498	1.00799	0.992558	1.01889	0.99759
0.847	1.03228	0.941561	1.0385	0.97978	1.00973		0.847	0.996662	1.01488	0.981205	1.00152	1.01364
0.848	1.00948	0.943621	1.02996	0.970994	1.01177		0.848	0.981779	1.02252	0.974299	1.0052	1.00004
0.849	1.04129	0.979751	1.00065	0.995881	1.01347		0.849	0.992298	1.01337	0.976766	1.02319	0.9831
0.85	1.03282	0.95807	1.00196	0.952052	1.01588		0.85	0.98376	1.02246	0.992607	1.01502	1.00616
0.851	1.04197	0.956499	1.02204	0.968397	1.03578		0.851	0.970577	1.02588	0.999262	1.01971	1.00621
0.852	1.02587	0.953854	0.999229	0.971826	1.01012		0.852	0.975922	1.01448	0.98536	1.01071	1.0052
0.853	1.00421	0.947686	1.01704	0.990605	1.00594		0.853	0.984307	1.01046	1.01141	1.00704	0.983225
0.854	1.03121	0.961648	1.02197	0.985533	1.02594		0.854	0.987517	1.02452	0.983055	1.01734	0.985392
0.855	1.03428	0.969854	0.997709	0.963152	1.00052		0.855	0.972191	1.01965	1.00624	0.996194	1.01206
0.856	1.03332	0.967523	1.00733	0.987744	1.00472		0.856	0.998292	1.02747	0.994417	1.01308	1.00506
0.857	1.01153	0.956705	1.01279	0.980774	0.993615		0.857	0.995663	1.00678	0.988987	1.01359	1.0054
0.858	1.04135	0.963512	1.04313	0.965231	1.02587		0.858	0.97804	1.01503	0.992063	1.0206	0.991143
0.859	1.01881	0.966612	1.05436	0.968001	1.03365		0.859	0.984896	1.02969	0.971929	1.0178	1.02098
0.86	1.02403	0.965041	1.047	0.971319	1.02759		0.86	0.97938	1.0241	0.993987	1.00697	0.995189
0.861	0.988819	0.961745	1.0243	0.959337	1.00656		0.861	0.992657	1.01645	0.969113	1.01556	0.996583
0.862	1.0352	0.975534	1.01738	0.954721	1.02252		0.862	0.988969	1.0211	0.98807	1.00734	1.00766
0.863	1.04095	0.965333	1.02706	0.970487	1.00945		0.863	1.00591	1.02432	0.984248	1.0007	1.00334
0.864	1.0367	0.957377	1.02083	0.959377	0.999958		0.864	0.973036	1.00951	0.984354	1.01347	0.996642
0.865	1.03064	0.956943	1.02516	0.963608	1.03041		0.865	0.999607	1.01519	1.00228	1.01293	0.999908
0.866	1.00772	0.973518	1.01778	0.971461	1.00631		0.866	1.00567	1.0119	0.980182	1.00867	0.997742
0.867	1.00485	0.952304	1.02096	0.951007	1.00862		0.867	0.996115	1.01354	0.995731	1.00338	0.996281
0.868	1.02	0.958114	1.01264	0.967788	1.00963		0.868	0.992649	1.01768	0.964398	1.01576	0.990177
0.869	1.04774	0.965897	1.04498	0.974383	1.02142		0.869	0.982847	1.00044	0.980677	1.00225	0.997431
0.87	1.01794	0.970732	1.03557	0.99512	0.99713		0.87	0.969271	1.0118	0.984516	1.00039	0.993846
0.871	1.01077	0.950352	1.03828	0.992918	1.02739		0.871	0.992905	0.99983	0.965607	1.0144	0.983016
0.872	1.00864	0.961192	1.04269	0.973713	1.01161		0.872	0.978706	1.01042	0.987567	0.997524	0.980514
0.873	1.05161	0.957084	1.0138	1.00006	1.00035		0.873	0.969194	1.01685	0.977902	1.00681	0.986055
0.874	1.0248	0.96865	1.02847	0.982256	1.01959		0.874	0.993161	1.0187	0.981189	1.01201	1.00014
0.875	1.04885	0.938873	1.02885	0.986009	1.00795		0.875	0.992589	1.00736	0.976977	1.01275	0.993796
0.876	1.01946	0.967957	1.03513	0.990372	0.996152		0.876	1.00063	0.992691	1.01304	1.00232	0.998875
0.877	1.02293	0.968943	1.01597	0.983798	1.02184		0.877	0.991778	1.0295	0.97718	1.00396	1.00531
0.878	1.01008	0.96323	1.02171	0.964724	1.0254		0.878	0.979611	1.02965	0.986715	0.99586	0.995198
0.879	1.01057	0.97897	1.02561	0.972922	1.0099		0.879	1.00533	1.00768	0.989434	0.998821	0.998934
0.88	1.03423	0.963295	1.02908	0.989905	1.01008		0.88	1.01062	1.03401	0.973658	1.006	0.988137
0.881	1.01264	0.96181	1.01454	0.966621	1.01155		0.881	1.0056	1.00716	1.0017	1.00894	1.00605
0.882	1.02308	0.9649	1.01577	0.95327	0.993709		0.882	0.984008	1.01186	0.984183	1.00402	0.974746
0.883	1.03772	0.948184	1.02288	0.981657	1.01719		0.883	0.998216	1.01214	0.986188	1.01073	0.983175
0.884	1.01579	0.977702	1.03971	0.978613	1.006		0.884	1.00571	1.01043	0.977626	0.990181	0.989573
0.885	1.04853	0.954385	1.0086	0.975417	1.01524		0.885	0.989037	1.01131	0.99195	1.01963	1.01389
0.886	1.01807	0.963556	1.02745	0.979902	1.04187		0.886	0.994928	1.00747	0.974859	1.01444	1.00995
0.887	1.01933	0.964694	1.02373	0.979871	1.01774		0.887	0.986808	1.00799	0.97804	1.01751	0.995936
0.888	1.05824	0.955794	1.01264	0.966804	1.01504		0.888	0.986262	1.00909	0.98652	0.991695	0.999824
0.889	1.02923	0.952249	0.995257	0.997149	1.01112		0.889	0.993759	1.02119	0.979874	1.00662	1.00516
0.89	1.01472	0.941398	1.00755	0.975306	1.01293		0.89	0.976042	1.01995	0.977472	0.991795	0.98922
0.891	1.00846	0.970829	1.02608	0.969137	1.01835		0.891	0.986501	1.01171	0.970468	1.01136	0.999186
0.892	1.04724	0.94542	1.0322	0.950612	0.993553		0.892	0.981199	1.02504	0.970801	1.01745	1.00601
0.893	1.03309	0.946201	1.00884	0.964856	1.02554		0.893	1.00091	1.02478	1.002	1.01714	1.00128
0.894	1.00672	0.929702	1.00624	0.978948	1.02618		0.894	0.98026	1.01097	0.985092	1.01404	1.0092
0.895	1.02188	0.969247	1.02123	0.969564	1.01768		0.895	0.96834	1.0136	0.990513	0.991285	0.98608
0.896	1.00249	0.965344	1.0111	0.977984	1.0287		0.896	1.00472	1.02935	0.968869	0.998277	0.972689
0.897	1.01354	0.964423	1.02765	0.978837	1.0152		0.897	0.995663	1.00797	0.974566	1.01607	1.00097
0.898	1.00246	0.95858	1.03245	0.991143	1.00524		0.898	0.990881	1.00526	0.990245	0.998352	1.00364
0.899	1.00938	0.946764	1.01704	0.9791	1.00129		0.899	0.9993	1.01547	0.981099	0.998185	0.997406
0.9	1.0036	0.965214	1.04328	0.959398	0.997005		0.9	0.978851	1.02626	0.983006	1.02338	0.985694
0.901	0.991058	0.951501	0.99376	0.979587	1.01588		0.901	0.986441	1.02896	0.982982	1.00042	0.996927
0.902	1.00571	0.964596	1.011	0.962421	1.01152		0.902	0.979944	1.02332	0.986959	1.01877	0.985685
0.903	1.02744	0.960802	1.00839	0.961589	1.01562		0.903	0.992384	1.01399	0.960129	1.02032	0.989228
0.904	1.01888	0.958287	1.00199	0.964714	1.00129		0.904	0.978808	1.01967	0.992623	1.00575	0.967106
0.905	1.06631	0.955436	1.02473	0.986405	1.02045		0.905	1.00043	1.02267	1.00006	1.01679	0.992352
0.906	1.03145	0.953767	1.02048	0.979263	1.03171		0.906	1.01195	1.01922	0.975954	1.01374	0.995214
0.907	1.0368	0.957973	0.996661	0.988069	1.02478		0.907	0.988192	1.0251	0.981408	1.00366	0.989044
0.908	1.0726	0.949962	1.03711	0.977639	1.00868		0.908	0.974086	1.01927	0.98183	1.00415	0.98974
0.909	1.02888	0.962428	1.03546	0.976777	1.00488		0.909	0.988977	1.02353	0.972895	1.01202	0.986819
0.91	1.02471	0.976596	1.00404	0.954711	1.02708		0.91	0.988644	1.01815	0.976847	0.994145	0.994442
0.911	1.00976	0.94864	1.0232	0.973277	1.02468		0.911	0.988841	1.01234	0.980742	1.00548	1.0085
0.912	1.02446	0.968878	1.02849	0.962381	1.04011		0.912	0.997695	1.00624	0.984881	1.01564	0.979766
0.913	1.02378	0.93277	1.01582	0.9721	1.01148		0.913	0.991846	1.01687	0.999375	0.996738	0.980228
0.914	1.04535	0.942764	1.03853	0.973256	1.00288		0.914	1.00307	1.01069	0.982771	1.0153	0.995962
0.915	1.02981	0.947198	1.02798	0.961711	1.00784		0.915	0.986125	1.02645	0.998969	0.999297	0.996222
0.916	1.02548	0.962558	1.00673	0.968336	1.02371		0.916	0.979141	1.00995	0.980637	1.00482	1.00873
0.917	1.02505	0.97522	1.00941	0.967382	1.01534		0.917	1.00467	1.02261	0.993143	1.01569	0.987423
0.918	1.02109	0.964705	1.02216	0.97702	1.00108		0.918	1.00027	1.00553	0.990822	1.0158	1.01702
0.919	1.01815	0.951165	1.02977	0.984072	1.00005		0.919	0.986988	0.999733	0.978519	1.00418	0.996239
0.92	1.02252	0.969149	0.995429	0.97626	1.00102		0.92	0.990403	1.02602	0.997517	0.997165	1.00709
0.921	0.972524	0.964542	1.03297	0.966997	1.00163		0.921	0.992939	1.00904	0.976977	1.01188	0.983267
0.922	1.01445	0.961669	1.02977	0.990494	1.01475		0.922	0.969271	1.02901	0.989961	0.995701	0.992419
0.923	1.00628	0.944846	1.03107	0.946645	1.01949		0.923	0.989933	1.00321	0.990059	1.00183	0.986659
0.924	1.04052	0.954883	1.025	0.982895	0.998919		0.924	0.99054	1.01768	0.999692	1.0238	0.994719
0.925	1.0257	0.983404	1.01333	0.939117	1.0121		0.925	1.00025	1.00055	0.988281	1.00463	0.976257
0.926	1.0166	0.958688	1.02379	0.977457	1.04245		0.926	0.992418	1.02632	0.970704	1.00862	0.990085
0.927	1.03564	0.971978	1.03198	0.982996	1.00246		0.927	0.997524	0.999491	0.975776	1.01598	0.968172
0.928	1.01849	0.955415	1.00679	0.971633	1.02508		0.928	0.983427	1.00636	0.974761	0.995099	1.00348
0.929	1.015	0.964087	1.00715	0.969381	1.00984		0.929	0.997712	1.03732	0.985319	1.0204	0.995147
0.93	1.04266	0.937225	1.01613	0.965089	1.00394		0.93	1.00943	1.03654	0.976401	1.00448	0.97839
0.931	1.03399	0.965366	1.01126	0.961254	1.02077		0.931	1.00503	1.01975	0.983826	1.00458	1.00388
0.932	1.03625	0.951989	1.01019	0.991143	1.02728		0.932	1.0035	1.00266	0.997971	1.00402	0.998119
0.933	0.998026	0.95419	1.0392	0.978968	1.00039		0.933	0.993041	1.01774	1.00997	1.02091	1.00501
0.934	1.02174	0.957854	1.02239	0.945204	1.01422		0.934	0.975922	1.01261	0.999675	0.999875	0.999127
0.935	1.04029	0.946851	1.01375	0.974535	1.01578		0.935	0.975999	1.02303	0.991065	1.01925	0.997145
0.936	1.00968	0.958786	1.0182	0.978705	1.00767		0.936	0.985707	1.01921	0.980547	1.01777	0.99859
0.937	0.984725	0.974309	1.01612	0.977132	1.01887		0.937	0.998301	1.01532	0.991244	1.01826	0.995164
0.938	1.05071	0.959794	1.01425	0.970842	1.03922		0.938	0.983154	1.01304	1.00308	1.02729	1.00802
0.939	1.03219	0.945691	1.0151	0.9519	1.01481		0.939	0.985664	1.02753	0.997574	1.00278	1.00856
0.94	1.04061	0.955696	1.00018	0.978613	1.01537		0.94	1.00309	1.02617	0.974331	1.03008	1.00191
0.941	1.0303	0.939957	1.03569	0.962868	1.00726		0.941	0.989173	1.02565	0.993045	1.0128	1.00193
0.942	1.01974	0.971729	1.01352	0.948948	1.02558		0.942	0.988286	1.01085	0.987324	1.0032	0.974208
0.943	1.04163	0.974808	1.01789	0.969726	1.00867		0.943	1.00725	1.01334	0.983031	0.996529	1.01577
0.944	1.01798	0.960618	0.998285	0.971177	1.01936		0.944	1.00837	0.99874	0.986634	1.02014	0.986987
0.945	1.03384	0.953864	1.01119	0.971207	1.02643		0.945	0.98604	1.00892	0.98678	1.0173	0.997616
0.946	1.04508	0.952228	1.0028	0.994542	1.00067		0.946	0.983171	1.01241	0.984126	1.00324	1.0053
0.947	1.0316	0.948856	0.997479	0.967332	1.00678		0.947	0.984529	1.01872	0.981813	1.00959	0.986441
0.948	1.02049	0.962179	1.01264	0.952895	1.02181		0.948	0.989327	1.01459	0.986739	1.01696	0.99419
0.949	1.00185	0.951729	1.00486	0.985847	1.0121		0.949	0.992999	1.01368	0.98282	1.03231	1.00145
0.95	1.02662	0.944033	0.995648	0.979973	1.02894		0.95	1.00429	1.01857	0.984199	1.01291	1.00049
0.951	1.02658	0.946883	1.00462	0.968052	1.01773		0.951	0.984162	1.0033	0.976693	1.02608	0.993334
0.952	1.02566	0.989203	1.011	0.977994	1.01619		0.952	0.997908	1.02457	0.993954	1.00625	1.00779
0.953	1.01308	0.950114	1.00958	0.964075	0.996371		0.953	0.985015	1.0333	0.99707	0.993794	1.00977
0.954	1.04973	0.968022	1.02887	0.95325	1.00191		0.954	0.991146	1.02129	0.995244	0.989068	0.995592
0.955	1.04661	0.966417	1.02174	0.98464	1.00817		0.955	0.993579	1.01611	0.972878	1.00938	0.997926
0.956	1.03731	0.960889	1.00405	0.979963	0.99817		0.956	1.01845	1.02677	0.978981	1.01798	0.994862
0.957	1.04113	0.978287	1.00447	0.975458	1.02124		0.957	0.988448	1.01422	0.992834	1.00562	0.996012
0.958	1.00701	0.960293	1.02011	0.971136	0.987896		0.958	0.991419	1.0211	0.994725	1.01414	0.999547
0.959	1.04316	0.948011	0.994336	0.98954	1.02094		0.959	1.00492	1.01954	0.981456	1.00061	0.983041
0.96	1.01309	0.941192	1.00572	0.943094	1.02961		0.96	0.989822	1.02725	0.975832	1.00805	0.972932
0.961	1.00404	0.966753	1.0087	0.973409	1.01232		0.961	0.997404	1.02909	0.987348	1.02627	0.98692
0.962	1.0256	0.953528	1.02685	0.980592	1.01082		0.962	0.993818	1.00993	0.977983	1.01147	1.01619
0.963	1.02014	0.959317	1.01003	0.984579	1.00715		0.963	0.99568	1.01581	0.990213	1.01198	0.986726
0.964	1.00953	0.941496	1.03167	0.976929	1.00806		0.964	0.985186	1.02137	0.982122	1.01061	0.994484
0.965	1.03479	0.963176	0.990663	0.988759	1.00434		0.965	1.00558	1.00615	1.01104	1.01176	0.999412
0.966	0.986832	0.976379	1.02623	0.992087	1.024		0.966	0.983009	1.01081	0.984427	1.00264	0.978121
0.967	1.01974	0.976705	1.03745	0.96865	1.01617		0.967	1.01707	1.01189	0.976936	1.01681	0.999001
0.968	1.04977	0.975718	1.01507	0.957947	1.02608		0.968	0.987363	1.01506	0.99341	1.00515	1.0043
0.969	1.02479	0.938667	0.993887	0.980774	1.00973		0.969	1.00363	1.00652	0.979119	1.0045	0.99911
0.97	1.02132	0.948336	1.01999	0.973642	1.01747		0.97	0.992042	1.0124	0.960697	1.00958	0.990395
0.971	1.02287	0.936509	1.02067	0.973967	1.01853		0.971	0.97786	1.01848	0.98747	1.01007	0.993829
0.972	1.04838	0.958482	1.01651	0.996753	1.03259		0.972	1.00277	1.01433	0.980426	1.0033	0.988691
0.973	1.03413	0.956986	1.0355	0.974271	1.02648		0.973	0.990856	1.02902	0.965786	1.01433	0.981697
0.974	1.01025	0.933789	1.03133	0.968194	1.03945		0.974	0.986646	1.01906	0.979192	1.00539	0.98723
0.975	1.00933	0.986894	1.00752	0.97835	1.01763		0.975	0.986723	1.02873	0.986074	1.00103	1.00135
0.976	1.04904	0.961474	1.0173	0.968062	1.02056		0.976	0.986843	1.0208	0.981253	0.986509	0.987768
0.977	1.00856	0.971176	1.00242	0.964146	1.00369		0.977	0.973267	1.01558	0.976441	1.00762	0.988716
0.978	1.01963	0.967046	1.04314	0.996662	1.04516		0.978	0.99422	1.02116	0.995691	1.00871	0.994333
0.979	1.011	0.985041	1.03705	0.997555	1.01344		0.979	0.992085	1.0128	0.987145	1.02183	0.985601
0.98	1.00313	0.97303	1.01207	0.979496	1.01761		0.98	0.970867	1.01879	0.980629	0.992464	1.006
0.981	1.0184	0.948921	1.01812	0.980358	1.02718		0.981	0.983914	0.998215	0.976392	1.01767	1.00868
0.982	1.0268	0.989051	1.02249	0.989165	0.993449		0.982	1.00828	1.0247	0.976896	0.98732	0.980405
0.983	1.05008	0.943686	1.02748	0.965353	1.03878		0.983	1.01091	1.01594	0.992242	1.02069	0.989589
0.984	1.0489	0.95419	0.996661	0.979029	1.01788		0.984	0.979431	1.02776	0.978283	0.989319	0.991143
0.985	1.03557	0.938591	1.02266	0.948958	1.01771		0.985	1.00129	1.01453	0.976879	0.991385	0.996818
0.986	1.01456	0.939924	1.03198	0.971826	1.01956		0.986	0.986885	1.01736	0.982657	1.01454	0.974771
0.987	1.03892	0.966645	0.991204	0.988891	1.02116		0.987	0.980217	1.02631	0.976401	1.01136	0.991713
0.988	1.00095	0.957062	1.01158	0.972658	1.03387		0.988	0.992059	1.00132	0.990586	1.00826	0.994576
0.989	1.05364	0.962818	1.03557	0.966175	1.01555		0.989	0.992025	1.02044	0.966581	1.0067	0.987709
0.99	1.02687	0.953669	1.03249	0.976878	1.02408		0.99	0.989336	1.01403	0.983088	1.01311	0.990555
0.991	1.03961	0.960325	1.02408	0.978512	1.02554		0.991	0.989959	1.02423	0.981919	0.999983	0.981496
0.992	1.02145	0.945821	1.03304	0.960869	1.03479		0.992	0.99007	1.01889	0.979322	1.00366	1.00353
0.993	1.00636	0.971805	1.01262	0.948552	1.02209		0.993	0.981617	1.0264	0.986001	1.03008	1.00358
0.994	1.0425	0.959881	1.03023	0.970274	0.999137		0.994	0.98277	1.0108	0.967417	1.00493	0.993938
0.995	1.02028	0.964369	1.00444	0.965546	0.985338		0.995	0.992316	1.02719	0.990083	0.999314	0.995307
0.996	1.01111	0.967512	1.01333	0.959641	1.01363		0.996	0.99749	1.00989	0.974258	1.01095	0.989287
0.997	1.01623	0.943967	1.02551	0.98538	0.994572		0.997	1.00189	1.01853	0.992014	1.02348	0.985434
0.998	1.00118	0.942775	1.04652	0.980967	1.01283		0.998	0.999479	1.00205	0.96736	1.00956	0.984308
0.999	1.02553	0.972119	1.00891	0.99022	1.01334		0.999	0.996884	1.01371	0.984443	0.993359	0.99555
1	1.0237	0.959274	1.02204	0.987551	1.01514		1	1.00184	0.998029	1.00009	1.02625	0.983931
1.5	1.02047	0.958016	1.0151	0.972922	1.0141		1.5	0.990207	1.01463	0.982657	1.00256	0.991462
2	1.0181	0.957117	1.01451	0.972262	1.00771		2	0.988251	1.0113	0.975995	0.996479	0.982965
2.5	1.01742	0.953518	1.0138	0.969056	1.00561		2.5	0.985929	1.00755	0.971978	0.990373	0.974091
3	1.0155	0.951642	1.01045	0.965759	1.00267		3	0.982847	1.00334	0.965672	0.98323	0.966594
3.5	1.01274	0.950959	1.01021	0.963507	0.999303		3.5	0.97944	0.999992	0.961517	0.975854	0.95918
4	1.01222	0.947144	1.00839	0.961823	0.996735		4	0.978689	0.995905	0.956477	0.969079	0.951977
4.5	1.00935	0.945799	1.00622	0.959864	0.993376		4.5	0.976486	0.991924	0.951219	0.962856	0.943396
5	1.00609	0.944022	1.00477	0.958221	0.990277		5	0.973164	0.987579	0.945668	0.956608	0.935471
5.5	1.00396	0.940965	1.00175	0.954924	0.986294		5.5	0.971474	0.985092	0.940425	0.95154	0.92815
6	1.00326	0.94077	1.00043	0.953138	0.98253		6	0.968818	0.980278	0.936091	0.944205	0.92213
6.5	1.00154	0.939317	0.99703	0.950622	0.981001		6.5	0.967597	0.976531	0.930541	0.936359	0.913441
7	0.99947	0.935772	0.995165	0.948765	0.97758		7	0.963969	0.972905	0.92473	0.931174	0.905221
7.5	0.999603	0.934938	0.993368	0.945722	0.974398		7.5	0.962167	0.969408	0.920697	0.925152	0.898983
8	0.995416	0.933431	0.990421	0.943926	0.97158		8	0.959793	0.965225	0.915608	0.917733	0.892418
8.5	0.994529	0.929713	0.990283	0.941704	0.966713		8.5	0.957454	0.961421	0.909643	0.911377	0.883006
9	0.991985	0.929214	0.986679	0.939056	0.964603		9	0.954696	0.958005	0.906722	0.906099	0.877188
9.5	0.992488	0.926526	0.985885	0.936621	0.961233		9.5	0.953193	0.954362	0.901772	0.900211	0.870346
10	0.989216	0.925268	0.982742	0.934825	0.958748		10	0.951084	0.950284	0.895709	0.894281	0.863436
10.5	0.987454	0.924325	0.980474	0.932208	0.956949		10.5	0.949283	0.947425	0.890272	0.889681	0.857181
11	0.985692	0.922244	0.979679	0.931548	0.952405		11	0.94597	0.942692	0.887188	0.883441	0.848895
11.5	0.983321	0.920347	0.976041	0.928221	0.948495		11.5	0.944203	0.940262	0.882433	0.877193	0.842321
12	0.982672	0.918016	0.974015	0.925664	0.946217		12	0.942427	0.937168	0.877994	0.870987	0.836301
12.5	0.981148	0.916661	0.972564	0.923615	0.942391		12.5	0.940813	0.933389	0.872767	0.865601	0.830156
13	0.979612	0.9151	0.971056	0.920804	0.941028		13	0.937227	0.929965	0.867687	0.858525	0.822793
13.5	0.976763	0.911946	0.968857	0.920094	0.938065		13.5	0.936091	0.926137	0.86354	0.854159	0.817411
14	0.976869	0.911176	0.967096	0.918146	0.934363		14	0.932744	0.92251	0.860253	0.848639	0.810854
14.5	0.974021	0.910005	0.965495	0.91633	0.93142		14.5	0.931796	0.919078	0.854654	0.842584	0.804154
15	0.973769	0.908813	0.963089	0.915224	0.927104		15	0.929559	0.914281	0.850077	0.837892	0.798034
15.5	0.972007	0.905648	0.96104	0.912028	0.924827		15.5	0.928663	0.911099	0.846092	0.831527	0.790335
16	0.970418	0.905041	0.958311	0.909188	0.922477		16	0.925282	0.90891	0.841856	0.82522	0.785037
16.5	0.967543	0.902157	0.956377	0.908072	0.919326		16.5	0.923198	0.904129	0.837928	0.821348	0.779429
17	0.966602	0.903035	0.957563	0.905028	0.916134		17	0.921431	0.900923	0.832807	0.816363	0.774475
17.5	0.963873	0.900607	0.951991	0.9031	0.914574		17.5	0.919809	0.89779	0.828928	0.810617	0.767348
18	0.962032	0.898114	0.950816	0.900574	0.911111		18	0.917435	0.895851	0.824838	0.805314	0.76252
18.5	0.961714	0.898211	0.949665	0.898616	0.907378		18.5	0.915036	0.892153	0.819555	0.799343	0.754779
19	0.959435	0.896163	0.947823	0.895948	0.90429		19	0.912705	0.888704	0.815822	0.794391	0.750355
19.5	0.95819	0.894612	0.946338	0.894943	0.901679		19.5	0.911347	0.886467	0.810677	0.790862	0.744083
20	0.956945	0.891935	0.944876	0.892285	0.900442		20	0.909068	0.882978	0.806749	0.78489	0.737912
20.5	0.955924	0.891274	0.9424	0.891078	0.897905		20.5	0.907129	0.879271	0.802504	0.779462	0.732724
21	0.953898	0.890732	0.94095	0.889424	0.894431		21	0.904927	0.875863	0.799526	0.773799	0.727241
21.5	0.952891	0.886591	0.938728	0.887213	0.891769		21.5	0.903031	0.87298	0.795022	0.768923	0.722246
22	0.95199	0.887035	0.937196	0.885965	0.889346		22	0.902058	0.870606	0.791281	0.765109	0.715882
22.5	0.950639	0.884932	0.934456	0.883885	0.887194		22.5	0.900726	0.867731	0.787645	0.759865	0.710794
23	0.947962	0.884401	0.932764	0.882018	0.884074		23	0.89731	0.863596	0.783587	0.754169	0.705304
23.5	0.947406	0.880477	0.930853	0.880557	0.880705		23.5	0.897234	0.862885	0.779473	0.75069	0.699511
24	0.945604	0.879122	0.929414	0.878406	0.877492		24	0.894211	0.857248	0.775026	0.74604	0.694817
24.5	0.94363	0.878103	0.927928	0.876113	0.876067		24.5	0.892742	0.854284	0.772445	0.740603	0.689285
25	0.941868	0.87768	0.924774	0.87375	0.874112		25	0.890215	0.851183	0.767365	0.735158	0.683424
25.5	0.94053	0.874905	0.923231	0.873831	0.872105		25.5	0.888012	0.849406	0.764078	0.731988	0.679243
26	0.93959	0.874233	0.924751	0.871193	0.868549		26	0.887124	0.846636	0.760743	0.726978	0.672703
26.5	0.939139	0.873355	0.922057	0.868809	0.866001		26.5	0.884776	0.842453	0.756571	0.720731	0.667783
27	0.937934	0.870959	0.918614	0.866049	0.863713		27	0.882727	0.839464	0.752765	0.718715	0.66372
27.5	0.935046	0.869637	0.91744	0.865329	0.860625		27.5	0.880012	0.835984	0.748342	0.713128	0.658649
28	0.934423	0.868434	0.915045	0.863036	0.858181		28	0.87874	0.834272	0.744358	0.707624	0.652512
28.5	0.934026	0.867317	0.914009	0.860631	0.856538		28.5	0.877425	0.831356	0.741558	0.703576	0.647877
29	0.93082	0.865268	0.911637	0.859942	0.853408		29	0.875546	0.828223	0.737119	0.699679	0.643889
29.5	0.930502	0.865225	0.910808	0.858643	0.85032		29.5	0.872985	0.825307	0.734084	0.696149	0.638432
30	0.929031	0.862417	0.908586	0.855143	0.848604		30	0.870586	0.822343	0.730148	0.691374	0.634419
30.5	0.928104	0.861073	0.907412	0.854392	0.846119		30.5	0.869331	0.81887	0.726163	0.686046	0.628693
31	0.925574	0.858005	0.905846	0.852282	0.844424		31	0.868366	0.817328	0.723761	0.682299	0.624084
31.5	0.924209	0.858818	0.903636	0.850232	0.840638		31.5	0.866769	0.813355	0.71963	0.676921	0.619349
32	0.923176	0.858515	0.902496	0.847503	0.838756		32	0.864208	0.810068	0.716522	0.673124	0.615176
32.5	0.921228	0.853919	0.900447	0.847523	0.835637		32.5	0.863021	0.808016	0.712367	0.67043	0.610164
33	0.920208	0.853149	0.900216	0.844206	0.833401		33	0.861219	0.805634	0.708723	0.665763	0.605168
33.5	0.918287	0.853615	0.896314	0.843333	0.831217		33.5	0.858675	0.802904	0.705193	0.661297	0.600391
34	0.917042	0.852954	0.896337	0.842126	0.828919		34	0.8566	0.799205	0.701793	0.656329	0.596899
34.5	0.916022	0.8511	0.89408	0.840391	0.825602		34.5	0.855951	0.79629	0.699772	0.653276	0.591727
35	0.915558	0.849355	0.891708	0.838819	0.823709		35	0.855063	0.79394	0.696355	0.648843	0.586765
35.5	0.912829	0.848011	0.891766	0.836303	0.821203		35.5	0.850922	0.791194	0.691746	0.643959	0.582903
36	0.911054	0.845474	0.888968	0.833107	0.819446		36	0.849402	0.788577	0.688581	0.641123	0.578898
36.5	0.909663	0.843187	0.887759	0.834121	0.817553		36.5	0.848659	0.785759	0.686658	0.636732	0.572669
37	0.910842	0.842114	0.887633	0.832691	0.814745		37	0.846687	0.782536	0.681691	0.632517	0.569504
37.5	0.907172	0.843035	0.886159	0.829941	0.812603		37.5	0.84556	0.779976	0.679062	0.629121	0.565776
38	0.908457	0.841214	0.88282	0.83056	0.811033		38	0.843135	0.777747	0.675824	0.625742	0.562468
38.5	0.905516	0.838591	0.879804	0.826573	0.808569		38.5	0.840719	0.775155	0.671547	0.621677	0.558069
39	0.902059	0.837539	0.880391	0.82565	0.80626		39	0.840147	0.772457	0.668787	0.618215	0.552821
39.5	0.904536	0.837908	0.879366	0.822454	0.803317		39.5	0.83762	0.769445	0.665842	0.613506	0.549597
40	0.901953	0.83522	0.876442	0.820963	0.801913		40	0.83534	0.766441	0.6612	0.610186	0.544678
40.5	0.899952	0.833962	0.875889	0.821023	0.799376		40.5	0.833632	0.76376	0.658643	0.606171	0.540799
41	0.900164	0.83342	0.873011	0.818315	0.796028		41	0.83248	0.763396	0.655008	0.602114	0.536618
41.5	0.898323	0.831512	0.871687	0.817158	0.794457		41.5	0.830712	0.758365	0.651997	0.597673	0.532495
42	0.895329	0.829171	0.870547	0.81311	0.793376		42	0.827963	0.755635	0.647752	0.594788	0.530237
42.5	0.895382	0.828661	0.867934	0.813211	0.790371		42.5	0.827186	0.753794	0.646211	0.591643	0.525292
43	0.893487	0.827805	0.866863	0.810817	0.787469		43	0.824607	0.750765	0.643386	0.587018	0.520506
43.5	0.89305	0.827068	0.865182	0.810563	0.784901		43.5	0.823455	0.747381	0.638939	0.584048	0.516208
44	0.891248	0.826764	0.862776	0.809295	0.783643		44	0.822797	0.745588	0.636878	0.579741	0.512816
44.5	0.89105	0.82387	0.863444	0.806627	0.781511		44.5	0.820236	0.743788	0.633867	0.576421	0.50908
45	0.889049	0.82245	0.861176	0.804862	0.779442		45	0.818297	0.741211	0.630621	0.573042	0.50641
45.5	0.888599	0.820759	0.858516	0.802711	0.778017		45.5	0.816778	0.738465	0.628129	0.569428	0.502699
46	0.885552	0.818992	0.85801	0.802011	0.775937		46	0.814558	0.737335	0.624421	0.565932	0.497737
46.5	0.884492	0.818949	0.856559	0.800661	0.772058		46.5	0.811936	0.734516	0.621231	0.562595	0.494967
47	0.884704	0.817474	0.855569	0.79848	0.770613		47	0.812176	0.731746	0.618432	0.559291	0.490954
47.5	0.883657	0.815003	0.854107	0.797618	0.768752		47.5	0.809298	0.72812	0.615169	0.556858	0.488645
48	0.880889	0.814949	0.850987	0.794787	0.765788		48	0.808043	0.726327	0.613319	0.552241	0.484204
48.5	0.881273	0.812509	0.849812	0.79292	0.764207		48.5	0.806173	0.723072	0.609448	0.548025	0.480585
49	0.878531	0.811469	0.848028	0.792048	0.761524		49	0.804004	0.720779	0.60651	0.545223	0.477739
49.5	0.876027	0.811165	0.846692	0.791003	0.759694		49.5	0.802339	0.718905	0.603832	0.542263	0.473499
50	0.877087	0.810547	0.846324	0.787898	0.757147		50	0.800478	0.717524	0.601081	0.538323	0.469394
50.5	0.874106	0.808997	0.844758	0.787097	0.755836		50.5	0.79918	0.71448	0.597794	0.535714	0.465935
51	0.874556	0.807285	0.843261	0.785636	0.75488		51	0.798207	0.711621	0.594962	0.532636	0.461812
51.5	0.873563	0.806656	0.842916	0.784297	0.751885		51.5	0.794476	0.709553	0.592308	0.528487	0.459596
52	0.872026	0.804358	0.839992	0.782288	0.747985		52	0.794092	0.707146	0.590125	0.525602	0.45628
52.5	0.870436	0.80245	0.838276	0.780786	0.746873		52.5	0.792623	0.704352	0.585248	0.522223	0.453131
53	0.868184	0.801507	0.837136	0.77963	0.74471		53	0.791855	0.702567	0.583706	0.518869	0.449655
53.5	0.867879	0.800444	0.833337	0.77892	0.742723		53.5	0.790642	0.699442	0.581499	0.51646	0.446264
54	0.86731	0.800152	0.833452	0.777773	0.741351		54	0.788192	0.697891	0.578545	0.513558	0.443056
54.5	0.866064	0.797691	0.832393	0.775744	0.739406		54.5	0.785545	0.695452	0.574812	0.510413	0.440193
55	0.864859	0.796282	0.831587	0.773989	0.735943		55	0.784401	0.693046	0.572661	0.507201	0.437104
55.5	0.862514	0.794591	0.830919	0.771483	0.736079		55.5	0.782488	0.690655	0.570616	0.505395	0.434442
56	0.861732	0.793864	0.82697	0.770854	0.733479		56	0.78172	0.687788	0.567232	0.500836	0.430933
56.5	0.859003	0.792531	0.825393	0.769911	0.730463		56.5	0.779969	0.686415	0.564846	0.497817	0.427407
57	0.858659	0.791458	0.824622	0.768663	0.728311		57	0.777681	0.683363	0.563482	0.494722	0.423419
57.5	0.85891	0.790266	0.823655	0.766187	0.726886		57.5	0.776733	0.68182	0.559587	0.491636	0.42137
58	0.856738	0.790309	0.822423	0.764807	0.724858		58	0.77547	0.679462	0.557737	0.48845	0.417895
58.5	0.856234	0.788477	0.82126	0.763783	0.721562		58.5	0.772319	0.677168	0.554783	0.485974	0.414049
59	0.853545	0.786862	0.818934	0.761338	0.721115		59	0.772447	0.673922	0.551033	0.483707	0.411111
59.5	0.853081	0.784488	0.816839	0.759836	0.719545		59.5	0.771064	0.672516	0.549151	0.480153	0.408684
60	0.849862	0.783848	0.816954	0.757634	0.717839		60	0.768963	0.669924	0.545515	0.477434	0.405528
60.5	0.850935	0.784011	0.814548	0.757919	0.715832		60.5	0.766991	0.668042	0.542431	0.47449	0.402388
61	0.847981	0.781919	0.811946	0.756062	0.712609		61	0.765198	0.665167	0.541336	0.47117	0.399793
61.5	0.846577	0.781442	0.811831	0.754124	0.710175		61.5	0.764916	0.663665	0.538731	0.46928	0.39662
62	0.846736	0.779621	0.809655	0.753201	0.710102		62	0.763175	0.661824	0.536126	0.465934	0.39348
62.5	0.845742	0.779003	0.807571	0.75108	0.707908		62.5	0.762116	0.659514	0.532928	0.463985	0.390541
63	0.84296	0.776401	0.807076	0.74967	0.705132		63	0.759213	0.65722	0.530834	0.460339	0.38861
63.5	0.842973	0.776173	0.80528	0.748899	0.70351		63.5	0.757078	0.655274	0.527978	0.457587	0.385638
64	0.841821	0.775816	0.804083	0.747408	0.701118		64	0.756241	0.652625	0.526282	0.45512	0.383052
64.5	0.840456	0.773463	0.802678	0.745298	0.700993		64.5	0.754466	0.650646	0.523441	0.452502	0.38003
65	0.840721	0.771772	0.801319	0.743522	0.697936		65	0.753569	0.64933	0.520439	0.449516	0.377243
65.5	0.837807	0.769572	0.799949	0.743644	0.695315		65.5	0.752638	0.645833	0.518694	0.445568	0.374271
66	0.836787	0.76903	0.800018	0.741047	0.694504		66	0.751204	0.644468	0.51703	0.44377	0.371769
66.5	0.836813	0.767447	0.79851	0.739576	0.691052		66.5	0.74971	0.641101	0.513362	0.441662	0.368679
67	0.835078	0.767501	0.797324	0.737902	0.689596		67	0.747661	0.638662	0.512088	0.43891	0.366765
67.5	0.833369	0.766959	0.795736	0.737546	0.687984		67.5	0.745996	0.638104	0.508793	0.435883	0.364103
68	0.832256	0.763848	0.794584	0.735761	0.686133		68	0.745031	0.635819	0.506659	0.434084	0.361031
68.5	0.830997	0.764575	0.791476	0.73363	0.68474		68.5	0.743605	0.633784	0.504646	0.431333	0.358697
69	0.828878	0.762818	0.790923	0.731845	0.682525		69	0.741598	0.631611	0.501798	0.428857	0.356102
69.5	0.829527	0.761875	0.789714	0.731165	0.680871		69.5	0.739899	0.630254	0.499533	0.426707	0.353651
70	0.827473	0.760596	0.787861	0.727715	0.678937		70	0.73937	0.627379	0.498422	0.423011	0.351308
70.5	0.826573	0.75923	0.786514	0.727888	0.677232		70.5	0.737918	0.625288	0.496092	0.421714	0.348168
71	0.825354	0.758125	0.784833	0.726072	0.675173		71	0.735417	0.62251	0.493788	0.418636	0.345893
71.5	0.824161	0.757648	0.783301	0.725788	0.67353		71.5	0.735152	0.621112	0.491053	0.415759	0.343282
72	0.822585	0.756434	0.782461	0.724591	0.672105		72	0.733649	0.619392	0.488172	0.414204	0.34094
72.5	0.82175	0.755339	0.782035	0.722998	0.66962		72.5	0.732369	0.617236	0.487482	0.410942	0.339353
73	0.820492	0.753507	0.779963	0.720137	0.668892		73	0.730593	0.614958	0.483895	0.409076	0.336608
73.5	0.819962	0.753051	0.780331	0.719995	0.665648		73.5	0.72827	0.613028	0.481688	0.406199	0.334223
74	0.819048	0.750753	0.777084	0.719782	0.664317		74	0.72757	0.610484	0.479099	0.404217	0.331369
74.5	0.816968	0.750103	0.775346	0.717377	0.663214		74.5	0.726067	0.607932	0.476867	0.401976	0.328976
75	0.816173	0.748726	0.773251	0.715734	0.661093		75	0.724607	0.607254	0.474376	0.399726	0.325693
75.5	0.814888	0.747621	0.773999	0.713755	0.660719		75.5	0.722541	0.60429	0.472899	0.396388	0.324602
76	0.814027	0.746417	0.771489	0.714354	0.657308		76	0.721499	0.603135	0.470756	0.394431	0.32215
76.5	0.811881	0.745301	0.77165	0.712041	0.655582		76.5	0.72161	0.600365	0.467721	0.392031	0.319606
77	0.811788	0.745333	0.768761	0.710275	0.653429		77	0.719467	0.599113	0.465749	0.38948	0.316844
77.5	0.810582	0.744217	0.767862	0.708206	0.652535		77.5	0.717828	0.596279	0.464856	0.387389	0.315887
78	0.81045	0.742428	0.765261	0.7078	0.650268		78	0.716171	0.594542	0.462487	0.385398	0.313184
78.5	0.807575	0.740596	0.764489	0.704888	0.648604		78.5	0.71501	0.593258	0.460442	0.383542	0.310514
79	0.806648	0.739588	0.763983	0.704939	0.647585		79	0.714267	0.591263	0.457845	0.381526	0.308423
79.5	0.805535	0.738894	0.761853	0.703985	0.645755		79.5	0.711672	0.590472	0.455499	0.378716	0.305963
80	0.803654	0.737301	0.761116	0.701621	0.643904		80	0.711023	0.586652	0.452789	0.376792	0.304142
80.5	0.802249	0.736455	0.760667	0.700759	0.641221		80.5	0.709016	0.585893	0.451937	0.373764	0.302538
81	0.801335	0.734959	0.76077	0.698304	0.638943		81	0.708239	0.582582	0.448861	0.371882	0.300372
81.5	0.801587	0.73522	0.756338	0.69808	0.639193		81.5	0.707548	0.581806	0.446702	0.369875	0.298315
82	0.800249	0.73252	0.756165	0.697046	0.636521		82	0.705029	0.580546	0.444487	0.3677	0.296174
82.5	0.79911	0.73239	0.754761	0.694185	0.635356		82.5	0.704372	0.577025	0.442685	0.365442	0.293429
83	0.801402	0.730764	0.753529	0.693525	0.631883		83	0.702092	0.574942	0.440729	0.36336	0.292102
83.5	0.797017	0.729257	0.751963	0.69109	0.631508		83.5	0.700931	0.573956	0.439374	0.36106	0.289835
84	0.797427	0.729225	0.750374	0.688757	0.630853		84	0.701033	0.571937	0.436282	0.357363	0.287233
84.5	0.796871	0.727621	0.748831	0.688929	0.62817		84.5	0.697959	0.570015	0.433758	0.355991	0.284815
85	0.794076	0.726526	0.749545	0.688077	0.625404		85	0.697148	0.56794	0.43401	0.354527	0.284269
85.5	0.791188	0.724986	0.746563	0.687438	0.625675		85.5	0.694911	0.567601	0.431981	0.35247	0.282187
86	0.790671	0.724726	0.744445	0.684293	0.623189		86	0.693204	0.565606	0.428889	0.350069	0.278803
86.5	0.790578	0.723024	0.743386	0.683846	0.621068		86.5	0.693101	0.562779	0.427485	0.348271	0.27683
87	0.789174	0.72232	0.74304	0.683156	0.620038		87	0.691573	0.561648	0.425172	0.346389	0.275126
87.5	0.78822	0.720932	0.740484	0.681797	0.619248		87.5	0.689916	0.559298	0.422527	0.3448	0.273439
88	0.785849	0.720575	0.740818	0.681411	0.617803		88	0.689327	0.558555	0.421163	0.342977	0.272255
88.5	0.784603	0.718146	0.738665	0.678388	0.615068		88.5	0.687867	0.555761	0.420206	0.340811	0.27008
89	0.78361	0.717062	0.739978	0.677627	0.612572		89	0.68639	0.55497	0.417722	0.337825	0.267847
89.5	0.784802	0.715111	0.735948	0.676755	0.610648		89.5	0.684674	0.552757	0.415207	0.33601	0.265387
90	0.782961	0.714125	0.735488	0.676653	0.611033		90	0.683393	0.550568	0.415207	0.334839	0.262701
90.5	0.781172	0.713388	0.734452	0.674066	0.608797		90.5	0.682018	0.549284	0.412196	0.33253	0.261659
91	0.780761	0.713366	0.733036	0.671185	0.607279		91	0.682018	0.547249	0.41123	0.331	0.260358
91.5	0.779596	0.713041	0.732552	0.671033	0.605709		91.5	0.68049	0.545052	0.409128	0.329126	0.259057
92	0.778496	0.7111	0.729616	0.669227	0.603369		92	0.677374	0.543477	0.407026	0.327755	0.256488
92.5	0.776125	0.710168	0.728568	0.667898	0.60209		92.5	0.676221	0.541878	0.40473	0.324903	0.254708
93	0.776416	0.708932	0.726784	0.666193	0.600374		93	0.675811	0.539875	0.402652	0.323464	0.252777
93.5	0.775091	0.707902	0.726462	0.665108	0.598503		93.5	0.674103	0.538624	0.400339	0.320779	0.251921
94	0.772482	0.706873	0.723779	0.664884	0.597712		94	0.673139	0.536992	0.399252	0.318947	0.249351
94.5	0.773886	0.705138	0.723664	0.663525	0.596589		94.5	0.670645	0.535175	0.3984	0.317233	0.247966
95	0.770958	0.704499	0.723261	0.661384	0.593345		95	0.66951	0.533705	0.395592	0.316338	0.24606
95.5	0.769541	0.702092	0.721154	0.661313	0.593022		95.5	0.668075	0.531089	0.394423	0.314339	0.243995
96	0.767818	0.701843	0.718115	0.659964	0.592076		96	0.667777	0.530515	0.39362	0.313001	0.241997
96.5	0.766361	0.701453	0.718667	0.658919	0.588842		96.5	0.666769	0.527761	0.38914	0.310475	0.240242
97	0.768256	0.69974	0.718633	0.656606	0.587542		97	0.666001	0.52609	0.388961	0.309137	0.238932
97.5	0.766229	0.699827	0.714776	0.655885	0.587241		97.5	0.663653	0.524248	0.387444	0.306753	0.237085
98	0.764414	0.698678	0.714327	0.654039	0.585483		98	0.662398	0.523465	0.385488	0.304737	0.235524
98.5	0.761897	0.696206	0.713671	0.652537	0.582291		98.5	0.661228	0.521357	0.384027	0.302981	0.233584
99	0.762228	0.694721	0.713233	0.652395	0.58149		99	0.659657	0.520097	0.381154	0.301534	0.232904
99.5	0.761499	0.695491	0.710746	0.650143	0.580273		99.5	0.660101	0.517763	0.38096	0.298941	0.231888
100	0.762228	0.693778	0.710666	0.649463	0.579587		100	0.657983	0.516931	0.378777	0.297862	0.228891
100.5	0.761022	0.692	0.710182	0.648885	0.57784		100.5	0.656182	0.515906	0.376237	0.295512	0.227724
101	0.760797	0.691859	0.707914	0.645405	0.574981		101	0.655208	0.512708	0.375109	0.295386	0.226331
101.5	0.757949	0.69032	0.707005	0.646267	0.57419		101.5	0.653005	0.511367	0.373485	0.293011	0.22508
102	0.759485	0.689875	0.706636	0.645212	0.573098		102	0.652912	0.510664	0.371911	0.290276	0.223997
102.5	0.754676	0.687469	0.704863	0.642382	0.569947		102.5	0.652117	0.508419	0.36955	0.2899	0.221856
103	0.755962	0.686504	0.703263	0.643072	0.569178		103	0.649044	0.506982	0.368089	0.288118	0.219463
103.5	0.752915	0.685431	0.702123	0.640302	0.569022		103.5	0.646977	0.505003	0.366669	0.286538	0.217985
104	0.75253	0.685301	0.7005	0.639906	0.566901		104	0.647413	0.503146	0.364607	0.284856	0.216768
104.5	0.751086	0.684607	0.699371	0.643193	0.564363		104.5	0.646192	0.502007	0.36408	0.282958	0.215198
105	0.751643	0.684152	0.697702	0.638587	0.562533		105	0.645133	0.500795	0.361759	0.28162	0.213938
105.5	0.750026	0.682201	0.697322	0.637005	0.562169		105.5	0.643263	0.499003	0.360558	0.28044	0.213099
106	0.749722	0.682027	0.69426	0.634762	0.560495		106	0.643186	0.496693	0.358772	0.278065	0.210639
106.5	0.747933	0.679718	0.694329	0.634489	0.560786		106.5	0.641607	0.495982	0.357052	0.276693	0.209455
107	0.746675	0.678276	0.694179	0.632277	0.55802		107	0.639652	0.494432	0.355697	0.275547	0.208733
107.5	0.743774	0.677138	0.692579	0.630694	0.556481		107.5	0.638823	0.493398	0.353611	0.273373	0.207516
108	0.745337	0.67678	0.691186	0.630583	0.5554		108	0.636749	0.491871	0.352564	0.271365	0.206072
108.5	0.743972	0.675241	0.68871	0.629081	0.553673		108.5	0.635024	0.489901	0.35116	0.270964	0.20493
109	0.742184	0.675696	0.689102	0.627671	0.551947		109	0.63569	0.487858	0.349302	0.268898	0.202898
109.5	0.74323	0.674244	0.686707	0.626484	0.551271		109.5	0.633888	0.486743	0.347573	0.26797	0.201437
110	0.741892	0.672856	0.685487	0.624029	0.549223		110	0.632582	0.483723	0.345536	0.265912	0.199909
110.5	0.740515	0.672596	0.685855	0.622923	0.548692		110.5	0.630482	0.483432	0.34401	0.264649	0.198197
111	0.738156	0.670016	0.684082	0.6234	0.544938		111	0.629986	0.482116	0.342939	0.262341	0.197105
111.5	0.738103	0.669453	0.68338	0.621107	0.544814		111.5	0.628706	0.480791	0.342387	0.261881	0.195191
112	0.738673	0.66877	0.68125	0.619727	0.544075		112	0.627519	0.47916	0.340261	0.260509	0.19478
112.5	0.735613	0.668065	0.680801	0.61922	0.542453		112.5	0.62658	0.477488	0.337883	0.258962	0.193554
113	0.733096	0.667967	0.678567	0.616653	0.540904		113	0.625606	0.475849	0.336544	0.257674	0.191682
113.5	0.73303	0.665789	0.677819	0.617251	0.539157		113.5	0.62453	0.473087	0.335376	0.254721	0.189885
114	0.732394	0.66374	0.677842	0.615141	0.538231		114	0.623139	0.472513	0.33454	0.253492	0.189566
114.5	0.731148	0.662818	0.677278	0.61505	0.536921		114.5	0.621892	0.47173	0.333176	0.251451	0.188785
115	0.730287	0.663783	0.675643	0.61294	0.536068		115	0.620125	0.469347	0.330953	0.252446	0.187509
115.5	0.7303	0.660531	0.674941	0.61298	0.53482		115.5	0.620159	0.468685	0.329638	0.249494	0.185242
116	0.729161	0.660921	0.673709	0.610687	0.532813		116	0.618417	0.466125	0.327901	0.248432	0.184898
116.5	0.726949	0.66064	0.672028	0.610647	0.531503		116.5	0.615881	0.466149	0.325921	0.246684	0.183017
117	0.724564	0.657724	0.669679	0.608202	0.529091		117	0.61653	0.463751	0.325889	0.246525	0.181263
117.5	0.725518	0.65729	0.670842	0.606233	0.529226		117.5	0.613892	0.46174	0.323511	0.244317	0.180582
118	0.724895	0.656011	0.668965	0.605635	0.527853		118	0.613533	0.461166	0.323292	0.243163	0.179609
118.5	0.724034	0.654612	0.667227	0.605675	0.525025		118.5	0.611868	0.458663	0.320955	0.241632	0.178593
119	0.722074	0.653518	0.667089	0.603433	0.524526		119	0.610391	0.45855	0.319689	0.24031	0.177753
119.5	0.721968	0.652748	0.664614	0.603119	0.52335		119.5	0.60946	0.456846	0.318155	0.239717	0.175738
120	0.721239	0.6511	0.664211	0.601333	0.521988		120	0.608581	0.454867	0.316678	0.2375	0.174504
120.5	0.718656	0.651306	0.662875	0.600501	0.521759		120.5	0.606865	0.453736	0.316134	0.235526	0.173681
121	0.719013	0.649843	0.660768	0.600227	0.519638		121	0.606045	0.452864	0.314462	0.235267	0.172615
121.5	0.717079	0.649973	0.660745	0.598127	0.518796		121.5	0.606677	0.449941	0.313505	0.234046	0.17144
122	0.715953	0.648347	0.659306	0.596788	0.516259		122	0.606592	0.448487	0.312125	0.231955	0.170071
122.5	0.716403	0.646743	0.657487	0.594891	0.514158		122.5	0.603697	0.44919	0.309569	0.231579	0.168871
123	0.715026	0.646873	0.65789	0.596047	0.512775		123	0.601059	0.446597	0.308571	0.230006	0.167485
123.5	0.713317	0.64593	0.655656	0.59482	0.513139		123.5	0.600205	0.445547	0.306793	0.227965	0.166704
124	0.712138	0.644878	0.656232	0.592588	0.512369		124	0.598438	0.443197	0.305763	0.227246	0.165269
124.5	0.712986	0.643079	0.653619	0.590833	0.510643		124.5	0.59784	0.44159	0.305081	0.226652	0.16369
125	0.712403	0.643902	0.651581	0.590447	0.508615		125	0.598207	0.442099	0.303223	0.225247	0.163917
125.5	0.710521	0.642016	0.650326	0.588814	0.506931		125.5	0.596269	0.440128	0.3016	0.223206	0.163355
126	0.708548	0.639967	0.650084	0.588357	0.505558		126	0.593878	0.43815	0.299757	0.221667	0.160819
126.5	0.707421	0.640011	0.648944	0.585851	0.504445		126.5	0.59387	0.435694	0.299254	0.220572	0.160592
127	0.706693	0.639024	0.648461	0.58578	0.504841		127	0.591966	0.43454	0.29772	0.219426	0.158888
127.5	0.70656	0.637268	0.646849	0.585253	0.501357		127.5	0.591889	0.434693	0.297534	0.219183	0.157797
128	0.704639	0.636293	0.645997	0.58365	0.499849		128	0.590856	0.43307	0.294896	0.217619	0.156949
128.5	0.704507	0.635881	0.645698	0.580819	0.499839		128.5	0.589788	0.431027	0.294555	0.216557	0.155832
129	0.704109	0.636206	0.644777	0.581032	0.497457		129	0.587201	0.43076	0.293549	0.214901	0.155412
129.5	0.701937	0.633561	0.642474	0.579581	0.496958		129.5	0.587637	0.428838	0.291447	0.214382	0.154119
130	0.699685	0.633117	0.64214	0.579815	0.495107		130	0.586646	0.428426	0.290928	0.21225	0.152255
130.5	0.699711	0.631295	0.64168	0.578526	0.494359		130.5	0.584418	0.426762	0.289532	0.211229	0.151634
131	0.699287	0.631306	0.63963	0.575868	0.4931		131	0.58452	0.425284	0.288729	0.209414	0.151088
131.5	0.698254	0.630515	0.637443	0.575381	0.491613		131.5	0.582761	0.423169	0.286489	0.207725	0.150534
132	0.696214	0.630005	0.636326	0.574032	0.489284		132	0.582573	0.422652	0.284971	0.206704	0.149174
132.5	0.697128	0.629301	0.636499	0.573545	0.489076		132.5	0.58008	0.421553	0.282772	0.207014	0.148158
133	0.694664	0.626558	0.63529	0.572408	0.487516		133	0.578492	0.419987	0.282804	0.205902	0.147361
133.5	0.695631	0.626005	0.633125	0.571049	0.4863		133.5	0.579056	0.418137	0.280987	0.204162	0.146177
134	0.69269	0.626157	0.631847	0.571353	0.485852		134	0.577066	0.417677	0.281133	0.203208	0.145942
134.5	0.690703	0.623762	0.631997	0.568228	0.484469		134.5	0.575324	0.415957	0.278836	0.20284	0.143499
135	0.691551	0.623111	0.630489	0.567782	0.482795		135	0.574641	0.414479	0.277424	0.201218	0.142995
135.5	0.690001	0.622276	0.629407	0.567001	0.481537		135.5	0.573361	0.414608	0.276134	0.201126	0.14292
136	0.689484	0.620759	0.62974	0.566656	0.48161		136	0.572703	0.411765	0.276409	0.199068	0.14114
136.5	0.688252	0.619805	0.628693	0.565722	0.479946		136.5	0.571141	0.410982	0.274713	0.198148	0.140141
137	0.68592	0.618905	0.626862	0.564109	0.478334		137	0.57056	0.408866	0.273025	0.197864	0.139763
137.5	0.688689	0.619133	0.626287	0.562659	0.477128		137.5	0.569314	0.407679	0.272051	0.19589	0.139788
138	0.686119	0.618558	0.623408	0.562101	0.475214		138	0.569322	0.406039	0.271621	0.194209	0.13758
138.5	0.686013	0.617734	0.622211	0.559797	0.474331		138.5	0.567273	0.405547	0.270437	0.192344	0.136346
139	0.684344	0.616759	0.622142	0.560396	0.472958		139	0.566411	0.403713	0.268156	0.19231	0.135221
139.5	0.681204	0.615447	0.621417	0.559402	0.472105		139.5	0.565266	0.402801	0.267304	0.191357	0.135624
140	0.682211	0.614515	0.620484	0.557393	0.470608		140	0.563841	0.402349	0.266022	0.190571	0.134264
140.5	0.681774	0.614558	0.619206	0.555841	0.469287		140.5	0.563525	0.39999	0.264853	0.18914	0.132601
141	0.679747	0.613236	0.619644	0.554106	0.466989		141	0.561894	0.399167	0.264123	0.188488	0.132929
141.5	0.679323	0.611675	0.616431	0.553101	0.466635		141.5	0.559691	0.398028	0.263149	0.186698	0.131644
142	0.67813	0.610623	0.614463	0.553345	0.466542		142	0.55987	0.396897	0.261656	0.185895	0.130989
142.5	0.677296	0.609886	0.614451	0.551661	0.4644		142.5	0.559324	0.39609	0.260252	0.185452	0.12978
143	0.677203	0.609019	0.613611	0.551012	0.463651		143	0.556959	0.394789	0.259732	0.184264	0.128026
143.5	0.67405	0.607523	0.613162	0.550454	0.462715		143.5	0.555985	0.394232	0.258539	0.183888	0.127698
144	0.67458	0.606038	0.611573	0.549409	0.460105		144	0.555575	0.391454	0.258677	0.182299	0.127119
144.5	0.672527	0.605799	0.610537	0.5467	0.46127		144.5	0.554756	0.390275	0.256454	0.180659	0.125943
145	0.673547	0.605778	0.610652	0.547369	0.459699		145	0.553467	0.389176	0.255602	0.180509	0.125616
145.5	0.672447	0.603783	0.60904	0.545645	0.458046		145.5	0.552792	0.388127	0.253889	0.180183	0.124944
146	0.670592	0.603447	0.608257	0.545614	0.456725		146	0.550009	0.387157	0.252461	0.177874	0.123005
146.5	0.670977	0.602081	0.605436	0.543869	0.454895		146.5	0.549846	0.386172	0.25169	0.176394	0.123223
147	0.669029	0.600726	0.606139	0.542449	0.453512		147	0.549462	0.38484	0.25083	0.175783	0.122535
147.5	0.668539	0.600618	0.605057	0.541089	0.453335		147.5	0.548941	0.384121	0.250351	0.175541	0.121502
148	0.667453	0.598764	0.602719	0.539649	0.452088		148	0.547268	0.38169	0.24941	0.174027	0.121166
148.5	0.666711	0.598168	0.601752	0.538025	0.45163		148.5	0.54568	0.381367	0.247137	0.173433	0.120159
149	0.665254	0.597951	0.601246	0.539486	0.449363		149	0.546303	0.38043	0.246553	0.172446	0.118816
149.5	0.664538	0.595707	0.600175	0.538715	0.447907		149.5	0.543673	0.378807	0.246399	0.171911	0.118253
150	0.663213	0.595436	0.599876	0.53697	0.447782		150	0.543118	0.379574	0.244402	0.170564	0.118144
150.5	0.662803	0.594157	0.598471	0.534647	0.448292		150.5	0.542247	0.376844	0.24463	0.169903	0.117136
151	0.660961	0.593886	0.596238	0.533034	0.44615		151	0.540813	0.375932	0.242787	0.168306	0.117178
151.5	0.660193	0.593214	0.595098	0.533734	0.443935		151.5	0.538567	0.374963	0.240588	0.167863	0.115827
152	0.659888	0.593431	0.593647	0.533186	0.443321		152	0.538064	0.37342	0.241286	0.165454	0.113887
152.5	0.65806	0.591393	0.594062	0.532029	0.440597		152.5	0.53709	0.372386	0.239152	0.166307	0.113165
153	0.658232	0.589463	0.593198	0.530558	0.439692		153	0.536458	0.3717	0.238154	0.165253	0.112477
153.5	0.657967	0.588856	0.590884	0.529036	0.43912		153.5	0.535707	0.369875	0.236823	0.164308	0.11293
154	0.655834	0.588195	0.590815	0.528245	0.437404		154	0.535886	0.368841	0.237188	0.163865	0.112166
154.5	0.654178	0.587512	0.588501	0.527707	0.437124		154.5	0.532795	0.367056	0.236831	0.162619	0.110722
155	0.654695	0.587512	0.589905	0.525993	0.436437		155	0.532138	0.365667	0.234469	0.161782	0.10974
155.5	0.653476	0.586363	0.58804	0.524836	0.43495		155.5	0.530627	0.3649	0.232733	0.16016	0.108447
156	0.652893	0.585312	0.586659	0.525141	0.434056		156	0.531182	0.363584	0.232806	0.160026	0.109303
156.5	0.651039	0.584672	0.585323	0.523152	0.434098		156.5	0.530311	0.36389	0.231621	0.15893	0.107985
157	0.64974	0.582949	0.584356	0.521123	0.432132		157	0.52897	0.362655	0.230696	0.158604	0.107406
157.5	0.649277	0.581691	0.583228	0.522807	0.430302		157.5	0.527826	0.359747	0.229227	0.156588	0.107162
158	0.64774	0.582027	0.583573	0.521458	0.429314		158	0.526349	0.360127	0.228659	0.157199	0.106952
158.5	0.647197	0.581344	0.582203	0.519297	0.428056		158.5	0.525649	0.358722	0.228334	0.155785	0.105525
159	0.647091	0.57948	0.579785	0.520737	0.427141		159	0.52453	0.356703	0.226476	0.154363	0.104644
159.5	0.645713	0.578753	0.579728	0.51881	0.425352		159.5	0.524138	0.355847	0.227011	0.153661	0.104896
160	0.644309	0.578309	0.578738	0.516537	0.423335		160	0.522865	0.355354	0.225672	0.153443	0.104232
160.5	0.645369	0.576672	0.578588	0.515918	0.424333		160.5	0.521286	0.354522	0.224853	0.151637	0.103854
161	0.643593	0.57652	0.577264	0.51464	0.423241		161	0.520458	0.352269	0.2234	0.150834	0.101814
161.5	0.640652	0.575274	0.576884	0.513686	0.422753		161.5	0.517871	0.351994	0.222085	0.15121	0.10147
162	0.64199	0.575079	0.57533	0.512266	0.421463		162	0.518016	0.351308	0.22198	0.14968	0.101252
162.5	0.639804	0.57394	0.573787	0.512296	0.419966		162.5	0.51846	0.350242	0.219732	0.150483	0.100404
163	0.638943	0.572336	0.573614	0.510683	0.418073		163	0.517725	0.348901	0.219269	0.148308	0.09969
163.5	0.639725	0.570222	0.571358	0.509679	0.418853		163.5	0.515787	0.348134	0.218636	0.148316	0.099581
164	0.639076	0.570396	0.572486	0.508309	0.417751		164	0.51472	0.346341	0.218612	0.147748	0.099203
164.5	0.636519	0.570992	0.571554	0.509445	0.414995		164.5	0.514532	0.34492	0.217305	0.146225	0.098599
165	0.636665	0.570266	0.568802	0.50768	0.414402		165	0.512824	0.34559	0.215926	0.145364	0.096735
165.5	0.635923	0.567902	0.568284	0.506199	0.413206		165.5	0.512261	0.343595	0.214603	0.144586	0.096743
166	0.633803	0.567957	0.567179	0.504302	0.411303		166	0.511834	0.34202	0.213385	0.143892	0.096391
166.5	0.633326	0.566981	0.56742	0.503876	0.411792		166.5	0.510468	0.341181	0.213361	0.1437	0.095518
167	0.633936	0.565333	0.565072	0.502871	0.411335		167	0.508427	0.340817	0.213053	0.143022	0.095274
167.5	0.632399	0.564043	0.564208	0.503429	0.409442		167.5	0.507266	0.340171	0.211519	0.141726	0.094703
168	0.630306	0.564098	0.563667	0.501877	0.408277		168	0.507155	0.339057	0.210602	0.142286	0.094048
168.5	0.630134	0.563707	0.563103	0.499878	0.407498		168.5	0.505695	0.337207	0.209514	0.140438	0.092965
169	0.628517	0.563415	0.561767	0.500041	0.40653		169	0.50555	0.336787	0.209092	0.139651	0.093091
169.5	0.626199	0.560997	0.561917	0.498864	0.405751		169.5	0.50432	0.33535	0.207494	0.139007	0.092613
170	0.628226	0.560217	0.560386	0.497575	0.405574		170	0.503424	0.33581	0.208273	0.137502	0.092084
170.5	0.628199	0.559198	0.55859	0.49651	0.403348		170.5	0.50228	0.334574	0.206682	0.138664	0.091001
171	0.624742	0.558753	0.557485	0.495637	0.402662		171	0.501059	0.33287	0.205165	0.137042	0.091202
171.5	0.625576	0.557528	0.556771	0.494116	0.401321		171.5	0.501153	0.331659	0.203899	0.135495	0.090472
172	0.623218	0.55639	0.556103	0.49371	0.399594		172	0.499658	0.330843	0.203623	0.135118	0.08917
172.5	0.623496	0.55432	0.554215	0.49306	0.398763		172.5	0.498668	0.329753	0.202495	0.134784	0.089296
173	0.621999	0.554818	0.554319	0.491011	0.398638		173	0.497199	0.329147	0.202689	0.133956	0.089557
173.5	0.621827	0.555675	0.551958	0.491113	0.397972		173.5	0.496371	0.327257	0.201294	0.13204	0.088398
174	0.62094	0.554255	0.552097	0.490321	0.396849		174	0.496849	0.327556	0.199524	0.13281	0.087307
174.5	0.620741	0.553106	0.549495	0.488799	0.39557		174.5	0.494664	0.326741	0.199492	0.132149	0.087827
175	0.619019	0.552206	0.550934	0.489236	0.394624		175	0.493152	0.325561	0.198104	0.131681	0.08598
175.5	0.617919	0.550569	0.550531	0.487694	0.393085		175.5	0.493673	0.324665	0.198445	0.130393	0.085527
176	0.616343	0.551089	0.547998	0.486983	0.392721		176	0.492802	0.322307	0.197009	0.129782	0.084696
176.5	0.614819	0.549995	0.547768	0.485482	0.390641		176.5	0.491479	0.322363	0.195783	0.128327	0.084519
177	0.61311	0.548802	0.547157	0.485441	0.390932		177	0.489558	0.321507	0.19657	0.127574	0.083831
177.5	0.61515	0.548206	0.545799	0.484599	0.391015		177.5	0.488841	0.320684	0.19472	0.1278	0.082983
178	0.613666	0.54865	0.542736	0.484325	0.388343		178	0.487944	0.31856	0.193332	0.126721	0.08373
178.5	0.613746	0.545864	0.542748	0.482418	0.388551		178.5	0.487816	0.318584	0.19287	0.12637	0.083134
179	0.612673	0.545084	0.543347	0.481525	0.386534		179	0.4854	0.318115	0.19145	0.12652	0.083134
179.5	0.610805	0.543783	0.542449	0.479567	0.387002		179.5	0.485007	0.315717	0.191141	0.125558	0.081245
180	0.610845	0.542678	0.5417	0.478725	0.385099		180	0.484085	0.314174	0.190752	0.124596	0.082177
180.5	0.608632	0.542081	0.539824	0.478319	0.384183		180.5	0.483581	0.313835	0.18934	0.12376	0.080556
181	0.609414	0.542916	0.538983	0.478289	0.382759		181	0.48388	0.312389	0.189096	0.123927	0.081186
181.5	0.608169	0.541268	0.538857	0.476787	0.381865		181.5	0.482087	0.311889	0.187952	0.122171	0.079851
182	0.606579	0.539176	0.538419	0.476432	0.381303		182	0.480908	0.311525	0.187108	0.121987	0.078827
182.5	0.607347	0.538905	0.536761	0.475235	0.379847		182.5	0.479107	0.310136	0.186605	0.12233	0.07907
183	0.606672	0.538331	0.534758	0.474931	0.379244		183	0.479901	0.309627	0.186337	0.121059	0.079121
183.5	0.603943	0.538396	0.534574	0.474129	0.37835		183.5	0.47798	0.308763	0.185136	0.120038	0.07855
184	0.605188	0.537312	0.533181	0.472039	0.376145		184	0.477203	0.307625	0.184543	0.120055	0.077551
184.5	0.603492	0.536911	0.531845	0.470862	0.374793		184.5	0.475965	0.306857	0.184819	0.119076	0.076199
185	0.601465	0.536087	0.531753	0.470355	0.375968		185	0.475914	0.306203	0.183221	0.1188	0.077173
185.5	0.600988	0.533474	0.530049	0.469837	0.373857		185.5	0.47494	0.305056	0.181273	0.117404	0.075645
186	0.600366	0.533442	0.530118	0.469259	0.372922		186	0.47424	0.303651	0.18163	0.116391	0.076149
186.5	0.598948	0.532488	0.529508	0.468417	0.372318		186.5	0.472831	0.302706	0.181054	0.116266	0.075653
187	0.59708	0.532726	0.528506	0.465698	0.372058		187	0.471815	0.302601	0.179828	0.116743	0.075779
187.5	0.596868	0.532369	0.527286	0.465627	0.371247		187.5	0.47103	0.3008	0.179171	0.115789	0.073773
188	0.597305	0.532098	0.525697	0.465302	0.369688		188	0.470313	0.300873	0.179098	0.115572	0.073739
188.5	0.597319	0.530797	0.524028	0.464349	0.368408		188.5	0.470944	0.300348	0.177662	0.114894	0.074864
189	0.595305	0.530428	0.524684	0.462969	0.368304		189	0.468075	0.299718	0.17758	0.113799	0.073345
189.5	0.594444	0.529257	0.52458	0.463121	0.367057		189.5	0.467734	0.29845	0.17659	0.112486	0.072648
190	0.594417	0.528824	0.52351	0.46097	0.366235		190	0.466154	0.29677	0.17668	0.111674	0.072455
190.5	0.592669	0.526222	0.52245	0.460118	0.365497		190.5	0.466052	0.29547	0.175438	0.11088	0.071447
191	0.591609	0.52439	0.521645	0.460321	0.364114		191	0.465505	0.29526	0.175146	0.111599	0.071724
191.5	0.591622	0.523783	0.51948	0.458637	0.363635		191.5	0.464336	0.294889	0.174294	0.111641	0.071749
192	0.592192	0.524401	0.520148	0.458972	0.3614		192	0.462167	0.293185	0.17302	0.110963	0.070893
192.5	0.589993	0.523675	0.51925	0.459357	0.361285		192.5	0.461757	0.291796	0.172297	0.109717	0.071758
193	0.588244	0.522222	0.517603	0.457409	0.360817		193	0.4611	0.291303	0.171697	0.10914	0.070095
193.5	0.587661	0.521886	0.516118	0.45538	0.360932		193.5	0.460878	0.289615	0.171194	0.108379	0.068853
194	0.586694	0.522287	0.515105	0.454122	0.359798		194	0.460417	0.28913	0.170837	0.107777	0.06819
194.5	0.584945	0.520033	0.515427	0.454203	0.358446		194.5	0.459477	0.289332	0.169765	0.107994	0.068752
195	0.585356	0.519252	0.513344	0.451921	0.355639		195	0.458265	0.288218	0.168361	0.107283	0.067636
195.5	0.584852	0.51948	0.513332	0.451464	0.357864		195.5	0.456728	0.288315	0.166966	0.10694	0.067619
196	0.585064	0.519892	0.512204	0.450074	0.354703		196	0.45584	0.286659	0.167079	0.10464	0.067367
196.5	0.582097	0.51703	0.512503	0.450825	0.353965		196.5	0.455251	0.285084	0.167371	0.103938	0.067342
197	0.58207	0.516098	0.511018	0.448897	0.354225		197	0.454688	0.284301	0.16617	0.104565	0.066007
197.5	0.580653	0.515469	0.509959	0.448674	0.353434		197.5	0.454278	0.284527	0.164937	0.104297	0.06573
198	0.582017	0.515718	0.509026	0.448065	0.351854		198	0.452732	0.28296	0.165351	0.104122	0.065469
198.5	0.580322	0.514775	0.506712	0.446878	0.350117		198.5	0.452143	0.282338	0.163939	0.102742	0.065024
199	0.578997	0.513409	0.50784	0.446422	0.348266		199	0.451366	0.281975	0.163013	0.102976	0.064689
199.5	0.577288	0.511068	0.506747	0.445732	0.349139		199.5	0.45006	0.281345	0.162535	0.101479	0.064873
200	0.577036	0.511523	0.50487	0.444839	0.347268		200	0.450213	0.280174	0.163005	0.101797	0.065209
200.5	0.575778	0.511274	0.505791	0.443408	0.346602		200.5	0.448378	0.279035	0.161585	0.100325	0.06358
201	0.575181	0.509171	0.503454	0.442627	0.346186		201	0.447131	0.278858	0.160798	0.101211	0.063287
201.5	0.576599	0.509453	0.503178	0.4428	0.346061		201.5	0.447037	0.277751	0.159719	0.099898	0.063177
202	0.575234	0.507892	0.502153	0.442079	0.345167		202	0.445808	0.277073	0.159986	0.10035	0.062716
202.5	0.573181	0.507165	0.502383	0.440324	0.343857		202.5	0.444578	0.274989	0.15954	0.098183	0.062858
203	0.572134	0.507263	0.500875	0.439939	0.344262		203	0.443511	0.275264	0.157982	0.098384	0.062229
203.5	0.569763	0.506493	0.498791	0.439502	0.34316		203.5	0.444228	0.274069	0.157657	0.09784	0.061398
204	0.569657	0.506699	0.499067	0.438011	0.341195		204	0.443169	0.27402	0.157568	0.097548	0.060986
204.5	0.570532	0.50413	0.499275	0.436296	0.340197		204.5	0.442427	0.271993	0.155888	0.095925	0.062061
205	0.56971	0.502797	0.496189	0.435799	0.339781		205	0.440864	0.270854	0.15575	0.0958	0.06086
205.5	0.568809	0.503783	0.497145	0.437118	0.339552		205.5	0.439191	0.271573	0.154703	0.095791	0.060029
206	0.568756	0.501756	0.495176	0.43583	0.338086		206	0.439788	0.270943	0.155085	0.095925	0.060239
206.5	0.567286	0.50219	0.49361	0.434896	0.338377		206.5	0.438106	0.269732	0.154038	0.094988	0.059584
207	0.563788	0.499772	0.494163	0.432218	0.335569		207	0.437474	0.267995	0.153194	0.094311	0.05908
207.5	0.564808	0.499046	0.493322	0.431335	0.336151		207.5	0.436783	0.267244	0.152796	0.09355	0.059819
208	0.564437	0.498005	0.492068	0.432066	0.334685		208	0.434631	0.266913	0.151352	0.093659	0.059315
208.5	0.564928	0.498602	0.491503	0.430443	0.332938		208.5	0.435314	0.266614	0.151003	0.092914	0.058828
209	0.561576	0.497301	0.489569	0.429925	0.332491		209	0.435323	0.266065	0.1511	0.092345	0.058518
209.5	0.562	0.495285	0.488648	0.429966	0.332366		209.5	0.433931	0.264289	0.149412	0.092145	0.057695
210	0.561695	0.496087	0.488372	0.427916	0.331711		210	0.432488	0.26357	0.147943	0.091417	0.057619
210.5	0.558966	0.493463	0.487416	0.427531	0.330879		210.5	0.431839	0.262891	0.148325	0.091977	0.057183
211	0.559615	0.495252	0.487992	0.425867	0.329891		211	0.431105	0.262148	0.148333	0.091091	0.057821
211.5	0.559708	0.493919	0.485344	0.4261	0.328768		211.5	0.429705	0.261664	0.147765	0.090664	0.057275
212	0.556714	0.493724	0.484791	0.425745	0.328332		212	0.429047	0.260008	0.148333	0.090305	0.05631
212.5	0.557602	0.492184	0.485125	0.425248	0.327302		212.5	0.427809	0.259419	0.147335	0.089627	0.056419
213	0.556277	0.490959	0.484607	0.42327	0.326179		213	0.428364	0.258369	0.145987	0.089209	0.055688
213.5	0.554488	0.490786	0.483571	0.421839	0.326127		213.5	0.426776	0.257795	0.145768	0.088741	0.055563
214	0.554515	0.489453	0.481786	0.421758	0.32439		214	0.425897	0.25845	0.144616	0.088515	0.054589
214.5	0.554303	0.488759	0.48098	0.421768	0.324557		214.5	0.42494	0.256996	0.143699	0.08808	0.054857
215	0.553018	0.488173	0.481429	0.419932	0.322924		215	0.424667	0.25555	0.143618	0.088364	0.054656
215.5	0.550408	0.486959	0.480808	0.419567	0.321999		215.5	0.423899	0.255663	0.142993	0.087185	0.053606
216	0.550064	0.485995	0.478851	0.41908	0.322394		216	0.423292	0.255243	0.142587	0.087018	0.054194
216.5	0.550819	0.48593	0.477803	0.417964	0.320543		216.5	0.423045	0.253612	0.1418	0.086273	0.052532
217	0.550633	0.485322	0.476133	0.417264	0.320439		217	0.421969	0.253152	0.142035	0.08552	0.053094
217.5	0.551402	0.484835	0.476456	0.41494	0.321188		217.5	0.42062	0.252489	0.141118	0.086859	0.052616
218	0.547825	0.483534	0.474913	0.415407	0.319378		218	0.419493	0.25215	0.140396	0.08532	0.052742
218.5	0.547242	0.483848	0.475443	0.414534	0.318369		218.5	0.41881	0.251528	0.139901	0.083588	0.052784
219	0.546142	0.482396	0.474107	0.415021	0.317101		219	0.418699	0.250333	0.140274	0.085144	0.052708
219.5	0.547136	0.481821	0.473578	0.412505	0.316061		219.5	0.41811	0.249041	0.139016	0.08394	0.051709
220	0.546142	0.480759	0.473106	0.413418	0.315083		220	0.416342	0.250155	0.138075	0.083823	0.051818
220.5	0.544235	0.479393	0.471735	0.412211	0.314771		220.5	0.415796	0.248871	0.137296	0.083931	0.050592
221	0.544102	0.47987	0.471137	0.409928	0.314771		221	0.415574	0.246949	0.137012	0.082652	0.050844
221.5	0.542221	0.479664	0.469629	0.409928	0.313534		221.5	0.413764	0.246594	0.137158	0.082225	0.051239
222	0.542062	0.478428	0.4685	0.410628	0.311829		222	0.412645	0.245431	0.136492	0.08118	0.051323
222.5	0.54287	0.477713	0.467879	0.408427	0.311745		222.5	0.411629	0.244575	0.136289	0.08077	0.050878
223	0.541161	0.475328	0.467268	0.407311	0.311288		223	0.412483	0.245116	0.134812	0.081949	0.049753
223.5	0.539691	0.475621	0.466463	0.40654	0.310071		223.5	0.411843	0.244163	0.133831	0.082091	0.049367
224	0.540459	0.473409	0.466831	0.406783	0.309479		224	0.410118	0.243783	0.133977	0.079289	0.049501
224.5	0.539068	0.474688	0.465346	0.40519	0.309073		224.5	0.408581	0.242306	0.132629	0.079532	0.049383
225	0.537796	0.474092	0.464217	0.404795	0.308428		225	0.408632	0.241175	0.1331	0.078813	0.049173
225.5	0.535915	0.47368	0.464287	0.403831	0.307191		225.5	0.408974	0.240747	0.13228	0.079783	0.049022
226	0.535266	0.47394	0.463273	0.403912	0.306463		226	0.407471	0.24065	0.132475	0.0799	0.048787
226.5	0.535411	0.470992	0.461431	0.402279	0.306515		226.5	0.40701	0.239673	0.132094	0.079766	0.048325
227	0.534815	0.468965	0.462433	0.402208	0.305371		227	0.405815	0.239132	0.131104	0.078737	0.04778
227.5	0.534921	0.469106	0.460372	0.401153	0.304913		227.5	0.405123	0.237444	0.131485	0.077433	0.047536
228	0.534285	0.469799	0.459762	0.399377	0.304518		228	0.404858	0.237492	0.13043	0.077516	0.047083
228.5	0.532828	0.46942	0.459543	0.400138	0.303291		228.5	0.403287	0.237355	0.129221	0.076546	0.046697
229	0.532232	0.468564	0.45792	0.3989	0.302324		229	0.40403	0.236176	0.128531	0.075885	0.048023
229.5	0.531424	0.46723	0.457782	0.398494	0.301232		229.5	0.402382	0.235344	0.12862	0.07581	0.046932
230	0.529821	0.465843	0.455491	0.397368	0.300192		230	0.401341	0.234205	0.128215	0.07617	0.046915
230.5	0.530788	0.465864	0.455237	0.396749	0.299984		230.5	0.401161	0.233826	0.126949	0.075199	0.045798
231	0.529013	0.463978	0.455594	0.395806	0.299714		231	0.399428	0.233414	0.127338	0.075099	0.045958
231.5	0.526959	0.464585	0.454408	0.394396	0.298331		231.5	0.399027	0.233898	0.125301	0.075317	0.045018
232	0.526429	0.463989	0.453718	0.394041	0.29753		232	0.398045	0.231177	0.126251	0.074213	0.045647
232.5	0.527807	0.462591	0.452739	0.393138	0.297478		232.5	0.397814	0.232437	0.124993	0.073477	0.045614
233	0.524588	0.461453	0.452474	0.392174	0.295513		233	0.396303	0.231524	0.124839	0.073393	0.04516
233.5	0.52537	0.459946	0.452348	0.392174	0.296449		233.5	0.395953	0.229352	0.125155	0.073468	0.045202
234	0.525529	0.459415	0.450252	0.391423	0.294119		234	0.396149	0.228633	0.123118	0.073468	0.044304
234.5	0.525396	0.460477	0.449941	0.391332	0.293828		234.5	0.395278	0.228746	0.12281	0.073502	0.044774
235	0.523144	0.458938	0.448525	0.389008	0.294702		235	0.393955	0.228172	0.122575	0.072264	0.045773
235.5	0.520932	0.459686	0.447178	0.390023	0.293048		235.5	0.394433	0.227123	0.121885	0.071754	0.044279
236	0.520163	0.457095	0.447903	0.388055	0.291863		236	0.391948	0.226412	0.122372	0.070842	0.043347
236.5	0.519991	0.456705	0.446441	0.387213	0.291842		236.5	0.391368	0.226791	0.12225	0.070432	0.043624
237	0.519329	0.45535	0.445325	0.387791	0.290573		237	0.391342	0.224587	0.121844	0.070365	0.043112
237.5	0.520004	0.454873	0.446165	0.386147	0.288255		237.5	0.390147	0.226032	0.120586	0.071511	0.043095
238	0.518203	0.454732	0.445209	0.385255	0.288681		238	0.389165	0.22407	0.120034	0.070608	0.042365
238.5	0.516759	0.454808	0.445094	0.385457	0.288681		238.5	0.389703	0.223165	0.119466	0.069888	0.042029
239	0.516732	0.453637	0.443471	0.382941	0.288192		239	0.388132	0.223828	0.119166	0.069428	0.040971
239.5	0.516229	0.453171	0.441894	0.381998	0.286674		239.5	0.387987	0.222883	0.119174	0.070474	0.042079
240	0.515248	0.451165	0.441617	0.382414	0.285021		240	0.386774	0.220831	0.117876	0.068433	0.041172
240.5	0.514109	0.449604	0.439936	0.382069	0.286216		240.5	0.385246	0.220274	0.117778	0.069085	0.041852
241	0.513698	0.450992	0.439752	0.380933	0.285748		241	0.383871	0.219862	0.11829	0.06947	0.040643
241.5	0.514665	0.449919	0.438221	0.38147	0.284636		241.5	0.384247	0.21979	0.11622	0.067873	0.041013
242	0.512638	0.448488	0.438451	0.378731	0.283627		242	0.384144	0.219628	0.117454	0.067664	0.041214
242.5	0.510254	0.448304	0.436932	0.378569	0.28318		242.5	0.382719	0.218885	0.116228	0.067806	0.041088
243	0.509671	0.447913	0.436057	0.378853	0.281776		243	0.383103	0.217391	0.115254	0.06763	0.040593
243.5	0.510612	0.447393	0.435251	0.377392	0.281641		243.5	0.382445	0.216583	0.114979	0.067061	0.040518
244	0.508677	0.446472	0.435815	0.378112	0.281423		244	0.380917	0.216834	0.114662	0.065891	0.039728
244.5	0.508293	0.445875	0.435895	0.377645	0.280674		244.5	0.380097	0.215679	0.113777	0.067095	0.040098
245	0.50885	0.4449	0.433547	0.375596	0.279301		245	0.379355	0.215073	0.113997	0.066292	0.041004
245.5	0.508611	0.442981	0.433374	0.375079	0.278033		245.5	0.378902	0.215743	0.114321	0.066133	0.039409
246	0.506995	0.444163	0.430254	0.374308	0.277897		246	0.377579	0.214225	0.113112	0.065807	0.038989
246.5	0.505975	0.442949	0.430749	0.372989	0.27745		246.5	0.376972	0.21261	0.112885	0.065297	0.038998
247	0.504743	0.443035	0.431797	0.372218	0.277565		247	0.377425	0.213337	0.113039	0.06446	0.038385
247.5	0.505193	0.442298	0.429529	0.372836	0.276223		247.5	0.376665	0.21173	0.112317	0.063716	0.038956
248	0.505259	0.442374	0.429747	0.372999	0.274788		248	0.375751	0.212796	0.111846	0.0638	0.038813
248.5	0.504239	0.43948	0.428826	0.371852	0.274539		248.5	0.373864	0.212206	0.111319	0.064477	0.03773
249	0.501696	0.439198	0.42817	0.370625	0.275058		249	0.373805	0.210139	0.10942	0.063975	0.038603
249.5	0.502265	0.43819	0.427652	0.368768	0.273457		249.5	0.372823	0.209557	0.10989	0.063214	0.038217
250	0.50057	0.439133	0.425983	0.369986	0.273613		250	0.372157	0.208273	0.110726	0.062896	0.037537
250.5	0.501563	0.439599	0.425821	0.368575	0.273904		250.5	0.371918	0.208063	0.109387	0.063507	0.038016
251	0.498198	0.43768	0.42581	0.368778	0.270785		251	0.370688	0.207417	0.109395	0.062403	0.037881
251.5	0.49849	0.437518	0.423323	0.366617	0.269526		251.5	0.370987	0.207385	0.1083	0.062127	0.037411
252	0.498159	0.435415	0.42315	0.365613	0.269911		252	0.368852	0.206642	0.10916	0.061575	0.036672
252.5	0.497244	0.43587	0.422321	0.366029	0.269818		252.5	0.369185	0.205947	0.107699	0.060864	0.037344
253	0.495443	0.434482	0.422817	0.365603	0.268351		253	0.368545	0.20493	0.107074	0.060772	0.037781
253.5	0.496927	0.433821	0.422172	0.363726	0.267727		253.5	0.367034	0.204663	0.107407	0.061349	0.035891
254	0.497019	0.432965	0.42155	0.364081	0.26727		254	0.367222	0.203557	0.106977	0.060412	0.035514
254.5	0.495681	0.43303	0.419812	0.362519	0.26596		254.5	0.366009	0.203064	0.105987	0.060303	0.035808
255	0.493522	0.431924	0.418004	0.362397	0.266126		255	0.365523	0.202919	0.105208	0.05971	0.036278
255.5	0.49278	0.431274	0.417843	0.362458	0.264525		255.5	0.36507	0.202394	0.105484	0.059593	0.036211
256	0.492356	0.431762	0.418269	0.361047	0.26388		256	0.364771	0.201037	0.103471	0.059434	0.03496
256.5	0.491468	0.429886	0.418269	0.360631	0.264483		256.5	0.364404	0.201465	0.104583	0.059659	0.03585
257	0.490832	0.429214	0.417302	0.359708	0.264306		257	0.363644	0.200762	0.10451	0.059291	0.03548
257.5	0.490965	0.428423	0.415368	0.359282	0.264743		257.5	0.362252	0.200803	0.104031	0.059409	0.035522
258	0.489481	0.43097	0.414044	0.358663	0.26258		258	0.361843	0.20056	0.103447	0.058146	0.034884
258.5	0.489653	0.426472	0.413825	0.356573	0.261394		258.5	0.360408	0.198461	0.103885	0.057217	0.03459
259	0.48915	0.427241	0.413376	0.357395	0.260958		259	0.360169	0.198122	0.102083	0.058497	0.035262
259.5	0.486024	0.426634	0.411891	0.356705	0.259616		259.5	0.359153	0.197007	0.102343	0.057619	0.034414
260	0.487256	0.424488	0.413042	0.354838	0.259533		260	0.358649	0.197467	0.102075	0.057577	0.034313
260.5	0.486527	0.425799	0.41341	0.354382	0.258067		260.5	0.358402	0.197177	0.101913	0.056757	0.034976
261	0.483467	0.424043	0.411315	0.353793	0.258285		261	0.35771	0.196595	0.10132	0.056799	0.033977
261.5	0.486593	0.425041	0.40945	0.35217	0.257505		261.5	0.356463	0.195884	0.100071	0.056849	0.033885
262	0.483467	0.42219	0.409623	0.352038	0.257308		262	0.3552	0.194641	0.100541	0.057175	0.033188
262.5	0.482592	0.422894	0.40831	0.351176	0.256018		262.5	0.355917	0.194221	0.100087	0.056523	0.033641
263	0.481268	0.420358	0.408632	0.351003	0.256185		263	0.355097	0.194019	0.100152	0.056347	0.033767
263.5	0.482076	0.420412	0.407746	0.351572	0.256309		263.5	0.355149	0.194027	0.099105	0.055728	0.033532
264	0.481228	0.420293	0.406986	0.350557	0.25501		264	0.354261	0.193244	0.098748	0.056623	0.033087
264.5	0.481652	0.421138	0.406721	0.349827	0.255238		264.5	0.35304	0.191007	0.09792	0.055268	0.03281
265	0.479757	0.419295	0.405179	0.348984	0.253918		265	0.351904	0.190853	0.097336	0.055068	0.033549
265.5	0.48091	0.417648	0.404891	0.34867	0.253013		265.5	0.352468	0.191168	0.096979	0.055419	0.033474
266	0.479545	0.416141	0.404442	0.347848	0.252722		266	0.35064	0.191063	0.097384	0.054708	0.033356
266.5	0.478128	0.416	0.404039	0.346773	0.252327		266.5	0.35029	0.190587	0.096135	0.054557	0.03192
267	0.477041	0.415816	0.402508	0.34727	0.250933		267	0.348105	0.18994	0.096467	0.055687	0.032013
267.5	0.47528	0.415967	0.402634	0.346184	0.252254		267.5	0.349001	0.189343	0.097555	0.054215	0.031971
268	0.476353	0.415003	0.402001	0.344287	0.250008		268	0.347891	0.188471	0.095088	0.05296	0.032382
268.5	0.475584	0.415859	0.400873	0.3445	0.249696		268.5	0.347661	0.188632	0.095153	0.053755	0.032063
269	0.473637	0.413355	0.399779	0.343303	0.248718		269	0.347165	0.188261	0.095339	0.053537	0.031878
269.5	0.475147	0.412835	0.399065	0.343059	0.247335		269.5	0.344732	0.187283	0.095567	0.053203	0.03171
270	0.474485	0.413203	0.399215	0.342299	0.248313		270	0.345697	0.187356	0.095185	0.053671	0.031593
270.5	0.472511	0.412791	0.397983	0.341893	0.248022		270.5	0.345236	0.187453	0.094268	0.051622	0.03166
271	0.471676	0.410341	0.397557	0.340351	0.246795		271	0.344629	0.186145	0.092929	0.052366	0.031014
271.5	0.471371	0.410526	0.396532	0.339103	0.246129		271.5	0.344126	0.184788	0.093773	0.052207	0.030762
272	0.471173	0.409442	0.39568	0.339438	0.244704		272	0.343221	0.18419	0.093822	0.052015	0.030476
272.5	0.470325	0.409702	0.394817	0.339813	0.245931		272.5	0.342256	0.183027	0.093132	0.051797	0.03014
273	0.470245	0.407924	0.395185	0.338778	0.245703		273	0.341223	0.183593	0.091915	0.051873	0.03051
273.5	0.468404	0.407859	0.394541	0.338129	0.243217		273.5	0.340318	0.183585	0.091955	0.050735	0.029998
274	0.464973	0.407187	0.394011	0.337033	0.242739		274	0.340557	0.182349	0.091996	0.050493	0.030972
274.5	0.46635	0.406016	0.392595	0.336363	0.24223		274.5	0.339617	0.180483	0.090965	0.051379	0.0303
275	0.467516	0.404358	0.393562	0.335958	0.2412		275	0.339233	0.181073	0.0906	0.051028	0.029007
275.5	0.46696	0.40594	0.392019	0.336577	0.240711		275.5	0.338038	0.181558	0.091063	0.051237	0.030451
276	0.46586	0.404455	0.390707	0.33544	0.240316		276	0.338354	0.180282	0.090202	0.050718	0.029586
276.5	0.465556	0.404358	0.391167	0.335227	0.24067		276.5	0.337295	0.179248	0.090779	0.049372	0.028033
277	0.464761	0.403523	0.389786	0.334121	0.240493		277	0.33668	0.180282	0.090673	0.049966	0.029007
277.5	0.46333	0.402276	0.389429	0.332102	0.240004		277.5	0.335681	0.179111	0.09017	0.049062	0.029368
278	0.462588	0.401767	0.388853	0.332549	0.239027		278	0.33534	0.178392	0.089139	0.050041	0.029284
278.5	0.46174	0.401583	0.386424	0.33121	0.239515		278.5	0.334025	0.177568	0.088685	0.048887	0.028814
279	0.461396	0.40116	0.386424	0.330763	0.237051		279	0.334204	0.176567	0.08892	0.048293	0.029553
279.5	0.460389	0.401203	0.386792	0.331382	0.237051		279.5	0.333624	0.176357	0.088725	0.048234	0.028319
280	0.460853	0.398526	0.38586	0.329708	0.236167		280	0.333333	0.176042	0.089228	0.048142	0.02847
280.5	0.459329	0.400043	0.383361	0.329475	0.235356		280.5	0.332266	0.176098	0.087922	0.047707	0.028545
281	0.459435	0.398428	0.383741	0.328267	0.236021		281	0.332112	0.175161	0.08681	0.048109	0.028058
281.5	0.458521	0.397691	0.384202	0.327912	0.233765		281.5	0.330473	0.174693	0.087216	0.048778	0.028587
282	0.458362	0.397919	0.382901	0.327841	0.23389		282	0.330268	0.17441	0.087086	0.047967	0.027899
282.5	0.45758	0.396369	0.381001	0.327648	0.234202		282.5	0.330217	0.173554	0.086664	0.04795	0.027764
283	0.456719	0.396856	0.382475	0.327537	0.233848		283	0.327169	0.1737	0.085909	0.047431	0.027655
283.5	0.455765	0.395295	0.380944	0.325092	0.232496		283.5	0.328134	0.172714	0.086883	0.04759	0.027152
284	0.455514	0.395881	0.379873	0.324808	0.231612		284	0.328168	0.173425	0.085317	0.046511	0.027076
284.5	0.454971	0.393854	0.379804	0.325051	0.23181		284.5	0.326571	0.172496	0.085796	0.046369	0.027773
285	0.453036	0.39303	0.37848	0.322515	0.231373		285	0.328757	0.171358	0.084862	0.046971	0.027899
285.5	0.452864	0.392141	0.377651	0.323103	0.229709		285.5	0.326247	0.171293	0.084708	0.045909	0.027672
286	0.452308	0.391967	0.377754	0.322525	0.229709		286	0.325085	0.170833	0.085138	0.046629	0.026791
286.5	0.451526	0.393919	0.37696	0.32219	0.228358		286.5	0.323745	0.170526	0.083491	0.045985	0.027563
287	0.45048	0.392163	0.37688	0.321257	0.22842		287	0.323984	0.170227	0.083499	0.044144	0.02622
287.5	0.452069	0.390764	0.375579	0.32076	0.228181		287.5	0.323514	0.168991	0.084002	0.045926	0.026388
288	0.450586	0.39007	0.374462	0.319705	0.227973		288	0.323805	0.168192	0.083783	0.04524	0.026648
288.5	0.448108	0.388715	0.374462	0.319664	0.227557		288.5	0.322302	0.168272	0.083304	0.044964	0.026539
289	0.446187	0.389854	0.373483	0.318335	0.227338		289	0.322507	0.168321	0.082655	0.045039	0.02643
289.5	0.447949	0.387122	0.373426	0.31798	0.225758		289.5	0.321491	0.167416	0.081722	0.044345	0.026681
290	0.446505	0.387057	0.37323	0.317148	0.225727		290	0.320432	0.166859	0.081933	0.044755	0.026354
290.5	0.445671	0.385615	0.371388	0.318152	0.225144		290.5	0.319911	0.166463	0.081275	0.044914	0.025002
291	0.445631	0.387458	0.37224	0.317706	0.224292		291	0.319143	0.165712	0.081267	0.043701	0.025498
291.5	0.445419	0.385106	0.36912	0.315758	0.222742		291.5	0.319185	0.165753	0.081706	0.044303	0.026245
292	0.445432	0.385995	0.370697	0.314348	0.222638		292	0.318366	0.164881	0.080853	0.043166	0.025472
292.5	0.44424	0.384	0.368993	0.314865	0.222888		292.5	0.317333	0.164921	0.080034	0.043091	0.026018
293	0.443975	0.383274	0.368809	0.31449	0.221921		293	0.317563	0.164953	0.080172	0.043526	0.025405
293.5	0.441882	0.382255	0.368855	0.313069	0.221505		293.5	0.315454	0.163855	0.078695	0.04325	0.025758
294	0.442438	0.383404	0.367623	0.313445	0.221962		294	0.315915	0.162627	0.079871	0.043659	0.02517
294.5	0.441352	0.382266	0.367324	0.313262	0.221224		294.5	0.315429	0.162579	0.080009	0.042664	0.024566
295	0.440093	0.381637	0.365528	0.312755	0.220465		295	0.315804	0.1627	0.078192	0.042907	0.025338
295.5	0.438411	0.38064	0.366264	0.312045	0.219238		295.5	0.312978	0.161965	0.078946	0.042363	0.024918
296	0.438861	0.379664	0.365228	0.311964	0.218655		296	0.3139	0.160172	0.078208	0.042196	0.025859
296.5	0.439974	0.379631	0.365436	0.310736	0.218791		296.5	0.313473	0.160309	0.078476	0.043224	0.024322
297	0.44004	0.380217	0.364158	0.309539	0.21694		297	0.313098	0.160108	0.07777	0.043383	0.02407
297.5	0.439616	0.37923	0.364112	0.309792	0.217189		297.5	0.312176	0.160842	0.077526	0.042681	0.024112
298	0.437722	0.377799	0.361498	0.307215	0.216856		298	0.311168	0.159704	0.077786	0.041343	0.025447
298.5	0.436106	0.376325	0.362857	0.307378	0.217231		298.5	0.310827	0.158727	0.077989	0.04161	0.02418
299	0.436384	0.37548	0.363006	0.307784	0.215473		299	0.31022	0.158234	0.076357	0.042012	0.024625
299.5	0.434953	0.376325	0.36258	0.305815	0.215525		299.5	0.309563	0.157862	0.076901	0.04074	0.024692
300	0.433787	0.376119	0.360761	0.305136	0.214569		300	0.309571	0.157879	0.076544	0.040565	0.024633
300.5	0.433602	0.375014	0.359886	0.30617	0.215213		300.5	0.308555	0.157717	0.076382	0.041501	0.02423
301	0.433562	0.374233	0.359771	0.304933	0.213789		301	0.307573	0.157442	0.076284	0.040924	0.023718
301.5	0.433098	0.373539	0.357595	0.305582	0.212946		301.5	0.307992	0.157079	0.075854	0.03977	0.023827
302	0.431681	0.373257	0.35786	0.30334	0.212718		302	0.307795	0.156732	0.075708	0.040782	0.02308
302.5	0.431615	0.372314	0.356617	0.304009	0.212135		302.5	0.30584	0.156263	0.074856	0.039394	0.023416
303	0.431164	0.371209	0.357112	0.303817	0.212333		303	0.306088	0.155141	0.075684	0.039779	0.023852
303.5	0.429614	0.372466	0.356536	0.302122	0.211044		303.5	0.304875	0.155213	0.075522	0.04064	0.023869
304	0.430422	0.370472	0.355845	0.301301	0.211896		304	0.304577	0.154382	0.074629	0.039737	0.023852
304.5	0.430184	0.369864	0.354867	0.30128	0.210451		304.5	0.30327	0.154794	0.074637	0.039394	0.023693
305	0.429879	0.369886	0.353669	0.29983	0.21094		305	0.304184	0.153501	0.073972	0.038992	0.022635
305.5	0.427296	0.368304	0.352506	0.300641	0.210014		305.5	0.303338	0.153203	0.073436	0.039461	0.022971
306	0.427693	0.368217	0.353946	0.299535	0.209047		306	0.300905	0.152403	0.07346	0.039319	0.023676
306.5	0.427693	0.367534	0.353635	0.298805	0.208714		306.5	0.301255	0.15212	0.073225	0.037813	0.023365
307	0.424977	0.367274	0.351839	0.29778	0.208028		307	0.301298	0.152492	0.073436	0.039135	0.023222
307.5	0.425971	0.366244	0.351516	0.29705	0.206437		307.5	0.300692	0.1512	0.072584	0.038934	0.0225
308	0.4256	0.365691	0.351321	0.296421	0.207113		308	0.300196	0.151127	0.072495	0.039143	0.022458
308.5	0.42348	0.365604	0.349421	0.295325	0.206946		308.5	0.299949	0.150651	0.072624	0.038507	0.023239
309	0.422593	0.364846	0.349605	0.296613	0.206052		309	0.298992	0.149778	0.072754	0.037361	0.022492
309.5	0.423295	0.364336	0.348914	0.29636	0.204835		309.5	0.297831	0.149003	0.071586	0.038005	0.023038
310	0.422633	0.363621	0.348281	0.296066	0.20548		310	0.296482	0.14889	0.071342	0.037069	0.023055
310.5	0.421626	0.364108	0.345829	0.294919	0.205511		310.5	0.297661	0.149068	0.070652	0.03783	0.022979
311	0.421944	0.361767	0.345161	0.293803	0.204087		311	0.297806	0.148559	0.070344	0.037713	0.021888
311.5	0.420116	0.361789	0.346497	0.293002	0.202891		311.5	0.296115	0.147218	0.070019	0.036843	0.020804
312	0.420354	0.362612	0.345806	0.292971	0.203088		312	0.295705	0.147703	0.069743	0.037754	0.021468
312.5	0.416565	0.361442	0.345449	0.293225	0.201757		312.5	0.29422	0.146879	0.070587	0.036826	0.022777
313	0.418287	0.360011	0.344482	0.291754	0.202569		313	0.294638	0.146911	0.069662	0.03614	0.022618
313.5	0.417175	0.360705	0.342605	0.291571	0.201747		313.5	0.292683	0.147251	0.06993	0.036374	0.021174
314	0.418075	0.359371	0.343918	0.290597	0.200957		314	0.293135	0.14511	0.069232	0.037002	0.021636
314.5	0.417055	0.359686	0.343365	0.289897	0.200218		314.5	0.293024	0.145853	0.069378	0.03711	0.021988
315	0.416287	0.358472	0.34234	0.289055	0.20052		315	0.292529	0.145498	0.068753	0.035914	0.021594
315.5	0.414644	0.357149	0.341419	0.289085	0.200031		315.5	0.291223	0.144803	0.068177	0.035371	0.022391
316	0.415558	0.356813	0.34036	0.287939	0.198669		316	0.291001	0.145078	0.069281	0.035839	0.020956
316.5	0.413598	0.356705	0.340613	0.288456	0.198284		316.5	0.290625	0.14381	0.068494	0.035831	0.021518
317	0.412909	0.358276	0.340556	0.287523	0.198128		317	0.290745	0.143196	0.068088	0.036107	0.020603
317.5	0.413677	0.355317	0.340706	0.287685	0.198305		317.5	0.289327	0.142825	0.067309	0.036174	0.020922
318	0.414008	0.355762	0.338633	0.284906	0.198347		318	0.289746	0.143867	0.067999	0.035722	0.020939
318.5	0.412432	0.355491	0.33876	0.286853	0.197431		318.5	0.289114	0.142421	0.067406	0.036006	0.020351
319	0.411981	0.354049	0.338104	0.286082	0.195113		319	0.287739	0.142171	0.066725	0.035003	0.021065
319.5	0.411186	0.352748	0.337885	0.286103	0.197587		319.5	0.286988	0.142235	0.067544	0.033748	0.020821
320	0.410776	0.352401	0.336169	0.284074	0.194489		320	0.286159	0.141323	0.066416	0.033915	0.021048
320.5	0.410352	0.351523	0.336031	0.283424	0.194322		320.5	0.286825	0.14062	0.066327	0.033447	0.020141
321	0.409067	0.352379	0.334834	0.283648	0.195373		321	0.285425	0.140935	0.065937	0.034417	0.020133
321.5	0.407954	0.351328	0.334074	0.282937	0.193428		321.5	0.284785	0.140354	0.06614	0.034392	0.020192
322	0.408245	0.349919	0.333637	0.281213	0.19349		322	0.284759	0.139707	0.065507	0.033773	0.020712
322.5	0.40798	0.347989	0.333107	0.282958	0.192575		322.5	0.284862	0.138641	0.06653	0.033522	0.020972
323	0.406298	0.348163	0.333015	0.281466	0.192908		323	0.28353	0.137931	0.064858	0.033589	0.01936
323.5	0.405291	0.348054	0.332347	0.280584	0.191515		323.5	0.283333	0.138512	0.065556	0.034459	0.019705
324	0.405954	0.349214	0.332301	0.27963	0.191858		324	0.282471	0.138609	0.064777	0.033832	0.020217
324.5	0.403158	0.349236	0.331783	0.27963	0.191879		324.5	0.281429	0.137503	0.064314	0.034693	0.020443
325	0.404655	0.34684	0.330125	0.278321	0.190953		325	0.281327	0.13701	0.064728	0.033188	0.020569
325.5	0.402933	0.346678	0.329526	0.278473	0.190984		325.5	0.279995	0.136994	0.063876	0.032811	0.020578
326	0.40439	0.345745	0.32986	0.278585	0.190464		326	0.280106	0.136267	0.064395	0.033907	0.02046
326.5	0.401423	0.34671	0.328824	0.27825	0.190797		326.5	0.279226	0.136017	0.063162	0.033121	0.019083
327	0.403158	0.344531	0.328536	0.27612	0.190641		327	0.279448	0.136348	0.063357	0.031983	0.01994
327.5	0.401516	0.345973	0.32788	0.277489	0.18827		327.5	0.278219	0.135492	0.063146	0.033297	0.019663
328	0.402019	0.345008	0.326924	0.275856	0.187958		328	0.278458	0.134983	0.063267	0.032954	0.019428
328.5	0.401012	0.34336	0.327028	0.274486	0.188135		328.5	0.277194	0.134878	0.063673	0.032903	0.018479
329	0.400562	0.342797	0.325508	0.274872	0.187126		329	0.276656	0.134183	0.062505	0.032075	0.019318
329.5	0.398906	0.340748	0.324541	0.274202	0.188041		329.5	0.277117	0.134353	0.061936	0.031933	0.018563
330	0.399475	0.342417	0.324852	0.273746	0.186679		330	0.27611	0.133739	0.062237	0.032042	0.019377
330.5	0.39668	0.341203	0.324357	0.27403	0.186866		330.5	0.275948	0.131963	0.06175	0.031657	0.018571
331	0.39676	0.340249	0.326291	0.274101	0.185348		331	0.275051	0.132431	0.062342	0.03139	0.019428
331.5	0.397846	0.340163	0.323966	0.272203	0.184402		331.5	0.274214	0.132568	0.061571	0.032853	0.019075
332	0.395951	0.339946	0.322227	0.272224	0.184204		332	0.27418	0.132148	0.061425	0.031548	0.019428
332.5	0.396587	0.339556	0.322239	0.272315	0.185462		332.5	0.273241	0.132294	0.061563	0.031072	0.01889
333	0.39517	0.338493	0.321375	0.268876	0.184932		333	0.273062	0.131753	0.060955	0.031548	0.019209
333.5	0.394468	0.337127	0.321041	0.271442	0.182707		333.5	0.272754	0.131825	0.061141	0.031289	0.018017
334	0.394574	0.337561	0.320811	0.26985	0.1833		334	0.2712	0.13122	0.060322	0.031808	0.017824
334.5	0.39415	0.336564	0.319786	0.268389	0.183071		334.5	0.271038	0.13063	0.060857	0.03093	0.018412
335	0.393024	0.336271	0.318647	0.268987	0.182218		335	0.271021	0.130137	0.060005	0.03113	0.017387
335.5	0.392414	0.336054	0.320212	0.269363	0.181979		335.5	0.27068	0.131357	0.060378	0.030988	0.018143
336	0.392534	0.333431	0.319222	0.268115	0.181729		336	0.269749	0.130049	0.059567	0.030503	0.017606
336.5	0.391937	0.335263	0.317426	0.267242	0.181001		336.5	0.268315	0.128926	0.05934	0.030628	0.018026
337	0.390758	0.333767	0.316689	0.26777	0.18017		337	0.269416	0.128716	0.058585	0.030645	0.018563
337.5	0.3915	0.333789	0.316735	0.266177	0.181189		337.5	0.268434	0.128886	0.059469	0.030444	0.018999
338	0.390215	0.333919	0.317207	0.266218	0.180367		338	0.267708	0.12782	0.059056	0.030921	0.017513
338.5	0.390281	0.332509	0.316068	0.266826	0.179358		338.5	0.267871	0.127375	0.058796	0.029633	0.017706
339	0.386983	0.332466	0.314559	0.265142	0.178017		339	0.266607	0.127133	0.059258	0.030461	0.017958
339.5	0.389884	0.33252	0.315411	0.264807	0.17835		339.5	0.266342	0.126972	0.058349	0.03098	0.016405
340	0.387658	0.331003	0.313892	0.263296	0.179275		340	0.26612	0.126107	0.058341	0.029366	0.018546
340.5	0.386559	0.329669	0.313961	0.262301	0.177091		340.5	0.265198	0.126059	0.058187	0.03006	0.017404
341	0.386029	0.330255	0.314053	0.264117	0.177466		341	0.26443	0.12551	0.057692	0.030001	0.017337
341.5	0.386784	0.329615	0.31365	0.262068	0.177507		341.5	0.264583	0.124912	0.057514	0.029583	0.017077
342	0.385247	0.329019	0.312867	0.261064	0.176343		342	0.263465	0.125033	0.058195	0.030528	0.018328
342.5	0.383419	0.327469	0.310633	0.261023	0.175625		342.5	0.263303	0.124492	0.05757	0.029566	0.016665
343	0.384214	0.327805	0.312418	0.260901	0.175386		343	0.263661	0.124201	0.057441	0.029215	0.016707
343.5	0.382531	0.328054	0.310518	0.261165	0.17445		343.5	0.262338	0.123709	0.056191	0.028629	0.017186
344	0.383551	0.327686	0.310277	0.259177	0.175636		344	0.262526	0.124436	0.057067	0.028897	0.017497
344.5	0.381882	0.32852	0.309183	0.258781	0.174232		344.5	0.261492	0.123039	0.056718	0.028939	0.017497
345	0.381578	0.326374	0.309183	0.258659	0.173691		345	0.261185	0.122223	0.057027	0.028529	0.017992
345.5	0.380637	0.326114	0.308434	0.257553	0.174305		345.5	0.260647	0.122982	0.056369	0.028512	0.017807
346	0.380213	0.325962	0.307283	0.258406	0.172672		346	0.260681	0.122239	0.05684	0.028588	0.017564
346.5	0.379007	0.324141	0.306788	0.25733	0.173306		346.5	0.260118	0.122578	0.056808	0.028471	0.017329
347	0.379127	0.323566	0.30726	0.257046	0.172734		347	0.257932	0.120947	0.055712	0.027525	0.017438
347.5	0.378703	0.322634	0.306466	0.256468	0.172474		347.5	0.257573	0.121536	0.055728	0.027944	0.01664
348	0.378345	0.322049	0.305291	0.256234	0.172246		348	0.257497	0.121294	0.055412	0.027191	0.017253
348.5	0.378054	0.322623	0.305522	0.253627	0.171341		348.5	0.257078	0.121084	0.055639	0.027659	0.016388
349	0.377457	0.320986	0.305602	0.254408	0.170488		349	0.258145	0.121189	0.055826	0.027525	0.01659
349.5	0.378358	0.321008	0.30391	0.255443	0.170155		349.5	0.25724	0.120099	0.054714	0.02786	0.017136
350	0.375801	0.320499	0.30391	0.254307	0.168232		350	0.257138	0.119509	0.054535	0.027944	0.016279
350.5	0.374357	0.320423	0.303323	0.252876	0.169854		350.5	0.256054	0.119396	0.054503	0.027216	0.015364
351	0.374636	0.319425	0.30231	0.252815	0.169334		351	0.255131	0.119081	0.055185	0.028069	0.016581
351.5	0.374251	0.3209	0.301665	0.25243	0.168908		351.5	0.254636	0.119517	0.054	0.028337	0.016296
352	0.374278	0.318482	0.29988	0.25314	0.168034		352	0.253868	0.118467	0.053423	0.027551	0.01622
352.5	0.372847	0.318526	0.300191	0.251953	0.167223		352.5	0.253578	0.119033	0.054665	0.027183	0.016472
353	0.371589	0.317593	0.300836	0.25107	0.167483		353	0.253057	0.117587	0.053261	0.027141	0.016229
353.5	0.372105	0.317279	0.300041	0.251304	0.167265		353.5	0.253125	0.117369	0.053456	0.0275	0.015885
354	0.371204	0.316802	0.29912	0.250411	0.167504		354	0.2521	0.117353	0.053253	0.026898	0.016069
354.5	0.37086	0.3169	0.300122	0.248727	0.167171		354.5	0.251938	0.116667	0.052506	0.026672	0.015742
355	0.371231	0.315501	0.297831	0.248808	0.16506		355	0.25105	0.116206	0.05331	0.026363	0.016262
355.5	0.371178	0.315913	0.297232	0.249975	0.166069		355.5	0.252357	0.116804	0.053456	0.026572	0.015431
356	0.370105	0.313973	0.296196	0.248747	0.165195		356	0.251144	0.11615	0.052076	0.026329	0.016556
356.5	0.369522	0.313734	0.297416	0.248057	0.165559		356.5	0.24965	0.115011	0.053237	0.02602	0.01633
357	0.368621	0.313344	0.295724	0.246282	0.163885		357	0.249863	0.115189	0.052709	0.026095	0.01622
357.5	0.368157	0.312943	0.294861	0.247854	0.164166		357.5	0.25	0.114607	0.052466	0.025142	0.015792
358	0.367151	0.312997	0.294953	0.247134	0.163469		358	0.247891	0.114098	0.051735	0.026614	0.015414
358.5	0.367257	0.311285	0.294607	0.246393	0.162003		358.5	0.248173	0.114405	0.052596	0.025995	0.01596
359	0.366528	0.311317	0.29562	0.245673	0.162034		359	0.247413	0.113743	0.050656	0.024983	0.015121
359.5	0.365534	0.310157	0.294676	0.245115	0.162731		359.5	0.247362	0.114236	0.052117	0.025543	0.01528
360	0.365137	0.309192	0.293548	0.24478	0.161909		360	0.246969	0.114324	0.051573	0.025819	0.014273
360.5	0.363746	0.309995	0.293652	0.2441	0.1614		360.5	0.246704	0.11279	0.051646	0.024506	0.01575
361	0.364143	0.311577	0.293709	0.243908	0.160838		361	0.245842	0.112572	0.050656	0.025518	0.015339
361.5	0.36417	0.310417	0.291245	0.244344	0.161691		361.5	0.246363	0.112023	0.050096	0.025669	0.01533
362	0.363958	0.309095	0.291269	0.24339	0.160672		362	0.244962	0.111684	0.051224	0.025225	0.014726
362.5	0.36254	0.307523	0.291199	0.242812	0.15933		362.5	0.244604	0.112725	0.051062	0.02556	0.015129
363	0.362196	0.307534	0.290992	0.241645	0.158998		363	0.243571	0.112273	0.05124	0.024974	0.016296
363.5	0.361931	0.307328	0.290566	0.241331	0.160734		363.5	0.242922	0.111562	0.049447	0.024657	0.015095
364	0.361746	0.308098	0.29014	0.240874	0.159902		364	0.242256	0.111651	0.049836	0.0252	0.014709
364.5	0.361269	0.306656	0.288494	0.241463	0.158571		364.5	0.243622	0.11023	0.049885	0.023904	0.015154
365	0.360699	0.30581	0.289093	0.241107	0.157874		365	0.242205	0.111054	0.049901	0.025292	0.014667
365.5	0.359295	0.305886	0.288264	0.240215	0.157874		365.5	0.242153	0.110723	0.050737	0.025125	0.015213
366	0.360593	0.304813	0.28732	0.23851	0.155056		366	0.242341	0.10935	0.04935	0.024289	0.015112
366.5	0.358195	0.304358	0.286847	0.238388	0.157978		366.5	0.241078	0.10943	0.049471	0.023477	0.014953
367	0.355585	0.303263	0.286099	0.238165	0.157989		367	0.240548	0.109818	0.048619	0.024958	0.01439
367.5	0.356579	0.303946	0.287308	0.238652	0.157074		367.5	0.23978	0.109083	0.048465	0.023151	0.015129
368	0.355599	0.303144	0.285754	0.237039	0.157708		368	0.239438	0.108962	0.048708	0.023536	0.015582
368.5	0.356049	0.302005	0.28451	0.237232	0.156367		368.5	0.239225	0.108905	0.048424	0.024473	0.014399
369	0.355546	0.301691	0.283509	0.236552	0.155649		369	0.238781	0.108114	0.048278	0.024205	0.015037
369.5	0.356632	0.299501	0.283704	0.236654	0.156346		369.5	0.238789	0.107242	0.048441	0.024841	0.013719
370	0.354155	0.300076	0.282645	0.236339	0.154755		370	0.237252	0.107864	0.048327	0.023703	0.014852
370.5	0.352949	0.300564	0.282058	0.236897	0.15438		370.5	0.238388	0.107977	0.047418	0.024615	0.014441
371	0.352883	0.300184	0.28139	0.234249	0.15488		371	0.23668	0.10729	0.04711	0.024121	0.014155
371.5	0.352485	0.300976	0.282737	0.234868	0.153091		371.5	0.235758	0.106886	0.047256	0.022265	0.014776
372	0.353068	0.299805	0.281333	0.235294	0.15385		372	0.235425	0.106426	0.047881	0.023017	0.014239
372.5	0.352922	0.298634	0.280999	0.233894	0.152821		372.5	0.235442	0.106184	0.046639	0.023653	0.013567
373	0.35018	0.298222	0.28177	0.232494	0.152134		373	0.23522	0.105788	0.046939	0.022298	0.014247
373.5	0.351849	0.29806	0.279848	0.232636	0.15229		373.5	0.234213	0.106063	0.047548	0.022909	0.01502
374	0.350511	0.296921	0.277902	0.231469	0.152238		374	0.234162	0.105554	0.046696	0.023201	0.014676
374.5	0.350472	0.295794	0.278915	0.232139	0.152311		374.5	0.233752	0.105465	0.046258	0.023377	0.014256
375	0.350763	0.295816	0.279491	0.231216	0.15229		375	0.232599	0.104496	0.045998	0.023561	0.014365
375.5	0.349438	0.295252	0.278547	0.230323	0.150814		375.5	0.233316	0.104351	0.046379	0.022758	0.013945
376	0.347491	0.295209	0.276785	0.23225	0.150335		376	0.232155	0.103818	0.045779	0.023318	0.014155
376.5	0.346537	0.294309	0.276612	0.229897	0.149171		376.5	0.232223	0.103801	0.046225	0.023352	0.013828
377	0.347835	0.293615	0.275634	0.230617	0.150325		377	0.230866	0.104779	0.046168	0.023059	0.014155
377.5	0.346087	0.294905	0.276785	0.230262	0.149555		377.5	0.230627	0.103753	0.04612	0.023076	0.013441
378	0.345914	0.293442	0.276025	0.230211	0.148339		378	0.230832	0.10242	0.045641	0.022524	0.014508
378.5	0.344775	0.292347	0.275634	0.228831	0.148869		378.5	0.229944	0.102542	0.045032	0.022465	0.014222
379	0.34549	0.293171	0.274068	0.229623	0.148734		379	0.230157	0.10158	0.045268	0.023118	0.013299
379.5	0.344828	0.291881	0.274413	0.227391	0.147902		379.5	0.229372	0.102404	0.044594	0.022248	0.013559
380	0.344696	0.29097	0.274033	0.227959	0.148859		380	0.227758	0.10242	0.044764	0.022432	0.013752
380.5	0.344179	0.289669	0.273078	0.227878	0.1476		380.5	0.229466	0.101435	0.044975	0.02147	0.014113
381	0.343675	0.289257	0.273112	0.226884	0.147642		381	0.228697	0.101169	0.044578	0.021378	0.013509
381.5	0.342536	0.290244	0.272065	0.225778	0.147559		381.5	0.227946	0.101823	0.044659	0.022047	0.013517
382	0.342881	0.290623	0.271224	0.225605	0.146654		382	0.228023	0.100498	0.043872	0.021863	0.013542
382.5	0.342947	0.288455	0.270557	0.225879	0.146467		382.5	0.226358	0.100183	0.043782	0.022139	0.013215
383	0.341132	0.288499	0.271086	0.224256	0.145209		383	0.226383	0.100846	0.044724	0.022022	0.013483
383.5	0.341251	0.287436	0.270568	0.224489	0.146321		383.5	0.225956	0.09999	0.044521	0.022039	0.013861
384	0.339966	0.288228	0.270119	0.224266	0.145344		384	0.226315	0.100175	0.044391	0.021286	0.014214
384.5	0.339767	0.287263	0.269509	0.223911	0.145562		384.5	0.224582	0.100046	0.044602	0.021754	0.013332
385	0.339357	0.286688	0.269417	0.22247	0.143753		385	0.224513	0.099844	0.043214	0.020826	0.013089
385.5	0.339979	0.286537	0.269198	0.222531	0.143826		385.5	0.224761	0.099392	0.044026	0.021679	0.01319
386	0.337807	0.287003	0.268001	0.222277	0.143919		386	0.223207	0.099206	0.043377	0.02188	0.013551
386.5	0.337648	0.284618	0.267886	0.222014	0.143431		386.5	0.222976	0.098649	0.042338	0.022332	0.013458
387	0.337118	0.284293	0.266469	0.220654	0.143722		387	0.222029	0.098043	0.043677	0.020575	0.012694
387.5	0.335687	0.283491	0.266389	0.221537	0.142266		387.5	0.222883	0.097446	0.043442	0.021035	0.013844
388	0.335767	0.283751	0.266458	0.221283	0.142744		388	0.222003	0.097179	0.0428	0.020684	0.013206
388.5	0.335608	0.283306	0.265733	0.221141	0.143576		388.5	0.222208	0.096606	0.042995	0.021378	0.012266
389	0.334786	0.282883	0.265295	0.220228	0.142391		389	0.22196	0.097437	0.043084	0.021453	0.013979
389.5	0.334415	0.282146	0.26503	0.220228	0.140789		389.5	0.220517	0.096549	0.04306	0.021964	0.012585
390	0.333687	0.282407	0.264823	0.218777	0.14029		390	0.221004	0.095903	0.042711	0.021161	0.012652
390.5	0.334071	0.282743	0.262923	0.218067	0.139708		390.5	0.219997	0.095911	0.042492	0.021077	0.012384
391	0.332825	0.281778	0.263741	0.216505	0.139999		391	0.220236	0.09617	0.042508	0.019488	0.012291
391.5	0.333991	0.279837	0.263119	0.218453	0.140685		391.5	0.219493	0.09604	0.042346	0.020425	0.012308
392	0.331368	0.280954	0.26259	0.217631	0.139375		392	0.218383	0.09583	0.042451	0.020324	0.012258
392.5	0.331938	0.279501	0.26092	0.216596	0.138876		392.5	0.218852	0.095192	0.040926	0.02111	0.013173
393	0.330414	0.278103	0.262428	0.21688	0.138824		393	0.217461	0.09537	0.041851	0.021303	0.012308
393.5	0.329593	0.277886	0.259216	0.216434	0.138886		393.5	0.216428	0.096299	0.043011	0.019789	0.013274
394	0.32897	0.278222	0.26115	0.216424	0.137836		394	0.215984	0.095515	0.041494	0.020659	0.013114
394.5	0.328984	0.277377	0.259562	0.215226	0.137274		394.5	0.215898	0.095055	0.041291	0.020926	0.012199
395	0.329023	0.276434	0.259619	0.21478	0.137451		395	0.217358	0.093763	0.041664	0.019672	0.011813
395.5	0.327208	0.277724	0.2597	0.21407	0.136255		395.5	0.215762	0.094054	0.040893	0.020701	0.012577
396	0.328003	0.277019	0.259435	0.213177	0.136879		396	0.215412	0.094215	0.041323	0.020098	0.012174
396.5	0.326626	0.276293	0.258353	0.213552	0.137046		396.5	0.213619	0.093957	0.041242	0.019597	0.012518
397	0.326135	0.275241	0.257743	0.212345	0.135517		397	0.213977	0.092705	0.040966	0.019262	0.011628
397.5	0.328017	0.276043	0.258433	0.212183	0.136307		397.5	0.213832	0.093117	0.040601	0.019262	0.012543
398	0.326771	0.274905	0.257397	0.212629	0.136255		398	0.214225	0.093303	0.04082	0.018969	0.013064
398.5	0.325698	0.274829	0.257766	0.211422	0.136931		398.5	0.212602	0.092802	0.040561	0.019111	0.011913
399	0.326387	0.274623	0.256568	0.210793	0.135569		399	0.212978	0.093165	0.03979	0.018702	0.012308
399.5	0.325897	0.274157	0.254784	0.211594	0.13454		399.5	0.212346	0.09193	0.039725	0.019597	0.011561
400	0.322055	0.274005	0.254289	0.210681	0.1348		400	0.212637	0.091154	0.039855	0.019513	0.01256
400.5	0.321658	0.272499	0.254404	0.209687	0.133624		400.5	0.211791	0.092115	0.040106	0.019806	0.01256
401	0.322651	0.271707	0.254922	0.209454	0.133864		401	0.210613	0.091913	0.03923	0.019195	0.012249
401.5	0.321684	0.271458	0.254692	0.210265	0.134436		401.5	0.211245	0.091453	0.039262	0.019137	0.011712
402	0.322095	0.271263	0.253425	0.208956	0.133115		402	0.210844	0.090831	0.039676	0.019028	0.011712
402.5	0.319604	0.269886	0.253701	0.20851	0.132564		402.5	0.20952	0.090815	0.03936	0.019571	0.011149
403	0.3202	0.270027	0.252021	0.20778	0.132065		403	0.20923	0.091219	0.039416	0.019362	0.012862
403.5	0.32032	0.269507	0.252423	0.207861	0.132231		403.5	0.209264	0.08983	0.039668	0.019245	0.012048
404	0.320479	0.269518	0.251099	0.208723	0.132241		404	0.209238	0.089741	0.0394	0.019019	0.011813
404.5	0.318677	0.268553	0.250627	0.206826	0.131753		404.5	0.208914	0.089281	0.038589	0.017982	0.011746
405	0.317855	0.26903	0.251065	0.206166	0.130401		405	0.208888	0.090258	0.038369	0.018208	0.012056
405.5	0.319525	0.268878	0.249833	0.206948	0.130588		405.5	0.208299	0.08941	0.038085	0.018292	0.011636
406	0.31767	0.266504	0.249787	0.206359	0.130172		406	0.207112	0.088505	0.038483	0.019245	0.011326
406.5	0.317034	0.266808	0.249246	0.205669	0.130474		406.5	0.206045	0.08857	0.038524	0.018551	0.011594
407	0.318067	0.267133	0.248256	0.204888	0.130286		407	0.205063	0.088861	0.037883	0.018258	0.012216
407.5	0.317763	0.267295	0.248613	0.205669	0.130484		407.5	0.206532	0.088037	0.038978	0.017623	0.011208
408	0.315047	0.267111	0.249142	0.204787	0.128321		408	0.205072	0.087892	0.038662	0.019095	0.01094
408.5	0.316199	0.267523	0.248002	0.203955	0.128612		408.5	0.205294	0.088384	0.038094	0.018442	0.011813
409	0.315723	0.264911	0.247127	0.203803	0.128384		409	0.204645	0.087617	0.03828	0.01738	0.01183
409.5	0.315431	0.264412	0.246655	0.204381	0.128716		409.5	0.20397	0.087383	0.037972	0.018359	0.011502
410	0.313444	0.263404	0.246183	0.204259	0.128935		410	0.202544	0.087698	0.037891	0.018693	0.011687
410.5	0.313457	0.264304	0.245562	0.202849	0.129278		410.5	0.203629	0.086607	0.037834	0.017397	0.011401
411	0.314636	0.261821	0.245251	0.203387	0.127624		411	0.203842	0.086115	0.036771	0.017915	0.01104
411.5	0.313232	0.26413	0.246149	0.201276	0.127593		411.5	0.203142	0.087019	0.037469	0.018451	0.010553
412	0.311364	0.261962	0.245401	0.20011	0.127583		412	0.202587	0.086672	0.036479	0.017631	0.011687
412.5	0.311218	0.262244	0.244664	0.201185	0.125867		412.5	0.200615	0.086204	0.037014	0.017363	0.011015
413	0.310808	0.260867	0.243501	0.202342	0.126751		413	0.201366	0.085824	0.037501	0.017882	0.01078
413.5	0.311536	0.261702	0.243109	0.199897	0.126148		413.5	0.202083	0.083983	0.036787	0.017313	0.011939
414	0.311616	0.259935	0.242488	0.199734	0.126106		414	0.200897	0.084677	0.037136	0.017179	0.011116
414.5	0.309483	0.260033	0.243017	0.19946	0.126085		414.5	0.201084	0.085695	0.036584	0.017539	0.011124
415	0.309337	0.259621	0.24167	0.199937	0.126085		415	0.200675	0.086341	0.036641	0.018225	0.011746
415.5	0.309337	0.26065	0.242292	0.199612	0.125409		415.5	0.200248	0.085291	0.036625	0.017414	0.011628
416	0.306846	0.258873	0.240507	0.198527	0.12411		416	0.19959	0.084613	0.036714	0.017748	0.010965
416.5	0.307721	0.258862	0.241348	0.19738	0.12463		416.5	0.198267	0.083417	0.035984	0.017748	0.010889
417	0.308569	0.258526	0.23954	0.197431	0.124806		417	0.198625	0.084023	0.035635	0.01728	0.010679
417.5	0.308105	0.257702	0.241083	0.197624	0.124505		417.5	0.198677	0.083272	0.034726	0.017623	0.01193
418	0.306608	0.256271	0.2403	0.196741	0.124172		418	0.197328	0.083377	0.035862	0.017255	0.011385
418.5	0.308317	0.256986	0.238378	0.196305	0.123454		418.5	0.197857	0.083611	0.035943	0.01687	0.010688
419	0.306582	0.256434	0.239748	0.196001	0.123309		419	0.196721	0.082949	0.036065	0.016912	0.011771
419.5	0.305045	0.256119	0.237675	0.195392	0.121759		419.5	0.196448	0.082949	0.035805	0.017037	0.011267
420	0.304144	0.25587	0.237779	0.196264	0.12282		420	0.196747	0.083086	0.03501	0.017338	0.011065
420.5	0.305098	0.256347	0.237077	0.194631	0.121759		420.5	0.196858	0.081867	0.035415	0.016845	0.011754
421	0.303535	0.255274	0.237295	0.195301	0.120428		421	0.196098	0.082917	0.035123	0.016678	0.010663
421.5	0.303667	0.254862	0.236869	0.194641	0.122404		421.5	0.1955	0.08194	0.035229	0.01723	0.009924
422	0.30474	0.25536	0.234705	0.194114	0.12048		422	0.194271	0.081503	0.03544	0.01646	0.010041
422.5	0.30266	0.253724	0.235407	0.193809	0.120772		422.5	0.194817	0.08139	0.036755	0.015975	0.010016
423	0.302104	0.252358	0.235131	0.193373	0.121021		423	0.194331	0.081293	0.035846	0.016243	0.011359
423.5	0.302501	0.251523	0.234313	0.193728	0.121198		423.5	0.193622	0.081124	0.034474	0.016335	0.010352
424	0.302488	0.251946	0.234049	0.192511	0.119555		424	0.192811	0.08076	0.035854	0.015916	0.010856
424.5	0.299706	0.252423	0.234383	0.191242	0.119732		424.5	0.192418	0.080664	0.03458	0.016293	0.010637
425	0.300779	0.25161	0.233818	0.192987	0.119305		425	0.191581	0.08097	0.034474	0.017112	0.010167
425.5	0.300739	0.251079	0.233496	0.192632	0.119212		425.5	0.192375	0.080922	0.034726	0.016268	0.010713
426	0.30013	0.25123	0.23307	0.191821	0.11968		426	0.192384	0.079347	0.034661	0.016862	0.010369
426.5	0.29862	0.251436	0.233162	0.190066	0.11916		426.5	0.191778	0.080486	0.03333	0.016427	0.010293
427	0.297838	0.249225	0.231274	0.189528	0.119326		427	0.190932	0.079452	0.033606	0.017062	0.010587
427.5	0.298567	0.249322	0.233128	0.190421	0.118047		427.5	0.189677	0.079799	0.033468	0.016719	0.010646
428	0.297136	0.249333	0.232552	0.188858	0.118234		428	0.189711	0.079371	0.034076	0.016209	0.011603
428.5	0.296884	0.248585	0.230906	0.188706	0.118421		428.5	0.189848	0.078604	0.033111	0.016694	0.011141
429	0.296897	0.247859	0.230929	0.188534	0.118359		429	0.189558	0.078233	0.033549	0.016577	0.010268
429.5	0.296699	0.249355	0.23094	0.18688	0.11707		429.5	0.189942	0.079097	0.034239	0.015891	0.010385
430	0.296116	0.246547	0.230641	0.188026	0.11709		430	0.188704	0.078015	0.033168	0.015406	0.01104
430.5	0.293864	0.248228	0.229777	0.188239	0.116414		430.5	0.188712	0.078071	0.034352	0.015958	0.011754
431	0.294963	0.24697	0.227647	0.186981	0.116311		431	0.188371	0.077546	0.032437	0.015582	0.010755
431.5	0.293996	0.247024	0.2282	0.186697	0.115562		431.5	0.187372	0.078023	0.033922	0.015231	0.010016
432	0.296063	0.246959	0.227452	0.186809	0.115645		432	0.187739	0.078257	0.033573	0.015381	0.010268
432.5	0.292685	0.245897	0.228626	0.185622	0.116404		432.5	0.187534	0.077352	0.033062	0.015364	0.010033
433	0.292181	0.243946	0.227037	0.186667	0.117142		433	0.18645	0.077465	0.033581	0.015298	0.009999
433.5	0.293254	0.243827	0.226197	0.186586	0.115718		433.5	0.186936	0.077021	0.033273	0.01503	0.009857
434	0.293214	0.244509	0.225932	0.184962	0.114376		434	0.18592	0.07648	0.033362	0.015289	0.009815
434.5	0.291691	0.243285	0.225794	0.184526	0.114823		434.5	0.186066	0.076868	0.0332	0.016226	0.010377
435	0.292592	0.24348	0.226013	0.184232	0.114366		435	0.184119	0.076294	0.03195	0.015448	0.010201
435.5	0.291214	0.241528	0.224573	0.184141	0.11447		435.5	0.184998	0.076787	0.031707	0.015649	0.010268
436	0.290167	0.242428	0.223572	0.184333	0.114366		436	0.184887	0.076432	0.03182	0.015891	0.009445
436.5	0.288975	0.242797	0.22455	0.182801	0.113794		436.5	0.183974	0.07539	0.032218	0.015356	0.010411
437	0.290764	0.242461	0.223733	0.183512	0.112785		437	0.182633	0.075374	0.032283	0.015691	0.010276
437.5	0.289028	0.242157	0.22196	0.182974	0.113316		437.5	0.183299	0.074728	0.031228	0.015766	0.009747
438	0.288445	0.241095	0.222501	0.182852	0.113316		438	0.182915	0.074913	0.032218	0.015289	0.010285
438.5	0.28875	0.240304	0.223457	0.183055	0.112525		438.5	0.18312	0.075382	0.031983	0.014553	0.01052
439	0.287028	0.240553	0.223434	0.181482	0.112297		439	0.182326	0.074203	0.032153	0.014436	0.009722
439.5	0.285994	0.239425	0.222064	0.181543	0.112931		439.5	0.181557	0.074227	0.031017	0.015314	0.008799
440	0.285835	0.238363	0.221707	0.179656	0.111891		440	0.181805	0.074356	0.031707	0.01549	0.009143
440.5	0.284842	0.239122	0.220889	0.180316	0.111205		440.5	0.180832	0.074711	0.031812	0.015791	0.009428
441	0.285676	0.238179	0.2212	0.180559	0.112203		441	0.180507	0.074162	0.032031	0.015373	0.009579
441.5	0.286233	0.238721	0.219577	0.180235	0.111766		441.5	0.180738	0.075317	0.032486	0.015323	0.010469
442	0.283835	0.237789	0.2193	0.179271	0.11055		442	0.179969	0.073928	0.030197	0.015666	0.009882
442.5	0.284047	0.23678	0.219001	0.17989	0.110581		442.5	0.180524	0.072999	0.0307	0.014854	0.009496
443	0.284444	0.235306	0.219853	0.17993	0.110248		443	0.180567	0.073234	0.031958	0.01513	0.010209
443.5	0.284564	0.235805	0.218736	0.179808	0.110404		443.5	0.178928	0.073387	0.031666	0.014804	0.00832
444	0.283279	0.236336	0.218702	0.179342	0.109541		444	0.179431	0.072854	0.031358	0.014411	0.009
444.5	0.282007	0.23536	0.217976	0.177384	0.109458		444.5	0.178176	0.073298	0.03182	0.014319	0.008967
445	0.281954	0.235458	0.217654	0.177485	0.108771		445	0.177826	0.071941	0.030441	0.014511	0.008505
445.5	0.282192	0.235556	0.218656	0.178632	0.108262		445.5	0.17751	0.072991	0.030384	0.01508	0.008992
446	0.280245	0.235783	0.21694	0.176907	0.108376		446	0.177707	0.071853	0.031098	0.014018	0.008723
446.5	0.280907	0.234645	0.217527	0.176968	0.108491		446.5	0.176673	0.072305	0.029848	0.014779	0.009546
447	0.280841	0.235274	0.216192	0.176552	0.108116		447	0.176059	0.071756	0.031139	0.01467	0.009009
447.5	0.280536	0.235154	0.215812	0.176602	0.107742		447.5	0.176648	0.071554	0.030498	0.014294	0.009579
448	0.279172	0.232705	0.215628	0.175284	0.108262		448	0.175418	0.071739	0.031269	0.014737	0.009756
448.5	0.279529	0.231425	0.215156	0.175081	0.108428		448.5	0.176392	0.070617	0.030644	0.014219	0.009613
449	0.279808	0.231501	0.214143	0.174381	0.107721		449	0.175077	0.070027	0.029524	0.014277	0.010024
449.5	0.278814	0.231653	0.214304	0.174817	0.107409		449.5	0.174667	0.070197	0.030067	0.014285	0.00937
450	0.279702	0.232379	0.213291	0.174441	0.106556		450	0.173489	0.070778	0.030181	0.014469	0.009134
450.5	0.277158	0.231252	0.213337	0.173944	0.105901		450.5	0.174103	0.07094	0.030782	0.014796	0.009437
451	0.277503	0.23058	0.214281	0.173539	0.105371		451	0.173395	0.070035	0.029873	0.014679	0.009176
451.5	0.27741	0.230016	0.21184	0.172747	0.106764		451.5	0.174223	0.069446	0.030067	0.014461	0.009663
452	0.277118	0.229995	0.211621	0.173397	0.106088		452	0.173036	0.069979	0.029783	0.014076	0.010243
452.5	0.277132	0.2289	0.211898	0.173853	0.104716		452.5	0.172874	0.069979	0.030335	0.015122	0.009294
453	0.275277	0.2289	0.212162	0.173021	0.105246		453	0.172729	0.069632	0.029191	0.014386	0.009621
453.5	0.27435	0.228379	0.211092	0.172463	0.105402		453.5	0.173019	0.069414	0.028639	0.013876	0.010301
454	0.27586	0.228954	0.210332	0.172169	0.104653		454	0.172618	0.06943	0.028915	0.014118	0.009487
454.5	0.275356	0.227729	0.209319	0.17154	0.105953		454.5	0.171773	0.06901	0.028801	0.012981	0.010335
455	0.274363	0.22722	0.211403	0.172281	0.103811		455	0.171192	0.07048	0.029694	0.01421	0.009764
455.5	0.272614	0.227675	0.210217	0.170079	0.103915		455.5	0.170611	0.067976	0.02881	0.014369	0.008337
456	0.272084	0.225355	0.209123	0.169724	0.103031		456	0.170765	0.068121	0.029118	0.01314	0.009731
456.5	0.271859	0.226645	0.208294	0.17016	0.10431		456.5	0.170748	0.067726	0.028493	0.013809	0.00921
457	0.271409	0.225908	0.209088	0.170109	0.102179		457	0.170099	0.068905	0.028704	0.013876	0.00989
457.5	0.270362	0.225995	0.207603	0.171276	0.103614		457.5	0.170321	0.068436	0.028631	0.012822	0.008648
458	0.271382	0.225724	0.207983	0.168659	0.102033		458	0.168852	0.066991	0.028388	0.0138	0.009714
458.5	0.272641	0.224585	0.207661	0.16875	0.102511		458.5	0.169954	0.066797	0.028079	0.014043	0.009663
459	0.270203	0.224846	0.207143	0.169146	0.101492		459	0.168391	0.066312	0.029288	0.012964	0.009563
459.5	0.269938	0.223892	0.205255	0.168801	0.101024		459.5	0.169254	0.067588	0.028063	0.013491	0.008622
460	0.270335	0.221713	0.204069	0.167532	0.101575		460	0.168041	0.06733	0.029029	0.012989	0.009781
460.5	0.269408	0.222136	0.206003	0.167654	0.100816		460.5	0.168511	0.067177	0.027519	0.01375	0.009126
461	0.268362	0.221973	0.205669	0.167056	0.10143		461	0.167606	0.066595	0.029126	0.012947	0.008706
461.5	0.267898	0.223209	0.204092	0.16664	0.100452		461.5	0.166906	0.067968	0.028477	0.012738	0.00921
462	0.267182	0.220607	0.20499	0.167066	0.100629		462	0.167188	0.06645	0.027811	0.013541	0.010075
462.5	0.267527	0.221539	0.205105	0.166406	0.100224		462.5	0.166564	0.066482	0.027146	0.012922	0.008194
463	0.265685	0.222244	0.203343	0.165524	0.100473		463	0.165318	0.066361	0.027462	0.01273	0.008706
463.5	0.267196	0.220401	0.204103	0.16664	0.10038		463.5	0.165557	0.065981	0.027657	0.013056	0.00858
464	0.265752	0.221084	0.203424	0.16524	0.10012		464	0.165471	0.065198	0.027819	0.013558	0.008513
464.5	0.264533	0.220542	0.204126	0.164763	0.100088		464.5	0.164182	0.065787	0.027787	0.012914	0.009378
465	0.264559	0.220282	0.202791	0.16528	0.098965		465	0.165369	0.065804	0.027008	0.013198	0.008857
465.5	0.264361	0.219621	0.202181	0.165311	0.099267		465.5	0.164182	0.064277	0.026878	0.014135	0.009202
466	0.264361	0.220076	0.201835	0.163099	0.098653		466	0.164592	0.064746	0.02773	0.012897	0.009185
466.5	0.264241	0.219111	0.201651	0.163139	0.098185		466.5	0.164267	0.066086	0.028014	0.012671	0.009529
467	0.26391	0.218201	0.202457	0.163373	0.098965		467	0.164541	0.064503	0.027446	0.012989	0.008177
467.5	0.262585	0.217593	0.200097	0.163484	0.098872		467.5	0.163021	0.064536	0.027032	0.013365	0.009151
468	0.262864	0.217637	0.200005	0.162906	0.099236		468	0.163217	0.063195	0.026878	0.013692	0.009403
468.5	0.262784	0.217279	0.200764	0.16247	0.097541		468.5	0.162141	0.064398	0.027349	0.012646	0.008135
469	0.263751	0.217388	0.199694	0.162023	0.097302		469	0.163303	0.06393	0.026789	0.01324	0.009025
469.5	0.262069	0.215436	0.199014	0.161851	0.098664		469.5	0.162269	0.064576	0.027235	0.012813	0.00879
470	0.260943	0.216477	0.19974	0.162723	0.097146		470	0.162082	0.064681	0.026375	0.011383	0.009353
470.5	0.259578	0.217117	0.198312	0.161425	0.097354		470.5	0.161475	0.06376	0.026756	0.012471	0.008773
471	0.261035	0.216466	0.198381	0.160329	0.098258		471	0.161416	0.063639	0.026107	0.01324	0.010058
471.5	0.260373	0.21536	0.197955	0.159386	0.097312		471.5	0.161279	0.064269	0.02648	0.012153	0.008278
472	0.260161	0.215209	0.198197	0.160441	0.095139		472	0.160425	0.063244	0.025823	0.011868	0.00832
472.5	0.259817	0.214255	0.19761	0.160613	0.095139		472.5	0.161305	0.062605	0.026359	0.01242	0.007531
473	0.259764	0.213778	0.197391	0.159822	0.096282		473	0.159503	0.062234	0.026278	0.012738	0.008975
473.5	0.256505	0.214753	0.196908	0.15968	0.09465		473.5	0.159665	0.062299	0.0267	0.012479	0.009437
474	0.256902	0.213257	0.196597	0.159639	0.094931		474	0.158376	0.063066	0.02631	0.012546	0.008664
474.5	0.258359	0.212867	0.196873	0.158787	0.095835		474.5	0.157838	0.062129	0.026107	0.012412	0.00848
475	0.257949	0.214244	0.196516	0.158746	0.095243		475	0.158274	0.062194	0.026294	0.01268	0.008883
475.5	0.256399	0.211003	0.196562	0.158604	0.094119		475.5	0.157881	0.062323	0.026911	0.012136	0.007892
476	0.255326	0.210233	0.193972	0.157407	0.095565		476	0.158274	0.06221	0.025677	0.012128	0.009428
476.5	0.256664	0.209908	0.194421	0.157651	0.094463		476.5	0.157326	0.061798	0.02532	0.012387	0.008589
477	0.254359	0.209984	0.193166	0.15624	0.093308		477	0.157198	0.061346	0.025125	0.011776	0.007724
477.5	0.255736	0.210482	0.191347	0.15622	0.094712		477.5	0.156532	0.061927	0.025669	0.012621	0.008874
478	0.25416	0.211014	0.193327	0.156098	0.092986		478	0.15701	0.060861	0.025636	0.012337	0.008228
478.5	0.255458	0.210428	0.19388	0.156342	0.093496		478.5	0.156404	0.061386	0.025247	0.011818	0.007581
479	0.2542	0.209366	0.193097	0.155896	0.092643		479	0.156984	0.060845	0.025685	0.012362	0.007648
479.5	0.253656	0.209041	0.192878	0.156027	0.09284		479.5	0.156054	0.061265	0.025645	0.01089	0.008606
480	0.252014	0.209648	0.191888	0.155672	0.09205		480	0.155575	0.060118	0.025636	0.011676	0.008765
480.5	0.252265	0.208282	0.191646	0.155023	0.092716		480.5	0.155686	0.060094	0.025645	0.011383	0.008891
481	0.252345	0.209344	0.190598	0.155246	0.092019		481	0.153979	0.059666	0.024833	0.012437	0.007472
481.5	0.250517	0.207274	0.191899	0.154181	0.092976		481.5	0.154252	0.060934	0.024484	0.012688	0.00869
482	0.251113	0.207783	0.191899	0.154577	0.092372		482	0.154747	0.059763	0.024508	0.012897	0.008513
482.5	0.251179	0.207718	0.193028	0.153856	0.09258		482.5	0.153979	0.059214	0.024573	0.011082	0.007573
483	0.250437	0.207729	0.190172	0.153856	0.092185		483	0.153467	0.059076	0.024468	0.012521	0.008438
483.5	0.251457	0.206428	0.190898	0.153014	0.092071		483.5	0.152638	0.058737	0.024865	0.012153	0.00848
484	0.251934	0.206612	0.189274	0.153004	0.091364		484	0.152818	0.060328	0.025758	0.011567	0.007833
484.5	0.249616	0.206396	0.188411	0.15202	0.091738		484.5	0.153654	0.059383	0.025612	0.012596	0.009689
485	0.247907	0.205268	0.188929	0.153065	0.090657		485	0.152169	0.059432	0.025287	0.011994	0.008908
485.5	0.247576	0.205995	0.188422	0.15203	0.08996		485.5	0.152425	0.058931	0.025523	0.011793	0.009059
486	0.248596	0.204477	0.187547	0.152142	0.090334		486	0.151733	0.058422	0.025969	0.011266	0.007413
486.5	0.247708	0.204531	0.186799	0.150884	0.090813		486.5	0.151742	0.058374	0.023648	0.01089	0.007926
487	0.24633	0.201962	0.186626	0.151188	0.090501		487	0.152348	0.057929	0.024492	0.010789	0.008186
487.5	0.247165	0.20516	0.185993	0.150539	0.08917		487.5	0.150342	0.057752	0.025044	0.011308	0.008765
488	0.245363	0.204629	0.186005	0.150711	0.088878		488	0.150512	0.058987	0.024095	0.01135	0.008429
488.5	0.244767	0.204553	0.186891	0.150001	0.089742		488.5	0.150102	0.058398	0.024906	0.010555	0.008035
489	0.246026	0.202493	0.186212	0.149068	0.089388		489	0.149351	0.057921	0.024038	0.011383	0.008648
489.5	0.244462	0.202992	0.186431	0.149656	0.089305		489.5	0.150256	0.056823	0.025182	0.013089	0.008454
490	0.243217	0.201951	0.18513	0.150214	0.08969		490	0.148899	0.056718	0.024484	0.010915	0.00837
490.5	0.244555	0.20077	0.18536	0.148286	0.08945		490.5	0.149454	0.057316	0.022918	0.011274	0.009051
491	0.245575	0.201648	0.183748	0.14853	0.087797		491	0.149052	0.057623	0.025231	0.012362	0.007758
491.5	0.243959	0.200141	0.184024	0.148276	0.088369		491.5	0.147959	0.05776	0.023981	0.011274	0.007464
492	0.244343	0.200423	0.184186	0.147779	0.087662		492	0.148591	0.05734	0.024265	0.011776	0.007783
492.5	0.243694	0.199534	0.184289	0.148388	0.088525		492.5	0.148531	0.056573	0.023762	0.011626	0.007481
493	0.241985	0.199415	0.184439	0.148408	0.087641		493	0.148309	0.057905	0.023721	0.010865	0.007783
493.5	0.241468	0.198352	0.183483	0.147252	0.087256		493.5	0.146636	0.057041	0.024322	0.011693	0.008211
494	0.242952	0.199241	0.181929	0.147191	0.087766		494	0.146943	0.056726	0.023445	0.010664	0.007615
494.5	0.241707	0.19871	0.180686	0.146734	0.086268		494.5	0.146371	0.056662	0.023867	0.010681	0.007623
495	0.241561	0.199339	0.180076	0.145212	0.086601		495	0.145791	0.056476	0.022739	0.01155	0.008177
495.5	0.241773	0.200293	0.181538	0.145791	0.085384		495.5	0.145543	0.055797	0.023445	0.011366	0.008194
496	0.239521	0.197767	0.18308	0.146217	0.085946		496	0.145944	0.056048	0.023023	0.011818	0.009311
496.5	0.240395	0.197669	0.181618	0.145294	0.085021		496.5	0.145313	0.05524	0.023405	0.011835	0.007623
497	0.238064	0.198602	0.180582	0.144878	0.085863		497	0.144561	0.055515	0.023104	0.011952	0.00717
497.5	0.239534	0.197973	0.179903	0.144888	0.08656		497.5	0.144612	0.05566	0.022999	0.0114	0.007766
498	0.239759	0.196878	0.179419	0.144614	0.085811		498	0.144629	0.056048	0.023023	0.011082	0.00832
498.5	0.238514	0.19716	0.177497	0.145557	0.084937		498.5	0.143963	0.054651	0.023535	0.010965	0.007934
499	0.238408	0.197247	0.179074	0.144117	0.086029		499	0.144527	0.055773	0.023267	0.011249	0.007615
499.5	0.236077	0.195762	0.178625	0.144431	0.08554		499.5	0.144288	0.055369	0.022966	0.011124	0.007556
500	0.234593	0.195089	0.177773	0.143041	0.084854		500	0.144425	0.054142	0.022074	0.011919	0.007581
[truncated: 1,000 more rows]

## Sheet: Data from each fit
E525K	15HP HMM	N=1									E525K
KCl	A1	K1	A2	K2		Atotal	A1	A2			KCl	K1	K1 Error	K2	K2 Error		A1	A2	Stdev 1	Stdev 2
20	0.03375	0.02998	0.753	0.0024		0.78675	0.042898	0.957102			20	0.02718	0.00761632	0.00223333	0.000208167		0.0495465	0.950454	0.0068389	0.0068389
50	0.04597	0.01896	0.755	0.0026		0.80097	0.0573929	0.942607			50	0.0190533	0.00170192	0.00261	1.73205e-05		0.0576896	0.94231	0.00739569	0.00739569
75	0.0587	0.01465	0.7695	0.00298		0.8282	0.0708766	0.929123			75	0.01575	0.00577906	0.00296	5.2915e-05		0.0816089	0.918391	0.0156014	0.0156014
100	0.0693	0.0136	0.768	0.00315		0.8373	0.082766	0.917234			100	0.0137	0.00255147	0.00325667	0.00012897		0.103941	0.896059	0.0234615	0.0234615
150	0.179	0.01207	0.683	0.00405		0.862	0.207657	0.792343			150	0.0130567	0.00185813	0.00418333	0.000125831		0.205851	0.794149	0.0324626	0.0324626
WT	15HP HMM	N=1									WT
KCl	A1	K1	A2	K2		Atotal	A1	A2			KCl	K1	K1 Error	K2	K2 Error		A1	A2	Stdev 1	Stdev 2
20	0.09518	0.0147	0.8576	0.00309		0.95278	0.0998971	0.900103			20	0.0142	0.00160935	0.00326333	0.000158219		0.109219	0.890781	0.00842749	0.00842749
50	0.453	0.0125	0.5362	0.0055		0.9892	0.457946	0.542054			50	0.01258	0.00118203	0.00543333	0.000503322		0.425536	0.574464	0.051569	0.051569
75	0.5165	0.0159	0.499	0.00767		1.0155	0.508616	0.491384			75	0.01502	0.00157645	0.00691333	0.000933613		0.593881	0.406119	0.0756323	0.0756323
100	0.875	0.0165	0.144	0.00597		1.019	0.858685	0.141315			100	0.0156967	0.00096241	0.00582333	0.000372335		0.847245	0.152755	0.0326209	0.0326209
150	0.8746	0.0184	0.1452	0.0074		1.0198	0.857619	0.142381			150	0.01805	0.00102103	0.00705333	0.000835783		0.869692	0.130308	0.0167146	0.0167146
E525K	15HP HMM	N=2
KCl	A1	K1	A2	K2		Atotal	A1	A2
20	0.05	0.033	0.834	0.002		0.884	0.0565611	0.943439
50	0.0605	0.0174	0.867	0.0026		0.9275	0.0652291	0.934771
75	0.067	0.022	0.833	0.003		0.9	0.0744444	0.925556
100	0.094	0.0163	0.847	0.0034		0.941	0.0998937	0.900106
150	0.162	0.0152	0.777	0.0042		0.939	0.172524	0.827476
WT	15HP HMM	N=2
KCl	A1	K1	A2	K2		Atotal	A1	A2
20	0.106	0.0155	0.845	0.0034		0.951	0.111462	0.888538
50	0.453	0.0138	0.5479	0.0059		1.0009	0.452593	0.547407
75	0.647	0.01596	0.344	0.0072		0.991	0.652876	0.347124
100	0.8151	0.01596	0.119	0.0054		0.9341	0.872605	0.127395
150	0.867	0.01885	0.138	0.00766		1.005	0.862687	0.137313
E525K	15HP HMM	N=3
KCl	A1	K1	A2	K2		Atotal	A1	A2
20	0.042	0.01856	0.812	0.0023		0.854	0.0491803	0.95082
50	0.048	0.0208	0.9035	0.00263		0.9515	0.0504467	0.949553
75	0.0926	0.0106	0.838	0.0029		0.9306	0.0995057	0.900494
100	0.128	0.0112	0.863	0.00322		0.991	0.129162	0.870838
150	0.235	0.0119	0.755	0.0043		0.99	0.237374	0.762626
WT	15HP HMM	N=3
KCl	A1	K1	A2	K2		Atotal	A1	A2
20	0.1395	0.0124	1.06	0.0033		1.1995	0.116298	0.883702
50	0.4653	0.01144	0.80577	0.0049		1.27107	0.36607	0.63393
75	0.7608	0.0132	0.466	0.00587		1.2268	0.62015	0.37985
100	0.987	0.01463	0.23085	0.0061		1.21785	0.810445	0.189555
150	1.0699	0.0169	0.1339	0.0061		1.2038	0.888769	0.111231

## Sheet: Summary and Stats HMM
	Summary of single mantATP turnover measurements for WT and E525K M2β 15HPZ.GFP (N=3, ±SD)
	Conditions	DRX Rate	DRX Fraction	SRX Rate	SRX Fraction
	WT
	20 mM KCl	0.014±0.002	0.11±0.01	0.0033±0.0001	0.89±0.01
	50 mM KCl	0.013±0.001	0.43±0.05	0.0054±0.0005	0.57±0.05
	75 mM KCl	0.015±0.002	0.59±0.08	0.0069±0.0009	0.41±0.08
	100 mM KCl	0.016±0.001	0.85±0.03	0.0058±0.0004	0.15±0.03
	150 mM KCl	0.018±0.001	0.87±0.02	0.0071±0.0008	0.13±0.02
	E525K
	20 mM KCl	0.027±0.008	0.05±0.01	0.0022±0.0002	0.95±0.01
	50 mM KCl	0.019±0.002	0.06±0.01	0.0026±0.0001	0.94±0.01
	75 mM KCl	0.016±0.006	0.08±0.02	0.0030±0.0001	0.92±0.02
	100 mM KCl	0.014±0.003	0.10±0.02	0.0033±0.0001	0.90±0.02
	150 mM KCl	0.013±0.002	0.21±0.03	0.0042±0.0001	0.79±0.03
		P values
		WT vs E525K
	KCl	DRX Rate	SRX Rate	SRX Fraction
	20	0.0524	0.01	0.0018
	50	0.0097	0.0007	0.0002
	75	0.7978	0.0017	0.0004
	100	0.3349	0.0005	0.0001
	150	0.0936	0.0034	0.0001
