# Supplementary material for: Dilated cardiomyopathy mutation E525K in human beta-cardiac myosin stabilizes the interacting-heads motif and super-relaxed state of myosin
Source: eLife journal article supplement (doi:10.7554/elife.77415), 2022-11-08
Supplement: fig3-figsupp2-data1 [file Figure 3-figure supplement2-source data1.xlsx]

## Sheet: Sheet1
E525K	HMM	Traces						E525K	HMM	Residuals
Time	20 KCl	50 KCl	75 KCl	100 KCl	150 KCl			Time	20 KCl	50 KCl	75 KCl	100 KCl	150 KCl
0.001	1	1	1	1	1			0.001	0	0	0	0	0
0.002	1.03629	1.0122	1.05812	1.05588	1.06791			0.002	0.046764	-0.01429	0.073425	0.04283	0.064086
0.003	1.03525	1.02062	1.05306	1.05528	1.07509			0.003	0.045556	-0.00385	0.067205	0.042121	0.072657
0.004	1.02762	1.01028	1.05566	1.0515	1.06285			0.004	0.03662	-0.01665	0.07043	0.037621	0.05809
0.005	1.01873	1.03621	1.05373	1.03919	1.05497			0.005	0.026219	0.015467	0.068063	0.022919	0.048718
0.006	1.01171	1.02005	1.0326	1.01306	1.04594			0.006	0.018006	-0.00453	0.042036	-0.0083	0.037994
0.007	1.00305	1.03582	1.03054	1.03011	1.05249			0.007	0.007864	0.015004	0.039507	0.012096	0.045811
0.008	1.01052	1.01463	1.0304	1.02962	1.06213			0.008	0.016614	-0.01122	0.039346	0.011516	0.057313
0.009	1.02111	1.02837	1.03753	1.04919	1.0432			0.009	0.029025	0.005798	0.048147	0.03494	0.034777
0.01	1.0189	1.03963	1.06845	1.03687	1.0623			0.01	0.026443	0.019748	0.086255	0.020221	0.057556
0.011	1.00398	1.03059	1.03507	1.01852	1.04815			0.011	0.00897	0.008563	0.045145	-0.0017	0.040714
0.012	0.987748	1.01563	1.03341	1.03298	1.05467			0.012	-0.01003	-0.00995	0.043105	0.015609	0.048501
0.013	0.998566	1.01148	1.03254	1.02856	1.05661			0.013	0.002641	-0.01508	0.04205	0.010344	0.050837
0.014	1.02074	1.02246	1.02278	1.03778	1.04502			0.014	0.028615	-0.00147	0.030032	0.021377	0.037047
0.015	1.00346	1.01766	1.0171	1.02657	1.07376			0.015	0.00838	-0.0074	0.023048	0.007989	0.071301
0.016	1.00408	1.01899	1.034	1.0297	1.06257			0.016	0.009118	-0.00575	0.043889	0.01175	0.05799
0.017	1.00003	1.02253	1.03585	1.04341	1.044			0.017	0.004378	-0.00136	0.046183	0.028153	0.035893
0.018	1.01462	1.03735	1.02814	1.02849	1.03854			0.018	0.021474	0.016999	0.036698	0.010333	0.029396
0.019	1.01242	1.01048	1.02723	1.03368	1.04757			0.019	0.018906	-0.01627	0.035581	0.016559	0.04018
0.02	1.01208	1.03781	1.00855	1.02676	1.06433			0.02	0.018509	0.01759	0.012584	0.008288	0.060157
0.021	1.02665	1.02207	1.03658	1.05004	1.06155			0.021	0.03558	-0.00189	0.047136	0.036144	0.056865
0.022	1.01822	1.01966	1.02739	1.03281	1.04837			0.022	0.025712	-0.00488	0.035819	0.015567	0.041184
0.023	1.00648	1.03852	1.03921	1.03524	1.05152			0.023	0.01197	0.018495	0.050405	0.018492	0.044956
0.024	1.01909	1.03665	1.03994	1.03777	1.05604			0.024	0.026746	0.016185	0.051302	0.021522	0.050361
0.025	1.02655	1.02745	1.03645	1.02784	1.03294			0.025	0.035472	0.004802	0.047011	0.009664	0.022861
0.026	1.00316	1.00357	1.01462	1.01664	1.03795			0.026	0.008088	-0.02475	0.020138	-0.0037	0.028855
0.027	1.0235	1.04456	1.04702	1.00935	1.05781			0.027	0.031918	0.026016	0.060076	-0.01241	0.052533
0.028	1.01744	1.02991	1.01841	1.02503	1.05424			0.028	0.024821	0.007875	0.024834	0.006355	0.048293
0.029	0.999838	1.03424	1.03215	1.04378	1.05508			0.029	0.00422	0.013256	0.041768	0.028794	0.049321
0.03	1.00462	1.02511	1.02138	1.02802	1.04139			0.03	0.009826	0.00195	0.028513	0.009958	0.033028
0.031	1.00736	1.03357	1.02989	1.03872	1.0298			0.031	0.013035	0.012442	0.039016	0.022777	0.019237
0.032	0.980943	1.027	1.03176	1.03464	1.0523			0.032	-0.0179	0.004312	0.041341	0.01791	0.046059
0.033	1.03245	1.0318	1.039	1.01237	1.03875			0.033	0.042426	0.010263	0.050266	-0.0087	0.029942
0.034	1.02112	1.03301	1.02693	1.03159	1.03351			0.034	0.02917	0.011769	0.035402	0.014294	0.023713
0.035	1.01616	1.03805	1.01248	1.04341	1.05346			0.035	0.02337	0.018018	0.017615	0.028439	0.04749
0.036	0.996619	1.04409	1.03303	1.04273	1.0534			0.036	0.00048	0.025521	0.04295	0.027647	0.04744
0.037	1.01203	1.04161	1.02588	1.01831	1.05964			0.037	0.018536	0.022447	0.034151	-0.00154	0.054898
0.038	0.992828	1.02375	1.01476	1.02871	1.04278			0.038	-0.00394	0.000345	0.020462	0.010918	0.034835
0.039	1.01585	1.03043	1.0291	1.04312	1.06424			0.039	0.023024	0.008625	0.038151	0.028152	0.060422
0.04	1.01319	1.02297	1.02302	1.02582	1.03345			0.04	0.019918	-0.0006	0.030656	0.007492	0.023758
0.041	1.01505	1.03435	1.04475	1.0391	1.04262			0.041	0.022098	0.013496	0.057448	0.023384	0.034701
0.042	1.01264	1.05061	1.03456	1.04172	1.06225			0.042	0.01928	0.03364	0.044918	0.026528	0.058104
0.043	1.00898	1.01908	1.0216	1.01554	1.04328			0.043	0.015006	-0.00539	0.028947	-0.00475	0.035526
0.044	1.02462	1.02795	1.01737	1.0164	1.04536			0.044	0.033322	0.005606	0.023765	-0.0037	0.038025
0.045	1.01434	1.01783	1.03076	1.02949	1.03224			0.045	0.02128	-0.00692	0.040274	0.011959	0.022411
0.046	1.01	1.0299	1.02281	1.03238	1.04746			0.046	0.016204	0.008035	0.030483	0.015424	0.040566
0.047	1.01197	1.02858	1.0343	1.03315	1.03649			0.047	0.018527	0.006411	0.044656	0.016363	0.027515
0.048	1.01199	1.01518	1.02513	1.02978	1.04034			0.048	0.018549	-0.01017	0.033361	0.012357	0.032119
0.049	0.997643	1.02065	1.00393	1.04699	1.03525			0.049	0.001753	-0.00339	0.007252	0.032943	0.02608
0.05	0.995398	1.01314	1.02699	1.03281	1.04324			0.05	-0.00087	-0.01269	0.035685	0.016013	0.035607
0.051	0.992742	1.01326	1.02166	1.0264	1.03715			0.051	-0.00398	-0.01252	0.029136	0.008354	0.028378
0.052	0.995765	1.02301	1.02943	1.03956	1.02269			0.052	-0.00043	-0.00044	0.038724	0.02411	0.011169
0.053	0.999394	1.00309	1.01175	1.01739	1.02973			0.053	0.003826	-0.0251	0.016945	-0.00239	0.019573
0.054	1.00621	1.00141	1.003	1.04011	1.02214			0.054	0.011812	-0.02718	0.006179	0.02479	0.010552
0.055	1.00579	1.02132	1.02278	1.00428	1.02189			0.055	0.011321	-0.0025	0.030561	-0.01803	0.010273
0.056	1.00598	1.01362	0.997184	1.02314	1.01671			0.056	0.011555	-0.01204	-0.00097	0.004542	0.004119
0.057	1.01442	0.999903	1.02285	1.02526	1.01882			0.057	0.02144	-0.02901	0.03067	0.007092	0.006649
0.058	1.02649	1.02566	1.01405	1.02901	1.03718			0.058	0.035577	0.002896	0.019842	0.011593	0.02855
0.059	0.998788	1.02376	1.00965	1.03056	1.04208			0.059	0.00314	0.000548	0.014438	0.013457	0.034396
0.06	1.01598	1.03708	1.00631	1.01722	1.0417			0.06	0.02328	0.017053	0.010331	-0.00247	0.033967
0.061	0.991137	1.02491	1.00358	1.03579	1.03343			0.061	-0.0058	0.001994	0.006978	0.019745	0.024134
0.062	1.00651	0.999976	1.01481	1.03178	1.03367			0.062	0.012197	-0.02887	0.020831	0.014968	0.024437
0.063	1.01093	1.02395	1.02905	0.998453	1.00468			0.063	0.01739	0.00083	0.038391	-0.02487	-0.01007
0.064	1.00181	1.02096	0.998255	1.03299	1.01514			0.064	0.006707	-0.00286	0.000455	0.016443	0.002402
0.065	0.995295	1.01472	1.02475	1.03329	1.01792			0.065	-0.00092	-0.0106	0.033122	0.016816	0.005747
0.066	0.999428	1.01338	1.01095	0.999816	1.01275			0.066	0.003933	-0.01223	0.016121	-0.02319	-0.0004
0.067	0.984623	1.00943	1.02262	1.01796	1.02074			0.067	-0.0134	-0.01712	0.030516	-0.00148	0.009128
0.068	1.02318	1.01906	1.01239	1.01167	1.02292			0.068	0.03176	-0.00519	0.017933	-0.00898	0.011748
0.069	1.00895	1.01338	1.0278	1.03222	1.02308			0.069	0.015095	-0.01221	0.036936	0.015599	0.011958
0.07	0.999676	1.01438	1.00499	1.02352	1.0103			0.07	0.004245	-0.01096	0.008841	0.005215	-0.00324
0.071	0.988499	1.04262	1.01324	1.00507	1.02148			0.071	-0.00884	0.024022	0.019009	-0.01682	0.010089
0.072	0.997208	1.01905	1.00833	1.02973	1.01528			0.072	0.001363	-0.00516	0.01298	0.012679	0.002731
0.073	1.00384	1.01239	1.02208	1.02735	1.02176			0.073	0.009144	-0.0134	0.029937	0.009848	0.01047
0.074	0.993622	1.02679	1.0022	1.01664	1.02173			0.074	-0.00283	0.004442	0.005445	-0.00295	0.010451
0.075	0.983359	1.03301	1.0194	0.995316	1.03227			0.075	-0.01484	0.01215	0.026661	-0.02842	0.023021
0.076	0.993127	1.02089	1.00393	1.02917	1.03554			0.076	-0.00339	-0.00285	0.0076	0.012063	0.026938
0.077	0.988559	1.02496	1.01429	1.00084	1.0185			0.077	-0.00874	0.002212	0.020383	-0.02179	0.006656
0.078	0.995961	1.02101	1.02084	1.01001	1.0277			0.078	-6.17e-05	-0.00268	0.028469	-0.01081	0.01763
0.079	1.00747	1.01555	1.0132	1.01396	1.01763			0.079	0.013424	-0.00944	0.019074	-0.00607	0.005664
0.08	0.99819	1.01282	1.01657	1.00677	1.02413			0.08	0.002557	-0.0128	0.023237	-0.01465	0.01342
0.081	1.00669	1.00905	1.01454	1.03004	1.02912			0.081	0.012519	-0.01745	0.020749	0.013186	0.019375
0.082	0.976614	1.03578	1.00754	1.01231	1.01426			0.082	-0.0227	0.015655	0.012131	-0.00799	0.001701
0.083	0.990044	1.00791	1.00234	1.02538	1.02393			0.083	-0.00696	-0.01884	0.005735	0.007642	0.013241
0.084	0.985929	1.02688	1.0171	1.01777	1.03695			0.084	-0.01178	0.004642	0.023937	-0.00144	0.028769
0.085	1.00985	1.02811	1.00778	1.01567	1.0238			0.085	0.016233	0.006184	0.012468	-0.00392	0.013126
0.086	1.0217	1.03327	1.0145	1.02109	1.015			0.086	0.030124	0.012571	0.020759	0.00257	0.002655
0.087	1.01357	1.00477	1.00309	1.0038	1.01044			0.087	0.020606	-0.0227	0.006712	-0.0181	-0.00275
0.088	0.993733	1.02528	1.0159	1.00926	1.03116			0.088	-0.00263	0.002702	0.022508	-0.01154	0.021941
0.089	1.00936	1.01025	0.998491	1.00662	1.01503			0.089	0.015682	-0.0159	0.001075	-0.01469	0.002757
0.09	0.992982	1.01154	1.02351	1.01648	1.03259			0.09	-0.00349	-0.01429	0.031918	-0.00289	0.023688
0.091	0.991692	1.02073	1.00991	1.02068	0.993124			0.091	-0.005	-0.0029	0.015163	0.002161	-0.0233
0.092	0.992461	1.02096	1.00594	1.00573	1.03043			0.092	-0.00409	-0.00261	0.010293	-0.01571	0.021156
0.093	1.00466	1.02498	0.994287	1.01369	1.0143			0.093	0.010202	0.002375	-0.00405	-0.00617	0.001956
0.094	0.997695	1.02634	0.981456	1.02835	1.00042			0.094	0.002051	0.004069	-0.01986	0.011381	-0.01456
0.095	0.99071	1.02275	1.00503	1.02199	1.00751			0.095	-0.00612	-0.00037	0.009209	0.003781	-0.00609
0.096	0.990745	1.02952	0.986683	1.01853	0.992301			0.096	-0.00608	0.008024	-0.01339	-0.00034	-0.02419
0.097	0.98972	1.01246	0.989426	1.01517	0.995021			0.097	-0.00728	-0.01309	-0.01	-0.00434	-0.02093
0.098	0.998318	1.02922	0.995407	1.01817	1.01371			0.098	0.002797	0.007678	-0.00262	-0.00073	0.001358
0.099	0.996166	1.01399	1.00717	1.03305	1.02304			0.099	0.000285	-0.01117	0.011902	0.017082	0.012485
0.1	0.991701	1.01628	0.987559	1.02297	0.998598			0.1	-0.00494	-0.00833	-0.01226	0.005029	-0.01661
0.101	1.00434	1.00628	0.99862	1.03121	1.02214			0.101	0.00987	-0.0207	0.001383	0.014908	0.011455
0.102	0.999949	1.03203	0.999935	1.02876	1.01288			0.102	0.004733	0.011187	0.003014	0.011987	0.000442
0.103	0.974086	1.02941	1.01808	1.0104	0.998279			0.103	-0.02556	0.00796	0.025389	-0.00995	-0.01693
0.104	0.980157	1.0353	0.988111	1.02073	1.0098			0.104	-0.01844	0.015263	-0.01152	0.00243	-0.00319
0.105	1.00061	1.01367	1.00876	1.01348	1.01248			0.105	0.005519	-0.01151	0.013939	-0.00623	1.75e-05
0.106	1.0314	1.01923	0.992745	1.01863	1.02253			0.106	0.041582	-0.00462	-0.00579	-5.64e-05	0.012008
0.107	0.997567	1.02395	0.990148	1.0195	1.00233			0.107	0.001967	0.001231	-0.00898	0.000989	-0.01202
0.108	0.974334	1.02775	0.998077	1.02439	1.01717			0.108	-0.02524	0.005947	0.00081	0.006863	0.005661
0.109	1.00505	1.03519	0.998101	1.007	1.00382			0.109	0.010737	0.015164	0.000854	-0.01392	-0.01022
0.11	1.01077	1.01646	1.0179	1.03014	1.00348			0.11	0.017456	-0.00801	0.025257	0.013771	-0.01061
0.111	1.00844	1.0151	0.993483	1.00939	1.01353			0.111	0.014729	-0.00969	-0.00481	-0.01103	0.001391
0.112	1.01484	1.03247	0.985068	1.01168	1.0116			0.112	0.022226	0.011835	-0.01517	-0.00827	-0.00089
0.113	0.9889	1.01464	0.991682	1.02836	1.01304			0.113	-0.00816	-0.01023	-0.00701	0.01169	0.000842
0.114	0.987935	1.01464	1.00607	1.00254	1.0095			0.114	-0.00927	-0.01022	0.010736	-0.01916	-0.00335
0.115	1.00854	1.02334	1.0038	1.00693	1.00606			0.115	0.014858	0.00055	0.00795	-0.01391	-0.00743
0.116	0.990625	1.01967	0.995439	1.03327	1.02127			0.116	-0.00611	-0.00399	-0.00234	0.017612	0.010703
0.117	0.990745	1.01018	0.978746	1.02807	1.01551			0.117	-0.00597	-0.01573	-0.0229	0.011403	0.003863
0.118	0.990283	1.00913	0.989994	1.0274	1.00995			0.118	-0.00651	-0.01702	-0.00902	0.010617	-0.00274
0.119	0.990523	1.02917	0.99802	1.00524	1.02598			0.119	-0.00622	0.007804	0.000883	-0.01586	0.016361
0.12	1.01458	1.02559	0.987413	1.02678	1.0173			0.12	0.021963	0.003388	-0.01218	0.009915	0.006049
0.121	1.00187	1.01127	0.972992	1.0111	0.978096			0.121	0.007083	-0.01435	-0.02994	-0.00882	-0.04063
0.122	0.989498	1.02105	0.996413	1.01273	1.0173			0.122	-0.0074	-0.00222	-0.00106	-0.00686	0.00608
0.123	0.984008	1.0304	0.998336	1.01802	1.00258			0.123	-0.01382	0.009367	0.001323	-0.00052	-0.01143
0.124	1.0132	1.01425	0.992753	1.00446	1.02566			0.124	0.020367	-0.01061	-0.00555	-0.01672	0.016075
0.125	0.98189	1.02029	0.997484	0.984644	1.01283			0.125	-0.0163	-0.00313	0.000297	-0.04039	0.000818
0.126	0.984418	1.01662	0.992225	1.01377	1.02088			0.126	-0.01334	-0.00767	-0.00617	-0.00555	0.010429
0.127	1.00826	1.02969	0.996234	1.02567	1.02372			0.127	0.014592	0.008519	-0.00122	0.008691	0.013826
0.128	1.0145	1.03239	1.00706	1.01855	1.01581			0.128	0.021907	0.011878	0.01213	0.000193	0.00443
0.129	0.996004	1.02337	1.00465	1.01279	1.01471			0.129	0.000252	0.000725	0.009175	-0.00667	0.003131
0.13	0.993784	1.02883	0.998085	1.00172	1.0177			0.13	-0.00234	0.007493	0.001101	-0.01989	0.006712
0.131	1.00071	1.02841	0.989036	1.02943	0.999782			0.131	0.00577	0.006976	-0.01004	0.013256	-0.01461
0.132	0.989063	1.02775	1.00579	1.00601	1.01212			0.132	-0.00786	0.006169	0.010625	-0.01474	0.000112
0.133	1.00011	1.02036	1.00215	1.01416	0.99759			0.133	0.005079	-0.00298	0.006151	-0.00498	-0.01718
0.134	0.989139	1.01845	0.9879	1.01421	1.0141			0.134	-0.00776	-0.00533	-0.0114	-0.00489	0.002501
0.135	0.993844	1.00705	0.985498	1.02406	1.00383			0.135	-0.00225	-0.01944	-0.01435	0.006896	-0.00971
0.136	1.00266	1.0065	0.996381	1.02184	1.01882			0.136	0.008095	-0.02011	-0.00092	0.004256	0.008161
0.137	0.982881	1.01472	0.984045	1.00094	1.01752			0.137	-0.01507	-0.00993	-0.01611	-0.02071	0.006633
0.138	1.00648	1.01321	0.999399	1.02286	0.999824			0.138	0.012575	-0.01178	0.00282	0.005501	-0.01442
0.139	1.00105	1.02374	0.981464	1.02721	1.00482			0.139	0.006217	0.001268	-0.01926	0.010722	-0.00845
0.14	0.980755	1.02399	0.989458	1.01362	1.02117			0.14	-0.01755	0.00159	-0.00941	-0.0055	0.011046
0.141	1.00385	1.0181	0.999059	1.02134	1.02511			0.141	0.009508	-0.0057	0.002439	0.003742	0.015757
0.142	0.988747	1.03992	0.983867	1.02652	1.0068			0.142	-0.00818	0.02133	-0.01626	0.009952	-0.00604
0.143	0.987491	1.02302	1.00384	0.99913	1.00641			0.143	-0.00965	0.000411	0.008356	-0.02278	-0.00648
0.144	0.9934	1.01883	0.997022	1.00105	0.997859			0.144	-0.00271	-0.00476	-3.04e-05	-0.02046	-0.01665
0.145	0.997994	1.01044	1.00373	1.01541	1.03252			0.145	0.002663	-0.01514	0.008251	-0.0033	0.024645
0.146	0.974983	1.00518	0.993946	1.0146	0.995685			0.146	-0.02428	-0.02166	-0.00379	-0.00423	-0.01921
0.147	0.999419	0.999879	0.975208	1.01936	1.0025			0.147	0.004345	-0.0282	-0.02687	0.001472	-0.01106
0.148	0.997387	1.02972	0.998604	1.03269	1.01608			0.148	0.001968	0.008752	0.001967	0.017426	0.005125
0.149	0.993571	1.02017	0.989004	1.03242	1.03295			0.149	-0.00249	-0.00306	-0.00985	0.017113	0.025248
0.15	0.976716	1.03438	1.00351	1.03929	1.00485			0.15	-0.02223	0.014545	0.008034	0.025345	-0.0082
0.151	0.991393	1.03526	1.0017	1.03211	1.02363			0.151	-0.00503	0.015646	0.005834	0.016778	0.014176
0.152	0.973369	1.02126	0.996291	1.01179	1.02122			0.152	-0.02613	-0.00169	-0.00083	-0.0075	0.011334
0.153	1.0116	1.01727	0.988996	1.00532	1.0073			0.153	0.018643	-0.00661	-0.0098	-0.01522	-0.00522
0.154	0.990975	1.02272	1.01215	1.01091	1.00596			0.154	-0.00551	0.000141	0.018736	-0.00853	-0.00681
0.155	1.00929	1.01223	0.987957	1.02931	1.00625			0.155	0.015946	-0.01283	-0.01106	0.013501	-0.00645
0.156	0.994809	1.01635	0.99845	1.02093	0.999127			0.156	-0.001	-0.00773	0.001886	0.003491	-0.01491
0.157	1.00779	1.0328	0.98084	0.999197	1.02431			0.157	0.014208	0.01265	-0.0198	-0.02248	0.015108
0.158	0.979807	1.02676	0.993427	1.02145	0.988557			0.158	-0.01857	0.005176	-0.00428	0.00414	-0.02746
0.159	0.998164	0.995857	0.987251	1.01483	1.01814			0.159	0.002942	-0.03307	-0.01188	-0.00376	0.007798
0.16	1.0158	1.02113	0.987064	1.01066	1.03077			0.16	0.023594	-0.00177	-0.01209	-0.00873	0.022854
0.161	0.970091	1.03318	0.994871	1.01516	0.995198			0.161	-0.02993	0.013159	-0.00246	-0.00334	-0.0195
0.162	0.994826	1.02594	1.02167	1.01818	1.01417			0.162	-0.00095	0.004211	0.030574	0.000299	0.003125
0.163	0.994706	1.01654	1.00648	1.01465	1.02179			0.163	-0.00109	-0.00743	0.011871	-0.00391	0.012208
0.164	1.01502	1.02873	0.986756	1.00426	1.0193			0.164	0.022707	0.007687	-0.01242	-0.01633	0.009273
0.165	0.992802	1.033	0.999708	1.03147	1.00663			0.165	-0.0033	0.012975	0.003549	0.016237	-0.0058
0.166	0.992888	1.01473	0.998182	1.02062	1.01803			0.166	-0.0032	-0.00964	0.001679	0.003276	0.007795
0.167	1.00283	1.0152	0.980937	1.03016	1.02258			0.167	0.008448	-0.00905	-0.01956	0.014697	0.013238
0.168	0.994723	1.03133	1.00652	1.01664	1.02634			0.168	-0.00104	0.010943	0.01199	-0.00144	0.017728
0.169	0.991803	1.0313	0.996251	1.03	1.00362			0.169	-0.00445	0.010914	-0.00066	0.014538	-0.00931
0.17	1.02519	1.00542	0.993394	1.02259	1.02787			0.17	0.034647	-0.02113	-0.00417	0.00569	0.019589
0.171	0.981848	1.02399	1.00829	1.0169	1.02222			0.171	-0.01611	0.001884	0.014193	-0.0011	0.012871
0.172	0.98201	1.02949	0.994644	1.01911	1.00844			0.172	-0.01591	0.0087	-0.0026	0.001571	-0.00351
0.173	1.0045	1.02952	0.997509	1.03684	1.01988			0.173	0.01044	0.008738	0.000944	0.022782	0.010131
0.174	0.989703	1.02869	0.983526	1.01465	0.995517			0.174	-0.00689	0.007718	-0.01627	-0.00374	-0.01887
0.175	0.997439	1.02164	0.993248	1.01526	1.01426			0.175	0.002172	-0.001	-0.00429	-0.00299	0.003479
0.176	1.00439	1.03699	1.00083	1.0277	1.01447			0.176	0.010317	0.018014	0.005074	0.011903	0.003734
0.177	0.991624	1.0187	0.98144	1.01269	1.02079			0.177	-0.00462	-0.00461	-0.01881	-0.00603	0.011292
0.178	1.00776	1.02025	1.01333	1.02484	1.01154			0.178	0.014281	-0.00268	0.020494	0.008508	0.000287
0.179	0.995569	1.03217	0.983891	1.02845	1.00901			0.179	4.72e-06	0.012075	-0.01576	0.012845	-0.0027
0.18	0.984136	1.00921	0.990107	1.00421	1.00351			0.18	-0.01338	-0.01635	-0.00808	-0.01613	-0.00924
0.181	0.989139	1.01428	0.995569	1.01248	0.990496			0.181	-0.00751	-0.01005	-0.00135	-0.00622	-0.02471
0.182	0.994843	1.0276	0.974672	1.00687	1.00657			0.182	-0.00083	0.006457	-0.02708	-0.01292	-0.00554
0.183	0.98493	1.01899	0.985157	1.02447	1.00763			0.183	-0.01243	-0.00421	-0.01415	0.008147	-0.00426
0.184	0.999266	1.02608	0.997996	1.00205	1.01103			0.184	0.004363	0.004585	0.001681	-0.01865	-0.0002
0.185	0.998677	1.01232	0.984548	1.02469	1.00488			0.185	0.003682	-0.01245	-0.01488	0.008446	-0.00751
0.186	0.994689	1.01687	0.999424	1.0007	1.00908			0.186	-0.00099	-0.0068	0.003469	-0.02023	-0.00248
0.187	1.01057	0.999774	0.986504	1.0262	1.02791			0.187	0.017616	-0.02797	-0.01244	0.010277	0.019958
0.188	1.00928	1.04911	1.00669	1.01897	0.999211			0.188	0.016112	0.033139	0.012459	0.001648	-0.0142
0.189	0.99054	1.03032	0.997192	1.00983	1.01906			0.189	-0.00583	0.009878	0.000761	-0.00926	0.009453
0.19	0.996679	1.03591	1.00678	1.01074	1.02263			0.19	0.00136	0.016816	0.012592	-0.00816	0.013721
0.191	1.00219	1.02638	1.00075	1.03008	1.01396			0.191	0.007833	0.005014	0.005167	0.01498	0.003426
0.192	0.983402	1.01576	0.998888	1.00654	1.01117			0.192	-0.01417	-0.00811	0.002884	-0.01315	0.000117
0.193	1.01075	1.01359	1.01316	1.00832	1.01135			0.193	0.017862	-0.0108	0.020482	-0.011	0.00035
0.194	1.01521	1.03509	0.992915	1.01766	1.00078			0.194	0.023086	0.01583	-0.00445	0.000172	-0.01222
0.195	0.991086	1.03092	1.00809	1.04223	1.00658			0.195	-0.00516	0.010676	0.014266	0.029568	-0.00529
0.196	1.0081	1.03918	0.995253	1.01584	1.00897			0.196	0.014771	0.020908	-0.00154	-0.00196	-0.00243
0.197	0.989182	1.01163	1.01317	1.0169	1.02543			0.197	-0.00738	-0.01319	0.020555	-0.00069	0.017197
0.198	0.99217	1.01714	0.988371	1.03238	1.00662			0.198	-0.00387	-0.00635	-0.00999	0.017838	-0.00519
0.199	0.990002	1.03933	0.996478	1.00499	1.0193			0.199	-0.00641	0.021127	1.25e-05	-0.01489	0.009932
0.2	0.972789	1.00821	1.00294	1.01237	1.0105			0.2	-0.02656	-0.01739	0.007984	-0.00605	-0.00052
0.201	0.980003	1.02557	0.985165	1.01409	1.02275			0.201	-0.01811	0.004108	-0.01391	-0.00397	0.014083
0.202	0.98131	1.04816	0.999667	1.02466	1.02766			0.202	-0.01658	0.032086	0.00398	0.008677	0.019953
0.203	0.98446	1.03058	0.993053	1.02206	1.00903			0.203	-0.01288	0.010323	-0.00416	0.005586	-0.00221
0.204	1.00729	1.0174	0.997241	1.0149	1.00636			0.204	0.013869	-0.00597	0.001016	-0.00296	-0.00539
0.205	0.990403	1.02478	0.999042	1.0007	1.01365			0.205	-0.0059	0.00317	0.003242	-0.01992	0.003318
0.206	0.993255	1.031	0.995666	1.03289	1.00427			0.206	-0.00256	0.010885	-0.0009	0.018582	-0.00783
0.207	1.01403	1.0352	1.00408	1.01862	0.988935			0.207	0.021772	0.016096	0.009478	0.00153	-0.02609
0.208	0.997737	0.999661	0.988176	1.01914	1.00587			0.208	0.002696	-0.02791	-0.01011	0.002173	-0.00589
0.209	0.983735	1.00149	0.997509	1.01093	1.01106			0.209	-0.01369	-0.02563	0.001407	-0.00763	0.000311
0.21	1.00288	1.0004	1.00183	0.992682	1.01046			0.21	0.008727	-0.02697	0.006753	-0.02943	-0.00038
0.211	1.0028	1.0117	0.997509	1.01698	0.987264			0.211	0.008642	-0.01297	0.001433	-0.00037	-0.02799
0.212	0.998164	1.01232	0.999115	1.00514	1.00604			0.212	0.00322	-0.01219	0.003429	-0.0145	-0.00562
0.213	1.0072	1.01735	0.993037	1.00313	1.00976			0.213	0.013802	-0.00596	-0.00405	-0.0169	-0.00115
0.214	0.977894	1.01804	0.991779	0.998963	1.02041			0.214	-0.02051	-0.00509	-0.00559	-0.02186	0.011545
0.215	0.989857	1.02252	0.983347	0.993468	1.00997			0.215	-0.0065	0.000461	-0.01597	-0.02841	-0.00087
0.216	0.991667	1.0178	0.997517	1.01463	1.00893			0.216	-0.00437	-0.00537	0.001507	-0.0031	-0.00209
0.217	0.998258	1.01281	1.00146	1.00979	1.00879			0.217	0.003354	-0.01154	0.006379	-0.00886	-0.00225
0.218	0.988405	1.04042	0.995017	1.0113	0.993468			0.218	-0.00818	0.022652	-0.00154	-0.00705	-0.02047
0.219	0.985348	1.01463	0.999813	1.01342	1.0219			0.219	-0.01176	-0.00926	0.004375	-0.0045	0.013409
0.22	0.982326	1.01589	1.00022	1.01671	1.01076			0.22	-0.01528	-0.00771	0.004884	-0.00054	0.00017
0.221	0.985186	1.01176	1.00403	1.01795	0.996079			0.221	-0.01194	-0.01281	0.009596	0.000951	-0.01731
0.222	0.976084	1.00909	0.989718	1.02232	1.0202			0.222	-0.02259	-0.01611	-0.00803	0.006193	0.011445
0.223	0.98832	1.0321	0.996372	1.01625	1.01289			0.223	-0.00825	0.012406	0.000185	-0.00105	0.002752
0.224	0.984341	1.02299	0.988703	1.02802	0.999379			0.224	-0.01291	0.001133	-0.00925	0.013039	-0.01332
0.225	0.998241	1.02989	1.00209	0.994597	1.01542			0.225	0.003375	0.009678	0.007252	-0.0269	0.005811
0.226	0.996175	1.01018	0.984183	1.01276	1.00739			0.226	0.000967	-0.01472	-0.01479	-0.00518	-0.00375
0.227	0.992153	1.02369	0.991674	1.03908	1.00498			0.227	-0.00374	0.002022	-0.00555	0.026323	-0.00659
0.228	0.996755	1.01857	1.00936	1.00542	0.99974			0.228	0.00165	-0.00432	0.016255	-0.01392	-0.01282
0.229	0.98043	1.02542	1.00542	1.02323	0.998497			0.229	-0.01746	0.004184	0.011416	0.007403	-0.01428
0.23	1.00169	1.01328	0.997338	1.00784	1.00472			0.23	0.007445	-0.01084	0.001465	-0.01099	-0.00684
0.231	0.995381	1.02755	1.00072	1.00687	1.01717			0.231	6.36e-05	0.006844	0.00565	-0.01213	0.008009
0.232	0.971892	1.02978	0.988476	1.01104	1.02042			0.232	-0.02745	0.009607	-0.00943	-0.00714	0.011895
0.233	0.983624	1.01476	1.00333	1.01446	1.01806			0.233	-0.0137	-0.00899	0.008888	-0.00302	0.009107
0.234	0.98738	1.02275	0.993913	1.0325	1.01635			0.234	-0.0093	0.000921	-0.0027	0.018562	0.007095
0.235	1.01413	1.02739	0.964812	1.04603	1.00244			0.235	0.022043	0.006674	-0.03855	0.034742	-0.00946
0.236	0.995167	1.00786	0.982089	1.01143	1.00986			0.236	-0.00016	-0.0175	-0.01724	-0.00661	-0.00061
0.237	1.00871	1.02683	1.00597	1.01627	1.01481			0.237	0.015704	0.006006	0.012198	-0.00081	0.005307
0.238	0.99784	1.0089	0.993776	1.0215	1.01553			0.238	0.002976	-0.01619	-0.00282	0.005471	0.006189
0.239	0.976528	1.01449	0.985303	1.00452	1.02554			0.239	-0.02197	-0.00926	-0.01324	-0.01482	0.018124
0.24	0.996252	1.0127	0.994433	1.00162	1.01165			0.24	0.001127	-0.01147	-0.00198	-0.01827	0.001602
0.241	0.990762	1.02949	1.01239	1.01094	1.00191			0.241	-0.00529	0.00933	0.02016	-0.00711	-0.00998
0.242	0.989916	1.0087	1.01274	1.02372	1.00495			0.242	-0.00628	-0.0164	0.0206	0.008181	-0.00634
0.243	0.994629	1.02735	0.988476	1.03731	1.01833			0.243	-0.00076	0.006702	-0.00928	0.024448	0.009617
0.244	0.974838	1.01547	1.01523	1.00926	1.03788			0.244	-0.02393	-0.00801	0.023694	-0.00907	0.03292
0.245	0.991214	1.03018	0.995001	1.00871	1.001			0.245	-0.00475	0.010231	-0.00122	-0.00971	-0.01099
0.246	1.00373	1.03048	0.994027	1.02906	1.01082			0.246	0.009915	0.010607	-0.00241	0.014632	0.000733
0.247	0.990574	1.03741	0.986269	1.01585	1.00897			0.247	-0.00549	0.019199	-0.01195	-0.00115	-0.00146
0.248	0.99217	1.01434	0.990481	1.02907	1.0204			0.248	-0.00361	-0.00936	-0.00675	0.014685	0.012177
0.249	1.00549	1.01152	0.989904	1.01572	1.03044			0.249	0.011998	-0.01284	-0.00745	-0.00126	0.024158
0.25	0.985767	1.00887	0.993224	1.02583	1.00479			0.25	-0.0111	-0.01611	-0.00334	0.010833	-0.00638
0.251	0.995739	1.04815	1.02341	1.0088	1.01539			0.251	0.000581	0.032533	0.033869	-0.00951	0.006267
0.252	0.981805	1.00645	0.98695	1.0121	1.00354			0.252	-0.01573	-0.0191	-0.01105	-0.00555	-0.00782
0.253	0.992649	1.01703	0.992599	1.0281	0.996549			0.253	-0.00303	-0.00598	-0.00408	0.013606	-0.01614
0.254	0.99042	1.02876	0.998547	1.01822	1.0049			0.254	-0.00563	0.008552	0.003262	0.001796	-0.00616
0.255	0.982676	1.03403	0.975638	1.02313	1.00822			0.255	-0.01469	0.015084	-0.02495	0.007686	-0.0022
0.256	1.00779	1.03323	1.00898	1.01149	1.02174			0.256	0.014736	0.014109	0.01615	-0.00621	0.013932
0.257	0.984606	1.02865	0.986772	1.02048	1.00743			0.257	-0.01243	0.008449	-0.0112	0.004552	-0.0031
0.258	0.98908	1.0396	1.00868	1.01012	1.00495			0.258	-0.00718	0.022017	0.015809	-0.00782	-0.00603
0.259	0.999582	1.01096	1.00321	1.02024	1.01842			0.259	0.005132	-0.01344	0.009079	0.004293	0.010028
0.26	1.01579	1.0242	0.997776	1.02574	1.01148			0.26	0.02411	0.002969	0.002392	0.010877	0.001784
0.261	0.992777	1.02111	0.996673	1.01334	1.01875			0.261	-0.00283	-0.00086	0.001046	-0.00392	0.010455
0.262	1.01312	1.01966	1.00085	1.03974	1.00418			0.262	0.021002	-0.00264	0.006209	0.027655	-0.00688
0.263	0.990164	1.02093	0.997371	1.02746	1.00886			0.263	-0.00588	-0.00107	0.001928	0.012984	-0.00129
0.264	0.991769	1.0294	0.973406	1.01782	1.02186			0.264	-0.004	0.009446	-0.02759	0.001489	0.014219
0.265	0.991744	1.0222	0.993938	1.00779	1.00401			0.265	-0.00402	0.000536	-0.00227	-0.0105	-0.00702
0.266	1.00057	1.01816	1.00363	1.02021	1.00991			0.266	0.006327	-0.00446	0.009679	0.004365	2.14e-05
0.267	0.99918	1.00458	0.987397	1.01312	1.02131			0.267	0.004702	-0.02127	-0.01031	-0.00409	0.013621
0.268	0.978065	1.01958	0.978364	1.01756	1.00611			0.268	-0.02003	-0.00268	-0.02142	0.001231	-0.00447
0.269	0.985741	1.02319	1.00347	1.02035	1.01162			0.269	-0.01104	0.001801	0.00952	0.004582	0.002115
0.27	1.00907	1.02335	1.0045	1.01391	1.01487			0.27	0.01629	0.001993	0.010813	-0.0031	0.00601
0.271	1.01527	1.035	0.995959	1.01363	1.01918			0.271	0.023558	0.016437	0.00029	-0.00341	0.011165
0.272	0.988362	1.03457	0.995131	1.01084	1.00859			0.272	-0.00795	0.015912	-0.00071	-0.00674	-0.00144
0.273	0.996252	1.0005	0.984703	1.04292	1.02054			0.273	0.0013	-0.02626	-0.01355	0.031623	0.012819
0.274	0.995099	1.02999	0.996949	1.02896	1.02389			0.274	-3.94e-05	0.010256	0.001549	0.014968	0.01682
0.275	0.988337	1.00545	0.997866	1.01279	1.00016			0.275	-0.00796	-0.02012	0.002692	-0.00436	-0.01142
0.276	0.994518	1.02531	1.00526	1.01806	1.00992			0.276	-0.00072	0.004483	0.011815	0.001954	0.000226
0.277	1.00989	1.02401	0.987908	1.00952	0.990429			0.277	0.017295	0.002883	-0.00955	-0.00824	-0.02297
0.278	1.00287	1.01604	0.982065	1.01847	0.994106			0.278	0.009077	-0.00698	-0.01673	0.002481	-0.01857
0.279	0.993178	1.02819	0.988087	1.01054	1.00713			0.279	-0.00227	0.00808	-0.0093	-0.00699	-0.00304
0.28	0.985169	1.02065	0.993102	1.04411	1.00665			0.28	-0.01164	-0.00125	-0.00311	0.033167	-0.0036
0.281	1.00686	1.01429	1.00924	1.02042	1.01345			0.281	0.013761	-0.00912	0.016784	0.004863	0.004526
0.282	0.986458	1.01516	1.00155	1.02001	1.01161			0.282	-0.01012	-0.00803	0.007322	0.004376	0.002354
0.283	0.994834	1.01765	1.00013	1.01373	1.01281			0.283	-0.0003	-0.00494	0.005587	-0.00311	0.003801
0.284	1.00626	1.02059	0.999399	1.02165	1.01106			0.284	0.013076	-0.0013	0.004699	0.006374	0.001729
0.285	1.00164	1.01955	1.00006	1.01167	1.01195			0.285	0.007672	-0.00256	0.005537	-0.00554	0.002809
0.286	0.971781	1.03543	0.998888	1.01486	1.00754			0.286	-0.02729	0.017102	0.004093	-0.0017	-0.00242
0.287	1.00762	1.03452	0.990205	1.0287	1.01795			0.287	0.014687	0.015998	-0.00659	0.014862	0.010002
0.288	0.986364	1.03276	0.996007	1.01685	1.02107			0.288	-0.0102	0.013809	0.000571	0.000709	0.013738
0.289	0.994817	1.01395	1.00277	1.01257	0.998757			0.289	-0.00029	-0.00946	0.008914	-0.0044	-0.01282
0.29	0.975273	1.01056	0.990903	1.00948	0.990882			0.29	-0.02318	-0.01365	-0.00569	-0.00807	-0.02219
0.291	0.986945	1.02339	0.978218	1.0241	0.993359			0.291	-0.0095	0.00224	-0.02131	0.009408	-0.01921
0.292	0.988866	1.00482	1.00134	1.01807	1.00309			0.292	-0.00725	-0.02074	0.007191	0.002222	-0.0076
0.293	0.998156	1.02262	0.985887	1.03063	0.989665			0.293	0.003639	0.001315	-0.01183	0.017253	-0.02358
0.294	0.976597	1.0076	0.996851	1.02467	1.00622			0.294	-0.02161	-0.01728	0.001685	0.01015	-0.00383
0.295	0.986689	1.02057	1.00459	1.01113	0.994929			0.295	-0.00979	-0.00121	0.011235	-0.00602	-0.01727
0.296	0.995876	1.00729	1.00544	1.0211	1.00027			0.296	0.000985	-0.01764	0.012308	0.005909	-0.01089
0.297	0.991752	1.00971	0.995561	1.00968	1.0209			0.297	-0.00385	-0.01464	0.000136	-0.00773	0.013709
0.298	0.963593	1.02576	0.995772	1.01706	1.02666			0.298	-0.03682	0.005243	0.000416	0.001113	0.020587
0.299	0.994476	1.01513	0.991	1.00486	1.02004			0.299	-0.00064	-0.00792	-0.00546	-0.01346	0.012717
0.3	1.02413	1.03985	0.98648	1.00969	1.01386			0.3	0.034096	0.022704	-0.01102	-0.00767	0.005374
0.301	0.99603	1.03604	0.992599	1.00577	1.01784			0.301	0.001187	0.017997	-0.00346	-0.01234	0.01014
0.302	1.01661	1.01391	0.993394	1.00879	1.00578			0.302	0.025294	-0.00939	-0.00247	-0.00871	-0.0042
0.303	1.00774	1.03294	1.00299	1.00875	1.02169			0.303	0.014907	0.014187	0.009368	-0.00875	0.014755
0.304	0.969049	1.01955	0.974907	1.02393	1.00787			0.304	-0.0304	-0.00238	-0.02522	0.009416	-0.00168
0.305	0.985451	1.01191	0.991235	1.0096	0.99707			0.305	-0.01118	-0.01184	-0.00509	-0.0077	-0.01453
0.306	0.998284	1.02532	0.988574	1.00964	1.00154			0.306	0.003853	0.004768	-0.00836	-0.00764	-0.00919
0.307	0.995663	1.01853	1.00197	1.02183	1.00961			0.307	0.000792	-0.00363	0.00817	0.00696	0.00045
0.308	0.992742	1.03	0.987372	1.01219	1.01064			0.308	-0.00262	0.010592	-0.00982	-0.00454	0.001689
0.309	0.986484	1.03421	1.00537	1.00684	1.00197			0.309	-0.00995	0.015806	0.012383	-0.01094	-0.00862
0.31	0.991931	1.02252	0.986699	1.02345	1.03139			0.31	-0.00356	0.001341	-0.01061	0.008946	0.026447
0.311	0.999718	1.03364	0.985417	1.01807	1.01258			0.311	0.005558	0.015114	-0.01218	0.00253	0.004057
0.312	1.00539	1.01859	1.00043	1.01671	1.01609			0.312	0.012208	-0.00351	0.006327	0.000915	0.008257
0.313	0.994245	1.01534	0.989004	1.00525	0.991546			0.313	-0.00084	-0.00753	-0.00774	-0.01276	-0.02096
0.314	1.01055	1.00613	0.99858	1.01784	1.01058			0.314	0.018262	-0.01892	0.004078	0.002296	0.001734
0.315	0.994228	1.01428	0.987486	1.02502	0.994367			0.315	-0.00084	-0.00881	-0.00958	0.010895	-0.01756
0.316	0.993724	1.02432	1.00078	1.02289	1.02458			0.316	-0.00144	0.003633	0.006812	0.008369	0.018449
0.317	0.985647	1.01303	1.00097	1.0059	1.00515			0.317	-0.01089	-0.01034	0.007061	-0.01193	-0.00468
0.318	0.984512	1.03319	1.00341	1.02583	0.988926			0.318	-0.01221	0.014631	0.010074	0.01191	-0.02398
0.319	0.979952	1.04279	1.0144	1.01899	1.02638			0.319	-0.01755	0.026518	0.023629	0.003748	0.020643
0.32	0.991786	1.01663	0.994376	1.01324	0.999916			0.32	-0.00368	-0.00586	-0.00103	-0.00311	-0.01086
0.321	0.987961	1.01852	0.980223	1.01152	0.992184			0.321	-0.00816	-0.00351	-0.01845	-0.00515	-0.02004
0.322	0.989003	1.02621	0.987454	0.999724	0.997305			0.322	-0.00693	0.006023	-0.00953	-0.01924	-0.01393
0.323	0.995577	1.00803	0.972846	1.02152	1.00946			0.323	0.000769	-0.01648	-0.02751	0.006839	0.000577
0.324	1.00088	1.02041	0.986423	1.01858	1.02232			0.324	0.006992	-0.00114	-0.01078	0.003339	0.01591
0.325	1.00486	1.02092	0.98919	1.01578	1.02419			0.325	0.011658	-0.0005	-0.00735	1.42e-05	0.018148
0.326	0.974966	1.01383	1.00213	1.0112	1.00139			0.326	-0.02335	-0.00927	0.008605	-0.00546	-0.00898
0.327	0.997976	1.02657	1.01468	1.02334	1.00107			0.327	0.003606	0.00652	0.024089	0.009087	-0.00934
0.328	0.994501	1.02227	1.00636	1.0089	1.00529			0.328	-0.00046	0.001203	0.013847	-0.00817	-0.0043
0.329	0.999214	1.02792	0.97679	1.00716	1.00468			0.329	0.005066	0.0082	-0.02258	-0.01024	-0.00501
0.33	0.989361	1.02257	0.995715	1.01611	1.00196			0.33	-0.00647	0.001595	0.000751	0.000482	-0.00823
0.331	0.997054	1.01564	0.988062	0.993886	1.00816			0.331	0.002542	-0.00698	-0.00867	-0.02608	-0.00083
0.332	0.985161	1.01059	0.98032	1.00965	1.00771			0.332	-0.01138	-0.01323	-0.01819	-0.00721	-0.00135
0.333	0.983367	1.01913	0.99453	1.02269	1.00273			0.333	-0.01348	-0.00264	-0.00067	0.008402	-0.00726
0.334	0.998164	1.03205	0.995999	0.999389	1.00927			0.334	0.003862	0.013375	0.001155	-0.01945	0.00055
0.335	1.00465	1.03333	0.985749	1.01127	1.01487			0.335	0.011458	0.014955	-0.01146	-0.00523	0.007237
0.336	1.01458	1.03474	1.00368	1.03115	1.01801			0.336	0.023098	0.016719	0.010641	0.018551	0.011002
0.337	1.00852	1.02024	0.989028	1.01777	1.01606			0.337	0.016008	-0.00123	-0.0074	0.002584	0.008694
0.338	1.00659	1.02426	0.992258	1.02509	0.988112			0.338	0.013756	0.00376	-0.00341	0.011349	-0.02458
0.339	0.992879	0.996592	0.995739	1.00269	0.978482			0.339	-0.0023	-0.03049	0.000897	-0.01543	-0.03602
0.34	0.980763	1.01795	0.994311	1.02164	1.01172			0.34	-0.01649	-0.00404	-0.00085	0.007247	0.003587
0.341	1.00797	1.02743	0.990172	1.00767	1.01682			0.341	0.015374	0.00771	-0.00594	-0.00944	0.009678
0.342	0.98896	1.01879	0.992412	1.01877	1.005			0.342	-0.00688	-0.00299	-0.00317	0.003845	-0.00439
0.343	0.982608	1.04068	1.00685	1.02476	1.01576			0.343	-0.01431	0.024132	0.014643	0.011033	0.00845
0.344	0.990514	1.01069	0.986042	1.02166	1.01568			0.344	-0.00505	-0.01299	-0.01099	0.007341	0.008369
0.345	0.98376	1.0109	1.0055	0.999473	1.00978			0.345	-0.01296	-0.01272	0.013007	-0.01917	0.001369
0.346	0.986177	1.01048	0.985125	1.01938	1.0169			0.346	-0.01011	-0.01323	-0.01209	0.004648	0.009871
0.347	0.996755	1.03159	1.00526	0.997474	0.993065			0.347	0.002283	0.012923	0.012728	-0.02153	-0.0185
0.348	1.0028	1.02452	1.00334	1.02193	0.997792			0.348	0.009369	0.004165	0.010376	0.007724	-0.01285
0.349	1.00102	1.0226	0.996072	0.989963	1.01257			0.349	0.007283	0.001795	0.001438	-0.03048	0.004771
0.35	0.9868	1.02913	0.978673	1.00708	1.01549			0.35	-0.00937	0.009899	-0.01999	-0.01	0.008268
0.351	0.991026	1.00917	1.01236	1.0141	1.00479			0.351	-0.00441	-0.0148	0.021536	-0.00159	-0.00446
0.352	1.00475	1.01564	0.996592	1.02144	1.00273			0.352	0.011662	-0.00679	0.002118	0.007208	-0.0069
0.353	1.0114	1.02302	0.985603	1.01286	1.00847			0.353	0.019459	0.002357	-0.01141	-0.00304	-3.64e-05
0.354	0.996918	1.02527	0.997419	1.01642	1.00144			0.354	0.00251	0.005151	0.003157	0.001227	-0.0084
0.355	0.979662	1.02813	0.986326	1.01686	1.02119			0.355	-0.0177	0.008708	-0.0105	0.001777	0.015153
0.356	0.978347	1.02323	0.988046	1.00224	0.994467			0.356	-0.01924	0.002651	-0.00836	-0.01569	-0.01666
0.357	1.00096	1.04156	1.00174	1.00596	0.999597			0.357	0.007249	0.025351	0.008515	-0.01122	-0.01053
0.358	0.998788	1.03049	1.00948	0.991845	1.02489			0.358	0.004713	0.011666	0.018071	-0.02808	0.019606
0.359	1.00493	1.02534	0.998409	1.00619	1.01096			0.359	0.011921	0.00529	0.004442	-0.01092	0.003039
0.36	0.985656	1.03519	0.980807	1.01608	1.01534			0.36	-0.01065	0.01749	-0.01723	0.000912	0.008277
0.361	0.978449	1.01875	0.987827	0.992088	1.0127			0.361	-0.01909	-0.00285	-0.00857	-0.02774	0.005158
0.362	1.01019	1.01379	0.979841	1.00127	1.0052			0.362	0.018102	-0.00899	-0.0184	-0.01675	-0.00377
0.363	1.00511	1.02836	1.00118	1.01468	0.999572			0.363	0.012156	0.009065	0.007912	-0.00071	-0.01044
0.364	0.978116	1.01689	0.998271	1.01273	1.00254			0.364	-0.01946	-0.00513	0.004339	-0.00302	-0.00689
0.365	0.989319	1.0095	0.98295	1.01441	1.02267			0.365	-0.00633	-0.01427	-0.01452	-0.00099	0.017098
0.366	0.992196	1.02889	1.00132	1.00482	1.0079			0.366	-0.00297	0.009749	0.008127	-0.01245	-0.00048
0.367	0.993622	1.0202	1.00614	1.02047	1.00961			0.367	-0.00128	-0.001	0.014074	0.006277	0.001588
0.368	0.988823	1.03711	1.00669	1.017	1.00522			0.368	-0.0069	0.019945	0.01476	0.002152	-0.00362
0.369	1.00187	1.02216	1.00057	1.01885	1.01406			0.369	0.00838	0.001446	0.007234	0.00438	0.006929
0.37	0.989122	1.02385	0.975135	1.03274	1.01489			0.37	-0.00654	0.003544	-0.02409	0.020997	0.007932
0.371	0.996875	1.01838	1.00162	1.00955	1.01182			0.371	0.002547	-0.00322	0.008563	-0.00671	0.004289
0.372	0.994373	1.02458	0.998207	1.01384	1.01666			0.372	-0.00038	0.004471	0.004366	-0.00157	0.010068
0.373	0.994604	1.02267	0.979468	1.01039	1.00263			0.373	-0.00011	0.002115	-0.01871	-0.00568	-0.00662
0.374	0.998446	1.00504	0.967019	1.01613	1.00536			0.374	0.004401	-0.01971	-0.03405	0.001209	-0.00335
0.375	0.996124	1.02842	1.0039	1.01451	0.987272			0.375	0.001691	0.009246	0.011416	-0.00072	-0.02487
0.376	0.994433	1.01408	0.980499	1.02776	0.999085			0.376	-0.00029	-0.0085	-0.01741	0.015134	-0.01078
0.377	0.980242	1.02498	0.982308	1.01898	1.01681			0.377	-0.0169	0.005013	-0.01516	0.004659	0.010344
0.378	0.982505	1.01418	0.982252	1.01278	0.997481			0.378	-0.01425	-0.00835	-0.01522	-0.00274	-0.01265
0.379	0.984477	1.0297	0.983558	1.02423	1.00405			0.379	-0.01193	0.010875	-0.0136	0.010968	-0.00481
0.38	0.996465	1.03403	0.98695	1.00272	1.01291			0.38	0.002113	0.016249	-0.00941	-0.01473	0.005764
0.381	0.99632	1.04775	0.984354	1.01486	1.01186			0.381	0.001944	0.033248	-0.01259	-0.0002	0.004531
0.382	0.983948	1.00246	0.970882	1.01117	0.982932			0.382	-0.01254	-0.02283	-0.02918	-0.00461	-0.02991
0.383	0.993494	1.04449	0.983023	1.01219	1.0061			0.383	-0.00135	0.029223	-0.01421	-0.00336	-0.00229
0.384	1.00024	1.01373	0.991154	0.997742	1.01071			0.384	0.006552	-0.00886	-0.00417	-0.02062	0.003222
0.385	0.989208	1.02471	0.983071	1.01107	1.00267			0.385	-0.00636	0.004751	-0.01412	-0.00467	-0.00634
0.386	0.99112	1.00313	0.985847	1.0028	1.02033			0.386	-0.00412	-0.02196	-0.01069	-0.01454	0.014711
0.387	0.985946	1.02231	0.9848	1.01127	1.01788			0.387	-0.01017	0.001794	-0.01197	-0.0044	0.011817
0.388	0.99965	1.02347	0.993629	1.02916	0.997448			0.388	0.005886	0.003238	-0.00107	0.016995	-0.01251
0.389	1.00987	1.00686	0.99776	1.01213	0.988372			0.389	0.017862	-0.01732	0.004026	-0.00335	-0.02329
0.39	0.982573	1.02584	0.994035	1.00979	1.00539			0.39	-0.01411	0.006201	-0.00055	-0.00612	-0.00301
0.391	0.962415	1.02278	0.992891	1.01438	1.01473			0.391	-0.03771	0.00242	-0.00194	-0.00062	0.00813
0.392	1.00179	1.02876	0.983761	1.00903	1.01962			0.392	0.008417	0.009822	-0.01318	-0.00701	0.013978
0.393	1.00449	1.01269	1.00429	0.988408	1.00145			0.393	0.011582	-0.01006	0.012136	-0.03164	-0.00764
0.394	0.988414	1.01163	1.00432	1.01955	1.01683			0.394	-0.00724	-0.01136	0.01217	0.005615	0.010698
0.395	0.993955	1.01976	0.996413	1.02554	1.01768			0.395	-0.00075	-0.00129	0.002449	0.012786	0.011725
0.396	0.972114	1.0396	0.998702	1.01812	0.979758			0.396	-0.02632	0.023287	0.005284	0.00393	-0.03342
0.397	0.991624	1.02075	0.981732	1.00574	1.00918			0.397	-0.00347	-4.95e-05	-0.01561	-0.01086	0.001644
0.398	1.00354	1.01228	0.992225	1.01502	1.02238			0.398	0.010492	-0.01053	-0.00268	0.000254	0.01739
0.399	0.99252	1.03182	1.00218	1.00298	1.01151			0.399	-0.0024	0.013685	0.009602	-0.01413	0.004453
0.4	0.959828	1.02731	0.983445	1.02912	1.02226			0.4	-0.04069	0.008111	-0.01347	0.017147	0.017282
0.401	0.975145	1.01005	0.991081	1.02664	1.01809			0.401	-0.02275	-0.01325	-0.00404	0.014194	0.012335
0.402	1.01104	1.02344	0.9758	1.02292	1.00736			0.402	0.019297	0.003344	-0.02286	0.009761	-0.00043
0.403	0.988601	1.02019	0.9854	0.996454	0.998354			0.403	-0.00697	-0.00068	-0.01102	-0.02187	-0.01114
0.404	0.983675	1.02295	0.992599	1.00917	1.00871			0.404	-0.01274	0.002752	-0.00214	-0.00664	0.001205
0.405	1.00447	1.0096	0.977155	1.00524	1.00185			0.405	0.011628	-0.01377	-0.02116	-0.01133	-0.00693
0.406	0.997959	1.0084	0.996397	1.02726	1.00123			0.406	0.004004	-0.01526	0.002566	0.015012	-0.00766
0.407	0.998711	1.00548	0.986821	1.00344	1.02416			0.407	0.004887	-0.01886	-0.00922	-0.01345	0.01968
0.408	1.00114	1.00759	0.977593	1.01396	1.0152			0.408	0.007731	-0.01624	-0.02057	-0.00086	0.009025
0.409	0.999249	1.0331	0.992631	0.998193	1.01555			0.409	0.005524	0.015366	-0.00203	-0.01969	0.009449
0.41	0.985639	1.01804	0.984524	1.0099	1.01973			0.41	-0.01041	-0.00327	-0.01201	-0.00568	0.014451
0.411	0.990275	1.01659	0.999481	1.0095	1.00531			0.411	-0.00497	-0.00506	0.006431	-0.00614	-0.00271
0.412	0.993033	1.01616	0.982722	1.00345	1.00305			0.412	-0.00174	-0.00559	-0.01421	-0.01336	-0.00538
0.413	0.994561	1.01796	0.981213	1.01986	0.994064			0.413	5.91e-05	-0.00335	-0.01605	0.00628	-0.01606
0.414	0.989233	1.02818	1.00169	1.01831	0.996835			0.414	-0.00618	0.009323	0.009192	0.004443	-0.01274
0.415	0.986791	1.0186	0.999529	1.02539	1.00398			0.415	-0.00903	-0.00254	0.006544	0.012928	-0.00422
0.416	1.00392	1.02344	0.988793	1.01418	1.02821			0.416	0.01103	0.003459	-0.00667	-0.00046	0.024664
0.417	1.00311	0.999895	0.998702	1.01427	1.00879			0.417	0.010089	-0.02568	0.005554	-0.00035	0.001551
0.418	1.01349	1.02573	1.01464	1.02963	1.00656			0.418	0.022249	0.006315	0.025205	0.018032	-0.00109
0.419	0.997387	1.02445	0.984597	1.01163	1.00974			0.419	0.003393	0.004746	-0.01181	-0.00347	0.002727
0.42	0.972106	1.02972	0.982325	1.0103	1.00411			0.42	-0.0262	0.011271	-0.01459	-0.00504	-0.00396
0.421	0.982292	1.02437	0.977707	1.00313	0.993821			0.421	-0.01427	0.004664	-0.02027	-0.0136	-0.0162
0.422	1.00857	1.03246	0.978916	1.00115	0.997171			0.422	0.016517	0.014685	-0.01877	-0.01595	-0.01219
0.423	0.998933	1.00137	0.995228	1.02903	1.00257			0.423	0.00523	-0.0238	0.001344	0.017403	-0.00574
0.424	1.01335	1.00605	0.989336	1.02179	1.00175			0.424	0.022121	-0.018	-0.0059	0.008759	-0.00669
0.425	1.01025	1.01526	1.00732	1.01604	0.991394			0.425	0.018485	-0.00658	0.016269	0.001902	-0.01902
0.426	0.990634	1.02741	0.995666	1.02915	1.0049			0.426	-0.00447	0.008473	0.001924	0.017586	-0.00292
0.427	1.00275	1.04477	0.99031	1.01249	0.993686			0.427	0.009715	0.029966	-0.00466	-0.00232	-0.01625
0.428	0.985946	1.01378	0.981424	1.01416	1.00395			0.428	-0.00996	-0.00839	-0.0156	-0.0003	-0.00401
0.429	1.01255	1.03017	0.996689	1.01693	0.996356			0.429	0.021215	0.01192	0.003221	0.003024	-0.01303
0.43	0.991009	1.03276	0.976587	1.03056	1.00844			0.43	-0.00402	0.015133	-0.02153	0.019345	0.001378
0.431	0.995714	1.01871	0.97128	1.00609	0.994895			0.431	0.001496	-0.00225	-0.02806	-0.00991	-0.01472
0.432	0.985485	1.01046	0.991438	1.0102	1.01507			0.432	-0.01048	-0.01246	-0.00321	-0.00497	0.00932
0.433	0.97909	1.01638	0.994108	1.02568	1.01965			0.433	-0.01796	-0.00513	9.92e-05	0.013549	0.014794
0.434	0.994228	1.00354	0.997866	1.02754	1.01584			0.434	-0.00022	-0.021	0.004735	0.015798	0.01028
0.435	0.977135	1.01699	1.00403	1.03046	0.99869			0.435	-0.02023	-0.00434	0.012346	0.019302	-0.01013
0.436	1.00624	1.02882	0.990075	1.00503	1.00492			0.436	0.013858	0.010313	-0.00484	-0.01109	-0.00269
0.437	0.991137	1.02311	0.971044	1.0399	1.00727			0.437	-0.00383	0.003241	-0.02827	0.030609	0.000123
0.438	1.00096	1.03392	0.994124	1.0123	0.995895			0.438	0.007681	0.01664	0.000178	-0.00237	-0.01341
0.439	1.00348	1.02054	0.988671	1.01245	0.983687			0.439	0.010641	8.63e-05	-0.00653	-0.00217	-0.02793
0.44	0.991692	1.01938	0.990253	0.998076	1.01368			0.44	-0.00316	-0.00134	-0.00457	-0.01934	0.007817
0.441	0.985306	1.01394	1.0045	1.02093	1.00039			0.441	-0.01063	-0.00807	0.01301	0.007998	-0.00799
0.442	0.974829	1.02181	0.989564	0.997758	1.02064			0.442	-0.0229	0.001692	-0.00539	-0.01969	0.01614
0.443	1.00047	1.02162	0.976238	1.00565	1.01009			0.443	0.007136	0.001458	-0.0218	-0.01024	0.003594
0.444	0.991855	1.03271	0.994254	1.0185	0.983284			0.444	-0.00295	0.015193	0.000414	0.005139	-0.02832
0.445	0.99334	1.01981	0.995675	1.00666	1.02243			0.445	-0.0012	-0.00076	0.002175	-0.009	0.018333
0.446	1.00023	1.01526	0.98609	1.00887	0.994686			0.446	0.00687	-0.00639	-0.00961	-0.00634	-0.01469
0.447	0.991385	1.03897	0.984021	1.00092	0.997716			0.447	-0.00349	0.022987	-0.01216	-0.01583	-0.01106
0.448	0.992	1.01544	0.983128	1.01518	1.00693			0.448	-0.00276	-0.00615	-0.01324	0.001235	-6.66e-05
0.449	0.997003	1.00643	0.988241	1.00741	0.998338			0.449	0.003109	-0.01729	-0.00693	-0.00804	-0.01029
0.45	0.983897	1.03452	0.997346	1.0245	1.00407			0.45	-0.01224	0.017492	0.004299	0.012413	-0.00344
0.451	0.992205	1.03562	0.996113	1.01309	1.00021			0.451	-0.0025	0.018875	0.002793	-0.00121	-0.00802
0.452	1.00898	1.02474	0.980523	1.00116	1.00015			0.452	0.017156	0.005402	-0.0164	-0.01546	-0.00807
0.453	0.991829	1.03018	0.976108	1.03646	1.0226			0.453	-0.00294	0.012156	-0.02182	0.026758	0.018689
0.454	1.00384	1.01526	0.988241	1.01515	0.99147			0.454	0.011139	-0.00631	-0.00686	0.001292	-0.01838
0.455	0.980371	1.03403	0.994133	1.00396	0.998657			0.455	-0.01635	0.016943	0.000403	-0.01206	-0.0098
0.456	0.99644	1.02051	0.981351	1.01776	1.01679			0.456	0.002481	0.000212	-0.01533	0.004442	0.011827
0.457	1.0175	1.02893	0.998012	1.01871	1.01695			0.457	0.027146	0.010643	0.005214	0.005595	0.01203
0.458	1.00704	1.00962	0.990765	0.99831	1.02097			0.458	0.014906	-0.01327	-0.0037	-0.01878	0.016838
0.459	0.989148	1.02105	1.0091	0.997382	1.00437			0.459	-0.00604	0.000905	0.018896	-0.01987	-0.00292
0.46	0.984776	1.03049	1.00277	1.00842	1.01077			0.46	-0.01116	0.012602	0.01111	-0.00666	0.004731
0.461	0.983521	1.0339	0.988062	1.0187	0.993359			0.461	-0.01262	0.016831	-0.007	0.005651	-0.01599
0.462	1.00862	1.01964	0.996665	1.01549	1.02316			0.462	0.016779	-0.00081	0.003621	0.001829	0.019525
0.463	0.970304	1.02062	0.983104	1.00897	1.00841			0.463	-0.02809	0.000399	-0.01308	-0.00596	0.001972
0.464	0.988482	1.02583	0.998969	1.01087	0.99958			0.464	-0.00679	0.006864	0.006486	-0.00366	-0.00852
0.465	0.973788	1.03791	1.01496	0.990147	1.00952			0.465	-0.02401	0.021835	0.026197	-0.02843	0.003331
0.466	0.972012	1.02219	0.990529	1.013	0.99058			0.466	-0.02608	0.002382	-0.00389	-0.00109	-0.0192
0.467	0.986125	1.02153	1.00128	1.02156	1.00578			0.467	-0.00954	0.001573	0.009369	0.009165	-0.00108
0.468	1.01605	1.01303	1.00727	1.0235	1.00717			0.468	0.025518	-0.00894	0.016761	0.011498	0.000596
0.469	0.998019	1.00917	0.99862	1.00094	0.991185			0.469	0.004404	-0.01371	0.006114	-0.01546	-0.01843
0.47	0.985656	1.02429	0.984475	1.01551	1.00152			0.47	-0.01008	0.00502	-0.0113	0.001972	-0.0061
0.471	0.99743	1.0083	0.992339	1.01224	1.01787			0.471	0.003721	-0.01477	-0.0016	-0.00192	0.013401
0.472	0.988311	1.0058	0.980182	1.00972	0.996936			0.472	-0.00696	-0.01787	-0.01656	-0.00492	-0.01152
0.473	1.01953	1.00273	1.00486	1.00381	0.997179			0.473	0.029609	-0.02166	0.013857	-0.01196	-0.01121
0.474	1.00063	1.01556	0.977358	1.02254	1.01676			0.474	0.007482	-0.00576	-0.02002	0.010449	0.01213
0.475	0.995227	1.02327	1.00063	1.006	0.982226			0.475	0.001162	0.00379	0.008663	-0.00932	-0.02899
0.476	0.982522	0.997157	0.998491	1.00181	1.00596			0.476	-0.01371	-0.02853	0.006051	-0.0143	-0.0007
0.477	0.981942	1.0344	0.990594	1.03548	1.01578			0.477	-0.01439	0.017597	-0.00367	0.025962	0.011011
0.478	0.998446	1.01324	0.993849	1.00658	1.01212			0.478	0.004947	-0.00859	0.000355	-0.00857	0.006667
0.479	0.989857	1.02168	0.98863	1.00028	1.00646			0.479	-0.00511	0.00186	-0.00606	-0.01609	-5.18e-05
0.48	1.01446	1.02046	1.01204	1.01659	1.02059			0.48	0.023719	0.000365	0.022797	0.003427	0.016797
0.481	1.00257	1.01505	0.989393	1.00616	1.00588			0.481	0.009793	-0.00632	-0.0051	-0.00903	-0.0007
0.482	0.998736	1.0262	1.0051	1.01008	0.989128			0.482	0.005304	0.007489	0.014277	-0.00432	-0.02063
0.483	0.977519	1.02711	1.00079	1.01536	1.0011			0.483	-0.01953	0.008626	0.008964	0.002001	-0.00635
0.484	0.998548	1.01343	1.00975	1.00096	1.00134			0.484	0.0051	-0.0083	0.020025	-0.0152	-0.00606
0.485	0.988678	1.02041	0.991146	1.00958	1.00165			0.485	-0.00645	0.000352	-0.00289	-0.00488	-0.00566
0.486	0.996422	1.02046	0.988785	1.0038	1.00933			0.486	0.002617	0.000414	-0.00578	-0.01177	0.0035
0.487	0.997387	1.0088	0.996275	1.00897	1.00007			0.487	0.00375	-0.01402	0.003462	-0.00558	-0.00751
0.488	0.982488	1.01614	0.992834	1.03561	0.99613			0.488	-0.01369	-0.00491	-0.00077	0.026289	-0.01218
0.489	0.995073	1.02707	0.995317	1.016	1.00807			0.489	0.001052	0.008636	0.002305	0.002866	0.002062
0.49	0.998873	1.00547	0.991463	1.01681	1.00757			0.49	0.005513	-0.0181	-0.00243	0.003852	0.001492
0.491	0.992298	1.00204	0.993508	1.02844	1.01888			0.491	-0.00218	-0.02234	9.47e-05	0.017767	0.014976
0.492	1.01031	1.02888	1.00459	1.02451	1.00504			0.492	0.018913	0.0109	0.013764	0.013084	-0.00149
0.493	0.98283	1.00839	0.978981	1.02625	0.998892			0.493	-0.01326	-0.01446	-0.01778	0.015191	-0.0088
0.494	1.01023	1.01825	1.00548	1.02566	1.00679			0.494	0.018833	-0.00224	0.014889	0.014496	0.000637
0.495	0.98972	1.01379	0.983656	1.02374	1.02867			0.495	-0.00519	-0.00776	-0.01198	0.012223	0.026711
0.496	0.991983	1.0321	0.985871	1.01802	1.01764			0.496	-0.00253	0.014926	-0.00925	0.005389	0.01359
0.497	0.995569	1.03127	0.990757	1.02336	0.998312			0.497	0.001676	0.013905	-0.00322	0.01179	-0.00941
0.498	0.988917	1.00952	1.01311	1.01538	1.00322			0.498	-0.00611	-0.01301	0.024346	0.002269	-0.00355
0.499	1.0077	1.00771	0.996088	1.00829	0.990311			0.499	0.015898	-0.01524	0.003378	-0.0062	-0.01891
0.5	0.988619	1.00949	0.994546	1.03847	1.01335			0.5	-0.00645	-0.01304	0.001493	0.029904	0.008554
0.501	0.985716	1.01789	0.999619	1.00929	1.00493			0.501	-0.00984	-0.00262	0.007762	-0.00496	-0.00145
0.502	0.988567	1.02011	0.984337	1.02163	0.998606			0.502	-0.00649	0.000135	-0.01106	0.009801	-0.00896
0.503	0.98756	1.00761	0.990115	1.02095	1.00473			0.503	-0.00767	-0.01534	-0.00392	0.009009	-0.00165
0.504	0.983274	1.01641	0.989409	1.01505	0.984737			0.504	-0.01269	-0.00442	-0.00478	0.001958	-0.02545
0.505	0.987628	1.0135	0.985904	1.0128	0.996197			0.505	-0.00758	-0.00802	-0.0091	-0.0007	-0.01177
0.506	0.991223	1.01767	0.990416	1.0009	0.989195			0.506	-0.00337	-0.00285	-0.00352	-0.01493	-0.0201
0.507	0.981011	1.01216	0.982357	1.01214	1.01937			0.507	-0.01532	-0.00966	-0.01344	-0.00146	0.015859
0.508	0.985861	1.02215	0.999984	1.01552	1.02241			0.508	-0.00963	0.002715	0.0083	0.002593	0.019501
0.509	0.97424	1.03775	0.967181	1.01726	1.02095			0.509	-0.02324	0.022043	-0.03211	0.004693	0.017775
0.51	0.994971	1.00405	0.996997	0.97633	1.01014			0.51	0.001048	-0.01968	0.004642	-0.04423	0.004929
0.511	0.997285	1.03146	0.97752	1.02089	1.00414			0.511	0.003761	0.01428	-0.01935	0.009059	-0.00221
0.512	0.990821	1.01488	0.996941	1.01591	1.00514			0.512	-0.00381	-0.00624	0.004598	0.003114	-0.001
0.513	0.98487	1.00833	0.968098	1.0053	1.00462			0.513	-0.01077	-0.01434	-0.03093	-0.00954	-0.0016
0.514	0.995082	1.02498	1.01474	1.01911	1.00402			0.514	0.001193	0.006273	0.026551	0.006984	-0.00229
0.515	0.99019	1.02785	1.01247	1.02952	1.00276			0.515	-0.00452	0.009837	0.023772	0.019436	-0.00376
0.516	0.988149	1.01581	0.984759	1.02639	0.99278			0.516	-0.00692	-0.00505	-0.01036	0.015706	-0.01564
0.517	0.991829	1.02528	0.988022	1.0088	1.00456			0.517	-0.0026	0.006675	-0.00633	-0.0053	-0.00159
0.518	0.998403	1.01133	0.995983	1.01629	1.0199			0.518	0.005112	-0.01059	0.0035	0.003676	0.016701
0.519	1.00019	1.00486	0.993435	1.01179	0.988103			0.519	0.007198	-0.01858	0.00037	-0.00169	-0.02115
0.52	0.992529	1.02666	1.00476	0.996688	1.00211			0.52	-0.00176	0.008412	0.014328	-0.01973	-0.00446
0.521	0.992077	1.0313	0.97171	1.01171	1.00598			0.521	-0.00229	0.014172	-0.02638	-0.00176	0.000171
0.522	0.990044	1.0307	0.999959	0.983849	1.00572			0.522	-0.00466	0.013442	0.008451	-0.03506	-0.00012
0.523	0.996533	1.02727	1.00391	1.00716	1.01415			0.523	0.00294	0.009193	0.01333	-0.00717	0.009943
0.524	0.990301	1.00929	0.987608	0.997324	1.0018			0.524	-0.00435	-0.01307	-0.00674	-0.01891	-0.00475
0.525	0.997797	1.02999	0.989458	1.0015	0.998816			0.525	0.004431	0.012578	-0.00445	-0.01391	-0.00828
0.526	0.998847	1.01922	0.996348	1.01378	1.01744			0.526	0.005671	-0.00074	0.004046	0.000789	0.013922
0.527	0.992495	1.02347	0.982471	1.02108	1.01589			0.527	-0.00176	0.004524	-0.01304	0.009531	0.012103
0.528	0.992358	1.03532	0.986155	1.0155	0.998237			0.528	-0.00192	0.019205	-0.00849	0.002881	-0.00891
0.529	0.996286	1.02294	0.981919	1.01894	1.03392			0.529	0.002683	0.00388	-0.01369	0.007007	0.03361
0.53	0.980507	1.02834	0.991308	0.987839	1.00822			0.53	-0.01578	0.010586	-0.00211	-0.03016	0.003018
0.531	0.993596	1.02353	0.986975	0.995433	1.00571			0.531	-0.00045	0.004637	-0.00743	-0.02106	4.76e-05
0.532	1.00819	1.01643	0.993321	1.00406	1.0172			0.532	0.016644	-0.00415	0.000399	-0.01073	0.013754
0.533	1.00161	1.01142	0.993646	1.01412	1.0107			0.533	0.008936	-0.01034	0.00081	0.00131	0.006029
0.534	0.998164	1.01469	1.00717	1.01788	1.00241			0.534	0.004912	-0.00628	0.017476	0.005827	-0.00383
0.535	0.992717	1.01667	0.99393	1.0053	0.999312			0.535	-0.00147	-0.00383	0.001179	-0.0092	-0.0075
0.536	0.978193	1.02426	0.977602	1.01337	1.00517			0.536	-0.01847	0.005585	-0.01892	0.000458	-0.0005
0.537	0.989746	1.01308	0.993207	1.01228	1.01891			0.537	-0.00494	-0.00824	0.000317	-0.00082	0.015878
0.538	0.976315	1.01479	0.96986	1.02395	0.998883			0.538	-0.02065	-0.00612	-0.02844	0.013148	-0.00795
0.539	0.980208	1.02811	0.985538	1.0017	0.997196			0.539	-0.01609	0.010388	-0.00911	-0.01344	-0.00994
0.54	0.971218	1.03037	0.990862	1.0173	1.02273			0.54	-0.02662	0.013189	-0.00253	0.005228	0.020488
0.541	1.01076	1.01744	0.987868	1.01026	0.99016			0.541	0.019697	-0.00281	-0.00621	-0.00317	-0.01829
0.542	0.996055	1.01765	1.00286	1.01072	1.02086			0.542	0.002484	-0.00254	0.012269	-0.00261	0.018306
0.543	0.975589	1.01995	0.981034	1.00146	1.01376			0.543	-0.02148	0.000316	-0.0146	-0.01366	0.009857
0.544	0.99334	1.02594	1.01811	1.01701	1.00052			0.544	-0.00068	0.00774	0.031101	0.004948	-0.00589
0.545	0.992862	1.03433	0.984646	1.01056	1.006			0.545	-0.00124	0.018142	-0.01013	-0.00276	0.000663
0.546	1.00172	1.02709	0.979533	0.998704	0.989254			0.546	0.009142	0.009177	-0.01641	-0.01692	-0.01928
0.547	0.974095	1.0321	0.991	1.01902	0.999295			0.547	-0.02321	0.015397	-0.00227	0.007391	-0.00729
0.548	0.983948	1.02044	0.978486	1.01201	1.0117			0.548	-0.01167	0.000972	-0.01768	-0.00097	0.007495
0.549	0.99106	1.02289	0.994644	1.02067	0.983905			0.549	-0.00333	0.004009	0.002243	0.009399	-0.02559
0.55	0.967512	1.0328	0.986115	0.994856	0.983687			0.55	-0.03091	0.016302	-0.00825	-0.02145	-0.02583
0.551	0.980934	1.04048	1.00988	1.00813	1.00795			0.551	-0.01518	0.02581	0.021051	-0.00556	0.003096
0.552	1.00147	1.01534	0.981619	1.00085	0.999505			0.552	0.008876	-0.00531	-0.01376	-0.01425	-0.00695
0.553	0.990659	1.01097	1.00323	1.00141	0.998002			0.553	-0.00378	-0.0107	0.012875	-0.01358	-0.00872
0.554	0.987022	1.02356	0.978324	1.02068	0.985543			0.554	-0.00804	0.004881	-0.0178	0.009492	-0.02354
0.555	0.967102	1.01497	0.97511	0.997842	0.995844			0.555	-0.03136	-0.00573	-0.02175	-0.01781	-0.01125
0.556	0.987261	1.01345	1.01006	1.02062	0.989161			0.556	-0.00774	-0.00761	0.02133	0.00944	-0.01919
0.557	0.974693	1.01558	0.999708	1.00524	0.998816			0.557	-0.02246	-0.00497	0.008585	-0.00893	-0.00768
0.558	0.989361	1.02663	1.00545	1.01521	1.01792			0.558	-0.00527	0.008732	0.015678	0.003011	0.015099
0.559	0.975734	1.02982	0.990375	1.01455	1.01825			0.559	-0.02122	0.012678	-0.00289	0.002233	0.015516
0.56	1.02083	1.01057	0.988379	1.01963	1.00411			0.56	0.031592	-0.01114	-0.00534	0.008328	-0.00132
0.561	0.96939	1.02008	0.973747	0.997717	0.999076			0.561	-0.02865	0.000635	-0.02335	-0.01786	-0.00729
0.562	1.00423	1.0051	0.987372	1.01496	1.0039			0.562	0.012164	-0.0179	-0.00656	0.002769	-0.00152
0.563	0.998796	1.01974	0.999399	1.01896	1.00657			0.563	0.005806	0.000241	0.00828	0.007574	0.001683
0.564	1.00003	1.01194	0.987243	1.01094	1.00918			0.564	0.007253	-0.0094	-0.00668	-0.002	0.004799
0.565	0.984623	1.01176	0.990262	0.991285	1.01477			0.565	-0.01079	-0.00962	-0.00295	-0.02549	0.011472
0.566	0.98026	1.00216	0.985514	1.00841	1.01619			0.566	-0.01589	-0.0215	-0.00879	-0.005	0.013191
0.567	0.984196	1.01937	0.969762	1.0012	0.976736			0.567	-0.01128	-0.00018	-0.02819	-0.0136	-0.03379
0.568	0.984247	1.03547	0.980694	1.00958	1.01358			0.568	-0.01121	0.019766	-0.0147	-0.00355	0.010117
0.569	0.976443	1.01009	1.0048	1.02499	0.99665			0.569	-0.02035	-0.01165	0.015018	0.014879	-0.01003
0.57	0.998318	1.02084	0.984118	1.0063	1.00871			0.57	0.005277	0.001664	-0.01046	-0.00746	0.004347
0.571	1.01102	1.0069	0.971491	1.00457	1.0086			0.571	0.020167	-0.01559	-0.026	-0.0095	0.004244
0.572	0.972737	1.03428	0.980239	1.01592	1.01502			0.572	-0.02466	0.018322	-0.01521	0.004071	0.011909
0.573	0.995517	1.03256	0.994498	1.01663	0.998312			0.573	0.002012	0.016209	0.002374	0.00494	-0.00798
0.574	0.996781	1.01713	0.999099	0.994957	1.01374			0.574	0.003505	-0.00289	0.008056	-0.02095	0.010428
0.575	1.00776	1.03002	0.977358	1.03817	0.996423			0.575	0.016366	0.013078	-0.01873	0.030735	-0.01018
0.576	0.996286	1.0275	0.992274	1.01464	0.999983			0.576	0.002929	0.009967	-0.00033	0.002608	-0.00593
0.577	0.995441	1.02461	0.98622	0.997432	1.02101			0.577	0.001943	0.006397	-0.00778	-0.01795	0.019145
0.578	1.00791	1.01558	0.98958	0.999958	1.00808			0.578	0.016565	-0.00477	-0.00362	-0.01491	0.003752
0.579	0.997234	1.02167	0.975492	1.01122	0.994241			0.579	0.004058	0.002777	-0.02097	-0.00144	-0.01271
0.58	1.00233	1.02452	0.978957	1.01849	1.00491			0.58	0.010029	0.006318	-0.01669	0.007278	2.04e-05
0.581	0.983274	1.02249	1.00108	1.00851	1.01595			0.581	-0.01228	0.003809	0.01058	-0.00464	0.013193
0.582	1.01212	1.02491	0.990586	1.01877	1.00814			0.582	0.021515	0.006818	-0.00234	0.007645	0.003897
0.583	0.97909	1.0139	0.993094	1.02449	1.00024			0.583	-0.01717	-0.00681	0.000764	0.014497	-0.00549
0.584	0.999454	1.01468	0.991325	1.01863	0.997196			0.584	0.006686	-0.00583	-0.0014	0.00751	-0.0091
0.585	1.00461	1.0243	0.991568	1.0183	1.01321			0.585	0.012725	0.00609	-0.00109	0.007128	0.010009
0.586	0.995432	1.03396	0.988906	1.01688	0.998103			0.586	0.00198	0.018063	-0.00436	0.005444	-0.00798
0.587	0.988456	1.02964	1.00555	1.00749	1.01869			0.587	-0.00618	0.012722	0.016172	-0.00577	0.016563
0.588	0.985084	1.02096	0.990822	1.02243	1.00502			0.588	-0.01012	0.001983	-0.00197	0.01212	0.0003
0.589	1.00517	1.01895	0.994595	1.00491	0.988951			0.589	0.013402	-0.00049	0.0027	-0.00881	-0.01882
0.59	0.99083	1.01669	0.98579	0.999448	0.99953			0.59	-0.00338	-0.00329	-0.00814	-0.01533	-0.0062
0.591	0.997737	1.01525	0.968691	1.01987	1.01386			0.591	0.004715	-0.00506	-0.0292	0.009108	0.010886
0.592	1.00375	1.01368	0.98118	0.999406	1.01008			0.592	0.011756	-0.00699	-0.01379	-0.01535	0.006396
0.593	1.00313	1.01568	0.989921	1.01807	0.983234			0.593	0.011044	-0.00451	-0.00301	0.006987	-0.02556
0.594	0.98703	1.01648	0.990521	1.01047	0.994769			0.594	-0.00781	-0.00352	-0.00226	-0.00208	-0.0118
0.595	0.975734	1.01906	0.99436	0.984953	0.991344			0.595	-0.02103	-0.00031	0.002482	-0.03259	-0.01586
0.596	0.999718	1.01531	0.992583	1.00094	1.00761			0.596	0.007061	-0.00493	0.000303	-0.01344	0.003534
0.597	0.9979	1.02828	1.00483	0.999088	1.02173			0.597	0.00493	0.011136	0.015408	-0.01565	0.020369
0.598	1.0047	1.0277	0.995098	1.00481	1.01494			0.598	0.012908	0.01042	0.003426	-0.00879	0.012301
0.599	0.992435	0.997779	0.988728	1.01039	1.01261			0.599	-0.00146	-0.02662	-0.00441	-0.00211	0.009549
0.6	0.975435	1.01724	1.00343	1.01306	0.995198			0.6	-0.02136	-0.00251	0.013723	0.001094	-0.01117
0.601	1.00482	1.02332	0.990968	1.01705	1.00282			0.601	0.013062	0.005024	-0.00162	0.005885	-0.00207
0.602	0.980208	1.04255	0.993995	1.00218	0.99984			0.602	-0.01576	0.028844	0.002121	-0.01188	-0.00561
0.603	0.981557	1.04053	0.989101	1.01742	1.01063			0.603	-0.01418	0.026345	-0.00389	0.006367	0.007259
0.604	1.00707	1.01035	0.989539	1.00161	1.00928			0.604	0.01571	-0.01101	-0.00334	-0.01253	0.005669
0.605	0.991539	1.00908	0.988955	0.989202	0.990966			0.605	-0.00247	-0.01258	-0.00405	-0.02735	-0.01612
0.606	0.986544	1.02207	0.969194	1.00967	0.983956			0.606	-0.00832	0.003523	-0.02839	-0.00286	-0.02445
0.607	0.982676	1.00529	0.981018	1.00916	1.00071			0.607	-0.01285	-0.01724	-0.01381	-0.00345	-0.00447
0.608	1.00109	1.03013	0.996462	1.00281	1.00994			0.608	0.008733	0.013526	0.005242	-0.01103	0.006539
0.609	0.993101	1.02682	1.00641	1.00607	1.01672			0.609	-0.00063	0.009432	0.017507	-0.00711	0.01463
0.61	0.983282	1.01622	0.999197	1.02679	0.988851			0.61	-0.01212	-0.00369	0.008639	0.017679	-0.01854
0.611	0.979397	1.02372	0.994757	1.01032	1.00517			0.611	-0.01666	0.005612	0.003173	-0.002	0.000911
0.612	0.978202	1.01994	0.98437	1.01007	1.01057			0.612	-0.01806	0.000936	-0.00961	-0.00229	0.007363
0.613	0.985417	1.03067	0.994863	1.01602	0.972496			0.613	-0.0096	0.014245	0.00333	0.004839	-0.03797
0.614	0.984025	1.01874	1.00272	1.01076	1.01188			0.614	-0.01122	-0.00053	0.013025	-0.00142	0.008965
0.615	0.979944	1.01556	0.992225	1.01663	1.00615			0.615	-0.01601	-0.00445	0.000113	0.005603	0.002155
0.616	0.994254	1.02792	0.981051	1.01117	1.01231			0.616	0.000757	0.010854	-0.01365	-0.0009	0.009505
0.617	0.993946	1.01403	0.998125	1.00815	1.01259			0.617	0.000405	-0.00633	0.007401	-0.0045	0.009868
0.618	0.978185	1.02815	0.990862	1.03116	0.988145			0.618	-0.01805	0.011163	-0.00153	0.023031	-0.01924
0.619	0.998472	1.00583	0.994498	1.00962	1.00185			0.619	0.005718	-0.01646	0.002956	-0.00271	-0.0029
0.62	1.00079	1.03222	0.992485	1.00984	0.994828			0.62	0.008439	0.01621	0.000496	-0.00243	-0.01123
0.621	0.99953	1.00369	1.00368	0.998971	0.993132			0.621	0.006963	-0.0191	0.014304	-0.01541	-0.01324
0.622	0.992828	1.00915	0.987048	1.00313	1.00683			0.622	-0.00087	-0.01233	-0.00618	-0.01042	0.003096
0.623	0.996704	1.00907	1.02085	1.02074	1.00907			0.623	0.003672	-0.01242	0.035485	0.01065	0.005785
0.624	1.00114	1.00482	1.00489	1.00113	1.01563			0.624	0.008872	-0.01767	0.015837	-0.01278	0.013617
0.625	0.9868	1.02828	0.984216	1.01494	0.992259			0.625	-0.00792	0.011394	-0.00963	0.003746	-0.0142
0.626	0.98154	1.01463	0.988087	1.0098	1.0095			0.626	-0.01407	-0.0055	-0.00485	-0.00239	0.006352
0.627	1.00008	1.03668	0.965704	0.987948	0.99864			0.627	0.007643	0.021806	-0.03242	-0.0285	-0.00656
0.628	0.986305	1.02478	0.991544	1.01028	0.99456			0.628	-0.00849	0.007083	-0.00057	-0.00178	-0.0114
0.629	0.97862	1.01657	0.991511	0.994237	0.989178			0.629	-0.01748	-0.00307	-0.00059	-0.02095	-0.01779
0.63	0.982727	1.00964	1.00502	1.0077	0.994568			0.63	-0.01267	-0.01165	0.016074	-0.00484	-0.01136
0.631	0.991863	1.0234	0.99186	1.01888	0.995584			0.631	-0.00196	0.005408	-0.00014	0.008549	-0.01012
0.632	0.981037	1.02478	0.992623	0.995007	0.994702			0.632	-0.01464	0.00711	0.000819	-0.01998	-0.01116
0.633	1.00544	1.02848	0.98945	0.992548	1.00309			0.633	0.013955	0.011714	-0.00308	-0.02291	-0.00115
0.634	0.981344	1.00713	1.00218	1.0118	0.99984			0.634	-0.01427	-0.01472	0.012616	0.000135	-0.005
0.635	1.02075	1.01545	0.987178	1.02168	0.981059			0.635	0.031894	-0.0044	-0.00586	0.01196	-0.02735
0.636	0.983103	1.01762	0.985741	1.03414	0.993653			0.636	-0.01219	-0.0017	-0.00761	0.026877	-0.01234
0.637	1.00043	1.02849	0.971872	1.01018	1.01538			0.637	0.008108	0.011758	-0.02468	-0.00176	0.013564
0.638	0.976409	1.01134	0.983006	1.04097	0.993409			0.638	-0.02002	-0.00947	-0.01096	0.035079	-0.01259
0.639	0.992222	1.01885	0.973146	1.02629	0.993686			0.639	-0.0015	-0.00016	-0.0231	0.017533	-0.01224
0.64	1.0044	1.02646	0.994198	1.0137	0.989228			0.64	0.012771	0.009268	0.002858	0.002502	-0.01752
0.641	1.01303	1.01131	0.984256	1.01088	0.998338			0.641	0.022878	-0.00948	-0.00938	-0.00085	-0.00665
0.642	1.00131	1.02107	0.995123	1.00666	1.01112			0.642	0.009157	0.002618	0.00402	-0.00589	0.008578
0.643	0.990975	1.01325	0.99772	1.00924	1.00141			0.643	-0.00294	-0.00706	0.007238	-0.00278	-0.00296
0.644	1.00249	1.04323	1.00355	1.02798	0.992763			0.644	0.010548	0.030071	0.014439	0.019626	-0.01324
0.645	0.989063	1.01242	0.979614	1.01225	1.0006			0.645	-0.00517	-0.00807	-0.01505	0.000843	-0.00389
0.646	1.003	1.02243	0.975759	1.01513	1.00672			0.646	0.011155	0.004333	-0.01978	0.004299	0.003418
0.647	0.996943	1.02277	0.997768	1.00232	1.00373			0.647	0.004079	0.004769	0.007344	-0.01099	-0.00013
0.648	0.994484	1.02344	0.987632	1.02845	1.01397			0.648	0.001199	0.00561	-0.00513	0.020269	0.012093
0.649	0.988004	1.02921	0.981229	1.01694	1.01114			0.649	-0.00639	0.01276	-0.013	0.00652	0.008748
0.65	1.01381	1.02585	0.985019	0.995191	1.00047			0.65	0.023848	0.008612	-0.00833	-0.01947	-0.00395
0.651	0.991564	1.02855	0.98945	1.00854	0.978977			0.651	-0.00221	0.011956	-0.00285	-0.0035	-0.02953
0.652	0.972396	1.02406	0.993321	1.03315	1.01051			0.652	-0.02465	0.00641	0.001936	0.025932	0.008049
0.653	0.994245	1.03358	1.00272	0.997616	1.00646			0.653	0.000944	0.018207	0.013524	-0.01653	0.003245
0.654	0.988644	1.01724	0.994376	1.02618	0.992175			0.654	-0.0056	-0.00202	0.003259	0.017638	-0.01376
0.655	0.992478	1.01785	0.998945	1.02935	1.00275			0.655	-0.00111	-0.00125	0.008903	0.02144	-0.00113
0.656	0.989063	1.02151	1.01053	1.0095	0.997532			0.656	-0.00511	0.003288	0.023197	-0.00227	-0.00733
0.657	1.00195	1.04944	0.988728	1.02016	1.0126			0.657	0.009999	0.037883	-0.00366	0.010485	0.01063
0.658	1.00218	1.03675	0.978259	1.00974	1.0039			0.658	0.010264	0.022182	-0.01655	-0.00195	0.000287
0.659	1.00026	1.00984	1.00168	1.0196	0.994333			0.659	0.008026	-0.01113	0.012325	0.009851	-0.01108
0.66	0.991872	1.0155	1.00135	1.00997	1.00181			0.66	-0.0018	-0.00412	0.011926	-0.00165	-0.00216
0.661	0.987005	1.02965	0.972789	1.01339	1.00396			0.661	-0.00749	0.013422	-0.02325	0.002461	0.00042
0.662	0.991342	1.01477	0.982511	1.00192	0.99257			0.662	-0.00241	-0.00499	-0.01126	-0.01123	-0.01313
0.663	0.998839	1.00071	0.996324	1.04197	1.01969			0.663	0.006382	-0.0224	0.00577	0.036663	0.019188
0.664	0.987039	1.02705	1.00419	1.01218	0.992561			0.664	-0.00744	0.010221	0.015472	0.001059	-0.0131
0.665	0.989199	1.02186	0.991795	0.994555	1.00531			0.665	-0.00491	0.003815	0.000219	-0.02	0.002107
0.666	0.982599	1.03579	0.983899	1.02071	1.00765			0.666	-0.01263	0.021066	-0.0095	0.01129	0.004901
0.667	1.01483	0.99874	0.995244	1.01818	0.996969			0.667	0.025134	-0.0248	0.004493	0.008278	-0.0078
0.668	0.973241	1.00865	0.986707	0.994028	1.00023			0.668	-0.02357	-0.01252	-0.00602	-0.02058	-0.00389
0.669	0.991103	1.02239	0.972456	1.01782	1.00479			0.669	-0.00265	0.004507	-0.02356	0.007889	0.001556
0.67	0.991752	1.02583	1.0014	1.02444	0.998413			0.67	-0.00189	0.008768	0.012108	0.015809	-0.00602
0.671	0.986817	1.01353	0.982398	1.00907	0.984518			0.671	-0.00766	-0.00645	-0.01129	-0.00255	-0.02255
0.672	1.00587	1.03533	0.971823	1.02212	0.984317			0.672	0.014655	0.020543	-0.0243	0.013077	-0.02277
0.673	0.97792	1.01879	0.998418	0.999783	1.00444			0.673	-0.01807	8.82e-05	0.008478	-0.01362	0.001212
0.674	0.995893	1.01708	0.988971	1.03055	1.00139			0.674	0.002985	-0.00202	-0.00314	0.023179	-0.00239
0.675	0.991223	1.01173	0.985149	0.986894	0.98896			0.675	-0.00248	-0.00865	-0.00785	-0.029	-0.01719
0.676	0.963157	1.0031	0.986788	1.01173	0.998707			0.676	-0.03534	-0.01932	-0.00581	0.000704	-0.00556
0.677	0.997883	1.00942	0.975151	1.00884	0.983578			0.677	0.005328	-0.01149	-0.02014	-0.00273	-0.02355
0.678	0.988209	1.0155	0.982195	0.999389	1.00606			0.678	-0.00599	-0.00395	-0.01144	-0.01402	0.003244
0.679	0.994134	1.01842	0.981984	1.02716	0.99435			0.679	0.000952	-0.00032	-0.01169	0.019207	-0.01069
0.68	0.980994	1.01885	1.00034	0.988818	1.01068			0.68	-0.01443	0.000222	0.010939	-0.02662	0.008775
0.681	1.01347	1.00686	0.993589	1.00707	0.997515			0.681	0.023605	-0.01462	0.002636	-0.00479	-0.00688
0.682	1.00203	1.00792	0.991268	1.00003	0.978557			0.682	0.010221	-0.01329	-0.00021	-0.01318	-0.02945
0.683	1.00197	1.02548	0.972505	0.998896	1.01555			0.683	0.010157	0.008458	-0.02332	-0.01453	0.014637
0.684	1.0079	1.01369	0.982528	1.01182	1.01798			0.684	0.017097	-0.00613	-0.01096	0.000937	0.017548
0.685	0.989421	1.02335	0.985222	1.01748	0.999429			0.685	-0.00454	0.00583	-0.00763	0.007729	-0.00453
0.686	0.999906	1.0147	0.990042	1.01055	0.995617			0.686	0.007748	-0.00487	-0.00167	-0.00055	-0.00905
0.687	0.97763	1.0229	0.973617	1.01059	1.00034			0.687	-0.01833	0.005308	-0.0219	-0.00048	-0.0034
0.688	1.00895	1.01173	0.980913	0.990632	0.995659			0.688	0.018346	-0.00853	-0.0129	-0.02432	-0.00896
0.689	0.99416	1.01812	0.993508	1.00221	1.01305			0.689	0.001033	-0.00059	0.002631	-0.01047	0.011768
0.69	0.989506	1.03099	0.986561	1.0129	0.993443			0.69	-0.00441	0.015344	-0.00591	0.002322	-0.01157
0.691	0.985519	1.00634	0.994936	1.01337	1.00679			0.691	-0.00907	-0.01517	0.004426	0.002903	0.00436
0.692	0.994399	1.01076	1.00065	1.016	0.997943			0.692	0.001332	-0.00969	0.011474	0.006068	-0.00617
0.693	1.00859	1.01987	0.999635	1.0062	0.996004			0.693	0.017953	0.001594	0.010236	-0.00563	-0.00846
0.694	1.00583	1.01554	0.991211	1.01603	1.01117			0.694	0.014732	-0.00375	-0.00013	0.006138	0.009626
0.695	0.994279	1.04155	0.97929	1.00171	1.02536			0.695	0.001202	0.028468	-0.01481	-0.01097	0.026553
0.696	1.01073	1.02307	0.995171	1.01859	1.00491			0.696	0.020479	0.005596	0.004774	0.00923	0.002211
0.697	0.99696	1.01988	1.00959	0.9978	0.997364			0.697	0.004355	0.001654	0.022563	-0.01561	-0.00677
0.698	0.995799	1.01202	0.996762	1.00436	1.01516			0.698	0.003004	-0.00807	0.006759	-0.00776	0.014463
0.699	1.00934	1.01765	0.990854	1.0257	0.987684			0.699	0.018871	-0.00109	-0.00051	0.017775	-0.01825
0.7	0.98043	1.01711	1.00459	0.996253	0.997775			0.7	-0.01498	-0.00174	0.016436	-0.01742	-0.00621
0.701	0.994203	1.00744	0.987105	1.02842	1.00243			0.701	0.001143	-0.01372	-0.0051	0.021058	-0.00065
0.702	0.973361	1.00993	0.986731	1.01655	0.981143			0.702	-0.02326	-0.01062	-0.00555	0.006883	-0.02599
0.703	0.995927	1.019	0.986415	1.0109	0.98681			0.703	0.003176	0.000625	-0.00593	0.000138	-0.01922
0.704	0.991137	1.02357	0.991576	1.00906	1.00899			0.704	-0.00243	0.006287	0.000451	-0.00204	0.00722
0.705	0.979892	1.01264	0.992802	1.04194	1.00722			0.705	-0.01559	-0.00724	0.001973	0.037279	0.005134
0.706	0.980003	1.01626	0.998913	1.00308	1.0187			0.706	-0.01546	-0.00275	0.00951	-0.00916	0.018817
0.707	0.993801	1.0315	0.996535	1.00017	1.01426			0.707	0.000707	0.016128	0.0066	-0.01262	0.013543
0.708	0.981822	1.00594	0.975881	0.994405	0.995122			0.708	-0.01332	-0.01552	-0.01885	-0.01951	-0.00922
0.709	0.992	1.01715	0.984475	0.99867	1.00853			0.709	-0.00139	-0.00162	-0.00824	-0.01439	0.006766
0.71	0.989592	1.03824	0.97692	1.01142	1.01438			0.71	-0.0042	0.0245	-0.01753	0.000868	0.013752
0.711	0.997174	1.03237	0.978908	1.00558	0.988708			0.711	0.004681	0.01724	-0.01507	-0.00609	-0.01681
0.712	0.996081	1.0216	0.994725	1.01427	1.00469			0.712	0.003404	0.00392	0.004428	0.004316	0.002245
0.713	0.995739	1.0273	0.9823	0.991737	0.983234			0.713	0.003013	0.010979	-0.01086	-0.02261	-0.02329
0.714	0.99007	1.00877	0.992988	1.01096	0.979884			0.714	-0.00363	-0.01195	0.002317	0.000387	-0.02726
0.715	1.00215	1.02265	0.996202	1.01895	0.996667			0.715	0.010532	0.005244	0.00629	0.009964	-0.00725
0.716	0.989336	1.0162	1.0074	1.00493	0.986794			0.716	-0.00447	-0.00273	0.020098	-0.0068	-0.01899
0.717	0.992811	1.02578	0.988671	1.01839	1.00326			0.717	-0.0004	0.009139	-0.00296	0.009323	0.000637
0.718	0.996431	1.03554	0.989653	1.00761	0.997582			0.718	0.003848	0.021234	-0.00174	-0.00356	-0.0061
0.719	1.01568	1.01708	0.983712	1.0035	0.987406			0.719	0.026398	-0.00161	-0.00905	-0.00845	-0.01821
0.72	0.98096	1.01435	0.980986	1.01139	0.988666			0.72	-0.01426	-0.00499	-0.0124	0.001001	-0.01668
0.721	0.995526	1.03664	0.994514	0.998796	1.00012			0.721	0.002803	0.022628	0.004285	-0.01405	-0.00303
0.722	0.991522	1.04061	0.99423	1.01855	0.998724			0.722	-0.00188	0.027541	0.003945	0.009585	-0.00467
0.723	0.996277	1.00754	0.99604	1.00994	0.993149			0.723	0.003691	-0.0134	0.006187	-0.0007	-0.01129
0.724	0.977929	1.02714	0.989515	1.00542	1.00144			0.724	-0.0178	0.010882	-0.00183	-0.00608	-0.00139
0.725	1.00809	1.02012	0.974339	1.01639	1.00217			0.725	0.017541	0.002208	-0.02052	0.007055	-0.00052
0.726	0.987842	1.00187	0.988387	1.00491	0.99236			0.726	-0.00617	-0.02039	-0.0032	-0.00666	-0.01218
0.727	0.993204	1.01952	0.994676	1.0285	0.995844			0.727	0.000111	0.001481	0.00456	0.021558	-0.008
0.728	0.981506	1.01429	0.966443	1.00606	0.995895			0.728	-0.01359	-0.00498	-0.03021	-0.00524	-0.00793
0.729	1.01662	1.0258	0.991592	1.01904	0.991655			0.729	0.027557	0.009274	0.000792	0.010291	-0.01296
0.73	0.985092	1.00212	0.987437	0.993761	0.999715			0.73	-0.00937	-0.02003	-0.00432	-0.01993	-0.00334
0.731	1.0009	1.00158	0.997306	1.01337	1.00452			0.731	0.009149	-0.02069	0.007853	0.003533	0.002399
0.732	0.988362	1.00655	0.989913	1.00855	1.00649			0.732	-0.00553	-0.01453	-0.00124	-0.00221	0.004773
0.733	1.00309	1.02866	0.984759	1.02355	0.990018			0.733	0.011725	0.012859	-0.00758	0.015747	-0.01484
0.734	0.988106	1.0212	0.993597	1.01878	1.01117			0.734	-0.00582	0.003627	0.003321	0.010048	0.01038
0.735	0.993195	1.03087	0.999018	1.00179	0.993586			0.735	0.000146	0.015614	0.010017	-0.01024	-0.01054
0.736	1.00328	1.02625	0.981099	1.01705	0.989245			0.736	0.01196	0.009894	-0.01206	0.008005	-0.0157
0.737	0.99492	1.00943	1.00034	1.02451	1.01514			0.737	0.002178	-0.01093	0.011669	0.016948	0.01516
0.738	0.980686	1.02568	0.989231	1.0175	0.993989			0.738	-0.01449	0.009211	-0.00201	0.008585	-0.01001
0.739	1.01011	1.02918	0.996876	1.01328	0.998522			0.739	0.01998	0.013553	0.007429	0.003558	-0.00458
0.74	1.00318	1.01571	0.98622	1.0102	0.996062			0.74	0.011876	-0.00312	-0.0057	-0.0001	-0.0075
0.741	0.975623	1.01073	0.991885	0.994689	1.0051			0.741	-0.0204	-0.00928	0.001306	-0.01864	0.003281
0.742	1.00396	1.01079	0.988281	1.01035	0.994442			0.742	0.012793	-0.00919	-0.00313	9.61e-05	-0.0094
0.743	0.996303	1.01164	0.995731	0.997198	0.994081			0.743	0.003826	-0.00813	0.006069	-0.01561	-0.0098
0.744	0.992614	1.01356	0.974542	1.01965	0.986584			0.744	-0.00049	-0.00574	-0.02004	0.011252	-0.01872
0.745	0.997635	1.02249	0.984548	1.01258	1.00706			0.745	0.005394	0.00533	-0.00768	0.002814	0.005697
0.746	0.987116	1.00619	0.976749	1.00156	0.98095			0.746	-0.00692	-0.01485	-0.01728	-0.01035	-0.02539
0.747	0.989771	1.01283	0.994311	0.996805	0.997448			0.747	-0.0038	-0.00661	0.004365	-0.01601	-0.00572
0.748	0.99293	1.0293	0.991114	1.00969	0.996323			0.748	-9.81e-05	0.013781	0.000441	-0.00059	-0.00704
0.749	0.980584	1.0265	0.987088	0.999415	0.99932			0.749	-0.01455	0.010326	-0.0045	-0.01286	-0.00345
0.75	1.00178	1.02214	0.98566	1.01219	0.987549			0.75	0.010288	0.004935	-0.00625	0.00242	-0.01745
0.751	0.992256	1.02601	0.992144	1.00013	1.01548			0.751	-0.00087	0.009744	0.001753	-0.01197	0.015836
0.752	1.00493	1.02571	0.983217	1.00307	1.00055			0.752	0.013975	0.009386	-0.00924	-0.00845	-0.00194
0.753	0.993075	1.01415	0.984232	1.0136	0.990681			0.753	9.5e-05	-0.00492	-0.00798	0.00416	-0.01367
0.754	0.988841	1.03504	0.974502	1.03367	1.03464			0.754	-0.00486	0.020949	-0.01995	0.028171	0.038712
0.755	0.986501	1.03222	0.967336	1.00414	1.00231			0.755	-0.00759	0.017463	-0.02877	-0.00712	0.000219
0.756	1.00347	1.00877	0.993094	0.998528	0.990698			0.756	0.012287	-0.01156	0.002978	-0.01381	-0.01359
0.757	0.999146	1.01743	0.984597	1.02454	0.99503			0.757	0.007226	-0.00083	-0.00747	0.017301	-0.00841
0.758	0.997413	1.01061	0.983972	0.994053	0.992192			0.758	0.005202	-0.00927	-0.00823	-0.01914	-0.01177
0.759	0.979226	1.01888	0.993589	1.02012	1.01352			0.759	-0.01609	0.000989	0.003634	0.012044	0.013653
0.76	0.986125	1.01379	0.979379	1.01793	0.992889			0.76	-0.00801	-0.00532	-0.01386	0.009444	-0.0109
0.761	0.972618	1.02711	0.984337	0.985071	0.989363			0.761	-0.02382	0.011193	-0.00774	-0.02982	-0.01508
0.762	0.994937	1.01138	0.97821	1.01147	1.01696			0.762	0.002324	-0.00827	-0.01528	0.001763	0.017805
0.763	1.0009	1.00766	0.988436	1.01286	0.992293			0.763	0.009317	-0.01287	-0.00266	0.003433	-0.01156
0.764	1.01323	1.01593	0.984435	0.993016	0.988607			0.764	0.023766	-0.00262	-0.00759	-0.02028	-0.01592
0.765	1.00028	1.01955	0.987738	1.01792	1.00259			0.765	0.008603	0.001876	-0.0035	0.009516	0.00075
0.766	0.991573	1.01731	0.999002	0.987897	1.00354			0.766	-0.00159	-0.00089	0.010392	-0.02636	0.001897
0.767	0.980644	1.02878	0.988257	1.00453	1.00538			0.767	-0.01439	0.013325	-0.00283	-0.00646	0.004107
0.768	0.988089	1.0066	0.987892	1.01685	0.990412			0.768	-0.00566	-0.01414	-0.00328	0.00828	-0.0137
0.769	0.987107	1.00833	0.988582	1.00181	0.979985			0.769	-0.0068	-0.01199	-0.00241	-0.00968	-0.02611
0.77	0.983709	1.00336	0.997825	1.00272	0.974015			0.77	-0.01078	-0.01813	0.008993	-0.00858	-0.03319
0.771	1.00165	1.02868	0.980815	1.01655	1.00322			0.771	0.010236	0.01323	-0.01196	0.00797	0.001617
0.772	1.00306	1.02808	0.990586	1.00915	0.998892			0.772	0.011891	0.012501	9.26e-05	-0.00086	-0.00353
0.773	1.01426	1.00524	0.983623	1.01284	1.01922			0.773	0.02501	-0.01577	-0.00847	0.003567	0.0207
0.774	0.993716	1.02336	1.015	1.01595	1.00951			0.774	0.000961	0.006675	0.030207	0.007299	0.00916
0.775	0.981728	1.0203	0.988963	1.02052	1.00099			0.775	-0.01308	0.002898	-0.00186	0.01277	-0.00097
0.776	0.988832	1.01814	0.997971	0.991862	0.999043			0.776	-0.00475	0.000223	0.009244	-0.02147	-0.00328
0.777	0.997276	1.01841	0.980905	1.01243	0.977961			0.777	0.005149	0.000576	-0.01177	0.003134	-0.02837
0.778	0.974872	1.02613	0.989474	1.01018	0.99456			0.778	-0.02109	0.010129	-0.0012	0.000458	-0.00857
0.779	0.981626	1.0405	0.980685	1.0077	0.997893			0.779	-0.01317	0.027946	-0.01201	-0.00248	-0.00459
0.78	0.989728	1.01295	0.984987	1.0105	0.985224			0.78	-0.00368	-0.00616	-0.0067	0.000878	-0.01965
0.781	0.985212	1.01571	0.984597	0.999172	0.999866			0.781	-0.00897	-0.00274	-0.00716	-0.01265	-0.0022
0.782	0.999898	1.0249	1.00049	1.03302	1.00206			0.782	0.008244	0.008647	0.012435	0.027834	0.000444
0.783	1.0036	1.02546	0.986561	1.0022	1.0012			0.783	0.012588	0.009352	-0.00473	-0.009	-0.00057
0.784	1.00972	1.03024	0.987007	1.00821	0.982772			0.784	0.019751	0.015274	-0.00416	-0.00181	-0.0225
0.785	0.996798	1.03459	0.983607	0.996989	0.984518			0.785	0.004626	0.020677	-0.00834	-0.0152	-0.0204
0.786	0.985272	1.0252	0.969811	1.01561	1.00164			0.786	-0.00886	0.009058	-0.02533	0.007076	8.8e-06
0.787	0.977075	1.01248	0.96921	1.00549	0.989766			0.787	-0.01846	-0.00668	-0.02605	-0.00501	-0.01411
0.788	0.996038	1.01775	0.982804	1.021	0.988767			0.788	0.003757	-0.00015	-0.00929	0.013554	-0.01529
0.789	0.983393	1.01833	0.995926	1.00844	0.99885			0.789	-0.01105	0.000586	0.006893	-0.00145	-0.00326
0.79	1.00872	1.02441	0.987835	0.998093	1.00114			0.79	0.018614	0.008127	-0.00306	-0.0138	-0.00051
0.791	1.0058	1.0155	0.991722	1.00432	0.995198			0.791	0.015202	-0.00291	0.001737	-0.00634	-0.00757
0.792	1.00041	1.01052	1.0086	1.01491	1.00259			0.792	0.00889	-0.00907	0.02255	0.006338	0.00125
0.793	0.99772	1.03559	0.996583	1.01948	1.01265			0.793	0.005745	0.021995	0.007752	0.011816	0.013256
0.794	0.993272	1.0117	0.988363	1.0135	1.00501			0.794	0.000546	-0.00758	-0.00236	0.004684	0.004179
0.795	0.986492	1.03119	0.993021	1.00834	1.01327			0.795	-0.00739	0.016558	0.003391	-0.00147	0.014033
0.796	0.996644	1.01277	0.996429	1.00105	0.965729			0.796	0.004509	-0.00624	0.0076	-0.01017	-0.04257
0.797	0.987269	1.02067	0.995707	0.996621	0.99351			0.797	-0.00647	0.003559	0.006728	-0.01545	-0.00947
0.798	0.992768	0.996317	0.988216	1.01209	0.976484			0.798	-1.97e-05	-0.0266	-0.00249	0.003061	-0.02973
0.799	0.986091	1.01573	1.01407	1.01786	1.007			0.799	-0.00784	-0.00255	0.029382	0.009974	0.006646
0.8	0.986945	1.03695	0.980012	1.01169	1.01754			0.8	-0.00683	0.023738	-0.01257	0.002618	0.019208
0.801	0.993212	1.01472	0.985149	1.00587	0.996684			0.801	0.000506	-0.00378	-0.00624	-0.00432	-0.00561
0.802	0.993818	1.02869	0.993824	1.00194	1.00097			0.802	0.001222	0.013533	0.004472	-0.00901	-0.00049
0.803	0.981609	1.02848	0.973382	1.01376	1.01298			0.803	-0.01306	0.013282	-0.02071	0.005138	0.01384
0.804	0.995295	1.01285	0.998612	1.00366	0.98739			0.804	0.002971	-0.00607	0.010396	-0.00692	-0.01663
0.805	1.00282	1.0124	0.995691	1.02841	0.992419			0.805	0.011781	-0.00662	0.006809	0.022686	-0.01061
0.806	0.98709	1.00532	0.982114	1.00228	0.969339			0.806	-0.00663	-0.01537	-0.00991	-0.00854	-0.03809
0.807	0.98154	1.03676	0.988533	1.01484	1.00887			0.807	-0.01313	0.023574	-0.00199	0.00649	0.009018
0.808	0.987679	1.02322	0.98071	1.00099	0.985408			0.808	-0.00593	0.006812	-0.01162	-0.01006	-0.01891
0.809	0.995808	1.01156	0.984759	0.998578	0.955343			0.809	0.003593	-0.00762	-0.00661	-0.01293	-0.0547
0.81	0.987987	1.02831	0.966808	1.00923	0.992687			0.81	-0.00556	0.013132	-0.02872	-0.00017	-0.01021
0.811	1.00285	1.01311	0.971661	0.996889	0.9966			0.811	0.011857	-0.00569	-0.02273	-0.01491	-0.00553
0.812	0.979303	1.03314	0.987949	1.00052	0.988918			0.812	-0.01572	0.019126	-0.00264	-0.01055	-0.01465
0.813	0.985997	1.0439	0.988712	1.01486	0.991957			0.813	-0.00788	0.032462	-0.00169	0.006616	-0.01101
0.814	0.9764	1.02953	0.997087	1.0175	0.998312			0.814	-0.01911	0.014681	0.00864	0.009781	-0.00342
0.815	0.993391	1.02517	0.998807	0.993292	0.99995			0.815	0.000794	0.009287	0.010773	-0.01915	-0.00146
0.816	1.00962	1.02131	0.972156	1.0135	0.994467			0.816	0.019811	0.004521	-0.02205	0.00503	-0.00796
0.817	0.990463	1.02036	0.982609	1.02469	0.99309			0.817	-0.00263	0.003355	-0.00916	0.018428	-0.00959
0.818	1.00413	1.00957	0.99815	1.01879	0.999589			0.818	0.013391	-0.00999	0.010003	0.011394	-0.00183
0.819	0.976144	1.0136	0.986261	1.00815	0.987818			0.819	-0.01939	-0.005	-0.00463	-0.00132	-0.01584
0.82	0.99112	1.01771	0.985287	0.995099	0.991823			0.82	-0.00184	9.47e-05	-0.00582	-0.01691	-0.01104
0.821	0.991633	1.01335	0.984305	0.991929	1.00767			0.821	-0.00123	-0.00529	-0.00702	-0.02068	0.007854
0.822	0.991761	1.03325	0.981197	1.00336	1.01473			0.822	-0.00108	0.019354	-0.01084	-0.007	0.016289
0.823	0.994245	1.02857	0.994603	1.01107	1.0084			0.823	0.001835	0.013574	0.005703	0.002234	0.008762
0.824	1.01574	1.005	0.984013	1.02405	1.00243			0.824	0.02701	-0.0156	-0.00734	0.017768	0.001671
0.825	0.985041	1.01035	0.987291	1.00501	0.978986			0.825	-0.00894	-0.00897	-0.00328	-0.00498	-0.02624
0.826	0.984179	1.01497	0.988793	1.01968	0.975988			0.826	-0.00994	-0.00323	-0.00142	0.012573	-0.02979
0.827	0.985126	1.0076	0.986366	0.999565	0.994459			0.827	-0.00883	-0.01236	-0.0044	-0.01145	-0.00777
0.828	0.979824	1.02788	0.970744	0.988884	0.985064			0.828	-0.01502	0.012764	-0.02364	-0.02422	-0.01894
0.829	0.98972	1.02043	0.967693	1.01472	0.988767			0.829	-0.00344	0.003549	-0.02739	0.006698	-0.01451
0.83	1.00243	1.01514	0.981148	1.00992	0.995315			0.83	0.011461	-0.00299	-0.01079	0.00097	-0.00669
0.831	1.00157	1.01264	1.00377	1.02406	0.971883			0.831	0.01046	-0.00607	0.017104	0.0179	-0.03458
0.832	0.975675	1.00317	0.984646	1.00677	0.981983			0.832	-0.01987	-0.01779	-0.00646	-0.00277	-0.02253
0.833	0.997772	0.998837	0.987178	1.00601	1.00489			0.833	0.006014	-0.02316	-0.00332	-0.00366	0.004761
0.834	0.991658	1.01399	0.978381	1.01169	0.99592			0.834	-0.00114	-0.00438	-0.01415	0.003153	-0.0059
0.835	0.997063	1.01578	0.976392	1.00232	0.987499			0.835	0.005202	-0.00216	-0.01659	-0.00804	-0.01592
0.836	1.00232	1.01723	0.988598	1.01236	1.0031			0.836	0.011364	-0.00035	-0.00153	0.003985	0.002688
0.837	1.0045	1.01667	0.988208	1.01381	1.00319			0.837	0.013918	-0.00104	-0.002	0.005727	0.002821
0.838	1.00467	1.01998	0.98833	1.00187	0.995844			0.838	0.014128	0.003076	-0.00183	-0.00852	-0.00592
0.839	0.989336	1.01926	0.979703	0.98937	0.985207			0.839	-0.00383	0.002192	-0.01246	-0.02346	-0.01857
0.84	1.00683	1.01849	0.994741	1.00832	0.995903			0.84	0.016663	0.001257	0.006088	-0.00078	-0.0058
0.841	0.976042	1.01953	0.979111	1.01859	0.998069			0.841	-0.01939	0.002539	-0.01316	0.011512	-0.00321
0.842	1.00883	1.02491	0.970079	1.00827	0.99995			0.842	0.019017	0.00921	-0.02428	-0.00081	-0.00094
0.843	0.998736	1.01667	0.995488	1.00696	1.00314			0.843	0.007204	-0.00098	0.007041	-0.00237	0.002868
0.844	0.988781	1.0244	0.977553	1.01449	0.987961			0.844	-0.00446	0.008601	-0.01505	0.006645	-0.0152
0.845	1.00123	1.01331	0.987421	0.999573	1.00051			0.845	0.010128	-0.00512	-0.00287	-0.01116	-0.00022
0.846	0.997498	1.00799	0.992558	1.01889	0.99759			0.846	0.00577	-0.0117	0.00347	0.011956	-0.00368
0.847	0.996662	1.01488	0.981205	1.00152	1.01364			0.847	0.004791	-0.00317	-0.01051	-0.0088	0.015446
0.848	0.981779	1.02252	0.974299	1.0052	1.00004			0.848	-0.01264	0.006318	-0.019	-0.00439	-0.00072
0.849	0.992298	1.01337	0.976766	1.02319	0.9831			0.849	-0.00031	-0.00502	-0.01595	0.017131	-0.02089
0.85	0.98376	1.02246	0.992607	1.01502	1.00616			0.85	-0.0103	0.00626	0.003583	0.007388	0.006599
0.851	0.970577	1.02588	0.999262	1.01971	1.00621			0.851	-0.02574	0.010504	0.011798	0.013005	0.00668
0.852	0.975922	1.01448	0.98536	1.01071	1.0052			0.852	-0.01948	-0.0036	-0.00532	0.002253	0.005486
0.853	0.984307	1.01046	1.01141	1.00704	0.983225			0.853	-0.00964	-0.00857	0.026791	-0.00211	-0.02066
0.854	0.987517	1.02452	0.983055	1.01734	0.985392			0.854	-0.00588	0.008839	-0.00814	0.010212	-0.01806
0.855	0.972191	1.01965	1.00624	0.996194	1.01206			0.855	-0.02383	0.002821	0.020446	-0.01505	0.013727
0.856	0.998292	1.02747	0.994417	1.01308	1.00506			0.856	0.006752	0.012512	0.005887	0.005156	0.005401
0.857	0.995663	1.00678	0.988987	1.01359	1.0054			0.857	0.003677	-0.0131	-0.00079	0.005782	0.005823
0.858	0.97804	1.01503	0.992063	1.0206	0.991143			0.858	-0.01696	-0.00287	0.003013	0.014183	-0.01114
0.859	0.984896	1.02969	0.971929	1.0178	1.02098			0.859	-0.00892	0.015293	-0.02178	0.010841	0.024424
0.86	0.97938	1.0241	0.993987	1.00697	0.995189			0.86	-0.01538	0.008374	0.005413	-0.00207	-0.00628
0.861	0.992657	1.01645	0.969113	1.01556	0.996583			0.861	0.000179	-0.00108	-0.02522	0.008193	-0.00461
0.862	0.988969	1.0211	0.98807	1.00734	1.00766			0.862	-0.00414	0.004678	-0.00186	-0.00161	0.008604
0.863	1.00591	1.02432	0.984248	1.0007	1.00334			0.863	0.015701	0.008686	-0.00655	-0.00954	0.003487
0.864	0.973036	1.00951	0.984354	1.01347	0.996642			0.864	-0.02279	-0.00965	-0.00641	0.005753	-0.00447
0.865	0.999607	1.01519	1.00228	1.01293	0.999908			0.865	0.008335	-0.0026	0.015691	0.005121	-0.00056
0.866	1.00567	1.0119	0.980182	1.00867	0.997742			0.866	0.015443	-0.00667	-0.01152	4.85e-05	-0.00313
0.867	0.996115	1.01354	0.995731	1.00338	0.996281			0.867	0.004254	-0.00463	0.007653	-0.00627	-0.00485
0.868	0.992649	1.01768	0.964398	1.01576	0.990177			0.868	0.000201	0.000499	-0.03095	0.008549	-0.0121
0.869	0.982847	1.00044	0.980677	1.00225	0.997431			0.869	-0.01127	-0.02084	-0.01088	-0.00759	-0.00344
0.87	0.969271	1.0118	0.984516	1.00039	0.993846			0.87	-0.02717	-0.00676	-0.00613	-0.00979	-0.0077
0.871	0.992905	0.99983	0.965607	1.0144	0.983016			0.871	0.000515	-0.02157	-0.02941	0.00697	-0.02057
0.872	0.978706	1.01042	0.987567	0.997524	0.980514			0.872	-0.01611	-0.00845	-0.00235	-0.01319	-0.02354
0.873	0.969194	1.01685	0.977902	1.00681	0.986055			0.873	-0.02724	-0.00048	-0.01424	-0.00208	-0.01692
0.874	0.993161	1.0187	0.981189	1.01201	1.00014			0.874	0.000836	0.00182	-0.01018	0.004163	-0.00011
0.875	0.992589	1.00736	0.976977	1.01275	0.993796			0.875	0.000169	-0.01221	-0.01535	0.005056	-0.00766
0.876	1.00063	0.992691	1.01304	1.00232	0.998875			0.876	0.009589	-0.03036	0.029099	-0.00739	-0.00159
0.877	0.991778	1.0295	0.97718	1.00396	1.00531			0.877	-0.00077	0.015223	-0.01508	-0.00542	0.006101
0.878	0.979611	1.02965	0.986715	0.99586	0.995198			0.878	-0.01502	0.015416	-0.00332	-0.01508	-0.00593
0.879	1.00533	1.00768	0.989434	0.998821	0.998934			0.879	0.015113	-0.01177	4.81e-05	-0.01153	-0.00146
0.88	1.01062	1.03401	0.973658	1.006	0.988137			0.88	0.021314	0.020835	-0.01939	-0.00294	-0.01431
0.881	1.0056	1.00716	1.0017	1.00894	1.00605			0.881	0.015445	-0.0124	0.015187	0.000604	0.007054
0.882	0.984008	1.01186	0.984183	1.00402	0.974746			0.882	-0.00984	-0.00658	-0.00638	-0.00527	-0.03021
0.883	0.998216	1.01214	0.986188	1.01073	0.983175			0.883	0.006803	-0.00622	-0.00391	0.002771	-0.02016
0.884	1.00571	1.01043	0.977626	0.990181	0.989573			0.884	0.015582	-0.00832	-0.01444	-0.02178	-0.01252
0.885	0.989037	1.01131	0.99195	1.01963	1.01389			0.885	-0.00394	-0.00723	0.003222	0.013439	0.016466
0.886	0.994928	1.00747	0.974859	1.01444	1.00995			0.886	0.002966	-0.01197	-0.01783	0.007251	0.011792
0.887	0.986808	1.00799	0.97804	1.01751	0.995936			0.887	-0.00654	-0.01131	-0.0139	0.010938	-0.00489
0.888	0.986262	1.00909	0.98652	0.991695	0.999824			0.888	-0.00717	-0.00995	-0.00343	-0.01991	-0.00024
0.889	0.993759	1.02119	0.979874	1.00662	1.00516			0.889	0.001608	0.005048	-0.01161	-0.00204	0.006143
0.89	0.976042	1.01995	0.977472	0.991795	0.98922			0.89	-0.01913	0.003517	-0.01456	-0.01976	-0.01283
0.891	0.986501	1.01171	0.970468	1.01136	0.999186			0.891	-0.00688	-0.00668	-0.02318	0.003646	-0.00094
0.892	0.981199	1.02504	0.970801	1.01745	1.00601			0.892	-0.01309	0.009844	-0.02275	0.01094	0.007213
0.893	1.00091	1.02478	1.002	1.01714	1.00128			0.893	0.010015	0.009527	0.015705	0.010589	0.001596
0.894	0.98026	1.01097	0.985092	1.01404	1.0092			0.894	-0.01417	-0.00756	-0.00511	0.006897	0.011051
0.895	0.96834	1.0136	0.990513	0.991285	0.98608			0.895	-0.02813	-0.0043	0.001578	-0.02029	-0.01647
0.896	1.00472	1.02935	0.968869	0.998277	0.972689			0.896	0.014486	0.015208	-0.02507	-0.01191	-0.0324
0.897	0.995663	1.00797	0.974566	1.01607	1.00097			0.897	0.003887	-0.01125	-0.01805	0.009369	0.001304
0.898	0.990881	1.00526	0.990245	0.998352	1.00364			0.898	-0.00171	-0.0146	0.001282	-0.01179	0.004503
0.899	0.9993	1.01547	0.981099	0.998185	0.997406			0.899	0.008153	-0.00195	-0.00997	-0.01198	-0.00291
0.9	0.978851	1.02626	0.983006	1.02338	0.985694			0.9	-0.01579	0.01143	-0.00761	0.018168	-0.01684
0.901	0.986441	1.02896	0.982982	1.00042	0.996927			0.901	-0.0069	0.014772	-0.00763	-0.00927	-0.00343
0.902	0.979944	1.02332	0.986959	1.01877	0.985685			0.902	-0.0145	0.007793	-0.00271	0.012683	-0.01681
0.903	0.992384	1.01399	0.960129	1.02032	0.989228			0.903	7.24e-05	-0.00374	-0.03576	0.014561	-0.01258
0.904	0.978808	1.01967	0.992623	1.00575	0.967106			0.904	-0.01582	0.003303	0.004296	-0.00285	-0.0389
0.905	1.00043	1.02267	1.00006	1.01679	0.992352			0.905	0.009505	0.007027	0.013479	0.010358	-0.00881
0.906	1.01195	1.01922	0.975954	1.01374	0.995214			0.906	0.023007	0.002764	-0.01623	0.006735	-0.00539
0.907	0.988192	1.0251	0.981408	1.00366	0.989044			0.907	-0.00481	0.010052	-0.00949	-0.0053	-0.01271
0.908	0.974086	1.01927	0.98183	1.00415	0.98974			0.908	-0.02133	0.002844	-0.00895	-0.00471	-0.01186
0.909	0.988977	1.02353	0.972895	1.01202	0.986819			0.909	-0.00388	0.008125	-0.01995	0.004722	-0.01532
0.91	0.988644	1.01815	0.976847	0.994145	0.994442			0.91	-0.00427	0.001472	-0.01507	-0.01663	-0.00623
0.911	0.988841	1.01234	0.980742	1.00548	1.0085			0.911	-0.00404	-0.00571	-0.01026	-0.00307	0.010531
0.912	0.997695	1.00624	0.984881	1.01564	0.979766			0.912	0.006337	-0.01326	-0.00515	0.009094	-0.02367
0.913	0.991846	1.01687	0.999375	0.996738	0.980228			0.913	-0.0005	-8.54e-05	0.012727	-0.01349	-0.0231
0.914	1.00307	1.01069	0.982771	1.0153	0.995962			0.914	0.012642	-0.00774	-0.00772	0.00872	-0.00434
0.915	0.986125	1.02645	0.998969	0.999297	0.996222			0.915	-0.00719	0.011797	0.012257	-0.0104	-0.00402
0.916	0.979141	1.00995	0.980637	1.00482	1.00873			0.916	-0.01537	-0.00863	-0.01032	-0.00377	0.010907
0.917	1.00467	1.02261	0.993143	1.01569	0.987423			0.917	0.014541	0.007068	0.005101	0.009235	-0.01446
0.918	1.00027	1.00553	0.990822	1.0158	1.01702			0.918	0.00939	-0.01408	0.002253	0.009379	0.02081
0.919	0.986988	0.999733	0.978519	1.00418	0.996239			0.919	-0.00616	-0.02125	-0.01289	-0.00449	-0.00392
0.92	0.990403	1.02602	0.997517	0.997165	1.00709			0.92	-0.00215	0.011316	0.010528	-0.01287	0.009029
0.921	0.992939	1.00904	0.976977	1.01188	0.983267			0.921	0.000822	-0.0097	-0.01477	0.004749	-0.01933
0.922	0.969271	1.02901	0.989961	0.995701	0.992419			0.922	-0.0269	0.015027	0.001245	-0.01458	-0.00841
0.923	0.989933	1.00321	0.990059	1.00183	0.986659			0.923	-0.00269	-0.0169	0.001373	-0.00724	-0.01526
0.924	0.99054	1.01768	0.999692	1.0238	0.994719			0.924	-0.00197	0.001015	0.013256	0.019048	-0.00563
0.925	1.00025	1.00055	0.988281	1.00463	0.976257			0.925	0.009402	-0.02019	-0.00079	-0.00386	-0.02761
0.926	0.992418	1.02632	0.970704	1.00862	0.990085			0.926	0.000231	0.011738	-0.02243	0.000929	-0.01112
0.927	0.997524	0.999491	0.975776	1.01598	0.968172			0.927	0.006225	-0.02148	-0.01617	0.009735	-0.0372
0.928	0.983427	1.00636	0.974761	0.995099	1.00348			0.928	-0.01029	-0.01296	-0.01741	-0.01521	0.004869
0.929	0.997712	1.03732	0.985319	1.0204	0.995147			0.929	0.006448	0.025384	-0.00439	0.015052	-0.00504
0.93	1.00943	1.03654	0.976401	1.00448	0.97839			0.93	0.020179	0.02443	-0.01536	-0.00397	-0.02498
0.931	1.00503	1.01975	0.983826	1.00458	1.00388			0.931	0.015027	0.003649	-0.0062	-0.00382	0.005407
0.932	1.0035	1.00266	0.997971	1.00402	0.998119			0.932	0.013247	-0.0175	0.011236	-0.00448	-0.00143
0.933	0.993041	1.01774	1.00997	1.02091	1.00501			0.933	0.001	0.001167	0.026029	0.015726	0.006794
0.934	0.975922	1.01261	0.999675	0.999875	0.999127			0.934	-0.01905	-0.00517	0.013367	-0.0094	-0.0002
0.935	0.975999	1.02303	0.991065	1.01925	0.997145			0.935	-0.01895	0.007739	0.002768	0.01378	-0.00255
0.936	0.985707	1.01921	0.980547	1.01777	0.99859			0.936	-0.00758	0.003033	-0.01018	0.01202	-0.0008
0.937	0.998301	1.01532	0.991244	1.01826	0.995164			0.937	0.007186	-0.00178	0.003015	0.012622	-0.00486
0.938	0.983154	1.01304	1.00308	1.02729	1.00802			0.938	-0.01055	-0.00459	0.017614	0.023441	0.010466
0.939	0.985664	1.02753	0.997574	1.00278	1.00856			0.939	-0.0076	0.01336	0.010837	-0.00585	0.011134
0.94	1.00309	1.02617	0.974331	1.03008	1.00191			0.94	0.012809	0.011684	-0.01779	0.0268	0.003225
0.941	0.989173	1.02565	0.993045	1.0128	1.00193			0.941	-0.00348	0.011044	0.005286	0.006162	0.003275
0.942	0.988286	1.01085	0.987324	1.0032	0.974208			0.942	-0.00452	-0.00728	-0.00175	-0.0053	-0.02973
0.943	1.00725	1.01334	0.983031	0.996529	1.01577			0.943	0.017691	-0.00417	-0.00703	-0.01327	0.019792
0.944	1.00837	0.99874	0.986634	1.02014	0.986987			0.944	0.01901	-0.02225	-0.00258	0.014976	-0.01448
0.945	0.98604	1.00892	0.98678	1.0173	0.997616			0.945	-0.00713	-0.00964	-0.00238	0.011596	-0.00179
0.946	0.983171	1.01241	0.984126	1.00324	1.0053			0.946	-0.01049	-0.0053	-0.00564	-0.0052	0.007374
0.947	0.984529	1.01872	0.981813	1.00959	0.986441			0.947	-0.0089	0.002517	-0.00848	0.00242	-0.01506
0.948	0.989327	1.01459	0.986739	1.01696	0.99419			0.948	-0.00327	-0.00259	-0.00239	0.011248	-0.00582
0.949	0.992999	1.01368	0.98282	1.03231	1.00145			0.949	0.001038	-0.0037	-0.00721	0.029612	0.002853
0.95	1.00429	1.01857	0.984199	1.01291	1.00049			0.95	0.014264	0.002361	-0.0055	0.006434	0.001727
0.951	0.984162	1.0033	0.976693	1.02608	0.993334			0.951	-0.00931	-0.01654	-0.01474	0.022188	-0.00678
0.952	0.997908	1.02457	0.993954	1.00625	1.00779			0.952	0.006797	0.00981	0.006549	-0.00151	0.010462
0.953	0.985015	1.0333	0.99707	0.993794	1.00977			0.953	-0.00829	0.020622	0.010398	-0.01638	0.012839
0.954	0.991146	1.02129	0.995244	0.989068	0.995592			0.954	-0.0011	0.005769	0.00816	-0.02202	-0.00403
0.955	0.993579	1.01611	0.972878	1.00938	0.997926			0.955	0.001749	-0.00064	-0.01938	0.002278	-0.00123
0.956	1.01845	1.02677	0.978981	1.01798	0.994862			0.956	0.030882	0.01257	-0.01185	0.012584	-0.00487
0.957	0.988448	1.01422	0.992834	1.00562	0.996012			0.957	-0.00425	-0.00295	0.00523	-0.00218	-0.00348
0.958	0.991419	1.0211	0.994725	1.01414	0.999547			0.958	-0.00077	0.005569	0.00757	0.008031	0.000747
0.959	1.00492	1.01954	0.981456	1.00061	0.983041			0.959	0.015052	0.00364	-0.00877	-0.00813	-0.01889
0.96	0.989822	1.02725	0.975832	1.00805	0.972932			0.96	-0.00262	0.013203	-0.01568	0.000776	-0.03092
0.961	0.997404	1.02909	0.987348	1.02627	0.98692			0.961	0.006258	0.015484	-0.00148	0.022574	-0.01423
0.962	0.993818	1.00993	0.977983	1.01147	1.01619			0.962	0.002067	-0.00822	-0.01301	0.004889	0.020652
0.963	0.99568	1.01581	0.990213	1.01198	0.986726			0.963	0.004254	-0.00094	0.002081	0.005532	-0.01442
0.964	0.985186	1.02137	0.982122	1.01061	0.994484			0.964	-0.00803	0.005961	-0.00788	0.003907	-0.00517
0.965	1.00558	1.00615	1.01104	1.01176	0.999412			0.965	0.015846	-0.01288	0.027772	0.005287	0.000719
0.966	0.983009	1.01081	0.984427	1.00264	0.978121			0.966	-0.01058	-0.0071	-0.00501	-0.00559	-0.02462
0.967	1.01707	1.01189	0.976936	1.01681	0.999001			0.967	0.029316	-0.00575	-0.01423	0.011362	0.000268
0.968	0.987363	1.01506	0.99341	1.00515	1.0043			0.968	-0.00547	-0.00182	0.006081	-0.00256	0.006598
0.969	1.00363	1.00652	0.979119	1.0045	0.99911			0.969	0.013586	-0.01238	-0.01152	-0.00333	0.000437
0.97	0.992042	1.0124	0.960697	1.00958	0.990395			0.97	2.49e-05	-0.00509	-0.03421	0.002771	-0.00992
0.971	0.97786	1.01848	0.98747	1.01007	0.993829			0.971	-0.01658	0.002439	-0.00121	0.003369	-0.00581
0.972	1.00277	1.01433	0.980426	1.0033	0.988691			0.972	0.012602	-0.00269	-0.00987	-0.00472	-0.01191
0.973	0.990856	1.02902	0.965786	1.01433	0.981697			0.973	-0.00135	0.015504	-0.0279	0.008488	-0.02023
0.974	0.986646	1.01906	0.979192	1.00539	0.98723			0.974	-0.00627	0.003192	-0.01137	-0.00219	-0.01362
0.975	0.986723	1.02873	0.986074	1.00103	1.00135			0.975	-0.00617	0.015165	-0.00287	-0.00738	0.00322
0.976	0.986843	1.0208	0.981253	0.986509	0.987768			0.976	-0.00604	0.005361	-0.0088	-0.02473	-0.01294
0.977	0.973267	1.01558	0.976441	1.00762	0.988716			0.977	-0.02193	-0.00109	-0.01472	0.000526	-0.0118
0.978	0.99422	1.02116	0.995691	1.00871	0.994333			0.978	0.002615	0.00583	0.009017	0.001845	-0.00509
0.979	0.992085	1.0128	0.987145	1.02183	0.985601			0.979	0.00012	-0.00451	-0.0015	0.017547	-0.01547
0.98	0.970867	1.01879	0.980629	0.992464	1.006			0.98	-0.02473	0.002911	-0.00952	-0.01755	0.008852
0.981	0.983914	0.998215	0.976392	1.01767	1.00868			0.981	-0.00944	-0.02256	-0.01473	0.012612	0.012061
0.982	1.00828	1.0247	0.976896	0.98732	0.980405			0.982	0.019109	0.010254	-0.01409	-0.02367	-0.0216
0.983	1.01091	1.01594	0.992242	1.02069	0.989589			0.983	0.02219	-0.00059	0.00483	0.01625	-0.01064
0.984	0.979431	1.02776	0.978283	0.989319	0.991143			0.984	-0.01467	0.014049	-0.01235	-0.02125	-0.00877
0.985	1.00129	1.01453	0.976879	0.991385	0.996818			0.985	0.010937	-0.00232	-0.01407	-0.01875	-0.002
0.986	0.986885	1.01736	0.982657	1.01454	0.974771			0.986	-0.00593	0.00119	-0.00694	0.008935	-0.02823
0.987	0.980217	1.02631	0.976401	1.01136	0.991713			0.987	-0.01373	0.012283	-0.01463	0.005153	-0.00803
0.988	0.992059	1.00132	0.990586	1.00826	0.994576			0.988	0.000136	-0.01864	0.00285	0.001475	-0.0046
0.989	0.992025	1.02044	0.966581	1.0067	0.987709			0.989	0.00011	0.005032	-0.02671	-0.00039	-0.01277
0.99	0.989336	1.01403	0.983088	1.01311	0.990555			0.99	-0.00304	-0.00289	-0.00636	0.007305	-0.00936
0.991	0.989959	1.02423	0.981919	0.999983	0.981496			0.991	-0.00231	0.009743	-0.00779	-0.00838	-0.02013
0.992	0.99007	1.01889	0.979322	1.00366	1.00353			0.992	-0.00217	0.003143	-0.01097	-0.00396	0.006126
0.993	0.981617	1.0264	0.986001	1.03008	1.00358			0.993	-0.01206	0.012453	-0.00273	0.027639	0.006221
0.994	0.98277	1.0108	0.967417	1.00493	0.993938			0.994	-0.01071	-0.00685	-0.02562	-0.00241	-0.00525
0.995	0.992316	1.02719	0.990083	0.999314	0.995307			0.995	0.000478	0.013449	0.00232	-0.00912	-0.00361
0.996	0.99749	1.00989	0.974258	1.01095	0.989287			0.996	0.006541	-0.00796	-0.01717	0.004805	-0.01075
0.997	1.00189	1.01853	0.992014	1.02348	0.985434			0.997	0.011703	0.002741	0.004727	0.019798	-0.01533
0.998	0.999479	1.00205	0.96736	1.00956	0.984308			0.998	0.008886	-0.01765	-0.02564	0.003182	-0.01664
0.999	0.996884	1.01371	0.984443	0.993359	0.99555			0.999	0.005846	-0.00321	-0.00457	-0.01617	-0.00324
1	1.00184	0.998029	1.00009	1.02625	0.983931			1	0.01165	-0.02262	0.014714	0.023164	-0.01706
2	0.990207	1.01463	0.982657	1.00256	0.991462			1.5	0.000645	0.002532	-0.00041	0.002651	0.001253
3	0.988251	1.0113	0.975995	0.996479	0.982965			2	0.000957	0.002982	-0.0023	0.003145	0.0004
4	0.985929	1.00755	0.971978	0.990373	0.974091			2.5	0.000837	0.002895	-0.00097	0.003555	-0.00097
5	0.982847	1.00334	0.965672	0.98323	0.966594			3	-0.00019	0.002219	-0.0025	0.002671	-0.0008
6	0.97944	0.999992	0.961517	0.975854	0.95918			3.5	-0.0016	0.002583	-0.00141	0.00145	-0.00058
7	0.978689	0.995905	0.956477	0.969079	0.951977			4	8.63e-05	0.002011	-0.00144	0.000894	-0.0002
8	0.976486	0.991924	0.951219	0.962856	0.943396			4.5	7.32e-05	0.001555	-0.00179	0.000954	-0.00153
9	0.973164	0.987579	0.945668	0.956608	0.935471			5	-0.00127	0.000633	-0.00253	0.000923	-0.00215
10	0.971474	0.985092	0.940425	0.95154	0.92815			5.5	-0.0007	0.001989	-0.00293	0.002255	-0.00213
11	0.968818	0.980278	0.936091	0.944205	0.92213			6	-0.00128	0.000445	-0.00224	0.000824	-0.00063
12	0.967597	0.976531	0.930541	0.936359	0.913441			6.5	-0.00018	0.000206	-0.00309	-0.00126	-0.00238
13	0.963969	0.972905	0.92473	0.931174	0.905221			7	-0.0019	9.81e-05	-0.00429	-0.00022	-0.00364
14	0.962167	0.969408	0.920697	0.925152	0.898983			7.5	-0.0015	0.000121	-0.00334	-0.00023	-0.00261
15	0.959793	0.965225	0.915608	0.917733	0.892418			8	-0.00177	-0.00072	-0.00373	-0.00196	-0.00204
16	0.957454	0.961421	0.909643	0.911377	0.883006			8.5	-0.00201	-0.0011	-0.00523	-0.00247	-0.00493
17	0.954696	0.958005	0.906722	0.906099	0.877188			9	-0.00276	-0.00103	-0.003	-0.00174	-0.00362
18	0.953193	0.954362	0.901772	0.900211	0.870346			9.5	-0.00203	-0.00125	-0.00332	-0.00179	-0.00358
19	0.951084	0.950284	0.895709	0.894281	0.863436			10	-0.00203	-0.00203	-0.00504	-0.00193	-0.0037
20	0.949283	0.947425	0.890272	0.889681	0.857181			10.5	-0.00168	-0.00132	-0.00603	-0.00054	-0.00311
21	0.94597	0.942692	0.887188	0.883441	0.848895			11	-0.00309	-0.00296	-0.00414	-0.00115	-0.00499
22	0.944203	0.940262	0.882433	0.877193	0.842321			11.5	-0.00272	-0.00175	-0.00435	-0.00181	-0.00491
23	0.942427	0.937168	0.877994	0.870987	0.836301			12	-0.00235	-0.00139	-0.0042	-0.00248	-0.00423
24	0.940813	0.933389	0.872767	0.865601	0.830156			12.5	-0.0018	-0.00189	-0.00506	-0.00221	-0.00377
25	0.937227	0.929965	0.867687	0.858525	0.822793			13	-0.00358	-0.00196	-0.00576	-0.00402	-0.00482
26	0.936091	0.926137	0.86354	0.854159	0.817411			13.5	-0.00248	-0.00257	-0.00535	-0.00262	-0.00357
27	0.932744	0.92251	0.860253	0.848639	0.810854			14	-0.00399	-0.00293	-0.00392	-0.00265	-0.00379
28	0.931796	0.919078	0.854654	0.842584	0.804154			14.5	-0.00269	-0.00308	-0.00536	-0.00337	-0.00424
29	0.929559	0.914281	0.850077	0.837892	0.798034			15	-0.00291	-0.00493	-0.00558	-0.0025	-0.00405
30	0.928663	0.911099	0.846092	0.831527	0.790335			15.5	-0.00157	-0.0048	-0.0051	-0.00367	-0.00582
31	0.925282	0.90891	0.841856	0.82522	0.785037			16	-0.00315	-0.00345	-0.00495	-0.00482	-0.00478
32	0.923198	0.904129	0.837928	0.821348	0.779429			16.5	-0.00321	-0.00534	-0.00446	-0.00311	-0.00417
33	0.921431	0.900923	0.832807	0.816363	0.774475			17	-0.00291	-0.00529	-0.00548	-0.00276	-0.00285
34	0.919809	0.89779	0.828928	0.810617	0.767348			17.5	-0.00245	-0.00516	-0.00499	-0.00337	-0.00417
35	0.917435	0.895851	0.824838	0.805314	0.76252			18	-0.00288	-0.00357	-0.0048	-0.0035	-0.00282
36	0.915036	0.892153	0.819555	0.799343	0.754779			18.5	-0.00335	-0.00418	-0.0061	-0.00446	-0.00499
37	0.912705	0.888704	0.815822	0.794391	0.750355			19	-0.00373	-0.00451	-0.00552	-0.00426	-0.00326
38	0.911347	0.886467	0.810677	0.790862	0.744083			19.5	-0.00299	-0.00333	-0.00671	-0.00239	-0.00381
39	0.909068	0.882978	0.806749	0.78489	0.737912			20	-0.00333	-0.00374	-0.00644	-0.00348	-0.00428
40	0.907129	0.879271	0.802504	0.779462	0.732724			20.5	-0.00328	-0.00443	-0.00657	-0.00396	-0.00364
41	0.904927	0.875863	0.799526	0.773799	0.727241			21	-0.00355	-0.00476	-0.00519	-0.00477	-0.00341
42	0.903031	0.87298	0.795022	0.768923	0.722246			21.5	-0.00347	-0.00445	-0.00571	-0.00467	-0.00265
43	0.902058	0.870606	0.791281	0.765109	0.715882			22	-0.0023	-0.00354	-0.00532	-0.00335	-0.00357
44	0.900726	0.867731	0.787645	0.759865	0.710794			22.5	-0.00157	-0.00327	-0.00483	-0.00379	-0.00303
45	0.89731	0.863596	0.783587	0.754169	0.705304			23	-0.00329	-0.00456	-0.00489	-0.0048	-0.00303
46	0.897234	0.862885	0.779473	0.75069	0.699511			23.5	-0.0011	-0.00165	-0.00505	-0.00319	-0.00345
47	0.894211	0.857248	0.775026	0.74604	0.694817			24	-0.00237	-0.00484	-0.00564	-0.00303	-0.00259
48	0.892742	0.854284	0.772445	0.740603	0.689285			24.5	-0.00182	-0.00473	-0.00396	-0.00385	-0.0028
49	0.890215	0.851183	0.767365	0.735158	0.683424			25	-0.00253	-0.00482	-0.0054	-0.00471	-0.00345
50	0.888012	0.849406	0.764078	0.731988	0.679243			25.5	-0.00286	-0.00327	-0.00464	-0.0029	-0.00215
51	0.887124	0.846636	0.760743	0.726978	0.672703			26	-0.00166	-0.00298	-0.00398	-0.00332	-0.00371
52	0.884776	0.842453	0.756571	0.720731	0.667783			26.5	-0.00217	-0.00445	-0.00437	-0.00527	-0.00339
53	0.882727	0.839464	0.752765	0.718715	0.66372			27	-0.00234	-0.00445	-0.00435	-0.00218	-0.00211
54	0.880012	0.835984	0.748342	0.713128	0.658649			27.5	-0.00329	-0.00508	-0.0051	-0.00342	-0.00208
55	0.87874	0.834272	0.744358	0.707624	0.652512			28	-0.00257	-0.00354	-0.00535	-0.00458	-0.00336
56	0.877425	0.831356	0.741558	0.703576	0.647877			28.5	-0.00189	-0.0035	-0.00416	-0.00404	-0.0029
57	0.875546	0.828223	0.737119	0.699679	0.643889			29	-0.00189	-0.00375	-0.00501	-0.00336	-0.00172
58	0.872985	0.825307	0.734084	0.696149	0.638432			29.5	-0.00269	-0.00374	-0.00418	-0.00227	-0.00235
59	0.870586	0.822343	0.730148	0.691374	0.634419			30	-0.00331	-0.0038	-0.00447	-0.00271	-0.00129
60	0.869331	0.81887	0.726163	0.686046	0.628693			30.5	-0.0026	-0.00452	-0.00484	-0.00385	-0.00232
61	0.868366	0.817328	0.723761	0.682299	0.624084			31	-0.00155	-0.00286	-0.0033	-0.00313	-0.00208
62	0.866769	0.813355	0.71963	0.676921	0.619349			31.5	-0.00125	-0.00421	-0.00391	-0.0044	-0.00203
63	0.864208	0.810068	0.716522	0.673124	0.615176			32	-0.00209	-0.00475	-0.00328	-0.00382	-0.00136
64	0.863021	0.808016	0.712367	0.67043	0.610164			32.5	-0.00131	-0.00375	-0.00397	-0.00195	-0.00173
65	0.861219	0.805634	0.708723	0.665763	0.605168			33	-0.00127	-0.00319	-0.00406	-0.00247	-0.00213
66	0.858675	0.802904	0.705193	0.661297	0.600391			33.5	-0.0021	-0.00307	-0.00403	-0.00279	-0.00231
67	0.8566	0.799205	0.701793	0.656329	0.596899			34	-0.00239	-0.00417	-0.00386	-0.00374	-0.00102
68	0.855951	0.79629	0.699772	0.653276	0.591727			34.5	-0.00102	-0.00431	-0.00202	-0.00244	-0.00176
69	0.855063	0.79394	0.696355	0.648843	0.586765			35	7.08e-05	-0.00376	-0.00193	-0.00282	-0.0023
70	0.850922	0.791194	0.691746	0.643959	0.582903			35.5	-0.00266	-0.00372	-0.00333	-0.00377	-0.00157
71	0.849402	0.788577	0.688581	0.641123	0.578898			36	-0.00232	-0.00353	-0.00297	-0.00231	-0.00106
72	0.848659	0.785759	0.686658	0.636732	0.572669			36.5	-0.00108	-0.00361	-0.00111	-0.00274	-0.00324
73	0.846687	0.782536	0.681691	0.632517	0.569504			37	-0.00129	-0.0042	-0.00302	-0.00299	-0.0018
74	0.84556	0.779976	0.679062	0.629121	0.565776			37.5	-0.00051	-0.00398	-0.00208	-0.0023	-0.00109
75	0.843135	0.777747	0.675824	0.625742	0.562468			38	-0.00127	-0.00338	-0.00191	-0.00162	8.18e-05
76	0.840719	0.775155	0.671547	0.621677	0.558069			38.5	-0.002	-0.00322	-0.00304	-0.00179	-8.41e-05
77	0.840147	0.772457	0.668787	0.618215	0.552821			39	-0.00059	-0.00323	-0.00233	-0.00127	-0.00131
78	0.83762	0.769445	0.665842	0.613506	0.549597			39.5	-0.00148	-0.00363	-0.00187	-0.00227	-0.00016
79	0.83534	0.766441	0.6612	0.610186	0.544678			40	-0.00209	-0.00403	-0.00353	-0.00165	-0.00107
80	0.833632	0.76376	0.658643	0.606171	0.540799			40.5	-0.00202	-0.00405	-0.00263	-0.00189	-0.00078
81	0.83248	0.763396	0.655008	0.602114	0.536618			41	-0.00131	-0.00121	-0.00309	-0.00221	-0.00088
82	0.830712	0.758365	0.651997	0.597673	0.532495			41.5	-0.00133	-0.00416	-0.00281	-0.00301	-0.00097
83	0.827963	0.755635	0.647752	0.594788	0.530237			42	-0.00252	-0.00428	-0.00406	-0.00199	0.001135
84	0.827186	0.753794	0.646211	0.591643	0.525292			42.5	-0.00138	-0.00332	-0.00201	-0.00131	-1.22e-05
85	0.824607	0.750765	0.643386	0.587018	0.520506			43	-0.00237	-0.00383	-0.00156	-0.00243	-0.001
86	0.823455	0.747381	0.638939	0.584048	0.516208			43.5	-0.00169	-0.0048	-0.00313	-0.00161	-0.00144
87	0.822797	0.745588	0.636878	0.579741	0.512816			44	-0.00044	-0.00381	-0.00179	-0.0024	-0.00084
88	0.820236	0.743788	0.633867	0.576421	0.50908			44.5	-0.00143	-0.00284	-0.00164	-0.00205	-0.0007
89	0.818297	0.741211	0.630621	0.573042	0.50641			45	-0.00168	-0.00285	-0.00179	-0.0018	0.000689
90	0.816778	0.738465	0.628129	0.569428	0.502699			45.5	-0.00146	-0.00309	-0.00104	-0.00186	0.000783
91	0.814558	0.737335	0.624421	0.565932	0.497737			46	-0.00206	-0.00133	-0.00181	-0.0018	-0.00064
92	0.811936	0.734516	0.621231	0.562595	0.494967			46.5	-0.00315	-0.00167	-0.00197	-0.0016	0.00052
93	0.812176	0.731746	0.618432	0.559291	0.490954			47	-0.00087	-0.00197	-0.00166	-0.00137	0.000155
94	0.809298	0.72812	0.615169	0.556858	0.488645			47.5	-0.00227	-0.00334	-0.00195	-0.00013	0.00178
95	0.808043	0.726327	0.613319	0.552241	0.484204			48	-0.00175	-0.00245	-0.00051	-0.00153	0.000832
96	0.806173	0.723072	0.609448	0.548025	0.480585			48.5	-0.00198	-0.0034	-0.00159	-0.00248	0.00083
97	0.804004	0.720779	0.60651	0.545223	0.477739			49	-0.00255	-0.00316	-0.00153	-0.00176	0.001715
98	0.802339	0.718905	0.603832	0.542263	0.473499			49.5	-0.00253	-0.00241	-0.00118	-0.00126	0.000906
99	0.800478	0.717524	0.601081	0.538323	0.469394			50	-0.00276	-0.00106	-0.00095	-0.00197	0.00022
100	0.79918	0.71448	0.597794	0.535714	0.465935			50.5	-0.00234	-0.00179	-0.00139	-0.0011	0.000268
101	0.798207	0.711621	0.594962	0.532636	0.461812			51	-0.00153	-0.0023	-0.00128	-0.00082	-0.0005
102	0.794476	0.709553	0.592308	0.528487	0.459596			51.5	-0.00396	-0.00185	-0.00098	-0.00186	0.000959
103	0.794092	0.707146	0.590125	0.525602	0.45628			52	-0.00248	-0.00182	-0.00012	-0.00141	0.001071
104	0.792623	0.704352	0.585248	0.522223	0.453131			52.5	-0.00227	-0.00229	-0.00261	-0.00157	0.001362
105	0.791855	0.702567	0.583706	0.518869	0.449655			53	-0.00125	-0.00151	-0.00099	-0.00173	0.001222
106	0.790642	0.699442	0.581499	0.51646	0.446264			53.5	-0.00075	-0.00242	-0.00022	-0.00078	0.001158
107	0.788192	0.697891	0.578545	0.513558	0.443056			54	-0.00171	-0.00138	-0.00039	-0.00046	0.00128
108	0.785545	0.695452	0.574812	0.510413	0.440193			54.5	-0.0029	-0.00145	-0.00154	-0.00044	0.001771
109	0.784401	0.693046	0.572661	0.507201	0.437104			55	-0.00234	-0.0015	-0.00075	-0.00054	0.001976
110	0.782488	0.690655	0.570616	0.505395	0.434442			55.5	-0.00269	-0.00154	0.000133	0.001019	0.002647
111	0.78172	0.687788	0.567232	0.500836	0.430933			56	-0.0017	-0.00217	-0.00064	-0.00073	0.002279
112	0.779969	0.686415	0.564846	0.497817	0.427407			56.5	-0.00185	-0.00098	-0.0002	-0.00067	0.001859
113	0.777681	0.683363	0.563482	0.494722	0.423419			57	-0.00265	-0.00187	0.001472	-0.00073	0.000864
114	0.776733	0.68182	0.559587	0.491636	0.42137			57.5	-0.00189	-0.0009	1.3e-05	-0.00079	0.002145
115	0.77547	0.679462	0.557737	0.48845	0.417895			58	-0.0015	-0.00097	0.001056	-0.001	0.001701
116	0.772319	0.677168	0.554783	0.485974	0.414049			58.5	-0.00332	-0.00096	0.000711	-0.00039	0.000786
117	0.772447	0.673922	0.551033	0.483707	0.411111			59	-0.00132	-0.00213	-0.00062	0.000455	0.000919
118	0.771064	0.672516	0.549151	0.480153	0.408684			59.5	-0.00108	-0.00104	0.000323	-0.00027	0.001633
119	0.768963	0.669924	0.545515	0.477434	0.405528			60	-0.00169	-0.00144	-0.00091	-2.23e-05	0.001445
120	0.766991	0.668042	0.542431	0.47449	0.402388			60.5	-0.00216	-0.00095	-0.00148	-6.25e-05	0.00125
121	0.765198	0.665167	0.541336	0.47117	0.399793			61	-0.00241	-0.00172	0.000381	-0.00057	0.001675
122	0.764916	0.663665	0.538731	0.46928	0.39662			61.5	-0.0009	-0.0008	0.000355	0.000595	0.00139
123	0.763175	0.661824	0.536126	0.465934	0.39348			62	-0.00112	-0.0003	0.000321	6.17e-06	0.001103
124	0.762116	0.659514	0.532928	0.463985	0.390541			62.5	-0.00053	-0.00041	-0.00046	0.001066	0.001043
125	0.759213	0.65722	0.530834	0.460339	0.38861			63	-0.00211	-0.00049	0.000105	6.85e-05	0.002141
126	0.757078	0.655274	0.527978	0.457587	0.385638			63.5	-0.00279	-0.00016	-0.00029	0.000117	0.001981
127	0.756241	0.652625	0.526282	0.45512	0.383052			64	-0.00196	-0.00071	0.000721	0.000482	0.002252
128	0.754466	0.650646	0.523441	0.452502	0.38003			64.5	-0.00223	-0.00044	0.000311	0.000653	0.00198
129	0.753569	0.64933	0.520439	0.449516	0.377243			65	-0.00148	0.000634	-0.00032	0.000355	0.001957
130	0.752638	0.645833	0.518694	0.445568	0.374271			65.5	-0.00077	-0.001	0.000586	-0.00111	0.001687
131	0.751204	0.644468	0.51703	0.44377	0.371769			66	-0.00066	-6.99e-06	0.001576	-3.26e-05	0.001949
132	0.74971	0.641101	0.513362	0.441662	0.368679			66.5	-0.00062	-0.0015	6.87e-05	0.000661	0.001487
133	0.747661	0.638662	0.512088	0.43891	0.366765			67	-0.00124	-0.00186	0.001502	0.000561	0.002405
134	0.745996	0.638104	0.508793	0.435883	0.364103			67.5	-0.00141	0.000101	0.000429	0.000103	0.002399
135	0.745031	0.635819	0.506659	0.434084	0.361031			68	-0.00077	-8.37e-05	0.000775	0.001101	0.001884
136	0.743605	0.633784	0.504646	0.431333	0.358697			68.5	-0.00067	3.36e-05	0.001248	0.000937	0.002216
137	0.741598	0.631611	0.501798	0.428857	0.356102			69	-0.00125	-4.3e-05	0.000682	0.001079	0.002217
138	0.739899	0.630254	0.499533	0.426707	0.353651			69.5	-0.00149	0.000893	0.000805	0.001589	0.002371
139	0.73937	0.627379	0.498422	0.423011	0.351308			70	-0.00035	-6.53e-05	0.002343	0.000236	0.002619
140	0.737918	0.625288	0.496092	0.421714	0.348168			70.5	-0.0003	-6.33e-05	0.002365	0.001725	0.001897
141	0.735417	0.62251	0.493788	0.418636	0.345893			71	-0.00148	-0.00093	0.002403	0.001063	0.002185
142	0.735152	0.621112	0.491053	0.415759	0.343282			71.5	-5.27e-05	-8.04e-05	0.001886	0.000624	0.002043
143	0.733649	0.619392	0.488172	0.414204	0.34094			72	-7.06e-05	0.000349	0.001179	0.001745	0.002198
144	0.732369	0.617236	0.487482	0.410942	0.339353			72.5	0.00016	0.000229	0.003165	0.000806	0.003228
145	0.730593	0.614958	0.483895	0.409076	0.336608			73	-0.00019	-4.61e-05	0.001552	0.001516	0.002859
146	0.72827	0.613028	0.481688	0.406199	0.334223			73.5	-0.00119	8.83e-05	0.001631	0.001	0.002893
147	0.72757	0.610484	0.479099	0.404217	0.331369			74	-0.00029	-0.00054	0.001218	0.001536	0.002349
148	0.726067	0.607932	0.476867	0.401976	0.328976			74.5	-0.00034	-0.00119	0.001238	0.001734	0.002335
149	0.724607	0.607254	0.474376	0.399726	0.325693			75	-0.00033	0.000468	0.00092	0.001909	0.001231
150	0.722541	0.60429	0.472899	0.396388	0.324602			75.5	-0.00106	-0.00071	0.001833	0.000766	0.002717
151	0.721499	0.603135	0.470756	0.394431	0.32215			76	-0.00057	0.000347	0.001917	0.001248	0.00256
152	0.72161	0.600365	0.467721	0.392031	0.319606			76.5	0.001254	-0.00061	0.000881	0.00119	0.002267
153	0.719467	0.599113	0.465749	0.38948	0.316844			77	0.00044	0.000295	0.001146	0.000932	0.001703
154	0.717828	0.596279	0.464856	0.387389	0.315887			77.5	0.000212	-0.00076	0.002726	0.001204	0.003257
155	0.716171	0.594542	0.462487	0.385398	0.313184			78	-4.5e-05	-0.00047	0.002461	0.001574	0.00271
156	0.71501	0.593258	0.460442	0.383542	0.310514			78.5	0.000271	0.000375	0.002596	0.00209	0.002187
157	0.714267	0.591263	0.457845	0.381526	0.308423			79	0.001081	0.000331	0.002028	0.002395	0.002337
158	0.711672	0.590472	0.455499	0.378716	0.305963			79.5	-0.00029	0.00176	0.001754	0.001734	0.002013
159	0.711023	0.586652	0.452789	0.376792	0.304142			80	0.000619	-0.00057	0.001019	0.002113	0.002436
160	0.709016	0.585893	0.451937	0.373764	0.302538			80.5	-7.44e-05	0.000895	0.002566	0.001156	0.003105
161	0.708239	0.582582	0.448861	0.371882	0.300372			81	0.000671	-0.00082	0.001347	0.001547	0.003075
162	0.707548	0.581806	0.446702	0.369875	0.298315			81.5	0.001524	0.000596	0.001252	0.001775	0.00316
163	0.705029	0.580546	0.444487	0.3677	0.296174			82	0.000218	0.0014	0.001074	0.001786	0.003113
164	0.704372	0.577025	0.442685	0.365442	0.293429			82.5	0.001096	-0.0006	0.001388	0.001675	0.002338
165	0.702092	0.574942	0.440729	0.36336	0.292102			83	6.26e-05	-0.00083	0.001499	0.001756	0.003229
166	0.700931	0.573956	0.439374	0.36106	0.289835			83.5	0.000348	0.000293	0.002341	0.001568	0.002979
167	0.701033	0.571937	0.436282	0.357363	0.287233			84	0.002099	0.000122	0.001029	-0.00031	0.002317
168	0.697959	0.570015	0.433758	0.355991	0.284815			84.5	0.000133	6.71e-05	0.000394	0.000568	0.001843
169	0.697148	0.56794	0.43401	0.354527	0.284269			85	0.0008	-0.0002	0.003172	0.001329	0.003594
170	0.694911	0.567601	0.431981	0.35247	0.282187			85.5	-0.0002	0.001689	0.003133	0.001367	0.003485
171	0.693204	0.565606	0.428889	0.350069	0.278803			86	-0.00058	0.001519	0.001764	0.000966	0.001817
172	0.693101	0.562779	0.427485	0.348271	0.27683			86.5	0.000919	0.000298	0.002462	0.001274	0.001799
173	0.691573	0.561648	0.425172	0.346389	0.275126			87	0.000733	0.001175	0.002028	0.001473	0.002094
174	0.689916	0.559298	0.422527	0.3448	0.273439			87.5	0.000395	0.000533	0.001164	0.00199	0.002385
175	0.689327	0.558555	0.421163	0.342977	0.272255			88	0.001311	0.001879	0.00188	0.002224	0.003252
176	0.687867	0.555761	0.420206	0.340811	0.27008			88.5	0.001197	0.000661	0.003069	0.002031	0.00293
177	0.68639	0.55497	0.417722	0.337825	0.267847			89	0.001064	0.001923	0.002374	0.000843	0.002519
178	0.684674	0.552757	0.415207	0.33601	0.265387			89.5	0.000641	0.00142	0.001629	0.001027	0.001818
179	0.683393	0.550568	0.415207	0.334839	0.262701			90	0.000722	0.000939	0.003972	0.00198	0.000828
180	0.682018	0.549284	0.412196	0.33253	0.261659			90.5	0.000694	0.001565	0.002586	0.001547	0.001784
181	0.682018	0.547249	0.41123	0.331	0.260358			91	0.002278	0.001255	0.003708	0.002035	0.002412
182	0.68049	0.545052	0.409128	0.329126	0.259057			91.5	0.002061	0.000727	0.00342	0.002096	0.00302
183	0.677374	0.543477	0.407026	0.327755	0.256488			92	-1.9e-05	0.000975	0.003117	0.002749	0.002104
184	0.676221	0.541878	0.40473	0.324903	0.254708			92.5	0.000197	0.001179	0.002569	0.001612	0.002103
185	0.675811	0.539875	0.402652	0.323464	0.252777			93	0.00128	0.000866	0.002268	0.002142	0.001911
186	0.674103	0.538624	0.400339	0.320779	0.251921			93.5	0.000836	0.001482	0.001674	0.001173	0.002991
187	0.673139	0.536992	0.399252	0.318947	0.249351			94	0.001255	0.00162	0.002577	0.001216	0.002006
188	0.670645	0.535175	0.3984	0.317233	0.247966			94.5	-0.00012	0.001524	0.003748	0.001376	0.002416
189	0.66951	0.533705	0.395592	0.316338	0.24606			95	0.000104	0.001839	0.002507	0.002504	0.00219
190	0.668075	0.531089	0.394423	0.314339	0.243995			95.5	-3.18e-05	0.000739	0.003277	0.002296	0.001755
191	0.667777	0.530515	0.39362	0.313001	0.241997			96	0.001159	0.002146	0.004474	0.002869	0.001392
192	0.666769	0.527761	0.38914	0.310475	0.240242			96.5	0.001512	0.000856	0.001141	0.002008	0.001293
193	0.666001	0.52609	0.388961	0.309137	0.238932			97	0.002148	0.000897	0.00309	0.002547	0.001719
194	0.663653	0.524248	0.387444	0.306753	0.237085			97.5	0.000927	0.000716	0.003377	0.001826	0.001476
195	0.662398	0.523465	0.385488	0.304737	0.235524			98	0.00098	0.001841	0.003118	0.001529	0.001573
196	0.661228	0.521357	0.384027	0.302981	0.233584			98.5	0.001132	0.001315	0.003449	0.001528	0.001197
197	0.659657	0.520097	0.381154	0.301534	0.232904			99	0.000809	0.00183	0.002031	0.001885	0.002308
198	0.660101	0.517763	0.38096	0.298941	0.231888			99.5	0.002842	0.001004	0.003906	0.000851	0.003001
199	0.657983	0.516931	0.378777	0.297862	0.228891			100	0.001865	0.002042	0.003321	0.001628	0.001319
200	0.656182	0.515906	0.376237	0.295512	0.227724			100.5	0.001266	0.002822	0.002282	0.00086	0.001799
201	0.655208	0.512708	0.375109	0.295386	0.226331			101	0.001629	0.00091	0.002972	0.002739	0.002002
202	0.653005	0.511367	0.373485	0.293011	0.22508			101.5	0.000546	0.001286	0.00304	0.001926	0.002355
203	0.652912	0.510664	0.371911	0.290276	0.223997			102	0.001934	0.002441	0.003158	0.000658	0.002901
204	0.652117	0.508419	0.36955	0.2899	0.221856			102.5	0.002495	0.001683	0.002301	0.002201	0.002169
205	0.649044	0.506982	0.368089	0.288118	0.219463			103	0.000379	0.001926	0.00253	0.002049	0.001123
206	0.646977	0.505003	0.366669	0.286538	0.217985			103.5	-0.00056	0.001482	0.002804	0.00213	0.001149
207	0.647413	0.503146	0.364607	0.284856	0.216768			104	0.001439	0.001176	0.00228	0.002068	0.001467
208	0.646192	0.502007	0.36408	0.282958	0.215198			104.5	0.001484	0.001763	0.003638	0.001744	0.001361
209	0.645133	0.500795	0.361759	0.28162	0.213938			105	0.001716	0.002243	0.002776	0.002074	0.001611
210	0.643263	0.499003	0.360558	0.28044	0.213099			105.5	0.000995	0.001998	0.003274	0.002581	0.002339
211	0.643186	0.496693	0.358772	0.278065	0.210639			106	0.002374	0.001114	0.003047	0.001643	0.001133
212	0.641607	0.495982	0.357052	0.276693	0.209455			106.5	0.001985	0.002196	0.00289	0.001895	0.001433
213	0.639652	0.494432	0.355697	0.275547	0.208733			107	0.001163	0.002226	0.003171	0.002406	0.002266
214	0.638823	0.493398	0.353611	0.273373	0.207516			107.5	0.001645	0.002891	0.002548	0.001672	0.002496
215	0.636749	0.491871	0.352564	0.271365	0.206072			108	0.000666	0.002945	0.003188	0.001126	0.00244
216	0.635024	0.489901	0.35116	0.270964	0.20493			108.5	9.86e-05	0.002441	0.003384	0.002488	0.00274
217	0.63569	0.487858	0.349302	0.268898	0.202898			109	0.002325	0.00183	0.003008	0.001852	0.001952
218	0.633888	0.486743	0.347573	0.26797	0.201437			109.5	0.001657	0.002368	0.002773	0.002563	0.001845
219	0.632582	0.483723	0.345536	0.265912	0.199909			110	0.001566	0.000543	0.002157	0.001905	0.001643
220	0.630482	0.483432	0.34401	0.264649	0.198197			110.5	0.000542	0.002084	0.002163	0.00219	0.001205
221	0.629986	0.482116	0.342939	0.262341	0.197105			111	0.001395	0.002355	0.002713	0.001221	0.001493
222	0.628706	0.480791	0.342387	0.261881	0.195191			111.5	0.001327	0.002602	0.003893	0.002443	0.000797
223	0.627519	0.47916	0.340261	0.260509	0.19478			112	0.001359	0.002463	0.003124	0.00256	0.001875
224	0.62658	0.477488	0.337883	0.258962	0.193554			112.5	0.001687	0.002266	0.002039	0.00247	0.001964
225	0.625606	0.475849	0.336544	0.257674	0.191682			113	0.001965	0.002113	0.002221	0.002668	0.001277
226	0.62453	0.473087	0.335376	0.254721	0.189885			113.5	0.002117	0.000549	0.00261	0.000858	0.000667
227	0.623139	0.472513	0.33454	0.253492	0.189566			114	0.001901	0.0017	0.003397	0.001109	0.001807
228	0.621892	0.47173	0.333176	0.251451	0.188785			114.5	0.001852	0.002578	0.003522	0.000375	0.002384
229	0.620125	0.469347	0.330953	0.252446	0.187509			115	0.001184	0.00146	0.002572	0.003255	0.002359
230	0.620159	0.468685	0.329638	0.249494	0.185242			115.5	0.00263	0.002476	0.002744	0.001418	0.001151
231	0.618417	0.466125	0.327901	0.248432	0.184898			116	0.001996	0.001132	0.002378	0.00182	0.002207
232	0.615881	0.466149	0.325921	0.246684	0.183017			116.5	0.000417	0.002991	0.001708	0.001389	0.001434
233	0.61653	0.463751	0.325889	0.246525	0.181263			117	0.002571	0.001829	0.003424	0.00285	0.000796
234	0.613892	0.46174	0.323511	0.244317	0.180582			117.5	0.000868	0.001145	0.002246	0.001854	0.00142
235	0.613533	0.461166	0.323292	0.243163	0.179609			118	0.001838	0.002242	0.003718	0.002102	0.001689
236	0.611868	0.458663	0.320955	0.241632	0.178593			118.5	0.001274	0.000936	0.002568	0.001893	0.0019
237	0.610391	0.45855	0.319689	0.24031	0.177753			119	0.000923	0.002582	0.002736	0.001923	0.002297
238	0.60946	0.456846	0.318155	0.239717	0.175738			119.5	0.001209	0.002248	0.002555	0.002814	0.001297
239	0.608581	0.454867	0.316678	0.2375	0.174504			120	0.00155	0.001573	0.002439	0.001747	0.001208
240	0.606865	0.453736	0.316134	0.235526	0.173681			120.5	0.000914	0.001939	0.003473	0.000966	0.001607
241	0.606045	0.452864	0.314462	0.235267	0.172615			121	0.001323	0.00262	0.003099	0.002232	0.001705
242	0.606677	0.449941	0.313505	0.234046	0.17144			121.5	0.003432	0.000755	0.003598	0.002325	0.001656
243	0.606592	0.448487	0.312125	0.231955	0.170071			122	0.004689	0.0007	0.003569	0.001375	0.001363
244	0.603697	0.44919	0.309569	0.231579	0.168871			122.5	0.002652	0.003316	0.002077	0.002469	0.001265
245	0.601059	0.446597	0.308571	0.230006	0.167485			123	0.00092	0.00184	0.002505	0.002115	0.000938
246	0.600205	0.445547	0.306793	0.227965	0.166704			123.5	0.001276	0.002269	0.001964	0.001195	0.001322
247	0.598438	0.443197	0.305763	0.227246	0.165269			124	0.000555	0.001078	0.002325	0.001847	0.000913
248	0.59784	0.44159	0.305081	0.226652	0.16369			124.5	0.001203	0.000805	0.003114	0.002635	0.000331
249	0.598207	0.442099	0.303223	0.225247	0.163917			125	0.00297	0.003149	0.002443	0.002447	0.001883
250	0.596269	0.440128	0.3016	0.223206	0.163355			125.5	0.002048	0.002404	0.00206	0.001492	0.002481
251	0.593878	0.43815	0.299757	0.221667	0.160819			126	0.000581	0.00166	0.001389	0.001121	0.00073
252	0.59387	0.435694	0.299254	0.220572	0.160592			126.5	0.001903	0.000309	0.002364	0.001276	0.001707
253	0.591966	0.43454	0.29772	0.219426	0.158888			127	0.001003	0.00056	0.002068	0.001359	0.000922
254	0.591889	0.434693	0.297534	0.219183	0.157797			127.5	0.002247	0.00243	0.003413	0.002512	0.00086
255	0.590856	0.43307	0.294896	0.217619	0.156949			128	0.002359	0.002097	0.001737	0.00207	0.001069
256	0.589788	0.431027	0.294555	0.216557	0.155832			128.5	0.002434	0.001229	0.002876	0.00223	0.000959
257	0.587201	0.43076	0.293549	0.214901	0.155412			129	0.000715	0.002563	0.003189	0.001663	0.001665
258	0.587637	0.428838	0.291447	0.214382	0.154119			129.5	0.002542	0.001833	0.00215	0.002451	0.00132
259	0.586646	0.428426	0.290928	0.21225	0.152255			130	0.002696	0.002971	0.00305	0.001306	0.000291
260	0.584418	0.426762	0.289532	0.211229	0.151634			130.5	0.001403	0.002558	0.002863	0.001476	0.000733
261	0.58452	0.425284	0.288729	0.209414	0.151088			131	0.002827	0.002363	0.003395	0.000683	0.001248
262	0.582761	0.423169	0.286489	0.207725	0.150534			131.5	0.002074	0.001373	0.00215	4.05e-05	0.001749
263	0.582573	0.422652	0.284971	0.206704	0.149174			132	0.003153	0.002358	0.001787	0.000186	0.001283
264	0.58008	0.421553	0.282772	0.207014	0.148158			132.5	0.001529	0.002611	0.000582	0.001906	0.001216
265	0.578492	0.419987	0.282804	0.205902	0.147361			133	0.000965	0.002285	0.002118	0.001923	0.0014
266	0.579056	0.418137	0.280987	0.204162	0.146177			133.5	0.002923	0.001608	0.001363	0.001184	0.001125
267	0.577066	0.417677	0.281133	0.203208	0.145942			134	0.001879	0.002629	0.003015	0.001367	0.001961
268	0.575324	0.415957	0.278836	0.20284	0.143499			134.5	0.001127	0.002098	0.001653	0.002255	0.000158
269	0.574641	0.414479	0.277424	0.201218	0.142995			135	0.001608	0.001861	0.001381	0.001625	0.000658
270	0.573361	0.414608	0.276134	0.201126	0.14292			135.5	0.001389	0.003597	0.001252	0.002825	0.001666
271	0.572703	0.411765	0.276409	0.199068	0.14114			136	0.001895	0.001658	0.003039	0.001656	0.000629
272	0.571141	0.410982	0.274713	0.198148	0.140141			136.5	0.001347	0.002262	0.002389	0.001848	0.000516
273	0.57056	0.408866	0.273025	0.197864	0.139763			137	0.001941	0.001211	0.001737	0.002785	0.001129
274	0.569314	0.407679	0.272051	0.19589	0.139788			137.5	0.001751	0.001301	0.001965	0.001699	0.002226
275	0.569322	0.406039	0.271621	0.194209	0.13758			138	0.003028	0.000827	0.00286	0.000956	0.000644
276	0.567273	0.405547	0.270437	0.192344	0.136346			138.5	0.001892	0.001766	0.002814	-2.11e-05	0.000225
277	0.566411	0.403713	0.268156	0.19231	0.135221			139	0.00214	0.001033	0.001409	0.001187	-8.54e-05
278	0.565266	0.402801	0.267304	0.191357	0.135624			139.5	0.002061	0.001442	0.001756	0.001288	0.001433
279	0.563841	0.402349	0.266022	0.190571	0.134264			140	0.001644	0.002424	0.001571	0.001579	0.00083
280	0.563525	0.39999	0.264853	0.18914	0.132601			140.5	0.002525	0.001029	0.001511	0.001093	-0.00014
281	0.561894	0.399167	0.264123	0.188488	0.132929			141	0.001869	0.00153	0.00199	0.001538	0.001255
282	0.559691	0.398028	0.263149	0.186698	0.131644			141.5	0.000539	0.00164	0.002164	0.000602	0.000726
283	0.55987	0.396897	0.261656	0.185895	0.130989			142	0.001989	0.001744	0.001683	0.000846	0.00094
284	0.559324	0.39609	0.260252	0.185452	0.12978			142.5	0.0026	0.002256	0.001309	0.001517	0.000486
285	0.556959	0.394789	0.259732	0.184264	0.128026			143	0.001062	0.002142	0.00202	0.001283	-0.00063
286	0.555985	0.394232	0.258539	0.183888	0.127698			143.5	0.001164	0.002946	0.001895	0.00201	-5.49e-05
287	0.555575	0.391454	0.258677	0.182299	0.127119			144	0.001917	0.001002	0.003404	0.001288	0.000218
288	0.554756	0.390275	0.256454	0.180659	0.125943			144.5	0.00219	0.001025	0.001995	0.000484	-0.00022
289	0.553467	0.389176	0.255602	0.180509	0.125616			145	0.001903	0.001138	0.00227	0.00147	0.000335
290	0.552792	0.388127	0.253889	0.180183	0.124944			145.5	0.002342	0.001314	0.00147	0.00223	0.000477
291	0.550009	0.387157	0.252461	0.177874	0.123005			146	0.000304	0.001579	0.001021	0.000613	-0.0009
292	0.549846	0.386172	0.25169	0.176394	0.123223			146.5	0.001339	0.001824	0.001378	-2.16e-05	0.000289
293	0.549462	0.38484	0.25083	0.175783	0.122535			147	0.002102	0.001636	0.001617	0.000378	0.000389
294	0.548941	0.384121	0.250351	0.175541	0.121502			147.5	0.00271	0.002195	0.00232	0.001213	6.94e-05
295	0.547268	0.38169	0.24941	0.174027	0.121166			148	0.001963	0.000629	0.002441	0.000514	0.000577
296	0.54568	0.381367	0.247137	0.173433	0.120159			148.5	0.001317	0.001676	0.000925	0.000912	0.000268
297	0.546303	0.38043	0.246553	0.172446	0.118816			149	0.003249	0.00195	0.001478	0.000839	-0.00043
298	0.543673	0.378807	0.246399	0.171911	0.118253			149.5	0.001379	0.001375	0.002553	0.00129	-0.00022
299	0.543118	0.379574	0.244402	0.170564	0.118144			150	0.001933	0.003758	0.001352	0.000767	0.000531
300	0.542247	0.376844	0.24463	0.169903	0.117136			150.5	0.002115	0.001797	0.00288	0.001066	0.0002
301	0.540813	0.375932	0.242787	0.168306	0.117178			151	0.001627	0.002086	0.001855	0.000224	0.001117
302	0.538567	0.374963	0.240588	0.167863	0.115827			151.5	0.000197	0.002292	0.000392	0.000765	0.000368
303	0.538064	0.37342	0.241286	0.165454	0.113887			152	0.000793	0.001794	0.002488	-0.00105	-0.00108
304	0.53709	0.372386	0.239152	0.166307	0.113165			152.5	0.000846	0.001911	0.001085	0.00102	-0.00109
305	0.536458	0.3717	0.238154	0.165253	0.112477			153	0.001292	0.002464	0.00108	0.000812	-0.00107
306	0.535707	0.369875	0.236823	0.164308	0.11293			153.5	0.001594	0.001594	0.000649	0.000727	0.000304
307	0.535886	0.368841	0.237188	0.163865	0.112166			154	0.002996	0.001706	0.002311	0.001223	0.000217
308	0.532795	0.367056	0.236831	0.162619	0.110722			154.5	0.000547	0.000876	0.00308	0.000767	-0.00068
309	0.532138	0.365667	0.234469	0.161782	0.10974			155	0.000954	0.00053	0.001365	0.000791	-0.00103
310	0.530627	0.3649	0.232733	0.16016	0.108447			155.5	0.00036	0.000949	0.000422	-0.00014	-0.00176
311	0.531182	0.363584	0.232806	0.160026	0.109303			156	0.002187	0.000691	0.001698	0.000713	6.16e-05
312	0.530311	0.36389	0.231621	0.15893	0.107985			156.5	0.002339	0.002431	0.001425	0.000411	-0.00071
313	0.52897	0.362655	0.230696	0.158604	0.107406			157	0.001933	0.002261	0.001462	0.001016	-0.0006
314	0.527826	0.359747	0.229227	0.156588	0.107162			157.5	0.001758	1.88e-05	0.000817	-0.0004	-0.0001
315	0.526349	0.360127	0.228659	0.157199	0.106952			158	0.001187	0.001833	0.001281	0.00132	0.000427
316	0.525649	0.358722	0.228334	0.155785	0.105525			158.5	0.001526	0.001436	0.002037	0.000604	-0.0005
317	0.52453	0.356703	0.226476	0.154363	0.104644			159	0.001375	0.000275	0.000901	-0.00012	-0.00077
318	0.524138	0.355847	0.227011	0.153661	0.104896			159.5	0.00207	0.000555	0.002714	4.45e-06	0.000284
319	0.522865	0.355354	0.225672	0.153443	0.104232			160	0.00173	0.001273	0.002206	0.000711	0.000257
320	0.521286	0.354522	0.224853	0.151637	0.103854			160.5	0.00103	0.001568	0.002331	-0.0005	0.00056
321	0.520458	0.352269	0.2234	0.150834	0.101814			161	0.001207	0.000102	0.001674	-0.0005	-0.00112
322	0.517871	0.351994	0.222085	0.15121	0.10147			161.5	-0.00068	0.001072	0.00118	0.000887	-0.00079
323	0.518016	0.351308	0.22198	0.14968	0.101252			162	0.000643	0.001537	0.002164	1.62e-06	-0.00031
324	0.51846	0.350242	0.219732	0.150483	0.100404			162.5	0.002301	0.001528	0.000508	0.001895	-0.00059
325	0.517725	0.348901	0.219269	0.148308	0.09969			163	0.002579	0.001167	0.001048	0.000217	-0.00072
326	0.515787	0.348134	0.218636	0.148316	0.099581			163.5	0.00144	0.001516	0.001374	0.00115	-0.00012
327	0.51472	0.346341	0.218612	0.147748	0.099203			164	0.001331	0.000587	0.002446	0.001391	0.00014
328	0.514532	0.34492	0.217305	0.146225	0.098599			164.5	0.002238	0.000116	0.001928	0.000473	0.000138
329	0.512824	0.34559	0.215926	0.145364	0.096735			165	0.001364	0.002228	0.001316	0.000355	-0.00138
330	0.512261	0.343595	0.214603	0.144586	0.096743			165.5	0.001832	0.001038	0.000767	0.000327	-0.00067
331	0.511834	0.34202	0.213385	0.143892	0.096391			166	0.002452	0.000365	0.00034	0.000387	-0.00039
332	0.510468	0.341181	0.213361	0.1437	0.095518			166.5	0.001974	0.000602	0.001389	0.001041	-0.00074
333	0.508427	0.340817	0.213053	0.143022	0.095274			167	0.000702	0.001411	0.002077	0.001114	-0.00034
334	0.507266	0.340171	0.211519	0.141726	0.094703			167.5	0.000462	0.001877	0.001248	0.000449	-0.00034
335	0.507155	0.339057	0.210602	0.142286	0.094048			168	0.001453	0.001757	0.00117	0.001989	-0.00045
336	0.505695	0.337207	0.209514	0.140438	0.092965			168.5	0.000846	0.000717	0.000882	0.000644	-0.00107
337	0.50555	0.336787	0.209092	0.139651	0.093091			169	0.001789	0.001446	0.001413	0.000566	-0.00026
338	0.50432	0.33535	0.207494	0.139007	0.092613			169.5	0.001454	0.000915	0.000478	0.00065	-0.00016
339	0.503424	0.33581	0.208273	0.137502	0.092084			170	0.001518	0.00272	0.002481	-0.00029	-0.00014
340	0.50228	0.334574	0.206682	0.138664	0.091001			170.5	0.001274	0.002431	0.001548	0.001938	-0.00078
341	0.501059	0.33287	0.205165	0.137042	0.091202			171	0.000946	0.001553	0.000708	0.000841	0.000115
342	0.501153	0.331659	0.203899	0.135495	0.090472			171.5	0.002154	0.001279	0.000163	-0.00017	-0.00012
343	0.499658	0.330843	0.203623	0.135118	0.08917			172	0.001498	0.001491	0.000849	0.000205	-0.00103
344	0.498668	0.329753	0.202495	0.134784	0.089296			172.5	0.001433	0.001366	0.000464	0.000633	-0.00025
345	0.497199	0.329147	0.202689	0.133956	0.089557			173	0.000804	0.001823	0.001717	0.000472	0.000693
346	0.496371	0.327257	0.201294	0.13204	0.088398			173.5	0.000923	0.000695	0.000998	-0.001	-5.87e-05
347	0.496849	0.327556	0.199524	0.13281	0.087307			174	0.002575	0.002279	-0.00019	0.000729	-0.00074
348	0.494664	0.326741	0.199492	0.132149	0.087827			174.5	0.001097	0.002471	0.000769	0.000739	0.00049
349	0.493152	0.325561	0.198104	0.131681	0.08598			175	0.000413	0.00221	4.98e-05	0.000985	-0.00109
350	0.493673	0.324665	0.198445	0.130393	0.085527			175.5	0.002106	0.002291	0.001448	0.000242	-0.00103
351	0.492802	0.322307	0.197009	0.129782	0.084696			176	0.00216	0.000559	0.00066	0.0003	-0.00141
352	0.491479	0.322363	0.195783	0.128327	0.084519			176.5	0.001691	0.001817	0.000121	-0.00065	-0.00102
353	0.489558	0.321507	0.19657	0.127574	0.083831			177	0.000512	0.001945	0.002065	-0.00077	-0.00126
354	0.488841	0.320684	0.19472	0.1278	0.082983			177.5	0.000742	0.002096	0.000744	0.000282	-0.00167
355	0.487944	0.31856	0.193332	0.126721	0.08373			178	0.000757	0.000645	1.71e-06	-0.00024	-0.0002
356	0.487816	0.318584	0.19287	0.12637	0.083134			178.5	0.001682	0.001846	0.000383	0.000115	-0.00033
357	0.4854	0.318115	0.19145	0.12652	0.083134			179	-9.03e-05	0.002428	-0.00041	0.001053	0.000247
358	0.485007	0.315717	0.191141	0.125558	0.081245			179.5	0.000515	0.000618	0.000152	0.000663	-0.00143
359	0.484085	0.314174	0.190752	0.124596	0.082177			180	0.000503	-0.00013	0.000611	0.000271	0.000245
360	0.483581	0.313835	0.18934	0.12376	0.080556			180.5	0.000966	0.000601	-0.00019	1.8e-05	-0.00112
361	0.48388	0.312389	0.189096	0.123927	0.081186			181	0.002373	-3.69e-05	0.000449	0.000967	0.0002
362	0.482087	0.311889	0.187952	0.122171	0.079851			181.5	0.001326	0.000487	-3.13e-05	-0.00039	-0.00084
363	0.480908	0.311525	0.187108	0.121987	0.078827			182	0.000996	0.001179	-0.00015	0.00013	-0.0015
364	0.479107	0.310136	0.186605	0.12233	0.07907			182.5	-6.16e-05	0.000606	0.000147	0.001271	-0.00066
365	0.479901	0.309627	0.186337	0.121059	0.079121			183	0.001919	0.001109	0.000737	0.00048	-6.41e-05
366	0.47798	0.308763	0.185136	0.120038	0.07855			183.5	0.000714	0.00117	0.000168	-2.09e-05	-0.0002
367	0.477203	0.307625	0.184543	0.120055	0.077551			184	0.000847	0.000886	0.000341	0.000718	-0.00085
368	0.475965	0.306857	0.184819	0.119076	0.076199			184.5	0.000436	0.001063	0.001588	0.000268	-0.00193
369	0.475914	0.306203	0.183221	0.1188	0.077173			185	0.001424	0.001364	0.000513	0.00065	-0.00024
370	0.47494	0.305056	0.181273	0.117404	0.075645			185.5	0.001314	0.001069	-0.00099	-0.00032	-0.00153
371	0.47424	0.303651	0.18163	0.116391	0.076149			186	0.001532	0.000438	0.000346	-0.00082	-0.00041
372	0.472831	0.302706	0.181054	0.116266	0.075653			186.5	0.00092	0.000378	0.000517	-0.00028	-0.00049
373	0.471815	0.302601	0.179828	0.116743	0.075779			187	0.000754	0.001349	-0.00011	0.000995	0.000187
374	0.47103	0.3008	0.179171	0.115789	0.073773			187.5	0.000866	0.000223	-3.74e-05	0.000536	-0.0017
375	0.470313	0.300873	0.179098	0.115572	0.073739			188	0.001056	0.001411	0.000741	0.00097	-0.00123
376	0.470944	0.300348	0.177662	0.114894	0.074864			188.5	0.00282	0.001848	-0.00016	0.000837	0.000619
377	0.468075	0.299718	0.17758	0.113799	0.073345			189	0.000481	0.002156	0.000611	0.000207	-0.00069
378	0.467734	0.29845	0.17659	0.112486	0.072648			189.5	0.001106	0.001678	0.000254	-0.00069	-0.00102
379	0.466154	0.29677	0.17668	0.111674	0.072455			190	0.00027	0.000681	0.001217	-0.00098	-0.00076
380	0.466052	0.29547	0.175438	0.11088	0.071447			190.5	0.001165	0.000146	0.000548	-0.00128	-0.00147
381	0.465505	0.29526	0.175146	0.111599	0.071724			191	0.001544	0.000959	0.001033	0.000248	-0.00066
382	0.464336	0.294889	0.174294	0.111641	0.071749			191.5	0.001183	0.001577	0.000828	0.000964	-0.00014
383	0.462167	0.293185	0.17302	0.110963	0.070893			192	-0.00035	0.000533	0.000106	0.000806	-0.00067
384	0.461757	0.291796	0.172297	0.109717	0.071758			192.5	0.000184	-0.00012	5e-05	-2.85e-05	0.000833
385	0.4611	0.291303	0.171697	0.10914	0.070095			193	0.000421	0.000329	0.000141	-7.75e-05	-0.00068
386	0.460878	0.289615	0.171194	0.108379	0.068853			193.5	0.00117	-0.0007	0.000358	-0.00034	-0.00169
387	0.460417	0.28913	0.170837	0.107777	0.06819			194	0.001632	-0.00025	0.000746	-0.00043	-0.002
388	0.459477	0.289332	0.169765	0.107994	0.068752			194.5	0.001533	0.001046	0.000246	0.000473	-0.00088
389	0.458265	0.288218	0.168361	0.107283	0.067636			195	0.001106	0.000717	-0.00067	0.000254	-0.00174
390	0.456728	0.288315	0.166966	0.10694	0.067619			195.5	0.000301	0.00188	-0.00157	0.000475	-0.00131
391	0.45584	0.286659	0.167079	0.10464	0.067367			196	0.000261	0.000866	-0.00062	-0.00165	-0.00115
392	0.455251	0.285084	0.167371	0.103938	0.067342			196.5	0.00056	-5e-05	0.000546	-0.00187	-0.00073
393	0.454688	0.284301	0.16617	0.104565	0.066007			197	0.000892	1.96e-05	-0.00013	-0.0005	-0.00187
394	0.454278	0.284527	0.164937	0.104297	0.06573			197.5	0.001404	0.001326	-0.00084	-0.00021	-0.00175
395	0.452732	0.28296	0.165351	0.104122	0.065469			198	0.000575	0.000411	0.00046	0.000193	-0.00162
396	0.452143	0.282338	0.163939	0.102742	0.065024			198.5	0.000878	0.000663	-0.00049	-0.00085	-0.00171
397	0.451366	0.281975	0.163013	0.102976	0.064689			199	0.00095	0.001232	-0.00083	3.5e-05	-0.00167
398	0.45006	0.281345	0.162535	0.101479	0.064873			199.5	0.000398	0.001465	-0.00065	-0.00116	-0.00103
399	0.450213	0.280174	0.163005	0.101797	0.065209			200	0.001556	0.001028	0.000721	-0.00019	-0.00019
400	0.448378	0.279035	0.161585	0.100325	0.06358			200.5	0.000387	0.000635	-0.00025	-0.00135	-0.00171
401	0.447131	0.278858	0.160798	0.101211	0.063287			201	-9.89e-05	0.001419	-0.00044	0.000303	-0.00163
402	0.447037	0.277751	0.159719	0.099898	0.063177			201.5	0.000765	0.00105	-0.001	-0.00069	-0.00134
403	0.445808	0.277073	0.159986	0.10035	0.062716			202	0.000296	0.001213	9.02e-05	0.00044	-0.00148
404	0.444578	0.274989	0.15954	0.098183	0.062858			202.5	-0.00017	-0.00038	0.000309	-0.00157	-0.00089
405	0.443511	0.275264	0.157982	0.098384	0.062229			203	-0.00046	0.00096	-0.00085	-0.00075	-0.00123
406	0.444228	0.274069	0.157657	0.09784	0.061398			203.5	0.001351	0.000466	-0.00049	-0.00083	-0.00181
407	0.443169	0.27402	0.157568	0.097548	0.060986			204	0.001066	0.00139	0.000147	-0.00062	-0.00189
408	0.442427	0.271993	0.155888	0.095925	0.062061			204.5	0.001165	-0.00014	-0.00116	-0.00199	-0.0002
409	0.440864	0.270854	0.15575	0.0958	0.06086			205	0.000294	-0.00057	-0.00059	-0.00158	-0.00123
410	0.439191	0.271573	0.154703	0.095791	0.060029			205.5	-0.00071	0.001295	-0.00113	-0.00103	-0.00182
411	0.439788	0.270943	0.155085	0.095925	0.060239			206	0.000952	0.001495	7.28e-05	-0.00031	-0.00117
412	0.438106	0.269732	0.154038	0.094988	0.059584			206.5	-7.26e-05	0.000961	-0.00048	-0.00088	-0.00156
413	0.437474	0.267995	0.153194	0.094311	0.05908			207	0.000141	-0.00022	-0.00078	-0.00114	-0.00177
414	0.436783	0.267244	0.152796	0.09355	0.059819			207.5	0.000288	-0.00019	-0.00054	-0.0015	-0.0005
415	0.434631	0.266913	0.151352	0.093659	0.059315			208	-0.00129	0.00036	-0.0016	-0.00083	-0.00072
416	0.435314	0.266614	0.151003	0.092914	0.058828			208.5	0.000465	0.000945	-0.0013	-0.00117	-0.00091
417	0.435323	0.266065	0.1511	0.092345	0.058518			209	0.00142	0.001222	-0.00047	-0.00132	-0.0009
418	0.433931	0.264289	0.149412	0.092145	0.057695			209.5	0.00073	-2.77e-05	-0.00183	-0.00102	-0.0015
419	0.432488	0.26357	0.147943	0.091417	0.057619			210	-1.65e-05	3.54e-05	-0.00292	-0.00136	-0.00122
420	0.431839	0.262891	0.148325	0.091977	0.057183			210.5	0.00016	0.000138	-0.00174	-0.00016	-0.00137
421	0.431105	0.262148	0.148333	0.091091	0.057821			211	0.00024	0.000159	-0.00103	-0.0007	-0.00024
422	0.429705	0.261664	0.147765	0.090664	0.057275			211.5	-0.00047	0.000497	-0.00101	-0.00069	-0.00052
423	0.429047	0.260008	0.148333	0.090305	0.05631			212	-0.0003	-0.00062	0.000381	-0.0006	-0.00131
424	0.427809	0.259419	0.147335	0.089627	0.056419			212.5	-0.00082	-0.00042	-0.00015	-0.00089	-0.00081
425	0.428364	0.258369	0.145987	0.089209	0.055688			213	0.000766	-0.00079	-0.00112	-0.00088	-0.00133
426	0.426776	0.257795	0.145768	0.088741	0.055563			213.5	-0.00017	-0.00057	-0.00069	-0.00093	-0.00111
427	0.425897	0.25845	0.144616	0.088515	0.054589			214	-0.00027	0.001164	-0.00142	-0.00069	-0.00192
428	0.42494	0.256996	0.143699	0.08808	0.054857			214.5	-0.00046	0.000277	-0.00186	-0.00071	-0.00125
429	0.424667	0.25555	0.143618	0.088364	0.054656			215	0.000141	-0.00059	-0.00129	0.000136	-0.00113
430	0.423899	0.255663	0.142993	0.087185	0.053606			215.5	0.000154	0.000458	-0.00138	-0.00078	-0.00204
431	0.423292	0.255243	0.142587	0.087018	0.054194			216	0.000364	0.000852	-0.0012	-0.00048	-0.00098
432	0.423045	0.253612	0.1418	0.086273	0.052532			216.5	0.000993	-0.00026	-0.00149	-0.00088	-0.00262
433	0.421969	0.253152	0.142035	0.08552	0.053094			217	0.000651	8.08e-05	-0.00053	-0.00129	-0.00161
434	0.42062	0.252489	0.141118	0.086859	0.052616			217.5	-1.76e-05	0.000163	-0.001	0.000803	-0.00185
435	0.419493	0.25215	0.140396	0.08532	0.052742			218	-0.00042	0.000643	-0.00122	-0.00055	-0.00136
436	0.41881	0.251528	0.139901	0.083588	0.052784			218.5	-0.00031	0.000767	-0.00117	-0.00214	-0.00097
437	0.418699	0.250333	0.140274	0.085144	0.052708			219	0.000467	0.000182	-4.97e-05	0.000194	-0.00073
438	0.41811	0.249041	0.139016	0.08394	0.051709			219.5	0.000691	-0.00053	-0.00095	-0.00076	-0.00159
439	0.416342	0.250155	0.138075	0.083823	0.051818			220	-0.00048	0.001734	-0.00146	-0.00043	-0.00112
440	0.415796	0.248871	0.137296	0.083931	0.050592			220.5	-0.00022	0.001029	-0.00177	0.000177	-0.00226
441	0.415574	0.246949	0.137012	0.082652	0.050844			221	0.00043	-0.00047	-0.00147	-0.00089	-0.00164
442	0.413764	0.246594	0.137158	0.082225	0.051239			221.5	-0.00079	-3.06e-05	-0.00064	-0.00093	-0.00084
443	0.412645	0.245431	0.136492	0.08118	0.051323			222	-0.0012	-0.00059	-0.00082	-0.00171	-0.00043
444	0.411629	0.244575	0.136289	0.08077	0.050878			222.5	-0.00149	-0.00078	-0.00043	-0.00175	-0.00064
445	0.412483	0.245116	0.134812	0.081949	0.049753			223	0.000398	0.000764	-0.00162	0.000118	-0.00166
446	0.411843	0.244163	0.133831	0.082091	0.049367			223.5	0.00055	0.000454	-0.00219	0.000743	-0.00181
447	0.410118	0.243783	0.133977	0.079289	0.049501			224	-0.00058	0.000847	-0.00138	-0.00216	-0.00134
448	0.408581	0.242306	0.132629	0.079532	0.049383			224.5	-0.00149	-0.00012	-0.00242	-0.00141	-0.00116
449	0.408632	0.241175	0.1331	0.078813	0.049173			225	-0.00054	-0.00066	-0.00122	-0.00182	-0.00111
450	0.408974	0.240747	0.13228	0.079783	0.049022			225.5	0.000747	-0.00034	-0.0016	-0.00021	-0.00099
451	0.407471	0.24065	0.132475	0.0799	0.048787			226	-0.00013	0.0004	-0.00075	0.000367	-0.00096
452	0.40701	0.239673	0.132094	0.079766	0.048325			226.5	0.000215	4.05e-05	-0.0006	0.00065	-0.00121
453	0.405815	0.239132	0.131104	0.078737	0.04778			227	-0.00031	0.000217	-0.0012	-0.00015	-0.00156
454	0.405123	0.237444	0.131485	0.077433	0.047536			227.5	-0.00024	-0.00102	-0.00012	-0.00127	-0.00155
455	0.404858	0.237492	0.13043	0.077516	0.047083			228	0.000335	-0.00013	-0.00081	-0.00074	-0.00179
456	0.403287	0.237355	0.129221	0.076546	0.046697			228.5	-0.00063	0.00055	-0.0017	-0.00146	-0.00197
457	0.40403	0.236176	0.128531	0.075885	0.048023			229	0.001117	-7.84e-05	-0.00195	-0.00183	-9e-05
458	0.402382	0.235344	0.12862	0.07581	0.046932			229.5	5.69e-05	-0.00026	-0.00123	-0.00149	-0.0011
459	0.401341	0.234205	0.128215	0.07617	0.046915			230	-0.00029	-0.00085	-0.00113	-0.00063	-0.00083
460	0.401161	0.233826	0.126949	0.075199	0.045798			230.5	0.000366	-0.00048	-0.00211	-0.00137	-0.00187
461	0.399428	0.233414	0.127338	0.075099	0.045958			231	-0.00079	-0.00017	-0.00103	-0.00108	-0.0014
462	0.399027	0.233898	0.125301	0.075317	0.045018			231.5	-0.00039	0.001257	-0.00295	-0.0004	-0.00224
463	0.398045	0.231177	0.126251	0.074213	0.045647			232	-0.00068	-0.00129	-0.00119	-0.0013	-0.00121
464	0.397814	0.232437	0.124993	0.073477	0.045614			232.5	-8.64e-05	0.001088	-0.00216	-0.00177	-0.00097
465	0.396303	0.231524	0.124839	0.073393	0.04516			233	-0.001	0.000775	-0.00177	-0.00146	-0.00123
466	0.395953	0.229352	0.125155	0.073468	0.045202			233.5	-0.00055	-0.00111	-0.0008	-0.00096	-0.00091
467	0.396149	0.228633	0.123118	0.073468	0.044304			234	0.000542	-0.00118	-0.00273	-0.00056	-0.0017
468	0.395278	0.228746	0.12281	0.073502	0.044774			234.5	0.000386	-0.00023	-0.00253	-0.00011	-0.00087
469	0.393955	0.228172	0.122575	0.072264	0.045773			235	-0.00032	-0.00014	-0.00225	-0.00119	0.00059
470	0.394433	0.227123	0.121885	0.071754	0.044279			235.5	0.001106	-0.00064	-0.00253	-0.0014	-0.00092
471	0.391948	0.226412	0.122372	0.070842	0.043347			236	-0.00095	-0.00071	-0.00137	-0.0021	-0.00176
472	0.391368	0.226791	0.12225	0.070432	0.043624			236.5	-0.00078	0.000555	-0.00096	-0.00219	-0.00117
473	0.391342	0.224587	0.121844	0.070365	0.043112			237	3.45e-05	-0.00137	-0.00089	-0.00188	-0.00152
474	0.390147	0.226032	0.120586	0.071511	0.043095			237.5	-0.00051	0.001208	-0.00188	-0.00012	-0.00127
475	0.389165	0.22407	0.120034	0.070608	0.042365			238	-0.00082	-0.00043	-0.002	-0.00081	-0.00188
476	0.389703	0.223165	0.119466	0.069888	0.042029			238.5	0.000651	-0.00076	-0.00215	-0.00129	-0.00202
477	0.388132	0.223828	0.119166	0.069428	0.040971			239	-0.00035	0.000841	-0.00197	-0.00145	-0.00303
478	0.387987	0.222883	0.119174	0.070474	0.042079			239.5	0.000327	0.000459	-0.0014	0.000183	-0.00145
479	0.386774	0.220831	0.117876	0.068433	0.041172			240	-0.00025	-0.00131	-0.00246	-0.00188	-0.00228
480	0.385246	0.220274	0.117778	0.069085	0.041852			240.5	-0.00121	-0.00121	-0.00203	-0.00072	-0.00122
481	0.383871	0.219862	0.11829	0.06947	0.040643			241	-0.00198	-0.00095	-0.00086	0.000117	-0.0024
482	0.384247	0.21979	0.11622	0.067873	0.041013			241.5	-0.0007	-0.00027	-0.00287	-0.00142	-0.00172
483	0.384144	0.219628	0.117454	0.067664	0.041214			242	1.33e-05	0.0003	-0.00081	-0.00131	-0.00123
484	0.382719	0.218885	0.116228	0.067806	0.041088			242.5	-0.00083	0.000153	-0.00179	-0.00076	-0.00113
485	0.383103	0.217391	0.115254	0.06763	0.040593			243	0.000452	-0.00093	-0.00245	-0.0006	-0.00148
486	0.382445	0.216583	0.114979	0.067061	0.040518			243.5	0.000513	-0.00117	-0.00226	-0.00092	-0.00133
487	0.380917	0.216834	0.114662	0.065891	0.039728			244	-0.00045	-9.89e-05	-0.00212	-0.00196	-0.00202
488	0.380097	0.215679	0.113777	0.067095	0.040098			244.5	-0.00059	-0.00077	-0.00268	-0.00015	-0.00134
489	0.379355	0.215073	0.113997	0.066292	0.041004			245	-0.00063	-0.00076	-0.00189	-0.00075	-3.3e-05
490	0.378902	0.215743	0.114321	0.066133	0.039409			245.5	-0.00034	0.000824	-0.00097	-0.00058	-0.00169
491	0.377579	0.214225	0.113112	0.065807	0.038989			246	-0.00107	-0.0003	-0.00193	-0.00062	-0.00196
492	0.376972	0.21261	0.112885	0.065297	0.038998			246.5	-0.00096	-0.00155	-0.0017	-0.00087	-0.00172
493	0.377425	0.213337	0.113039	0.06446	0.038385			247	0.000385	9.76e-05	-0.00099	-0.00153	-0.00221
494	0.376665	0.21173	0.112317	0.063716	0.038956			247.5	0.000319	-0.00115	-0.00137	-0.00207	-0.0013
495	0.375751	0.212796	0.111846	0.0638	0.038813			248	5.62e-05	0.00091	-0.00144	-0.00161	-0.00124
496	0.373864	0.212206	0.111319	0.064477	0.03773			248.5	-0.00134	0.000923	-0.00158	-0.00046	-0.00231
497	0.373805	0.210139	0.10942	0.063975	0.038603			249	-0.00059	-0.0009	-0.00341	-0.00072	-0.00104
498	0.372823	0.209557	0.10989	0.063214	0.038217			249.5	-0.00094	-0.00088	-0.00233	-0.00128	-0.00128
499	0.372157	0.208273	0.110726	0.062896	0.037537			250	-0.0009	-0.00175	-0.00079	-0.00132	-0.00186
500	0.371918	0.208063	0.109387	0.063507	0.038016			250.5	-0.00037	-0.00127	-0.00194	-0.00025	-0.00107
501	0.370688	0.207417	0.109395	0.062403	0.037881			251	-0.00101	-0.00134	-0.00144	-0.00124	-0.00101
502	0.370987	0.207385	0.1083	0.062127	0.037411			251.5	0.000142	-0.00065	-0.00228	-0.00123	-0.00135
503	0.368852	0.206642	0.10916	0.061575	0.036672			252	-0.00156	-0.00085	-0.00074	-0.00156	-0.00201
504	0.369185	0.205947	0.107699	0.060864	0.037344			252.5	-0.00036	-0.00099	-0.00205	-0.00207	-0.001
505	0.368545	0.20493	0.107074	0.060772	0.037781			253	-0.00031	-0.00153	-0.00233	-0.00185	-0.00026
506	0.367034	0.204663	0.107407	0.061349	0.035891			253.5	-0.00128	-0.00114	-0.00142	-0.00084	-0.0023
507	0.367222	0.203557	0.106977	0.060412	0.035514			254	-0.00027	-0.0018	-0.00147	-0.00163	-0.00253
508	0.366009	0.203064	0.105987	0.060303	0.035808			254.5	-0.00089	-0.00169	-0.00221	-0.00144	-0.00197
509	0.365523	0.202919	0.105208	0.05971	0.036278			255	-0.00067	-0.00116	-0.00268	-0.00182	-0.0012
510	0.36507	0.202394	0.105484	0.059593	0.036211			255.5	-0.0004	-0.0011	-0.00186	-0.00165	-0.00107
511	0.364771	0.201037	0.103471	0.059434	0.03496			256	3.38e-05	-0.00208	-0.00386	-0.00151	-0.00235
512	0.364404	0.201465	0.104583	0.059659	0.03585			256.5	0.000394	-0.00084	-0.00201	-0.00093	-0.00108
513	0.363644	0.200762	0.10451	0.059291	0.03548			257	0.000293	-0.00102	-0.00163	-0.00105	-0.00132
514	0.362252	0.200803	0.104031	0.059409	0.035522			257.5	-0.00055	-0.00026	-0.00175	-0.00059	-0.00107
515	0.361843	0.20056	0.103447	0.058146	0.034884			258	-0.00025	0.000136	-0.002	-0.0018	-0.00162
516	0.360408	0.198461	0.103885	0.057217	0.03459			258.5	-0.00114	-0.00177	-0.00099	-0.00259	-0.00178
517	0.360169	0.198122	0.102083	0.058497	0.035262			259	-0.00063	-0.00149	-0.00275	-0.00075	-0.00077
518	0.359153	0.197007	0.102343	0.057619	0.034414			259.5	-0.00105	-0.00219	-0.00197	-0.00149	-0.00158
519	0.358649	0.197467	0.102075	0.057577	0.034313			260	-0.00085	-0.00093	-0.00184	-0.00123	-0.0015
520	0.358402	0.197177	0.101913	0.056757	0.034976			260.5	-0.00037	-0.0006	-0.00157	-0.00191	-0.00052
521	0.35771	0.196595	0.10132	0.056799	0.033977			261	-0.0004	-0.00063	-0.00185	-0.00156	-0.00152
522	0.356463	0.195884	0.100071	0.056849	0.033885			261.5	-0.00109	-0.00083	-0.00293	-0.0012	-0.00143
523	0.3552	0.194641	0.100541	0.057175	0.033188			262	-0.00179	-0.00169	-0.00189	-0.00051	-0.00206
524	0.355917	0.194221	0.100087	0.056523	0.033641			262.5	-0.00018	-0.00153	-0.002	-0.00099	-0.00133
525	0.355097	0.194019	0.100152	0.056347	0.033767			263	-0.00037	-0.00111	-0.00147	-0.00091	-0.001
526	0.355149	0.194027	0.099105	0.055728	0.033532			263.5	0.000456	-0.00042	-0.00232	-0.00135	-0.00108
527	0.354261	0.193244	0.098748	0.056623	0.033087			264	0.000184	-0.00072	-0.00231	1.1e-05	-0.00143
528	0.35304	0.191007	0.09792	0.055268	0.03281			264.5	-0.00047	-0.00282	-0.00288	-0.00131	-0.00157
529	0.351904	0.190853	0.097336	0.055068	0.033549			265	-0.00104	-0.00234	-0.00316	-0.00126	-0.0005
530	0.352468	0.191168	0.096979	0.055419	0.033474			265.5	0.000382	-0.00128	-0.00316	-0.00056	-0.00041
531	0.35064	0.191063	0.097384	0.054708	0.033356			266	-0.00099	-0.00075	-0.00222	-0.00112	-0.00036
532	0.35029	0.190587	0.096135	0.054557	0.03192			266.5	-0.00064	-0.00067	-0.00332	-0.00101	-0.00189
533	0.348105	0.18994	0.096467	0.055687	0.032013			267	-0.00244	-0.00082	-0.00248	0.000625	-0.0016
534	0.349001	0.189343	0.097555	0.054215	0.031971			267.5	-0.00063	-0.0009	-0.00071	-0.00085	-0.00147
535	0.347891	0.188471	0.095088	0.05296	0.032382			268	-0.00118	-0.00133	-0.00331	-0.00207	-0.0008
536	0.347661	0.188632	0.095153	0.053755	0.032063			268.5	-0.00069	-0.00047	-0.0028	-0.00085	-0.001
537	0.347165	0.188261	0.095339	0.053537	0.031878			269	-0.00052	-0.00028	-0.00214	-0.00082	-0.00104
538	0.344732	0.187283	0.095567	0.053203	0.03171			269.5	-0.00261	-0.00084	-0.00144	-0.00095	-0.00106
539	0.345697	0.187356	0.095185	0.053671	0.031593			270	-0.00073	-9.89e-05	-0.00148	-0.00011	-0.00103
540	0.345236	0.187453	0.094268	0.051622	0.03166			270.5	-0.00052	0.000666	-0.00219	-0.00229	-0.00078
541	0.344629	0.186145	0.092929	0.052366	0.031014			271	-0.00048	-0.00031	-0.00342	-0.00112	-0.00137
542	0.344126	0.184788	0.093773	0.052207	0.030762			271.5	-0.00032	-0.00135	-0.00196	-0.00105	-0.0015
543	0.343221	0.18419	0.093822	0.052015	0.030476			272	-0.00064	-0.00144	-0.00148	-0.001	-0.00167
544	0.342256	0.183027	0.093132	0.051797	0.03014			272.5	-0.00102	-0.00225	-0.00191	-0.00099	-0.0019
545	0.341223	0.183593	0.091915	0.051873	0.03051			273	-0.00149	-0.00091	-0.003	-0.00063	-0.00129
546	0.340318	0.183585	0.091955	0.050735	0.029998			273.5	-0.00181	-0.00029	-0.00253	-0.00173	-0.00173
547	0.340557	0.182349	0.091996	0.050493	0.030972			274	-0.00079	-0.00119	-0.00207	-0.00175	-0.0004
548	0.339617	0.180483	0.090965	0.051379	0.0303			274.5	-0.00115	-0.00286	-0.00293	-0.00043	-0.00104
549	0.339233	0.181073	0.0906	0.051028	0.029007			275	-0.00086	-0.0015	-0.00297	-0.00059	-0.00241
550	0.338038	0.181558	0.091063	0.051237	0.030451			275.5	-0.00152	-0.00028	-0.002	-8.19e-05	-0.00052
551	0.338354	0.180282	0.090202	0.050718	0.029586			276	-0.00042	-0.00124	-0.00266	-0.00044	-0.00139
552	0.337295	0.179248	0.090779	0.049372	0.028033			276.5	-0.00092	-0.0019	-0.00154	-0.00179	-0.00308
553	0.33668	0.180282	0.090673	0.049966	0.029007			277	-0.00091	7.71e-06	-0.00127	-0.00083	-0.00176
554	0.335681	0.179111	0.09017	0.049062	0.029368			277.5	-0.00135	-0.00083	-0.00149	-0.00165	-0.00117
555	0.33534	0.178392	0.089139	0.050041	0.029284			278	-0.00102	-0.0011	-0.00236	-0.00022	-0.00111
556	0.334025	0.177568	0.088685	0.048887	0.028814			278.5	-0.00183	-0.0015	-0.00252	-0.00136	-0.00151
557	0.334204	0.176567	0.08892	0.048293	0.029553			279	-0.0009	-0.00213	-0.00184	-0.00181	-0.00047
558	0.333624	0.176357	0.088725	0.048234	0.028319			279.5	-0.00085	-0.00178	-0.00168	-0.00163	-0.00179
559	0.333333	0.176042	0.089228	0.048142	0.02847			280	-0.00046	-0.00156	-0.00068	-0.00149	-0.00145
560	0.332266	0.176098	0.087922	0.047707	0.028545			280.5	-0.00099	-0.00088	-0.00189	-0.00176	-0.0012
561	0.332112	0.175161	0.08681	0.048109	0.028058			281	-0.00045	-0.00144	-0.00288	-0.00104	-0.00163
562	0.330473	0.174693	0.087216	0.048778	0.028587			281.5	-0.00164	-0.00141	-0.002	4.91e-06	-0.00085
563	0.330268	0.17441	0.087086	0.047967	0.027899			282	-0.00117	-0.00116	-0.00177	-0.00072	-0.00152
564	0.330217	0.173554	0.086664	0.04795	0.027764			282.5	-0.00051	-0.00162	-0.0019	-0.0005	-0.00153
565	0.327169	0.1737	0.085909	0.047431	0.027655			283	-0.00336	-0.00084	-0.00245	-0.00087	-0.0015
566	0.328134	0.172714	0.086883	0.04759	0.027152			283.5	-0.00152	-0.00146	-0.00087	-0.00045	-0.00195
567	0.328168	0.173425	0.085317	0.046511	0.027076			284	-0.00076	1.2e-05	-0.00242	-0.00149	-0.0019
568	0.326571	0.172496	0.085796	0.046369	0.027773			284.5	-0.00192	-0.00055	-0.00146	-0.00143	-0.00092
569	0.328757	0.171358	0.084862	0.046971	0.027899			285	0.001356	-0.00136	-0.00223	-0.00047	-0.00062
570	0.326247	0.171293	0.084708	0.045909	0.027672			285.5	-0.00087	-0.00085	-0.00204	-0.00151	-0.00074
571	0.325085	0.170833	0.085138	0.046629	0.026791			286	-0.00152	-0.00083	-0.00114	-0.00041	-0.00164
572	0.323745	0.170526	0.083491	0.045985	0.027563			286.5	-0.00238	-0.00063	-0.0028	-0.00095	-0.00058
573	0.323984	0.170227	0.083499	0.044144	0.02622			287	-0.0014	-0.00041	-0.00242	-0.00292	-0.00204
574	0.323514	0.168991	0.084002	0.045926	0.026388			287.5	-0.00125	-0.00136	-0.00143	-0.00056	-0.0017
575	0.323805	0.168192	0.083783	0.04524	0.026648			288	-0.00021	-0.00177	-0.00134	-0.00115	-0.00124
576	0.322302	0.168272	0.083304	0.044964	0.026539			288.5	-0.00126	-0.00109	-0.00156	-0.00125	-0.00123
577	0.322507	0.168321	0.082655	0.045039	0.02643			289	-0.00031	-0.00045	-0.00199	-0.00094	-0.00122
578	0.321491	0.167416	0.081722	0.044345	0.026681			289.5	-0.0008	-0.001	-0.00279	-0.00154	-0.00078
579	0.320432	0.166859	0.081933	0.044755	0.026354			290	-0.00134	-0.00112	-0.00217	-0.00083	-0.00104
580	0.319911	0.166463	0.081275	0.044914	0.025002			290.5	-0.00126	-0.00103	-0.00262	-0.00041	-0.0025
581	0.319143	0.165712	0.081267	0.043701	0.025498			291	-0.00147	-0.00139	-0.00227	-0.00164	-0.00177
582	0.319185	0.165753	0.081706	0.044303	0.026245			291.5	-0.00072	-0.00077	-0.00137	-0.00069	-0.00074
583	0.318366	0.164881	0.080853	0.043166	0.025472			292	-0.00099	-0.00129	-0.00207	-0.00184	-0.00153
584	0.317333	0.164921	0.080034	0.043091	0.026018			292.5	-0.0015	-0.00067	-0.00272	-0.00171	-0.00075
585	0.317563	0.164953	0.080172	0.043526	0.025405			293	-0.00053	-6.8e-05	-0.0022	-0.00096	-0.00134
586	0.315454	0.163855	0.078695	0.04325	0.025758			293.5	-0.00232	-0.00086	-0.00366	-0.00108	-0.00079
587	0.315915	0.162627	0.079871	0.043659	0.02517			294	-0.00109	-0.00182	-0.00187	-0.00037	-0.00136
588	0.315429	0.162579	0.080009	0.042664	0.024566			294.5	-0.00097	-0.00132	-0.00135	-0.00135	-0.00194
589	0.315804	0.1627	0.078192	0.042907	0.025338			295	0.000155	-0.00062	-0.00324	-0.00085	-0.00089
590	0.312978	0.161965	0.078946	0.042363	0.024918			295.5	-0.00247	-0.00097	-0.00197	-0.00128	-0.00126
591	0.3139	0.160172	0.078208	0.042196	0.025859			296	-0.0007	-0.00264	-0.00253	-0.00127	-1.17e-05
592	0.313473	0.160309	0.078476	0.043224	0.024322			296.5	-0.00052	-0.00192	-0.00186	0.000168	-0.00171
593	0.313098	0.160108	0.07777	0.043383	0.02407			297	-0.00028	-0.00161	-0.00238	0.000571	-0.00188
594	0.312176	0.160842	0.077526	0.042681	0.024112			297.5	-0.00068	-0.00016	-0.00234	-5.98e-05	-0.0017
595	0.311168	0.159704	0.077786	0.041343	0.025447			298	-0.00118	-0.00102	-0.00169	-0.00145	1.75e-05
596	0.310827	0.158727	0.077989	0.04161	0.02418			298.5	-0.0009	-0.00169	-0.0011	-0.00093	-0.00137
597	0.31022	0.158234	0.076357	0.042012	0.024625			299	-0.00093	-0.00175	-0.00278	-0.00025	-0.00072
598	0.309563	0.157862	0.076901	0.04074	0.024692			299.5	-0.00103	-0.00167	-0.00177	-0.00156	-0.00051
599	0.309571	0.157879	0.076544	0.040565	0.024633			300	-0.00035	-0.00111	-0.00188	-0.00157	-0.00045
600	0.308555	0.157717	0.076382	0.041501	0.02423			300.5	-0.00086	-0.00077	-0.00175	-0.00024	-0.00081
601	0.307573	0.157442	0.076284	0.040924	0.023718			301	-0.00134	-0.00057	-0.00153	-0.00073	-0.0013
602	0.307992	0.157079	0.075854	0.03977	0.023827			301.5	-0.00018	-0.00048	-0.00174	-0.00191	-0.00105
603	0.307795	0.156732	0.075708	0.040782	0.02308			302	0.000262	-0.00038	-0.00159	-0.0005	-0.00181
604	0.30584	0.156263	0.074856	0.039394	0.023416			302.5	-0.00136	-0.00043	-0.00231	-0.00197	-0.00129
605	0.306088	0.155141	0.075684	0.039779	0.023852			303	-0.0004	-0.00128	-0.00097	-0.00131	-0.00065
606	0.304875	0.155213	0.075522	0.04064	0.023869			303.5	-0.00115	-0.00066	-0.00084	-7.63e-05	-0.00051
607	0.304577	0.154382	0.074629	0.039737	0.023852			304	-0.00084	-0.00117	-0.00162	-0.00097	-0.00041
608	0.30327	0.154794	0.074637	0.039394	0.023693			304.5	-0.0017	-0.00014	-0.00129	-0.00118	-0.00048
609	0.304184	0.153501	0.073972	0.038992	0.022635			305	3.14e-05	-0.0012	-0.00179	-0.00147	-0.00163
610	0.303338	0.153203	0.073436	0.039461	0.022971			305.5	-0.0003	-0.00106	-0.00213	-0.00071	-0.00111
611	0.300905	0.152403	0.07346	0.039319	0.023676			306	-0.00249	-0.00153	-0.00178	-0.00069	-0.00016
612	0.301255	0.15212	0.073225	0.037813	0.023365			306.5	-0.00142	-0.00135	-0.00176	-0.0023	-0.00041
613	0.301298	0.152492	0.073436	0.039135	0.023222			307	-0.00071	-0.00037	-0.00118	-0.00052	-0.00047
614	0.300692	0.1512	0.072584	0.038934	0.0225			307.5	-0.00077	-0.00145	-0.00191	-0.00058	-0.00121
615	0.300196	0.151127	0.072495	0.039143	0.022458			308	-0.00069	-0.00103	-0.00172	-0.00014	-0.00114
616	0.299949	0.150651	0.072624	0.038507	0.023239			308.5	-0.00033	-0.0011	-0.00124	-0.00072	-0.0001
617	0.298992	0.149778	0.072754	0.037361	0.022492			309	-0.00079	-0.00168	-0.00078	-0.0019	-0.00087
618	0.297831	0.149003	0.071586	0.038005	0.023038			309.5	-0.00149	-0.00212	-0.0019	-0.00094	-0.00012
619	0.296482	0.14889	0.071342	0.037069	0.023055			310	-0.00242	-0.00175	-0.00189	-0.00187	1.4e-05
620	0.297661	0.149068	0.070652	0.03783	0.022979			310.5	-0.0004	-0.00102	-0.00244	-0.00078	4.15e-05
621	0.297806	0.148559	0.070344	0.037713	0.021888			311	0.000427	-0.00115	-0.00251	-0.00074	-0.00115
622	0.296115	0.147218	0.070019	0.036843	0.020804			311.5	-0.00091	-0.00231	-0.00261	-0.0016	-0.00234
623	0.295705	0.147703	0.069743	0.037754	0.021468			312	-0.00074	-0.0012	-0.00264	-0.00032	-0.00143
624	0.29422	0.146879	0.070587	0.036826	0.022777			312.5	-0.00184	-0.00172	-0.0013	-0.00126	0.000236
625	0.294638	0.146911	0.069662	0.03614	0.022618			313	-0.0007	-0.00117	-0.00214	-0.0019	0.000156
626	0.292683	0.147251	0.06993	0.036374	0.021174			313.5	-0.00235	-0.00026	-0.00151	-0.00144	-0.00146
627	0.293135	0.14511	0.069232	0.037002	0.021636			314	-0.00118	-0.00241	-0.00207	-0.00052	-0.0008
628	0.293024	0.145853	0.069378	0.03711	0.021988			314.5	-0.00067	-0.00099	-0.0016	-0.0002	-0.00028
629	0.292529	0.145498	0.068753	0.035914	0.021594			315	-0.00061	-0.00094	-0.00207	-0.00146	-0.00065
630	0.291223	0.144803	0.068177	0.035371	0.022391			315.5	-0.0015	-0.00131	-0.00248	-0.00194	0.000411
631	0.291001	0.145078	0.069281	0.035839	0.020956			316	-0.00112	-0.00047	-0.00083	-0.0012	-0.00119
632	0.290625	0.14381	0.068494	0.035831	0.021518			316.5	-0.00093	-0.00155	-0.00151	-0.00104	-0.00042
633	0.290745	0.143196	0.068088	0.036107	0.020603			317	-0.00015	-0.00183	-0.00171	-0.00054	-0.00141
634	0.289327	0.142825	0.067309	0.036174	0.020922			317.5	-0.00118	-0.0018	-0.00239	-0.00029	-0.00092
635	0.289746	0.143867	0.067999	0.035722	0.020939			318	-4.91e-05	-2.07e-05	-0.00124	-0.00065	-0.0008
636	0.289114	0.142421	0.067406	0.036006	0.020351			318.5	-0.00016	-0.00132	-0.00168	-0.00014	-0.0014
637	0.287739	0.142171	0.066725	0.035003	0.021065			319	-0.00114	-0.00115	-0.00224	-0.00117	-0.00045
638	0.286988	0.142235	0.067544	0.033748	0.020821			319.5	-0.00139	-0.00059	-0.00095	-0.0025	-0.00063
639	0.286159	0.141323	0.066416	0.033915	0.021048			320	-0.00173	-0.00124	-0.00205	-0.00214	-0.00026
640	0.286825	0.14062	0.066327	0.033447	0.020141			320.5	-0.00033	-0.00163	-0.00187	-0.00252	-0.00124
641	0.285425	0.140935	0.065937	0.034417	0.020133			321	-0.00134	-0.00076	-0.00208	-0.0012	-0.00115
642	0.284785	0.140354	0.06614	0.034392	0.020192			321.5	-0.00146	-0.00101	-0.00155	-0.00106	-0.00099
643	0.284759	0.139707	0.065507	0.033773	0.020712			322	-0.00087	-0.00133	-0.00204	-0.00164	-0.00027
644	0.284862	0.138641	0.06653	0.033522	0.020972			322.5	-0.00013	-0.00218	-0.0005	-0.00178	0.000137
645	0.28353	0.137931	0.064858	0.033589	0.01936			323	-0.00107	-0.00258	-0.00228	-0.00154	-0.00168
646	0.283333	0.138512	0.065556	0.034459	0.019705			323.5	-0.00067	-0.00139	-0.00115	-0.00034	-0.00118
647	0.282471	0.138609	0.064777	0.033832	0.020217			324	-0.00107	-0.00081	-0.00183	-0.00092	-0.00047
648	0.281429	0.137503	0.064314	0.034693	0.020443			324.5	-0.00166	-0.00171	-0.00212	0.000266	-0.00011
649	0.281327	0.13701	0.064728	0.033188	0.020569			325	-0.00116	-0.00185	-0.00134	-0.00137	0.000146
650	0.279995	0.136994	0.063876	0.032811	0.020578			325.5	-0.00211	-0.00141	-0.00212	-0.00166	0.000247
651	0.280106	0.136267	0.064395	0.033907	0.02046			326	-0.00137	-0.00184	-0.00121	-0.00019	0.000203
652	0.279226	0.136017	0.063162	0.033121	0.019083			326.5	-0.00178	-0.00168	-0.00245	-0.00098	-0.00134
653	0.279448	0.136348	0.063357	0.031983	0.01994			327	-0.0009	-0.00081	-0.00195	-0.00218	-0.00023
654	0.278219	0.135492	0.063146	0.033297	0.019663			327.5	-0.00174	-0.00142	-0.00193	-0.00046	-0.00047
655	0.278458	0.134983	0.063267	0.032954	0.019428			328	-0.00085	-0.00159	-0.00152	-0.00071	-0.00066
656	0.277194	0.134878	0.063673	0.032903	0.018479			328.5	-0.00171	-0.00126	-0.00076	-0.00061	-0.0017
657	0.276656	0.134183	0.062505	0.032075	0.019318			329	-0.00173	-0.00167	-0.00193	-0.00145	-0.00061
658	0.277117	0.134353	0.061936	0.031933	0.018563			329.5	-0.00058	-0.001	-0.00236	-0.00147	-0.00141
659	0.27611	0.133739	0.062237	0.032042	0.019377			330	-0.00115	-0.00131	-0.00173	-0.00118	-0.00035
660	0.275948	0.131963	0.06175	0.031657	0.018571			330.5	-0.00074	-0.00306	-0.00206	-0.00149	-0.00123
661	0.275051	0.132431	0.062342	0.03139	0.019428			331	-0.00119	-0.00202	-0.00108	-0.00166	-0.00011
662	0.274214	0.132568	0.061571	0.032853	0.019075			331.5	-0.00157	-0.0014	-0.00176	0.000238	-0.00045
663	0.27418	0.132148	0.061425	0.031548	0.019428			332	-0.001	-0.00147	-0.00168	-0.00117	6.44e-05
664	0.273241	0.132294	0.061563	0.031072	0.01889			332.5	-0.0015	-0.00085	-0.00125	-0.00158	-0.00048
665	0.273062	0.131753	0.060955	0.031548	0.019209			333	-0.00111	-0.00107	-0.00175	-0.00087	-1.73e-05
666	0.272754	0.131825	0.061141	0.031289	0.018017			333.5	-0.00087	-0.00053	-0.00126	-0.00104	-0.00135
667	0.2712	0.13122	0.060322	0.031808	0.017824			334	-0.00209	-0.00084	-0.00201	-0.00027	-0.0015
668	0.271038	0.13063	0.060857	0.03093	0.018412			334.5	-0.00168	-0.00113	-0.0011	-0.00117	-0.00071
669	0.271021	0.130137	0.060005	0.03113	0.017387			335	-0.00111	-0.0013	-0.00189	-0.00079	-0.00185
670	0.27068	0.131357	0.060378	0.030988	0.018143			335.5	-0.00091	0.000651	-0.00118	-0.00081	-0.00085
671	0.269749	0.130049	0.059567	0.030503	0.017606			336	-0.0014	-0.00054	-0.00192	-0.00125	-0.00141
672	0.268315	0.128926	0.05934	0.030628	0.018026			336.5	-0.0025	-0.00149	-0.00196	-0.00095	-0.00082
673	0.269416	0.128716	0.058585	0.030645	0.018563			337	-0.00061	-0.00131	-0.00263	-0.00079	-0.0001
674	0.268434	0.128886	0.059469	0.030444	0.018999			337.5	-0.00117	-0.00067	-0.00129	-0.00088	0.000495
675	0.267708	0.12782	0.059056	0.030921	0.017513			338	-0.00142	-0.00156	-0.00157	-0.00017	-0.00118
676	0.267871	0.127375	0.058796	0.029633	0.017706			338.5	-0.00065	-0.00167	-0.00164	-0.00157	-0.00087
677	0.266607	0.127133	0.059258	0.030461	0.017958			339	-0.00154	-0.00154	-0.00082	-0.00044	-0.00049
678	0.266342	0.126972	0.058349	0.03098	0.016405			339.5	-0.00126	-0.00131	-0.00169	0.000315	-0.00226
679	0.26612	0.126107	0.058341	0.029366	0.018546			340	-0.00094	-0.00195	-0.00146	-0.00148	0.000371
680	0.265198	0.126059	0.058187	0.03006	0.017404			340.5	-0.00143	-0.00159	-0.00141	-0.00051	-0.00091
681	0.26443	0.12551	0.057692	0.030001	0.017337			341	-0.00175	-0.00184	-0.00177	-0.00043	-0.0009
682	0.264583	0.124912	0.057514	0.029583	0.017077			341.5	-0.00098	-0.00215	-0.00175	-0.0008	-0.00113
683	0.263465	0.125033	0.058195	0.030528	0.018328			342	-0.00171	-0.00159	-0.00067	0.00047	0.000436
684	0.263303	0.124492	0.05757	0.029566	0.016665			342.5	-0.00133	-0.00183	-0.00119	-0.00055	-0.00146
685	0.263661	0.124201	0.057441	0.029215	0.016707			343	-0.00032	-0.00177	-0.00112	-0.00083	-0.00134
686	0.262338	0.123709	0.056191	0.028629	0.017186			343.5	-0.00129	-0.00196	-0.00242	-0.0014	-0.00069
687	0.262526	0.124436	0.057067	0.028897	0.017497			344	-0.0005	-0.00064	-0.0011	-0.00094	-0.00023
688	0.261492	0.123039	0.056718	0.028939	0.017497			344.5	-0.00113	-0.00195	-0.0013	-0.00076	-0.00016
689	0.261185	0.122223	0.057027	0.028529	0.017992			345	-0.00091	-0.00254	-0.00068	-0.00112	0.00051
690	0.260647	0.122982	0.056369	0.028512	0.017807			345.5	-0.00097	-0.0012	-0.00126	-0.00101	0.000363
691	0.260681	0.122239	0.05684	0.028588	0.017564			346	-0.00035	-0.0017	-0.00044	-0.00078	0.000147
692	0.260118	0.122578	0.056808	0.028471	0.017329			346.5	-0.00044	-0.00086	-0.00025	-0.00079	-5.53e-05
693	0.257932	0.120947	0.055712	0.027525	0.017438			347	-0.00243	-0.00248	-0.00136	-0.00179	0.000157
694	0.257573	0.121536	0.055728	0.027944	0.01664			347.5	-0.00228	-0.00134	-0.00112	-0.00116	-0.00072
695	0.257497	0.121294	0.055412	0.027191	0.017253			348	-0.0018	-0.00123	-0.00128	-0.00193	8.63e-05
696	0.257078	0.121084	0.055639	0.027659	0.016388			348.5	-0.00172	-0.00108	-0.00077	-0.00124	-0.00087
697	0.258145	0.121189	0.055826	0.027525	0.01659			349	9.86e-05	-0.00055	-0.00031	-0.00128	-0.00056
698	0.25724	0.120099	0.054714	0.02786	0.017136			349.5	-0.00039	-0.00149	-0.00145	-0.00075	0.000172
699	0.257138	0.119509	0.054535	0.027944	0.016279			350	5.18e-05	-0.00181	-0.00144	-0.00052	-0.00077
700	0.256054	0.119396	0.054503	0.027216	0.015364			350.5	-0.00065	-0.00155	-0.00126	-0.00126	-0.00179
701	0.255131	0.119081	0.055185	0.028069	0.016581			351	-0.00116	-0.00153	-0.00019	-0.00012	-0.00027
702	0.254636	0.119517	0.054	0.028337	0.016296			351.5	-0.00118	-0.00059	-0.00143	0.000324	-0.00054
703	0.253868	0.118467	0.053423	0.027551	0.01622			352	-0.00152	-0.00149	-0.00192	-0.00049	-0.00056
704	0.253578	0.119033	0.054665	0.027183	0.016472			352.5	-0.0013	-0.0004	-0.00016	-0.0008	-0.00018
705	0.253057	0.117587	0.053261	0.027141	0.016229			353	-0.00135	-0.00179	-0.00167	-0.00073	-0.0004
706	0.253125	0.117369	0.053456	0.0275	0.015885			353.5	-0.0007	-0.00167	-0.00122	-0.00017	-0.00074
707	0.2521	0.117353	0.053253	0.026898	0.016069			354	-0.00135	-0.00129	-0.00124	-0.00078	-0.00045
708	0.251938	0.116667	0.052506	0.026672	0.015742			354.5	-0.00098	-0.00174	-0.00194	-0.00093	-0.00077
709	0.25105	0.116206	0.05331	0.026363	0.016262			355	-0.00147	-0.00192	-0.00073	-0.00117	-7.53e-05
710	0.252357	0.116804	0.053456	0.026572	0.015431			355.5	0.000615	-0.00079	-0.00033	-0.0008	-0.001
711	0.251144	0.11615	0.052076	0.026329	0.016556			356	-0.00025	-0.00121	-0.00182	-0.00097	0.000413
712	0.24965	0.115011	0.053237	0.02602	0.01633			356.5	-0.00145	-0.00223	-0.00018	-0.00122	0.000208
713	0.249863	0.115189	0.052709	0.026095	0.01622			357	-0.00063	-0.00162	-0.00061	-0.00101	0.000153
714	0.25	0.114607	0.052466	0.025142	0.015792			357.5	7.67e-05	-0.00195	-0.0007	-0.00203	-0.00029
715	0.247891	0.114098	0.051735	0.026614	0.015414			358	-0.00185	-0.0022	-0.00138	-0.00015	-0.00067
716	0.248173	0.114405	0.052596	0.025995	0.01596			358.5	-0.00097	-0.00143	-0.0001	-0.00077	5.11e-05
717	0.247413	0.113743	0.050656	0.024983	0.015121			359	-0.0013	-0.00186	-0.00229	-0.00187	-0.00088
718	0.247362	0.114236	0.052117	0.025543	0.01528			359.5	-0.00082	-0.00087	-0.00028	-0.00109	-0.00063
719	0.246969	0.114324	0.051573	0.025819	0.014273			360	-0.00073	-0.00038	-0.00073	-0.00064	-0.00176
720	0.246704	0.11279	0.051646	0.024506	0.01575			360.5	-0.0005	-0.0019	-0.00043	-0.00209	6.29e-05
721	0.245842	0.112572	0.050656	0.025518	0.015339			361	-0.00097	-0.00179	-0.00144	-0.00077	-0.00035
722	0.246363	0.112023	0.050096	0.025669	0.01533			361.5	0.000196	-0.00209	-0.00192	-0.00047	-0.0003
723	0.244962	0.111684	0.051224	0.025225	0.014726			362	-0.0009	-0.00214	-0.00033	-0.00088	-0.00095
724	0.244604	0.112725	0.051062	0.02556	0.015129			362.5	-0.00078	-0.00046	-0.00032	-0.00037	-0.00041
725	0.243571	0.112273	0.05124	0.024974	0.016296			363	-0.00145	-0.00065	0.0001	-0.00095	0.001043
726	0.242922	0.111562	0.049447	0.024657	0.015095			363.5	-0.00167	-0.00115	-0.0019	-0.00122	-0.00032
727	0.242256	0.111651	0.049836	0.0252	0.014709			364	-0.00191	-0.00067	-0.00122	-0.00047	-0.00071
728	0.243622	0.11023	0.049885	0.023904	0.015154			364.5	0.00023	-0.00206	-0.00095	-0.0019	-0.00012
729	0.242205	0.111054	0.049901	0.025292	0.014667			365	-0.0009	-0.00066	-0.00073	-0.00013	-0.00063
730	0.242153	0.110723	0.050737	0.025125	0.015213			365.5	-0.00042	-0.0007	0.000504	-0.00022	8.24e-05
731	0.242341	0.10935	0.04935	0.024289	0.015112			366	0.000333	-0.00204	-0.001	-0.00111	1.71e-05
732	0.241078	0.10943	0.049471	0.023477	0.014953			366.5	-0.00061	-0.00157	-0.00066	-0.00197	-0.00011
733	0.240548	0.109818	0.048619	0.024958	0.01439			367	-0.0007	-0.00073	-0.0015	-8.88e-05	-0.00071
734	0.23978	0.109083	0.048465	0.023151	0.015129			367.5	-0.00106	-0.00126	-0.0015	-0.00214	0.000229
735	0.239438	0.108962	0.048708	0.023536	0.015582			368	-0.00093	-0.00105	-0.00099	-0.00158	0.000835
736	0.239225	0.108905	0.048424	0.024473	0.014399			368.5	-0.00065	-0.00075	-0.00115	-0.00034	-0.00052
737	0.238781	0.108114	0.048278	0.024205	0.015037			369	-0.00063	-0.00137	-0.00113	-0.00056	0.000306
738	0.238789	0.107242	0.048441	0.024841	0.013719			369.5	-0.0001	-0.00209	-0.00074	0.000312	-0.0012
739	0.237252	0.107864	0.048327	0.023703	0.014852			370	-0.00137	-0.00096	-0.00068	-0.00095	0.000211
740	0.238388	0.107977	0.047418	0.024615	0.014441			370.5	0.000484	-0.00046	-0.00161	0.000245	-0.00022
741	0.23668	0.10729	0.04711	0.024121	0.014155			371	-0.00099	-0.00094	-0.00179	-0.00024	-0.0005
742	0.235758	0.106886	0.047256	0.022265	0.014776			371.5	-0.00153	-0.00109	-0.00141	-0.00235	0.000302
743	0.235425	0.106426	0.047881	0.023017	0.014239			372	-0.00141	-0.0013	-0.00045	-0.00135	-0.00028
744	0.235442	0.106184	0.046639	0.023653	0.013567			372.5	-0.00086	-0.00125	-0.00179	-0.00048	-0.00102
745	0.23522	0.105788	0.046939	0.022298	0.014247			373	-0.00059	-0.00138	-0.00123	-0.002	-0.00016
746	0.234213	0.106063	0.047548	0.022909	0.01502			373.5	-0.00126	-0.00069	-0.00029	-0.00116	0.000827
747	0.234162	0.105554	0.046696	0.023201	0.014676			374	-0.00079	-0.00097	-0.00115	-0.00071	0.00048
748	0.233752	0.105465	0.046258	0.023377	0.014256			374.5	-0.00075	-0.00072	-0.0015	-0.00039	3.81e-05
749	0.232599	0.104496	0.045998	0.023561	0.014365			375	-0.00158	-0.00157	-0.00163	-7.54e-05	0.000225
750	0.233316	0.104351	0.046379	0.022758	0.013945			375.5	-0.00022	-0.0014	-0.00098	-0.00093	-0.00022
751	0.232155	0.103818	0.045779	0.023318	0.014155			376	-0.00107	-0.00171	-0.00152	-0.00017	9.31e-05
752	0.232223	0.103801	0.046225	0.023352	0.013828			376.5	-0.00047	-0.00138	-0.00079	-2.26e-05	-0.00024
753	0.230866	0.104779	0.046168	0.023059	0.014155			377	-0.00155	0.000177	-0.00067	-0.00028	0.000206
754	0.230627	0.103753	0.04612	0.023076	0.013441			377.5	-0.00131	-0.00075	-0.00055	-0.00015	-0.00059
755	0.230832	0.10242	0.045641	0.022524	0.014508			378	-0.00056	-0.00206	-0.00096	-0.00072	0.000741
756	0.229944	0.102542	0.045032	0.022465	0.014222			378.5	-0.00108	-0.00156	-0.00152	-0.00069	0.000459
757	0.230157	0.10158	0.045268	0.023118	0.013299			379	-0.00032	-0.00241	-0.00105	0.000195	-0.00059
758	0.229372	0.102404	0.044594	0.022248	0.013559			379.5	-0.00073	-0.00104	-0.0017	-0.00075	-0.00022
759	0.227758	0.10242	0.044764	0.022432	0.013752			380	-0.00211	-0.00068	-0.0013	-0.00043	6.2e-05
760	0.229466	0.101435	0.044975	0.02147	0.014113			380.5	0.000405	-0.00156	-0.00086	-0.00148	0.000549
761	0.228697	0.101169	0.044578	0.021378	0.013509			381	1.54e-05	-0.00155	-0.00117	-0.00149	-0.00011
762	0.227946	0.101823	0.044659	0.022047	0.013517			381.5	-0.00036	-0.0004	-0.00089	-0.0006	-4.89e-05
763	0.228023	0.100498	0.043872	0.021863	0.013542			382	0.000232	-0.0017	-0.00168	-0.00073	3.2e-05
764	0.226358	0.100183	0.043782	0.022139	0.013215			382.5	-0.00121	-0.00175	-0.00161	-0.0003	-0.0003
765	0.226383	0.100846	0.044724	0.022022	0.013483			383	-0.00068	-0.0006	-0.00027	-0.00034	7.63e-05
766	0.225956	0.09999	0.044521	0.022039	0.013861			383.5	-0.00066	-0.00133	-0.00035	-0.00023	0.000574
767	0.226315	0.100175	0.044391	0.021286	0.014214			384	0.000254	-0.00076	-0.00033	-0.00103	0.001052
768	0.224582	0.100046	0.044602	0.021754	0.013332			384.5	-0.00127	-0.00058	0.000105	-0.00038	5.39e-05
769	0.224513	0.099844	0.043214	0.020826	0.013089			385	-0.00084	-0.00051	-0.00143	-0.0014	-0.00019
770	0.224761	0.099392	0.044026	0.021679	0.01319			385.5	-5.41e-05	-0.00073	-0.00026	-0.00029	-6.81e-06
771	0.223207	0.099206	0.043377	0.02188	0.013551			386	-0.00137	-0.00063	-0.00088	4.71e-05	0.00047
772	0.222976	0.098649	0.042338	0.022332	0.013458			386.5	-0.00115	-0.00099	-0.00199	0.000676	0.000411
773	0.222029	0.098043	0.043677	0.020575	0.012694			387	-0.00176	-0.00142	-0.00016	-0.00133	-0.00044
774	0.222883	0.097446	0.043442	0.021035	0.013844			387.5	-0.00026	-0.00183	-0.00028	-0.00069	0.00098
775	0.222003	0.097179	0.0428	0.020684	0.013206			388	-0.00079	-0.00184	-0.0009	-0.00101	0.000271
776	0.222208	0.096606	0.042995	0.021378	0.012266			388.5	-5.71e-05	-0.00221	-0.00049	-9.1e-05	-0.0008
777	0.22196	0.097437	0.043084	0.021453	0.013979			389	0.000152	-0.00086	-0.0002	8.29e-05	0.001297
778	0.220517	0.096549	0.04306	0.021964	0.012585			389.5	-0.00105	-0.00163	-6.58e-05	0.000783	-0.00032
779	0.221004	0.095903	0.042711	0.021161	0.012652			390	1.7e-05	-0.00211	-0.00033	-8.31e-05	-0.00018
780	0.219997	0.095911	0.042492	0.021077	0.012384			390.5	-0.00067	-0.00178	-0.00043	-9.63e-05	-0.00045
781	0.220236	0.09617	0.042508	0.019488	0.012291			391	9.55e-05	-0.00114	-0.00025	-0.00191	-0.00052
782	0.219493	0.09604	0.042346	0.020425	0.012308			391.5	-0.00028	-0.00098	-0.00027	-0.0007	-0.00044
783	0.218383	0.09583	0.042451	0.020324	0.012258			392	-0.00109	-0.00092	2.6e-05	-0.00073	-0.00045
784	0.218852	0.095192	0.040926	0.02111	0.013173			392.5	-4.8e-05	-0.00139	-0.00169	0.000295	0.000689
785	0.217461	0.09537	0.041851	0.021303	0.012308			393	-0.00119	-0.00085	-0.00039	0.000619	-0.00029
786	0.216428	0.096299	0.043011	0.019789	0.013274			393.5	-0.00191	0.000609	0.001215	-0.0011	0.000902
787	0.215984	0.095515	0.041494	0.020659	0.013114			394	-0.00194	-3.82e-05	-0.00049	2e-05	0.000763
788	0.215898	0.095055	0.041291	0.020926	0.012199			394.5	-0.00157	-0.00029	-0.00058	0.000431	-0.00028
789	0.217358	0.093763	0.041664	0.019672	0.011813			395	0.000636	-0.00158	3.74e-05	-0.00099	-0.00069
790	0.215762	0.094054	0.040893	0.020701	0.012577			395.5	-0.00075	-0.0009	-0.00074	0.000326	0.000268
791	0.215412	0.094215	0.041323	0.020098	0.012174			396	-0.00068	-0.00039	-5.73e-05	-0.00031	-0.00016
792	0.213619	0.093957	0.041242	0.019597	0.012518			396.5	-0.00229	-0.0004	4.22e-06	-0.00082	0.000293
793	0.213977	0.092705	0.040966	0.019262	0.011628			397	-0.0014	-0.00164	-0.00017	-0.00114	-0.00072
794	0.213832	0.093117	0.040601	0.019262	0.012543			397.5	-0.00109	-0.00082	-0.00046	-0.00105	0.000424
795	0.214225	0.093303	0.04082	0.018969	0.013064			398	-0.00014	-0.00028	-3.41e-05	-0.00132	0.001086
796	0.212602	0.092802	0.040561	0.019111	0.011913			398.5	-0.00156	-0.00059	-0.00019	-0.00106	-0.00024
797	0.212978	0.093165	0.03979	0.018702	0.012308			399	-0.00064	0.000165	-0.00098	-0.00147	0.000289
798	0.212346	0.09193	0.039725	0.019597	0.011561			399.5	-0.0009	-0.00106	-0.0009	-0.00032	-0.00056
799	0.212637	0.091154	0.039855	0.019513	0.01256			400	-8.82e-05	-0.00171	-0.00059	-0.00034	0.000673
800	0.211791	0.092115	0.040106	0.019806	0.01256			400.5	-0.0006	-0.00022	-0.00012	9.46e-05	0.000726
801	0.210613	0.091913	0.03923	0.019195	0.012249			401	-0.00151	-0.00017	-0.00105	-0.00055	0.000401
802	0.211245	0.091453	0.039262	0.019137	0.011712			401.5	-0.0003	-0.00043	-0.00085	-0.00054	-0.00019
803	0.210844	0.090831	0.039676	0.019028	0.011712			402	-0.00028	-0.0009	-0.00018	-0.00059	-0.00015
804	0.20952	0.090815	0.03936	0.019571	0.011149			402.5	-0.00137	-0.00062	-0.00042	0.000141	-0.00078
805	0.20923	0.091219	0.039416	0.019362	0.012862			403	-0.00123	0.000185	-0.00019	-2.91e-05	0.001308
806	0.209264	0.08983	0.039668	0.019245	0.012048			403.5	-0.00072	-0.00124	0.000269	-8.48e-05	0.000383
807	0.209238	0.089741	0.0394	0.019019	0.011813			404	-0.00028	-0.00105	9.83e-05	-0.00028	0.000151
808	0.208914	0.089281	0.038589	0.017982	0.011746			404.5	-0.0002	-0.00131	-0.00075	-0.00144	0.000122
809	0.208888	0.090258	0.038369	0.018208	0.012056			405	0.000246	0.000186	-0.00087	-0.00109	0.000532
810	0.208299	0.08941	0.038085	0.018292	0.011636			405.5	2.98e-05	-0.00057	-0.00107	-0.00092	8e-05
811	0.207112	0.088505	0.038483	0.019245	0.011326			406	-0.0009	-0.00139	-0.00043	0.000306	-0.00025
812	0.206045	0.08857	0.038524	0.018551	0.011594			406.5	-0.00168	-0.00101	-0.00023	-0.00045	0.000116
813	0.205063	0.088861	0.037883	0.018258	0.012216			407	-0.00236	-0.00036	-0.00087	-0.00072	0.000901
814	0.206532	0.088037	0.038978	0.017623	0.011208			407.5	-0.00018	-0.00108	0.000631	-0.0014	-0.00025
815	0.205072	0.087892	0.038662	0.019095	0.01094			408	-0.00142	-0.00097	0.000389	0.000441	-0.00053
816	0.205294	0.088384	0.038094	0.018442	0.011813			408.5	-0.0007	-6.59e-05	-0.00016	-0.00026	0.000545
817	0.204645	0.087617	0.03828	0.01738	0.01183			409	-0.001	-0.00073	0.000219	-0.00146	0.000617
818	0.20397	0.087383	0.037972	0.018359	0.011502			409.5	-0.00133	-0.00073	-1.56e-05	-0.00021	0.000261
819	0.202544	0.087698	0.037891	0.018693	0.011687			410	-0.00253	-5.3e-05	3.12e-05	0.000262	0.000528
820	0.203629	0.086607	0.037834	0.017397	0.011401			410.5	-0.00081	-0.00111	0.000104	-0.00121	0.000227
821	0.203842	0.086115	0.036771	0.017915	0.01104			411	-9.6e-05	-0.00143	-0.00106	-0.00051	-0.00016
822	0.203142	0.087019	0.037469	0.018451	0.010553			411.5	-0.00046	-2.57e-05	-5.33e-05	0.000195	-0.0007
823	0.202587	0.086672	0.036479	0.017631	0.011687			412	-0.00065	-0.00016	-0.00113	-0.00071	0.000699
824	0.200615	0.086204	0.037014	0.017363	0.011015			412.5	-0.0025	-0.00047	-0.00032	-0.00095	-6.46e-05
825	0.201366	0.085824	0.037501	0.017882	0.01078			413	-0.00116	-0.00065	0.000425	-0.00026	-0.0003
826	0.202083	0.083983	0.036787	0.017313	0.011939			413.5	0.00013	-0.00264	-0.00031	-0.00086	0.001118
827	0.200897	0.084677	0.037136	0.017179	0.011116			414	-0.0008	-0.0015	0.000258	-0.00095	0.000184
828	0.201084	0.085695	0.036584	0.017539	0.011124			414.5	-0.00013	4.36e-05	-0.00028	-0.00044	0.000232
829	0.200675	0.086341	0.036641	0.018225	0.011746			415	-0.00016	0.001122	-7.04e-05	0.000445	0.001017
830	0.200248	0.085291	0.036625	0.017414	0.011628			415.5	-0.00021	0.000101	4.95e-05	-0.00045	0.000919
831	0.19959	0.084613	0.036714	0.017748	0.010965			416	-0.00052	-0.00045	0.000302	1.78e-05	0.000161
832	0.198267	0.083417	0.035984	0.017748	0.010889			416.5	-0.00162	-0.00165	-0.00045	9.7e-05	0.00012
833	0.198625	0.084023	0.035635	0.01728	0.010679			417	-0.00076	-0.00062	-0.00074	-0.00039	-9.46e-05
834	0.198677	0.083272	0.034726	0.017623	0.01193			417.5	-0.00025	-0.00127	-0.00172	8.53e-05	0.001436
835	0.197328	0.083377	0.035862	0.017255	0.011385			418	-0.00137	-0.00087	-0.00019	-0.00029	0.000822
836	0.197857	0.083611	0.035943	0.01687	0.010688			418.5	-0.00031	-0.00031	4.8e-05	-0.00067	3.93e-05
837	0.196721	0.082949	0.036065	0.016912	0.011771			419	-0.00119	-0.00084	0.000336	-0.00055	0.001362
838	0.196448	0.082949	0.035805	0.017037	0.011267			419.5	-0.00106	-0.00057	0.000154	-0.00033	0.000805
839	0.196747	0.083086	0.03501	0.017338	0.011065			420	-0.00027	-0.00013	-0.00069	9.99e-05	0.000603
840	0.196858	0.081867	0.035415	0.016845	0.011754			420.5	0.000309	-0.00136	-4.93e-05	-0.00042	0.001467
841	0.196098	0.082917	0.035123	0.016678	0.010663			421	-0.00014	0.000213	-0.00028	-0.00055	0.000197
842	0.1955	0.08194	0.035229	0.01723	0.009924			421.5	-0.00039	-0.00073	-1.14e-05	0.000175	-0.00064
843	0.194271	0.081503	0.03544	0.01646	0.010041			422	-0.00139	-0.001	0.000386	-0.00067	-0.00046
844	0.194817	0.08139	0.036755	0.015975	0.010016			422.5	-0.00031	-0.00086	0.002144	-0.00118	-0.00045
845	0.194331	0.081293	0.035846	0.016243	0.011359			423	-0.00044	-0.00072	0.001155	-0.0008	0.001185
846	0.193622	0.081124	0.034474	0.016335	0.010352			423.5	-0.00083	-0.00066	-0.0004	-0.00061	2.66e-05
847	0.192811	0.08076	0.035854	0.015916	0.010856			424	-0.00134	-0.00084	0.001436	-0.00105	0.000665
848	0.192418	0.080664	0.03458	0.016293	0.010637			424.5	-0.00136	-0.00069	4.16e-07	-0.00054	0.000436
849	0.191581	0.08097	0.034474	0.017112	0.010167			425	-0.0019	-4.64e-05	1.57e-06	0.000516	-7.95e-05
850	0.192375	0.080922	0.034726	0.016268	0.010713			425.5	-0.00054	0.000163	0.000436	-0.00043	0.000604
851	0.192384	0.079347	0.034661	0.016862	0.010369			426	-8.64e-05	-0.00152	0.000486	0.000349	0.000231
852	0.191778	0.080486	0.03333	0.016427	0.010293			426.5	-0.00036	0.000152	-0.00102	-0.0001	0.000183
853	0.190932	0.079452	0.033606	0.017062	0.010587			427	-0.00092	-0.00087	-0.00055	0.000721	0.000565
854	0.189677	0.079799	0.033468	0.016719	0.010646			427.5	-0.00195	-0.00017	-0.00058	0.000376	0.000671
855	0.189711	0.079371	0.034076	0.016209	0.011603			428	-0.00147	-0.00044	0.000287	-0.00016	0.001845
856	0.189848	0.078604	0.033111	0.016694	0.011141			428.5	-0.00088	-0.00113	-0.00077	0.000477	0.001331
857	0.189558	0.078233	0.033549	0.016577	0.010268			429	-0.0008	-0.00132	-0.0001	0.000408	0.000335
858	0.189942	0.079097	0.034239	0.015891	0.010385			429.5	8.95e-05	1.82e-06	0.000876	-0.00035	0.000512
859	0.188704	0.078015	0.033168	0.015406	0.01104			430	-0.00093	-0.00107	-0.00031	-0.00087	0.001325
860	0.188712	0.078071	0.034352	0.015958	0.011754			430.5	-0.00049	-0.00075	0.001277	-0.00014	0.002207
861	0.188371	0.077546	0.032437	0.015582	0.010755			431	-0.00046	-0.00114	-0.00096	-0.00053	0.001056
862	0.187372	0.078023	0.033922	0.015231	0.010016			431.5	-0.0012	-0.00029	0.000998	-0.00089	0.000216
863	0.187739	0.078257	0.033573	0.015381	0.010268			432	-0.00034	0.000255	0.00069	-0.00064	0.00055
864	0.187534	0.077352	0.033062	0.015364	0.010033			432.5	-0.00016	-0.0006	0.000191	-0.0006	0.000299
865	0.18645	0.077465	0.033581	0.015298	0.009999			433	-0.001	-0.00022	0.000955	-0.00062	0.000296
866	0.186936	0.077021	0.033273	0.01503	0.009857			433.5	-2.5e-06	-0.00051	0.000696	-0.00087	0.000162
867	0.18592	0.07648	0.033362	0.015289	0.009815			434	-0.00077	-0.00092	0.00093	-0.0005	0.000151
868	0.186066	0.076868	0.0332	0.016226	0.010377			434.5	-0.00017	-0.00019	0.000859	0.00068	0.000856
869	0.184119	0.076294	0.03195	0.015448	0.010201			435	-0.00203	-0.00065	-0.00056	-0.00018	0.000678
870	0.184998	0.076787	0.031707	0.015649	0.010268			435.5	-0.00058	0.000218	-0.00073	0.00012	0.000791
871	0.184887	0.076432	0.03182	0.015891	0.009445			436	-0.00029	3.09e-05	-0.00048	0.000467	-0.00015
872	0.183974	0.07539	0.032218	0.015356	0.010411			436.5	-0.00094	-0.00101	0.000136	-0.00011	0.001027
873	0.182633	0.075374	0.032283	0.015691	0.010276			437	-0.00209	-0.00078	0.000334	0.000356	0.000899
874	0.183299	0.074728	0.031228	0.015766	0.009747			437.5	-0.00088	-0.00133	-0.00084	0.000501	0.00031
875	0.182915	0.074913	0.032218	0.015289	0.010285			438	-0.00092	-0.00085	0.000503	-1.1e-06	0.000985
876	0.18312	0.075382	0.031983	0.014553	0.01052			438.5	-0.00026	-2.3e-05	0.00033	-0.00083	0.001296
877	0.182326	0.074203	0.032153	0.014436	0.009722			439	-0.00077	-0.00123	0.000665	-0.00091	0.000378
878	0.181557	0.074227	0.031017	0.015314	0.008799			439.5	-0.00125	-0.00096	-0.00062	0.000206	-0.00069
879	0.181805	0.074356	0.031707	0.01549	0.009143			440	-0.00054	-0.00055	0.00035	0.000478	-0.00024
880	0.180832	0.074711	0.031812	0.015791	0.009428			440.5	-0.00127	0.000129	0.000598	0.000898	0.000132
881	0.180507	0.074162	0.032031	0.015373	0.009579			441	-0.00123	-0.0003	0.000993	0.000459	0.000343
882	0.180738	0.075317	0.032486	0.015323	0.010469			441.5	-0.00055	0.001376	0.001664	0.000458	0.001435
883	0.179969	0.073928	0.030197	0.015666	0.009882			442	-0.00104	-0.0001	-0.00103	0.000925	0.000767
884	0.180524	0.072999	0.0307	0.014854	0.009496			442.5	3.61e-05	-0.00101	-0.00029	8.13e-06	0.000344
885	0.180567	0.073234	0.031958	0.01513	0.010209			443	0.000492	-0.00048	0.001372	0.000403	0.001218
886	0.178928	0.073387	0.031666	0.014804	0.00832			443.5	-0.00102	-4.46e-05	0.001129	6.27e-05	-0.001
887	0.179431	0.072854	0.031358	0.014411	0.009			444	-8.91e-06	-0.00046	0.000858	-0.00035	-0.00015
888	0.178176	0.073298	0.03182	0.014319	0.008967			444.5	-0.00107	0.000322	0.001546	-0.0004	-0.00017
889	0.177826	0.071941	0.030441	0.014511	0.008505			445	-0.00107	-0.00111	-4.07e-05	-0.00011	-0.00068
890	0.17751	0.072991	0.030384	0.01508	0.008992			445.5	-0.00103	0.000422	2.6e-06	0.000632	-6.48e-05
891	0.177707	0.071853	0.031098	0.014018	0.008723			446	-0.00039	-0.00075	0.001004	-0.00058	-0.00035
892	0.176673	0.072305	0.029848	0.014779	0.009546			446.5	-0.0012	5.19e-05	-0.00042	0.000386	0.000656
893	0.176059	0.071756	0.031139	0.01467	0.009009			447	-0.00151	-0.0004	0.001275	0.000306	4.4e-05
894	0.176648	0.071554	0.030498	0.014294	0.009579			447.5	-0.00041	-0.00041	0.000606	-8.77e-05	0.00076
895	0.175418	0.071739	0.031269	0.014737	0.009756			448	-0.00145	5.82e-05	0.001668	0.000503	0.001
896	0.176392	0.070617	0.030644	0.014219	0.009613			448.5	0.0001	-0.0011	0.00101	-5.9e-05	0.000857
897	0.175077	0.070027	0.029524	0.014277	0.010024			449	-0.00105	-0.00159	-0.00026	6.59e-05	0.001379
898	0.174667	0.070197	0.030067	0.014285	0.00937			449.5	-0.00112	-0.00115	0.000526	0.000126	0.000628
899	0.173489	0.070778	0.030181	0.014469	0.009134			450	-0.0021	-0.0002	0.000769	0.000401	0.000382
900	0.174103	0.07094	0.030782	0.014796	0.009437			450.5	-0.00097	0.000237	0.001619	0.000852	0.000773
901	0.173395	0.070035	0.029873	0.014679	0.009176			451	-0.0014	-0.00064	0.000618	0.000759	0.000491
902	0.174223	0.069446	0.030067	0.014461	0.009663			451.5	-3.35e-05	-0.00115	0.000962	0.000558	0.0011
903	0.173036	0.069979	0.029783	0.014076	0.010243			452	-0.00102	-0.00026	0.000722	0.000155	0.001819
904	0.172874	0.069979	0.030335	0.015122	0.009294			452.5	-0.00081	-2.57e-05	0.001515	0.001456	0.000724
905	0.172729	0.069632	0.029191	0.014386	0.009621			453	-0.00058	-0.00023	0.000213	0.000636	0.001145
906	0.173019	0.069414	0.028639	0.013876	0.010301			453.5	0.000159	-0.00027	-0.00036	7.43e-05	0.001978
907	0.172618	0.06943	0.028915	0.014118	0.009487			454	7.94e-05	-1.79e-05	8.93e-05	0.000424	0.001037
908	0.171773	0.06901	0.028801	0.012981	0.010335			454.5	-0.00051	-0.00031	5.43e-05	-0.00088	0.002078
909	0.171192	0.07048	0.029694	0.01421	0.009764			455	-0.00079	0.001737	0.001271	0.00064	0.001428
910	0.170611	0.067976	0.02881	0.014369	0.008337			455.5	-0.00107	-0.00114	0.000279	0.000874	-0.00024
911	0.170765	0.068121	0.029118	0.01314	0.009731			456	-0.0005	-0.00073	0.000772	-0.00054	0.001453
912	0.170748	0.067726	0.028493	0.013809	0.00921			456.5	-0.00012	-0.001	0.000104	0.000314	0.000855
913	0.170099	0.068905	0.028704	0.013876	0.00989			457	-0.00049	0.000685	0.000474	0.000446	0.001692
914	0.170321	0.068436	0.028631	0.012822	0.008648			457.5	0.000158	0.000337	0.000485	-0.00076	0.000243
915	0.168852	0.066991	0.028388	0.0138	0.009714			458	-0.00117	-0.00123	0.000292	0.000459	0.001549
916	0.169954	0.066797	0.028079	0.014043	0.009663			458.5	0.000508	-0.00125	2.09e-05	0.000802	0.001511
917	0.168391	0.066312	0.029288	0.012964	0.009563			459	-0.00093	-0.00163	0.001618	-0.00043	0.00142
918	0.169254	0.067588	0.028063	0.013491	0.008622			459.5	0.000474	0.000179	0.000209	0.000245	0.000333
919	0.168041	0.06733	0.029029	0.012989	0.009781			460	-0.00055	7.11e-05	0.001507	-0.0003	0.001737
920	0.168511	0.067177	0.027519	0.01375	0.009126			460.5	0.000382	0.000111	-0.00025	0.000662	0.000983
921	0.167606	0.066595	0.029126	0.012947	0.008706			461	-0.00029	-0.00039	0.001826	-0.00026	0.000513
922	0.166906	0.067968	0.028477	0.012738	0.00921			461.5	-0.00072	0.001523	0.001135	-0.00045	0.001139
923	0.167188	0.06645	0.027811	0.013541	0.010075			462	-2.58e-06	-0.00014	0.000411	0.000559	0.002197
924	0.166564	0.066482	0.027146	0.012922	0.008194			462.5	-0.00035	0.000127	-0.0003	-0.00013	-1.16e-05
925	0.165318	0.066361	0.027462	0.01273	0.008706			463	-0.00142	0.000192	0.000193	-0.00031	0.000626
926	0.165557	0.065981	0.027657	0.013056	0.00858			463.5	-0.00076	-5.79e-05	0.000533	0.000134	0.000501
927	0.165471	0.065198	0.027819	0.013558	0.008513			464	-0.00048	-0.00082	0.000832	0.000778	0.000448
928	0.164182	0.065787	0.027787	0.012914	0.009378			464.5	-0.0016	0.000134	0.000893	6.44e-05	0.001512
929	0.165369	0.065804	0.027008	0.013198	0.008857			465	0.000169	0.000371	3.74e-05	0.00045	0.000912
930	0.164182	0.064277	0.026878	0.014135	0.009202			465.5	-0.00084	-0.0013	-2.45e-05	0.001615	0.001349
931	0.164592	0.064746	0.02773	0.012897	0.009185			466	2.98e-05	-0.00052	0.001129	0.00019	0.001359
932	0.164267	0.066086	0.028014	0.012671	0.009529			466.5	2.71e-05	0.00136	0.001572	-3.26e-05	0.001794
933	0.164541	0.064503	0.027446	0.012989	0.008177			467	0.000732	-0.00038	0.000975	0.000395	0.000216
934	0.163021	0.064536	0.027032	0.013365	0.009151			467.5	-0.00067	-0.00013	0.000564	0.000889	0.001402
935	0.163217	0.063195	0.026878	0.013692	0.009403			468	-6.6e-05	-0.00158	0.000474	0.001329	0.001728
936	0.162141	0.064398	0.027349	0.012646	0.008135			468.5	-0.00095	0.000123	0.001145	0.00013	0.000239
937	0.163303	0.06393	0.026789	0.01324	0.009025			469	0.000788	-0.00025	0.000561	0.000888	0.001326
938	0.162269	0.064576	0.027235	0.012813	0.00879			469.5	-4.07e-05	0.000759	0.001207	0.000423	0.001073
939	0.162082	0.064681	0.026375	0.011383	0.009353			470	0.000121	0.0011	0.000246	-0.00124	0.001767
940	0.161475	0.06376	0.026756	0.012471	0.008773			470.5	-0.00022	0.000172	0.000807	0.000113	0.001109
941	0.161416	0.063639	0.026107	0.01324	0.010058			471	8.61e-05	0.000229	0.000108	0.001078	0.00266
942	0.161279	0.064269	0.02648	0.012153	0.008278			471.5	0.000308	0.001214	0.000662	-0.00018	0.000571
943	0.160425	0.063244	0.025823	0.011868	0.00832			472	-0.00032	0.000156	-5.52e-05	-0.00047	0.000642
944	0.161305	0.062605	0.026359	0.01242	0.007531			472.5	0.001082	-0.00043	0.000706	0.000234	-0.00027
945	0.159503	0.062234	0.026278	0.012738	0.008975			473	-0.00065	-0.00068	0.000698	0.000666	0.001471
946	0.159665	0.062299	0.0267	0.012479	0.009437			473.5	-9.66e-05	-0.0004	0.001313	0.000398	0.002054
947	0.158376	0.063066	0.02631	0.012546	0.008664			474	-0.00123	0.000764	0.000931	0.000525	0.001152
948	0.157838	0.062129	0.026107	0.012412	0.00848			474.5	-0.00149	-0.0002	0.000778	0.000409	0.000963
949	0.158274	0.062194	0.026294	0.01268	0.008883			475	-0.00061	8.62e-05	0.001098	0.000781	0.001467
950	0.157881	0.062323	0.026911	0.012136	0.007892			475.5	-0.0007	0.000457	0.00195	0.000171	0.000309
951	0.158274	0.06221	0.025677	0.012128	0.009428			476	0.000132	0.00052	0.000525	0.000207	0.002168
952	0.157326	0.061798	0.02532	0.012387	0.008589			476.5	-0.00061	0.000212	0.000182	0.000567	0.001191
953	0.157198	0.061346	0.025125	0.011776	0.007724			477	-0.00039	-0.00014	2.65e-05	-0.00012	0.000184
954	0.156532	0.061927	0.025669	0.012621	0.008874			477.5	-0.0008	0.000771	0.000796	0.000936	0.001582
955	0.15701	0.060861	0.025636	0.012337	0.008228			478	0.00012	-0.00035	0.00085	0.00064	0.000838
956	0.156404	0.061386	0.025247	0.011818	0.007581			478.5	-0.00023	0.000508	0.000461	6.24e-05	9.04e-05
957	0.156984	0.060845	0.025685	0.012362	0.007648			479	0.000825	3.81e-05	0.001089	0.00076	0.000198
958	0.156054	0.061265	0.025645	0.01089	0.008606			479.5	0.0001	0.00076	0.00113	-0.00096	0.001362
959	0.155575	0.060118	0.025636	0.011676	0.008765			480	-0.0001	-0.00047	0.001206	3.07e-05	0.001572
960	0.155686	0.060094	0.025645	0.011383	0.008891			480.5	0.000392	-0.0003	0.001311	-0.00028	0.001749
961	0.153979	0.059666	0.024833	0.012437	0.007472			481	-0.00125	-0.00063	0.000405	0.001027	8.25e-05
962	0.154252	0.060934	0.024484	0.012688	0.00869			481.5	-0.00056	0.001134	6.38e-05	0.001366	0.001558
963	0.154747	0.059763	0.024508	0.012897	0.008513			482	0.000378	-0.00012	0.000177	0.001658	0.001365
964	0.153979	0.059214	0.024573	0.011082	0.007573			482.5	-0.00016	-0.0006	0.000355	-0.00046	0.000275
965	0.153467	0.059076	0.024468	0.012521	0.008438			483	-0.0004	-0.00057	0.000311	0.001303	0.001322
966	0.152638	0.058737	0.024865	0.012153	0.00848			483.5	-0.001	-0.00079	0.000891	0.000902	0.001403
967	0.152818	0.060328	0.025758	0.011567	0.007833			484	-0.00044	0.001367	0.002074	0.00024	0.000649
968	0.153654	0.059383	0.025612	0.012596	0.009689			484.5	0.000905	0.000389	0.001988	0.00152	0.002889
969	0.152169	0.059432	0.025287	0.011994	0.008908			485	-0.00048	0.000649	0.001675	0.000835	0.001976
970	0.152425	0.058931	0.025523	0.011793	0.009059			485.5	0.000178	0.000216	0.002049	0.000639	0.002178
971	0.151733	0.058422	0.025969	0.011266	0.007413			486	-0.00028	-0.00022	0.00269	4.92e-05	0.000241
972	0.151742	0.058374	0.023648	0.01089	0.007926			486.5	8.84e-05	-8.8e-05	-8.65e-05	-0.00036	0.000879
973	0.152348	0.057929	0.024492	0.010789	0.008186			487	0.00116	-0.00045	0.001045	-0.00043	0.001212
974	0.150342	0.057752	0.025044	0.011308	0.008765			487.5	-0.00084	-0.00047	0.001806	0.000227	0.001926
975	0.150512	0.058987	0.024095	0.01135	0.008429			488	-0.00029	0.001254	0.000726	0.000321	0.001546
976	0.150102	0.058398	0.024906	0.010555	0.008035			488.5	-0.00041	0.000705	0.001814	-0.00059	0.001101
977	0.149351	0.057921	0.024038	0.011383	0.008648			489	-0.00094	0.000309	0.000826	0.000445	0.001849
978	0.150256	0.056823	0.025182	0.013089	0.008454			489.5	0.000481	-0.00086	0.002319	0.002524	0.001642
979	0.148899	0.056718	0.024484	0.010915	0.00837			490	-0.00076	-0.00081	0.001548	-3.84e-05	0.001564
980	0.149454	0.057316	0.022918	0.011274	0.009051			490.5	0.000246	0.000131	-0.0003	0.000434	0.002397
981	0.149052	0.057623	0.025231	0.012362	0.007758			491	0.00012	0.000691	0.002635	0.001781	0.000884
982	0.147959	0.05776	0.023981	0.011274	0.007464			491.5	-0.00081	0.001048	0.001179	0.00052	0.000551
983	0.148591	0.05734	0.024265	0.011776	0.007783			492	0.000287	0.00072	0.001611	0.001156	0.000952
984	0.148531	0.056573	0.023762	0.011626	0.007481			492.5	0.000565	-4.72e-05	0.001077	0.00102	0.000614
985	0.148309	0.057905	0.023721	0.010865	0.007783			493	0.000649	0.001791	0.001118	0.000147	0.001003
986	0.146636	0.057041	0.024322	0.011693	0.008211			493.5	-0.00096	0.000911	0.001933	0.001181	0.001535
987	0.146943	0.056726	0.023445	0.010664	0.007615			494	-0.00026	0.0007	0.000941	-1.16e-05	0.000846
988	0.146371	0.056662	0.023867	0.010681	0.007623			494.5	-0.00058	0.000806	0.001543	4.71e-05	0.000878
989	0.145791	0.056476	0.022739	0.01155	0.008177			495	-0.00091	0.000756	0.000233	0.001124	0.001557
990	0.145543	0.055797	0.023445	0.011366	0.008194			495.5	-0.00085	0.0001	0.001188	0.000948	0.001595
991	0.145944	0.056048	0.023023	0.011818	0.009311			496	-3.41e-05	0.000598	0.000752	0.001527	0.002952
992	0.145313	0.05524	0.023405	0.011835	0.007623			496.5	-0.00044	-0.00022	0.001296	0.001589	0.000956
993	0.144561	0.055515	0.023104	0.011952	0.00717			497	-0.00097	0.000298	0.00101	0.001767	0.000439
994	0.144612	0.05566	0.022999	0.0114	0.007766			497.5	-0.00057	0.000661	0.000963	0.001138	0.001173
995	0.144629	0.056048	0.023023	0.011082	0.00832			498	-0.0002	0.001326	0.001072	0.000802	0.001854
996	0.143963	0.054651	0.023535	0.010965	0.007934			498.5	-0.00065	-0.00023	0.001782	0.0007	0.001415
997	0.144527	0.055773	0.023267	0.011249	0.007615			499	0.000359	0.001348	0.001533	0.001079	0.001052
998	0.144288	0.055369	0.022966	0.011124	0.007556			499.5	0.000422	0.001022	0.001239	0.000963	0.001011
999	0.144425	0.054142	0.022074	0.011919	0.007581			500	0.000922	-0.00031	0.000224	0.001954	0.00106
[truncated: 1,000 more rows]
