# Supplementary material for: Dilated cardiomyopathy mutation E525K in human beta-cardiac myosin stabilizes the interacting-heads motif and super-relaxed state of myosin
Source: eLife journal article supplement (doi:10.7554/elife.77415), 2022-11-08
Supplement: fig3-figsupp3-data1 [file elife-77415-fig3-figsupp3-data1-v1.zip]

## Sheet: Traces S1
WT	S1							E525K	S1
Time	20 KCl	50 KCl	75 KCl	100 KCl	150 KCl			Time	20 KCl	50 KCl	75 KCl	100 KCl	150 KCl
0.001	1	1	0.963546	0.941802	0.966298			0.001	0.970229	0.961291	0.956807	0.940872	0.953247
0.002	1.0643	1.00679	0.988617	0.995564	1			0.002	0.952835	0.975686	0.98122	1	1
0.003	1.04104	1.01647	0.981005	0.975597	0.989915			0.003	0.964989	1	0.983936	0.978844	0.999808
0.004	1.03403	1.00474	1	0.976991	1.01055			0.004	0.989465	0.981289	1	0.988808	0.995929
0.005	1.07044	1.00141	0.983207	1	0.993826			0.005	1	0.998099	0.975926	0.974364	0.980446
0.006	1.02009	0.993781	0.978077	0.971478	0.988527			0.006	0.960857	0.963508	0.933227	0.94899	0.995292
0.007	1.02179	1.01544	0.955197	0.966425	0.943054			0.007	0.927754	0.961059	0.951061	0.950611	0.994203
0.008	1.02976	1.00774	0.962748	0.965455	0.987987			0.008	0.936279	0.975586	0.948319	0.953198	0.993532
0.009	1.0433	1.00869	0.977208	0.982626	0.99215			0.009	0.978614	0.97063	0.960287	0.979519	0.999425
0.01	1.04975	0.999561	0.98069	0.979222	0.990827			0.01	0.930062	0.974648	0.966466	0.964643	0.997446
0.011	1.01342	0.991482	0.966571	0.972422	0.977696			0.011	0.953189	0.977661	0.96657	0.945587	0.964929
0.012	1.04866	0.992837	0.97157	0.951	0.998137			0.012	0.97035	0.95773	0.959393	0.979697	0.983925
0.013	1.03352	1.00479	0.988117	0.973454	0.987475			0.013	0.939239	0.962063	0.930042	0.952214	0.977578
0.014	1.03725	0.9874	0.980707	0.965349	0.999749			0.014	0.957479	0.963699	0.950992	0.950508	0.987246
0.015	1.04796	0.989307	0.9462	0.969133	0.998305			0.015	0.940383	0.977429	0.961571	0.97143	0.975207
0.016	1.02363	0.99505	0.964423	0.988694	0.997514			0.016	0.930602	0.970697	0.958725	0.938191	0.97954
0.017	1.03605	0.987161	0.953969	0.978596	0.963933			0.017	0.942784	0.964213	0.957926	0.955185	0.98423
0.018	1.02273	0.990605	0.966606	0.966619	0.959807			0.018	0.94525	0.990553	0.93918	0.963434	0.975861
0.019	1.03633	0.99918	0.980716	0.974733	0.990296			0.019	0.961276	0.964321	0.955817	0.947855	0.981475
0.02	1.03356	0.994534	0.971201	0.974098	0.970107			0.02	0.942849	0.969236	0.947772	0.956901	0.977962
0.021	1.02503	1.00297	0.99715	0.966116	0.994897			0.021	0.927503	0.948026	0.944969	0.964165	1.00648
0.022	1.04297	0.990624	0.960792	0.980606	0.988713			0.022	0.947754	0.96858	0.946644	0.961147	0.97573
0.023	1.01333	0.985273	0.972438	0.975041	0.986404			0.023	0.936223	0.967899	0.96092	0.965131	0.989077
0.024	1.04868	1.00326	0.983443	0.982291	0.975964			0.024	0.958484	0.969767	0.957197	0.940469	0.975355
0.025	1.02218	0.999628	0.970421	0.971593	0.987			0.025	0.949615	0.9568	0.934138	0.94465	0.978267
0.026	1.05016	0.99132	0.966624	0.971055	0.996722			0.026	0.949718	0.972573	0.974164	0.94764	0.957188
0.027	1.04426	1.01994	0.967939	0.972396	1.01756			0.027	0.961462	0.978699	0.961441	0.959263	0.957798
0.028	1.04235	1.01062	0.975507	0.98648	0.967844			0.028	0.947298	0.956294	0.94135	0.9629	0.979984
0.029	1.04181	0.970411	0.970842	0.971364	0.990613			0.029	0.941081	0.969709	0.947529	0.956441	1.00005
0.03	1.01299	0.991081	0.965352	0.961372	0.989756			0.03	0.958922	0.963325	0.953491	0.965028	0.996992
0.031	1.05031	1.02321	0.982365	0.968515	0.975303			0.031	0.923492	0.958917	0.954576	0.925181	0.991901
0.032	1.02625	0.997291	0.980988	0.97946	0.977939			0.032	0.930593	0.942306	0.949803	0.961541	0.974222
0.033	1.05804	0.999046	0.962949	0.968498	0.965572			0.033	0.962207	0.956394	0.938651	0.951164	0.980568
0.034	1.03188	0.989985	0.976393	0.985863	0.993891			0.034	0.927354	0.970016	0.954715	0.9813	0.958879
0.035	1.02153	1.00756	0.968264	0.964943	0.970945			0.035	0.966041	0.98241	0.952823	0.961887	0.96771
0.036	1.04796	0.994563	0.979944	0.970455	0.978171			0.036	0.92365	0.951031	0.950185	0.960753	0.956944
0.037	1.02544	0.987285	0.966212	0.957676	0.971736			0.037	0.928639	0.964022	0.928957	0.967858	0.984674
0.038	1.0524	1.02788	0.987863	0.977625	1.02062			0.038	0.919546	0.958593	0.952346	0.947715	0.980961
0.039	1.04127	0.987276	0.984987	0.971787	0.981477			0.039	0.945595	0.967492	0.941532	0.975985	0.992843
0.04	1.0378	0.973044	0.986346	0.975332	0.986776			0.04	0.918923	0.972523	0.925807	0.960275	0.982809
0.041	1.04868	0.990671	0.97527	0.99044	0.965748			0.041	0.926256	0.9806	0.94444	0.965637	0.973987
0.042	1.02191	0.990757	0.966939	0.957041	0.98591			0.042	0.942868	0.951944	0.946453	0.963762	0.963029
0.043	1.0684	0.993762	0.976594	0.960666	0.991581			0.043	0.944683	0.977636	0.952962	0.968196	0.961137
0.044	1.04149	0.985377	0.952382	0.963523	0.960329			0.044	0.942003	0.970655	0.938425	0.944106	0.97913
0.045	1.03583	1.03773	0.968649	0.982652	0.965125			0.045	0.935972	0.974175	0.958508	0.94748	0.964929
0.046	0.995787	0.976011	0.986863	0.972687	0.977203			0.046	0.945213	0.959108	0.956642	0.959619	0.973106
0.047	1.03629	1.03294	0.98233	0.961389	0.994561			0.047	0.936149	0.952293	0.930207	0.945062	0.978476
0.048	1.01488	0.981219	0.974788	0.967554	0.989449			0.048	0.943659	0.95138	0.944717	0.953264	0.99198
0.049	1.01512	1.01257	0.970649	0.947314	0.977622			0.049	0.937647	0.951936	0.938087	0.932445	0.953334
0.05	1.03437	0.993333	0.964168	0.95197	0.977222			0.05	0.944208	0.957464	0.918742	0.93971	0.975695
0.051	1.03393	1.01586	0.960915	0.967651	0.979261			0.051	0.927885	0.961084	0.922483	0.956882	0.990803
0.052	1.03573	1.01757	0.954469	0.972166	0.97169			0.052	0.92459	0.97073	0.955392	0.9638	0.972199
0.053	1.04674	1.01692	0.967694	0.950956	0.96519			0.053	0.938178	0.938529	0.939944	0.958822	0.982565
0.054	1.02954	1.01408	0.975735	0.961539	0.999357			0.054	0.941928	0.932046	0.945307	0.963921	0.950301
0.055	1.03819	0.997053	0.967088	0.953902	0.988825			0.055	0.928778	0.942929	0.920843	0.96095	0.959646
0.056	1.03304	1.01599	0.958758	0.982123	0.992876			0.056	0.946498	0.950193	0.940326	0.946356	0.964336
0.057	1.0281	1.02112	0.966869	0.943521	0.985696			0.057	0.954585	0.957722	0.935648	0.944659	0.963831
0.058	1.02142	1.00497	0.959547	0.958223	0.96735			0.058	0.948824	0.957705	0.936264	0.953517	0.941679
0.059	1.0173	0.999971	0.962169	0.95907	1.00644			0.059	0.924339	0.956062	0.936516	0.955335	0.970953
0.06	1.00123	0.987466	0.974016	0.983896	0.973208			0.06	0.925428	0.952799	0.93104	0.911683	0.957397
0.061	1.01655	0.991272	0.959424	0.981285	1.0036			0.061	0.936335	0.978757	0.936837	0.95586	0.951338
0.062	1.03674	0.989431	0.982514	0.956821	0.968235			0.062	0.917918	0.95734	0.946809	0.930786	0.94983
0.063	1.02276	1.02119	0.974858	0.970235	0.977771			0.063	0.92902	0.958419	0.932507	0.96663	0.965417
0.064	1.03771	0.99877	0.965948	0.964591	0.985715			0.064	0.931952	0.938621	0.946358	0.930439	0.93773
0.065	1.0242	0.990881	0.956258	0.961045	0.991833			0.065	0.906192	0.927298	0.909734	0.945062	0.95391
0.066	1.01161	0.977594	0.978103	0.957623	0.982371			0.066	0.939406	0.945228	0.933453	0.931995	0.967004
0.067	1.00842	1.01461	0.957574	0.95018	0.972202			0.067	0.905056	0.9525	0.946792	0.928808	0.970404
0.068	1.0251	1.00552	0.979541	0.9628	1.0043			0.068	0.93506	0.952841	0.937861	0.945175	0.961241
0.069	1.00362	0.984662	0.96045	0.974892	0.978805			0.069	0.931254	0.945544	0.949794	0.933673	0.977561
0.07	1.01554	0.996833	0.979225	0.973674	0.993956			0.07	0.91306	0.944033	0.942018	0.935435	0.964048
0.071	1.00291	1.01727	0.942867	0.983138	0.974474			0.071	0.920309	0.951637	0.92552	0.932642	0.972513
0.072	1.00033	0.996509	0.948322	0.968559	0.99472			0.072	0.929551	0.924766	0.915523	0.921403	0.967937
0.073	0.989553	1.0132	0.966869	0.956821	0.997793			0.073	0.942105	0.930095	0.924765	0.949936	0.959498
0.074	1.04432	0.989784	0.955162	0.959387	0.982288			0.074	0.911524	0.91815	0.91193	0.96005	0.987595
0.075	1.01733	0.99256	0.961967	0.955577	0.98157			0.075	0.941882	0.938081	0.946731	0.974382	0.95459
0.076	1.01935	0.995345	0.957179	0.952984	0.985891			0.076	0.927075	0.955298	0.933939	0.91802	0.952628
0.077	1.00358	0.981696	0.984294	0.958549	0.999683			0.077	0.935097	0.962744	0.906219	0.927421	0.960544
0.078	0.996968	0.98387	0.961125	0.967069	0.989048			0.078	0.938317	0.932976	0.942331	0.948258	0.948723
0.079	1.01139	0.98967	0.949269	0.963506	0.986003			0.079	0.928722	0.93242	0.928054	0.9421	0.958068
0.08	1.04754	0.990929	0.964388	0.956239	0.948176			0.08	0.930425	0.949221	0.940986	0.934358	0.950527
0.081	1.01451	0.996204	0.956934	0.961971	0.991218			0.081	0.914186	0.948233	0.906427	0.908459	0.956124
0.082	1.02484	0.994391	0.939938	0.974953	0.993137			0.082	0.91977	0.946922	0.923142	0.911439	0.963334
0.083	1.01463	1.00554	0.957854	0.966998	0.986087			0.083	0.926433	0.939011	0.934372	0.930608	0.950222
0.084	1.03542	1.02177	0.953934	0.953143	0.968794			0.084	0.938261	0.940812	0.930727	0.945437	0.951931
0.085	1.01727	1.01479	0.974542	0.938785	0.990231			0.085	0.91963	0.932303	0.92539	0.945868	0.950676
0.086	1.0118	0.973111	0.95575	0.96549	0.972332			0.086	0.919444	0.945121	0.919575	0.934048	0.973158
0.087	1.02951	0.995698	0.95817	0.953311	1.01082			0.087	0.932761	0.922525	0.952112	0.913333	0.969889
0.088	1.01848	0.989899	0.959643	0.957835	0.984066			0.088	0.919109	0.944855	0.921624	0.941275	0.96377
0.089	1.01538	0.996852	0.959196	0.951626	0.985193			0.089	0.897797	0.929415	0.937098	0.958279	0.965626
0.09	1.03044	0.996662	0.948497	0.95167	0.990129			0.09	0.937703	0.941941	0.90313	0.937479	0.971258
0.091	1.03968	1.01485	0.949427	0.972651	0.977762			0.091	0.928127	0.942871	0.910706	0.962487	0.984892
0.092	0.994887	1.00955	0.974025	0.94241	0.972854			0.092	0.93653	0.939526	0.916486	0.944734	0.95384
0.093	1.01097	0.990414	0.935308	0.946158	0.957945			0.093	0.914297	0.922076	0.925182	0.958035	0.972487
0.094	1.01125	1.00586	0.928451	0.970411	0.985519			0.094	0.919314	0.913941	0.913101	0.953976	0.942716
0.095	0.995297	1.01861	0.976647	0.977731	0.968766			0.095	0.920849	0.948474	0.920313	0.93477	0.942342
0.096	1.01009	1.00137	0.935291	0.982547	0.984327			0.096	0.932659	0.928609	0.924783	0.929277	0.958957
0.097	1.04426	0.99256	0.985548	0.974257	0.978414			0.097	0.893972	0.918648	0.899207	0.949411	0.951364
0.098	1.02175	0.984939	0.953321	0.975853	0.965357			0.098	0.922515	0.938355	0.91902	0.951389	0.949333
0.099	1.02542	0.994048	0.970605	0.982088	0.983424			0.099	0.911943	0.928875	0.919784	0.940694	0.947563
0.1	1.03064	0.983651	0.957626	0.957553	0.97562			0.1	0.924469	0.925139	0.923082	0.930589	0.938288
0.101	1.00799	0.996852	0.967439	0.954501	0.95502			0.101	0.914502	0.935151	0.932654	0.938622	0.948313
0.102	0.998889	0.999695	0.945121	0.968647	0.989384			0.102	0.932957	0.935516	0.922387	0.931105	0.964075
0.103	1.0228	0.986465	0.964195	0.973198	1.00296			0.103	0.912176	0.945627	0.91922	0.925678	0.946639
0.104	1.03913	0.973512	0.975235	0.981559	0.970489			0.104	0.91172	0.943676	0.898556	0.91652	0.945349
0.105	1.02087	0.979731	0.967457	0.968603	0.989179			0.105	0.894661	0.929083	0.912407	0.928649	0.959053
0.106	1.01585	1.00372	0.945612	0.96975	0.995418			0.106	0.903744	0.938131	0.927803	0.933973	0.964476
0.107	1.02821	1.01173	0.9747	0.943027	0.984886			0.107	0.914474	0.916971	0.934893	0.928902	0.937869
0.108	1.02871	0.981371	0.947305	0.957509	0.985631			0.108	0.911589	0.911542	0.900778	0.955204	0.948104
0.109	1.02016	1.00089	0.968562	0.947931	0.970805			0.109	0.922934	0.938787	0.922778	0.930149	0.963342
0.11	1.00882	1.00061	0.97855	0.978604	0.971112			0.11	0.93076	0.938778	0.911157	0.940553	0.965461
0.111	1.0071	0.985463	0.939886	0.974847	0.983843			0.111	0.918764	0.935931	0.935891	0.938351	0.949926
0.112	1.00191	0.976449	0.92774	0.962333	0.977324			0.112	0.89414	0.95807	0.920869	0.92848	0.952916
0.113	1.03306	1.00215	0.955539	0.958673	1.00509			0.113	0.903735	0.92382	0.916469	0.9418	0.966524
0.114	1.00281	1.01097	0.952058	0.976876	0.97453			0.114	0.935404	0.908736	0.919393	0.922772	0.944721
0.115	1.00268	0.996414	0.950418	0.963453	1.00956			0.115	0.90272	0.900476	0.921146	0.932923	0.938515
0.116	1.03665	0.989508	0.96059	0.968136	0.98781			0.116	0.885261	0.928933	0.935865	0.958597	0.946482
0.117	1.01247	0.979168	0.956741	0.943027	0.979652			0.117	0.907699	0.925181	0.924218	0.927374	0.94174
0.118	1.03331	0.981991	0.954022	0.959819	0.957935			0.118	0.904554	0.927157	0.920218	0.953442	0.976567
0.119	1.02334	0.989107	0.966334	0.956424	0.973897			0.119	0.911906	0.94439	0.906046	0.927356	0.92665
0.12	1.01966	1.00604	0.961125	0.964846	0.974465			0.12	0.907131	0.936047	0.914724	0.936626	0.935132
0.121	1.01453	0.987409	0.952426	0.954995	0.973487			0.121	0.924897	0.931772	0.925616	0.910821	0.94908
0.122	1.00697	0.982802	0.981479	0.946299	1.00816			0.122	0.907066	0.927846	0.912763	0.93343	0.9792
0.123	1.00588	0.982106	0.957477	0.959449	0.954657			0.123	0.923204	0.927356	0.9225	0.940535	0.945986
0.124	0.996047	1.00844	0.955294	0.961707	0.959537			0.124	0.928508	0.917345	0.931248	0.939513	0.948304
0.125	0.98502	0.98574	0.937351	0.963065	0.964845			0.125	0.911422	0.917013	0.920973	0.939391	0.95207
0.126	1.02688	0.999218	0.966931	0.964802	0.998147			0.126	0.912799	0.933391	0.936481	0.935651	0.940738
0.127	0.991815	1.00158	0.968141	0.96415	0.983908			0.127	0.909812	0.931407	0.901541	0.940591	0.962322
0.128	0.982449	1.01218	0.958477	0.960005	0.990306			0.128	0.885801	0.943103	0.90043	0.930233	0.954738
0.129	1.01321	1.00635	0.967088	0.985104	0.976355			0.129	0.914307	0.923612	0.916364	0.92893	0.958269
0.13	1.00374	0.998798	0.970675	0.951988	0.991786			0.13	0.909281	0.922342	0.916469	0.936795	0.967161
0.131	1.00686	0.990795	0.958845	0.96228	1.00793			0.131	0.912315	0.918615	0.919784	0.908534	0.956159
0.132	1.02286	1.00474	0.928836	0.942243	0.990557			0.132	0.927466	0.916274	0.915254	0.923409	0.973847
0.133	0.998209	0.996948	0.941026	0.966451	0.979391			0.133	0.897648	0.925173	0.942209	0.923334	0.928751
0.134	1.00008	0.993829	0.959073	0.969618	0.985836			0.134	0.906117	0.932976	0.920547	0.914729	0.948766
0.135	1.0039	0.970268	0.948182	0.960675	0.978544			0.135	0.921017	0.930743	0.911079	0.908946	0.92767
0.136	1.00967	1.01137	0.933133	0.95272	0.994496			0.136	0.902609	0.935425	0.91508	0.942559	0.948095
0.137	1.02132	0.981696	0.959152	0.965428	0.995455			0.137	0.9097	0.918017	0.940456	0.925865	0.937643
0.138	1.00822	0.995574	0.962178	0.955225	0.9729			0.138	0.894233	0.931515	0.927837	0.922313	0.95996
0.139	1.01103	0.998588	0.94157	0.969962	0.991134			0.139	0.877286	0.931689	0.895388	0.926137	0.949028
0.14	1.01039	1.015	0.949585	0.968859	1.00413			0.14	0.89655	0.921296	0.930068	0.921132	0.955758
0.141	1.00323	1.0047	0.962467	0.966231	0.990203			0.141	0.895871	0.938554	0.916121	0.934283	0.954721
0.142	0.977525	1.01247	0.947726	0.982115	0.969706			0.142	0.897229	0.927273	0.918508	0.93941	0.944756
0.143	0.995197	1.00181	0.946419	0.97296	0.960533			0.143	0.885522	0.931233	0.898886	0.944087	0.939779
0.144	1.01422	0.992722	0.961678	0.975809	0.974214			0.144	0.888323	0.907325	0.906306	0.949927	0.944225
0.145	0.989533	0.993485	0.945542	0.954836	0.978013			0.145	0.906871	0.919644	0.932411	0.932427	0.931401
0.146	1.00408	0.982354	0.959889	0.948028	0.981841			0.146	0.904842	0.915651	0.933322	0.925753	0.951338
0.147	1.01555	1.00752	0.938965	0.967439	0.980388			0.147	0.910277	0.913518	0.906236	0.930149	0.94881
0.148	1.02329	0.986513	0.946384	0.989205	0.984718			0.148	0.884024	0.943759	0.905976	0.947527	0.937477
0.149	1.00727	0.988897	0.924776	0.942481	0.95571			0.149	0.90071	0.936554	0.92276	0.93702	0.946901
0.15	1.00152	0.990519	0.962634	0.952702	0.944581			0.15	0.876392	0.906553	0.90477	0.920869	0.948688
0.151	1.0126	0.985921	0.971245	0.980201	0.979196			0.151	0.882972	0.922549	0.92158	0.94121	0.956856
0.152	1.00071	0.989279	0.934019	0.955013	0.975964			0.152	0.903921	0.934453	0.917102	0.936532	0.938654
0.153	0.998199	0.977432	0.930125	0.965605	0.963569			0.153	0.878403	0.92211	0.911452	0.941294	0.935707
0.154	0.980838	1.00544	0.956767	0.947622	0.985919			0.154	0.892669	0.930701	0.927924	0.927702	0.962662
0.155	1.03435	0.991062	0.961537	0.974936	0.965851			0.155	0.885429	0.951355	0.927542	0.927065	0.958086
0.156	1.01789	1.01166	0.975542	0.976761	1.00324			0.156	0.881846	0.924575	0.933001	0.90469	0.937747
0.157	0.996468	0.984004	0.940289	0.959978	0.981151			0.157	0.894438	0.927057	0.924461	0.928434	0.94895
0.158	0.992985	0.99691	0.95489	0.96288	0.951109			0.158	0.87857	0.924284	0.912815	0.898954	0.974143
0.159	0.993106	0.992178	0.948173	0.976902	0.979298			0.159	0.901213	0.919503	0.923446	0.931733	0.939691
0.16	1.00991	0.981572	0.94805	0.955965	0.979484			0.16	0.876569	0.925853	0.900717	0.906143	0.950989
0.161	1.01687	0.996356	0.952312	0.955154	0.948939			0.161	0.902134	0.921487	0.916416	0.924375	0.965748
0.162	0.988473	0.990814	0.950944	0.959467	0.978358			0.162	0.883568	0.907192	0.926831	0.924862	0.95153
0.163	1.00197	0.973559	0.950804	0.943363	0.964985			0.163	0.901538	0.93867	0.902965	0.918535	0.939125
0.164	1.01104	1.01332	0.9653	0.970791	1.00465			0.164	0.878905	0.915892	0.928549	0.922228	0.964545
0.165	1.00754	1.00723	0.942999	0.934358	0.963411			0.165	0.880404	0.944025	0.929599	0.916079	0.942472
0.166	1.01452	1.00603	0.957916	0.95444	0.951891			0.166	0.895312	0.919818	0.906827	0.948783	0.939962
0.167	1.01231	1.0073	0.933563	0.948478	0.998519			0.167	0.889859	0.90686	0.913639	0.934995	0.962052
0.168	1.00871	0.997873	0.949664	0.960119	0.956455			0.168	0.902106	0.915801	0.893835	0.915742	0.935394
0.169	1.01111	0.991759	0.954276	0.957491	0.981356			0.169	0.89669	0.939027	0.906098	0.945859	0.94704
0.17	1.00717	1.00153	0.972683	0.965234	0.977231			0.17	0.877584	0.933457	0.913665	0.917213	0.953099
0.171	1.02649	0.984777	0.960064	0.95802	0.973608			0.171	0.875899	0.920864	0.890537	0.939513	0.956621
0.172	1.00258	1.0033	0.968597	0.945841	0.982017			0.172	0.887411	0.899065	0.910012	0.908993	0.954694
0.173	1.03488	0.984166	0.959433	0.948028	0.963262			0.173	0.900831	0.912879	0.924262	0.908196	0.960535
0.174	0.996158	0.995479	0.977752	0.957024	0.958485			0.174	0.900896	0.913485	0.893149	0.913127	0.939273
0.175	1.01491	0.98945	0.955881	0.956424	0.965739			0.175	0.878933	0.908495	0.922752	0.917063	0.947529
0.176	1.01273	0.969868	0.923259	0.962968	0.964799			0.176	0.881464	0.914348	0.919437	0.911711	0.937712
0.177	0.993436	0.98201	0.947156	0.978049	0.97656			0.177	0.891013	0.933432	0.910879	0.902731	0.960675
0.178	1.01287	0.975953	0.948182	0.940311	0.978646			0.178	0.889784	0.920217	0.900847	0.918573	0.958138
0.179	1.00832	0.994105	0.958056	0.93681	0.962657			0.179	0.889086	0.926957	0.948336	0.92265	0.972714
0.18	1.01386	0.988487	0.966396	0.964326	0.956008			0.18	0.883624	0.921246	0.905369	0.923653	0.950231
0.181	0.995817	1.02397	0.969684	0.96616	0.994198			0.181	0.884833	0.9008	0.895432	0.909602	0.955601
0.182	0.977255	0.979015	0.943613	0.948866	0.978414			0.182	0.880273	0.915635	0.905247	0.935651	0.967797
0.183	0.993156	0.996776	0.936492	0.94002	1.00184			0.183	0.891478	0.920856	0.907686	0.921563	0.928489
0.184	1.02895	1.00675	0.975481	0.943319	0.966736			0.184	0.857929	0.919876	0.918386	0.92176	0.95683
0.185	1.00084	0.980541	0.961573	0.941863	0.975722			0.185	0.878654	0.922176	0.923837	0.927102	0.938288
0.186	1.01387	0.974122	0.961388	0.965199	0.977194			0.186	0.849813	0.909998	0.907391	0.906171	0.961154
0.187	0.989393	0.970249	0.976998	0.975712	0.981319			0.187	0.856309	0.925505	0.905438	0.910765	0.935638
0.188	1.00187	1.00248	0.961511	0.953187	0.980332			0.188	0.879147	0.916921	0.91127	0.914476	0.94269
0.189	1.00427	0.96032	0.964484	0.966372	0.958224			0.189	0.877826	0.914788	0.915687	0.929277	0.956508
0.19	1.00548	0.969925	0.949173	0.960093	0.971345			0.19	0.877546	0.924484	0.930424	0.900379	0.923991
0.191	0.997468	0.975476	0.953549	0.948319	0.963094			0.191	0.857426	0.915327	0.907391	0.916576	0.951295
0.192	0.994787	0.98678	0.947656	0.954263	0.98903			0.192	0.888658	0.898617	0.895796	0.894755	0.938689
0.193	1.01385	0.99194	0.963028	0.964335	0.980062			0.193	0.881427	0.926285	0.897523	0.921347	0.95459
0.194	1.00153	0.984624	0.945717	0.957491	0.962796			0.194	0.869766	0.908495	0.909977	0.913352	0.947494
0.195	1.01514	0.974484	0.96658	0.950444	0.979978			0.195	0.882581	0.93154	0.928749	0.920072	0.962959
0.196	1.00224	0.982936	0.946507	0.96056	0.98103			0.196	0.876746	0.918075	0.909508	0.921853	0.935934
0.197	0.996528	0.981438	0.951172	0.969803	0.984103			0.197	0.869245	0.907142	0.901455	0.920025	0.93086
0.198	0.992325	1.00725	0.958424	0.950991	0.987717			0.198	0.887448	0.915875	0.917041	0.930824	0.950301
0.199	0.980657	1.00284	0.964072	0.937445	0.976914			0.199	0.871702	0.932785	0.918855	0.928968	0.946282
0.2	1.00726	0.970144	0.970658	0.978375	0.964575			0.2	0.876244	0.917195	0.889374	0.914505	0.93243
0.201	1.01229	1.01354	0.962502	0.979539	0.973385			0.201	0.871348	0.906254	0.914438	0.926821	0.936579
0.202	1.00075	0.953919	0.955294	0.937039	0.973068			0.202	0.851275	0.918017	0.89531	0.903106	0.935925
0.203	0.955381	0.967178	0.954645	0.948584	0.96627			0.203	0.885299	0.895487	0.905976	0.918188	0.937364
0.204	1.00559	0.974484	0.941236	0.947993	0.955672			0.204	0.87388	0.91888	0.916998	0.914195	0.935341
0.205	1.01573	1.0077	0.973043	0.949404	0.979475			0.205	0.865467	0.914315	0.906245	0.921619	0.960213
0.206	0.986061	0.987476	0.953785	0.939482	0.983414			0.206	0.879175	0.916199	0.901602	0.931171	0.942934
0.207	0.995947	0.984986	0.969483	0.952535	0.975117			0.207	0.872437	0.909151	0.894347	0.926409	0.973045
0.208	0.98436	1.00215	0.933721	0.94786	0.965227			0.208	0.87575	0.917237	0.912954	0.946028	0.924218
0.209	1.02845	0.990223	0.93508	0.971999	0.975033			0.209	0.874457	0.896276	0.895058	0.916839	0.935838
0.21	1.03561	0.990395	0.944718	0.956424	0.976337			0.21	0.871711	0.911335	0.89597	0.895926	0.947354
0.211	1.01128	0.962723	0.96024	0.955833	0.965944			0.211	0.865597	0.908645	0.909916	0.912724	0.948697
0.212	1.00864	0.975877	0.965843	0.94166	0.965655			0.212	0.858273	0.912488	0.900456	0.908927	0.939142
0.213	0.987842	0.985292	0.958898	0.964661	0.984476			0.213	0.871981	0.887991	0.916043	0.926521	0.966594
0.214	1.01846	0.985969	0.956828	0.95436	0.980416			0.214	0.866779	0.89797	0.908883	0.911767	0.948139
0.215	1.00545	1.00058	0.949418	0.942622	0.984457			0.215	0.848827	0.93115	0.922153	0.911008	0.925063
0.216	0.982178	0.974523	0.947199	0.934993	0.975331			0.216	0.862144	0.92416	0.923038	0.889599	0.928803
0.217	1.01047	0.971289	0.95532	0.949501	0.954173			0.217	0.873936	0.903191	0.915462	0.913108	0.939421
0.218	1.00908	0.981314	0.931546	0.957015	0.983349			0.218	0.882814	0.918067	0.90799	0.923812	0.93107
0.219	0.994436	0.974017	0.926539	0.956697	0.985975			0.219	0.871339	0.89909	0.902288	0.918216	0.962296
0.22	0.998879	0.968685	0.964168	0.975086	0.960813			0.22	0.861521	0.942132	0.893722	0.920963	0.968442
0.221	1.00364	0.98492	0.938939	0.971478	1.009			0.221	0.88475	0.893454	0.913743	0.918226	0.904132
0.222	1.01864	0.976974	0.955373	0.961319	1.00019			0.222	0.878961	0.920059	0.90004	0.916979	0.942437
0.223	0.997008	0.973149	0.945753	0.961927	0.971857			0.223	0.875825	0.909907	0.886762	0.933064	0.922936
0.224	1.01213	0.972739	0.940719	0.964617	0.968784			0.224	0.872009	0.921039	0.889287	0.916604	0.951914
0.225	0.998849	0.963925	0.948226	0.963462	0.986497			0.225	0.884684	0.902793	0.902878	0.912658	0.930634
0.226	0.974974	0.984738	0.936483	0.961786	0.970079			0.226	0.867049	0.907441	0.912589	0.91337	0.93732
0.227	1.02304	0.982468	0.96401	0.948284	0.980406			0.227	0.855909	0.920582	0.901472	0.896367	0.93725
0.228	1.02577	0.982773	0.924232	0.956248	0.979354			0.228	0.851535	0.906835	0.894616	0.92206	0.948078
0.229	0.993626	0.980417	0.940903	0.949624	0.977994			0.229	0.849506	0.923371	0.897315	0.92265	0.926258
0.23	1.01323	0.98925	0.950918	0.972951	0.989244			0.23	0.859669	0.909691	0.890372	0.908477	0.927443
0.231	0.981308	0.982592	0.953698	0.970411	0.980919			0.231	0.858245	0.900078	0.877059	0.91727	0.951312
0.232	1.01144	0.947366	0.953838	0.951185	0.980071			0.232	0.865374	0.893977	0.888306	0.899769	0.943649
0.233	1.0075	0.975438	0.935826	0.961257	0.968859			0.233	0.856989	0.916913	0.888515	0.894595	0.928637
0.234	0.997138	0.965642	0.961239	0.958858	0.975424			0.234	0.84154	0.907699	0.910116	0.91292	0.931157
0.235	1.00201	0.988439	0.953312	0.947375	0.989281			0.235	0.856533	0.917328	0.890424	0.926306	0.944782
0.236	0.995727	0.976344	0.951707	0.960428	0.973077			0.236	0.868994	0.884621	0.903477	0.91203	0.948025
0.237	1.03052	0.975009	0.96458	0.957359	0.963374			0.237	0.877975	0.913758	0.914012	0.890583	0.95173
0.238	1.01907	0.987524	0.961687	0.949386	0.97778			0.238	0.842601	0.90505	0.906861	0.904184	0.922518
0.239	1.00158	0.986885	0.947375	0.931227	0.978535			0.239	0.85938	0.915228	0.905256	0.931283	0.928463
0.24	1.01018	0.968809	0.971175	0.967968	0.983414			0.24	0.867691	0.897471	0.889235	0.940741	0.947354
0.241	0.987092	0.984681	0.947112	0.969388	0.974204			0.241	0.866788	0.908778	0.900821	0.912283	0.936414
0.242	1.00711	0.988878	0.928617	0.936104	0.973115			0.242	0.84463	0.891694	0.91285	0.9017	0.943998
0.243	0.995987	0.992484	0.953461	0.950806	0.948809			0.243	0.837427	0.913758	0.895432	0.909462	0.938244
0.244	1.00196	0.961798	0.967711	0.94981	0.961129			0.244	0.861316	0.888797	0.869708	0.911814	0.942411
0.245	1.01481	0.978214	0.964931	0.957932	0.979289			0.245	0.86864	0.900277	0.89124	0.924394	0.953953
0.246	0.989473	0.98016	0.93672	0.955048	0.985482			0.246	0.867551	0.887684	0.895623	0.905918	0.94738
0.247	0.99966	0.988821	0.938167	0.935055	0.984951			0.247	0.860572	0.87715	0.896864	0.901063	0.940589
0.248	0.995697	0.989641	0.936439	0.963947	0.992597			0.248	0.843922	0.929755	0.890077	0.903809	0.947241
0.249	1.00673	0.967884	0.938255	0.935566	1.00838			0.249	0.846686	0.922516	0.880105	0.904362	0.928297
0.25	1.0091	0.967092	0.952286	0.962262	0.982166			0.25	0.851386	0.904984	0.896239	0.916164	0.935594
0.251	1.00465	0.987524	0.935685	0.942137	0.965357			0.251	0.855416	0.902112	0.87515	0.905384	0.951129
0.252	0.992375	1.00134	0.952514	0.943027	0.964482			0.252	0.86408	0.897853	0.886935	0.904737	0.934687
0.253	1.00625	0.972367	0.956337	0.95481	0.953018			0.253	0.854616	0.904486	0.906132	0.910549	0.933668
0.254	1.00989	0.968027	0.958003	0.943239	0.971802			0.254	0.850809	0.915809	0.888506	0.902478	0.948889
0.255	0.987342	0.968876	0.975867	0.965622	0.966428			0.255	0.855993	0.893354	0.893349	0.917654	0.937747
0.256	1.01325	0.980122	0.95596	0.945329	0.987447			0.256	0.874252	0.897231	0.897558	0.911318	0.925717
0.257	0.980457	0.969639	0.923978	0.965411	0.984597			0.257	0.848752	0.901298	0.902756	0.915507	0.931296
0.258	1.00846	0.970421	0.961239	0.959731	0.974186			0.258	0.851433	0.910961	0.896638	0.925593	0.929588
0.259	0.994807	0.981142	0.934484	0.931395	0.988965			0.259	0.852438	0.907906	0.895301	0.938266	0.928106
0.26	1.00938	0.972004	0.933589	0.938724	0.987381			0.26	0.860609	0.905158	0.875245	0.937516	0.92801
0.261	0.983039	0.974856	0.961064	0.960481	0.971355			0.261	0.867133	0.895911	0.921068	0.914692	0.952498
0.262	0.986811	0.992102	0.920216	0.9445	0.972789			0.262	0.844667	0.901315	0.89689	0.898148	0.949891
0.263	1.00704	1.0156	0.963589	0.95825	0.971066			0.263	0.854597	0.918142	0.890086	0.899244	0.928463
0.264	0.994336	0.996423	0.932406	0.958408	0.99052			0.264	0.849804	0.905814	0.903182	0.910493	0.923895
0.265	1.00474	1.00663	0.925942	0.949421	0.971979			0.265	0.867337	0.905773	0.886553	0.915189	0.938262
0.266	0.997849	0.988678	0.957179	0.956442	0.960682			0.266	0.82651	0.871323	0.887196	0.899676	0.937451
0.267	1.01633	0.983451	0.943359	0.97124	0.967425			0.267	0.878263	0.891578	0.898998	0.912949	0.956917
0.268	1.01196	0.97995	0.936439	0.972087	0.974688			0.268	0.840991	0.911891	0.905577	0.916295	0.930738
0.269	1.00605	0.97581	0.946691	0.948531	0.951966			0.269	0.833053	0.914589	0.898643	0.902253	0.948671
0.27	0.997108	0.986245	0.943665	0.93576	0.956091			0.27	0.876513	0.918772	0.905742	0.912761	0.934897
0.271	1.01723	0.966873	0.934694	0.947949	0.96546			0.271	0.836887	0.916282	0.894946	0.907934	0.934513
0.272	1.00651	0.999618	0.948804	0.958444	0.987214			0.272	0.873787	0.879914	0.886519	0.917916	0.938541
0.273	0.995727	0.992369	0.9566	0.957932	0.970954			0.273	0.875313	0.897986	0.899962	0.898963	0.9361
0.274	0.973823	0.993781	0.945691	0.968736	0.959444			0.274	0.839148	0.905009	0.882448	0.886318	0.936623
0.275	0.997188	1.00445	0.933467	0.935699	0.974968			0.275	0.860506	0.916822	0.895076	0.904765	0.935062
0.276	1.02088	0.97127	0.957933	0.938089	0.982753			0.276	0.846984	0.896035	0.902262	0.9216	0.92767
0.277	1.00128	0.9876	0.958065	0.954704	0.955588			0.277	0.851675	0.899954	0.899962	0.904344	0.931026
0.278	0.998299	0.982392	0.941806	0.962994	0.982986			0.278	0.860302	0.905582	0.886397	0.923522	0.943135
0.279	1.01175	0.997329	0.940535	0.962148	0.983731			0.279	0.825012	0.900535	0.904414	0.892927	0.925952
0.28	1.00162	0.97624	0.942569	0.959158	0.994645			0.28	0.851572	0.913327	0.891465	0.91801	0.920792
0.281	1.00144	0.965823	0.955671	0.948972	0.950811			0.281	0.857538	0.905482	0.892455	0.887996	0.934487
0.282	1.00825	0.973893	0.953969	0.945532	0.970945			0.282	0.871814	0.912663	0.892004	0.885222	0.925063
0.283	1.0006	0.997186	0.963791	0.948328	0.985482			0.283	0.848622	0.92802	0.894199	0.92131	0.936448
0.284	0.982689	0.982583	0.939088	0.935963	0.96031			0.284	0.835835	0.936379	0.91061	0.90874	0.927696
0.285	0.995097	0.963343	0.97057	0.941131	0.98916			0.285	0.861223	0.910745	0.901619	0.896939	0.925874
0.286	0.986401	0.98306	0.922821	0.936387	0.964054			0.286	0.859352	0.90608	0.889209	0.921638	0.954363
0.287	0.991975	0.964555	0.944148	0.941916	0.970442			0.287	0.850604	0.893346	0.874247	0.904109	0.956325
0.288	0.979196	0.96363	0.952952	0.980959	0.99716			0.288	0.856291	0.889179	0.892134	0.920757	0.938828
0.289	0.995077	0.979425	0.941315	0.956336	0.948511			0.289	0.834151	0.890781	0.875453	0.921666	0.924279
0.29	0.993916	0.979673	0.954259	0.937013	0.981701			0.29	0.845411	0.913119	0.911183	0.905918	0.920051
0.291	0.998309	0.955178	0.959275	0.96191	0.965087			0.291	0.832308	0.896235	0.89058	0.894295	0.925551
0.292	0.970031	0.98719	0.957468	0.945858	0.976616			0.292	0.851852	0.905997	0.87935	0.888596	0.915648
0.293	1.00567	0.978576	0.925311	0.962739	0.967443			0.293	0.853285	0.910878	0.912016	0.916445	0.934565
0.294	0.995047	0.971299	0.936878	0.954016	0.9767			0.294	0.833955	0.893669	0.910298	0.915639	0.916825
0.295	1.00368	0.994162	0.954057	0.965728	0.993472			0.295	0.841242	0.894533	0.883351	0.90994	0.907637
0.296	1.00296	1.00191	0.941964	0.960798	0.958392			0.296	0.857082	0.907574	0.89741	0.901541	0.930669
0.297	1.00133	0.980112	0.930353	0.966531	0.955523			0.297	0.885662	0.891221	0.887439	0.919876	0.925098
0.298	0.977285	0.978348	0.934686	0.956927	0.95652			0.298	0.861837	0.890573	0.876148	0.916435	0.933214
0.299	0.999079	0.98223	0.941	0.947808	0.963271			0.299	0.841931	0.901165	0.888723	0.911102	0.914201
0.3	1.0108	0.974332	0.939158	0.973286	0.974195			0.3	0.848008	0.880089	0.914464	0.927168	0.915535
0.301	0.997879	0.988039	0.960248	0.959211	0.970535			0.301	0.846212	0.892499	0.890815	0.888559	0.920879
0.302	1.01916	0.98201	0.932432	0.934984	0.966866			0.302	0.839176	0.915327	0.893418	0.890002	0.930425
0.303	0.976705	0.980351	0.933282	0.940161	0.967844			0.303	0.853769	0.899223	0.889955	0.924965	0.94201
0.304	1.01238	0.965385	0.967369	0.961125	0.968971			0.304	0.846565	0.901082	0.898512	0.915339	0.954825
0.305	0.9993	0.979425	0.929029	0.976664	0.955542			0.305	0.856542	0.88624	0.88979	0.894052	0.940153
0.306	1.00972	0.984805	0.953408	0.969177	0.9427			0.306	0.839725	0.90256	0.897818	0.906181	0.936666
0.307	0.994056	1.00593	0.946077	0.953231	0.951714			0.307	0.849748	0.894325	0.898651	0.900351	0.933859
0.308	0.999179	0.98595	0.950304	0.946088	0.983936			0.308	0.829879	0.884912	0.899832	0.934995	0.91958
0.309	1.01222	0.98533	0.940307	0.944597	0.978125			0.309	0.855444	0.893836	0.905169	0.898476	0.916319
0.31	0.978166	0.980265	0.964019	0.96557	0.977557			0.31	0.829451	0.90041	0.876035	0.895551	0.907724
0.311	1.00371	0.991291	0.933958	0.941396	0.973385			0.311	0.833602	0.877598	0.896733	0.916004	0.91958
0.312	0.982048	0.983422	0.943587	0.964044	0.980099			0.312	0.843122	0.900277	0.879454	0.909752	0.937041
0.313	1.00943	0.995851	0.958968	0.964573	0.963616			0.313	0.85093	0.907823	0.906792	0.892927	0.936509
0.314	1.0013	0.978844	0.929748	0.964167	1.00289			0.314	0.832392	0.892142	0.875193	0.906612	0.905963
0.315	1.00091	0.981247	0.946796	0.956239	0.993351			0.315	0.850344	0.883451	0.869526	0.903153	0.923442
0.316	0.996408	0.958126	0.947357	0.932991	0.983666			0.316	0.828679	0.887867	0.8783	0.905515	0.90938
0.317	0.996658	0.971632	0.94442	0.972951	1.01121			0.317	0.842499	0.896915	0.897219	0.893855	0.915901
0.318	0.995877	0.961703	0.935405	0.941952	0.965115			0.318	0.832448	0.892848	0.903234	0.895889	0.949237
0.319	0.987512	0.978596	0.96159	0.941352	0.964994			0.319	0.836626	0.891046	0.883863	0.912583	0.928873
0.32	0.998559	0.983498	0.966378	0.939923	0.998761			0.32	0.859874	0.894458	0.895735	0.907962	0.923668
0.321	0.972492	0.970097	0.941184	0.965208	0.979987			0.321	0.844267	0.878287	0.881025	0.92999	0.92617
0.322	1.00143	0.978739	0.938044	0.964397	0.954909			0.322	0.86328	0.898617	0.886154	0.912002	0.917566
0.323	0.998469	0.972777	0.956065	0.95929	0.972221			0.323	0.80799	0.884854	0.870342	0.915086	0.947886
0.324	0.996988	0.97231	0.947875	0.968198	0.970358			0.324	0.828381	0.900925	0.886814	0.897988	0.943449
0.325	0.986291	0.967579	0.953627	0.936739	0.939059			0.325	0.841158	0.88849	0.898096	0.903041	0.93134
0.326	1.00809	0.978977	0.950321	0.941555	0.983526			0.326	0.84945	0.890963	0.892151	0.913155	0.922648
0.327	1.02751	0.958631	0.955013	0.952799	0.988713			0.327	0.830158	0.926592	0.903286	0.91024	0.922945
0.328	1.01819	0.963334	0.968623	0.941131	0.988574			0.328	0.847887	0.898932	0.910706	0.911074	0.924776
0.329	1.00744	0.981877	0.956425	0.925521	0.981217			0.329	0.830326	0.921935	0.887456	0.91428	0.932804
0.33	0.995837	0.992884	0.96537	0.96534	0.96464			0.33	0.856682	0.893794	0.878283	0.901982	0.939447
0.331	0.99929	0.992007	0.944867	0.94054	0.947934			0.331	0.827311	0.891046	0.880296	0.898495	0.913643
0.332	1.00583	0.992131	0.9571	0.946044	0.983982			0.332	0.853136	0.89059	0.892689	0.894745	0.897925
0.333	0.997829	0.991291	0.922233	0.941819	0.96884			0.333	0.820005	0.882098	0.891396	0.887162	0.907305
0.334	0.9842	0.979712	0.967834	0.935787	0.968579			0.334	0.831545	0.887834	0.858886	0.88585	0.944565
0.335	1.00179	0.973941	0.962318	0.934288	0.956129			0.335	0.859734	0.910239	0.898087	0.922416	0.934121
0.336	0.987032	0.983699	0.938281	0.962739	0.960319			0.336	0.827078	0.868923	0.890485	0.898279	0.925316
0.337	0.993636	0.994229	0.968842	0.953567	0.982837			0.337	0.838264	0.908238	0.874308	0.905684	0.934653
0.338	1.01264	0.982726	0.937764	0.937771	0.957088			0.338	0.815519	0.901614	0.88257	0.894661	0.918926
0.339	1.02814	0.98656	0.955276	0.957959	0.975247			0.339	0.822574	0.918806	0.885911	0.878042	0.958112
0.34	0.98402	0.968828	0.935045	0.958302	0.959276			0.34	0.835956	0.894749	0.889712	0.906593	0.935367
0.341	0.983559	0.967827	0.950777	0.959793	0.964743			0.341	0.826817	0.878487	0.886736	0.899048	0.922134
0.342	0.979487	0.963744	0.93451	0.94831	0.972109			0.342	0.842396	0.888639	0.903425	0.908046	0.92033
0.343	0.974634	0.97891	0.910614	0.947578	0.966456			0.343	0.826622	0.876386	0.88539	0.904869	0.922666
0.344	0.99984	0.966119	0.956197	0.951803	0.987419			0.344	0.845114	0.896201	0.907582	0.884941	0.92311
0.345	0.975964	0.97746	0.9591	0.951035	0.972612			0.345	0.84329	0.898659	0.871574	0.890199	0.946622
0.346	0.996508	0.96838	0.946936	0.954713	0.95597			0.346	0.842638	0.883243	0.876556	0.906556	0.954843
0.347	0.974043	0.976716	0.939842	0.96676	0.961865			0.347	0.833695	0.895911	0.892134	0.889627	0.940371
0.348	1.01507	0.997987	0.93822	0.951732	0.969622			0.348	0.82813	0.898152	0.876321	0.896676	0.924226
0.349	1.00213	0.984233	0.93316	0.943283	0.956753			0.349	0.830652	0.879292	0.883099	0.895804	0.910819
0.35	0.979987	0.973569	0.922803	0.949748	0.984057			0.35	0.826873	0.859161	0.894677	0.914017	0.923825
0.351	1.01962	0.971203	0.93971	0.958161	0.984457			0.351	0.837873	0.889618	0.864796	0.914945	0.913765
0.352	0.977185	0.968227	0.965966	0.960463	0.980025			0.352	0.827618	0.892707	0.899085	0.882503	0.930198
0.353	1.00687	1.00056	0.937781	0.947658	0.964789			0.353	0.82852	0.886738	0.906358	0.884238	0.918874
0.354	0.967029	0.979921	0.95233	0.95929	0.978032			0.354	0.818404	0.874875	0.889903	0.89617	0.929971
0.355	1.00209	0.992093	0.944656	0.990484	0.979866			0.355	0.824258	0.8901	0.882709	0.922791	0.907985
0.356	1.01222	0.982773	0.944823	0.960569	0.98849			0.356	0.822806	0.894649	0.885573	0.896779	0.901273
0.357	0.99982	0.981304	0.950962	0.956988	0.956371			0.357	0.821689	0.889021	0.878725	0.908684	0.946413
0.358	0.974964	0.992112	0.95632	0.95391	0.967741			0.358	0.835137	0.895396	0.879454	0.901513	0.925612
0.359	0.993306	0.990519	0.935668	0.939817	0.959444			0.359	0.826045	0.884181	0.875801	0.907981	0.93263
0.36	0.99963	1.00135	0.931441	0.954122	0.975005			0.36	0.822397	0.886522	0.897428	0.911008	0.92434
0.361	0.990184	0.989431	0.955206	0.968312	0.969567			0.361	0.828409	0.875149	0.892811	0.899357	0.92284
0.362	0.986531	0.983746	0.958959	0.944421	0.97778			0.362	0.826268	0.893902	0.888237	0.893564	0.939674
0.363	0.985941	0.999008	0.934563	0.957165	0.948576			0.363	0.813286	0.881898	0.890997	0.901138	0.927277
0.364	0.985631	0.98925	0.934633	0.966866	0.981645			0.364	0.82235	0.879225	0.881893	0.879448	0.932029
0.365	0.99978	0.975181	0.95995	0.94054	0.970936			0.365	0.834802	0.902079	0.910689	0.881622	0.934034
0.366	0.981388	0.995174	0.932134	0.936572	0.969455			0.366	0.803561	0.860016	0.891518	0.879729	0.928829
0.367	0.966058	0.993256	0.927705	0.955119	0.957674			0.367	0.833388	0.883733	0.858634	0.898223	0.936492
0.368	1.00188	0.945144	0.932388	0.936695	0.962489			0.368	0.838078	0.882355	0.886796	0.901728	0.950257
0.369	0.996228	0.97871	0.955232	0.968127	0.968403			0.369	0.832913	0.875938	0.889712	0.900201	0.925499
0.37	0.983009	0.985931	0.939544	0.949563	0.980751			0.37	0.816878	0.871995	0.904631	0.903706	0.923241
0.371	1.01122	0.975352	0.936808	0.924983	0.950243			0.371	0.81243	0.896019	0.885833	0.882353	0.908491
0.372	0.996478	0.981944	0.930441	0.964979	0.95678			0.372	0.841791	0.880529	0.868892	0.908665	0.925647
0.373	1.00897	0.977289	0.936194	0.958673	0.977045			0.373	0.814989	0.875075	0.894746	0.907118	0.9242
0.374	1.00173	0.959099	0.936764	0.931571	0.983563			0.374	0.822378	0.906545	0.88441	0.891183	0.93494
0.375	0.982168	0.96259	0.945744	0.952711	0.982008			0.375	0.808484	0.873531	0.89045	0.894305	0.917915
0.376	0.985951	0.995231	0.945945	0.955577	0.949554			0.376	0.825524	0.884414	0.87968	0.893995	0.9206
0.377	0.974493	1.01227	0.940307	0.949289	0.957004			0.377	0.812914	0.910181	0.870021	0.901766	0.940842
0.378	0.986221	0.969877	0.982637	0.941872	0.974092			0.378	0.833211	0.889245	0.88336	0.913202	0.921803
0.379	0.9994	0.990938	0.943122	0.954695	0.973599			0.379	0.820042	0.888697	0.88625	0.902806	0.912283
0.38	0.995717	0.966119	0.969105	0.948584	0.964761			0.38	0.810029	0.889328	0.868875	0.905281	0.92148
0.381	0.98529	0.978605	0.960073	0.960913	0.947663			0.381	0.791956	0.892416	0.874464	0.883816	0.916808
0.382	0.980707	0.971623	0.954706	0.948434	0.988639			0.382	0.837408	0.876478	0.898972	0.886946	0.925795
0.383	0.968209	0.988573	0.975551	0.947808	0.976951			0.383	0.817604	0.878171	0.864562	0.895514	0.92114
0.384	0.974323	0.995088	0.945437	0.933009	0.98076			0.384	0.818116	0.885385	0.889539	0.906396	0.913268
0.385	0.990214	0.990099	0.925311	0.957191	0.975042			0.385	0.815501	0.88575	0.866376	0.891718	0.916842
0.386	1.0038	0.968742	0.957319	0.949862	0.964901			0.386	0.83872	0.872036	0.887239	0.902731	0.907741
0.387	1.01006	0.969191	0.968079	0.92994	0.98957			0.387	0.817892	0.862473	0.88677	0.911561	0.922134
0.388	0.966708	0.965614	0.96401	0.969318	0.960859			0.388	0.819958	0.865595	0.860917	0.913361	0.922369
0.389	1.00448	0.980084	0.941938	0.972158	0.966577			0.389	0.831889	0.880512	0.86484	0.877489	0.928036
0.39	0.985561	0.965146	0.941052	0.935919	0.977454			0.39	0.843727	0.880329	0.877649	0.912246	0.926475
0.391	0.978546	0.971575	0.951268	0.949086	0.981235			0.391	0.806055	0.892167	0.869014	0.900332	0.933014
0.392	0.986581	0.992417	0.961985	0.921456	0.948306			0.392	0.800182	0.897911	0.898912	0.894876	0.926127
0.393	0.994026	0.988849	0.946594	0.943319	0.973385			0.393	0.82933	0.890864	0.867894	0.883263	0.93841
0.394	0.9696	0.988411	0.928757	0.946247	0.96125			0.394	0.812448	0.884165	0.888532	0.885775	0.937137
0.395	0.98403	0.961855	0.948138	0.959899	0.955048			0.395	0.807311	0.865105	0.903937	0.89094	0.906826
0.396	0.990154	0.954682	0.934326	0.958444	0.966372			0.396	0.81015	0.887809	0.869457	0.88899	0.944791
0.397	0.981848	0.954625	0.935615	0.954881	0.959239			0.397	0.819828	0.871547	0.885642	0.90903	0.911699
0.398	1.00332	0.986055	0.935422	0.949501	0.961781			0.398	0.819782	0.888929	0.866801	0.894361	0.902031
0.399	1.00487	0.991492	0.950409	0.958752	0.986059			0.399	0.804817	0.901688	0.869422	0.873561	0.9087
0.4	0.986421	0.962046	0.922926	0.931624	0.969036			0.4	0.813435	0.891229	0.875176	0.89393	0.92434
0.401	0.974844	0.966138	0.954987	0.937498	0.986571			0.401	0.807246	0.879026	0.877215	0.873805	0.929997
0.402	0.976365	0.965623	0.944946	0.937833	0.979373			0.402	0.812932	0.88878	0.872659	0.9029	0.905911
0.403	0.977495	0.964116	0.941438	0.969618	0.976737			0.403	0.800238	0.872717	0.896404	0.878698	0.914463
0.404	0.986281	0.95329	0.939	0.92426	0.950625			0.404	0.841084	0.884961	0.880652	0.878688	0.908674
0.405	0.995037	0.966615	0.955127	0.961001	0.962657			0.405	0.819186	0.890938	0.898217	0.887368	0.93345
0.406	0.987252	0.990023	0.931836	0.979707	0.967006			0.406	0.80021	0.865171	0.904813	0.90291	0.928646
0.407	0.997348	0.956924	0.935352	0.947199	0.96641			0.407	0.800108	0.884331	0.873284	0.872165	0.925883
0.408	0.98423	0.990261	0.960652	0.960745	0.967155			0.408	0.818916	0.896127	0.874976	0.865444	0.91924
0.409	0.983139	0.981238	0.919401	0.961513	0.980136			0.409	0.823635	0.872061	0.893661	0.890649	0.911342
0.41	0.975944	0.964173	0.94791	0.968145	0.963001			0.41	0.786046	0.872103	0.881034	0.868087	0.929753
0.411	0.991054	0.973407	0.940561	0.940241	0.963718			0.411	0.80799	0.875855	0.899181	0.866306	0.927896
0.412	1.00629	0.984662	0.944349	0.944174	0.957656			0.412	0.818004	0.862639	0.875992	0.880657	0.929474
0.413	1.00081	0.974132	0.947313	0.969141	0.976467			0.413	0.814589	0.86337	0.871331	0.876617	0.9259
0.414	0.989773	0.997787	0.936299	0.936554	0.966056			0.414	0.786939	0.886506	0.888645	0.906668	0.928419
0.415	0.983449	0.970936	0.93465	0.950383	0.948083			0.415	0.779578	0.859759	0.889521	0.888465	0.92828
0.416	0.991765	0.960234	0.917831	0.971919	0.979913			0.416	0.80049	0.866641	0.879689	0.883572	0.93664
0.417	0.982309	0.96899	0.954268	0.947067	0.974735			0.417	0.802779	0.888415	0.8873	0.898401	0.907689
0.418	0.989403	0.984242	0.951154	0.951741	0.968505			0.418	0.83282	0.878736	0.872208	0.906321	0.907079
0.419	0.972942	0.977699	0.943779	0.948716	0.967965			0.419	0.786837	0.871406	0.878031	0.888746	0.917767
0.42	0.978266	0.979826	0.908474	0.93517	0.957172			0.42	0.819568	0.905341	0.866436	0.894314	0.921785
0.421	0.994757	0.973884	0.930406	0.946035	0.988555			0.421	0.817194	0.878279	0.881147	0.906293	0.904045
0.422	0.971842	0.97789	0.943069	0.931801	0.990594			0.422	0.819298	0.888614	0.879637	0.862847	0.930111
0.423	0.995237	0.975209	0.921058	0.943186	0.959174			0.423	0.802081	0.889668	0.873483	0.880901	0.905222
0.424	0.996778	0.958288	0.930266	0.962254	0.967993			0.424	0.824909	0.878686	0.886692	0.921703	0.903025
0.425	0.995087	0.955446	0.928398	0.952711	0.954909			0.425	0.824063	0.893055	0.905013	0.865069	0.923686
0.426	0.965057	0.970144	0.935712	0.959114	0.969539			0.426	0.825589	0.883476	0.883099	0.906593	0.935568
0.427	0.98445	0.969181	0.962739	0.954016	0.970554			0.427	0.808316	0.88111	0.878743	0.903519	0.917174
0.428	0.998329	0.977518	0.940675	0.940011	0.983303			0.428	0.818507	0.872767	0.877102	0.879363	0.93528
0.429	1.01675	0.985358	0.957898	0.939094	0.962303			0.429	0.823988	0.880388	0.879966	0.8833	0.918717
0.43	0.971642	0.974198	0.957372	0.938944	0.952869			0.43	0.803049	0.881292	0.893974	0.897885	0.909964
0.431	0.989853	0.979092	0.931415	0.947622	0.963839			0.431	0.807051	0.881375	0.897237	0.889149	0.918385
0.432	0.982999	0.961894	0.938176	0.955189	0.989188			0.432	0.799047	0.881492	0.894434	0.891549	0.914829
0.433	0.990444	0.982296	0.934703	0.929181	0.953028			0.433	0.822062	0.862722	0.895128	0.895101	0.93025
0.434	0.999069	0.971346	0.936229	0.932524	0.964976			0.434	0.802295	0.90246	0.879463	0.912386	0.910862
0.435	0.98458	0.991091	0.918208	0.957165	0.95923			0.435	0.790429	0.883102	0.859363	0.884556	0.905257
0.436	0.993906	0.988172	0.942999	0.949774	0.970479			0.436	0.775744	0.88663	0.874959	0.899582	0.945497
0.437	0.996688	0.951706	0.943297	0.942172	0.983582			0.437	0.802221	0.883949	0.886267	0.905543	0.930425
0.438	0.980597	0.98367	0.938062	0.946749	0.973208			0.438	0.817502	0.867031	0.858218	0.896751	0.921062
0.439	0.950658	0.956161	0.948734	0.942895	0.973003			0.439	0.77942	0.883492	0.867417	0.892336	0.915936
0.44	0.995547	0.982096	0.93387	0.949272	0.966177			0.44	0.807172	0.875946	0.879437	0.876889	0.912431
0.441	0.975924	0.963925	0.959389	0.934005	0.964789			0.441	0.824007	0.895039	0.885503	0.895261	0.902293
0.442	0.990094	0.983975	0.939395	0.935108	0.977268			0.442	0.789722	0.864798	0.87554	0.9044	0.919562
0.443	1.00311	0.962151	0.944183	0.953646	0.955849			0.443	0.811331	0.871198	0.896681	0.906321	0.91883
0.444	0.978086	0.949226	0.929064	0.952993	0.955104			0.444	0.801104	0.881741	0.880739	0.89513	0.913905
0.445	0.998069	0.98946	0.932914	0.937436	0.976728			0.445	0.804789	0.871331	0.857116	0.907643	0.933328
0.446	0.980057	0.994029	0.961695	0.947164	0.971857			0.446	0.808698	0.869571	0.875861	0.889243	0.907672
0.447	1.0026	0.959566	0.932704	0.951212	0.979429			0.447	0.795464	0.872759	0.853288	0.886281	0.93263
0.448	0.985541	0.958011	0.943464	0.948425	0.975499			0.448	0.815687	0.878213	0.8582	0.9041	0.91761
0.449	0.99988	0.970421	0.948164	0.956592	0.950271			0.449	0.788047	0.857318	0.873692	0.889505	0.918621
0.45	0.971662	0.952174	0.961195	0.945867	0.987596			0.45	0.799838	0.85389	0.879697	0.875595	0.918011
0.451	0.971051	0.980837	0.943858	0.932929	0.965646			0.451	0.815808	0.893063	0.883681	0.898429	0.915918
0.452	0.975754	0.954644	0.952698	0.932136	0.944823			0.452	0.787935	0.876436	0.873353	0.888502	0.905893
0.453	0.971471	0.981781	0.938272	0.954122	0.97535			0.453	0.804072	0.844925	0.871782	0.887378	0.922256
0.454	1.00284	0.98905	0.922479	0.943345	0.967248			0.454	0.795511	0.893213	0.867686	0.8857	0.912867
0.455	0.959654	0.988888	0.952365	0.954501	0.963551			0.455	0.791034	0.88067	0.879984	0.870262	0.921646
0.456	0.985391	0.968599	0.941201	0.964511	0.988862			0.456	0.792281	0.878794	0.86779	0.902169	0.915256
0.457	0.985721	0.988821	0.9385	0.943751	0.9553			0.457	0.800871	0.897795	0.861958	0.89946	0.918368
0.458	1.0002	0.978128	0.963563	0.945479	0.962256			0.458	0.78264	0.880993	0.877883	0.894305	0.89456
0.459	0.988763	0.960196	0.952452	0.94854	0.955812			0.459	0.786186	0.863013	0.862948	0.866953	0.916459
0.46	0.967109	0.973502	0.941078	0.927179	0.971261			0.46	0.785376	0.873165	0.865369	0.911243	0.939578
0.461	0.973052	0.977852	0.941982	0.963488	0.956771			0.461	0.802276	0.865288	0.876764	0.861516	0.90204
0.462	0.972002	0.975877	0.948936	0.942481	0.981207			0.462	0.826631	0.887884	0.865985	0.900435	0.908081
0.463	0.991635	0.985788	0.949681	0.928661	0.96194			0.463	0.803402	0.887751	0.885312	0.898795	0.901499
0.464	1.00932	0.950247	0.950128	0.949695	0.967807			0.464	0.797363	0.872236	0.878057	0.880919	0.903862
0.465	0.99947	0.979034	0.939965	0.933626	0.971466			0.465	0.813202	0.873282	0.883863	0.907615	0.906033
0.466	1.00547	0.962933	0.937088	0.936016	0.956836			0.466	0.798703	0.868251	0.866089	0.868396	0.947468
0.467	0.996308	0.967311	0.913735	0.939456	0.97927			0.467	0.788224	0.871837	0.883776	0.864769	0.897071
0.468	0.980027	0.939764	0.935615	0.958788	0.983247			0.468	0.775306	0.88482	0.867296	0.889187	0.928393
0.469	0.959784	0.963429	0.935536	0.941325	0.957321			0.469	0.77875	0.873713	0.882344	0.88331	0.925368
0.47	1.00075	0.977165	0.928363	0.930063	0.94866			0.47	0.79686	0.872883	0.877493	0.890208	0.902275
0.471	0.979577	0.959814	0.946156	0.954704	0.96844			0.471	0.80357	0.865487	0.880201	0.899235	0.914742
0.472	1.00413	0.965003	0.929652	0.948275	0.96871			0.472	0.807069	0.875647	0.859806	0.883984	0.935455
0.473	0.983679	0.973244	0.938211	0.941819	0.964091			0.473	0.797176	0.868351	0.879732	0.860513	0.89354
0.474	0.993236	0.983098	0.926732	0.938944	0.978153			0.474	0.805012	0.872476	0.884635	0.86341	0.902615
0.475	0.981578	0.986675	0.946901	0.925609	0.953288			0.475	0.808298	0.857277	0.891873	0.899151	0.908299
0.476	0.987172	0.967121	0.92874	0.93883	0.964575			0.476	0.77526	0.868434	0.867938	0.88973	0.914428
0.477	0.961015	0.978796	0.938404	0.940302	0.965981			0.477	0.789871	0.859767	0.865473	0.901213	0.922954
0.478	0.988412	0.978844	0.938614	0.957447	0.985491			0.478	0.776963	0.881002	0.878873	0.877376	0.898352
0.479	0.967229	0.951153	0.940131	0.923034	0.953931			0.479	0.816431	0.890548	0.866176	0.864441	0.909964
0.48	0.971602	0.95927	0.936071	0.927532	0.93646			0.48	0.792989	0.866084	0.873049	0.874124	0.915605
0.481	0.983339	0.964355	0.947778	0.956362	0.964305			0.481	0.7978	0.869397	0.86195	0.883431	0.929099
0.482	0.96918	0.981772	0.944034	0.946837	0.963448			0.482	0.77982	0.877889	0.858088	0.892027	0.924191
0.483	0.964497	0.987304	0.920163	0.942075	0.953689			0.483	0.81149	0.858215	0.879532	0.901775	0.907907
0.484	1.00054	0.988573	0.938132	0.967166	0.954173			0.484	0.807246	0.874303	0.861542	0.857401	0.902624
0.485	0.977175	0.997787	0.924724	0.947375	0.96247			0.485	0.803486	0.868533	0.883386	0.879851	0.897332
0.486	0.976495	0.997749	0.932213	0.912319	0.979587			0.486	0.800834	0.858248	0.864484	0.885072	0.913896
0.487	0.967849	0.955798	0.942973	0.928723	0.982083			0.487	0.788819	0.875913	0.860231	0.876533	0.915177
0.488	0.986161	0.968447	0.939316	0.959052	0.980537			0.488	0.79727	0.89601	0.861698	0.891699	0.920887
0.489	0.975044	0.990948	0.945042	0.959696	0.950224			0.489	0.776563	0.845099	0.870029	0.902291	0.904123
0.49	0.997008	0.964412	0.918489	0.939606	0.972472			0.49	0.789899	0.860099	0.864336	0.899601	0.903374
0.491	0.985671	0.976421	0.932011	0.948293	0.957414			0.491	0.784892	0.879914	0.866792	0.901222	0.907828
0.492	0.982499	0.968771	0.921751	0.930486	0.963597			0.492	0.797232	0.887361	0.851318	0.892392	0.911298
0.493	0.974894	0.989794	0.9385	0.942463	0.977799			0.493	0.78344	0.874909	0.865777	0.870262	0.89524
0.494	0.992675	0.961684	0.930266	0.95063	0.96817			0.494	0.806511	0.879333	0.86372	0.88675	0.902729
0.495	0.989413	0.9723	0.949927	0.95354	0.951556			0.495	0.804156	0.872684	0.86024	0.880085	0.936414
0.496	0.974073	0.977632	0.961055	0.96273	0.963793			0.496	0.785506	0.869114	0.880678	0.875098	0.903531
0.497	0.982208	0.982688	0.967176	0.933723	0.970749			0.497	0.788112	0.867861	0.870394	0.891914	0.898867
0.498	0.98398	0.982478	0.969044	0.943195	0.956231			0.498	0.808958	0.890747	0.890476	0.898457	0.904925
0.499	0.996848	0.971928	0.947673	0.927047	0.954881			0.499	0.783375	0.868691	0.886111	0.887209	0.942124
0.5	1.00096	0.957744	0.954197	0.941987	0.966587			0.5	0.786595	0.857949	0.860804	0.841223	0.921995
0.501	0.991184	0.975772	0.935361	0.950753	0.977762			0.501	0.7829	0.878163	0.882197	0.866306	0.904664
0.502	0.941862	0.975868	0.93736	0.954642	0.971802			0.502	0.796497	0.888423	0.892863	0.887949	0.928393
0.503	0.979216	0.95557	0.938702	0.935849	0.975229			0.503	0.787721	0.868218	0.865386	0.875323	0.901996
0.504	0.981288	0.94522	0.939684	0.951274	1.00196			0.504	0.782379	0.862274	0.852872	0.864431	0.904708
0.505	0.979707	0.966043	0.948269	0.953999	0.946742			0.505	0.780118	0.878013	0.87081	0.876739	0.913076
0.506	0.98505	0.96838	0.958731	0.934702	0.963206			0.506	0.782854	0.868492	0.884436	0.877254	0.911594
0.507	0.972762	0.981362	0.939298	0.952685	0.961772			0.507	0.783235	0.877366	0.876451	0.868574	0.904856
0.508	0.976535	0.98946	0.963116	0.919895	0.981421			0.508	0.796255	0.851972	0.861273	0.879607	0.909328
0.509	0.985481	0.968962	0.929161	0.946282	0.966317			0.509	0.798042	0.873348	0.862626	0.85907	0.911464
0.51	0.982158	0.975534	0.954627	0.942975	0.961092			0.51	0.802155	0.881035	0.871149	0.875211	0.894089
0.511	0.988392	0.973855	0.935913	0.928273	0.966354			0.511	0.787554	0.88018	0.863373	0.877536	0.913294
0.512	0.997588	0.961293	0.968693	0.921835	0.968701			0.512	0.777112	0.855509	0.867938	0.868162	0.91625
0.513	0.987262	0.986255	0.928442	0.94719	0.945615			0.513	0.780565	0.86249	0.871036	0.879598	0.910226
0.514	0.979947	0.949837	0.945603	0.936184	0.972873			0.514	0.800973	0.857335	0.868146	0.890527	0.915064
0.515	0.988583	0.987409	0.937308	0.933573	0.976551			0.515	0.790299	0.850337	0.887213	0.875586	0.920626
0.516	0.986681	0.964812	0.940894	0.939403	0.955756			0.516	0.785925	0.849424	0.868554	0.864966	0.907332
0.517	0.98408	0.973349	0.937518	0.957315	0.951733			0.517	0.807804	0.878528	0.862765	0.880872	0.93671
0.518	0.95358	0.970039	0.9256	0.951856	0.959081			0.518	0.787824	0.859875	0.878491	0.888943	0.901404
0.519	1.01769	0.972901	0.96644	0.948451	0.955784			0.519	0.778601	0.872302	0.860596	0.851412	0.938175
0.52	0.971672	0.964211	0.944428	0.946308	0.977836			0.52	0.788866	0.868484	0.869153	0.874695	0.908953
0.521	0.942593	0.957134	0.948743	0.955957	0.949433			0.521	0.791183	0.869048	0.856942	0.868696	0.923119
0.522	0.98436	0.970736	0.955653	0.946732	0.979969			0.522	0.780304	0.865777	0.881468	0.88779	0.91013
0.523	1.00268	0.957945	0.933458	0.93233	0.966652			0.523	0.791379	0.871024	0.867808	0.884809	0.918586
0.524	0.973613	0.972491	0.92724	0.94293	0.947487			0.524	0.782593	0.886921	0.865985	0.881322	0.911804
0.525	0.976495	0.956466	0.921181	0.960172	0.964342			0.525	0.793566	0.850794	0.866758	0.885372	0.908866
0.526	0.974333	0.982468	0.940789	0.951556	0.957674			0.526	0.795594	0.859087	0.874716	0.887874	0.917749
0.527	0.981608	0.972386	0.934782	0.936907	0.954387			0.527	0.785422	0.870858	0.850372	0.871968	0.901683
0.528	0.964357	0.962981	0.926206	0.96736	0.957498			0.528	0.794515	0.843015	0.870559	0.876795	0.901499
0.529	0.979297	0.98471	0.921163	0.954934	0.96451			0.529	0.769481	0.860805	0.857949	0.885719	0.908665
0.53	0.996958	0.980742	0.940508	0.958338	0.957842			0.53	0.822676	0.863984	0.868311	0.871677	0.884587
0.531	0.952759	0.968094	0.953601	0.941131	0.960617			0.531	0.781644	0.856256	0.875731	0.893339	0.905754
0.532	0.976255	0.989994	0.961818	0.947146	0.976206			0.532	0.777763	0.878038	0.855484	0.866297	0.890018
0.533	0.980237	0.968475	0.950164	0.929305	0.96478			0.533	0.793324	0.862191	0.870229	0.864263	0.895589
0.534	0.974383	0.962924	0.93879	0.932189	0.942784			0.534	0.795697	0.842858	0.884184	0.870412	0.903452
0.535	0.967879	0.95597	0.936071	0.934191	0.981245			0.535	0.777596	0.863661	0.862522	0.890293	0.91101
0.536	0.991695	0.962666	0.937088	0.956115	0.969865			0.536	0.761747	0.866167	0.847552	0.867637	0.886148
0.537	0.963756	0.976716	0.928942	0.946414	0.97561			0.537	0.782482	0.868923	0.864032	0.909105	0.902624
0.538	0.994697	0.961407	0.917006	0.928387	0.964268			0.538	0.785767	0.860149	0.847743	0.860401	0.880185
0.539	0.989823	0.951115	0.91	0.949615	0.982595			0.539	0.788112	0.854205	0.862679	0.885897	0.88593
0.54	0.982268	0.967445	0.938509	0.953037	0.976523			0.54	0.793826	0.872261	0.877536	0.870384	0.897786
0.541	0.972762	0.95845	0.915296	0.926685	0.961753			0.541	0.800676	0.872609	0.886614	0.865444	0.917496
0.542	0.977966	0.981047	0.915796	0.935319	0.994375			0.542	0.763646	0.871912	0.865733	0.852115	0.89368
0.543	0.959554	0.97437	0.921628	0.93995	0.965013			0.543	0.79028	0.861693	0.874221	0.881772	0.897855
0.544	0.995467	0.948397	0.960345	0.948372	0.963672			0.544	0.789955	0.850337	0.874169	0.885662	0.891474
0.545	0.980017	0.955293	0.914823	0.958073	0.981356			0.545	0.784278	0.874377	0.849878	0.894305	0.909154
0.546	0.967919	0.9355	0.919576	0.948892	0.978749			0.546	0.758359	0.850594	0.869274	0.879495	0.915212
0.547	0.981078	0.961312	0.932221	0.920935	0.970088			0.547	0.774767	0.868467	0.837059	0.888409	0.879287
0.548	0.974053	0.971041	0.929503	0.93748	0.942337			0.548	0.784027	0.855027	0.876981	0.867431	0.91883
0.549	0.983029	0.963649	0.932748	0.92882	0.977343			0.549	0.788931	0.861693	0.850233	0.870899	0.907637
0.55	0.970751	0.953891	0.951049	0.945806	0.973627			0.55	0.778275	0.868857	0.868814	0.840829	0.90897
0.551	0.98444	0.967865	0.953733	0.932418	0.946406			0.551	0.769453	0.85985	0.89544	0.876514	0.92468
0.552	0.997048	0.960701	0.92724	0.962536	0.963281			0.552	0.793314	0.861693	0.862479	0.884078	0.925194
0.553	1.02808	0.986722	0.946007	0.948257	0.981487			0.553	0.772719	0.870028	0.883932	0.851187	0.916686
0.554	0.982298	0.979797	0.940815	0.937692	0.966298			0.554	0.771361	0.861743	0.853688	0.889149	0.896304
0.555	0.997598	0.974351	0.939184	0.93457	0.954741			0.555	0.791797	0.875017	0.85492	0.882794	0.910217
0.556	0.998789	0.983517	0.936133	0.938609	0.974167			0.556	0.772961	0.86073	0.886397	0.881135	0.890672
0.557	0.983609	0.963868	0.947024	0.949033	0.956827			0.557	0.767135	0.870243	0.857706	0.867168	0.900445
0.558	0.971391	0.961665	0.971806	0.934896	0.994804			0.558	0.79378	0.844028	0.860856	0.856539	0.908831
0.559	0.961895	0.956953	0.93066	0.952711	0.968766			0.559	0.783999	0.858945	0.832165	0.879241	0.910017
0.56	0.965518	0.951764	0.93109	0.935963	0.960831			0.56	0.75983	0.868027	0.842648	0.865837	0.9036
0.561	0.973413	0.989746	0.93943	0.92411	0.967592			0.561	0.772505	0.846029	0.85131	0.868828	0.91489
0.562	0.976605	0.95784	0.942701	0.936598	0.948315			0.562	0.756954	0.845796	0.86779	0.85966	0.913809
0.563	0.973353	0.969572	0.919655	0.933476	0.962983			0.563	0.753222	0.854131	0.856248	0.86624	0.902798
0.564	0.987142	0.937733	0.938079	0.929005	0.960682			0.564	0.79552	0.882728	0.868875	0.895233	0.88498
0.565	0.967149	0.978443	0.90323	0.956971	0.977501			0.565	0.786158	0.861369	0.86746	0.871274	0.900785
0.566	0.986831	0.984157	0.920444	0.944483	0.9637			0.566	0.76869	0.853176	0.85564	0.876233	0.920051
0.567	0.974073	0.974818	0.961669	0.940144	0.948157			0.567	0.78867	0.878511	0.844566	0.891652	0.886557
0.568	0.993075	0.980265	0.953075	0.941802	0.972547			0.568	0.754823	0.860838	0.865464	0.872999	0.921384
0.569	0.96849	0.97437	0.942368	0.92747	0.97087			0.569	0.772998	0.877474	0.864171	0.887809	0.907715
0.57	0.967749	0.96982	0.9772	0.942789	0.971038			0.57	0.779978	0.83532	0.840088	0.907784	0.901839
0.571	0.962295	0.965242	0.927661	0.941819	0.945782			0.571	0.756275	0.854222	0.872043	0.895111	0.896417
0.572	0.988182	0.948416	0.961827	0.944668	0.968663			0.572	0.764865	0.839911	0.867556	0.871546	0.917662
0.573	0.997658	0.987981	0.938071	0.947525	0.979326			0.573	0.784036	0.856463	0.847057	0.864366	0.902485
0.574	0.975324	0.984471	0.936229	0.934605	0.965544			0.574	0.774683	0.854969	0.847526	0.89408	0.898082
0.575	0.98488	0.975839	0.94527	0.971452	0.989747			0.575	0.776479	0.845489	0.861464	0.892636	0.916415
0.576	0.983309	0.963639	0.949129	0.955807	0.961288			0.576	0.780434	0.853525	0.867886	0.887781	0.916398
0.577	0.96891	0.974513	0.921251	0.937066	0.937056			0.577	0.756135	0.858663	0.868033	0.850934	0.888013
0.578	0.9846	0.952441	0.947726	0.942816	0.949954			0.578	0.769965	0.874269	0.851839	0.872202	0.885616
0.579	0.988983	0.976793	0.95425	0.946643	0.982232			0.579	0.78089	0.863934	0.836148	0.882475	0.905736
0.58	0.976004	0.955617	0.928319	0.929702	0.957358			0.58	0.785404	0.858298	0.862028	0.891408	0.908648
0.581	0.960074	0.984757	0.943665	0.926324	0.937559			0.581	0.783496	0.846958	0.866836	0.873374	0.900314
0.582	0.976725	0.960301	0.933484	0.980615	0.978879			0.582	0.76037	0.839255	0.87784	0.88241	0.888283
0.583	0.991014	0.968055	0.927635	0.953161	0.967276			0.583	0.766437	0.86728	0.854833	0.873927	0.89708
0.584	0.973032	0.971508	0.92888	0.925521	0.95625			0.584	0.794617	0.837063	0.865898	0.891286	0.904507
0.585	0.959003	0.976583	0.931871	0.944791	0.951919			0.585	0.791434	0.867147	0.877146	0.897717	0.903077
0.586	0.975034	0.961407	0.936308	0.938327	0.968682			0.586	0.744111	0.872634	0.871618	0.875595	0.882966
0.587	0.983289	0.962571	0.934054	0.943204	0.951668			0.587	0.759346	0.854629	0.872043	0.871377	0.912362
0.588	0.949907	0.974504	0.932923	0.957685	0.952208			0.588	0.759607	0.857086	0.852099	0.862791	0.907759
0.589	0.981678	0.965862	0.957916	0.921156	1.00375			0.589	0.7935	0.864897	0.864692	0.882653	0.91509
0.59	0.978886	0.970898	0.911929	0.952367	0.950001			0.59	0.784362	0.848502	0.865759	0.872455	0.921846
0.591	0.975104	0.958908	0.943551	0.931033	0.952264			0.591	0.792123	0.848469	0.861203	0.849781	0.902118
0.592	0.987352	0.951859	0.95539	0.933529	0.961027			0.592	0.763562	0.849349	0.875931	0.865509	0.895397
0.593	0.981798	0.954034	0.930617	0.9274	0.96776			0.593	0.766214	0.857783	0.856803	0.86086	0.894203
0.594	0.963296	0.972043	0.940193	0.958108	0.969967			0.594	0.758574	0.873456	0.866671	0.845169	0.9121
0.595	0.991955	0.938581	0.92689	0.933564	0.982399			0.595	0.785488	0.858007	0.850511	0.877451	0.902833
0.596	0.975604	0.954339	0.940438	0.951318	0.948325			0.596	0.763059	0.855891	0.86234	0.866259	0.899616
0.597	0.973533	0.95433	0.948725	0.943319	0.96153			0.597	0.776246	0.833569	0.857133	0.87104	0.909127
0.598	0.965548	0.969915	0.921146	0.933123	0.962005			0.598	0.777689	0.852819	0.832147	0.862379	0.886819
0.599	0.970581	0.946861	0.936799	0.926456	0.960524			0.599	0.768047	0.869654	0.845894	0.864825	0.870151
0.6	0.974754	0.955913	0.940763	0.939129	0.983191			0.6	0.773054	0.838076	0.842622	0.877264	0.913216
0.601	0.987282	0.983136	0.928301	0.92531	0.962154			0.601	0.769536	0.841687	0.854668	0.886412	0.886008
0.602	0.958943	0.961836	0.937141	0.928123	0.983759			0.602	0.76614	0.869878	0.860058	0.866925	0.905309
0.603	0.975934	0.937752	0.933703	0.928387	0.980863			0.603	0.782426	0.847672	0.850312	0.876992	0.903836
0.604	0.98394	0.967579	0.94862	0.922329	0.940083			0.604	0.757243	0.858555	0.857619	0.869071	0.896295
0.605	0.966838	0.938839	0.947445	0.952076	0.961297			0.605	0.763087	0.853408	0.85006	0.876467	0.896068
0.606	0.976205	0.959137	0.937264	0.948037	0.961493			0.606	0.762129	0.857617	0.860275	0.870168	0.921864
0.607	0.960344	0.955589	0.935335	0.922778	0.946583			0.607	0.775027	0.839462	0.871479	0.867647	0.898596
0.608	0.980077	0.949551	0.928258	0.951891	0.96844			0.608	0.743758	0.868409	0.844792	0.889955	0.892677
0.609	0.970601	0.958937	0.935712	0.940593	0.96871			0.609	0.75849	0.864831	0.849097	0.859313	0.889591
0.61	0.952649	0.953805	0.954268	0.934235	0.972081			0.61	0.769462	0.852304	0.872572	0.869718	0.890977
0.611	0.948967	0.971737	0.939518	0.933106	0.95001			0.611	0.7448	0.868342	0.858174	0.878323	0.903095
0.612	0.989003	0.970507	0.929222	0.936492	0.986664			0.612	0.772682	0.854313	0.862132	0.877901	0.879697
0.613	0.981428	0.967092	0.939798	0.957482	0.981896			0.613	0.771975	0.861851	0.838474	0.876308	0.905475
0.614	0.977595	0.969791	0.939132	0.933053	0.983135			0.614	0.766986	0.837819	0.874889	0.884837	0.89708
0.615	0.982258	0.947586	0.928705	0.95526	0.962657			0.615	0.758304	0.869264	0.832807	0.862379	0.884108
0.616	0.96963	0.959776	0.927012	0.937542	0.941741			0.616	0.760649	0.849175	0.874855	0.86595	0.920321
0.617	0.981558	0.973426	0.934089	0.942816	0.957274			0.617	0.76425	0.858862	0.87607	0.88735	0.885276
0.618	0.970701	0.983851	0.943753	0.935461	0.944702			0.618	0.765879	0.856754	0.874681	0.869887	0.897908
0.619	0.949767	0.970631	0.947427	0.925327	0.971671			0.619	0.752915	0.850296	0.856942	0.863307	0.894316
0.62	0.951258	0.972262	0.926635	0.937374	0.967779			0.62	0.756228	0.844825	0.868814	0.83931	0.901142
0.621	0.975334	0.971661	0.937009	0.939429	0.942132			0.621	0.771686	0.852006	0.861481	0.868631	0.876541
0.622	0.986471	0.964097	0.939824	0.934543	0.96221			0.622	0.75687	0.860174	0.860353	0.862425	0.895563
0.623	0.95365	0.970087	0.935475	0.935699	0.935278			0.623	0.779076	0.852446	0.849765	0.875464	0.902223
0.624	0.975014	0.948978	0.933563	0.941123	0.952189			0.624	0.753222	0.863387	0.854833	0.871705	0.903008
0.625	0.989193	0.942464	0.929047	0.931315	0.962154			0.625	0.733242	0.855376	0.838318	0.867665	0.910505
0.626	0.972532	0.953442	0.926355	0.924613	0.962321			0.626	0.770402	0.868442	0.855128	0.872633	0.913111
0.627	0.972932	0.974418	0.943122	0.934499	0.963681			0.627	0.773994	0.854513	0.872225	0.864197	0.901011
0.628	0.972972	0.975496	0.940964	0.946361	0.95353			0.628	0.759783	0.869928	0.854486	0.876504	0.906198
0.629	0.9852	0.952145	0.903125	0.94615	0.96667			0.629	0.741273	0.848569	0.846771	0.874752	0.878877
0.63	0.977105	0.949665	0.941552	0.917751	0.973217			0.63	0.777503	0.857816	0.863	0.875567	0.909921
0.631	0.998069	0.942921	0.951646	0.938274	0.97968			0.631	0.759216	0.838524	0.859632	0.86834	0.896513
0.632	0.989573	0.959204	0.954469	0.939482	0.946471			0.632	0.750216	0.864956	0.869057	0.852162	0.91373
0.633	0.962235	0.935539	0.942394	0.945329	0.951789			0.633	0.753353	0.873697	0.875046	0.872221	0.904917
0.634	0.962756	0.961836	0.928135	0.942093	0.965618			0.634	0.760872	0.840176	0.869795	0.876795	0.908508
0.635	0.973213	0.953271	0.932186	0.952094	0.949843			0.635	0.754348	0.864275	0.85525	0.879476	0.9104
0.636	0.967349	0.958593	0.929126	0.924613	0.979289			0.636	0.765609	0.851864	0.855831	0.886159	0.88742
0.637	0.976465	0.952536	0.931634	0.970244	0.964976			0.637	0.778685	0.860556	0.847543	0.86954	0.902084
0.638	0.976725	0.979444	0.926925	0.951441	0.966102			0.638	0.764539	0.860307	0.849071	0.861254	0.896835
0.639	0.963867	0.96673	0.926767	0.939703	0.951547			0.639	0.773622	0.839421	0.838812	0.856005	0.883907
0.64	0.978246	0.975448	0.918296	0.953108	0.950485			0.64	0.726411	0.876677	0.836426	0.865059	0.898806
0.641	0.959894	0.972338	0.932458	0.954413	0.944041			0.641	0.750877	0.824902	0.846398	0.861844	0.936788
0.642	0.947136	0.966815	0.927381	0.943998	0.94798			0.642	0.739896	0.871098	0.861863	0.876748	0.894116
0.643	0.947406	0.96611	0.941315	0.944633	0.963122			0.643	0.769974	0.853176	0.86983	0.872755	0.905126
0.644	0.958243	0.962723	0.958056	0.942551	0.962266			0.644	0.736117	0.865296	0.856274	0.872689	0.893872
0.645	0.976435	0.981762	0.931722	0.956283	0.963905			0.645	0.765767	0.831717	0.859997	0.877207	0.918909
0.646	0.970501	0.970717	0.940105	0.939456	0.950774			0.646	0.761589	0.852363	0.836608	0.879926	0.898631
0.647	0.994296	0.965251	0.941675	0.938927	0.973785			0.647	0.768866	0.848486	0.858938	0.866006	0.913678
0.648	0.997078	0.926229	0.94385	0.945153	0.964836			0.648	0.748067	0.853043	0.856196	0.87866	0.884535
0.649	1.01113	0.973512	0.938106	0.932339	0.964165			0.649	0.755856	0.857692	0.854989	0.838776	0.898117
0.65	0.996848	0.965652	0.921198	0.94779	0.954369			0.65	0.748551	0.868376	0.861516	0.86461	0.899686
0.651	0.96959	0.942349	0.941149	0.950206	0.962107			0.651	0.771696	0.863146	0.853254	0.840941	0.883576
0.652	0.988202	0.979101	0.935545	0.942357	0.973701			0.652	0.782147	0.856447	0.842753	0.875998	0.91944
0.653	0.976595	0.977861	0.943683	0.937189	0.978451			0.653	0.768792	0.857642	0.840739	0.875895	0.885398
0.654	0.986651	0.96899	0.930766	0.946273	0.948204			0.654	0.763171	0.850802	0.843603	0.839104	0.897202
0.655	0.991965	0.965461	0.932327	0.935355	0.983042			0.655	0.756619	0.84255	0.849513	0.873449	0.908439
0.656	0.96954	0.957515	0.945577	0.926474	0.963877			0.656	0.750551	0.841372	0.84159	0.864113	0.894551
0.657	0.956642	0.962447	0.924048	0.932383	0.966289			0.657	0.741738	0.831676	0.858799	0.857814	0.894403
0.658	0.979817	0.965499	0.951593	0.94211	0.970461			0.658	0.758955	0.854853	0.846953	0.863813	0.876061
0.659	0.947996	0.992236	0.921058	0.926024	0.959658			0.659	0.752189	0.860921	0.848177	0.855133	0.896278
0.66	0.977415	0.95495	0.945174	0.947499	0.986329			0.66	0.759048	0.850586	0.846727	0.873064	0.884953
0.661	0.976655	0.963973	0.938474	0.932427	0.956892			0.661	0.783235	0.839271	0.855102	0.876326	0.922422
0.662	0.975444	0.962428	0.938228	0.932197	0.955067			0.662	0.757354	0.858016	0.859815	0.861019	0.896722
0.663	0.951839	0.939087	0.942938	0.9445	0.943976			0.663	0.73581	0.859385	0.833258	0.863457	0.899407
0.664	0.98395	0.974713	0.90743	0.934729	0.942914			0.664	0.765609	0.853965	0.819693	0.869043	0.874405
0.665	0.961115	0.968294	0.925855	0.941616	0.954816			0.665	0.735494	0.852296	0.865204	0.877611	0.89939
0.666	0.960885	0.953862	0.936983	0.942922	0.952692			0.666	0.750654	0.862839	0.862071	0.865978	0.900968
0.667	0.976114	0.967607	0.954539	0.941396	0.952469			0.667	0.737792	0.863304	0.864701	0.862932	0.907436
0.668	0.948236	0.971594	0.928477	0.921376	0.942467			0.668	0.774422	0.86977	0.840036	0.856436	0.901255
0.669	0.977736	0.938238	0.935554	0.928246	0.946267			0.669	0.761514	0.862996	0.851032	0.864272	0.882312
0.67	0.961775	0.936435	0.925372	0.936563	0.954871			0.67	0.74467	0.844443	0.867808	0.882794	0.898405
0.671	0.973083	0.955512	0.941377	0.93173	0.959034			0.671	0.76653	0.860813	0.85006	0.865228	0.901334
0.672	0.988382	0.971909	0.93202	0.921949	0.975992			0.672	0.76372	0.850196	0.859632	0.850127	0.893043
0.673	0.959284	0.967092	0.94463	0.960657	0.963122			0.673	0.745517	0.84788	0.851101	0.864703	0.893165
0.674	0.978896	0.96341	0.933265	0.942631	0.975489			0.674	0.734982	0.848976	0.865976	0.854214	0.895415
0.675	0.9843	0.950781	0.932502	0.949845	0.961837			0.675	0.756005	0.839379	0.835376	0.857392	0.900654
0.676	0.964197	0.960148	0.921523	0.936528	0.944227			0.676	0.77673	0.844842	0.852724	0.865594	0.917941
0.677	0.98388	0.971394	0.958819	0.942798	0.962089			0.677	0.783282	0.854953	0.859988	0.863963	0.910932
0.678	0.965718	0.955694	0.934905	0.933741	0.960217			0.678	0.777633	0.833851	0.868927	0.865341	0.887586
0.679	0.951959	1.00215	0.937939	0.941184	0.966708			0.679	0.741915	0.867205	0.844644	0.865584	0.890384
0.68	0.992505	0.986484	0.933449	0.936078	0.97494			0.68	0.73326	0.845912	0.849305	0.883141	0.902206
0.681	0.974603	0.968103	0.901318	0.94749	0.958336			0.681	0.748625	0.86391	0.84743	0.861582	0.911298
0.682	0.974423	0.94315	0.921531	0.937383	0.987568			0.682	0.744083	0.83957	0.851509	0.838917	0.896129
0.683	0.974864	0.947013	0.931169	0.927409	0.941238			0.683	0.767861	0.845348	0.849626	0.853558	0.897733
0.684	0.988693	0.95907	0.958345	0.966081	0.961856			0.684	0.757001	0.840791	0.845877	0.88585	0.914131
0.685	1.00258	0.946928	0.916875	0.942825	0.948846			0.685	0.759048	0.831917	0.853575	0.861319	0.897559
0.686	0.946875	0.954492	0.935299	0.933829	0.941769			0.686	0.737774	0.848179	0.841208	0.865687	0.904307
0.687	1.00289	0.948225	0.936966	0.932444	0.96667			0.687	0.755586	0.842467	0.866393	0.848468	0.86948
0.688	0.966158	0.982678	0.94584	0.948081	0.984355			0.688	0.751733	0.857999	0.836252	0.881472	0.896217
0.689	0.967669	0.972109	0.925469	0.939394	0.962144			0.689	0.770467	0.838118	0.835246	0.861151	0.908587
0.69	0.995657	0.966358	0.939325	0.943689	0.982092			0.69	0.755698	0.841231	0.840626	0.850699	0.874178
0.691	0.950418	0.963725	0.959389	0.929807	0.963998			0.691	0.740342	0.848893	0.841182	0.862594	0.913007
0.692	0.998729	0.94729	0.929696	0.942057	0.947151			0.692	0.739933	0.860514	0.856369	0.867159	0.911542
0.693	0.986962	0.938105	0.92589	0.932709	0.975638			0.693	0.764902	0.856853	0.839828	0.858207	0.913582
0.694	0.981388	0.962409	0.928152	0.928405	0.960608			0.694	0.748495	0.852089	0.847699	0.845488	0.88756
0.695	0.978106	0.968876	0.928091	0.932938	0.977669			0.695	0.774869	0.842816	0.833397	0.87478	0.890341
0.696	0.957332	0.959585	0.919164	0.953822	0.962266			0.696	0.757233	0.840135	0.85768	0.874039	0.888876
0.697	0.949127	0.956552	0.933247	0.940893	0.969846			0.697	0.724233	0.85824	0.847231	0.858704	0.902171
0.698	0.964667	0.968761	0.916156	0.933503	0.964417			0.698	0.724335	0.856546	0.83344	0.862435	0.900096
0.699	0.978336	0.958879	0.919813	0.918801	0.933676			0.699	0.751947	0.833137	0.858652	0.869971	0.892215
0.7	0.963997	0.949207	0.927986	0.941096	0.933713			0.7	0.73112	0.842401	0.854521	0.867318	0.901996
0.701	0.974984	0.977832	0.920295	0.947896	0.954257			0.701	0.764613	0.839537	0.820969	0.835964	0.895711
0.702	0.967159	0.961903	0.90964	0.933388	0.972938			0.702	0.743069	0.845888	0.845695	0.848337	0.897202
0.703	0.970071	0.974227	0.921163	0.924242	0.982567			0.703	0.736852	0.826928	0.844237	0.861263	0.897742
0.704	0.963406	0.96404	0.937606	0.928361	0.958187			0.704	0.746726	0.848403	0.856647	0.871152	0.892581
0.705	0.940942	0.956657	0.943227	0.93218	0.969837			0.705	0.751752	0.846701	0.848125	0.860054	0.887848
0.706	0.978406	0.965032	0.936659	0.941052	0.959779			0.706	0.742883	0.845821	0.843672	0.882428	0.903173
0.707	0.974263	0.961283	0.950023	0.93046	0.959286			0.707	0.74507	0.853093	0.836079	0.839676	0.901499
0.708	0.973743	0.958708	0.91926	0.923219	0.945577			0.708	0.726336	0.861843	0.828077	0.844925	0.889251
0.709	0.98414	0.949827	0.929468	0.946458	0.983992			0.709	0.740035	0.854264	0.856985	0.839357	0.880307
0.71	0.975094	0.959309	0.93836	0.939905	0.940325			0.71	0.744716	0.837794	0.862574	0.852696	0.878973
0.711	0.955631	0.960186	0.943893	0.932462	0.947608			0.711	0.754935	0.846095	0.847691	0.87613	0.896094
0.712	0.971852	0.924569	0.930362	0.96422	0.957153			0.712	0.756396	0.848204	0.854963	0.86475	0.885337
0.713	0.96852	0.960434	0.923882	0.928158	0.966009			0.713	0.752161	0.823018	0.846588	0.847044	0.897158
0.714	0.970081	0.961073	0.937878	0.946696	0.971047			0.714	0.763236	0.846593	0.843889	0.881144	0.895458
0.715	0.978956	0.963277	0.928679	0.936492	0.966028			0.715	0.765721	0.844825	0.855675	0.852874	0.880438
0.716	0.947396	0.967073	0.92696	0.935928	0.945754			0.716	0.735112	0.82296	0.844384	0.865022	0.88056
0.717	0.959864	0.961417	0.942297	0.948196	0.951128			0.717	0.725964	0.848179	0.859554	0.876748	0.898291
0.718	0.959244	0.970841	0.932546	0.949695	0.958429			0.718	0.753418	0.841679	0.840869	0.869081	0.910296
0.719	0.980207	0.963811	0.937711	0.95197	0.938379			0.719	0.747815	0.862673	0.843048	0.832655	0.919022
0.72	0.973243	0.955522	0.919751	0.943883	0.948725			0.72	0.746689	0.856289	0.852056	0.858676	0.874928
0.721	0.974423	0.946336	0.906483	0.931845	0.956948			0.721	0.7601	0.848942	0.827712	0.873449	0.882582
0.722	0.935988	0.966691	0.918646	0.920609	0.965339			0.722	0.754451	0.865213	0.843004	0.865491	0.869514
0.723	0.980898	0.957935	0.938106	0.946379	0.975424			0.723	0.742715	0.837993	0.857489	0.863335	0.890001
0.724	0.981888	0.949417	0.925381	0.925548	0.95624			0.724	0.735968	0.846128	0.842753	0.834005	0.872888
0.725	0.977185	0.925247	0.946296	0.924057	0.953512			0.725	0.739393	0.850138	0.859884	0.853493	0.899948
0.726	0.956732	0.934776	0.932607	0.95623	0.972332			0.726	0.74038	0.849698	0.860136	0.834239	0.877038
0.727	0.945004	0.95039	0.93743	0.950868	0.966419			0.727	0.730729	0.860738	0.867235	0.852152	0.887037
0.728	0.986501	0.976764	0.936887	0.941466	0.936609			0.728	0.770793	0.838242	0.853254	0.845647	0.917191
0.729	0.959974	0.951134	0.919409	0.934032	0.959425			0.729	0.733865	0.841006	0.858174	0.857664	0.883062
0.73	0.992215	0.952698	0.93252	0.932647	0.951584			0.73	0.738193	0.847988	0.849452	0.849424	0.894595
0.731	0.974473	0.960062	0.922347	0.929269	0.946863			0.731	0.765516	0.843264	0.861316	0.86146	0.889103
0.732	0.993826	0.968609	0.936711	0.929657	0.958727			0.732	0.763953	0.860357	0.85512	0.864141	0.90483
0.733	0.949607	0.94709	0.931169	0.926447	0.957051			0.733	0.757373	0.872535	0.84159	0.858451	0.871476
0.734	0.955501	0.96444	0.942631	0.938521	0.950643			0.734	0.744549	0.832274	0.836539	0.849021	0.87634
0.735	1.00245	0.966787	0.94392	0.953055	0.951659			0.735	0.747732	0.823209	0.841694	0.858957	0.875224
0.736	0.978146	0.973779	0.932835	0.957676	0.976374			0.736	0.758257	0.832033	0.841121	0.864197	0.893165
0.737	0.970501	0.930188	0.93829	0.919515	0.955402			0.737	0.738444	0.844584	0.856092	0.838317	0.90129
0.738	0.971151	0.960997	0.928643	0.917487	0.960515			0.738	0.760612	0.848942	0.865456	0.872868	0.881309
0.739	0.961135	0.967121	0.932397	0.914162	0.982474			0.739	0.740249	0.844709	0.849964	0.852386	0.889992
0.74	0.970071	0.971337	0.913551	0.939544	0.937839			0.74	0.715327	0.839354	0.837198	0.878417	0.864266
0.741	0.96951	0.938744	0.908991	0.946529	0.948809			0.741	0.753446	0.834357	0.852125	0.849143	0.900584
0.742	0.956382	0.965156	0.917699	0.928537	0.968654			0.742	0.748997	0.840417	0.830828	0.846575	0.888589
0.743	0.955101	0.962218	0.941824	0.952455	0.962144			0.743	0.754153	0.855824	0.84592	0.843772	0.875922
0.744	0.978766	0.948969	0.931765	0.942198	0.957311			0.744	0.742017	0.853085	0.838569	0.855864	0.875399
0.745	0.955991	0.944066	0.927021	0.943812	0.95543			0.745	0.74266	0.817298	0.827634	0.869756	0.914096
0.746	0.949577	0.97271	0.930906	0.933035	0.949479			0.746	0.741012	0.831062	0.851822	0.874695	0.90088
0.747	0.970911	0.940251	0.906439	0.918819	0.946127			0.747	0.748858	0.834631	0.835358	0.86505	0.889452
0.748	0.992655	0.955798	0.960319	0.938336	0.957628			0.748	0.745507	0.837686	0.863416	0.862482	0.90612
0.749	0.96964	0.962599	0.929152	0.927003	0.987652			0.749	0.738137	0.834839	0.851987	0.850943	0.9017
0.75	0.98454	0.954969	0.906913	0.944148	0.950904			0.75	0.749872	0.838267	0.865603	0.853118	0.876872
0.751	0.987072	0.955713	0.931309	0.929402	0.977883			0.751	0.747676	0.850428	0.827548	0.865491	0.876271
0.752	0.980747	0.961989	0.935422	0.919974	0.971625			0.752	0.747592	0.852778	0.845252	0.8435	0.894778
0.753	0.965618	0.96816	0.933432	0.926112	0.972565			0.753	0.721692	0.852446	0.833614	0.847194	0.872252
0.754	0.958683	0.9413	0.921365	0.933988	0.958513			0.754	0.732841	0.838408	0.82609	0.849584	0.889783
0.755	0.964507	0.956676	0.933589	0.93741	0.963076			0.755	0.743721	0.846759	0.838066	0.868856	0.901151
0.756	0.952889	0.95803	0.909535	0.928873	0.95449			0.756	0.740026	0.843995	0.839255	0.871621	0.91516
0.757	0.958663	0.963372	0.933686	0.934067	0.967406			0.757	0.740631	0.84407	0.835896	0.853474	0.872714
0.758	0.96849	0.966215	0.933993	0.92314	0.942225			0.758	0.737616	0.840342	0.832668	0.846134	0.893131
0.759	0.976185	0.975038	0.935001	0.925177	0.945512			0.759	0.737457	0.851009	0.852577	0.863541	0.894273
0.76	0.937589	0.955426	0.922356	0.943063	0.940446			0.76	0.731287	0.848469	0.847795	0.865228	0.892494
0.761	0.980277	0.960062	0.921593	0.91978	0.976393			0.761	0.747285	0.823673	0.844705	0.846369	0.872888
0.762	0.963176	0.955522	0.953136	0.948257	0.961167			0.762	0.744847	0.82315	0.868736	0.848853	0.863752
0.763	0.958203	0.975562	0.915165	0.956883	0.960431			0.763	0.757112	0.834606	0.838153	0.849012	0.876523
0.764	0.968029	0.968742	0.925074	0.937983	0.942188			0.764	0.728449	0.817904	0.83955	0.848628	0.895554
0.765	0.986141	0.973969	0.912674	0.936731	0.956361			0.765	0.740854	0.835445	0.856968	0.848243	0.888946
0.766	0.950518	0.965327	0.939412	0.945373	0.942653			0.766	0.730282	0.850105	0.846285	0.875895	0.886427
0.767	0.95323	0.947738	0.944209	0.931827	0.966652			0.767	0.71622	0.849017	0.841329	0.863653	0.903452
0.768	0.952909	0.962151	0.919795	0.926527	0.972873			0.768	0.758471	0.823756	0.850737	0.841391	0.865391
0.769	0.985911	0.973874	0.945411	0.948257	0.946742			0.769	0.748969	0.83063	0.821985	0.877226	0.893244
0.77	0.971842	0.935138	0.942438	0.926447	0.963951			0.77	0.727248	0.859817	0.833788	0.871977	0.883131
0.771	0.963776	0.925657	0.944034	0.906392	0.947561			0.771	0.729203	0.831194	0.861038	0.860166	0.865339
0.772	0.982238	0.965957	0.938193	0.941017	0.970507			0.772	0.735289	0.838964	0.846094	0.849443	0.90109
0.773	0.967419	0.956218	0.931871	0.926059	0.972128			0.773	0.72991	0.84236	0.855501	0.851805	0.892564
0.774	0.936629	0.955703	0.955434	0.930381	0.964016			0.774	0.701153	0.837387	0.823434	0.839714	0.893575
0.775	0.961485	0.930044	0.934563	0.924692	0.971327			0.775	0.752087	0.844526	0.853375	0.851168	0.885372
0.776	0.982168	0.940136	0.937001	0.938353	0.955803			0.776	0.733977	0.839761	0.854026	0.843697	0.892642
0.777	0.977085	0.949474	0.947068	0.927461	0.945577			0.777	0.751007	0.817107	0.841268	0.857345	0.892023
0.778	0.972622	0.986369	0.92888	0.944156	0.956529			0.778	0.730515	0.84969	0.837033	0.860195	0.904899
0.779	0.964627	0.97106	0.947164	0.932409	0.978544			0.779	0.74198	0.839379	0.826853	0.877114	0.919135
0.78	0.95453	0.967397	0.918629	0.943107	0.956753			0.78	0.756526	0.839039	0.822905	0.873524	0.889469
0.781	0.970221	0.96239	0.963169	0.94891	0.96736			0.781	0.744781	0.830356	0.843429	0.845638	0.893967
0.782	0.990244	0.956018	0.929047	0.942922	0.990296			0.782	0.736713	0.844808	0.82241	0.853324	0.874117
0.783	0.970731	0.970965	0.935054	0.934649	0.939748			0.783	0.75768	0.853533	0.848706	0.84695	0.879548
0.784	0.990074	0.947862	0.934256	0.932286	0.953856			0.784	0.745554	0.83879	0.831505	0.88016	0.861921
0.785	0.967609	0.970593	0.934949	0.911357	0.952543			0.785	0.716769	0.840234	0.839385	0.851796	0.896635
0.786	0.95339	0.958984	0.912955	0.941996	0.969399			0.786	0.715699	0.816842	0.860778	0.873936	0.875826
0.787	0.948326	0.956714	0.909421	0.949245	0.971848			0.787	0.751035	0.822171	0.85998	0.855292	0.867431
0.788	0.96926	0.972892	0.912674	0.907371	0.958121			0.788	0.742436	0.842052	0.855545	0.834108	0.879008
0.789	0.965668	0.970688	0.949313	0.922778	0.943352			0.789	0.728747	0.844767	0.823642	0.813899	0.907462
0.79	0.966008	0.955856	0.930064	0.932612	0.968859			0.79	0.738183	0.849092	0.845313	0.851459	0.887665
0.791	0.952339	0.95121	0.918234	0.934684	0.95232			0.791	0.732469	0.844468	0.838561	0.824604	0.896835
0.792	0.956822	0.955226	0.925583	0.948628	0.985715			0.792	0.726932	0.82452	0.840401	0.846387	0.904542
0.793	0.961915	0.953233	0.91285	0.934896	0.955439			0.793	0.712749	0.823018	0.845721	0.866344	0.892538
0.794	0.979066	0.965003	0.93822	0.932956	0.977277			0.794	0.728021	0.828571	0.847127	0.851271	0.884221
0.795	0.930605	0.94585	0.916822	0.944818	0.962862			0.795	0.733698	0.814849	0.840106	0.85593	0.877997
0.796	0.956892	0.963343	0.951795	0.939006	0.964566			0.796	0.733949	0.819266	0.84336	0.86251	0.881126
0.797	0.971191	0.962857	0.931485	0.942375	0.948185			0.797	0.707695	0.834639	0.829804	0.853633	0.882661
0.798	0.989883	0.956934	0.937448	0.925186	0.968626			0.798	0.73367	0.836673	0.851275	0.838851	0.884796
0.799	0.978286	0.948616	0.907632	0.925592	0.965907			0.799	0.710646	0.850926	0.845964	0.845038	0.867457
0.8	0.994066	0.950724	0.912245	0.926209	0.952469			0.8	0.754544	0.85335	0.828242	0.884416	0.894804
0.801	0.947766	0.972787	0.922093	0.938653	0.953931			0.801	0.749677	0.840957	0.835115	0.836264	0.871886
0.802	0.956552	0.956085	0.915016	0.927285	0.938593			0.802	0.726513	0.809437	0.854243	0.853164	0.899799
0.803	0.946135	0.957754	0.931669	0.920468	0.995865			0.803	0.721171	0.852827	0.852837	0.830303	0.887351
0.804	0.976375	0.940317	0.915893	0.919286	0.948129			0.804	0.718454	0.863104	0.846857	0.857336	0.872818
0.805	0.98395	0.937112	0.920909	0.912971	0.936935			0.805	0.731343	0.827376	0.828719	0.864441	0.875582
0.806	0.957562	0.960348	0.926004	0.909056	0.957665			0.806	0.73917	0.835113	0.844358	0.861123	0.898849
0.807	0.983449	0.986064	0.938649	0.912169	0.941312			0.807	0.73769	0.839479	0.849574	0.85443	0.884291
0.808	0.959304	0.936054	0.927354	0.939041	0.989272			0.808	0.732516	0.837429	0.840453	0.844747	0.908351
0.809	0.963877	0.984643	0.920146	0.942913	0.96993			0.809	0.742101	0.811346	0.814833	0.851355	0.886941
0.81	0.966768	0.952355	0.923785	0.933503	0.979866			0.81	0.699329	0.84441	0.833024	0.845834	0.900148
0.811	0.972202	0.957582	0.925092	0.944721	0.961604			0.811	0.731883	0.830954	0.829231	0.875295	0.895066
0.812	0.978916	0.937475	0.944007	0.950162	0.980853			0.812	0.712916	0.843505	0.84021	0.864291	0.890681
0.813	0.958923	0.954196	0.942806	0.927647	0.937969			0.813	0.726085	0.839147	0.846805	0.848553	0.874867
0.814	0.945935	0.978939	0.904335	0.92299	0.959891			0.814	0.736164	0.839421	0.820987	0.848337	0.884134
0.815	0.972502	0.947052	0.89076	0.912495	0.943296			0.815	0.719831	0.822461	0.83331	0.857083	0.881911
0.816	0.956031	0.976917	0.932984	0.940928	0.930622			0.816	0.728011	0.833162	0.849062	0.854749	0.880455
0.817	0.991244	0.945821	0.910026	0.936739	0.948567			0.817	0.730254	0.83073	0.841147	0.865931	0.869785
0.818	0.944894	0.947013	0.912578	0.903896	0.969036			0.818	0.748969	0.838823	0.829526	0.857176	0.895327
0.819	0.95362	0.952288	0.909702	0.941528	0.97264			0.819	0.738835	0.834822	0.846319	0.845328	0.889068
0.82	0.961315	0.974828	0.92838	0.938909	0.956957			0.82	0.728551	0.834033	0.833848	0.871996	0.866176
0.821	0.970371	0.964994	0.922838	0.946538	0.956408			0.821	0.742092	0.831485	0.838292	0.848862	0.877944
0.822	0.973613	0.953156	0.934563	0.924216	0.965376			0.822	0.723693	0.830655	0.83935	0.866053	0.897376
0.823	0.962095	0.974942	0.897933	0.933123	0.946229			0.823	0.740584	0.845207	0.828971	0.839498	0.875469
0.824	0.946025	0.978243	0.913078	0.929896	0.975182			0.824	0.721283	0.840367	0.856621	0.834586	0.891788
0.825	0.939671	0.964231	0.930564	0.927285	0.961176			0.825	0.700334	0.828629	0.817793	0.857439	0.88987
0.826	0.985661	0.967855	0.91983	0.942587	0.946974			0.826	0.755893	0.834166	0.84014	0.851824	0.87342
0.827	0.978406	0.961188	0.911122	0.930883	0.965143			0.827	0.727639	0.831252	0.850147	0.829047	0.872278
0.828	0.964847	0.933736	0.925828	0.918572	0.965804			0.828	0.74655	0.838217	0.824814	0.870205	0.874614
0.829	0.963937	0.955913	0.907316	0.918854	0.980704			0.829	0.744093	0.86596	0.816691	0.856858	0.884352
0.83	0.965758	0.93902	0.91791	0.939112	0.973329			0.83	0.716658	0.816327	0.833388	0.850877	0.864737
0.831	0.982939	0.95536	0.908702	0.933467	0.961139			0.831	0.708673	0.859925	0.834057	0.839414	0.887656
0.832	0.949577	0.95247	0.924978	0.935628	0.963746			0.832	0.739105	0.829883	0.813584	0.860598	0.881013
0.833	0.960104	0.96073	0.93195	0.94547	0.985016			0.833	0.728114	0.824271	0.838214	0.870384	0.877038
0.834	0.979937	0.947042	0.921707	0.932612	0.931069			0.834	0.730617	0.841571	0.838378	0.847165	0.894787
0.835	0.965508	0.944181	0.926276	0.917399	0.963728			0.835	0.732627	0.832846	0.844861	0.85024	0.902397
0.836	0.964807	0.9632	0.918874	0.926191	0.973282			0.836	0.731725	0.814526	0.851544	0.880751	0.888545
0.837	0.965418	0.969324	0.928959	0.919462	0.964463			0.837	0.738704	0.824188	0.825578	0.859042	0.87655
0.838	0.96867	0.971671	0.953215	0.940338	0.970451			0.838	0.726811	0.828571	0.844254	0.844297	0.873577
0.839	0.947616	0.955531	0.911131	0.935875	0.958354			0.839	0.716471	0.821806	0.83804	0.859829	0.867518
0.84	0.96889	0.942435	0.936983	0.94099	0.94067			0.84	0.694629	0.823839	0.834109	0.870684	0.893287
0.841	0.961825	0.970812	0.92546	0.950462	0.955253			0.841	0.740687	0.824786	0.845478	0.843154	0.897672
0.842	0.960064	0.939001	0.917568	0.937745	0.970079			0.842	0.709538	0.816244	0.842405	0.83543	0.877735
0.843	0.952269	0.960577	0.943052	0.923334	0.954722			0.843	0.731929	0.852354	0.838552	0.852311	0.885808
0.844	0.974734	0.939306	0.910736	0.956459	0.96329			0.844	0.72226	0.82892	0.819164	0.838879	0.867265
0.845	0.95356	0.952622	0.935115	0.943283	0.951444			0.845	0.749844	0.841754	0.819598	0.851177	0.883759
0.846	0.965678	0.952861	0.920567	0.944809	0.934337			0.846	0.73367	0.84172	0.842232	0.8625	0.867431
0.847	0.955431	0.937093	0.939158	0.935425	0.952506			0.847	0.730152	0.829509	0.84067	0.852658	0.904873
0.848	0.93848	0.956418	0.910149	0.899654	0.99241			0.848	0.732627	0.839977	0.837476	0.84516	0.874231
0.849	0.962666	0.93841	0.917042	0.929314	0.970023			0.849	0.715168	0.809885	0.850485	0.842094	0.88069
0.85	0.946645	0.946145	0.927249	0.922937	0.960738			0.85	0.690776	0.839919	0.836461	0.859576	0.889242
0.851	0.957863	0.984271	0.909763	0.921235	0.964929			0.851	0.719152	0.832091	0.846779	0.848356	0.881571
0.852	0.957182	0.938019	0.930213	0.928687	0.940241			0.852	0.707723	0.819423	0.859415	0.846444	0.883654
0.853	0.968409	0.95493	0.914937	0.923484	0.936367			0.853	0.713866	0.853998	0.826159	0.851234	0.882129
0.854	0.993396	0.962886	0.926872	0.922364	0.960142			0.854	0.72065	0.826936	0.823095	0.866212	0.869436
0.855	0.96884	0.933812	0.919813	0.931307	0.964091			0.855	0.729956	0.832772	0.828971	0.875567	0.883846
0.856	0.966048	0.947109	0.934142	0.932947	0.972724			0.856	0.71757	0.835569	0.800366	0.849228	0.882077
0.857	0.949637	0.962008	0.94285	0.907318	0.952106			0.857	0.710031	0.836598	0.836834	0.821117	0.884029
0.858	0.956081	0.931752	0.928985	0.942745	0.958429			0.858	0.719198	0.820013	0.837242	0.866381	0.863552
0.859	0.951639	0.952422	0.918032	0.929314	0.967108			0.859	0.731101	0.819232	0.865317	0.850268	0.888318
0.86	0.954971	0.956705	0.905685	0.931254	0.959174			0.86	0.723907	0.82061	0.858851	0.835805	0.883454
0.861	0.945915	0.946031	0.94292	0.932047	0.948939			0.861	0.724708	0.809254	0.817611	0.847128	0.859908
0.862	0.956452	0.974217	0.93565	0.946449	0.955896			0.862	0.719189	0.836789	0.82773	0.817723	0.871633
0.863	0.964797	0.962046	0.91278	0.902256	0.980192			0.863	0.732748	0.839139	0.81794	0.836527	0.874196
0.864	0.948967	0.931666	0.932616	0.938318	0.942057			0.864	0.723814	0.84431	0.827079	0.848356	0.880368
0.865	0.964627	0.921746	0.911096	0.938415	0.944404			0.865	0.713735	0.848984	0.833874	0.845028	0.873071
0.866	0.954971	0.957906	0.920076	0.938433	0.981636			0.866	0.701097	0.854596	0.856109	0.852321	0.865888
0.867	0.948547	0.965213	0.948883	0.939509	0.924112			0.867	0.727816	0.822818	0.83922	0.84141	0.88885
0.868	0.943343	0.955579	0.913779	0.933564	0.969082			0.868	0.71635	0.830132	0.82832	0.846528	0.884343
0.869	0.973153	0.950495	0.929161	0.937595	0.954061			0.869	0.73272	0.840425	0.803959	0.862238	0.875495
0.87	0.972092	0.96569	0.928915	0.958955	0.948511			0.87	0.697859	0.829069	0.818253	0.850531	0.888868
0.871	0.963536	0.959509	0.921049	0.923263	0.956753			0.871	0.70348	0.833295	0.814018	0.84037	0.866498
0.872	0.952729	0.934604	0.93323	0.92396	0.961511			0.872	0.727192	0.823889	0.840418	0.87118	0.870011
0.873	0.943363	0.951706	0.935755	0.920186	0.941825			0.873	0.716053	0.836084	0.82655	0.832871	0.899154
0.874	0.944864	0.95555	0.936238	0.92538	0.941368			0.874	0.710487	0.837362	0.819511	0.850137	0.869296
0.875	0.962065	0.960816	0.926311	0.914144	0.952161			0.875	0.713019	0.832597	0.852507	0.854767	0.892573
0.876	0.967349	0.944133	0.891707	0.946361	0.982315			0.876	0.720641	0.828181	0.844966	0.847278	0.890454
0.877	0.955061	0.951077	0.927311	0.9277	0.971383			0.877	0.715476	0.835063	0.8274	0.847906	0.869
0.878	0.947066	0.963	0.93202	0.927082	0.9744			0.878	0.734349	0.827542	0.847777	0.812006	0.876637
0.879	0.973883	0.965032	0.912999	0.955075	0.957488			0.879	0.71153	0.848793	0.813054	0.842694	0.863124
0.88	0.981008	0.953309	0.926258	0.918589	0.950969			0.88	0.720334	0.838317	0.833484	0.856098	0.889609
0.881	0.945515	0.957563	0.932537	0.925786	0.956557			0.881	0.714312	0.829293	0.835185	0.859313	0.879679
0.882	0.975714	0.956972	0.92653	0.949563	0.957851			0.882	0.722325	0.837321	0.826124	0.839826	0.880237
0.883	0.958853	0.949408	0.924241	0.916367	0.954061			0.883	0.720054	0.820361	0.826159	0.876073	0.897341
0.884	0.944124	0.942912	0.921251	0.911578	0.948362			0.884	0.718407	0.816252	0.801017	0.853596	0.87179
0.885	0.95404	0.952842	0.931608	0.90917	0.940316			0.885	0.711688	0.806573	0.819746	0.84605	0.892442
0.886	0.991855	0.939802	0.913779	0.946846	0.942812			0.886	0.701674	0.80981	0.832607	0.830143	0.874745
0.887	0.973713	0.951735	0.917375	0.937163	0.93403			0.887	0.703815	0.834274	0.842102	0.833808	0.883314
0.888	0.978686	0.946975	0.933589	0.901797	0.963867			0.888	0.696593	0.825865	0.823312	0.846819	0.892852
0.889	0.951889	0.955732	0.907044	0.930566	0.963597			0.889	0.706988	0.81944	0.846207	0.846312	0.89259
0.89	0.933787	0.932086	0.943806	0.931421	0.967816			0.89	0.716025	0.842426	0.822983	0.859867	0.872025
0.891	0.951058	0.935443	0.933423	0.946088	0.967397			0.891	0.726978	0.822528	0.849348	0.853324	0.877491
0.892	0.968239	0.992207	0.934405	0.956415	0.954564			0.892	0.719515	0.816252	0.816968	0.845872	0.882678
0.893	0.932316	0.958679	0.91477	0.946088	0.956203			0.893	0.69676	0.813861	0.81249	0.851955	0.882312
0.894	0.940972	0.961627	0.918208	0.932638	0.937736			0.894	0.699189	0.833104	0.825716	0.844869	0.901238
0.895	0.943864	0.964431	0.935703	0.940726	0.961781			0.895	0.722921	0.82413	0.813271	0.848843	0.886235
0.896	0.994516	0.963553	0.907948	0.941131	0.959891			0.896	0.716322	0.830705	0.834109	0.85368	0.861477
0.897	0.962145	0.964707	0.915367	0.920891	0.960431			0.897	0.710497	0.828613	0.829431	0.83617	0.874431
0.898	0.951939	0.97789	0.916691	0.921994	0.966177			0.898	0.697821	0.811894	0.814104	0.860963	0.874152
0.899	0.960074	0.952326	0.91591	0.927902	0.949088			0.899	0.717839	0.833685	0.824996	0.823882	0.864005
0.9	0.944544	0.957162	0.914709	0.945082	0.963122			0.9	0.734507	0.838151	0.830403	0.861901	0.881798
0.901	0.926182	0.937208	0.93009	0.924578	0.957656			0.901	0.713298	0.818427	0.826489	0.853689	0.895685
0.902	0.93911	0.967063	0.933809	0.959484	0.939403			0.902	0.714191	0.826969	0.84697	0.852199	0.873647
0.903	0.958133	0.932801	0.916577	0.942798	0.951612			0.903	0.712972	0.821117	0.813002	0.853708	0.885468
0.904	0.975944	0.953614	0.905957	0.927197	0.971634			0.904	0.710506	0.808399	0.811492	0.850043	0.880446
0.905	0.983399	0.95991	0.919593	0.943962	0.938276			0.905	0.72521	0.823424	0.825031	0.849546	0.873019
0.906	0.943763	0.934852	0.911008	0.939412	0.947282			0.906	0.725201	0.828164	0.843065	0.857898	0.869349
0.907	0.941872	0.951582	0.910894	0.925345	0.934747			0.907	0.699943	0.841803	0.852394	0.832852	0.879601
0.908	0.955061	0.943446	0.932511	0.931959	0.970526			0.908	0.711306	0.838732	0.822167	0.838926	0.882016
0.909	0.965478	0.960291	0.925399	0.926253	0.946024			0.909	0.728784	0.818037	0.80947	0.839235	0.869314
0.91	0.952229	0.941901	0.939263	0.924895	0.938872			0.91	0.717197	0.833361	0.829509	0.828653	0.846639
0.911	0.955751	0.932572	0.917103	0.920697	0.971243			0.911	0.740035	0.833959	0.835124	0.830331	0.877814
0.912	0.964817	0.937914	0.924206	0.936157	0.960645			0.912	0.701469	0.829144	0.837623	0.851384	0.881126
0.913	0.957753	0.953719	0.927074	0.924516	0.94974			0.913	0.715504	0.807378	0.82326	0.838814	0.854398
0.914	0.975734	0.953671	0.936115	0.939914	0.963579			0.914	0.707212	0.841422	0.835896	0.863438	0.860718
0.915	0.96849	0.954434	0.934308	0.937639	0.954704			0.915	0.71743	0.842102	0.847352	0.864225	0.883332
0.916	0.959454	0.91919	0.929319	0.908165	0.945922			0.916	0.721488	0.845473	0.818244	0.843182	0.874126
0.917	0.95395	0.953929	0.919059	0.936051	0.940782			0.917	0.702679	0.819432	0.822844	0.835102	0.898056
0.918	0.978036	0.967674	0.915621	0.932585	0.940521			0.918	0.725675	0.828579	0.822974	0.845375	0.90204
0.919	0.980667	0.963773	0.913271	0.947825	0.955896			0.919	0.715913	0.832664	0.832599	0.828044	0.884465
0.92	0.960334	0.934308	0.928389	0.925327	0.929774			0.92	0.704978	0.816808	0.84474	0.848047	0.865182
0.921	0.959304	0.971556	0.938939	0.944394	0.982567			0.921	0.699273	0.822063	0.844358	0.85548	0.882146
0.922	0.972172	0.952975	0.913183	0.918087	0.962564			0.922	0.702316	0.816676	0.821698	0.845366	0.872234
0.923	0.933197	0.949942	0.925846	0.91433	0.945512			0.923	0.721218	0.83757	0.831609	0.801085	0.856211
0.924	0.980547	0.973664	0.923557	0.920441	0.924149			0.924	0.710329	0.850578	0.84152	0.840538	0.868721
0.925	0.975404	0.950629	0.936466	0.944086	0.948129			0.925	0.713558	0.816667	0.836955	0.825513	0.885991
0.926	0.961735	0.956314	0.936536	0.915529	0.937615			0.926	0.714526	0.835768	0.822445	0.848234	0.873237
0.927	0.960324	0.930808	0.904913	0.924807	0.958811			0.927	0.710106	0.806025	0.852282	0.839667	0.894682
0.928	0.945214	0.956838	0.913893	0.956256	0.979829			0.928	0.712014	0.814434	0.831548	0.845891	0.873132
0.929	0.961685	0.961569	0.906615	0.92389	0.93647			0.929	0.716369	0.811769	0.833909	0.829496	0.856883
0.93	0.980888	0.935987	0.9286	0.943715	0.961642			0.93	0.686523	0.826554	0.84165	0.823226	0.878921
0.931	0.963196	0.940279	0.922584	0.92695	0.959025			0.931	0.723284	0.811321	0.826437	0.827153	0.84718
0.932	0.934467	0.937103	0.940017	0.937066	0.96667			0.932	0.685006	0.802256	0.842058	0.828109	0.868782
0.933	0.976795	0.947929	0.921286	0.944209	0.941676			0.933	0.718463	0.810541	0.824423	0.854692	0.858129
0.934	0.975834	0.959328	0.911385	0.924639	0.973962			0.934	0.713884	0.817481	0.813289	0.840998	0.879147
0.935	0.957562	0.959576	0.916761	0.928776	0.948325			0.935	0.714554	0.844136	0.825699	0.84246	0.88103
0.936	0.965518	0.946336	0.936817	0.941308	0.952357			0.936	0.715718	0.830738	0.818314	0.836049	0.879784
0.937	0.96966	0.961817	0.929634	0.946326	0.955318			0.937	0.703526	0.83576	0.830455	0.852274	0.87607
0.938	0.958913	0.96052	0.918322	0.945453	0.949079			0.938	0.690665	0.818137	0.8295	0.854167	0.894464
0.939	1.01029	0.955522	0.905247	0.902133	0.951398			0.939	0.712311	0.831086	0.826957	0.850587	0.853953
0.94	0.95436	0.959461	0.92425	0.906524	0.95354			0.94	0.710152	0.836657	0.842293	0.876579	0.859977
0.941	0.958953	0.93986	0.924022	0.95466	0.949768			0.941	0.721171	0.823142	0.82858	0.842694	0.871075
0.942	0.962005	0.950228	0.892926	0.944703	0.975881			0.942	0.704308	0.849864	0.822262	0.826413	0.890358
0.943	0.955041	0.944333	0.939833	0.935787	0.94636			0.943	0.699273	0.844825	0.818895	0.843613	0.872661
0.944	0.95437	0.952861	0.925267	0.93412	0.942178			0.944	0.719636	0.813571	0.812117	0.836105	0.879548
0.945	0.959244	0.944343	0.942815	0.930522	0.961008			0.945	0.698501	0.836831	0.82852	0.844119	0.88287
0.946	0.952189	0.944448	0.921786	0.924877	0.967713			0.946	0.697486	0.80512	0.829049	0.865088	0.882294
0.947	0.970601	0.948521	0.934484	0.918598	0.939701			0.947	0.706039	0.830397	0.817958	0.854055	0.882294
0.948	0.949577	0.945535	0.914086	0.920071	0.976896			0.948	0.722911	0.824861	0.83627	0.841438	0.877866
0.949	0.966718	0.949646	0.926732	0.92135	0.928731			0.949	0.697207	0.833452	0.824736	0.84605	0.856499
0.95	0.967019	0.955169	0.922926	0.930883	0.928927			0.95	0.720762	0.820013	0.822115	0.848225	0.87192
0.951	0.964847	0.95204	0.924496	0.924939	0.955784			0.951	0.689018	0.816808	0.817342	0.867412	0.864136
0.952	0.959444	0.952822	0.931038	0.922082	0.952199			0.952	0.703805	0.827899	0.828841	0.850221	0.871851
0.953	0.929444	0.943952	0.912394	0.927382	0.960049			0.953	0.718751	0.814003	0.815172	0.844775	0.874823
0.954	0.943133	0.950285	0.916059	0.920865	0.947123			0.954	0.698035	0.805627	0.819685	0.857101	0.873865
0.955	0.941682	0.946832	0.909474	0.93427	0.93606			0.955	0.701684	0.824014	0.821212	0.849106	0.875643
0.956	0.989103	0.918093	0.906948	0.922796	0.962321			0.956	0.740547	0.805477	0.843395	0.843322	0.875111
0.957	0.948467	0.939469	0.920795	0.921473	0.95164			0.957	0.705499	0.807005	0.837945	0.835121	0.872452
0.958	0.933327	0.974876	0.935826	0.923766	0.98957			0.958	0.725015	0.831593	0.832356	0.839892	0.868067
0.959	0.93782	0.928499	0.940947	0.931227	0.966652			0.959	0.696211	0.824761	0.812152	0.851721	0.866803
0.96	0.935658	0.937551	0.935063	0.931607	0.970945			0.96	0.691903	0.811288	0.834681	0.830443	0.88382
0.961	0.977836	0.938419	0.917971	0.911604	0.96545			0.961	0.717616	0.803775	0.801954	0.860401	0.872278
0.962	0.959914	0.954625	0.912648	0.944192	0.924047			0.962	0.708533	0.841123	0.842423	0.853249	0.86642
0.963	0.962996	0.956256	0.930178	0.9392	0.964873			0.963	0.702754	0.819855	0.853523	0.840417	0.861372
0.964	0.955311	0.937647	0.925425	0.913368	0.9492			0.964	0.721823	0.834324	0.838708	0.83663	0.860962
0.965	0.93781	0.937685	0.93259	0.913844	0.955542			0.965	0.704252	0.809246	0.818097	0.853652	0.869593
0.966	0.957873	0.953805	0.931099	0.895201	0.959034			0.966	0.707426	0.818577	0.7945	0.859379	0.880699
0.967	0.976845	0.932801	0.920821	0.919824	0.965413			0.967	0.715718	0.81514	0.830672	0.842807	0.868564
0.968	0.947196	0.934375	0.88826	0.946679	0.955169			0.968	0.688562	0.824396	0.820761	0.843069	0.867597
0.969	0.953009	0.946012	0.921602	0.923281	0.964529			0.969	0.707677	0.808225	0.803551	0.815052	0.876471
0.97	0.961585	0.933116	0.931932	0.904143	0.957972			0.97	0.701925	0.855525	0.823894	0.847868	0.877439
0.971	0.963806	0.941777	0.919778	0.927303	0.962312			0.971	0.70602	0.816667	0.817385	0.837098	0.878328
0.972	0.934567	0.975686	0.891163	0.905766	0.953158			0.972	0.698491	0.825566	0.804436	0.84784	0.873237
0.973	0.95318	0.951907	0.919585	0.938371	0.966968			0.973	0.68805	0.807328	0.829969	0.841785	0.867797
0.974	0.966648	0.933717	0.932037	0.939121	0.943808			0.974	0.699264	0.826122	0.825187	0.849406	0.876776
0.975	0.976805	0.946479	0.915595	0.934446	0.949675			0.975	0.729165	0.84099	0.81039	0.850296	0.875704
0.976	0.955801	0.95101	0.922277	0.932471	0.95191			0.976	0.68335	0.818527	0.818843	0.822785	0.880542
0.977	0.96978	0.937551	0.932484	0.930292	0.96681			0.977	0.716592	0.819266	0.819234	0.837455	0.881283
0.978	0.950078	0.956027	0.929354	0.941184	0.93119			0.978	0.69556	0.822022	0.820396	0.847278	0.852088
0.979	0.949417	0.951525	0.926802	0.930583	0.958876			0.979	0.681805	0.827915	0.834187	0.847972	0.875538
0.98	0.957953	0.945249	0.917112	0.923607	0.947067			0.98	0.682708	0.810831	0.808689	0.83677	0.893052
0.981	0.941702	0.936264	0.937632	0.952297	0.933769			0.981	0.713642	0.814069	0.81696	0.864769	0.865966
0.982	0.944964	0.941653	0.930959	0.923519	0.92902			0.982	0.706244	0.837736	0.842345	0.824191	0.878677
0.983	0.944164	0.96156	0.90736	0.929896	0.966466			0.983	0.69637	0.822262	0.838326	0.85817	0.886374
0.984	0.945304	0.933574	0.895706	0.943707	0.965497			0.984	0.701469	0.823001	0.833223	0.856736	0.87974
0.985	0.979487	0.956046	0.922408	0.937471	0.954704			0.985	0.707091	0.832697	0.828858	0.842141	0.877299
0.986	0.970711	0.95865	0.896372	0.94973	0.95584			0.986	0.707174	0.813098	0.824857	0.843388	0.867989
0.987	0.977045	0.946212	0.921005	0.924278	0.944991			0.987	0.684523	0.829285	0.828311	0.850137	0.865347
0.988	0.963716	0.965079	0.903046	0.91926	0.959546			0.988	0.683099	0.818452	0.825066	0.809503	0.860474
0.989	0.946315	0.940804	0.934045	0.95003	0.952394			0.989	0.71019	0.83146	0.825751	0.863344	0.874832
0.99	0.943964	0.942483	0.908588	0.916834	0.937634			0.99	0.716043	0.820544	0.818114	0.840388	0.857833
0.991	0.931956	0.958402	0.925627	0.913933	0.933378			0.991	0.699441	0.846419	0.845	0.851608	0.870726
0.992	0.956292	0.954177	0.928328	0.939861	0.923823			0.992	0.720492	0.835752	0.812942	0.802773	0.86642
0.993	0.958583	0.944333	0.954873	0.931166	0.94581			0.993	0.715345	0.811678	0.855163	0.813065	0.8535
0.994	0.973563	0.947996	0.928565	0.915785	0.949805			0.994	0.723665	0.821772	0.832	0.834858	0.883184
0.995	0.957632	0.941405	0.929371	0.90529	0.963579			0.995	0.721869	0.816601	0.812256	0.82974	0.859376
0.996	0.963646	0.953595	0.921339	0.944412	0.952469			0.996	0.698584	0.804639	0.806797	0.852536	0.863159
0.997	0.962866	0.932133	0.919436	0.931368	0.973031			0.997	0.700008	0.813521	0.815632	0.846875	0.871764
0.998	0.925261	0.950686	0.904624	0.910308	0.940893			0.998	0.704382	0.828671	0.819051	0.824257	0.870308
0.999	0.927153	0.923482	0.908132	0.937612	0.955067			0.999	0.722763	0.814592	0.821733	0.83827	0.869907
1	0.957232	0.926	0.925232	0.943213	0.966996			1	0.700576	0.821689	0.828615	0.819054	0.862845
2	0.935598	0.928785	0.90408	0.913121	0.939766			2	0.649754	0.779129	0.788017	0.804301	0.839604
3	0.899575	0.894714	0.874642	0.883347	0.913607			3	0.576996	0.714604	0.727466	0.747825	0.783794
4	0.866213	0.864086	0.847974	0.859227	0.891555			4	0.525299	0.663086	0.677373	0.700189	0.736562
5	0.836654	0.837406	0.821955	0.835679	0.869224			5	0.483253	0.616856	0.633416	0.656331	0.694342
6	0.807225	0.808724	0.796664	0.809971	0.847451			6	0.445962	0.573673	0.591412	0.616831	0.654755
7	0.779247	0.783685	0.772645	0.787403	0.826088			7	0.411529	0.533388	0.552696	0.57855	0.617026
8	0.752219	0.757874	0.748976	0.765213	0.80683			8	0.379412	0.49741	0.517366	0.543006	0.582094
9	0.724851	0.733522	0.727702	0.744126	0.786184			9	0.349827	0.462727	0.482782	0.510301	0.549595
10	0.700055	0.710344	0.705585	0.723401	0.767633			10	0.323965	0.431357	0.45173	0.478835	0.517583
11	0.67707	0.687251	0.684881	0.703205	0.750498			11	0.298828	0.402743	0.422544	0.449805	0.488676
12	0.652614	0.665331	0.665334	0.682771	0.731296			12	0.277619	0.376154	0.395588	0.423044	0.460509
13	0.6302	0.643889	0.645366	0.664585	0.713025			13	0.257136	0.350403	0.370628	0.397285	0.435306
14	0.608375	0.622913	0.626213	0.646268	0.695694			14	0.237788	0.326629	0.34743	0.374161	0.410147
15	0.588372	0.603426	0.607412	0.627624	0.67936			15	0.221101	0.305734	0.32497	0.351683	0.388039
16	0.567139	0.5835	0.588987	0.610294	0.662122			16	0.203931	0.285513	0.304402	0.330837	0.366533
17	0.548507	0.565186	0.571922	0.593916	0.646794			17	0.188706	0.266187	0.284441	0.311415	0.345297
18	0.530415	0.546806	0.555252	0.576604	0.631381			18	0.175658	0.247526	0.267171	0.292724	0.325734
19	0.512863	0.53017	0.538598	0.561276	0.614945			19	0.162443	0.232094	0.250039	0.275908	0.307802
20	0.495542	0.512324	0.52334	0.545887	0.601516			20	0.150857	0.216679	0.234947	0.25897	0.290768
21	0.478001	0.496356	0.507309	0.529853	0.586793			21	0.139912	0.203704	0.220653	0.24326	0.275556
22	0.46115	0.481495	0.491963	0.51636	0.573001			22	0.129871	0.190314	0.205796	0.230466	0.260588
23	0.44621	0.465585	0.478318	0.501605	0.558883			23	0.120285	0.178078	0.194479	0.216893	0.245698
24	0.43142	0.450218	0.464541	0.487882	0.545725			24	0.112114	0.165908	0.182754	0.203779	0.232482
25	0.416451	0.436922	0.450422	0.475006	0.532436			25	0.103552	0.156196	0.170396	0.191528	0.219806
26	0.401741	0.42208	0.437856	0.461619	0.521279			26	0.096991	0.145255	0.15979	0.181489	0.20802
27	0.389063	0.408487	0.425079	0.449245	0.508158			27	0.090542	0.136555	0.149853	0.171347	0.196243
28	0.375744	0.395858	0.411451	0.436087	0.495381			28	0.082836	0.127681	0.141452	0.161299	0.18532
29	0.363276	0.384727	0.401217	0.423369	0.484085			29	0.077857	0.119164	0.132574	0.152825	0.176506
30	0.350718	0.371096	0.388361	0.413289	0.472072			30	0.074023	0.111876	0.125119	0.14423	0.166655
31	0.33846	0.35985	0.377654	0.401974	0.460366			31	0.067453	0.105226	0.116797	0.135653	0.158391
32	0.327883	0.348662	0.367025	0.390906	0.450485			32	0.063125	0.099133	0.111043	0.128604	0.149133
33	0.318477	0.338293	0.356406	0.379696	0.439943			33	0.058761	0.093165	0.104247	0.121611	0.140703
34	0.306629	0.327906	0.345277	0.369925	0.429569			34	0.054545	0.087603	0.098302	0.114019	0.133711
35	0.296883	0.317786	0.335438	0.359482	0.419614			35	0.051734	0.082199	0.091038	0.108704	0.127086
36	0.286416	0.307503	0.325774	0.349843	0.409445			36	0.047984	0.076579	0.087229	0.102311	0.120486
37	0.27757	0.298356	0.316636	0.339798	0.400132			37	0.045313	0.071806	0.081362	0.0974	0.114009
38	0.267874	0.288903	0.307858	0.330696	0.390093			38	0.042009	0.068693	0.076484	0.090988	0.10809
39	0.258398	0.278926	0.298878	0.321321	0.381293			39	0.039803	0.06377	0.072692	0.087483	0.102999
40	0.251183	0.271762	0.289372	0.313613	0.371682			40	0.037188	0.060383	0.069038	0.082327	0.09742
41	0.242458	0.262605	0.28134	0.304891	0.363329			41	0.034722	0.056515	0.063857	0.078297	0.091352
42	0.235943	0.254822	0.273912	0.296628	0.3556			42	0.032386	0.053335	0.060611	0.073872	0.087865
43	0.226717	0.246943	0.266221	0.288796	0.346278			43	0.029157	0.050339	0.056801	0.06972	0.082757
44	0.220393	0.239055	0.258811	0.280726	0.339163			44	0.028198	0.047882	0.053278	0.065464	0.078502
45	0.212748	0.231347	0.25212	0.272771	0.330949			45	0.026579	0.044727	0.051568	0.063205	0.07464
46	0.205013	0.2251	0.24457	0.266386	0.322335			46	0.02482	0.042444	0.048158	0.059887	0.070813
47	0.198859	0.217211	0.236624	0.259128	0.315472			47	0.023862	0.040029	0.045302	0.057009	0.066228
48	0.192545	0.211469	0.231126	0.251605	0.307435			48	0.021163	0.037463	0.043271	0.054057	0.06404
49	0.186311	0.20402	0.223883	0.2447	0.300963			49	0.020465	0.035944	0.040121	0.051835	0.061259
50	0.180367	0.196961	0.2177	0.238376	0.293578			50	0.01959	0.032898	0.037422	0.049483	0.057432
51	0.174844	0.191448	0.212246	0.232423	0.286221			51	0.017561	0.031163	0.03619	0.04698	0.054677
52	0.168119	0.185925	0.205274	0.226056	0.280922			52	0.016993	0.030416	0.034567	0.044308	0.051635
53	0.163927	0.179858	0.199547	0.219582	0.27377			53	0.016026	0.028158	0.032571	0.042068	0.049063
54	0.157482	0.174622	0.195066	0.213912	0.266991			54	0.014406	0.026224	0.031226	0.040615	0.047345
55	0.152469	0.169013	0.189077	0.2081	0.262018			55	0.014202	0.026099	0.029429	0.038872	0.044957
56	0.148416	0.1639	0.183657	0.203029	0.255201			56	0.013383	0.023293	0.027259	0.036613	0.042202
57	0.143303	0.158864	0.17851	0.197278	0.249185			57	0.013085	0.022463	0.026478	0.034701	0.040955
58	0.13787	0.153713	0.174037	0.192578	0.243383			58	0.011335	0.021401	0.025298	0.033004	0.038985
59	0.134207	0.148811	0.16832	0.187789	0.238541			59	0.010358	0.020961	0.023701	0.031879	0.036257
60	0.130185	0.145644	0.1639	0.182197	0.2326			60	0.009921	0.019724	0.021714	0.030239	0.035455
61	0.125632	0.141485	0.159375	0.176447	0.227273			61	0.009921	0.018429	0.020751	0.029048	0.032996
62	0.12248	0.136773	0.154525	0.172681	0.222793			62	0.008329	0.017532	0.019952	0.027558	0.032735
63	0.118517	0.13146	0.150667	0.167399	0.217625			63	0.008171	0.016329	0.018086	0.026124	0.031078
64	0.114935	0.128121	0.146466	0.162672	0.212065			64	0.00792	0.01632	0.018138	0.024746	0.029187
65	0.112103	0.124726	0.142932	0.15932	0.207344			65	0.007501	0.015357	0.016993	0.02393	0.028175
66	0.108531	0.120987	0.138451	0.154849	0.202278			66	0.006784	0.014544	0.017331	0.022337	0.026554
67	0.103607	0.118182	0.134838	0.151154	0.197975			67	0.006701	0.013622	0.015743	0.021512	0.025639
68	0.100866	0.11326	0.131287	0.147061	0.194204			68	0.005928	0.013431	0.014285	0.020875	0.023939
69	0.098164	0.110151	0.12734	0.142899	0.188607			69	0.004542	0.012269	0.014094	0.019066	0.023294
70	0.094461	0.107099	0.124385	0.139733	0.183848			70	0.004867	0.011771	0.01379	0.019666	0.021524
71	0.09176	0.104056	0.120798	0.135173	0.181064			71	0.004281	0.010725	0.012037	0.018981	0.021437
72	0.089368	0.101118	0.118089	0.132527	0.175681			72	0.004244	0.010551	0.011898	0.018288	0.021079
73	0.085766	0.097388	0.114695	0.129308	0.172636			73	0.004327	0.010567	0.011603	0.017032	0.019065
74	0.083294	0.094689	0.112003	0.125392	0.168175			74	0.004737	0.009737	0.011161	0.016722	0.018926
75	0.080773	0.09115	0.108311	0.12145	0.165			75	0.003294	0.008833	0.009937	0.015869	0.017243
76	0.077861	0.089729	0.105215	0.118963	0.160856			76	0.002708	0.008185	0.009972	0.015007	0.016581
77	0.07705	0.087258	0.101997	0.115947	0.158118			77	0.00376	0.008027	0.009399	0.014426	0.016773
78	0.074909	0.084425	0.100094	0.11309	0.154011			78	0.002829	0.007214	0.008852	0.014229	0.015674
79	0.071587	0.081831	0.097516	0.110223	0.150044			79	0.002522	0.007737	0.008279	0.013498	0.01523
80	0.069415	0.078369	0.094534	0.10771	0.147501			80	0.001601	0.007787	0.008236	0.012232	0.01468
81	0.067654	0.076966	0.091851	0.104623	0.144074			81	0.002243	0.005844	0.007837	0.01256	0.014018
82	0.065342	0.074143	0.089088	0.102013	0.141122			82	0.001498	0.006118	0.007533	0.011914	0.01326
83	0.062381	0.072388	0.087291	0.099966	0.137695			83	0.001536	0.005836	0.007134	0.011042	0.012867
84	0.06168	0.071587	0.085414	0.096368	0.135023			84	0.001387	0.006168	0.006735	0.012073	0.011847
85	0.059819	0.067895	0.082485	0.095372	0.131391			85	-0.00024	0.005205	0.005823	0.010826	0.011289
86	0.057858	0.067456	0.080696	0.091623	0.129035			86	0.000428	0.005852	0.006136	0.010386	0.011664
87	0.056697	0.06429	0.078223	0.088016	0.125878			87	-0.00018	0.003843	0.00565	0.010001	0.011045
88	0.055216	0.062229	0.076074	0.086482	0.122684			88	0.000568	0.004524	0.005728	0.009598	0.011071
89	0.053024	0.061371	0.074698	0.084736	0.120262			89	0.001005	0.004375	0.005103	0.008736	0.010941
90	0.051263	0.059234	0.072497	0.082372	0.11826			90	0.000503	0.004599	0.005771	0.008371	0.01006
91	0.049732	0.056583	0.070515	0.080546	0.115103			91	-0.00042	0.003536	0.004686	0.008717	0.009014
92	0.04658	0.056287	0.069269	0.078104	0.112226			92	5.58e-05	0.003379	0.003645	0.008727	0.008543
93	0.04607	0.054131	0.066349	0.076075	0.110037			93	-0.00063	0.003619	0.00355	0.008033	0.008735
94	0.045209	0.0523	0.064902	0.074973	0.107802			94	-0.00062	0.002988	0.004036	0.007892	0.00782
95	0.043788	0.050487	0.064736	0.07283	0.105493			95	-0.00026	0.002988	0.003428	0.007714	0.008351
96	0.043138	0.050535	0.061237	0.070113	0.103043			96	0.000568	0.002225	0.003489	0.007536	0.008386
97	0.043268	0.048818	0.05986	0.068976	0.101125			97	-0.00015	0.00249	0.004001	0.007452	0.007802
98	0.041297	0.046682	0.058308	0.066956	0.097679			98	-0.00119	0.00181	0.003914	0.006299	0.007523
99	0.038785	0.045585	0.057352	0.065915	0.095901			99	-0.001	0.00342	0.00309	0.006674	0.007044
100	0.038015	0.043391	0.054581	0.063437	0.094727			100	-0.00107	0.002241	0.002586	0.005877	0.006538
101	0.036304	0.04279	0.054633	0.062	0.091449			101	-0.00097	0.000996	0.00348	0.006093	0.007018
102	0.036634	0.042723	0.052783	0.059627	0.089633			102	-0.00154	0.001527	0.002525	0.005221	0.006294
103	0.035933	0.041311	0.050634	0.058639	0.08846			103	-0.00098	0.001444	0.003645	0.006121	0.006521
104	0.034262	0.039289	0.05052	0.058551	0.086858			104	-0.00181	0.001577	0.002829	0.005474	0.005693
105	0.033292	0.038707	0.049486	0.056655	0.084157			105	-0.00109	0.001793	0.001892	0.005155	0.005614
106	0.032611	0.036857	0.04796	0.055006	0.082397			106	-0.00213	0.00098	0.003263	0.004171	0.004716
107	0.031841	0.036275	0.046469	0.054327	0.081122			107	-0.00267	0.000398	0.002048	0.005577	0.005536
108	0.03148	0.035273	0.046118	0.051893	0.078952			108	-0.00132	0.000581	0.001484	0.005024	0.004925
109	0.03002	0.034491	0.045031	0.050561	0.078132			109	-0.00219	0.000706	0.00177	0.00524	0.005649
110	0.028579	0.033709	0.043338	0.049944	0.076298			110	-0.00273	0.000598	0.001788	0.003974	0.004498
111	0.029119	0.032889	0.042952	0.047448	0.074286			111	-0.00232	0.001229	0.001553	0.004724	0.004158
112	0.028308	0.031687	0.041199	0.046804	0.072275			112	-0.00215	-0.00011	0.001284	0.004846	0.003583
113	0.026787	0.03142	0.040304	0.045869	0.071781			113	-0.00231	-0.00032	0.001406	0.004546	0.00462
114	0.027378	0.029512	0.039638	0.044714	0.069676			114	-0.00258	0.000515	0.001519	0.00359	0.004141
115	0.025417	0.028854	0.038436	0.042906	0.069108			115	-0.00235	0.000249	0.001007	0.003909	0.003731
116	0.025086	0.028434	0.038454	0.042597	0.06705			116	-0.00337	8.3e-06	0.001258	0.003037	0.003731
117	0.023205	0.02748	0.037752	0.041521	0.064713			117	-0.00255	0.000149	0.000338	0.003018	0.003705
118	0.023445	0.026336	0.035683	0.040498	0.064629			118	-0.00294	0.000656	0.002005	0.002315	0.003348
119	0.022415	0.026727	0.034341	0.040128	0.062562			119	-0.00332	-0.00046	0.000365	0.002868	0.002729
120	0.021284	0.026336	0.033324	0.038955	0.062236			120	-0.00329	-0.00078	0.000677	0.002437	0.002816
121	0.022264	0.024829	0.033026	0.037685	0.060643			121	-0.00173	0.000274	-6.1e-05	0.001893	0.002659
122	0.021204	0.023236	0.033482	0.0369	0.058939			122	-0.00282	-0.00034	0.000321	0.002371	0.003234
123	0.020944	0.023217	0.03235	0.035859	0.05744			123	-0.00318	-0.00046	0.000165	0.003149	0.002659
124	0.020363	0.023093	0.030763	0.034995	0.057058			124	-0.00313	-0.00036	-2.6e-05	0.002784	0.002798
125	0.019323	0.021891	0.030517	0.033143	0.056527			125	-0.00321	-0.0006	0.000243	0.002718	0.002197
126	0.019233	0.021805	0.029842	0.033363	0.053491			126	-0.004	-0.00113	0.000243	0.001865	0.002528
127	0.018522	0.021471	0.029281	0.033346	0.053296			127	-0.00334	-0.00027	0.000651	0.001528	0.002049
128	0.019293	0.020708	0.028264	0.031952	0.051824			128	-0.00318	-0.00077	-0.0006	0.002137	0.002554
129	0.017661	0.020155	0.028141	0.030127	0.051415			129	-0.00329	-0.00135	-0.0003	0.002297	0.002589
130	0.016871	0.019153	0.027939	0.029809	0.05026			130	-0.00349	-0.00123	-0.0001	0.001968	0.001883
131	0.018052	0.018734	0.026343	0.028583	0.049701			131	-0.00449	-0.00106	-0.00095	0.002259	0.002101
132	0.016571	0.018457	0.025905	0.028724	0.048127			132	-0.00439	-0.00126	-0.00023	0.001434	0.00204
133	0.017461	0.017932	0.0258	0.028045	0.046758			133	-0.0041	-0.00165	-0.0005	0.002287	0.001822
134	0.01583	0.01778	0.024668	0.027842	0.046982			134	-0.00446	-0.00138	-0.00108	0.001162	0.001735
135	0.01525	0.017026	0.02423	0.02689	0.044896			135	-0.00315	-0.00177	0.000191	0.001697	0.001648
136	0.014499	0.017179	0.023476	0.025435	0.044393			136	-0.00369	-0.00173	-0.00121	0.001668	0.001656
137	0.01523	0.016969	0.022581	0.025091	0.043247			137	-0.0037	-0.00157	0	0.001725	0.001316
138	0.01466	0.016225	0.022099	0.024482	0.042996			138	-0.00416	-0.00118	-0.00033	0.000703	0.001325
139	0.014159	0.015891	0.022406	0.023874	0.042111			139	-0.00438	-0.00164	0.000538	0.001153	0.001656
140	0.013709	0.015414	0.02202	0.022912	0.041646			140	-0.00362	-0.00159	-0.00035	0.000487	0.001639
141	0.013449	0.015271	0.021327	0.022375	0.041208			141	-0.00379	-0.00255	-0.00052	0.001078	0.001037
142	0.012738	0.014432	0.02052	0.022736	0.039746			142	-0.00477	-0.00123	-0.00062	0.00255	0.000689
143	0.012758	0.013497	0.020748	0.021537	0.039802			143	-0.00396	-0.00166	-8.7e-05	0.000703	0.000898
144	0.012518	0.013993	0.020336	0.021995	0.037464			144	-0.00463	-0.0023	-0.00155	0.000628	0.000479
145	0.012148	0.013144	0.019433	0.020911	0.037576			145	-0.00389	-0.00188	-0.00063	0.001069	0.001247
146	0.011878	0.012772	0.019608	0.020646	0.037585			146	-0.00428	-0.00125	-0.00074	0.000834	0.000453
147	0.011998	0.013697	0.018398	0.02002	0.036691			147	-0.00419	-0.00307	-0.00111	0.000525	0.000724
148	0.011728	0.013068	0.018126	0.02047	0.035062			148	-0.00458	-0.00186	-0.00132	0.000431	0.00068
149	0.010077	0.01178	0.018547	0.019685	0.034065			149	-0.00437	-0.00193	-0.00098	0.00045	0.000776
150	0.011507	0.011742	0.017039	0.018406	0.034624			150	-0.00396	-0.00256	-0.00082	0.000366	-2.6e-05
151	0.010557	0.011399	0.016925	0.0186	0.033022			151	-0.00475	-0.00193	-0.00183	-0.00031	0.001648
152	0.010727	0.010931	0.016881	0.018362	0.032193			152	-0.00524	-0.00271	-0.00156	0.000806	0.000148
153	0.010177	0.011074	0.015838	0.01852	0.031886			153	-0.00484	-0.00244	-0.00089	0.000862	0.000122
154	0.010247	0.011856	0.01639	0.018291	0.03156			154	-0.00513	-0.00232	-0.00186	0.000778	0.00102
155	0.009896	0.011246	0.016285	0.016633	0.031486			155	-0.0053	-0.00274	-0.00073	0.000694	-0.00016
156	0.009596	0.010302	0.016802	0.01613	0.03102			156	-0.00491	-0.00298	-0.00183	-0.00081	0.000131
157	0.009416	0.011675	0.014461	0.015584	0.02939			157	-0.00436	-0.00242	-0.00175	-0.00012	0.000497
158	0.008846	0.010244	0.01461	0.015698	0.028943			158	-0.00367	-0.00317	-0.00153	-0.00073	0.000793
159	0.009026	0.01033	0.015092	0.015716	0.029223			159	-0.00515	-0.00281	-0.00155	-0.00055	-0.0003
160	0.009156	0.009691	0.013961	0.015204	0.028245			160	-0.00372	-0.00315	-0.00175	-0.00063	0.000942
161	0.008395	0.007946	0.01368	0.014552	0.027407			161	-0.00502	-0.00225	-0.00047	-0.00023	0.001064
162	0.008956	0.008766	0.013987	0.014367	0.026746			162	-0.00484	-0.00317	-0.0015	-0.00063	4.36e-05
163	0.007925	0.008737	0.014241	0.013899	0.026392			163	-0.00621	-0.00292	-0.00138	2.81e-05	-6.1e-05
164	0.007325	0.008632	0.013338	0.01397	0.026131			164	-0.00479	-0.0029	-0.00168	-0.00094	0.000758
165	0.008305	0.009329	0.012645	0.012859	0.025684			165	-0.00547	-0.00229	-0.00128	-0.0007	0.00027
166	0.008435	0.00889	0.01311	0.013352	0.025554			166	-0.00522	-0.00255	-0.00185	-0.00078	8.72e-06
167	0.008015	0.008671	0.012821	0.013167	0.024716			167	-0.00516	-0.00359	-0.00121	-0.00054	0.000584
168	0.007445	0.008155	0.012198	0.01277	0.025656			168	-0.00508	-0.00286	-0.00229	-0.00067	-0.00015
169	0.006955	0.00764	0.012409	0.012003	0.02479			169	-0.00554	-0.00262	-0.00154	-0.00037	-3.5e-05
170	0.008135	0.007259	0.011505	0.012003	0.024781			170	-0.0053	-0.00302	-0.00071	-0.0014	5.23e-05
171	0.005874	0.007497	0.011926	0.011615	0.023924			171	-0.0045	-0.00301	-0.00172	-0.0007	-6.1e-05
172	0.006494	0.007478	0.011523	0.012082	0.022099			172	-0.00507	-0.00303	-0.00124	-0.00129	-0.00022
173	0.006174	0.007621	0.011505	0.010636	0.021922			173	-0.00481	-0.00305	-0.00211	-0.00058	5.23e-05
174	0.006464	0.007307	0.011874	0.011703	0.021586			174	-0.00478	-0.00284	-0.00244	0.000141	0.000915
175	0.006494	0.007745	0.010076	0.010239	0.021903			175	-0.00477	-0.00365	-0.00229	-0.00034	6.97e-05
176	0.006214	0.007078	0.010094	0.010592	0.021279			176	-0.00453	-0.00334	-0.00206	-0.00051	-0.00102
177	0.005313	0.0064	0.011041	0.010266	0.021065			177	-0.00488	-0.00291	-0.00199	-0.00113	0.000227
178	0.006754	0.006391	0.009962	0.01061	0.019705			178	-0.00554	-0.00377	-0.00186	-0.00225	-0.0006
179	0.006144	0.0064	0.010392	0.010327	0.020162			179	-0.0064	-0.00361	-0.0021	-0.00177	0.000192
180	0.005363	0.006696	0.010225	0.009075	0.019407			180	-0.00409	-0.0032	-0.00215	-0.0012	5.23e-05
181	0.006194	0.006944	0.00983	0.009322	0.019268			181	-0.00528	-0.00295	-0.00175	-0.00154	-0.00112
182	0.005864	0.006162	0.009331	0.009031	0.019119			182	-0.00552	-0.00276	-0.0028	-0.00244	-0.00063
183	0.004593	0.006334	0.009252	0.008458	0.0191			183	-0.00474	-0.00344	-0.0026	-0.00104	0.000427
184	0.005293	0.005313	0.009392	0.00934	0.018523			184	-0.0049	-0.0042	-0.00191	-0.00121	-0.00024
185	0.004673	0.005437	0.00848	0.008008	0.01883			185	-0.0045	-0.00319	-0.00259	-0.00256	-0.0008
186	0.004453	0.006572	0.009918	0.008449	0.016418			186	-0.00487	-0.0027	-0.00261	-0.00194	7.85e-05
187	0.004733	0.005332	0.008954	0.008819	0.017116			187	-0.00476	-0.00385	-0.0029	-0.00166	-0.00081
188	0.004393	0.00516	0.008322	0.008325	0.016753			188	-0.00487	-0.00317	-0.00253	-0.00176	-0.00078
189	0.004093	0.005036	0.009199	0.007637	0.017023			189	-0.00418	-0.0031	-0.00281	-0.00179	-0.0002
190	0.004333	0.005923	0.009383	0.007893	0.016046			190	-0.00482	-0.00418	-0.00167	-0.0021	-0.0003
191	0.004153	0.004102	0.008787	0.007779	0.015803			191	-0.00453	-0.00367	-0.00207	-0.00142	-0.00051
192	0.004363	0.005418	0.009041	0.008211	0.016195			192	-0.00545	-0.00414	-0.00344	-0.00185	-0.00054
193	0.004083	0.005132	0.007638	0.00792	0.01531			193	-0.00568	-0.00397	-0.00264	-0.00142	-0.00079
194	0.004143	0.004388	0.007735	0.00717	0.015738			194	-0.00482	-0.00319	-0.00247	-0.00217	-0.00044
195	0.004753	0.004226	0.008348	0.007055	0.01477			195	-0.00454	-0.00384	-0.00216	-0.00216	-0.00018
196	0.004223	0.00414	0.007305	0.007373	0.014602			196	-0.0051	-0.00255	-0.00209	-0.00137	-0.00085
197	0.003913	0.004388	0.007945	0.006306	0.014574			197	-0.00551	-0.00394	-0.00216	-0.0014	-0.00114
198	0.003582	0.004893	0.007682	0.006235	0.013941			198	-0.0059	-0.00357	-0.00266	-0.00213	-0.00052
199	0.003842	0.00454	0.00777	0.006279	0.014742			199	-0.00545	-0.00388	-0.00171	-0.00192	-0.00024
200	0.003812	0.0033	0.007735	0.007435	0.014472			200	-0.00543	-0.00324	-0.00262	-0.00116	-0.0005
201	0.003402	0.003586	0.006823	0.00657	0.014751			201	-0.0044	-0.0036	-0.00259	-0.00159	-0.00029
202	0.003102	0.003987	0.006814	0.00553	0.014397			202	-0.00387	-0.0044	-0.00219	-0.00162	9.59e-05
203	0.003082	0.003377	0.006568	0.006173	0.014407			203	-0.0051	-0.00422	-0.00272	-0.00172	-0.00051
204	0.004103	0.004121	0.007384	0.006279	0.013671			204	-0.00514	-0.00364	-0.00161	-0.00078	-0.00065
205	0.002982	0.003854	0.006805	0.005785	0.01423			205	-0.0053	-0.0037	-0.00271	-0.00092	-0.00069
206	0.003232	0.003319	0.006542	0.005988	0.013196			206	-0.00571	-0.00369	-0.00202	-0.00212	-0.00133
207	0.001761	0.003062	0.006121	0.005009	0.011799			207	-0.005	-0.00396	-0.00288	-0.00253	-0.00095
208	0.002852	0.004245	0.006147	0.005239	0.013075			208	-0.0049	-0.00366	-0.00302	-0.0023	-0.00033
209	0.003612	0.00331	0.006375	0.005274	0.01301			209	-0.00461	-0.00413	-0.00271	-0.00114	-0.00096
210	0.002852	0.002709	0.006393	0.004983	0.012591			210	-0.00441	-0.00419	-0.0025	-0.0013	-0.00158
211	0.003602	0.003901	0.006068	0.005636	0.011622			211	-0.00566	-0.00464	-0.00212	-0.00199	-0.00111
212	0.002151	0.003243	0.00613	0.004912	0.011883			212	-0.00541	-0.00423	-0.00275	-0.00217	-0.00096
213	0.002692	0.002356	0.006647	0.004974	0.011603			213	-0.00481	-0.00475	-0.00229	-0.00222	-0.00097
214	0.002382	0.002423	0.00606	0.004551	0.011957			214	-0.00525	-0.00384	-0.00211	-0.00233	-0.00098
215	0.002842	0.002156	0.005858	0.005027	0.011985			215	-0.00536	-0.00345	-0.0022	-0.00202	-0.00051
216	0.003012	0.003415	0.006077	0.004948	0.010896			216	-0.0053	-0.00427	-0.00182	-0.00233	-0.00074
217	0.003022	0.00269	0.005586	0.004974	0.010532			217	-0.00597	-0.00352	-0.00214	-0.00144	-0.00141
218	0.003402	0.003329	0.005963	0.005115	0.010914			218	-0.00569	-0.00435	-0.00181	-0.0021	-0.00121
219	0.002442	0.002938	0.006603	0.005098	0.011082			219	-0.00529	-0.00398	-0.00322	-0.00216	-0.0014
220	0.002682	0.002995	0.006226	0.004498	0.010579			220	-0.00526	-0.00409	-0.00227	-0.00285	-0.00215
221	0.002111	0.003224	0.005928	0.003704	0.010346			221	-0.00567	-0.00357	-0.0026	-0.00215	-0.00108
222	0.002221	0.002528	0.005481	0.003395	0.010654			222	-0.00571	-0.00395	-0.00237	-0.00251	0
223	0.002201	0.003501	0.005218	0.004454	0.010756			223	-0.00548	-0.00413	-0.00225	-0.00249	-0.00159
224	0.000841	0.002718	0.006095	0.003607	0.010952			224	-0.0049	-0.00435	-0.00238	-0.00152	-0.00179
225	0.001581	0.001774	0.005077	0.003942	0.01003			225	-0.00652	-0.00395	-0.00324	-0.00297	-0.00099
226	0.002322	0.003119	0.004806	0.003783	0.009136			226	-0.00585	-0.00442	-0.00274	-0.00333	-0.00093
227	0.002001	0.002442	0.004753	0.003069	0.008847			227	-0.00517	-0.00336	-0.00317	-0.00224	-0.00122
228	0.002201	0.002146	0.004692	0.003201	0.009871			228	-0.00571	-0.00357	-0.00279	-0.00255	-0.0012
229	0.001861	0.003367	0.004674	0.004745	0.00976			229	-0.00484	-0.00398	-0.00292	-0.00271	-0.00119
230	0.001701	0.002337	0.005358	0.003995	0.009909			230	-0.0053	-0.00426	-0.00283	-0.00208	-0.00085
231	0.001871	0.001431	0.005209	0.003581	0.00976			231	-0.00547	-0.00307	-0.00251	-0.00258	-0.00072
232	0.001971	0.001335	0.005402	0.003343	0.008921			232	-0.00624	-0.00408	-0.00312	-0.002	-0.00123
233	0.001961	0.001965	0.004253	0.002505	0.008502			233	-0.00505	-0.00362	-0.00275	-0.00258	-0.00228
234	0.002702	0.002118	0.004955	0.002611	0.008605			234	-0.00566	-0.00398	-0.002	-0.00299	-0.0013
235	0.002732	0.002862	0.005104	0.002919	0.009648			235	-0.00488	-0.00476	-0.00316	-0.00315	-0.00024
236	0.001281	0.001574	0.003718	0.003334	0.008558			236	-0.00624	-0.00365	-0.00302	-0.00269	-0.00105
237	0.001951	0.000944	0.003885	0.00299	0.008595			237	-0.00576	-0.00391	-0.00174	-0.00243	-0.00134
238	0.001451	0.00166	0.00463	0.002734	0.008735			238	-0.00601	-0.00335	-0.00277	-0.00306	-0.00182
239	0.001041	0.001908	0.005042	0.001385	0.008344			239	-0.00497	-0.00382	-0.00201	-0.00341	-0.00164
240	0.001921	0.001288	0.003622	0.002893	0.007534			240	-0.00568	-0.00369	-0.00252	-0.00256	-0.00162
241	0.001941	0.001602	0.003709	0.003475	0.008139			241	-0.00594	-0.00388	-0.0019	-0.00301	-0.00153
242	0.001751	0.002308	0.004385	0.002461	0.008474			242	-0.00529	-0.0038	-0.00253	-0.00242	-0.00184
243	0.001921	0.00062	0.004341	0.002566	0.007571			243	-0.0053	-0.00468	-0.00163	-0.00215	-0.00146
244	0.002542	0.001059	0.003683	0.003854	0.007534			244	-0.00543	-0.00489	-0.00212	-0.00279	-0.00149
245	0.001701	0.001946	0.004718	0.002425	0.008018			245	-0.00544	-0.00323	-0.00305	-0.00258	-0.0008
246	0.001361	0.001183	0.004279	0.001993	0.007785			246	-0.00555	-0.00431	-0.00231	-0.00197	-0.00163
247	0.000991	0.000706	0.004762	0.002663	0.007059			247	-0.00524	-0.0045	-0.00292	-0.00258	-0.00173
248	0.00073	0.001927	0.004402	0.002752	0.007832			248	-0.00531	-0.00386	-0.00319	-0.00292	-0.00126
249	0.001441	0.001288	0.003762	0.001244	0.006919			249	-0.00538	-0.00397	-0.00248	-0.00247	-0.00154
250	0.001241	0.001078	0.00392	0.00209	0.006426			250	-0.00605	-0.00394	-0.00279	-0.00164	-0.00136
251	0.002011	0.001698	0.004972	0.002478	0.006696			251	-0.00536	-0.00451	-0.00318	-0.00263	-0.00141
252	0.001781	0.001021	0.003709	0.002381	0.007385			252	-0.00559	-0.00442	-0.00294	-0.00172	-0.001
253	0.001111	0.00186	0.004323	0.001755	0.007459			253	-0.00501	-0.00404	-0.00275	-0.00324	-0.00151
254	0.00034	0.001507	0.004288	0.00149	0.00745			254	-0.00537	-0.00354	-0.00122	-0.00289	-0.00136
255	0.00075	0.002003	0.003324	0.001693	0.006128			255	-0.0053	-0.00443	-0.00296	-0.00242	-0.00119
256	0.00059	0.001602	0.003508	0.001976	0.007143			256	-0.00571	-0.00469	-0.00218	-0.00228	-0.00096
257	0.000881	0.001078	0.003815	0.001102	0.007059			257	-0.00574	-0.00402	-0.00319	-0.00256	-0.00122
258	0.001341	0.000868	0.00349	0.001067	0.006621			258	-0.00499	-0.00355	-0.00235	-0.00188	-0.00121
259	0.000801	0.000401	0.004613	0.001614	0.005886			259	-0.00571	-0.00466	-0.00273	-0.00232	-0.00158
260	0.000931	0.001536	0.00385	0.001764	0.006435			260	-0.00533	-0.00349	-0.00244	-0.00224	-0.00153
261	0.001301	0.00104	0.004332	0.001764	0.006621			261	-0.00497	-0.00437	-0.00249	-0.00266	-0.00016
262	0.001001	0.000315	0.002385	0.001058	0.006947			262	-0.00477	-0.00465	-0.00369	-0.00235	-0.00136
263	0.001351	0.000887	0.003157	0.000626	0.006333			263	-0.00584	-0.00448	-0.00246	-0.00399	-0.00111
264	0.001191	0.00166	0.003403	0.000723	0.006845			264	-0.00548	-0.00393	-0.00244	-0.00237	-0.00195
265	0.001151	0.00063	0.00335	0.001155	0.007403			265	-0.0052	-0.0047	-0.00277	-0.00309	-0.00146
266	0.002091	0.001288	0.002613	0.001023	0.005876			266	-0.0058	-0.00455	-0.00173	-0.00353	-0.00096
267	0.001361	0.001641	0.003315	0.001332	0.005988			267	-0.00478	-0.00389	-0.00297	-0.00226	-0.00137
268	0.00014	0.000572	0.003902	0.001552	0.006239			268	-0.0056	-0.00398	-0.00247	-0.00214	-0.00107
269	0.001321	0.000572	0.003078	0.001958	0.006565			269	-0.00598	-0.00467	-0.00292	-0.00227	-0.00194
270	0.001461	0.001593	0.002298	0.001429	0.006202			270	-0.00567	-0.00401	-0.00241	-0.00289	-0.00152
271	-1e-05	0.001259	0.003745	0.00172	0.005746			271	-0.00451	-0.00462	-0.00254	-0.00275	-0.00136
272	0.001341	0.001049	0.00292	0.001499	0.006081			272	-0.00552	-0.00442	-0.00337	-0.00249	-0.00113
273	0.000991	0.000801	0.002911	0.001561	0.005737			273	-0.00514	-0.00496	-0.00315	-0.00341	-0.00118
274	-0.00017	0.000868	0.00321	0.001182	0.006239			274	-0.00619	-0.00468	-0.00274	-0.00201	-0.00205
275	0.001261	0.001402	0.003552	0.001376	0.006314			275	-0.00562	-0.00425	-0.00281	-0.00329	-0.00104
276	0.00017	0.001364	0.003525	0.001058	0.005541			276	-0.00599	-0.00373	-0.0022	-0.00291	-0.00062
277	0.001351	0.00104	0.002999	0.001173	0.004992			277	-0.00555	-0.00407	-0.0022	-0.00265	-0.00138
278	0.000851	0.001507	0.002368	0.00127	0.005494			278	-0.00541	-0.00392	-0.00234	-0.00254	-0.00178
279	0.00019	0.000715	0.003376	0.000697	0.004852			279	-0.00592	-0.00418	-0.00282	-0.00268	-0.00133
280	-4e-05	0.000706	0.003008	0.000997	0.005718			280	-0.00458	-0.00404	-0.00256	-0.00282	-0.00162
281	0.00067	0.00041	0.003543	0.000194	0.006416			281	-0.0058	-0.00398	-0.00288	-0.00291	-0.00068
282	0.001071	0.000839	0.002464	0.000547	0.0046			282	-0.0064	-0.0044	-0.00288	-0.0025	-0.00175
283	0.00076	0.001698	0.002657	0.000855	0.00583			283	-0.00612	-0.00435	-0.00229	-0.00315	-0.001
284	1e-05	0.001612	0.002324	0.000353	0.005392			284	-0.00535	-0.00375	-0.00268	-0.00239	-0.00107
285	-0.00045	0.000935	0.00335	0.001005	0.005187			285	-0.00469	-0.00435	-0.00294	-0.00179	-0.00179
286	0.00016	0.000668	0.002149	0.001182	0.00609			286	-0.00571	-0.00482	-0.00273	-0.00232	-0.00084
287	-0.00047	0.001498	0.00328	0.0009	0.005383			287	-0.00503	-0.00443	-0.00327	-0.00277	-0.00111
288	0.00037	0.000315	0.002797	0.000697	0.005308			288	-0.00609	-0.00383	-0.00316	-0.0023	-0.00207
289	-0.00047	0.001679	0.00349	0.001049	0.005392			289	-0.00601	-0.00432	-0.00299	-0.00251	-0.00094
290	0.00029	0.001116	0.002517	-3.5e-05	0.005569			290	-0.00514	-0.00423	-0.00318	-0.00217	-0.00216
291	0.00029	0.00082	0.003183	-0.00025	0.005485			291	-0.00578	-0.00407	-0.00277	-0.00211	-0.0018
292	0.001031	0.000277	0.00242	0.000326	0.004563			292	-0.00386	-0.00414	-0.00283	-0.00328	-0.00184
293	0.000991	0.000572	0.002569	9.7e-05	0.004563			293	-0.00485	-0.00381	-0.00299	-0.00343	-0.00193
294	0.000821	0.001297	0.002771	0.001058	0.005234			294	-0.00525	-0.0043	-0.00351	-0.00278	-0.00103
295	0.00061	5.72e-05	0.003104	0.00015	0.005029			295	-0.00553	-0.00434	-0.00321	-0.003	-0.00092
296	0.00038	0	0.002412	0.000714	0.004526			296	-0.00503	-0.0041	-0.00285	-0.00334	-0.00195
297	0.000931	0.001059	0.002806	0.000494	0.005131			297	-0.00553	-0.00365	-0.00275	-0.00309	-0.00173
298	-3e-05	0.00021	0.00178	0.001429	0.005001			298	-0.0063	-0.00354	-0.00311	-0.00351	-0.0007
299	-8e-05	0.000839	0.002122	0.001032	0.004293			299	-0.00489	-0.00393	-0.00237	-0.00355	-0.00123
300	-0.00056	0.000563	0.00221	0.001067	0.003874			300	-0.0052	-0.00412	-0.00292	-0.00365	-0.00099
301	-3e-05	0.000706	0.001657	0.000265	0.004545			301	-0.00604	-0.00403	-0.00288	-0.00351	-0.00166
302	-0.00078	0.001021	0.00271	0.000176	0.005038			302	-0.00579	-0.00401	-0.0025	-0.00349	-0.00153
303	0.00045	0.000973	0.002429	0.00067	0.004712			303	-0.00579	-0.00447	-0.00329	-0.00247	-0.00089
304	0.001181	0.000734	0.00221	0.001155	0.004591			304	-0.00655	-0.00433	-0.00272	-0.00336	-0.00146
305	-1e-05	0.000181	0.002903	0.000679	0.00434			305	-0.0052	-0.00372	-0.00319	-0.00232	-0.00161
306	-0.00071	0.000649	0.002219	0.001244	0.004861			306	-0.00553	-0.0042	-0.00251	-0.00193	-0.00199
307	-0.00019	0.000696	0.002298	0.000714	0.004349			307	-0.00588	-0.00428	-0.00293	-0.00348	-0.00245
308	-0.00096	0.000525	0.002666	0.000132	0.004265			308	-0.00563	-0.00377	-0.00255	-0.00301	-0.00209
309	-0.0004	-0.00061	0.001903	-0.00033	0.003837			309	-0.00642	-0.00472	-0.00299	-0.00293	-0.0021
310	-0.0003	0.00063	0.001535	0.00037	0.003921			310	-0.0054	-0.00343	-0.0031	-0.00303	-0.00213
311	-9e-05	-0.00016	0.002254	0.001155	0.005355			311	-0.00662	-0.00373	-0.0023	-0.00256	-0.00099
312	0.00066	0.000353	0.002613	0.000203	0.004423			312	-0.00504	-0.00481	-0.00321	-0.00307	-0.00166
313	-0.00059	0.000477	0.002052	0.000609	0.004796			313	-0.00514	-0.00415	-0.0031	-0.00341	-0.00192
314	0.00018	-2.9e-05	0.001272	0.000432	0.003995			314	-0.00595	-0.00438	-0.00303	-0.00303	-0.00196
315	0.00016	0.000868	0.002876	0.0009	0.004107			315	-0.00553	-0.00432	-0.00237	-0.00334	-0.00208
316	-0.0003	0.000343	0.002254	0.000732	0.005047			316	-0.0055	-0.00493	-0.00243	-0.00262	-0.00182
317	-0.00092	0.000525	0.00178	0.000529	0.00406			317	-0.00478	-0.00542	-0.00293	-0.00415	-0.0004
318	0.00035	0.000572	0.00207	0.000229	0.005206			318	-0.00542	-0.00442	-0.00196	-0.0029	-0.00153
319	0.00023	-9.5e-06	0.00157	0.000935	0.004191			319	-0.00501	-0.00398	-0.00215	-0.00303	-0.00172
320	0.00038	0.000353	0.001552	-4.4e-05	0.004051			320	-0.00524	-0.00472	-0.00253	-0.00306	-0.00219
321	-0.00102	0.000248	0.001412	-0.00094	0.003837			321	-0.00643	-0.00467	-0.00289	-0.00322	-0.00192
322	0.00055	-0.00099	0.002078	0.000273	0.003576			322	-0.00584	-0.00423	-0.00241	-0.00237	-0.0017
323	-0.00066	-0.0003	0.001491	-0.00052	0.003446			323	-0.00557	-0.00432	-0.0024	-0.00332	-0.00205
324	-0.00042	-6.7e-05	0.001701	0.000326	0.003939			324	-0.00598	-0.00393	-0.00291	-0.00319	-0.0019
325	-0.00038	-9.5e-06	0.002613	0.000644	0.004098			325	-0.00619	-0.00433	-0.00262	-0.00381	-0.00147
326	-8e-05	0.00021	0.001587	0.000512	0.003967			326	-0.00648	-0.00327	-0.00262	-0.00347	-0.00205
327	8.01e-05	-0.0007	0.001833	5.29e-05	0.004572			327	-0.00478	-0.00365	-0.00304	-0.00405	-0.00144
328	-0.00087	4.77e-05	0.001438	0.000476	0.003604			328	-0.00557	-0.00436	-0.00229	-0.00313	-0.00135
329	-0.00158	-0.00022	0.001587	0.000265	0.004079			329	-0.00505	-0.00388	-0.0021	-0.0029	-0.00231
330	0.00031	0.000267	0.001412	-0.00045	0.004349			330	-0.00535	-0.00371	-0.00281	-0.0027	-0.00188
331	-0.00044	-0.00061	0.001035	-0.00014	0.004507			331	-0.00559	-0.00368	-0.00309	-0.00307	-0.002
332	-0.00127	-0.00024	0.001482	0.000661	0.004507			332	-0.0061	-0.00418	-0.00282	-0.00261	-0.00222
333	-0.00066	0.000172	0.001833	-0.00042	0.004833			333	-0.00527	-0.0041	-0.0033	-0.00328	-0.0023
334	-0.0016	0.000362	0.001763	-0.00076	0.004368			334	-0.00651	-0.00431	-0.00255	-0.00355	-0.00175
335	-0.00153	-0.00049	0.001342	-0.00064	0.00366			335	-0.00567	-0.00472	-0.00242	-0.00336	-0.0026
336	0.00011	0.001154	0.000912	-0.00014	0.003939			336	-0.00503	-0.0039	-0.00295	-0.00364	-0.00169
337	-0.00044	-9.5e-06	0.001096	-0.00026	0.002831			337	-0.00612	-0.00417	-0.00269	-0.00337	-0.0018
338	-0.00174	-0.00088	0.001315	-0.00011	0.003166			338	-0.00579	-0.00483	-0.0026	-0.00396	-0.00261
339	-0.00017	-0.00069	0.00221	-0.00013	0.003958			339	-0.00584	-0.00464	-0.00296	-0.00339	-0.00164
340	-0.00021	-0.00018	0.002368	-0.00072	0.003036			340	-0.00563	-0.00364	-0.00345	-0.00337	-0.00182
341	-0.00054	-0.00036	0.001175	-0.00038	0.003678			341	-0.00571	-0.00447	-0.00273	-0.00333	-0.0026
342	-0.00043	-0.00044	0.002245	0.000229	0.004032			342	-0.00561	-0.00413	-0.00185	-0.00394	-0.00244
343	-0.00084	-0.0004	0.001324	-0.00015	0.003939			343	-0.00478	-0.00441	-0.00319	-0.00339	-0.00234
344	-0.00105	-0.0002	0.000631	0.000388	0.003446			344	-0.00672	-0.00408	-0.00248	-0.00409	-0.00229
345	-0.00082	4.77e-05	0.001614	-8.8e-05	0.003976			345	-0.00558	-0.00398	-0.00174	-0.00317	-0.00271
346	-0.00107	-0.00051	0.00171	0.000115	0.00285			346	-0.00524	-0.00447	-0.00333	-0.00227	-0.0018
347	-0.00065	0.000258	0.001087	-0.0005	0.003548			347	-0.00584	-0.00411	-0.00179	-0.0049	-0.00232
348	-0.00097	-7.6e-05	0.001131	1.76e-05	0.002831			348	-0.0057	-0.00346	-0.00236	-0.00336	-0.0029
349	-0.00098	0.0002	0.001806	7.06e-05	0.00352			349	-0.0063	-0.00431	-0.00214	-0.00249	-0.00201
350	-0.00125	-0.0006	0.000956	-0.00067	0.004135			350	-0.00543	-0.00372	-0.00217	-0.00414	-0.00179
351	-0.00052	-0.00023	0.00207	-0.00125	0.003744			351	-0.00543	-0.00406	-0.00292	-0.0034	-0.00257
352	-0.0017	-0.00092	0.00114	-0.0004	0.002924			352	-0.0053	-0.00446	-0.00229	-0.00363	-0.00204
353	-0.00117	-0.00094	0.001412	-0.00037	0.002943			353	-0.00482	-0.00432	-0.00317	-0.00368	-0.00109
354	0.00065	-0.00056	0.002517	-0.00061	0.003576			354	-0.006	-0.00407	-0.00304	-0.00353	-0.00186
355	-0.00076	-0.00109	0.001692	8.82e-06	0.003213			355	-0.00589	-0.00429	-0.00233	-0.00424	-0.00176
356	-0.00138	-0.0005	0.001333	-0.00055	0.002971			356	-0.00557	-0.00486	-0.00249	-0.00371	-0.00129
357	-0.0014	-0.00019	0.001947	-0.00075	0.003045			357	-0.00516	-0.00443	-0.00273	-0.00374	-0.0021
358	3e-05	-0.00043	0.001175	-0.00063	0.00325			358	-0.00562	-0.0037	-0.00228	-0.00226	-0.00192
359	-0.00114	-0.00039	0.001745	-0.00056	0.00284			359	-0.00542	-0.00369	-0.0028	-0.00386	-0.00083
360	-0.00143	-0.00085	0.001543	-0.00148	0.003222			360	-0.00515	-0.00419	-0.002	-0.00436	-0.00176
361	-0.0007	-0.00086	0.001368	0.000159	0.003166			361	-0.00526	-0.00329	-0.00273	-0.00365	-0.00248
362	-0.00046	-0.00034	0.001017	-0.00066	0.00298			362	-0.00571	-0.00435	-0.00328	-0.00329	-0.00169
363	-0.00128	-0.00045	0.001359	-0.00053	0.003902			363	-0.00576	-0.00415	-0.0017	-0.00368	-0.00149
364	-0.00103	0.000286	0.002078	-0.00092	0.003557			364	-0.00594	-0.0044	-0.00299	-0.00339	-0.00228
365	-0.00096	0.000591	0.00157	-0.00022	0.004144			365	-0.00568	-0.00393	-0.00278	-0.00318	-0.00194
366	-0.00132	7.63e-05	0.001824	-0.00084	0.00312			366	-0.00547	-0.00367	-0.00258	-0.00306	-0.00111
367	-0.00169	-0.0005	0.00178	-0.0003	0.004219			367	-0.00596	-0.00398	-0.0024	-0.00434	-0.00249
368	-0.00086	-0.00066	0.000859	-0.00147	0.002496			368	-0.00536	-0.00428	-0.00219	-0.00277	-0.00211
369	-0.00082	-0.00079	0.0005	-0.00116	0.002719			369	-0.00616	-0.0037	-0.00253	-0.00365	-0.00048
370	-0.00075	-0.00114	0.001614	-0.00037	0.002784			370	-0.00533	-0.00435	-0.00236	-0.00424	-0.0035
371	-0.00082	-0.00141	0.001175	-0.001	0.003529			371	-0.00516	-0.00349	-0.0032	-0.00399	-0.00215
372	-0.00044	-0.00084	0.00171	0.00037	0.00284			372	-0.00472	-0.00438	-0.00219	-0.00338	-0.00136
373	-0.00141	-0.00078	0.00171	-0.00132	0.003138			373	-0.00589	-0.00437	-0.00279	-0.00508	-0.00231
374	-0.00108	-0.0012	0.001263	-0.00015	0.003427			374	-0.0061	-0.00349	-0.00318	-0.00408	-0.00171
375	-0.00053	-0.00105	0.000719	-0.0004	0.002552			375	-0.0053	-0.00373	-0.00208	-0.00309	-0.0026
376	-0.00116	-0.00034	0.001359	-0.00116	0.002449			376	-0.00504	-0.00412	-0.00338	-0.00437	-0.00187
377	-0.00088	-0.00011	0.000307	-0.00133	0.0023			377	-0.00593	-0.00335	-0.0027	-0.00337	-0.00269
378	-0.00064	-0.00104	5.26e-05	-0.00026	0.002235			378	-0.00522	-0.00371	-0.00267	-0.00408	-0.00203
379	-0.00065	-0.00086	0.00171	-0.00042	0.002784			379	-0.00495	-0.00415	-0.00244	-0.00411	-0.00194
380	-0.00193	-0.00043	0.00121	-0.00096	0.001499			380	-0.00606	-0.00356	-0.00371	-0.00412	-0.0018
381	-0.0004	-0.00159	0.000438	-0.00036	0.00257			381	-0.00574	-0.00457	-0.0018	-0.00512	-0.00237
382	-0.00067	0.000525	0.001429	-0.00122	0.001779			382	-0.00571	-0.0038	-0.00338	-0.00376	-0.00246
383	-0.00114	-0.00052	0.000938	-0.00014	0.002496			383	-0.0059	-0.00257	-0.00207	-0.00335	-0.00248
384	-0.00051	-0.00137	0.000193	-0.00117	0.00311			384	-0.00532	-0.00419	-0.00252	-0.0036	-0.0016
385	-0.00118	-0.00103	0.001175	-0.00065	0.002263			385	-0.00417	-0.00354	-0.00234	-0.00352	-0.00275
386	-0.00066	-0.00067	0.000728	-0.00102	0.002449			386	-0.00545	-0.00289	-0.00302	-0.00415	-0.00262
387	-0.00125	-0.00111	0.00114	-0.00114	0.002524			387	-0.00493	-0.00433	-0.00301	-0.00402	-0.00182
388	-0.00222	-0.00126	0.00121	-0.00088	0.003082			388	-0.00568	-0.00348	-0.00213	-0.00447	-0.00264
389	-0.0021	-0.00074	0.000789	-0.00035	0.002337			389	-0.00614	-0.00338	-0.00279	-0.00311	-0.00166
390	-0.00076	-3.8e-05	0.000859	-0.00151	0.002319			390	-0.00493	-0.00374	-0.00242	-0.00437	-0.00248
391	-0.00212	-0.00125	0.000684	-0.00165	0.002589			391	-0.00505	-0.0045	-0.00285	-0.00368	-0.0024
392	-0.00088	-0.00038	0.001429	-0.00063	0.002589			392	-0.00518	-0.00346	-0.00246	-0.00341	-0.0019
393	-0.00076	-0.00042	0.001359	-0.00048	0.002459			393	-0.00428	-0.00455	-0.00207	-0.00481	-0.00188
394	-0.00051	-0.00064	8.77e-05	-0.00028	0.003204			394	-0.00562	-0.00354	-0.00233	-0.00373	-0.00223
395	-0.0004	-0.00031	0.000877	-0.00156	0.003408			395	-0.00557	-0.00322	-0.00272	-0.00408	-0.00194
396	-0.00169	-0.00081	0.000702	-0.001	0.002589			396	-0.00561	-0.00389	-0.00221	-0.00336	-0.00205
397	-0.00137	-0.00059	0.000675	-0.00053	0.002775			397	-0.00465	-0.00394	-0.00236	-0.00417	-0.00198
398	-0.00149	-0.00028	0.000386	-0.00056	0.00217			398	-0.00491	-0.00392	-0.00213	-0.00417	-0.00206
399	-0.00143	0.00042	-0.00041	-0.00057	0.00325			399	-0.00536	-0.00343	-0.0024	-0.00545	-0.0019
400	-0.00104	-0.00186	-0.00027	-0.00098	0.002375			400	-0.00539	-0.00364	-0.00224	-0.0035	-0.00112
401	-0.00102	-0.00021	-0.00029	-0.00072	0.002663			401	-0.00423	-0.00359	-0.00148	-0.00361	-0.00252
402	-0.00122	-0.0004	-0.00047	-0.00061	0.002384			402	-0.00582	-0.00393	-0.00217	-0.00453	-0.00197
403	-0.00052	-0.00037	0.000719	-0.0014	0.002505			403	-0.00426	-0.00387	-0.00286	-0.00421	-0.00188
404	-0.00045	-0.00104	0.000324	-0.0012	0.001928			404	-0.00512	-0.00302	-0.00265	-0.00377	-0.0029
405	-0.0015	-0.0004	0.000184	-0.00056	0.002468			405	-0.00535	-0.00305	-0.00306	-0.00458	-0.00296
406	-0.0002	-0.00077	0.000237	-0.00146	0.002263			406	-0.00498	-0.00297	-0.00256	-0.00384	-0.00214
407	-0.00104	-0.00049	0.000298	-0.00051	0.00176			407	-0.00459	-0.00225	-0.00224	-0.00345	-0.00186
408	-0.00174	-0.00138	0.000886	-0.00138	0.001704			408	-0.00558	-0.00293	-0.00252	-0.00319	-0.00185
409	-0.0015	-0.00125	0.000719	-0.00034	0.002021			409	-0.0047	-0.0031	-0.00284	-0.00412	-0.00272
410	-0.0002	-0.00024	0.000579	-0.00027	0.002179			410	-0.00509	-0.00348	-0.00287	-0.00421	-0.00162
411	-0.00132	-0.00103	0.00043	-0.00098	0.001537			411	-0.00481	-0.00321	-0.00276	-0.00445	-0.00291
412	-0.00089	-0.00106	0.000316	-0.00054	0.002589			412	-0.00566	-0.00386	-0.00283	-0.00434	-0.00165
413	-0.00157	-0.00107	-0.00029	-0.00039	0.002216			413	-0.0054	-0.0037	-0.00202	-0.00315	-0.00269
414	-0.00073	-0.00093	0.001026	-0.00146	0.002859			414	-0.00479	-0.00347	-0.00305	-0.00394	-0.00278
415	-0.00049	-0.00031	0.000491	-0.00121	0.002477			415	-0.00533	-0.00332	-0.00211	-0.00447	-0.00175
416	-0.00142	-0.00104	0.000403	-0.00077	0.002403			416	-0.00465	-0.00346	-0.00223	-0.00412	-0.003
417	-0.00151	-0.00025	0.000447	-0.00112	0.001974			417	-0.00436	-0.00356	-0.00225	-0.00337	-0.00257
418	-0.0004	-2.9e-05	0.000509	-0.00043	0.001909			418	-0.00497	-0.00344	-0.00286	-0.0046	-0.00182
419	-0.00068	-0.00051	0.000666	-0.00063	0.001788			419	-0.00511	-0.00344	-0.00249	-0.0038	-0.00228
420	-0.00071	-0.00121	0.001307	-0.00096	0.002179			420	-0.00444	-0.00312	-0.00265	-0.00386	-0.00215
421	-0.00122	0.0002	-0.00011	-0.00233	0.002403			421	-0.00509	-0.00452	-0.00322	-0.003	-0.00114
422	-0.00147	-0.00196	0.00064	-0.00037	0.002365			422	-0.00552	-0.00427	-0.00249	-0.00418	-0.00254
423	-0.00029	-0.00029	0.001201	-0.00069	0.002449			423	-0.00489	-0.00328	-0.00299	-0.00449	-0.00226
424	-0.0005	-0.00163	0.000631	-0.00063	0.001509			424	-0.00544	-0.00329	-0.00292	-0.00375	-0.00283
425	-0.00055	-0.00076	-0.00026	-0.00128	0.002486			425	-0.00504	-0.00331	-0.0024	-0.00429	-0.00235
426	-0.00187	-0.00043	0.000123	-0.00165	0.001974			426	-0.005	-0.0034	-0.00285	-0.00396	-0.00297
427	-0.00091	-8.6e-05	-3.5e-05	-0.00122	0.002244			427	-0.00543	-0.00306	-0.0024	-0.00388	-0.00204
428	-0.0011	-0.00076	0.000316	-0.00063	0.002393			428	-0.00475	-0.0034	-0.00257	-0.00373	-0.00229
429	-0.001	-0.0003	0.000447	-0.00123	0.001257			429	-0.00478	-0.00249	-0.00192	-0.00378	-0.00189
430	-0.00081	-0.00054	-0.00011	-0.00124	0.002449			430	-0.00444	-0.0027	-0.00253	-0.00296	-0.0025
431	-0.00061	-0.00063	0.000649	-0.00136	0.002226			431	-0.00519	-0.00345	-0.00207	-0.00406	-0.0014
432	-0.00074	-7.6e-05	-1.8e-05	-0.00181	0.001835			432	-0.00503	-0.00357	-0.00227	-0.00441	-0.00249
433	-0.00065	-0.00044	-0.00019	-0.00145	0.002831			433	-0.00556	-0.00308	-0.00205	-0.00536	-0.0019
434	-0.00122	-0.00032	-0.00021	-0.00109	0.002058			434	-0.00513	-0.00323	-0.00255	-0.00429	-0.00203
435	-0.00123	-0.00068	0.000754	-0.00108	0.001797			435	-0.00472	-0.00323	-0.0023	-0.00419	-0.0033
436	-0.0009	-0.0009	0.000105	-0.00071	0.000969			436	-0.00395	-0.00291	-0.00302	-0.00317	-0.00205
437	-0.0013	-0.0001	0.000298	-0.00188	0.002179			437	-0.00556	-0.00369	-0.00245	-0.00382	-0.00177
438	0.00011	-0.00052	0.000491	-0.00141	0.000987			438	-0.00483	-0.00386	-0.00285	-0.00471	-0.00201
439	-0.00084	-0.00072	0.000623	-0.00108	0.001443			439	-0.00502	-0.00274	-0.00249	-0.00427	-0.00239
440	-0.00098	-0.00113	0.000219	-0.00158	0.000987			440	-0.00457	-0.00396	-0.00249	-0.00449	-0.00191
441	-0.00032	-0.00046	0.000675	-0.00107	0.001769			441	-0.00515	-0.0036	-0.00189	-0.00444	-0.00202
442	-0.00067	-0.00078	0.000693	-0.00049	0.002393			442	-0.00463	-0.00331	-0.00211	-0.00399	-0.0019
443	-0.00125	-0.00099	-0.00021	-0.00125	0.00163			443	-0.00485	-0.00242	-0.00207	-0.00361	-0.0017
444	-0.0005	-0.00037	0.000675	-0.00123	0.001173			444	-0.00449	-0.00349	-0.00177	-0.00427	-0.00217
445	-0.00078	-0.0015	0.00043	-0.00123	0.001993			445	-0.00444	-0.00253	-0.00199	-0.00366	-0.00193
446	-0.00028	-0.00105	0.000307	-0.00127	0.001052			446	-0.0041	-0.00243	-0.002	-0.00391	-0.00108
447	-0.00063	-0.0003	-0.00031	-0.00147	0.001937			447	-0.00591	-0.00301	-0.00202	-0.00322	-0.00207
448	-0.00095	0.000591	0.000482	-0.00117	0.001211			448	-0.00548	-0.00266	-0.00128	-0.00392	-0.0018
449	-0.00097	-0.00057	0.001061	-0.00063	0.002077			449	-0.00401	-0.00285	-0.00274	-0.00423	-0.00159
450	-0.00122	-0.00107	-0.00039	-0.00095	0.00176			450	-0.00448	-0.00321	-0.00167	-0.00435	-0.00182
451	-0.00085	-0.00169	7.02e-05	-0.00135	0.001844			451	-0.00437	-0.00267	-0.00273	-0.00459	-0.00236
452	-0.00046	-0.0013	0.000798	0.000132	0.002086			452	-0.00393	-0.00306	-0.00235	-0.00406	-0.00242
453	-0.00172	-0.00042	0.000474	-0.00109	0.001937			453	-0.00486	-0.00277	-0.00211	-0.00275	-0.00224
454	-0.00114	-0.00053	0.000175	-0.00198	0.002449			454	-0.00463	-0.00266	-0.00199	-0.00396	-0.00145
455	-0.00142	-0.00219	0.000631	-0.00224	0.001443			455	-0.00503	-0.0024	-0.00262	-0.00389	-0.00205
456	-0.00084	-0.0004	0.000684	-0.00201	0.001714			456	-0.00468	-0.00276	-0.0026	-0.00385	-0.00228
457	-0.00213	-0.0016	-0.00012	-0.0015	0.002086			457	-0.00455	-0.00255	-0.00199	-0.0041	-0.00205
458	-0.00041	-0.00198	0.000202	-0.00125	0.002673			458	-0.00495	-0.00274	-0.00294	-0.00351	-0.00183
459	-0.00167	-9.5e-06	-0.00022	-0.00095	0.001229			459	-0.00464	-0.00323	-0.00198	-0.0032	-0.00214
460	-0.00149	-0.00039	0.000886	-0.00154	0.002235			460	-0.00439	-0.00259	-0.00173	-0.00321	-0.00205
461	-0.00117	-0.00098	0.000588	-0.00123	0.001565			461	-0.00546	-0.00162	-0.0021	-0.00428	-0.0022
462	-0.00026	-0.00027	0.000623	-0.0007	0.001639			462	-0.00409	-0.00337	-0.00233	-0.00354	-0.00239
463	-0.00137	-0.00114	0.000307	-0.00099	0.001574			463	-0.00487	-0.00248	-0.00207	-0.00369	-0.00153
464	-0.00075	-0.00087	0.000412	-0.00158	0.001267			464	-0.0046	-0.00257	-0.00128	-0.00377	-0.00187
465	-0.00117	-0.00045	0.0005	-0.00118	0.002077			465	-0.00503	-0.00315	-0.00184	-0.00413	-0.00172
466	-0.00106	-0.00068	0.000991	-0.00134	0.001974			466	-0.00485	-0.00173	-0.00154	-0.00418	-0.00133
467	-0.0013	-0.00161	0.000535	-0.00154	0.001229			467	-0.00453	-0.00281	-0.0021	-0.00381	-0.00201
468	-0.00196	-0.00177	-0.00022	-0.00134	0.001574			468	-0.00421	-0.00328	-0.00152	-0.00431	-0.00265
469	-0.00212	-0.00113	-8.8e-05	-0.00239	0.001164			469	-0.00395	-0.00294	-0.00243	-0.00367	-0.00217
470	1e-05	-0.00142	-0.00037	-0.00091	0.001509			470	-0.00478	-0.0035	-0.00125	-0.00345	-0.00235
471	-0.00035	-0.00057	-0.00011	-0.00101	0.000931			471	-0.0046	-0.00314	-0.00207	-0.00399	-0.0018
472	-0.00239	-0.00114	8.77e-06	-0.0018	0.000531			472	-0.00442	-0.00247	-0.00195	-0.00387	-0.00128
473	-0.00103	-0.00066	0.000237	-0.00138	0.001984			473	-0.0037	-0.00253	-0.00145	-0.00425	-0.00219
474	-0.00133	-0.00193	-0.00027	-0.00116	0.002123			474	-0.00423	-0.00325	-0.00239	-0.00343	-0.00174
475	-0.00149	-0.00114	0.000123	-0.00131	0.001145			475	-0.00444	-0.00291	-0.00122	-0.00416	-0.00128
476	-0.00146	0.001126	1.75e-05	-0.00078	0.001034			476	-0.00473	-0.00277	-0.00224	-0.00387	-0.00255
477	-0.00125	-0.00132	0.000132	-0.00168	0.002328			477	-0.0038	-0.00222	-0.00138	-0.00413	-0.00282
478	-0.0011	-7.6e-05	0.000246	-0.00174	0.000605			478	-0.00399	-0.00265	-0.00247	-0.00348	-0.00221
479	-0.0016	-0.0005	-0.00017	-0.00183	0.000736			479	-0.00396	-0.00292	-0.00198	-0.00391	-0.0023
480	-0.00156	-0.00159	-0.00086	-0.00188	0.000922			480	-0.00362	-0.00264	-0.00233	-0.00347	-0.00231
481	-0.00039	-0.001	-0.00061	-0.00138	0.001546			481	-0.00418	-0.00322	-0.002	-0.00381	-0.00231
482	-0.001	-0.00067	-0.00025	-0.00132	0.001257			482	-0.00437	-0.00346	-0.00163	-0.00391	-0.00175
483	-0.00125	-0.00064	-0.00067	-0.00089	0.001443			483	-0.00409	-0.00217	-0.0024	-0.003	-0.00206
484	-0.00064	-0.00162	-0.00034	-0.00144	0.001565			484	-0.00462	-0.00378	-0.00268	-0.00265	-0.00256
485	-0.00062	0.000677	-0.00017	-0.00041	0.001304			485	-0.00471	-0.00348	-0.00168	-0.00278	-0.00196
486	-0.00042	-0.00091	-0.00064	-0.00121	0.000847			486	-0.00409	-0.00283	-0.00243	-0.0037	-0.00215
487	-0.00122	-0.00072	-0.00063	-0.00169	0.001695			487	-0.00448	-0.00303	-0.00194	-0.00373	-0.00117
488	-0.00118	-0.00127	-9.6e-05	-0.00138	0.00109			488	-0.00426	-0.00278	-0.00139	-0.00382	-0.00238
489	-0.00184	-0.00093	-0.00103	-0.0011	0.0004			489	-0.00396	-0.00259	-0.00143	-0.00445	-0.00236
490	-0.00204	-0.00096	0.000675	-0.00131	0.001173			490	-0.00476	-0.00281	-0.0021	-0.00378	-0.0024
491	-0.00103	-3.8e-05	0.00121	-0.00112	0.00109			491	-0.00474	-0.00268	-0.00221	-0.00442	-0.00126
492	-0.002	-0.00077	-0.00015	-0.00131	0.001518			492	-0.00368	-0.00349	-0.002	-0.00439	-0.00287
493	-0.00012	0.000372	0.000561	-0.00171	0.001797			493	-0.00473	-0.00288	-0.00157	-0.00428	-0.00078
494	-0.00113	-0.00115	-0.00035	-0.00128	0.001788			494	-0.00394	-0.0034	-0.00302	-0.00382	-0.00196
495	-0.00039	-0.00101	-0.00056	-0.00105	0.000605			495	-0.0043	-0.00244	-0.00228	-0.00294	-0.00282
496	-0.00087	-0.00115	-0.00074	-0.00119	0.001183			496	-0.00459	-0.00282	-0.00149	-0.00356	-0.00241
497	-0.00194	-0.00089	-8.8e-05	-0.00138	0.001583			497	-0.00428	-0.00268	-0.00188	-0.00339	-0.00189
498	-0.00039	-0.00157	-0.00055	-0.00125	0.001108			498	-0.00418	-0.00319	-0.00214	-0.00406	-0.00163
499	-0.00096	-0.00145	-0.00091	-0.00054	0.001034			499	-0.00408	-0.00346	-0.00244	-0.0029	-0.00148
500	-0.00032	-0.00041	-0.00125	-0.0008	0.001285			500	-0.00415	-0.00257	-0.00179	-0.00486	-0.00245
501	0.0005	-0.00068	-0.0007	-0.00211	0.001239			501	-0.00407	-0.00196	-0.00099	-0.0029	-0.00285
502	-0.00132	0.000162	-2.6e-05	-0.00109	0.002039			502	-0.00481	-0.00269	-0.00233	-0.00384	-0.00234
503	-0.00151	-0.00198	-2.6e-05	-0.00092	0.001704			503	-0.00449	-0.00318	-0.00178	-0.00393	-0.00265
504	-0.00062	-0.00136	0.000298	-0.00139	0.000624			504	-0.00369	-0.0028	-0.00129	-0.00374	-0.00192
505	-0.00095	-0.00081	-0.00045	-0.00142	0.000866			505	-0.0043	-0.00285	-0.00296	-0.00331	-0.00308
506	-0.00042	-0.00115	-0.00044	-0.00143	0.001443			506	-0.00366	-0.00336	-0.00167	-0.004	-0.0023
507	0.00027	-9.5e-06	0.000184	-0.00121	0.000317			507	-0.0047	-0.00315	-0.00175	-0.0034	-0.00219
508	-0.00198	-0.00072	-0.00043	-0.00147	0.000503			508	-0.00476	-0.0032	-0.0019	-0.003	-0.00171
509	-0.00078	-0.00019	7.89e-05	-0.00097	0.000242			509	-0.00399	-0.00291	-0.00109	-0.00353	-0.00126
510	-0.00091	-0.00098	-0.00086	-0.00145	0.001192			510	-0.00406	-0.00277	-0.0016	-0.00331	-0.00167
511	0.00011	-0.00029	0.000193	-0.00064	0.000475			511	-0.00463	-0.00355	-0.00199	-0.00294	-0.00235
512	-0.0004	-0.00137	-0.00051	-0.00107	0.000885			512	-0.00471	-0.00315	-0.00207	-0.0028	-0.00185
513	-0.00126	-0.00149	-0.00127	-0.00093	0.001285			513	-0.0041	-0.00283	-0.00148	-0.00341	-0.00171
514	-0.00096	-0.00117	-0.00082	-0.00169	-0.00033			514	-0.00392	-0.00301	-0.00164	-0.0034	-0.00166
515	-0.00157	-0.00107	-0.0002	-0.00205	0.000382			515	-0.00424	-0.00255	-0.00182	-0.00352	-0.00212
516	-8e-05	-0.00106	-0.00043	-0.00118	-2.8e-05			516	-0.0048	-0.00309	-0.00286	-0.00413	-0.00173
517	-0.00017	-0.00179	-0.00018	-0.001	0.000382			517	-0.00343	-0.00336	-0.00113	-0.00331	-0.00255
518	-0.00154	-0.00093	-0.00017	-0.00049	0.001835			518	-0.00409	-0.00261	-0.00181	-0.00367	-0.00224
519	-0.00098	-0.00058	-0.00038	-0.00131	0.000885			519	-0.00348	-0.00388	-0.00247	-0.003	-0.00231
520	-0.00038	-0.00119	0.000588	-0.00146	0.000671			520	-0.00416	-0.00261	-0.00122	-0.00374	-0.00173
521	-0.00123	-0.00094	-0.00049	-0.0012	0.001201			521	-0.00334	-0.00312	-0.00216	-0.00336	-0.00145
522	-0.00012	-0.00069	0.000816	-0.00107	0.001099			522	-0.00426	-0.00292	-0.00212	-0.00448	-0.00219
523	-0.00038	-0.00051	6.14e-05	-0.00113	0.001313			523	-0.0037	-0.00261	-0.00149	-0.00316	-0.00255
524	-0.00092	-0.00056	-4.4e-05	-0.00069	0.001732			524	-0.00403	-0.00295	-0.0018	-0.00307	-0.00161
525	-0.00045	-0.00062	-0.00022	-0.0009	0.001313			525	-0.00426	-0.00296	-0.00158	-0.00247	-0.00185
526	0.00037	-0.00138	-0.00015	-0.00019	0.001155			526	-0.00417	-0.00342	-0.00222	-0.00378	-0.00209
527	-0.00114	-0.0008	-0.00044	-0.00166	0.000605			527	-0.00403	-0.00327	-0.00196	-0.00352	-0.00154
528	-0.00065	-0.00049	0.000816	-0.00186	0.000931			528	-0.00382	-0.00296	-0.00231	-0.00374	-0.00228
529	-0.00095	-0.00102	0.000289	-0.00079	0.001285			529	-0.0032	-0.00201	-0.00184	-0.00328	-0.00293
530	-0.00136	-0.00073	0.000149	-0.00116	0.000168			530	-0.00369	-0.0022	-0.00201	-0.00262	-0.00198
531	-0.00082	-0.00063	-0.00031	-0.00134	0.001155			531	-0.00419	-0.00256	-0.00169	-0.00316	-0.00183
532	-0.00174	-0.00107	0.000298	-0.00146	0.001322			532	-0.00401	-0.00322	-0.0017	-0.00352	-0.00219
533	-0.00034	-0.00145	0.000631	-0.00093	0.00081			533	-0.0029	-0.00296	-0.00135	-0.00378	-0.00194
534	-0.00104	-0.00014	0.00014	-0.0018	0.001201			534	-0.00438	-0.0034	-0.00169	-0.00414	-0.0022
535	8.01e-05	-0.00081	-0.00033	-0.00163	0.000941			535	-0.0042	-0.00214	-0.00132	-0.00322	-0.00252
536	-0.00092	-0.00102	-0.00079	-0.00034	0.001294			536	-0.003	-0.00259	-0.00064	-0.00352	-0.00142
537	-0.00085	-0.00088	-0.00038	-0.0015	0.000931			537	-0.00448	-0.00259	-0.00195	-0.00395	-0.00231
538	-0.00049	-0.00025	-0.00075	-0.00072	0.001099			538	-0.00398	-0.00225	-0.00082	-0.0033	-0.00172
539	-0.00122	-0.00206	-1.8e-05	-0.0012	0.000633			539	-0.00385	-0.00247	-0.00143	-0.00269	-0.00064
540	-0.00133	-0.00118	-0.00072	-0.0012	0.000605			540	-0.00362	-0.00271	-0.00141	-0.00441	-0.0017
541	2e-05	-0.00064	0.000219	-0.00212	0.000522			541	-0.00355	-0.00345	-0.00199	-0.00415	-0.00185
542	-0.00048	-0.00081	-0.00011	-0.00119	0.001546			542	-0.0033	-0.00203	-0.00167	-0.00371	-0.00209
543	-0.0018	-0.00053	2.63e-05	-0.0022	0.001676			543	-0.0034	-0.00345	-0.00156	-0.00392	-0.00185
544	-0.0003	-0.00016	-0.0008	-0.00189	0.001052			544	-0.00383	-0.00281	-0.00124	-0.00329	-0.00239
545	-0.00064	-0.00174	-0.0005	-0.00133	0.000969			545	-0.00364	-0.0026	-0.002	-0.0031	-0.0015
546	-0.00094	-0.00109	-5.3e-05	-0.00104	3.73e-05			546	-0.00354	-0.00292	-0.00146	-0.00452	-0.00226
547	-0.00054	-0.00081	-1.8e-05	-0.00112	0.001965			547	-0.0037	-0.00257	-0.00194	-0.00371	-0.00207
548	-0.00106	-0.00093	-0.00066	-0.0017	0.001388			548	-0.00345	-0.00273	-0.00145	-0.00332	-0.00224
549	-0.00074	-0.00014	-0.00125	-0.00093	0.000847			549	-0.00373	-0.00324	-0.00151	-0.00423	-0.00141
550	-0.00062	-0.00111	-0.00106	-0.00109	0.001118			550	-0.00406	-0.00321	-0.00131	-0.00384	-0.00214
551	-0.00072	-0.00076	-0.00015	-0.00142	0.000941			551	-0.00313	-0.00312	-0.00095	-0.00402	-0.00282
552	-0.00078	-0.00132	-0.00087	-0.00136	0.001006			552	-0.00367	-0.00252	-0.00265	-0.004	-0.0012
553	-0.0012	-0.00031	-0.00017	-0.00061	0.001062			553	-0.00404	-0.00336	-0.00091	-0.00435	-0.00204
554	0.00039	-0.00108	-0.00057	-0.00094	0.00068			554	-0.00405	-0.00331	-0.00124	-0.00395	-0.00151
555	-0.00095	-0.00078	-1.8e-05	-0.00045	9.31e-06			555	-0.00409	-0.00291	-0.00147	-0.00335	-0.00221
556	-0.00082	-0.00046	-0.00025	-0.00238	0.000205			556	-0.00442	-0.00309	-0.00135	-0.00312	-0.00125
557	-8e-05	-0.0008	-0.00075	-0.00071	0.001118			557	-0.00443	-0.00375	-0.00136	-0.00445	-0.00092
558	-0.00021	-0.00141	-0.00049	-0.00066	0.000922			558	-0.00342	-0.00353	-0.00174	-0.00336	-0.00262
559	-0.00087	-0.00133	-0.0011	-0.00082	5.59e-05			559	-0.00356	-0.00298	-0.00096	-0.00372	-0.00135
560	0.00017	-0.00067	-0.00084	-0.00093	0.000549			560	-0.00293	-0.00279	-0.00124	-0.00323	-0.00187
561	-0.00118	-0.00115	0.000333	-0.00078	0.002161			561	-0.00308	-0.00315	-0.0022	-0.00414	-0.002
562	-0.00021	-0.00149	-0.00036	-0.0007	0.001294			562	-0.00409	-0.00262	-0.00069	-0.00364	-0.00161
563	0.00019	-0.00072	-0.00049	-0.00051	0.000913			563	-0.00392	-0.00241	-0.0021	-0.00433	-0.00153
564	0.00011	-0.00115	-0.00066	-0.00045	0.000941			564	-0.00386	-0.00303	-0.0016	-0.00454	-0.00193
565	0.0001	-0.00114	-0.00176	-0.00071	0.000112			565	-0.00327	-0.0032	-0.00148	-0.00337	-0.00202
566	-0.00015	-0.00067	-0.00074	-0.00208	0.0004			566	-0.00342	-0.00219	-0.00127	-0.00348	-0.00135
567	-0.0007	0	-0.00036	-0.00147	0.000773			567	-0.00336	-0.00307	-0.00137	-0.00387	-0.00146
568	-0.00031	-0.00156	-0.00096	-0.00169	0.000764			568	-0.00336	-0.00366	-0.00064	-0.0032	-0.00119
569	0.00016	-0.00082	-0.00127	-0.00177	0.000959			569	-0.00385	-0.0022	-0.0013	-0.00324	-0.00123
570	-0.00041	-0.00068	-0.00044	-0.00134	0.00122			570	-0.00329	-0.00158	-0.0007	-0.00343	-0.00197
571	-0.00069	-0.00071	-0.0005	-0.00082	0.000568			571	-0.00259	-0.00212	-0.00147	-0.00444	-0.00232
572	-0.00105	-7.6e-05	-0.00064	-0.00102	0.001797			572	-0.0037	-0.00385	-0.00161	-0.00334	-0.00139
573	-3e-05	-0.00107	-0.00079	-0.00114	0.002337			573	-0.00371	-0.00287	-0.00195	-0.00364	-0.00155
574	-0.00075	-0.00122	-0.00037	-0.0013	9.31e-06			574	-0.00354	-0.0025	-0.00144	-0.00392	-0.00155
575	-0.00092	-0.0013	-0.00111	-0.00133	0.001788			575	-0.00423	-0.00265	-0.00137	-0.00314	-0.0022
576	-0.00105	-0.00202	-0.00103	-0.00098	0.001425			576	-0.00392	-0.00227	-0.00168	-0.00367	-0.00167
577	-0.00033	-0.00126	-0.00058	-0.0013	3.73e-05			577	-0.00312	-0.00207	-0.00174	-0.00335	-0.00155
578	0.00069	-0.00069	-0.00046	-0.00116	0.002058			578	-0.00296	-0.00317	-0.00158	-0.00278	-0.0019
579	-0.00043	-0.00114	-0.00056	-0.00133	0.001118			579	-0.00288	-0.00252	-0.00112	-0.00352	-0.00147
580	-0.00167	-0.00088	-0.00086	-0.00049	0.00082			580	-0.00363	-0.00271	-0.00183	-0.00427	-0.00166
581	-0.00023	-0.00051	-0.00041	-0.00131	0.001257			581	-0.004	-0.00229	-0.00146	-0.00382	-0.00218
582	-0.00069	-0.00124	0.000158	-0.00176	0.001034			582	-0.00318	-0.00333	-0.00157	-0.00323	-0.00176
583	-0.00035	-0.00171	-0.0002	-0.00108	0.000596			583	-0.00349	-0.00313	-0.00154	-0.0031	-0.00137
584	-0.0006	-0.00068	-0.00082	-0.00194	0.001443			584	-0.00373	-0.00247	-0.00101	-0.00308	-0.00179
585	-0.00102	-0.00063	-0.00045	-0.00021	0.001118			585	-0.00369	-0.00299	-0.00232	-0.00355	-0.00121
586	-0.0006	-0.0004	-0.00169	-0.00098	0.000214			586	-0.00272	-0.00261	-0.00187	-0.00361	-0.0024
587	-0.00169	0.000391	-0.00058	-0.00113	0.000251			587	-0.00265	-0.00266	-0.00139	-0.00314	-0.00154
588	-0.00058	-0.00073	-0.00082	-0.00136	0.000177			588	-0.00337	-0.00309	-0.00159	-0.00318	-0.00105
589	0.00013	-0.00073	0.000938	-0.00128	0.001388			589	-0.0031	-0.0029	-0.00232	-0.00254	-0.00256
590	-0.00046	-0.00119	0.000316	-0.00088	0.001099			590	-0.004	-0.00273	-0.00119	-0.00293	-0.00228
591	-0.00047	-0.00152	-0.00055	-0.00116	0.001015			591	-0.00306	-0.00271	-0.00088	-0.00289	-0.00091
592	-0.00019	-0.00068	-0.00047	-0.00116	0.000838			592	-0.00318	-0.00247	-0.00172	-0.0033	-0.00157
593	0.00029	-0.0011	-0.00049	-0.00165	0.000261			593	-0.00292	-0.00284	-0.00129	-0.00335	-0.00148
594	4e-05	-0.00074	-0.00123	-0.00182	0.000373			594	-0.00282	-0.00281	-0.00126	-0.00316	-0.00167
595	4e-05	-0.00093	-0.00036	-0.00127	0.001043			595	-0.00327	-0.0024	-0.00133	-0.00396	-0.00187
596	-0.00016	-0.00108	0.000351	-0.00099	0.001164			596	-0.00261	-0.00212	-0.0017	-0.00254	-0.00286
597	3e-05	-0.00134	-0.00062	-0.00205	0.001276			597	-0.00355	-0.00304	-0.00082	-0.0037	-0.00216
598	0.00011	-0.00122	0.000658	-0.00083	0.000959			598	-0.00297	-0.00244	-0.00105	-0.00304	-0.00201
599	-0.00014	-0.00159	-0.00096	-0.00081	0.00041			599	-0.00356	-0.00265	-0.0019	-0.00297	-0.0022
600	-0.00106	-0.00033	-0.0013	-0.00131	0.000158			600	-0.00378	-0.00247	-0.00133	-0.00255	-0.00159
601	0.000931	-0.00077	-0.00061	-0.00201	-0.00029			601	-0.00373	-0.00319	-0.00153	-0.00264	-0.00167
602	0.00041	-0.00124	0.000237	-0.00156	0.000987			602	-0.00337	-0.00353	-0.00171	-0.00311	-0.00203
603	-0.0009	-0.00052	0.000447	-0.00144	0.001136			603	-0.00286	-0.00253	-0.00116	-0.00276	-0.00186
604	-9e-05	-0.00126	-0.00028	-0.00195	5.59e-05			604	-0.00271	-0.00269	-0.00115	-0.00276	-0.00235
605	-0.00025	-0.00042	-0.00099	-0.00131	0.000326			605	-0.00275	-0.00253	-0.00092	-0.00414	-0.00198
606	-0.00112	-0.00072	-2.6e-05	-0.00182	0.001537			606	-0.00308	-0.00356	-0.00083	-0.00236	-0.00148
607	0.00023	-0.00048	-4.4e-05	-0.0019	0.000363			607	-0.00288	-0.0032	-0.00064	-0.00306	-0.00199
608	0.001021	-0.00059	-0.00049	-0.00132	0.000382			608	-0.00257	-0.00245	-0.00168	-0.00367	-0.00145
609	0.00019	-0.00107	-0.00042	-0.00183	0.001695			609	-0.00223	-0.00239	-0.002	-0.003	-0.00171
610	0.00018	-0.0011	-0.00065	-0.00111	0.001434			610	-0.00285	-0.00228	-0.00162	-0.00346	-0.00153
611	-4e-05	-0.00153	0.000272	-0.00149	0.001015			611	-0.00343	-0.00232	-0.00186	-0.00363	-0.00119
612	0.00023	-0.00053	-0.00048	-0.00124	0.000885			612	-0.00223	-0.00269	-0.00109	-0.00342	-0.00196
613	-0.00073	-0.00056	-0.00108	-0.00114	0.001211			613	-0.00275	-0.00283	-0.0006	-0.00406	-0.00226
614	3e-05	-0.00136	-0.00056	-0.00097	0.000168			614	-0.00299	-0.00332	-0.00221	-0.00344	-0.00167
615	-0.00089	-0.00157	-0.00104	-0.00171	0.002058			615	-0.00266	-0.00245	-0.00162	-0.00356	-0.00194
616	0.00022	-0.00149	-0.00049	-0.00151	0.000754			616	-0.00367	-0.0023	-0.0011	-0.00285	-0.00127
617	7e-05	-0.00072	-0.00133	-0.00108	0.000168			617	-0.00343	-0.00224	-0.00191	-0.00247	-0.00214
618	0.00043	-0.00115	-0.00027	-0.00146	0.000214			618	-0.00262	-0.00297	-0.00115	-0.00256	-0.0018
619	0.00043	-0.0014	-0.00041	-0.00123	0.001406			619	-0.00333	-0.00322	-0.00077	-0.00201	-0.001
620	-0.00023	-0.00143	-0.00082	-0.00162	0.001611			620	-0.00412	-0.0015	-0.0012	-0.00331	-0.00179
621	0.00067	-0.00063	-0.001	-0.00211	0.000633			621	-0.00324	-0.00225	-0.00159	-0.00287	-0.00279
622	5e-05	-0.00108	-0.00137	-0.00161	0.000941			622	-0.00295	-0.00258	-0.00135	-0.0021	-0.00164
623	0.00048	-0.0004	-0.00125	-0.00186	0.000615			623	-0.00391	-0.00254	-0.00098	-0.00239	-0.00091
624	1e-05	-0.00135	-0.00051	-0.00054	7.45e-05			624	-0.00325	-0.00245	-0.0007	-0.00253	-0.00208
625	-0.00053	-0.00098	-0.00123	-0.00161	0.000605			625	-0.00318	-0.00242	-0.00115	-0.00251	-0.00214
626	-0.00017	-0.00127	-0.00016	-0.00176	0.000792			626	-0.00313	-0.0028	-0.00131	-0.00263	-0.00224
627	-0.00016	-0.00073	-0.00059	-0.00118	0.000438			627	-0.00208	-0.00196	-0.00167	-0.00312	-0.00224
628	0.0007	-0.00028	-0.00096	-0.00079	0.000391			628	-0.00252	-0.00339	-0.001	-0.00356	-0.00192
629	0.00028	-0.00079	-0.00098	-0.00174	0.000205			629	-0.003	-0.00262	-0.00056	-0.00251	-0.00146
630	0.00038	-0.00108	-0.00072	-0.00157	-0.00054			630	-0.00304	-0.00219	-0.00092	-0.0026	-0.00202
631	-0.00037	-0.00031	-0.0005	-0.00168	-0.00019			631	-0.00299	-0.0027	-0.00127	-0.00201	-0.00302
632	3e-05	-0.00176	-0.00055	-0.00265	-2.8e-05			632	-0.00369	-0.00351	-0.00069	-0.0026	-0.0019
633	0.001111	-0.00125	-0.00056	-0.00167	0.000764			633	-0.00305	-0.00261	-0.00055	-0.00331	-0.0018
634	0.00043	-0.00087	-0.00053	-0.00155	0.000708			634	-0.00292	-0.00312	-0.00102	-0.00361	-0.00216
635	5e-05	-0.00058	-0.00056	-0.00161	0.000475			635	-0.00344	-0.00296	-0.00086	-0.00282	-0.00243
636	0.00073	-0.00084	-0.00141	-0.00101	0.001015			636	-0.00332	-0.00198	-0.00094	-0.00248	-0.00205
637	0.00021	-0.00126	-0.00158	-0.00064	0.00041			637	-0.00303	-0.00191	-0.00141	-0.00287	-0.00167
638	0.001241	-0.00132	-0.00053	-0.00165	0.00109			638	-0.00321	-0.00267	-0.00115	-0.00232	-0.00236
639	0.001791	-0.00025	-0.00086	-0.00157	0.000317			639	-0.0037	-0.00257	-0.00104	-0.00273	-0.0015
640	0.00018	-0.0009	-0.00055	-0.00127	0.00109			640	-0.00403	-0.00187	-0.00068	-0.00328	-0.00172
641	0.00014	0.000105	-0.00075	-0.00126	-9.3e-05			641	-0.00325	-0.00239	-0.00036	-0.00261	-0.00196
642	0.00061	-0.00054	-0.00068	-0.00146	0.000456			642	-0.00304	-0.00212	-0.00054	-0.00285	-0.00173
643	0.00068	-0.0007	-0.00057	-0.00146	0.00081			643	-0.00327	-0.00315	-0.00071	-0.00189	-0.0018
644	0.00051	-0.0009	-0.00018	-0.00122	-0.00034			644	-0.00311	-0.0033	-0.00144	-0.00277	-0.00169
645	0.00052	-0.00136	-0.0004	-0.00108	9.31e-06			645	-0.00359	-0.00369	-0.00089	-0.0033	-0.00194
646	0.00063	-0.00091	-0.00162	-0.00213	-0.00016			646	-0.00367	-0.00178	-0.00082	-0.00234	-0.00201
647	0.00074	-0.0009	-0.00093	-0.0018	3.73e-05			647	-0.00315	-0.00236	-0.00122	-0.00268	-0.00241
648	0.00051	-0.00114	-0.00152	-0.00147	-0.00011			648	-0.00329	-0.00281	-0.00145	-0.00335	-0.00228
649	0.001171	-0.00088	-0.00168	-0.00152	0.000456			649	-0.00391	-0.00336	7.81e-05	-0.00347	-0.00177
650	0.001311	-0.00072	-0.00158	-0.00188	0.000242			650	-0.00385	-0.00213	-3.5e-05	-0.00247	-0.00201
651	0.00073	-0.00025	-0.00107	-0.00105	-5.6e-05			651	-0.00205	-0.00347	-0.00138	-0.0037	-0.00284
652	0.00065	-0.00062	-0.00207	-0.00197	0.00041			652	-0.00324	-0.00196	-0.00059	-0.0028	-0.00154
653	3e-05	-0.00111	-0.00107	-0.00204	0.000903			653	-0.00249	-0.00276	-0.00089	-0.00352	-0.0031
654	-0.00034	0.000162	-0.00041	-0.00183	0.000177			654	-0.00326	-0.00309	-0.00104	-0.00263	-0.00236
655	0.001751	-0.00065	-0.00091	-0.00124	-0.00061			655	-0.00229	-0.00185	-0.00096	-0.00253	-0.00133
656	0.00057	-0.00072	-0.00142	-0.00117	0.000512			656	-0.00246	-0.00207	-0.00088	-0.00339	-0.00152
657	0.001011	-0.00125	-0.00032	-0.00165	0.000633			657	-0.00254	-0.00281	-0.00205	-0.00232	-0.00205
658	0.00034	-0.00078	-0.00101	-0.00163	-6.5e-05			658	-0.00202	-0.00225	-0.00051	-0.00314	-0.00196
659	0.000851	-0.00049	-0.00096	-0.00105	0.000335			659	-0.00208	-0.00252	-0.00164	-0.00277	-0.00185
660	-0.00034	-0.00072	-0.00128	-0.00174	-0.00029			660	-0.00322	-0.00267	-0.00092	-0.00238	-0.00137
661	0.000941	-0.00084	-0.00046	-0.00118	3.73e-05			661	-0.0031	-0.00296	-0.00065	-0.00293	-0.00153
662	0.00066	-0.00115	-0.00117	-0.00102	-0.00129			662	-0.0022	-0.00252	-0.00076	-0.00273	-0.00075
663	5e-05	-0.00103	-0.00084	-0.00153	0.000121			663	-0.00247	-0.00217	-0.0004	-0.00274	-0.00199
664	0.001241	-0.00076	-0.00061	-0.00103	-0.00022			664	-0.00325	-0.00306	-0.00125	-0.0022	-0.00119
665	0.00053	-0.0021	0	-0.00146	0.000484			665	-0.00165	-0.0031	-0.00074	-0.00253	-0.00169
666	0.00045	0.000134	-0.00105	-0.00019	-0.00032			666	-0.00368	-0.00291	-0.00076	-0.00275	-0.00157
667	0.00076	-0.0003	-0.00096	-0.00032	-0.00013			667	-0.00213	-0.0035	-0.00107	-0.00198	-0.00158
668	0.000871	-0.00102	-0.00125	-0.00135	-0.00023			668	-0.00206	-0.00314	-0.0012	-0.0028	-0.00244
669	0.00062	-0.00037	-0.00029	-0.00049	-0.00074			669	-0.0026	-0.00276	-0.00057	-0.00263	-0.00196
670	0.00069	-0.00082	-0.00044	-0.00093	-0.00065			670	-0.00265	-0.00333	-0.00075	-0.00251	-0.00184
671	0.00053	0.000372	0.000368	-0.00176	-0.00015			671	-0.00257	-0.00261	-0.00037	-0.0026	-0.00241
672	0.00025	-0.0014	-0.00124	-0.00108	0.001024			672	-0.00195	-0.00143	0.000182	-0.00265	-0.00244
673	0.000831	-0.00039	-0.00118	-0.00087	0.000196			673	-0.00295	-0.00238	-0.00032	-0.00289	-0.00087
674	0.00058	9.54e-06	-0.00127	-0.0019	0.000289			674	-0.00282	-0.00282	-0.00153	-0.00251	-0.00217
675	0.001461	-0.0007	-0.00086	-0.00213	-0.00081			675	-0.00182	-0.00319	-0.00099	-0.00205	-0.00204
676	0.00075	-0.00038	-0.00176	-0.00053	-0.00041			676	-0.00245	-0.00227	-0.00095	-0.00302	-0.00203
677	0.00035	-0.00036	-0.00046	-0.00078	-0.00061			677	-0.00212	-0.00245	-0.00108	-0.00269	-0.00166
678	0.000901	-0.00043	-0.00132	-0.00104	0.000112			678	-0.00229	-0.00233	-0.00049	-0.00215	-0.00161
679	0.0005	-0.00033	-0.00096	-0.00095	-0.00101			679	-0.00227	-0.00216	-8.7e-05	-0.00344	-0.00131
680	0.001261	0.000105	-0.00126	-0.00052	0.000522			680	-0.00242	-0.00237	-0.00039	-0.00338	-0.00221
681	0.000911	-0.00021	-0.00075	-0.00133	-0.00039			681	-0.00259	-0.00288	-0.00059	-0.00103	-0.00128
682	0.00072	-0.00079	-0.00089	-0.00079	0.000512			682	-0.00263	-0.00237	-0.00036	-0.00314	-0.00088
683	0.001081	-0.00035	-0.00043	-0.00094	0.000475			683	-0.00224	-0.00271	-0.00141	-0.00275	-0.00147
684	0.001011	-0.00074	-0.00125	-0.00141	-0.00061			684	-0.00282	-0.00191	-0.00023	-0.00227	-0.00105
685	0.001261	-0.00055	-0.00059	-0.0019	-0.00058			685	-0.00154	-0.00197	-0.00071	-0.00261	-0.00201
686	0.00058	-0.00055	-8.8e-05	-0.00092	-0.00091			686	-0.00235	-0.00241	-0.00034	-0.00293	-0.00115
687	0.001841	-0.00112	-0.00098	-0.00192	0.001201			687	-0.00182	-0.00159	-0.00079	-0.00225	-0.00134
688	0.000981	-0.00058	-0.00078	-0.00168	0.000615			688	-0.00106	-0.00251	-0.00145	-0.00276	-0.00117
689	0.00037	-0.00111	-0.00086	-0.00155	0.000373			689	-0.00262	-0.00237	1.74e-05	-0.0026	-0.00101
690	0.00011	-0.00015	-0.00069	-0.00114	0.000279			690	-0.00221	-0.00186	-0.00083	-0.00242	-0.0018
691	0.001161	-0.00093	-0.00069	-0.00049	0.000447			691	-0.0027	-0.00227	-0.00049	-0.00152	-0.00176
692	0.001191	0	-0.00091	-0.00101	0.000466			692	-0.00252	-0.00193	-0.00095	-0.00237	-0.00088
693	0.00031	-0.00114	-0.00064	-0.00082	-0.00033			693	-0.00268	-0.00165	-0.00102	-0.00241	-0.00129
694	0.00046	-0.00087	-0.00038	-0.00152	-5.6e-05			694	-0.00155	-0.00227	-0.00013	-0.00159	-0.00192
695	0.001371	-0.0004	-0.00059	-0.00018	0.000112			695	-0.00228	-0.00252	-0.00061	-0.00326	-0.00178
696	0.001031	-0.00076	-0.00099	-0.00131	-0.00112			696	-0.00175	-0.0024	-0.00154	-0.00276	-0.00147
697	0.00057	-0.00144	-0.00048	-0.00109	0.000838			697	-0.00171	-0.00283	-0.00173	-0.00312	-0.00138
698	0.000941	-0.00053	-0.00145	-0.00095	0.000875			698	-0.00194	-0.00236	-0.00059	-0.00302	-0.00155
699	0.00034	-0.00019	-0.00031	-0.00114	-0.00047			699	-0.00291	-0.00247	-0.00037	-0.00337	-0.00071
700	9.01e-05	-0.00093	-0.00067	-0.0016	0.000745			700	-0.00169	-0.00247	-0.00108	-0.00232	-0.00118
701	0.000841	-0.00089	-0.00079	-0.00137	0.000354			701	-0.00232	-0.00227	-0.0015	-0.00307	-0.00149
702	-0.00018	-0.00179	-0.00137	-0.00107	-0.00051			702	-0.00142	-0.00241	-0.00194	-0.00312	-0.00176
703	0.001371	5.72e-05	-0.00068	-0.00097	-0.00023			703	-0.002	-0.00184	-0.00131	-0.00293	-0.002
704	0.001451	-0.00055	-0.00075	-0.0019	0.000289			704	-0.002	-0.00184	-0.0008	-0.00262	-0.00164
705	0.00011	-0.00117	-0.00177	-0.00124	-0.00021			705	-0.00201	-0.00257	-0.00089	-0.00247	-0.00178
706	0.001071	-0.00196	-0.00076	-0.00079	0.000624			706	-0.00161	-0.00149	0.0002	-0.00182	-0.00207
707	0.000881	-0.00081	-0.00123	-0.00129	9.31e-05			707	-0.00242	-0.00237	-0.00042	-0.00259	-0.00107
708	0.00074	-0.00075	-0.00028	-0.00205	0.000652			708	-0.00187	-0.00215	-0.00093	-0.00217	-0.00189
709	0.00072	0.000286	-8.8e-06	-0.00052	0.000559			709	-0.00225	-0.00159	-0.00128	-0.00259	-0.00246
710	0.000991	-0.00052	-5.3e-05	-0.00202	-0.0002			710	-0.00176	-0.00227	-0.00163	-0.0028	-0.00146
711	-0.00028	-0.00011	-0.00068	-0.00194	0.000419			711	-0.0011	-0.00166	-0.00205	-0.00206	-0.00223
712	9.01e-05	-0.00084	-0.00125	-0.00092	0.000121			712	-0.00135	-0.00195	-0.00076	-0.00253	-0.00067
713	-0.00018	-0.00179	-0.00111	-0.00202	-0.00014			713	-0.00253	-0.0015	-0.00064	-0.00267	-0.00136
714	0.001011	-0.00085	-0.00119	-0.00163	0.00054			714	-0.00147	-0.00217	-0.00065	-0.00232	-0.00138
715	0.000861	0.000105	-0.00074	-0.00078	-0.00141			715	-0.00215	-0.0023	-0.00038	-0.00191	-0.00126
716	0.001471	9.54e-05	-0.00123	-0.00125	0.00013			716	-0.00226	-0.00154	-0.00096	-0.00241	-0.0011
717	0.002051	-0.00189	-0.00035	-0.00082	-0.00055			717	-0.00158	-0.00198	0.000104	-0.00301	-0.0015
718	-0.00048	-0.00125	-0.00137	-0.0006	0.000177			718	-0.00235	-0.00204	-0.00055	-0.00264	-0.00108
719	0.000891	-0.00134	-0.00157	-0.00208	-0.00022			719	-0.00125	-0.00114	-0.00119	-0.00307	-0.00138
720	0.001721	-0.00195	-0.00153	-0.00131	0.000196			720	-0.00167	-0.00191	-0.00079	-0.00217	-0.00113
721	0.000931	-0.00082	-0.00091	-0.00101	0.000307			721	-0.00187	-0.00281	-0.00042	-0.0014	-0.00194
722	0.00037	-0.00131	-0.00108	-0.00079	-8.4e-05			722	-0.00158	-0.00247	-0.00108	-0.00217	-0.00143
723	0.000801	-0.0014	-0.00097	-0.00034	-0.00034			723	-0.00209	-0.00163	-0.00119	-0.00311	-0.00166
724	0.001091	-4.8e-05	-0.00092	-0.00079	0.000345			724	-0.00192	-0.00252	-0.00021	-0.00284	-0.00213
725	0.00061	1.91e-05	-0.00064	-0.00159	0.000587			725	-0.00251	-0.00252	-0.0005	-0.00136	-0.00117
726	0.001971	0.000143	0.000219	-0.00121	-0.00062			726	-0.00151	-0.00225	-0.00098	-0.00274	-0.00084
727	0.000911	-0.0017	-0.00136	-0.00098	-4.7e-05			727	-0.00226	-0.00252	-0.0007	-0.00176	-0.002
728	0.001321	-0.00055	-0.00039	-0.00131	0.000196			728	-0.00186	-0.00159	-0.00062	-0.00175	-0.0012
729	0.001441	-0.00045	0.000649	-0.00029	0.000335			729	-0.00158	-0.00269	-0.00088	-0.00255	-0.00176
730	4e-05	-0.00168	-0.00111	-0.00071	0.000242			730	-0.00254	-0.0017	-0.0002	-0.00292	-0.00255
731	0.00054	-0.00105	-0.00063	-0.00165	8.38e-05			731	-0.00184	-0.00148	-0.0006	-0.00228	-0.00214
732	0.000811	-0.00059	-0.00046	-0.00073	0.000158			732	-0.00221	-0.00172	-0.0012	-0.00193	-0.00091
733	0.00068	-0.00165	-0.00089	-0.00155	0.00013			733	-0.00139	-0.00154	-0.00051	-0.00191	-0.00194
734	0.00065	-0.00074	-0.0014	-0.0007	-0.00044			734	-0.0027	-0.00159	-0.00038	-0.00289	-0.00153
735	-0.00049	0.000143	-0.00097	-0.00118	0.000568			735	-0.00178	-0.00142	-0.00118	-0.00167	-0.00078
736	0.00063	-0.00123	-0.00086	-0.00108	0.000391			736	-0.00153	-0.00123	-3.5e-05	-0.00238	-0.00161
737	0.002261	-0.00117	-0.00083	-0.00142	-0.0007			737	-0.00252	-0.00226	-1.7e-05	-0.00221	-0.00127
738	-0.00025	-0.00084	-0.00076	-0.00128	-8.4e-05			738	-0.00218	-0.00199	0.000217	-0.00138	-0.00201
739	0.00071	-0.00093	0.000263	-0.00088	-0.0005			739	-0.00141	-0.00127	-0.00099	-0.0025	-0.00211
740	0.000791	-0.00155	-0.00124	-0.00033	0.000168			740	-0.00248	-0.00247	-0.00082	-0.00219	-0.00149
741	0.001601	-0.00124	-0.00186	-0.00071	0.000456			741	-0.00117	-0.00145	-0.00101	-0.00248	-0.00133
742	0.00074	-0.00217	-0.00118	-0.00181	0.000764			742	-0.0018	-0.002	-0.00076	-0.00211	-0.0011
743	0.001511	-0.00058	-0.00082	-0.00109	-0.00013			743	-0.00197	-0.0012	-0.00049	-0.00295	-0.00138
744	0.00049	-0.00151	-0.00117	-0.00155	-0.00037			744	-0.00155	-0.00149	-0.00136	-0.00175	-0.00183
745	0.001361	-0.00016	-0.00057	-0.00181	-0.00053			745	-0.00205	-0.00165	-0.00115	-0.00251	-0.00081
746	0.001441	-0.00141	-0.00143	-0.0009	0.000941			746	-0.00096	-0.00158	-0.00082	-0.00197	-0.00199
747	0.00069	-0.00128	-0.00041	-0.00142	-0.00107			747	-0.00046	-0.00158	8.68e-05	-0.00168	-0.00163
748	2e-05	-0.0007	-0.00071	-0.0007	-0.00021			748	-0.00207	-0.00079	-0.00103	-0.00246	-0.00146
749	0.002131	-0.00095	-0.00127	-0.00061	-0.00084			749	-0.00194	-0.00159	-0.00104	-0.0024	-0.00107
750	0.000891	-0.00053	-0.0011	-0.00062	-0.00036			750	-0.00191	-0.00118	-0.00076	-0.0026	-0.00187
751	-6e-05	-0.0007	-0.00031	-0.00064	-0.00034			751	-0.00177	-0.00169	-0.00143	-0.00225	-0.00146
752	0.001591	-0.00127	-0.00035	-0.00131	-0.00026			752	-0.00155	-0.00161	-0.00022	-0.00178	-0.00178
753	0.001691	-0.00104	-0.00012	-0.00057	0.000363			753	-0.00148	-0.0011	-0.00056	-0.00159	-0.00119
754	0.001071	-0.00078	-0.00025	-0.0017	-6.5e-05			754	-0.0018	-0.00156	-0.00036	-0.0014	-0.00155
755	0.001561	-0.00083	-0.001	-0.00018	0.000615			755	-0.00168	-0.00139	-0.00099	-0.00139	-0.00206
756	0.001321	-0.00157	-0.00078	-0.00117	0.000568			756	-0.00187	-0.00115	-0.00094	-0.00213	-0.00125
757	0.000881	-0.00146	-0.00019	-0.00123	0.000279			757	-0.00247	-0.00196	-0.00063	-0.00217	0.000174
758	0.00063	-0.00139	-0.00073	-0.00126	0.000121			758	-0.00212	-0.00253	-0.00109	-0.00223	-0.00126
759	0.00057	-0.00082	-0.00138	-0.00086	0.000466			759	-0.00226	-0.00144	-0.00141	-0.00202	-0.00164
760	0.001501	-0.00153	-0.00095	-0.00073	-0.00023			760	-0.00094	-0.00081	-0.00065	-0.00221	-0.00116
761	0.001421	-0.00067	-0.00067	-0.00133	-0.00072			761	-0.00035	-0.00154	-0.00071	-0.00258	-0.00102
762	0.001801	-0.00093	-6.1e-05	-0.00077	-0.00011			762	-0.00099	-0.00119	-0.00073	-0.0024	-0.00142
763	0.00059	-0.00046	0.000228	-0.00069	-0.00038			763	-0.00099	-0.001	-0.00074	-0.00214	-0.00167
764	0.00062	-0.00058	-0.00049	-0.00107	0.000307			764	-0.00102	-0.00111	4.34e-05	-0.00198	-0.00099
765	0.000841	-0.00086	-0.00017	-0.00122	-0.00029			765	-0.00178	-0.00182	-0.00068	-0.00208	-0.00085
766	0.001191	-0.00081	-0.00025	-0.00062	0.000633			766	-0.00139	-0.00152	-0.00102	-0.00179	-0.0012
767	0.002171	-0.00072	-0.00018	-0.00071	2.79e-05			767	-0.00172	-0.00151	-0.00083	-0.00244	-0.00138
768	0.001111	-0.00122	-0.00173	-0.00084	-0.00058			768	-0.00125	-0.00187	-0.00161	-0.00313	-0.00151
769	0.002071	-0.00117	-0.00099	-0.00064	-0.00034			769	-0.00174	-0.00179	-0.00046	-0.00217	-0.00091
770	0.002191	-0.00089	-0.00055	-0.00108	-0.00044			770	-0.00151	-0.00178	-0.0003	-0.00251	-0.00105
771	0.00068	-0.00109	-0.00018	-0.00109	-0.0004			771	-0.00077	-0.00116	-0.00129	-0.00266	-0.00109
772	0.000881	-0.00181	-0.00141	-0.00111	-0.00022			772	-0.001	-0.00124	-0.0008	-0.00275	-0.00105
773	0.000971	-0.00069	-0.00119	-0.00046	-0.00067			773	-0.00034	-0.00217	-0.00097	-0.00168	-0.00148
774	0.000781	-0.00082	-0.00113	-0.00121	-0.00048			774	-0.0016	-0.00098	-0.00082	-0.00207	-0.00166
775	0.001121	-0.00139	-0.00146	-0.00107	0.000484			775	-0.00121	-0.00146	-0.00068	-0.00204	-0.00186
776	0.001551	-0.00079	-0.00125	-0.00082	-0.00019			776	-0.00116	-0.00088	-0.00155	-0.0023	-0.00115
777	0.001871	-0.00059	-0.00139	-0.00062	-0.00108			777	-0.00135	-0.00105	-0.00085	-0.00254	-0.00184
778	0.001961	-0.00108	-0.00138	-0.001	-0.00045			778	-0.00101	-0.00164	-0.00125	-0.0024	-0.00095
779	0.001051	-0.00153	-0.00122	-0.00089	-7.5e-05			779	-0.00111	-0.00161	-0.00091	-0.00275	-0.00053
780	0.001071	-0.00075	-0.00043	-0.00056	-0.00035			780	-0.00045	-0.00123	-0.00062	-0.00197	-0.00069
781	0.00033	-0.00114	-0.00113	-0.00144	-0.00028			781	-0.00064	-0.00147	-0.0003	-0.00162	-0.00078
782	0.000821	-0.00072	-0.00125	-0.00108	0.000102			782	-0.00133	-0.00109	-0.00103	-0.00242	-0.00035
783	0.001721	-0.00117	-0.00062	-0.00014	0.000279			783	-0.00137	-0.00175	-0.00064	-0.00133	-0.00142
784	0.00053	-0.00064	-0.00124	-0.00071	0.000559			784	-0.00168	-0.00207	-0.0007	-0.00202	-0.00125
785	0.00045	-0.00158	-0.00079	-0.00041	0.000373			785	-0.00091	-0.0018	-0.00085	-0.00226	-0.00143
786	0.001321	-0.00109	-0.0007	-0.00163	-2.8e-05			786	-0.00169	-0.00193	0.000208	-0.00216	-0.0015
787	0.00043	-0.00059	-0.00158	-0.00093	-0.00012			787	-0.00052	-0.00123	0.000226	-0.00194	-0.00105
788	0.002121	-0.00077	-0.00172	-0.00146	0.00013			788	-0.00063	-0.00133	-0.00044	-0.00171	-0.00104
789	0.001271	-0.00044	-0.00139	-0.00172	-0.00074			789	-0.00193	-0.00137	-0.00106	-0.00115	-0.00076
790	0.000831	-0.00076	-0.00108	-0.00144	0.000475			790	-0.00135	-0.00196	-0.00012	-0.00178	-0.0016
791	0.001441	-0.00107	-0.00135	-0.00105	-0.00109			791	-0.00159	-0.00098	-0.0009	-0.00201	-0.00114
792	0.001501	-0.00051	-0.00118	-0.00078	-6.5e-05			792	-0.00077	-0.00151	-0.00112	-0.00112	-0.00167
793	0.001071	-0.00063	-0.00086	-0.00097	0.000196			793	-0.00162	-0.00111	-0.00107	-0.00154	-0.00148
794	-0.0001	-0.00097	-0.00135	-0.00076	-0.00035			794	-0.00178	-0.001	-0.00032	-0.00176	-0.00043
795	0.001171	-0.00054	-0.00068	-0.00099	-2.8e-05			795	-0.00204	-0.00106	-0.00059	-0.00158	-0.00083
796	0.000801	-0.00048	-0.00104	-0.00039	-0.00074			796	-0.0011	-0.00045	-0.00133	-0.00222	-0.00133
797	0.00026	-0.00063	-0.00013	-0.00104	-9.3e-06			797	-0.0015	-0.00155	-0.00059	-0.00138	-0.00102
798	0.001501	-0.00097	-0.00105	-0.00087	0.00027			798	-0.00169	-0.00158	-0.00065	-0.00187	-0.00132
799	0.001631	-0.00095	-0.00131	-0.00016	-0.0011			799	-0.00103	-0.0013	-0.00136	-0.00177	-0.00153
800	0.00058	-0.00096	-0.00145	-0.00198	-0.00043			800	-0.00154	-0.00164	1.74e-05	-0.0021	-0.00033
801	0.001221	-0.00121	-0.00025	-0.00116	0.001015			801	-0.00168	-0.00127	-0.00028	-0.00214	-0.00129
802	0.001071	0.000153	-0.00045	-0.00031	0.000419			802	-0.0005	-0.00051	7.81e-05	-0.00144	-0.00102
803	0.000861	-0.00156	-0.00053	-0.00116	0.000391			803	-0.00173	-0.00083	-0.00041	-0.00123	-0.00105
804	0.000891	-0.00025	-0.00051	-0.00144	0.000317			804	-0.00163	-0.00165	-0.00131	-0.00107	-0.00207
805	0.00071	-0.00085	-0.00056	-0.00109	-0.00067			805	-0.00119	-0.00124	-0.00025	-0.00165	-0.0017
806	0.001071	5.72e-05	-0.00012	-0.0012	-0.00058			806	-0.00057	-0.00188	-0.00121	-0.00176	-0.00114
807	0.001031	-0.0014	-0.00105	-0.00035	0.000205			807	-0.00129	-0.00161	-0.0004	-0.00186	-0.00056
808	0.001311	-0.00088	-0.00096	-0.00104	0.00013			808	-0.00109	-0.00149	-0.00102	-0.00199	-0.00117
809	0.001491	-0.00162	-0.00101	-0.00039	0			809	-0.00101	-0.00125	-0.00088	-0.00202	-0.00071
810	0.001431	-0.00063	-0.00129	-0.00034	-0.00022			810	-0.00062	-0.00182	-0.00031	-0.00178	-0.00217
811	0.00047	-0.00019	-0.00139	-0.00182	-0.0002			811	-0.0021	-0.0007	-0.00125	-0.00246	-0.00193
812	0.001241	-0.00017	-0.00025	-0.00141	0.000121			812	-0.00134	-0.00155	-0.00073	-0.0017	-0.00109
813	0.00052	-0.0007	-0.00103	-0.00059	4.66e-05			813	-0.00106	-0.0013	-0.00056	-0.00168	-0.00139
814	0.000951	-0.00171	-0.00069	-0.00105	0.00013			814	-0.0005	-0.00069	0.000955	-0.00127	-0.00119
815	0.001241	-0.00058	0.000105	-0.00058	0.000121			815	-0.00101	-0.00088	0.001961	-0.00128	-0.00126
816	0.000911	-0.00036	-0.00059	-0.00111	-0.00084			816	-0.00075	-0.00097	0.000642	-0.0016	-0.00087
817	0.000901	-0.00124	-0.00059	-0.00036	0.000196			817	-0.00117	-0.00144	0.001137	-0.00202	-0.00179
818	0.001451	-0.00149	-0.00047	-0.00079	9.31e-05			818	-0.00087	-0.00103	0.001267	-0.00245	-0.00099
819	0.001041	-0.00062	-0.0008	-0.00059	0.000224			819	-0.0015	-0.00151	0.001328	-0.00104	-0.00086
820	0.001741	-0.00014	-0.00116	-0.001	4.66e-05			820	-0.00017	-0.00092	0.001363	-0.00191	-0.001
821	0.001431	-0.00107	-0.00155	-0.00057	0.000186			821	-0.00092	-0.0015	0.00079	-0.00051	-0.00107
822	0.002312	0.000143	-0.0009	-0.00099	-0.00024			822	-2.8e-05	-0.00105	0.000651	-0.00165	-0.00118
823	0.000911	-0.00127	-0.00052	-0.00083	-0.00059			823	-0.00076	-0.00158	0.000122	-0.00212	-0.0015
824	0.001641	-0.00129	-0.00086	-0.00028	0.001024			824	-0.00031	-0.00127	0.000564	-0.00188	-0.00081
825	0.001141	-0.00052	-0.00145	-0.00096	-0.00037			825	-0.00102	-0.00168	0.000703	-0.0024	-0.00139
826	0.001541	-0.00031	-2.6e-05	-0.00147	0.000456			826	-0.0018	-0.0011	0.000382	-0.00185	-0.00082
827	0.001281	-0.00054	-0.00055	-0.0011	-9.3e-06			827	-0.00152	-0.00138	0.000286	-0.00236	-0.00078
828	0.001241	-0.00094	5.26e-05	-0.00102	-0.00011			828	-0.0016	-0.00093	0.00072	-0.00221	-0.00113
829	0.00044	-0.00062	-0.00066	-0.00069	-0.00106			829	-0.00127	-0.00053	0.001146	-0.00112	-0.00145
830	0.001251	-0.00062	-0.00137	-0.00079	-0.00012			830	-0.00098	-0.0009	6.08e-05	-0.00147	-0.00028
831	0.00028	-0.00049	-0.00052	-0.0006	0.000149			831	-0.00164	-0.00105	6.94e-05	-0.00107	-0.00107
832	0.000771	-0.00018	-0.00075	-0.00054	-0.0006			832	-0.00154	-0.0007	-0.00041	-0.00128	0.000183
833	0.001371	-6.7e-05	-0.00056	-0.00036	0.000168			833	-0.00108	-0.00133	0.000521	-0.00119	-0.00105
834	0.001461	-0.00058	-0.00068	3.53e-05	-0.0011			834	-0.00085	-0.00047	0.000599	-0.00152	-0.00102
835	0.001891	-0.00084	-0.00068	-0.00018	-3.7e-05			835	-0.00067	-0.00123	0.000373	-0.00191	-0.00071
836	0.001671	-0.0007	0	4.41e-05	0.000224			836	-0.00055	-0.00116	-2.6e-05	-0.00118	-0.00082
837	0.002221	-0.00073	-0.00115	-0.00068	0.000587			837	-0.00095	-0.00088	-0.00029	-0.00086	-0.00145
838	0.001771	-0.00061	-0.00048	-0.00131	-5.6e-05			838	-0.00077	-0.00153	0.000443	-0.00121	-0.00108
839	0.000911	0.000362	-0.00079	-0.00034	0.000168			839	0.000186	-0.00145	-0.00015	-0.0007	-0.00182
840	0.001161	-0.00078	-0.00094	2.65e-05	-0.00041			840	-0.00055	-0.00054	-8.7e-06	-0.00116	-0.00071
841	0.001211	-0.0009	-0.00088	-0.0006	-0.00041			841	-0.00055	-0.00021	0.000243	-0.00195	-0.00093
842	0.001481	-0.00071	0.000579	-0.0011	-0.00098			842	-0.00016	-0.00093	0.000234	-0.00156	-0.00032
843	0.001841	-0.00072	-0.00144	-0.00121	-0.00075			843	-0.00125	-0.00105	-4.3e-05	-0.00099	-0.0014
844	0.001201	7.63e-05	-0.00019	-0.00056	-0.0004			844	-0.00117	-0.0008	0.000486	-0.00187	-0.0006
845	0.001331	-0.00134	-0.00046	-0.00158	-0.00041			845	-0.00146	-0.00046	0.001015	-0.00149	-0.00152
846	0.001671	-0.00026	-0.00091	-0.00037	-0.00023			846	-0.00124	-0.00134	0.000182	-0.00146	-0.00112
847	0.001331	0.000458	-0.00044	-0.00143	-0.00055			847	-0.00086	-0.00138	0.000122	-0.00139	-0.00123
848	0.001181	-0.00011	-0.0006	-0.00035	-0.00025			848	-0.0001	-0.00042	-0.00031	-0.00094	-0.00105
849	0.001261	-0.00113	-0.00034	-3.5e-05	8.38e-05			849	0.00014	-0.00061	-0.00035	-0.00206	-9.6e-05
850	0.001611	-0.00018	-0.00022	-0.00113	-0.00053			850	-0.00081	-0.00111	0.000573	-0.00111	-0.00078
851	0.001881	0.000324	-0.00051	-0.00177	0.000317			851	-0.00059	-0.00157	0.000911	-0.00156	-0.00146
852	0.001311	0.000238	-0.00045	-0.00049	0.000475			852	-0.00095	0.000382	0.00013	-0.00173	-0.0011
853	0.001201	-0.00031	-0.0003	-0.00105	-0.0007			853	-0.00202	-0.00054	-0.00039	-0.00135	-0.00113
854	-0.00014	-7.6e-05	-0.0011	-0.00137	7.45e-05			854	0.000475	-0.00067	-0.0003	-0.00149	-0.00023
855	0.001561	-0.00106	-0.00145	-0.00106	0.000829			855	-0.00053	-0.00051	-0.00052	-0.00176	-0.00065
856	0.00068	-0.00058	0.00014	-0.00025	-0.00102			856	-0.00036	-0.00113	-0.00013	-0.00152	-0.00049
857	0.001401	-0.00077	-0.00177	-0.00144	0.000196			857	-0.00094	-0.00102	0.000694	-0.00127	-0.0014
858	0.00015	0.000401	-0.00046	-0.00029	-6.5e-05			858	-6.5e-05	-0.00023	-0.00049	-0.00157	-0.00119
859	0.001271	0.000114	-0.00085	-0.00115	0.000466			859	-0.00098	-0.00063	-0.00023	-0.00153	-0.00153
860	0.001301	-0.00023	-4.4e-05	-0.00136	0.000605			860	-0.00052	-0.0009	6.94e-05	-0.00121	-0.00052
861	0.001221	0.000429	-0.00067	-0.00081	0.00027			861	-0.00073	-0.00062	-0.00038	-0.00141	-0.00088
862	0.00074	-0.00051	-0.00093	-0.00105	-0.00101			862	-0.00101	-0.0013	0.000191	-0.0014	-0.00023
863	0.001021	-0.00098	-0.00154	-0.00091	0.000531			863	-0.00016	-0.00148	0.000868	-0.00181	-0.00083
864	0.001251	-0.00101	-0.00052	-0.00061	-0.00083			864	-0.0002	-0.00089	0.0002	-0.00171	-0.00042
865	0.002061	-0.00049	-0.0006	-0.00056	0.000345			865	-7.4e-05	-0.00046	0.000278	-0.00136	-0.00041
866	0.000861	-0.00107	-0.00011	-0.00092	0.000121			866	-0.0005	-0.00046	-0.00023	-0.00086	-0.00013
867	0.000921	-0.00068	-0.0011	-0.0012	9.31e-05			867	-0.00077	-0.00101	-7.8e-05	-0.0011	-0.00078
868	0.001241	0.000267	-0.00099	-0.00064	0.000475			868	-0.00079	-0.00091	0.000182	-0.00178	-0.00167
869	0.0004	0.000458	-0.00041	-0.00045	0.000708			869	-0.00175	-0.00017	0.000286	-0.00159	-0.00035
870	0.001521	-0.00028	-1.8e-05	-0.0005	-0.00052			870	-0.00053	-0.00127	4.34e-05	-0.00138	-0.00151
871	0.000951	-0.00026	0.000324	-0.00081	-7.5e-05			871	0.000456	-0.00115	0.000234	-0.00175	-0.00095
872	0.001181	-0.00057	-0.00031	-0.00123	0.000782			872	-0.00049	-0.00123	-0.00028	-0.00089	-0.00041
873	0.00051	-0.00032	-0.00118	-0.00072	0.000345			873	-0.00029	-0.00035	0.000772	-0.00156	-0.00111
874	0.001141	0.000162	0.00021	-0.001	8.38e-05			874	-0.00044	-0.00139	0.000469	-0.00212	-0.0003
875	0.000931	0.000744	0.000219	-0.00098	0.000196			875	-0.00119	-0.00119	-0.00016	-0.00118	-0.00038
876	0.000921	0.000114	-0.00096	-0.00056	0.000419			876	-0.00025	-0.00066	0.000469	-0.00155	-0.00066
877	0.000831	-0.00108	0.000158	0.000273	-0.00037			877	0.000214	-0.00055	-0.00132	-0.00129	-0.00121
878	0.000951	-0.00022	-0.00018	-0.00045	0.000996			878	-0.00054	-0.0012	0.000677	-0.00142	-0.00065
879	0.001331	0.000696	-0.00021	-0.00063	0.000549			879	0.000354	-0.00044	-0.00107	-0.00103	-0.00146
880	0.000861	-9.5e-06	0.000123	-0.00048	-0.00026			880	-0.00064	-5.8e-05	-0.00107	-0.00101	-0.00119
881	0.00063	-0.00038	-0.0007	-0.00128	0			881	-0.00096	-0.00065	-0.0005	-0.00044	-0.00082
882	0.00064	0.000143	-2.6e-05	-0.00151	0.00013			882	-0.0004	-0.00064	0.000625	-0.0014	-0.00069
883	0.000891	-0.00052	-0.00052	-0.00043	5.59e-05			883	-0.0008	-0.00046	3.47e-05	-0.00122	-0.00109
884	0.000791	-0.00048	-0.00097	-0.0012	0.000754			884	-3.7e-05	-0.00032	6.94e-05	-0.00086	-0.00087
885	0.001011	0.000696	0.000307	-0.0011	0.000466			885	-0.00038	-6.6e-05	-0.00029	-0.00111	-0.00015
886	0.001461	-0.00124	-0.00039	-0.00053	0.000373			886	-0.00063	-0.00061	-9.5e-05	-0.00073	-0.00066
887	0.001351	0.000315	-0.00018	-0.00069	0.000112			887	0.000689	-0.00101	0.000122	-0.00208	-0.00097
888	0.00042	-0.00033	0.000307	-0.00065	0.000633			888	-0.00031	-0.00072	0.000391	-0.00118	-0.0011
889	0.001661	9.54e-06	-0.00045	-0.00012	-7.5e-05			889	0.000921	0.000149	-0.00013	-0.00092	-0.00065
890	0.00059	0.000181	-0.00011	-0.00075	0.000941			890	-0.00016	-0.00108	-0.00069	-0.00132	-0.00071
891	0.001451	-0.00013	1.75e-05	-0.00088	-0.00037			891	-0.00116	-0.00056	0.000113	-0.0014	-0.00071
892	0.000781	9.54e-06	-0.00027	-0.0013	0.000363			892	5.58e-05	-0.00061	0.000417	-0.00108	-0.0012
893	0.001141	0.000553	-0.00046	-0.00105	0.001024			893	-0.00031	-0.00046	-0.00046	-0.00182	-0.00087
894	0.001421	-0.00056	-0.0002	-0.00073	0.000112			894	-2.8e-05	-0.00089	-3.5e-05	-0.00071	-0.00095
895	0.00035	0.000696	-0.00017	-0.00031	0.000177			895	-0.00115	0.000133	0.000434	-0.00125	6.1e-05
896	1e-05	0.00042	-0.00015	-0.00011	0.001611			896	-0.00068	-0.00121	0.000174	-0.00247	3.49e-05
897	0.00059	-0.00053	-0.00115	-0.00071	0.00095			897	-0.00016	0.000166	-0.00023	-0.00124	-0.00079
898	-5e-05	-0.00071	0.000693	-0.00067	0.000354			898	-0.00011	-5.8e-05	-0.00043	-0.00135	-0.00046
899	0.00069	-0.00038	0.000263	-0.00121	0.000419			899	-3.7e-05	-0.00012	0.000408	-0.00112	-9.6e-05
900	0.001261	0.000219	-9.6e-05	-0.00046	0.00095			900	0.00013	-0.0011	0.000338	-0.00225	-0.00053
901	0.001541	0.000134	0.000149	-0.00143	0.000531			901	-0.00042	-0.00051	0.000477	-0.00145	-0.00039
902	-0.00029	-0.00058	-0.00059	-0.00107	0.000726			902	-0.00034	-0.00137	0.000104	-0.00122	-0.00079
903	0.000771	-0.00024	-0.00021	-0.00159	0.000522			903	-9.3e-05	-0.00028	-0.00023	-0.00131	-7e-05
904	0.001241	-0.00161	-0.00034	-0.00075	0.000903			904	-0.0002	-0.00057	7.81e-05	-0.00118	-0.00052
905	0.001711	0.000792	-0.0006	-0.00094	0.000298			905	0.000391	-0.00037	-0.00038	-0.00156	-0.00105
906	0.000911	0.00083	-0.00057	-0.00056	0.000801			906	-0.00017	-0.00014	-0.00082	-0.00116	-0.00096
907	0.00021	-0.00063	-0.00068	-0.00041	-0.00022			907	0.000986	-0.00042	-0.00026	-0.00114	-0.00069
908	0.001031	-0.00074	0.000544	-0.00162	0.001164			908	-0.00046	-0.00034	-0.0006	-0.00168	-0.00055
909	0.00015	0.000353	-0.00077	-0.00127	0.000494			909	-0.00029	-0.00026	-0.00068	-0.00106	-0.00098
910	0.00042	-0.00043	-0.00091	-0.00078	-7.5e-05			910	6.51e-05	8.3e-05	0.000269	-0.00045	-0.00077
911	0.00043	-0.00016	-0.00068	-0.00098	0.000186			911	3.72e-05	-0.00058	-0.00023	-0.00053	9.59e-05
912	0.00055	0.0002	9.65e-05	-0.00086	0.000643			912	-0.0002	-0.00031	-0.00076	-0.00203	-0.0009
913	-1e-05	-0.00033	0.000307	-8.8e-05	-0.00011			913	-0.00044	-0.00014	-0.00041	-0.00206	-0.00023
914	0.000981	0.00082	-0.00017	-7.9e-05	0.000587			914	-0.00025	-1.7e-05	0.000104	-0.00144	-0.00112
915	0.000851	0.000362	-0.00146	-0.00086	0.001341			915	0.000186	-0.00081	-0.00089	-0.0013	-0.00058
916	0.00025	0.000191	-0.00069	-0.00052	0.001052			916	0.000512	-0.00078	-0.00038	-0.00089	-4.4e-05
917	0.000801	0.000238	0.000167	-0.00147	0.000615			917	0.000642	-0.00063	-0.00053	-0.00134	-0.00151
918	0.001451	0.000172	-8.8e-05	-3.5e-05	0.000661			918	-0.00024	-0.00061	-0.0007	-0.00241	-0.00065
919	0.001651	-0.00075	-0.00027	-0.00044	0.000615			919	-0.00033	-0.0005	-0.00073	-0.00181	-0.00067
920	0.001231	-0.00019	-0.00017	-0.00116	0.000224			920	0.000214	0.000249	-0.00023	-0.0017	-0.00119
921	-0.00044	0.000305	0.000693	-0.00081	0.001006			921	0.000549	-0.00061	-0.00018	-0.00132	-0.00038
922	0.00019	-0.00046	0.000596	-0.00142	0.000708			922	9.31e-06	-0.00078	-0.00042	-0.00101	-0.00054
923	0.00042	-0.00033	-0.00037	0	0.000829			923	-0.00026	-0.00018	-0.0002	-0.00121	0.000174
924	0.00038	0.000277	0.00064	-0.0005	0.000466			924	0.000624	-0.00011	0.000226	-0.00119	-0.00038
925	0.000821	0.000515	-7e-05	8.82e-06	0.001062			925	-0.00046	-0.00053	-0.00029	-0.00098	-0.00026
926	-0.00066	0.000229	-0.00025	-0.00064	0.001229			926	0.00027	3.32e-05	-0.00077	-0.00118	-0.00084
927	-7e-05	0.000506	0.000123	-0.00146	0.000354			927	-0.00038	-2.5e-05	-0.00035	-0.00035	0.00088
928	0.000891	-0.00025	0.000535	-0.00063	0.000214			928	0.000382	-0.00012	-0.00012	-0.00086	-0.00071
929	0.00057	0.000248	-0.00085	-0.0007	0.000531			929	0.000242	-0.00041	-0.00101	-0.00172	-0.00067
930	0.00015	0.000982	-7.9e-05	-0.00103	0.000326			930	0.000549	-0.00022	-0.00046	-0.00094	-0.00025
931	0.000911	-0.00021	-0.00039	-0.00066	0			931	0.000745	-0.00066	-0.00012	-0.00067	-0.00073
932	-0.00053	0.000343	0.000219	-0.00034	0.001015			932	0.000512	-0.00148	-0.00032	-0.00125	-0.00071
933	0.00039	0.000362	0.000588	-0.00047	0.000903			933	0.000679	0.000274	-0.00014	-0.00153	-2.6e-05
934	0.00017	0.000191	4.38e-05	-0.00107	0.000568			934	0.000382	-0.0007	-0.00065	-0.0009	-0.00112
935	-1e-05	0.000515	1.75e-05	-0.00068	0.001434			935	-0.00016	-0.00017	8.68e-05	-0.00151	-0.00028
936	-0.00022	0.000467	-0.00068	-0.00068	0.000885			936	4.65e-05	-0.00037	0.00013	-0.00096	-0.00029
937	9.01e-05	0.00061	-0.00025	-0.00038	-0.0003			937	-9.3e-06	0.000274	2.6e-05	-0.00073	0.000174
938	0.001221	0.000591	-0.0006	-0.0005	0.000587			938	4.65e-05	-0.00025	-4.3e-05	-0.00178	-0.00019
939	0.00017	0.000982	-0.00068	-0.00176	0.000847			939	-0.00065	-0.00028	-0.00042	0.000497	-0.00058
940	0.001061	0.000773	-6.1e-05	-0.0008	9.31e-05			940	1.86e-05	0.00044	-0.00025	-0.00061	-0.0008
941	9.01e-05	0.000458	0.000465	-0.00101	0.000661			941	-5.6e-05	0.000465	-0.00037	-0.00186	-0.00074
942	0.000791	0.00083	-0.00019	-0.00111	0.000335			942	-0.00034	-0.00033	-0.00015	0.000159	-0.00062
943	0.00037	-0.00081	-0.00099	-0.00029	0.000531			943	-0.00036	0.000307	0	-0.00093	-0.00092
944	0.00018	0.001507	-0.00011	-0.00116	0.001155			944	0.000149	0.000523	-0.00053	-0.00068	-0.00117
945	0.00038	0.000105	-0.00167	-0.00045	0.00122			945	9.31e-06	-0.00058	-0.00019	-0.00196	-9.6e-05
946	8.01e-05	-0.00018	-0.00106	-0.00111	0.000894			946	0.000512	0	4.34e-05	-0.00059	-0.00065
947	0.000851	0.000114	-0.00066	-0.00069	0.001388			947	0.0008	0.000315	0.000104	3.75e-05	-0.00082
948	0.00055	0.000725	-0.00054	-0.00017	-0.00057			948	-0.00027	-0.00083	-0.0011	-0.00056	0.000532
949	-6e-05	0.000668	-0.00124	-0.0005	0.000419			949	-0.00034	-0.00043	0.000286	-0.00013	6.1e-05
950	0.001001	-0.00011	-0.00025	-0.00177	0.000624			950	8.38e-05	-0.00077	0.0002	-0.00026	-0.0012
951	0.000911	0.00103	-0.00047	-0.00076	0.000894			951	0.000251	8.3e-06	-0.00076	-0.00129	-0.00037
952	0.00045	0.000286	-0.00051	-0.00041	0.000466			952	0.001275	-0.001	0.000174	-0.00051	0.000846
953	-0.0003	0.000372	-0.00109	-2.6e-05	0.000261			953	0.000484	2.49e-05	-0.00049	-0.00096	-0.00199
954	1e-05	0.000114	-0.00046	-0.00121	0.000643			954	-0.00032	-0.00123	-0.0004	-0.00109	-0.00031
955	0.001101	-0.00013	-0.00079	-0.00101	-0.00026			955	0.000521	-0.00054	-0.00057	-0.00061	-0.00051
956	0.00056	-0.00021	-0.00099	-0.00074	0.000549			956	-0.00076	0.000116	0.000469	-0.00014	-0.00056
957	0.001311	0.000153	-0.00091	0	0.000764			957	-0.0006	-0.00104	-0.0004	-0.00078	-0.00126
958	0.00048	-0.00059	-0.00175	-0.0005	0.000158			958	0.000475	-0.0004	-0.00082	-0.0013	0
959	0.00041	-0.00013	-0.00034	-0.00026	0.000428			959	-0.00013	-0.00053	0.000174	-3.7e-05	-0.00041
960	0.0003	0.000334	-0.00077	-0.00088	0.000624			960	0.001135	-8.3e-06	0.000495	-0.00037	-0.00024
961	-0.00025	-0.00025	-0.00052	-0.00053	0.001062			961	0.001005	-0.00015	-0.00041	-0.00051	-0.00037
962	0.00047	0.000305	0.000719	-0.00134	-9.3e-05			962	-0.00033	-5.8e-05	-0.0001	-0.00026	-0.00106
963	-0.00048	0.000506	-1.8e-05	-0.00086	8.38e-05			963	0.000726	0.000606	0.000451	-0.00112	-0.00123
964	0.00013	-8.6e-05	-0.00036	-0.00101	-3.7e-05			964	0.000214	-0.00088	-0.00019	-0.00014	-5.2e-05
965	-0.00067	0.000906	-0.00057	-0.00088	0.000987			965	-0.00024	0.000564	-4.3e-05	-0.00083	-0.0003
966	0.001191	-0.00094	0.000447	-0.00045	0.000158			966	0.001322	0.000548	-6.1e-05	-0.00079	-0.00051
967	-0.00029	0.000372	-0.00014	-0.00162	0.001956			967	0.00134	0.000158	0.000347	-0.00085	-0.00159
968	0.000951	0.000382	0.000149	-0.00115	0.000149			968	0.001033	-0.00037	4.34e-05	-0.00111	-0.00156
969	-0.00023	0.000591	-0.00053	-0.00063	0.000251			969	0.001247	-0.00011	-0.00025	-0.00047	-0.00048
970	0.00028	0.000172	-0.00091	-0.00173	0.000922			970	0.000409	9.96e-05	-0.0007	-0.00087	-8.7e-05
971	0.00038	0.00062	6.14e-05	-0.00056	0.001006			971	0.000288	-0.0006	-0.00016	-0.00112	-0.00154
972	0.00029	0.000477	-0.00063	-0.00016	0.001211			972	0.001424	-0.00057	0.000104	-0.00114	-0.00073
973	0.00011	0.001116	-0.00019	-0.00112	0.00041			973	0.000865	-0.00045	-0.0001	-0.00084	-0.00055
974	0.000911	0.000649	-0.00086	-0.00081	0.000736			974	0.000568	-0.0002	-0.00031	0.000422	-0.00123
975	9.01e-05	-0.00016	-0.00025	-0.00111	-0.00016			975	0.000642	0.000266	-0.00102	9.37e-06	-0.00114
976	0.0003	6.68e-05	-0.00088	-0.00095	0.000214			976	0.000177	0	0.000338	-0.00075	-0.00167
977	0.00011	-0.00068	5.26e-05	-0.00098	0.001136			977	0.001573	-9.1e-05	0.000573	-0.00094	-0.00067
978	-0.00027	0.000353	-0.00018	-0.00032	0.001183			978	0.000475	0.000988	0.001041	-0.00083	-0.00059
979	-0.00037	3.82e-05	-0.00081	-0.00035	0.00068			979	0.000642	0.000564	0.000885	-0.00012	-0.00024
980	-0.0003	-0.00046	-0.00037	-0.00149	0.000391			980	0.000596	0.000191	0.000417	-0.00022	-0.00048
981	0.00062	0.00123	-0.00039	-0.00099	0.000875			981	0.001275	-0.00041	0.000529	-0.00053	-0.00089
982	0.0004	-9.5e-05	0.000132	-0.0008	0.000568			982	0.000605	-0.00023	-3.5e-05	-0.0003	-0.00161
983	0.00045	0.000286	0.000368	-0.00075	0.000792			983	0.00108	-0.00027	-0.00016	-0.00016	-0.00037
984	2e-05	0.000439	-0.00092	-0.00092	8.38e-05			984	0.000233	-0.00037	-0.00051	-0.00095	-0.00039
985	0.001141	8.58e-05	-0.00018	-0.00161	0.000913			985	0.000763	-2.5e-05	-0.00026	-0.00018	-0.00126
986	-2e-05	0.000601	-0.00073	-0.00127	0.001006			986	0.00027	0.000158	-0.00034	-0.00028	-0.00118
987	0.00022	0.00042	-0.00087	-0.00069	-0.0002			987	0.000856	4.98e-05	0.000304	-0.00022	-0.00122
988	0.00037	-0.00041	0.000324	-0.0006	0.000419			988	0.001284	0.000805	0.000469	-0.00047	-0.00068
989	-0.0012	0.000238	-0.00024	-0.0004	0.000317			989	0.001005	-0.00027	-0.00055	-0.00116	-0.00151
990	-0.0004	0.00083	-0.00052	-0.0011	0.00014			990	0.001089	0.000108	0.000269	-0.00014	-0.00139
991	-0.00022	-0.00062	-0.00059	-0.00126	-0.00046			991	0.000456	0.000581	-0.00012	0.000328	-0.00078
992	0.00023	0.00042	-0.00076	-0.00063	0.000847			992	0.001396	0.000291	0.000807	-0.00022	-0.00073
993	0.00043	4.77e-05	-0.00067	-0.00116	-9.3e-05			993	0.000307	0.000349	6.08e-05	-0.00034	-0.00116
994	0.001281	-9.5e-06	0.000377	4.41e-05	0.000149			994	0.001024	0.000639	0.000321	-0.00014	-0.00113
995	0.00032	1.91e-05	-0.00045	-0.00057	0.00054			995	0.001926	-0.00051	2.6e-05	-0.00037	-0.00037
996	-3e-05	0.001154	-0.00012	-0.00135	0.000568			996	0.001145	-4.2e-05	-0.00016	-0.00073	-0.00112
997	0.001251	-0.0006	-0.00046	-0.00114	0.000931			997	0.001359	0.000174	0.000373	-0.00053	-0.00112
998	-0.00027	-0.00089	-0.0011	-0.00132	0.000233			998	0.000484	0.000249	0.000581	-0.00025	-0.00125
999	-0.00021	0.000782	-0.00199	-0.00081	2.79e-05			999	0.000698	-8.3e-05	0.000139	-0.00035	-0.00051
[truncated: 1 more rows]

## Sheet: Summary of Fits Stats
SRX Fraction							DRX Fraction
WT	1	2	3	Avg	Stdev		WT	Stdev
20	0.033511	0.085945	0.022478	0.0473113	0.0339095		0.952689	0.0339095
50	0.02252	0.029486	0.019408	0.0238047	0.00516036		0.976195	0.00516036
75	0.035732	0.033594	0.027129	0.0321517	0.00447919		0.967848	0.00447919
100	0.018499	0.04331	0.016706	0.0261717	0.0148693		0.973828	0.0148693
150	0.024752	0.031489	0.027281	0.0278407	0.00340319		0.972159	0.00340319
E525K	1	2	3	Avg	Stdev		E525K	Stdev		p value vs WT
20	0.079022	0.055772	0.053483	0.062759	0.0141306		0.937241	0.0141306		0.704
50	0.042126	0.061882	0.056227	0.0534117	0.0101745		0.946588	0.0101745		0.0213
75	0.100742	0.045365	0.02568	0.0572623	0.0389196		0.942738	0.0389196		0.2761
100	0.043928	0.050972	0.029073	0.0413243	0.0111793		0.958676	0.0111793		0.2879
150	0.014199	0.029503	0.046373	0.030025	0.0160934		0.969975	0.0160934		1
WT
DRX Rate	1	2	3	Avg	Stdev		Conditions	DRX Rate	DRX Fraction	SRX Rate	SRX Fraction
20	0.04	0.037	0.039	0.0386667	0.00152753		WT
50	0.037	0.033	0.038	0.036	0.00264575		20 mM KCl	0.039±0.002	0.95±0.03	0.0075±0.0074	0.05±0.03
75	0.035	0.0308	0.036	0.0339333	0.00275923		50 mM KCl	0.036±0.003	0.98±0.01	0.0058±0.0045	0.02±0.01
100	0.0337	0.0288	0.0335	0.032	0.00277308		75 mM KCl	0.034±0.003	0.97±0.01	0.0082±0.0033	0.03±0.01
150	0.029	0.025	0.0295	0.0278333	0.00246644		100 mM KCl	0.032±0.003	0.97±0.01	0.0078±0.0047	0.03±0.01
SRX Rate	1	2	3				150 mM KCl	0.028±0.002	0.97±0.01	0.0044±0.0030	0.03±0.01
20	0.0028	0.016	0.00366	0.00748667	0.00738529		E525K
50	0.0045	0.0108	0.00197	0.00575667	0.00454716		20 mM KCl	0.085±0.005	0.94±0.03	0.0197±0.0025	0.06±0.03
75	0.01156	0.0081	0.00493	0.00819667	0.00331606		50 mM KCl	0.080±0.005	0.95±0.01	0.0204±0.0048	0.05±0.01
100	0.0099	0.0111	0.0024	0.0078	0.00471487		75 mM KCl	0.076±0.006	0.94±0.04	0.0233±0.0012	0.06±0.04
150	0.000974	0.0068	0.0053	0.004358	0.00302508		100 mM KCl	0.071±0.005	0.96±0.01	0.0185±0.0045	0.04±0.01
							150 mM KCl	0.074±0.018	0.97±0.02	0.0129±0.0026	0.03±0.02
E525K
DRX Rate	1	2	3	Avg	Stdev		p value vs WT
20	0.09	0.082	0.082	0.0846667	0.0046188		0.0001
50	0.084	0.0745	0.08	0.0795	0.0047697		0.0002
75	0.08	0.069	0.079	0.076	0.00608276		0.0004
100	0.075	0.065	0.073	0.071	0.0052915		0.0003
150	0.068	0.059	0.0946	0.0738667	0.0185109		0.0094
SRX Rate	1	2	3				p value vs WT
20	0.02	0.022	0.017	0.0196667	0.00251661		0.0538
50	0.015	0.0223	0.024	0.0204333	0.00478156		0.0184
75	0.037	0.02	0.013	0.0233333	0.0123423		0.0017
100	0.023	0.0184	0.014	0.0184667	0.00450037		0.0465
150	0.01	0.0148	0.014	0.0129333	0.00257164		0.0207
DRX Rate	WT S1 vs WT HMM					DRX Rate	E525K S1 vs E525K HMM
	S1	HMM	p value				S1	HMM	p value
20	0.039±0.002	0.014±0.002	0.0001			20	0.085±0.005	0.027±0.008	0.0004
50	0.036±0.003	0.013±0.001	0.0004			50	0.080±0.005	0.019±0.002	0.0001
75	0.034±0.003	0.015±0.002	0.0008			75	0.076±0.006	0.016±0.006	0.0003
100	0.032±0.003	0.016±0.001	0.0009			100	0.071±0.005	0.014±0.003	0.0001
150	0.028±0.002	0.018±0.001	0.0015			150	0.074±0.018	0.013±0.002	0.0043
SRX Rate	WT S1 vs WT HMM					SRX Rate	E525K S1 vs E525K HMM
	S1	HMM	p value				S1	HMM	p value
20	0.0075±0.0074	0.0033±0.0001	0.3812			20	0.0197±0.0025	0.0022±0.0002	0.0003
50	0.0058±0.0045	0.0054±0.0005	0.9229			50	0.0204±0.0048	0.0026±0.0001	0.003
75	0.0082±0.0033	0.0069±0.0009	0.5463			75	0.0233±0.0012	0.0030±0.0001	0.0001
100	0.0078±0.0047	0.0058±0.0004	0.5034			100	0.0185±0.0045	0.0033±0.0001	0..0043
150	0.0044±0.0030	0.0071±0.0008	0.2065			150	0.0129±0.0026	0.0042±0.0001	0.0044
