# Supplementary material for: Dilated cardiomyopathy mutation E525K in human beta-cardiac myosin stabilizes the interacting-heads motif and super-relaxed state of myosin
Source: eLife journal article supplement (doi:10.7554/elife.77415), 2022-11-08
Supplement: fig4-data1 [file Figure 4 Source Data 1.xlsx]

## Sheet: Figure 4A&B
WT	Rep Traces	0.25 uM M2B	1 uM Cy3ATP						E525K	Rep Traces	0.25 uM M2B	1 uM Cy3ATP
Time	Donor only control	20 KCl data	20 KCl fit	20 KCl residuals	150 KCl data	150 KCl fit	150 KCl residuals		Time	Donor only control	20 KCl data	20 KCl fit	20 KCl residuals	150 KCl data	150 KCl fit	150 KCl residuals
0.001									0.001
0.002	6.72137	6.73078	6.82149	-0.09071	6.70934	6.81235	-0.10301		0.002	6.50355	6.52023	6.60313	-0.0829	6.51219	6.60174	-0.08955
0.003	6.74612	6.78863	6.82126	-0.03263	6.76338	6.81233	-0.04896		0.003	6.55215	6.56058	6.60298	-0.0424	6.56446	6.60169	-0.03722
0.004	6.80217	6.79272	6.82103	-0.02831	6.79533	6.81232	-0.01698		0.004	6.56238	6.57182	6.60283	-0.03101	6.57236	6.60164	-0.02927
0.005	6.78867	6.78867	6.82081	-0.03213	6.78867	6.8123	-0.02363		0.005	6.57241	6.55809	6.60269	-0.0446	6.5722	6.60159	-0.02938
0.006	6.78117	6.8016	6.82058	-0.01898	6.78039	6.81228	-0.03189		0.006	6.55683	6.57248	6.60254	-0.03006	6.57743	6.60153	-0.0241
0.007	6.76439	6.77883	6.82036	-0.04153	6.77195	6.81226	-0.04031		0.007	6.56283	6.5783	6.60239	-0.0241	6.56849	6.60148	-0.03299
0.008	6.79091	6.80122	6.82013	-0.01891	6.78627	6.81225	-0.02597		0.008	6.57613	6.58586	6.60225	-0.01639	6.5726	6.60143	-0.02883
0.009	6.8224	6.81048	6.81991	-0.00943	6.82557	6.81223	0.013343		0.009	6.60827	6.60212	6.6021	1.14e-05	6.58448	6.60138	-0.0169
0.01	6.82072	6.823	6.81968	0.003321	6.82061	6.81221	0.008403		0.01	6.62962	6.59993	6.60196	-0.00203	6.61302	6.60133	0.011691
0.011	6.8138	6.8033	6.81946	-0.01615	6.81747	6.81219	0.005283		0.011	6.60375	6.59839	6.60182	-0.00343	6.60191	6.60128	0.000625
0.012	6.8173	6.8081	6.81923	-0.01113	6.80317	6.81217	-0.00901		0.012	6.59331	6.5948	6.60167	-0.00687	6.59349	6.60123	-0.00775
0.013	6.79795	6.82259	6.81901	0.003585	6.7966	6.81216	-0.01556		0.013	6.59827	6.59472	6.60153	-0.00681	6.5907	6.60118	-0.01049
0.014	6.81261	6.81134	6.81879	-0.00745	6.80097	6.81214	-0.01116		0.014	6.59454	6.6022	6.60138	0.000816	6.59741	6.60113	-0.00372
0.015	6.80866	6.81416	6.81856	-0.0044	6.81311	6.81212	0.000991		0.015	6.60931	6.59535	6.60124	-0.00589	6.60429	6.60108	0.003207
0.016	6.82305	6.81496	6.81834	-0.00338	6.81653	6.8121	0.004427		0.016	6.59721	6.60263	6.6011	0.001535	6.59421	6.60103	-0.00682
0.017	6.81558	6.81722	6.81812	-0.0009	6.82293	6.81209	0.010849		0.017	6.61403	6.60272	6.60095	0.001766	6.60691	6.60098	0.005932
0.018	6.80756	6.81984	6.8179	0.001937	6.8195	6.81207	0.007435		0.018	6.62608	6.61909	6.60081	0.018279	6.59911	6.60093	-0.00182
0.019	6.81546	6.8181	6.81768	0.000425	6.80755	6.81205	-0.0045		0.019	6.61366	6.5956	6.60067	-0.00507	6.60029	6.60088	-0.00059
0.02	6.80734	6.82403	6.81746	0.006573	6.82045	6.81203	0.008417		0.02	6.62295	6.615	6.60053	0.014476	6.60422	6.60083	0.003389
0.021	6.82746	6.81699	6.81724	-0.00025	6.80334	6.81202	-0.00868		0.021	6.61597	6.59999	6.60039	-0.0004	6.60053	6.60078	-0.00025
0.022	6.7997	6.82362	6.81702	0.006599	6.81534	6.812	0.003343		0.022	6.60741	6.61262	6.60025	0.012374	6.5812	6.60073	-0.01953
0.023	6.81502	6.81184	6.8168	-0.00496	6.8046	6.81198	-0.00738		0.023	6.59818	6.60527	6.60011	0.00517	6.59817	6.60068	-0.00251
0.024	6.80552	6.81815	6.81658	0.001569	6.80046	6.81196	-0.01151		0.024	6.60452	6.59484	6.59996	-0.00513	6.59507	6.60063	-0.00557
0.025	6.80336	6.82493	6.81636	0.008569	6.81102	6.81195	-0.00092		0.025	6.61918	6.60156	6.59982	0.001733	6.60808	6.60058	0.007499
0.026	6.81644	6.84094	6.81615	0.024795	6.81267	6.81193	0.000742		0.026	6.61847	6.60258	6.59968	0.002897	6.60264	6.60053	0.002112
0.027	6.81475	6.8259	6.81593	0.009976	6.81769	6.81191	0.005776		0.027	6.60764	6.59858	6.59954	-0.00097	6.59568	6.60048	-0.0048
0.028	6.82418	6.81638	6.81571	0.000666	6.81324	6.81189	0.001348		0.028	6.60661	6.59186	6.5994	-0.00754	6.59376	6.60043	-0.00667
0.029	6.80865	6.82132	6.81549	0.005824	6.81102	6.81187	-0.00085		0.029	6.61533	6.59792	6.59927	-0.00135	6.59428	6.60038	-0.0061
0.03	6.82166	6.81222	6.81528	-0.00306	6.80743	6.81186	-0.00442		0.03	6.61762	6.60676	6.59913	0.007638	6.59982	6.60033	-0.00051
0.031	6.81084	6.81354	6.81506	-0.00152	6.81677	6.81184	0.004925		0.031	6.61216	6.60739	6.59899	0.008402	6.60498	6.60028	0.004698
0.032	6.82322	6.81626	6.81485	0.001418	6.81688	6.81182	0.005055		0.032	6.60573	6.59701	6.59885	-0.00184	6.59354	6.60023	-0.00669
0.033	6.81884	6.814	6.81463	-0.00063	6.80858	6.8118	-0.00322		0.033	6.61714	6.59604	6.59871	-0.00267	6.60521	6.60018	0.005028
0.034	6.82526	6.82624	6.81442	0.011824	6.81217	6.81179	0.000378		0.034	6.6096	6.61248	6.59857	0.013908	6.59326	6.60013	-0.00687
0.035	6.81966	6.82866	6.8142	0.014452	6.81433	6.81177	0.002561		0.035	6.6033	6.61031	6.59844	0.011872	6.59359	6.60008	-0.0065
0.036	6.82759	6.82763	6.81399	0.013638	6.79509	6.81175	-0.01666		0.036	6.61191	6.6039	6.5983	0.005604	6.60052	6.60003	0.000483
0.037	6.83301	6.82275	6.81378	0.008977	6.8165	6.81173	0.004768		0.037	6.62299	6.60583	6.59816	0.007663	6.60258	6.59998	0.002592
0.038	6.83386	6.81268	6.81356	-0.00089	6.81233	6.81172	0.000615		0.038	6.61481	6.60168	6.59803	0.003652	6.5975	6.59993	-0.00244
0.039	6.82302	6.82641	6.81335	0.013063	6.81484	6.8117	0.003143		0.039	6.61796	6.59685	6.59789	-0.00104	6.6094	6.59989	0.009512
0.04	6.81629	6.81167	6.81314	-0.00147	6.80244	6.81168	-0.00924		0.04	6.62578	6.59809	6.59775	0.000338	6.59753	6.59984	-0.0023
0.041	6.81165	6.82201	6.81293	0.009083	6.81253	6.81166	0.000869		0.041	6.61385	6.59477	6.59762	-0.00285	6.61061	6.59979	0.010828
0.042	6.82118	6.8112	6.81272	-0.00152	6.81601	6.81165	0.004363		0.042	6.62513	6.59501	6.59748	-0.00247	6.60379	6.59974	0.004054
0.043	6.80214	6.82013	6.8125	0.007625	6.81594	6.81163	0.004314		0.043	6.62399	6.60131	6.59735	0.00396	6.5995	6.59969	-0.00019
0.044	6.8206	6.80587	6.81229	-0.00643	6.81787	6.81161	0.006257		0.044	6.60572	6.597	6.59721	-0.00021	6.59409	6.59964	-0.00555
0.045	6.81186	6.8177	6.81208	0.005616	6.81824	6.81159	0.006648		0.045	6.62137	6.59684	6.59708	-0.00023	6.59904	6.59959	-0.00055
0.046	6.82082	6.81735	6.81187	0.005479	6.81783	6.81158	0.006254		0.046	6.62157	6.60655	6.59694	0.009609	6.59948	6.59954	-5.57e-05
0.047	6.82236	6.81224	6.81167	0.000576	6.80447	6.81156	-0.00709		0.047	6.60615	6.60696	6.59681	0.010154	6.59563	6.59949	-0.00386
0.048	6.82165	6.80967	6.81146	-0.00179	6.8146	6.81154	0.003056		0.048	6.6222	6.60268	6.59668	0.006001	6.61018	6.59944	0.010744
0.049	6.80602	6.8159	6.81125	0.004651	6.8023	6.81152	-0.00922		0.049	6.62699	6.59893	6.59654	0.002384	6.61751	6.59939	0.018116
0.05	6.81066	6.81679	6.81104	0.005754	6.81818	6.81151	0.006677		0.05	6.62292	6.60402	6.59641	0.007611	6.58477	6.59934	-0.01457
0.051	6.81533	6.81357	6.81083	0.002742	6.81765	6.81149	0.006157		0.051	6.61149	6.59947	6.59628	0.003192	6.60392	6.59929	0.004624
0.052	6.81944	6.82364	6.81062	0.013015	6.82102	6.81147	0.00955		0.052	6.6187	6.58926	6.59614	-0.00688	6.59944	6.59924	0.000203
0.053	6.82669	6.82114	6.81042	0.010725	6.81024	6.81146	-0.00122		0.053	6.61076	6.59455	6.59601	-0.00146	6.597	6.59919	-0.00219
0.054	6.81506	6.81936	6.81021	0.009153	6.81399	6.81144	0.002551		0.054	6.62684	6.60707	6.59588	0.011188	6.5886	6.59914	-0.01055
0.055	6.82197	6.80316	6.81001	-0.00684	6.80196	6.81142	-0.00946		0.055	6.60772	6.59289	6.59575	-0.00286	6.59818	6.59909	-0.00091
0.056	6.82162	6.8201	6.8098	0.010298	6.81413	6.8114	0.002723		0.056	6.60502	6.595	6.59562	-0.00061	6.59839	6.59904	-0.00066
0.057	6.80745	6.80028	6.80959	-0.00932	6.8145	6.81139	0.003114		0.057	6.61423	6.60363	6.59548	0.008145	6.59775	6.599	-0.00125
0.058	6.81754	6.81779	6.80939	0.008399	6.81051	6.81137	-0.00085		0.058	6.61423	6.60158	6.59535	0.006231	6.60254	6.59895	0.003599
0.059	6.82652	6.8215	6.80918	0.01232	6.82243	6.81135	0.011081		0.059	6.61614	6.59608	6.59522	0.000856	6.60037	6.5989	0.001473
0.06	6.82784	6.82354	6.80898	0.014563	6.82235	6.81133	0.011017		0.06	6.62591	6.59313	6.59509	-0.00197	6.61048	6.59885	0.011629
0.061	6.81249	6.81273	6.80878	0.003955	6.80663	6.81132	-0.00468		0.061	6.62817	6.60329	6.59496	0.008329	6.59369	6.5988	-0.00511
0.062	6.81695	6.81645	6.80857	0.007875	6.80855	6.8113	-0.00275		0.062	6.62698	6.60357	6.59483	0.008733	6.60158	6.59875	0.002835
0.063	6.8136	6.8131	6.80837	0.004726	6.81555	6.81128	0.00427		0.063	6.60694	6.60135	6.5947	0.006646	6.59344	6.5987	-0.00526
0.064	6.82906	6.8144	6.80817	0.006229	6.80616	6.81126	-0.0051		0.064	6.61683	6.60475	6.59457	0.010178	6.59016	6.59865	-0.00849
0.065	6.8226	6.82166	6.80797	0.013693	6.81421	6.81125	0.002963		0.065	6.60852	6.59656	6.59444	0.002121	6.59289	6.5986	-0.00571
0.066	6.81281	6.81153	6.80776	0.003761	6.82405	6.81123	0.01282		0.066	6.61023	6.60075	6.59431	0.006438	6.59284	6.59855	-0.00571
0.067	6.80542	6.81793	6.80756	0.010368	6.82536	6.81121	0.014151		0.067	6.60776	6.60202	6.59419	0.007831	6.60237	6.5985	0.00387
0.068	6.82247	6.80978	6.80736	0.002419	6.81198	6.8112	0.000787		0.068	6.61572	6.59327	6.59406	-0.00079	6.597	6.59845	-0.00146
0.069	6.81667	6.82056	6.80716	0.013401	6.80389	6.81118	-0.00729		0.069	6.60563	6.59693	6.59393	0.003003	6.61154	6.59841	0.013134
0.07	6.82145	6.82136	6.80696	0.014405	6.80096	6.81116	-0.0102		0.07	6.61103	6.60862	6.5938	0.014819	6.60718	6.59836	0.008821
0.071	6.82756	6.81646	6.80676	0.009701	6.80975	6.81114	-0.00139		0.071	6.61439	6.59819	6.59367	0.004515	6.59051	6.59831	-0.0078
0.072	6.8128	6.80297	6.80656	-0.00359	6.81138	6.81113	0.000256		0.072	6.61208	6.58527	6.59355	-0.00828	6.58945	6.59826	-0.00881
0.073	6.81556	6.81395	6.80636	0.00759	6.81114	6.81111	2.93e-05		0.073	6.61877	6.59278	6.59342	-0.00064	6.60363	6.59821	0.005417
0.074	6.82816	6.8173	6.80616	0.011143	6.80694	6.81109	-0.00415		0.074	6.62203	6.61521	6.59329	0.021917	6.58818	6.59816	-0.00999
0.075	6.83004	6.81641	6.80596	0.010446	6.81173	6.81107	0.000656		0.075	6.61164	6.59826	6.59317	0.005089	6.60151	6.59811	0.0034
0.076	6.81484	6.81506	6.80577	0.009296	6.8134	6.81106	0.002339		0.076	6.60166	6.59771	6.59304	0.004668	6.60346	6.59806	0.005394
0.077	6.81585	6.80848	6.80557	0.00291	6.81403	6.81104	0.00299		0.077	6.61022	6.59257	6.59291	-0.00034	6.595	6.59801	-0.00302
0.078	6.83181	6.79753	6.80537	-0.00784	6.81999	6.81102	0.008972		0.078	6.61129	6.6035	6.59279	0.010715	6.5898	6.59797	-0.00817
0.079	6.81123	6.79464	6.80517	-0.01054	6.81181	6.811	0.000809		0.079	6.60977	6.58684	6.59266	-0.00582	6.61298	6.59792	0.015059
0.08	6.82141	6.81181	6.80498	0.006837	6.81792	6.81099	0.006928		0.08	6.62577	6.59678	6.59254	0.004243	6.60504	6.59787	0.007171
0.081	6.81482	6.80874	6.80478	0.003957	6.81503	6.81097	0.004063		0.081	6.61567	6.60639	6.59241	0.01398	6.59448	6.59782	-0.00334
0.082	6.81502	6.80442	6.80459	-0.00016	6.80701	6.81095	-0.00395		0.082	6.61942	6.59648	6.59229	0.004194	6.59658	6.59777	-0.00119
0.083	6.80408	6.81622	6.80439	0.01183	6.81804	6.81094	0.007101		0.083	6.61922	6.58951	6.59216	-0.00265	6.61441	6.59772	0.016686
0.084	6.81942	6.80387	6.80419	-0.00033	6.80635	6.81092	-0.00457		0.084	6.62043	6.58707	6.59204	-0.00497	6.59729	6.59767	-0.00038
0.085	6.82206	6.7979	6.804	-0.0061	6.81028	6.8109	-0.00062		0.085	6.61179	6.58766	6.59192	-0.00426	6.59349	6.59762	-0.00414
0.086	6.82185	6.80586	6.80381	0.002052	6.81706	6.81088	0.006178		0.086	6.62204	6.60233	6.59179	0.010543	6.59896	6.59758	0.001388
0.087	6.8146	6.80845	6.80361	0.004843	6.82471	6.81087	0.013848		0.087	6.62069	6.58852	6.59167	-0.00315	6.60698	6.59753	0.009455
0.088	6.82499	6.81809	6.80342	0.014675	6.81743	6.81085	0.006582		0.088	6.61633	6.59052	6.59154	-0.00103	6.60495	6.59748	0.007471
0.089	6.82479	6.81428	6.80322	0.011055	6.81402	6.81083	0.003188		0.089	6.61187	6.60002	6.59142	0.008595	6.60189	6.59743	0.00446
0.09	6.80424	6.81944	6.80303	0.016405	6.80996	6.81082	-0.00085		0.09	6.61497	6.58967	6.5913	-0.00163	6.61184	6.59738	0.014456
0.091	6.81741	6.819	6.80284	0.016157	6.80962	6.8108	-0.00118		0.091	6.61604	6.59385	6.59118	0.002674	6.58413	6.59733	-0.01321
0.092	6.80825	6.81842	6.80265	0.015769	6.81328	6.81078	0.0025		0.092	6.60946	6.59295	6.59105	0.001893	6.60046	6.59728	0.00318
0.093	6.80744	6.81471	6.80246	0.012256	6.82761	6.81076	0.01685		0.093	6.62142	6.59613	6.59093	0.005192	6.60339	6.59724	0.006155
0.094	6.79998	6.81667	6.80226	0.014405	6.81606	6.81075	0.005316		0.094	6.61773	6.58632	6.59081	-0.00449	6.59437	6.59719	-0.00282
0.095	6.82043	6.81871	6.80207	0.016636	6.82225	6.81073	0.011524		0.095	6.61632	6.59341	6.59069	0.002723	6.61254	6.59714	0.015397
0.096	6.82858	6.81153	6.80188	0.009647	6.81727	6.81071	0.006554		0.096	6.61927	6.5878	6.59057	-0.00277	6.59795	6.59709	0.000859
0.097	6.82344	6.80716	6.80169	0.005466	6.82112	6.8107	0.010423		0.097	6.62016	6.60275	6.59045	0.012306	6.58622	6.59704	-0.01082
0.098	6.82579	6.81992	6.8015	0.018418	6.80387	6.81068	-0.0068		0.098	6.62034	6.58956	6.59033	-0.00077	6.59288	6.59699	-0.00411
0.099	6.81442	6.8057	6.80131	0.004388	6.80962	6.81066	-0.00104		0.099	6.60833	6.59745	6.59021	0.007248	6.59567	6.59695	-0.00128
0.1	6.81236	6.8106	6.80112	0.009473	6.8033	6.81064	-0.00734		0.1	6.5994	6.60027	6.59009	0.010188	6.59232	6.5969	-0.00458
0.101	6.80488	6.80208	6.80093	0.001143	6.82604	6.81063	0.015416		0.101	6.61285	6.59238	6.58997	0.002414	6.60234	6.59685	0.005489
0.102	6.80819	6.80509	6.80075	0.004344	6.81658	6.81061	0.005972		0.102	6.6117	6.59806	6.58985	0.008215	6.59217	6.5968	-0.00463
0.103	6.81854	6.80453	6.80056	0.003968	6.81105	6.81059	0.000457		0.103	6.61188	6.58257	6.58973	-0.00715	6.60577	6.59675	0.009014
0.104	6.82584	6.80341	6.80037	0.00304	6.80941	6.81058	-0.00116		0.104	6.61264	6.59995	6.58961	0.010341	6.59619	6.5967	-0.00052
0.105	6.80867	6.78697	6.80018	-0.01321	6.80345	6.81056	-0.00711		0.105	6.61844	6.5947	6.58949	0.005208	6.60306	6.59666	0.0064
0.106	6.81139	6.80443	6.8	0.004438	6.82091	6.81054	0.010369		0.106	6.60819	6.59951	6.58937	0.010144	6.60254	6.59661	0.005932
0.107	6.81161	6.80182	6.79981	0.002015	6.82002	6.81052	0.009494		0.107	6.62218	6.58558	6.58925	-0.00367	6.58301	6.59656	-0.01355
0.108	6.79092	6.8039	6.79962	0.004276	6.81689	6.81051	0.006383		0.108	6.60875	6.58829	6.58913	-0.00085	6.60067	6.59651	0.004159
0.109	6.80909	6.79389	6.79944	-0.00555	6.82253	6.81049	0.012043		0.109	6.62042	6.58717	6.58902	-0.00185	6.60783	6.59646	0.011371
0.11	6.81454	6.80807	6.79925	0.008821	6.80742	6.81047	-0.00305		0.11	6.61803	6.58735	6.5889	-0.00154	6.5895	6.59641	-0.00691
0.111	6.80202	6.80481	6.79906	0.005746	6.80887	6.81046	-0.00159		0.111	6.62264	6.59896	6.58878	0.010176	6.60175	6.59637	0.005379
0.112	6.79619	6.79222	6.79888	-0.00666	6.81352	6.81044	0.003084		0.112	6.61137	6.58933	6.58866	0.000668	6.60206	6.59632	0.005738
0.113	6.81681	6.80515	6.79869	0.006451	6.8173	6.81042	0.006874		0.113	6.62127	6.58648	6.58855	-0.00207	6.58369	6.59627	-0.01258
0.114	6.81313	6.80104	6.79851	0.002529	6.80495	6.81041	-0.00546		0.114	6.61739	6.59033	6.58843	0.001896	6.60247	6.59622	0.006245
0.115	6.82372	6.80514	6.79833	0.00681	6.8076	6.81039	-0.00279		0.115	6.61239	6.59116	6.58831	0.002852	6.5963	6.59617	0.000127
0.116	6.81555	6.80405	6.79814	0.005905	6.80509	6.81037	-0.00528		0.116	6.61892	6.59728	6.5882	0.009084	6.59396	6.59613	-0.00216
0.117	6.8267	6.80346	6.79796	0.005505	6.80582	6.81035	-0.00453		0.117	6.61649	6.60006	6.58808	0.011982	6.61153	6.59608	0.015454
0.118	6.82095	6.80225	6.79778	0.00447	6.81444	6.81034	0.004101		0.118	6.61726	6.58221	6.58796	-0.00575	6.60428	6.59603	0.008245
0.119	6.82147	6.8104	6.79759	0.012806	6.81452	6.81032	0.004205		0.119	6.61447	6.59438	6.58785	0.006535	6.6103	6.59598	0.014318
0.12	6.8109	6.80098	6.79741	0.003564	6.79914	6.8103	-0.01116		0.12	6.62662	6.58976	6.58773	0.00203	6.5886	6.59593	-0.00733
0.121	6.81842	6.80428	6.79723	0.007047	6.8047	6.81029	-0.00559		0.121	6.60743	6.5852	6.58762	-0.00242	6.6035	6.59589	0.00761
0.122	6.81007	6.78717	6.79705	-0.00987	6.79771	6.81027	-0.01256		0.122	6.61246	6.58779	6.5875	0.000284	6.60065	6.59584	0.004814
0.123	6.8198	6.80385	6.79687	0.006983	6.80463	6.81025	-0.00563		0.123	6.61636	6.5843	6.58739	-0.00309	6.60692	6.59579	0.011133
0.124	6.81336	6.7973	6.79669	0.000617	6.80529	6.81024	-0.00495		0.124	6.61115	6.58909	6.58727	0.001817	6.59426	6.59574	-0.00148
0.125	6.82173	6.79592	6.79651	-0.00059	6.82071	6.81022	0.010489		0.125	6.61073	6.59564	6.58716	0.00848	6.59493	6.59569	-0.00076
0.126	6.82897	6.79164	6.79633	-0.00468	6.81139	6.8102	0.001187		0.126	6.6154	6.58967	6.58705	0.002621	6.58326	6.59565	-0.01238
0.127	6.80642	6.79672	6.79615	0.00057	6.80518	6.81018	-0.005		0.127	6.62865	6.58518	6.58693	-0.00175	6.59964	6.5956	0.004044
0.128	6.81873	6.79238	6.79597	-0.00358	6.80952	6.81017	-0.00065		0.128	6.62655	6.58437	6.58682	-0.00245	6.6086	6.59555	0.013051
0.129	6.79689	6.8004	6.79579	0.004611	6.82415	6.81015	0.014002		0.129	6.62071	6.58727	6.58671	0.000565	6.61093	6.5955	0.015428
0.13	6.81472	6.79954	6.79561	0.003927	6.82584	6.81013	0.015703		0.13	6.6113	6.60907	6.58659	0.02248	6.60097	6.59546	0.005512
0.131	6.8386	6.79008	6.79543	-0.00535	6.8069	6.81012	-0.00321		0.131	6.62667	6.60499	6.58648	0.018509	6.60485	6.59541	0.009443
0.132	6.8046	6.78404	6.79525	-0.01122	6.81063	6.8101	0.000529		0.132	6.62311	6.59831	6.58637	0.011938	6.59739	6.59536	0.002026
0.133	6.81379	6.80865	6.79507	0.013572	6.81023	6.81008	0.000149		0.133	6.61422	6.58435	6.58626	-0.00191	6.60572	6.59531	0.01041
0.134	6.81484	6.78917	6.7949	-0.00573	6.80831	6.81007	-0.00175		0.134	6.61482	6.58613	6.58614	-1.19e-05	6.59257	6.59527	-0.0027
0.135	6.82461	6.7863	6.79472	-0.00842	6.80648	6.81005	-0.00357		0.135	6.61161	6.58057	6.58603	-0.00546	6.60324	6.59522	0.008021
0.136	6.81269	6.79241	6.79454	-0.00213	6.80772	6.81003	-0.00232		0.136	6.60375	6.58742	6.58592	0.001497	6.58955	6.59517	-0.00562
0.137	6.80788	6.78609	6.79437	-0.00828	6.81355	6.81002	0.003536		0.137	6.6167	6.58816	6.58581	0.00235	6.59058	6.59512	-0.00454
0.138	6.81736	6.79801	6.79419	0.003823	6.81406	6.81	0.004062		0.138	6.60098	6.58398	6.5857	-0.00172	6.5952	6.59508	0.000127
0.139	6.82601	6.79121	6.79401	-0.0028	6.79995	6.80998	-0.01003		0.139	6.62609	6.59868	6.58559	0.013088	6.5946	6.59503	-0.00043
0.14	6.82145	6.79205	6.79384	-0.00179	6.80331	6.80996	-0.00666		0.14	6.60348	6.5871	6.58548	0.001625	6.59269	6.59498	-0.00229
0.141	6.81548	6.80208	6.79366	0.008419	6.82579	6.80995	0.015842		0.141	6.60747	6.58271	6.58537	-0.00266	6.60347	6.59493	0.00854
0.142	6.81144	6.78797	6.79349	-0.00552	6.81333	6.80993	0.003401		0.142	6.61769	6.58818	6.58526	0.002929	6.58524	6.59488	-0.00964
0.143	6.8224	6.79589	6.79331	0.002572	6.81868	6.80991	0.008762		0.143	6.61233	6.58346	6.58515	-0.00168	6.5946	6.59484	-0.00024
0.144	6.82166	6.79358	6.79314	0.000438	6.81132	6.8099	0.001421		0.144	6.61567	6.59563	6.58504	0.010598	6.59043	6.59479	-0.00436
0.145	6.80482	6.79734	6.79297	0.004373	6.80988	6.80988	7.77e-07		0.145	6.61893	6.58648	6.58493	0.001555	6.60738	6.59474	0.012637
0.146	6.80915	6.7877	6.79279	-0.00509	6.81249	6.80986	0.002624		0.146	6.61461	6.58744	6.58482	0.002627	6.5915	6.59469	-0.00319
0.147	6.82701	6.79716	6.79262	0.004542	6.81331	6.80985	0.003462		0.147	6.62912	6.58992	6.58471	0.005211	6.58959	6.59465	-0.00506
0.148	6.8077	6.78876	6.79245	-0.00368	6.8159	6.80983	0.006071		0.148	6.617	6.58769	6.5846	0.003087	6.60517	6.5946	0.010571
0.149	6.81491	6.79562	6.79227	0.003351	6.81766	6.80981	0.007849		0.149	6.60727	6.58956	6.58449	0.005066	6.60922	6.59455	0.014667
0.15	6.80722	6.78165	6.7921	-0.01045	6.80232	6.8098	-0.00747		0.15	6.61749	6.57671	6.58438	-0.00767	6.59582	6.59451	0.00131
0.151	6.81511	6.79534	6.79193	0.00341	6.80678	6.80978	-0.003		0.151	6.59473	6.58754	6.58427	0.003269	6.59926	6.59446	0.004801
0.152	6.80217	6.79	6.79176	-0.00176	6.80855	6.80976	-0.00121		0.152	6.61662	6.58703	6.58416	0.00287	6.59114	6.59441	-0.00327
0.153	6.8137	6.79272	6.79159	0.001135	6.80989	6.80975	0.000142		0.153	6.61586	6.58971	6.58406	0.005653	6.5922	6.59436	-0.00216
0.154	6.80658	6.78895	6.79142	-0.00247	6.81947	6.80973	0.009744		0.154	6.60322	6.587	6.58395	0.003052	6.58704	6.59432	-0.00727
0.155	6.81304	6.79195	6.79125	0.000707	6.81095	6.80971	0.001237		0.155	6.60536	6.58053	6.58384	-0.00332	6.59114	6.59427	-0.00313
0.156	6.81404	6.79361	6.79108	0.002532	6.82286	6.8097	0.013168		0.156	6.613	6.58561	6.58374	0.001871	6.59431	6.59422	8.75e-05
0.157	6.8157	6.78838	6.79091	-0.00253	6.80104	6.80968	-0.00864		0.157	6.61703	6.58858	6.58363	0.004951	6.58974	6.59418	-0.00444
0.158	6.82004	6.80705	6.79074	0.01631	6.79412	6.80966	-0.01554		0.158	6.60196	6.58697	6.58352	0.003445	6.59904	6.59413	0.004917
0.159	6.81601	6.78782	6.79057	-0.00274	6.80919	6.80965	-0.00046		0.159	6.62584	6.5798	6.58341	-0.00362	6.57891	6.59408	-0.01517
0.16	6.82527	6.79079	6.7904	0.000391	6.80431	6.80963	-0.00532		0.16	6.61245	6.57635	6.58331	-0.00696	6.59813	6.59403	0.004096
0.161	6.81111	6.79568	6.79023	0.005449	6.81369	6.80961	0.004074		0.161	6.60769	6.58433	6.5832	0.001132	6.59573	6.59399	0.001747
0.162	6.79549	6.78924	6.79006	-0.00082	6.82024	6.8096	0.010649		0.162	6.61989	6.58955	6.5831	0.006454	6.6107	6.59394	0.016766
0.163	6.81339	6.79152	6.78989	0.001624	6.81306	6.80958	0.003484		0.163	6.61269	6.58382	6.58299	0.000827	6.58863	6.59389	-0.00526
0.164	6.81241	6.80022	6.78972	0.010498	6.80871	6.80956	-0.00085		0.164	6.61066	6.58001	6.58289	-0.00287	6.59255	6.59385	-0.00129
0.165	6.81767	6.79625	6.78956	0.006691	6.80445	6.80955	-0.00509		0.165	6.61019	6.5909	6.58278	0.008115	6.58974	6.5938	-0.00406
0.166	6.81205	6.79809	6.78939	0.008701	6.81038	6.80953	0.000848		0.166	6.61134	6.58691	6.58268	0.004237	6.58716	6.59375	-0.00659
0.167	6.81704	6.78428	6.78922	-0.00494	6.80309	6.80951	-0.00642		0.167	6.61406	6.58227	6.58257	-0.0003	6.58603	6.5937	-0.00767
0.168	6.80518	6.78777	6.78906	-0.00129	6.80391	6.8095	-0.00559		0.168	6.60488	6.57904	6.58247	-0.00343	6.58925	6.59366	-0.00441
0.169	6.81515	6.77478	6.78889	-0.01411	6.80034	6.80948	-0.00914		0.169	6.61647	6.5883	6.58236	0.005937	6.58722	6.59361	-0.00639
0.17	6.81433	6.78565	6.78873	-0.00307	6.81042	6.80946	0.000962		0.17	6.61721	6.59077	6.58226	0.008508	6.6012	6.59356	0.007639
0.171	6.81776	6.79654	6.78856	0.007983	6.81137	6.80945	0.001923		0.171	6.61732	6.58707	6.58215	0.004912	6.59793	6.59352	0.004417
0.172	6.82055	6.77805	6.78839	-0.01034	6.81577	6.80943	0.00634		0.172	6.60803	6.58074	6.58205	-0.00132	6.59286	6.59347	-0.00061
0.173	6.81495	6.78067	6.78823	-0.00755	6.8102	6.80941	0.000784		0.173	6.61257	6.58781	6.58195	0.005864	6.59573	6.59342	0.002311
0.174	6.80544	6.79046	6.78806	0.00239	6.8131	6.80939	0.0037		0.174	6.61542	6.57848	6.58184	-0.00337	6.59935	6.59338	0.005975
0.175	6.81407	6.79342	6.7879	0.005522	6.80221	6.80938	-0.00717		0.175	6.62169	6.58029	6.58174	-0.00145	6.60606	6.59333	0.012731
0.176	6.81812	6.78649	6.78774	-0.00124	6.82905	6.80936	0.019689		0.176	6.6173	6.58952	6.58164	0.007885	6.60402	6.59328	0.010735
0.177	6.81166	6.78714	6.78757	-0.00044	6.81677	6.80934	0.007423		0.177	6.60973	6.57862	6.58153	-0.00291	6.59569	6.59324	0.00245
0.178	6.81039	6.7828	6.78741	-0.00461	6.80698	6.80933	-0.00235		0.178	6.62048	6.59063	6.58143	0.009195	6.60061	6.59319	0.007417
0.179	6.81948	6.78747	6.78725	0.000223	6.81051	6.80931	0.001197		0.179	6.61683	6.58348	6.58133	0.002149	6.59165	6.59314	-0.00149
0.18	6.82305	6.79632	6.78708	0.009236	6.81205	6.8093	0.002758		0.18	6.60934	6.59486	6.58123	0.013628	6.59898	6.5931	0.005886
0.181	6.81524	6.7817	6.78692	-0.00522	6.82124	6.80928	0.011963		0.181	6.60685	6.59217	6.58113	0.011043	6.59386	6.59305	0.000814
0.182	6.81477	6.77597	6.78676	-0.01079	6.8138	6.80926	0.004536		0.182	6.61537	6.58238	6.58102	0.001351	6.59654	6.593	0.003535
0.183	6.82116	6.77844	6.7866	-0.00816	6.80655	6.80925	-0.0027		0.183	6.608	6.57686	6.58092	-0.00406	6.59261	6.59296	-0.00035
0.184	6.8174	6.78878	6.78644	0.002346	6.80844	6.80923	-0.00078		0.184	6.61286	6.58866	6.58082	0.007833	6.60736	6.59291	0.014455
0.185	6.83491	6.79652	6.78627	0.010249	6.80589	6.80921	-0.00332		0.185	6.60926	6.57899	6.58072	-0.00173	6.59406	6.59286	0.001196
0.186	6.81222	6.7905	6.78611	0.004382	6.81933	6.8092	0.010138		0.186	6.62142	6.58055	6.58062	-7.06e-05	6.59918	6.59282	0.006364
0.187	6.81658	6.78016	6.78595	-0.0058	6.81693	6.80918	0.007752		0.187	6.61125	6.57905	6.58052	-0.00147	6.59221	6.59277	-0.00056
0.188	6.82493	6.7867	6.78579	0.000909	6.81444	6.80916	0.005273		0.188	6.6058	6.57051	6.58042	-0.00991	6.60376	6.59272	0.011037
0.189	6.81246	6.78488	6.78563	-0.00075	6.81644	6.80915	0.007297		0.189	6.6228	6.58018	6.58032	-0.00014	6.59858	6.59268	0.005904
0.19	6.80494	6.77639	6.78547	-0.00908	6.81944	6.80913	0.010313		0.19	6.60733	6.5803	6.58022	7.94e-05	6.595	6.59263	0.002373
0.191	6.80132	6.77431	6.78531	-0.011	6.80878	6.80911	-0.00033		0.191	6.62359	6.57236	6.58012	-0.00776	6.59273	6.59258	0.000145
0.192	6.80513	6.79075	6.78515	0.005601	6.80551	6.8091	-0.00359		0.192	6.61862	6.57077	6.58002	-0.00925	6.58959	6.59254	-0.00294
0.193	6.80986	6.78537	6.785	0.000373	6.8205	6.80908	0.011419		0.193	6.61328	6.57792	6.57992	-0.002	6.59371	6.59249	0.00122
0.194	6.80702	6.77913	6.78484	-0.00571	6.81316	6.80906	0.004101		0.194	6.61351	6.57066	6.57982	-0.00916	6.60102	6.59244	0.008573
0.195	6.82153	6.77712	6.78468	-0.00756	6.82014	6.80905	0.011095		0.195	6.61533	6.57246	6.57972	-0.00727	6.6053	6.5924	0.012905
0.196	6.79951	6.78778	6.78452	0.003259	6.81583	6.80903	0.006799		0.196	6.6156	6.58445	6.57962	0.004823	6.60332	6.59235	0.010967
0.197	6.82063	6.7912	6.78436	0.006837	6.80864	6.80901	-0.00038		0.197	6.61103	6.58011	6.57952	0.000588	6.59413	6.5923	0.001823
0.198	6.81584	6.78326	6.78421	-0.00095	6.82172	6.809	0.012725		0.198	6.61914	6.5822	6.57943	0.002771	6.60001	6.59226	0.007748
0.199	6.80395	6.78051	6.78405	-0.00354	6.80852	6.80898	-0.00046		0.199	6.61983	6.57025	6.57933	-0.00908	6.59607	6.59221	0.003863
0.2	6.80704	6.78581	6.78389	0.001916	6.8244	6.80896	0.015441		0.2	6.60351	6.58499	6.57923	0.005758	6.59024	6.59217	-0.00192
0.201	6.81682	6.76659	6.78374	-0.01715	6.82601	6.80895	0.01706		0.201	6.61216	6.58578	6.57913	0.006652	6.59578	6.59212	0.003666
0.202	6.81753	6.7847	6.78358	0.001123	6.81818	6.80893	0.00925		0.202	6.60984	6.57581	6.57904	-0.00323	6.58716	6.59207	-0.00492
0.203	6.83181	6.79005	6.78342	0.006631	6.81176	6.80891	0.002849		0.203	6.62372	6.58187	6.57894	0.002933	6.59391	6.59203	0.001886
0.204	6.81523	6.78185	6.78327	-0.00142	6.81649	6.8089	0.007588		0.204	6.62071	6.57502	6.57884	-0.00383	6.59328	6.59198	0.001297
0.205	6.81446	6.77599	6.78311	-0.00712	6.80927	6.80888	0.000386		0.205	6.6041	6.57736	6.57874	-0.00139	6.59054	6.59193	-0.00139
0.206	6.80129	6.78651	6.78296	0.003553	6.81719	6.80887	0.008325		0.206	6.61974	6.58282	6.57865	0.004169	6.60365	6.59189	0.01176
0.207	6.81661	6.77539	6.7828	-0.00741	6.81112	6.80885	0.002275		0.207	6.62435	6.57119	6.57855	-0.00736	6.59069	6.59184	-0.00115
0.208	6.80513	6.77531	6.78265	-0.00734	6.79793	6.80883	-0.0109		0.208	6.61275	6.57566	6.57845	-0.0028	6.59427	6.5918	0.002479
0.209	6.79598	6.784	6.78249	0.001506	6.80781	6.80882	-0.00101		0.209	6.61502	6.58219	6.57836	0.003831	6.5967	6.59175	0.004952
0.21	6.81787	6.78833	6.78234	0.005989	6.81718	6.8088	0.008381		0.21	6.62291	6.58099	6.57826	0.002731	6.59425	6.5917	0.002549
0.211	6.81796	6.7822	6.78219	1.74e-05	6.81755	6.80878	0.008765		0.211	6.6198	6.57664	6.57817	-0.00153	6.59583	6.59166	0.004174
0.212	6.82257	6.77836	6.78203	-0.00367	6.81093	6.80877	0.002165		0.212	6.60552	6.57855	6.57807	0.000479	6.60077	6.59161	0.009164
0.213	6.81622	6.77532	6.78188	-0.00656	6.80556	6.80875	-0.00319		0.213	6.60578	6.56621	6.57798	-0.01176	6.57689	6.59157	-0.01468
0.214	6.82144	6.77526	6.78173	-0.00647	6.80556	6.80873	-0.00317		0.214	6.60915	6.58316	6.57788	0.005285	6.60016	6.59152	0.008638
0.215	6.80674	6.76549	6.78158	-0.01609	6.79905	6.80872	-0.00966		0.215	6.60245	6.58167	6.57778	0.003886	6.58933	6.59147	-0.00215
0.216	6.80194	6.78947	6.78142	0.008047	6.81228	6.8087	0.003576		0.216	6.61659	6.58183	6.57769	0.004144	6.5908	6.59143	-0.00062
0.217	6.8143	6.77622	6.78127	-0.00505	6.81007	6.80868	0.001382		0.217	6.60546	6.57469	6.5776	-0.0029	6.59135	6.59138	-3.47e-05
0.218	6.80773	6.76882	6.78112	-0.0123	6.80428	6.80867	-0.00439		0.218	6.61851	6.57597	6.5775	-0.00153	6.59062	6.59133	-0.00072
0.219	6.82656	6.78462	6.78097	0.003655	6.80519	6.80865	-0.00346		0.219	6.61063	6.58132	6.57741	0.003909	6.5789	6.59129	-0.01239
0.22	6.81803	6.77683	6.78082	-0.00399	6.7992	6.80864	-0.00943		0.22	6.61128	6.59365	6.57731	0.016339	6.59516	6.59124	0.003922
0.221	6.81355	6.77956	6.78067	-0.00111	6.81566	6.80862	0.00704		0.221	6.60287	6.57521	6.57722	-0.00201	6.5994	6.5912	0.008207
0.222	6.81133	6.77305	6.78052	-0.00746	6.80589	6.8086	-0.00271		0.222	6.61477	6.5875	6.57712	0.010371	6.58796	6.59115	-0.00319
0.223	6.80532	6.78885	6.78037	0.008488	6.81261	6.80859	0.004021		0.223	6.61765	6.57331	6.57703	-0.00372	6.60487	6.59111	0.013768
0.224	6.81852	6.78257	6.78022	0.002358	6.80171	6.80857	-0.00686		0.224	6.61624	6.58262	6.57694	0.005682	6.60382	6.59106	0.012764
0.225	6.8194	6.78185	6.78007	0.001782	6.80479	6.80855	-0.00377		0.225	6.61957	6.5814	6.57685	0.004552	6.58739	6.59101	-0.00362
0.226	6.80896	6.7778	6.77992	-0.00212	6.81721	6.80854	0.008675		0.226	6.60817	6.5808	6.57675	0.00405	6.5923	6.59097	0.001333
0.227	6.81068	6.78363	6.77977	0.003863	6.8083	6.80852	-0.00022		0.227	6.61144	6.56863	6.57666	-0.00803	6.5919	6.59092	0.000981
0.228	6.81408	6.7889	6.77962	0.009276	6.81097	6.8085	0.002462		0.228	6.61314	6.58364	6.57657	0.007073	6.59235	6.59088	0.001472
0.229	6.80928	6.77696	6.77947	-0.00251	6.82069	6.80849	0.012197		0.229	6.61325	6.57235	6.57647	-0.00412	6.59336	6.59083	0.002531
0.23	6.8093	6.75913	6.77932	-0.02019	6.80909	6.80847	0.00062		0.23	6.60361	6.57701	6.57638	0.000632	6.59666	6.59078	0.005872
0.231	6.80177	6.77565	6.77918	-0.00353	6.81395	6.80846	0.005494		0.231	6.61789	6.57666	6.57629	0.000367	6.582	6.59074	-0.00874
0.232	6.8134	6.78505	6.77903	0.006026	6.81724	6.80844	0.008799		0.232	6.61144	6.56768	6.5762	-0.00852	6.59922	6.59069	0.008532
0.233	6.82555	6.77015	6.77888	-0.00873	6.81401	6.80842	0.005586		0.233	6.60814	6.56678	6.57611	-0.00933	6.58998	6.59065	-0.00067
0.234	6.82076	6.77531	6.77873	-0.00342	6.80857	6.80841	0.000162		0.234	6.61174	6.57259	6.57602	-0.00342	6.5814	6.5906	-0.0092
0.235	6.80774	6.77984	6.77859	0.001251	6.80293	6.80839	-0.00546		0.235	6.62478	6.57243	6.57592	-0.0035	6.59519	6.59056	0.004635
0.236	6.82017	6.78118	6.77844	0.002738	6.8115	6.80837	0.003122		0.236	6.61407	6.57493	6.57583	-0.00091	6.58799	6.59051	-0.00252
0.237	6.81348	6.7826	6.77829	0.00431	6.81328	6.80836	0.004918		0.237	6.6148	6.57446	6.57574	-0.00128	6.60427	6.59047	0.013805
0.238	6.80578	6.77955	6.77815	0.001405	6.8048	6.80834	-0.00354		0.238	6.62474	6.57367	6.57565	-0.00199	6.59718	6.59042	0.006756
0.239	6.81292	6.77788	6.778	-0.00012	6.81766	6.80833	0.009332		0.239	6.61263	6.58102	6.57556	0.005457	6.58867	6.59037	-0.0017
0.24	6.81653	6.7757	6.77786	-0.00215	6.81063	6.80831	0.002325		0.24	6.61242	6.57296	6.57547	-0.00251	6.58091	6.59033	-0.00941
0.241	6.81636	6.76928	6.77771	-0.00843	6.80568	6.80829	-0.00261		0.241	6.61859	6.56762	6.57538	-0.00777	6.5876	6.59028	-0.00268
0.242	6.81902	6.78437	6.77757	0.006805	6.8163	6.80828	0.008021		0.242	6.61119	6.58	6.57529	0.004708	6.58344	6.59024	-0.0068
0.243	6.8054	6.78795	6.77742	0.010528	6.80513	6.80826	-0.00313		0.243	6.61143	6.56612	6.5752	-0.00908	6.59086	6.59019	0.000664
0.244	6.8072	6.77393	6.77728	-0.00335	6.81573	6.80824	0.007489		0.244	6.60672	6.57732	6.57511	0.002206	6.5949	6.59015	0.004751
0.245	6.80028	6.77379	6.77713	-0.00335	6.81	6.80823	0.001773		0.245	6.62426	6.56956	6.57502	-0.00547	6.58803	6.5901	-0.00207
0.246	6.80399	6.77833	6.77699	0.00134	6.80771	6.80821	-0.0005		0.246	6.61264	6.57234	6.57493	-0.00259	6.58103	6.59006	-0.00903
0.247	6.82696	6.77253	6.77685	-0.00431	6.79428	6.8082	-0.01392		0.247	6.6175	6.57499	6.57484	0.000149	6.59017	6.59001	0.000156
0.248	6.81985	6.77758	6.7767	0.000874	6.79809	6.80818	-0.01009		0.248	6.61442	6.57502	6.57475	0.000264	6.58432	6.58997	-0.00565
0.249	6.80308	6.7766	6.77656	4.03e-05	6.80862	6.80816	0.000459		0.249	6.60978	6.56919	6.57467	-0.00548	6.592	6.58992	0.002078
0.25	6.79866	6.7754	6.77642	-0.00101	6.80322	6.80815	-0.00493		0.25	6.61034	6.5726	6.57458	-0.00198	6.59657	6.58987	0.006691
0.251	6.82658	6.77821	6.77627	0.001933	6.80798	6.80813	-0.00015		0.251	6.61965	6.59454	6.57449	0.020048	6.59794	6.58983	0.008107
0.252	6.80496	6.77113	6.77613	-0.005	6.79468	6.80811	-0.01343		0.252	6.61713	6.57039	6.5744	-0.00401	6.60033	6.58978	0.010548
0.253	6.81852	6.76475	6.77599	-0.01124	6.82434	6.8081	0.016241		0.253	6.62338	6.57656	6.57431	0.002244	6.6035	6.58974	0.013766
0.254	6.81244	6.76453	6.77585	-0.01132	6.80891	6.80808	0.00083		0.254	6.61233	6.57824	6.57423	0.004016	6.58442	6.58969	-0.00528
0.255	6.80946	6.77667	6.77571	0.000964	6.81633	6.80807	0.008262		0.255	6.61081	6.57031	6.57414	-0.00383	6.58689	6.58965	-0.00275
0.256	6.81489	6.77106	6.77557	-0.0045	6.81282	6.80805	0.004774		0.256	6.61177	6.5704	6.57405	-0.00365	6.59273	6.5896	0.00313
0.257	6.8163	6.77329	6.77542	-0.00213	6.80387	6.80803	-0.00416		0.257	6.61319	6.56538	6.57396	-0.00858	6.5947	6.58956	0.005146
0.258	6.81238	6.76439	6.77528	-0.01089	6.79874	6.80802	-0.00927		0.258	6.62078	6.57587	6.57388	0.001996	6.58458	6.58951	-0.00493
0.259	6.81363	6.77001	6.77514	-0.00514	6.81474	6.808	0.006742		0.259	6.61262	6.57517	6.57379	0.001378	6.59762	6.58947	0.008148
0.26	6.81248	6.77347	6.775	-0.00153	6.81072	6.80799	0.002738		0.26	6.59923	6.57881	6.5737	0.005108	6.58963	6.58942	0.000206
0.261	6.81676	6.78397	6.77486	0.009103	6.81037	6.80797	0.002398		0.261	6.60612	6.56811	6.57362	-0.00551	6.5754	6.58938	-0.01398
0.262	6.81128	6.77439	6.77472	-0.00033	6.80683	6.80795	-0.00112		0.262	6.62033	6.56655	6.57353	-0.00698	6.58824	6.58933	-0.00109
0.263	6.81897	6.78267	6.77458	0.008083	6.79973	6.80794	-0.00821		0.263	6.60267	6.56273	6.57344	-0.01072	6.58802	6.58929	-0.00127
0.264	6.82469	6.77647	6.77445	0.002021	6.80881	6.80792	0.000889		0.264	6.62974	6.57946	6.57336	0.006108	6.58381	6.58924	-0.00544
0.265	6.81044	6.76715	6.77431	-0.00715	6.80483	6.8079	-0.00307		0.265	6.62143	6.56575	6.57327	-0.00752	6.59818	6.5892	0.008986
0.266	6.79486	6.75985	6.77417	-0.01432	6.8129	6.80789	0.00501		0.266	6.61172	6.57269	6.57318	-0.0005	6.58864	6.58915	-0.00051
0.267	6.80383	6.75982	6.77403	-0.01421	6.80369	6.80787	-0.00418		0.267	6.62757	6.56632	6.5731	-0.00678	6.59646	6.58911	0.007357
0.268	6.81981	6.76621	6.77389	-0.00768	6.79737	6.80786	-0.01048		0.268	6.61401	6.57765	6.57301	0.004637	6.60048	6.58906	0.011421
0.269	6.81189	6.77968	6.77375	0.005925	6.8112	6.80784	0.003355		0.269	6.61002	6.57503	6.57293	0.002102	6.58839	6.58902	-0.00063
0.27	6.81659	6.7852	6.77362	0.011582	6.8185	6.80782	0.010678		0.27	6.61769	6.57267	6.57284	-0.00017	6.59506	6.58897	0.006083
0.271	6.81588	6.76879	6.77348	-0.00469	6.81523	6.80781	0.007419		0.271	6.62052	6.57016	6.57276	-0.0026	6.59204	6.58893	0.003115
0.272	6.80317	6.77165	6.77334	-0.00169	6.81106	6.80779	0.003271		0.272	6.61039	6.57256	6.57267	-0.00011	6.59211	6.58888	0.003226
0.273	6.79993	6.76292	6.77321	-0.01029	6.7991	6.80778	-0.00867		0.273	6.61555	6.5655	6.57259	-0.00709	6.57565	6.58884	-0.01319
0.274	6.81849	6.76411	6.77307	-0.00896	6.80791	6.80776	0.000148		0.274	6.60192	6.57116	6.57251	-0.00134	6.59084	6.58879	0.002044
0.275	6.80451	6.77485	6.77293	0.001922	6.807	6.80774	-0.00074		0.275	6.6177	6.56399	6.57242	-0.00843	6.59203	6.58875	0.003286
0.276	6.82287	6.77413	6.7728	0.001336	6.82151	6.80773	0.013785		0.276	6.61434	6.56772	6.57234	-0.00461	6.57534	6.5887	-0.01337
0.277	6.7987	6.77561	6.77266	0.002949	6.79838	6.80771	-0.00933		0.277	6.6125	6.55587	6.57225	-0.01638	6.59181	6.58866	0.003157
0.278	6.81657	6.77565	6.77253	0.003123	6.80448	6.8077	-0.00321		0.278	6.60805	6.56742	6.57217	-0.00474	6.60477	6.58861	0.016159
0.279	6.81101	6.77162	6.77239	-0.00077	6.80188	6.80768	-0.0058		0.279	6.59886	6.56937	6.57209	-0.00271	6.59114	6.58857	0.00257
0.28	6.82425	6.78187	6.77226	0.009619	6.80054	6.80766	-0.00712		0.28	6.60461	6.56991	6.572	-0.00209	6.59364	6.58852	0.005112
0.281	6.81623	6.76737	6.77212	-0.00475	6.80142	6.80765	-0.00623		0.281	6.60153	6.5769	6.57192	0.004976	6.60265	6.58848	0.014168
0.282	6.81575	6.77933	6.77199	0.007343	6.80764	6.80763	6.2e-06		0.282	6.61753	6.56191	6.57184	-0.00992	6.58553	6.58843	-0.0029
0.283	6.81547	6.77698	6.77185	0.005127	6.82108	6.80762	0.013463		0.283	6.60859	6.56682	6.57175	-0.00493	6.60111	6.58839	0.012718
0.284	6.80929	6.77548	6.77172	0.003761	6.80703	6.8076	-0.00057		0.284	6.60247	6.57997	6.57167	0.008294	6.58684	6.58834	-0.00151
0.285	6.80676	6.77364	6.77158	0.002058	6.80118	6.80758	-0.00641		0.285	6.61989	6.56565	6.57159	-0.00593	6.58812	6.5883	-0.00018
0.286	6.80586	6.78351	6.77145	0.012059	6.81172	6.80757	0.004155		0.286	6.62119	6.57169	6.57151	0.000183	6.57749	6.58826	-0.01077
0.287	6.80929	6.77814	6.77132	0.006821	6.80377	6.80755	-0.00378		0.287	6.61347	6.5778	6.57142	0.006375	6.59862	6.58821	0.010412
0.288	6.81763	6.77129	6.77118	0.000108	6.81075	6.80754	0.003217		0.288	6.61173	6.57755	6.57134	0.006204	6.58931	6.58817	0.001144
0.289	6.8143	6.7583	6.77105	-0.01275	6.79415	6.80752	-0.01337		0.289	6.6203	6.57323	6.57126	0.001973	6.58967	6.58812	0.001545
0.29	6.81998	6.769	6.77092	-0.00192	6.80435	6.8075	-0.00315		0.29	6.61049	6.57025	6.57118	-0.00093	6.58049	6.58808	-0.00759
0.291	6.82779	6.7699	6.77079	-0.00089	6.81003	6.80749	0.002543		0.291	6.62014	6.58011	6.5711	0.009011	6.59494	6.58803	0.006903
0.292	6.81098	6.77003	6.77065	-0.00062	6.81639	6.80747	0.008914		0.292	6.62756	6.56133	6.57102	-0.00968	6.59387	6.58799	0.005885
0.293	6.79948	6.77237	6.77052	0.001848	6.80826	6.80746	0.000803		0.293	6.60803	6.57802	6.57093	0.007085	6.58503	6.58794	-0.00291
0.294	6.81684	6.78033	6.77039	0.009935	6.81376	6.80744	0.006322		0.294	6.61137	6.57868	6.57085	0.007829	6.59087	6.5879	0.002972
0.295	6.80626	6.76632	6.77026	-0.00394	6.80193	6.80742	-0.00549		0.295	6.60899	6.55514	6.57077	-0.01564	6.58409	6.58785	-0.00377
0.296	6.80731	6.75876	6.77013	-0.01137	6.81576	6.80741	0.008353		0.296	6.62155	6.5739	6.57069	0.003213	6.5885	6.58781	0.000685
0.297	6.81504	6.77489	6.77	0.004895	6.81339	6.80739	0.005999		0.297	6.61382	6.57435	6.57061	0.003736	6.57411	6.58777	-0.01365
0.298	6.80158	6.76692	6.76987	-0.00295	6.8164	6.80738	0.009025		0.298	6.61757	6.57112	6.57053	0.000591	6.58855	6.58772	0.00083
0.299	6.81837	6.77736	6.76974	0.007623	6.81577	6.80736	0.008406		0.299	6.61355	6.56529	6.57045	-0.00516	6.58788	6.58768	0.000207
0.3	6.80583	6.77884	6.76961	0.009231	6.81275	6.80734	0.005408		0.3	6.6163	6.57076	6.57037	0.000388	6.59486	6.58763	0.00723
0.301	6.82078	6.76319	6.76948	-0.00629	6.81819	6.80733	0.010867		0.301	6.6107	6.57318	6.57029	0.002886	6.58953	6.58759	0.001941
0.302	6.81278	6.76143	6.76935	-0.00791	6.80433	6.80731	-0.00298		0.302	6.61824	6.57261	6.57021	0.002401	6.58315	6.58754	-0.00439
0.303	6.82097	6.75273	6.76922	-0.01649	6.79341	6.8073	-0.01389		0.303	6.60994	6.56582	6.57013	-0.00431	6.58509	6.5875	-0.00241
0.304	6.80115	6.76832	6.76909	-0.00076	6.82134	6.80728	0.014057		0.304	6.60877	6.56953	6.57005	-0.00052	6.57464	6.58746	-0.01281
0.305	6.81779	6.76989	6.76896	0.000934	6.80319	6.80726	-0.00407		0.305	6.61909	6.56575	6.56997	-0.00423	6.58742	6.58741	9.32e-06
0.306	6.81947	6.76102	6.76883	-0.00781	6.81679	6.80725	0.009537		0.306	6.60885	6.5731	6.56989	0.003209	6.58321	6.58737	-0.00416
0.307	6.82811	6.76896	6.7687	0.000252	6.80758	6.80723	0.000351		0.307	6.61484	6.56606	6.56982	-0.00375	6.59791	6.58732	0.010591
0.308	6.80437	6.77717	6.76857	0.008592	6.81363	6.80722	0.006414		0.308	6.62227	6.56285	6.56974	-0.00689	6.59176	6.58728	0.004481
0.309	6.82371	6.77605	6.76845	0.007601	6.80662	6.8072	-0.00058		0.309	6.62596	6.57523	6.56966	0.005577	6.5913	6.58723	0.004068
0.31	6.81623	6.77932	6.76832	0.010997	6.80794	6.80719	0.00075		0.31	6.59837	6.5713	6.56958	0.001716	6.58916	6.58719	0.001972
0.311	6.81132	6.75942	6.76819	-0.00877	6.80321	6.80717	-0.00396		0.311	6.60348	6.57133	6.5695	0.001825	6.58071	6.58715	-0.00644
0.312	6.81865	6.77507	6.76806	0.007009	6.80129	6.80715	-0.00586		0.312	6.60998	6.56828	6.56942	-0.00114	6.58034	6.5871	-0.00676
0.313	6.81241	6.76416	6.76794	-0.00377	6.81124	6.80714	0.004104		0.313	6.61259	6.56545	6.56934	-0.0039	6.59386	6.58706	0.006799
0.314	6.82523	6.7601	6.76781	-0.00771	6.81087	6.80712	0.003748		0.314	6.60373	6.57796	6.56927	0.008689	6.59061	6.58701	0.003601
0.315	6.82283	6.75616	6.76768	-0.01153	6.7967	6.80711	-0.0104		0.315	6.60862	6.56497	6.56919	-0.00422	6.58878	6.58697	0.001809
0.316	6.79948	6.75969	6.76756	-0.00787	6.81602	6.80709	0.008931		0.316	6.61976	6.57215	6.56911	0.003039	6.58295	6.58692	-0.00398
0.317	6.81381	6.77778	6.76743	0.01035	6.80144	6.80708	-0.00564		0.317	6.61864	6.55711	6.56903	-0.01192	6.58483	6.58688	-0.00205
0.318	6.80872	6.76882	6.76731	0.001512	6.80519	6.80706	-0.00187		0.318	6.60529	6.56609	6.56896	-0.00286	6.60524	6.58684	0.0184
0.319	6.81051	6.77403	6.76718	0.006851	6.80896	6.80704	0.001918		0.319	6.59982	6.57159	6.56888	0.002705	6.5842	6.58679	-0.00259
0.32	6.81699	6.76413	6.76706	-0.00292	6.79825	6.80703	-0.00878		0.32	6.60026	6.56277	6.5688	-0.00603	6.57956	6.58675	-0.00719
0.321	6.79831	6.77891	6.76693	0.011984	6.79515	6.80701	-0.01186		0.321	6.60689	6.57801	6.56873	0.009286	6.57548	6.58671	-0.01122
0.322	6.80566	6.76079	6.76681	-0.00601	6.81218	6.807	0.005184		0.322	6.60975	6.56607	6.56865	-0.00258	6.58951	6.58666	0.002845
0.323	6.81674	6.77189	6.76668	0.005206	6.81128	6.80698	0.004299		0.323	6.60115	6.56599	6.56857	-0.00258	6.58531	6.58662	-0.0013
0.324	6.81424	6.76654	6.76656	-2.01e-05	6.80442	6.80696	-0.00254		0.324	6.61803	6.56244	6.5685	-0.00606	6.57861	6.58657	-0.00796
0.325	6.81262	6.76847	6.76643	0.002039	6.80384	6.80695	-0.00311		0.325	6.61224	6.57018	6.56842	0.001761	6.58972	6.58653	0.003192
0.326	6.81791	6.75035	6.76631	-0.01596	6.80111	6.80693	-0.00582		0.326	6.61783	6.56811	6.56834	-0.00023	6.58829	6.58649	0.001804
0.327	6.81884	6.76807	6.76618	0.001889	6.80495	6.80692	-0.00196		0.327	6.60932	6.57013	6.56827	0.001856	6.57764	6.58644	-0.0088
0.328	6.81321	6.76267	6.76606	-0.00339	6.80538	6.8069	-0.00152		0.328	6.6055	6.5735	6.56819	0.005303	6.5809	6.5864	-0.00549
0.329	6.80584	6.76277	6.76594	-0.00317	6.80483	6.80689	-0.00206		0.329	6.60065	6.56877	6.56812	0.000653	6.59415	6.58635	0.007801
0.33	6.78546	6.76691	6.76581	0.001093	6.80064	6.80687	-0.00623		0.33	6.60441	6.56413	6.56804	-0.00391	6.58926	6.58631	0.002954
0.331	6.80826	6.76857	6.76569	0.002874	6.8028	6.80685	-0.00405		0.331	6.62135	6.56673	6.56797	-0.00123	6.58116	6.58627	-0.0051
0.332	6.81587	6.76086	6.76557	-0.00471	6.81671	6.80684	0.00987		0.332	6.61138	6.55427	6.56789	-0.01362	6.59436	6.58622	0.008138
0.333	6.80965	6.75333	6.76545	-0.01212	6.80773	6.80682	0.00091		0.333	6.60444	6.55761	6.56782	-0.01021	6.59153	6.58618	0.005347
0.334	6.80913	6.76194	6.76532	-0.00339	6.81038	6.80681	0.003575		0.334	6.61217	6.5858	6.56774	0.018059	6.59257	6.58614	0.006435
0.335	6.82172	6.76757	6.7652	0.002367	6.81256	6.80679	0.005772		0.335	6.61579	6.5581	6.56767	-0.00957	6.59729	6.58609	0.011199
0.336	6.8262	6.76312	6.76508	-0.00196	6.80971	6.80678	0.002937		0.336	6.61178	6.56317	6.56759	-0.00442	6.57825	6.58605	-0.0078
0.337	6.82917	6.7522	6.76496	-0.01276	6.81118	6.80676	0.004418		0.337	6.62128	6.57758	6.56752	0.010064	6.58864	6.586	0.00264
0.338	6.80866	6.77268	6.76484	0.007845	6.80739	6.80674	0.00065		0.338	6.6098	6.55917	6.56744	-0.00827	6.58781	6.58596	0.001847
0.339	6.81298	6.75748	6.76472	-0.00723	6.81392	6.80673	0.007195		0.339	6.61008	6.56201	6.56737	-0.00536	6.58929	6.58592	0.003378
0.34	6.82372	6.76191	6.7646	-0.00269	6.81406	6.80671	0.007344		0.34	6.62187	6.56433	6.5673	-0.00296	6.5795	6.58587	-0.00637
0.341	6.80579	6.75428	6.76448	-0.01019	6.80285	6.8067	-0.00385		0.341	6.60368	6.56303	6.56722	-0.0042	6.58468	6.58583	-0.00115
0.342	6.81081	6.76349	6.76436	-0.00087	6.79571	6.80668	-0.01097		0.342	6.62413	6.56394	6.56715	-0.00321	6.58127	6.58579	-0.00451
0.343	6.81041	6.76425	6.76424	1.21e-05	6.79399	6.80667	-0.01267		0.343	6.60228	6.57409	6.56708	0.007012	6.59438	6.58574	0.008637
0.344	6.81717	6.76254	6.76412	-0.00158	6.81645	6.80665	0.009797		0.344	6.61766	6.56294	6.567	-0.00406	6.57061	6.5857	-0.01509
0.345	6.81889	6.76252	6.764	-0.00147	6.80734	6.80663	0.000706		0.345	6.61929	6.57005	6.56693	0.00312	6.59294	6.58566	0.007284
0.346	6.81686	6.76673	6.76388	0.002851	6.80291	6.80662	-0.00371		0.346	6.6021	6.57513	6.56686	0.008272	6.57718	6.58561	-0.00843
0.347	6.81911	6.7496	6.76376	-0.01415	6.81568	6.8066	0.009076		0.347	6.60755	6.567	6.56678	0.00022	6.59574	6.58557	0.010168
0.348	6.81667	6.76941	6.76364	0.00577	6.80333	6.80659	-0.00326		0.348	6.6098	6.56287	6.56671	-0.00384	6.58948	6.58552	0.003953
0.349	6.81039	6.75842	6.76352	-0.0051	6.80601	6.80657	-0.00056		0.349	6.60755	6.55541	6.56664	-0.01123	6.57899	6.58548	-0.00649
0.35	6.81313	6.76642	6.7634	0.003022	6.81576	6.80656	0.009204		0.35	6.61589	6.56738	6.56657	0.000811	6.59201	6.58544	0.006575
0.351	6.81668	6.7576	6.76328	-0.00568	6.80174	6.80654	-0.0048		0.351	6.61906	6.55608	6.56649	-0.01042	6.58866	6.58539	0.003262
0.352	6.81923	6.75317	6.76316	-0.00999	6.79486	6.80653	-0.01166		0.352	6.60735	6.56497	6.56642	-0.00145	6.58747	6.58535	0.002114
0.353	6.81844	6.75322	6.76305	-0.00982	6.80843	6.80651	0.00192		0.353	6.60025	6.57451	6.56635	0.008162	6.58262	6.58531	-0.00268
0.354	6.81828	6.77939	6.76293	0.016464	6.79822	6.80649	-0.00827		0.354	6.62282	6.56252	6.56628	-0.00376	6.58875	6.58526	0.003481
0.355	6.80304	6.7538	6.76281	-0.00901	6.81059	6.80648	0.004109		0.355	6.6022	6.57554	6.56621	0.00933	6.58172	6.58522	-0.00351
0.356	6.82219	6.75985	6.76269	-0.00284	6.81292	6.80646	0.006454		0.356	6.61266	6.5632	6.56613	-0.00294	6.5916	6.58518	0.006424
0.357	6.81877	6.75968	6.76258	-0.0029	6.80412	6.80645	-0.00233		0.357	6.61296	6.55684	6.56606	-0.00922	6.58475	6.58513	-0.00038
0.358	6.81933	6.75862	6.76246	-0.00384	6.80053	6.80643	-0.0059		0.358	6.60349	6.56784	6.56599	0.001851	6.57591	6.58509	-0.00918
0.359	6.81982	6.75885	6.76234	-0.0035	6.81254	6.80642	0.006123		0.359	6.60674	6.57169	6.56592	0.00577	6.59548	6.58505	0.010436
0.36	6.83764	6.74825	6.76223	-0.01397	6.80372	6.8064	-0.00268		0.36	6.62289	6.57053	6.56585	0.004679	6.58332	6.585	-0.00168
0.361	6.82125	6.76157	6.76211	-0.00054	6.80679	6.80639	0.000409		0.361	6.60829	6.57219	6.56578	0.006408	6.58909	6.58496	0.004125
0.362	6.79487	6.75475	6.76199	-0.00724	6.80484	6.80637	-0.00153		0.362	6.62921	6.56145	6.56571	-0.00425	6.57917	6.58492	-0.00574
0.363	6.80854	6.75846	6.76188	-0.00342	6.81671	6.80635	0.01036		0.363	6.61245	6.5717	6.56564	0.006068	6.57864	6.58488	-0.00623
0.364	6.80619	6.75473	6.76176	-0.00703	6.80941	6.80634	0.003072		0.364	6.61661	6.5571	6.56557	-0.00847	6.58133	6.58483	-0.0035
0.365	6.80834	6.76065	6.76165	-0.001	6.8068	6.80632	0.000476		0.365	6.61678	6.56837	6.5655	0.002877	6.58465	6.58479	-0.00014
0.366	6.80188	6.76396	6.76153	0.002428	6.81569	6.80631	0.009379		0.366	6.6142	6.57358	6.56543	0.008151	6.59591	6.58475	0.011166
0.367	6.78332	6.76752	6.76142	0.006104	6.81196	6.80629	0.00567		0.367	6.61197	6.56145	6.56536	-0.0039	6.58779	6.5847	0.003092
0.368	6.81774	6.75953	6.7613	-0.00177	6.80183	6.80628	-0.00445		0.368	6.60734	6.57061	6.56529	0.005326	6.5817	6.58466	-0.00296
0.369	6.81427	6.75188	6.76119	-0.00931	6.80597	6.80626	-0.00029		0.369	6.61415	6.56365	6.56522	-0.00156	6.57816	6.58462	-0.00646
0.37	6.80197	6.75566	6.76107	-0.00541	6.79989	6.80625	-0.00635		0.37	6.59365	6.56298	6.56515	-0.00216	6.57353	6.58457	-0.01104
0.371	6.80622	6.75821	6.76096	-0.00275	6.80636	6.80623	0.000129		0.371	6.61747	6.57468	6.56508	0.009603	6.57694	6.58453	-0.00759
0.372	6.80122	6.74233	6.76085	-0.01851	6.80322	6.80621	-0.00299		0.372	6.60883	6.55833	6.56501	-0.00668	6.58387	6.58449	-0.00062
0.373	6.82503	6.76219	6.76073	0.001459	6.80474	6.8062	-0.00146		0.373	6.60008	6.57424	6.56494	0.009297	6.58441	6.58444	-3.44e-05
0.374	6.81854	6.74883	6.76062	-0.01179	6.80312	6.80618	-0.00306		0.374	6.61521	6.55878	6.56487	-0.00609	6.57553	6.5844	-0.00887
0.375	6.80071	6.75027	6.7605	-0.01023	6.80792	6.80617	0.00175		0.375	6.60919	6.56717	6.5648	0.002368	6.58915	6.58436	0.004794
0.376	6.81946	6.76371	6.76039	0.003316	6.81441	6.80615	0.008253		0.376	6.61833	6.56842	6.56473	0.003688	6.58764	6.58432	0.003329
0.377	6.82949	6.7649	6.76028	0.004617	6.81707	6.80614	0.010936		0.377	6.6083	6.55491	6.56466	-0.00975	6.58426	6.58427	-7.96e-06
0.378	6.80952	6.75436	6.76017	-0.00581	6.79393	6.80612	-0.01219		0.378	6.60955	6.56542	6.56459	0.000822	6.58974	6.58423	0.005507
0.379	6.80786	6.76186	6.76005	0.001803	6.78366	6.80611	-0.02245		0.379	6.61615	6.55713	6.56453	-0.0074	6.57201	6.58419	-0.01218
0.38	6.80643	6.75684	6.75994	-0.0031	6.80564	6.80609	-0.00045		0.38	6.6011	6.56405	6.56446	-0.00041	6.572	6.58414	-0.01214
0.381	6.82623	6.75741	6.75983	-0.00242	6.80339	6.80608	-0.00269		0.381	6.60677	6.57122	6.56439	0.006827	6.58852	6.5841	0.004421
0.382	6.81156	6.75584	6.75972	-0.00388	6.81191	6.80606	0.005854		0.382	6.60778	6.55901	6.56432	-0.00531	6.58687	6.58406	0.002816
0.383	6.82218	6.76154	6.75961	0.001936	6.80681	6.80604	0.000767		0.383	6.60175	6.56433	6.56425	7.91e-05	6.58832	6.58402	0.004303
0.384	6.82222	6.75993	6.75949	0.000439	6.80817	6.80603	0.002141		0.384	6.60313	6.55694	6.56419	-0.00724	6.59315	6.58397	0.009176
0.385	6.80732	6.76039	6.75938	0.001009	6.81112	6.80601	0.005108		0.385	6.6168	6.55932	6.56412	-0.0048	6.58616	6.58393	0.00223
0.386	6.81661	6.74361	6.75927	-0.01566	6.80586	6.806	-0.00014		0.386	6.60588	6.5764	6.56405	0.012354	6.59346	6.58389	0.009576
0.387	6.80751	6.75646	6.75916	-0.0027	6.80944	6.80598	0.003454		0.387	6.61564	6.56317	6.56398	-0.00081	6.58997	6.58384	0.006127
0.388	6.81006	6.75162	6.75905	-0.00744	6.80459	6.80597	-0.00138		0.388	6.61054	6.55989	6.56392	-0.00403	6.58652	6.5838	0.002716
0.389	6.81212	6.77034	6.75894	0.011395	6.80809	6.80595	0.002139		0.389	6.60534	6.55277	6.56385	-0.01108	6.58767	6.58376	0.003914
0.39	6.81426	6.75642	6.75883	-0.00241	6.80975	6.80594	0.003817		0.39	6.62157	6.55987	6.56378	-0.00391	6.58676	6.58372	0.003046
0.391	6.81264	6.74066	6.75872	-0.01807	6.80203	6.80592	-0.00389		0.391	6.61408	6.56638	6.56372	0.002669	6.58696	6.58367	0.003284
0.392	6.80613	6.74759	6.75861	-0.01102	6.79185	6.80591	-0.01406		0.392	6.60762	6.56031	6.56365	-0.00334	6.59618	6.58363	0.012545
0.393	6.82269	6.7543	6.7585	-0.0042	6.80054	6.80589	-0.00536		0.393	6.62056	6.56344	6.56358	-0.00014	6.576	6.58359	-0.00759
0.394	6.7961	6.76156	6.75839	0.003173	6.79263	6.80587	-0.01324		0.394	6.60187	6.55967	6.56352	-0.00384	6.59587	6.58355	0.012326
0.395	6.80504	6.75677	6.75828	-0.00152	6.80068	6.80586	-0.00518		0.395	6.60518	6.56409	6.56345	0.000637	6.57949	6.5835	-0.00402
0.396	6.80676	6.76504	6.75817	0.006867	6.80579	6.80584	-4.94e-05		0.396	6.60714	6.56749	6.56338	0.00411	6.57959	6.58346	-0.00387
0.397	6.80363	6.75929	6.75806	0.001226	6.79865	6.80583	-0.00718		0.397	6.60017	6.56355	6.56332	0.000237	6.58394	6.58342	0.000527
0.398	6.80514	6.76234	6.75796	0.004387	6.81658	6.80581	0.010767		0.398	6.60562	6.55953	6.56325	-0.00372	6.57548	6.58337	-0.0079
0.399	6.81694	6.75876	6.75785	0.000916	6.80478	6.8058	-0.00101		0.399	6.61259	6.55247	6.56319	-0.01072	6.58635	6.58333	0.003015
0.4	6.81678	6.74741	6.75774	-0.01033	6.82246	6.80578	0.016681		0.4	6.59457	6.55134	6.56312	-0.01178	6.58746	6.58329	0.004171
0.401	6.7984	6.74163	6.75763	-0.016	6.81537	6.80577	0.009605		0.401	6.60552	6.56497	6.56305	0.001919	6.58406	6.58325	0.000813
0.402	6.80075	6.75706	6.75752	-0.00047	6.80124	6.80575	-0.00451		0.402	6.61209	6.55418	6.56299	-0.00881	6.58637	6.58321	0.003165
0.403	6.81477	6.74711	6.75742	-0.01031	6.80361	6.80574	-0.00213		0.403	6.62195	6.56938	6.56292	0.00646	6.58221	6.58316	-0.00095
0.404	6.80749	6.74814	6.75731	-0.00917	6.80689	6.80572	0.001168		0.404	6.60119	6.55682	6.56286	-0.00604	6.59047	6.58312	0.007354
0.405	6.81417	6.7663	6.7572	0.009101	6.81082	6.80571	0.005115		0.405	6.60963	6.56059	6.56279	-0.0022	6.58497	6.58308	0.001893
0.406	6.80995	6.75103	6.75709	-0.00607	6.8007	6.80569	-0.005		0.406	6.6158	6.57407	6.56273	0.011345	6.59512	6.58304	0.012088
0.407	6.81533	6.76495	6.75699	0.007963	6.80602	6.80568	0.000346		0.407	6.62161	6.56895	6.56266	0.006284	6.58484	6.58299	0.001852
0.408	6.81701	6.75958	6.75688	0.002695	6.8066	6.80566	0.000944		0.408	6.60566	6.56551	6.5626	0.002906	6.58326	6.58295	0.000314
0.409	6.81596	6.75581	6.75678	-0.00096	6.80805	6.80565	0.002402		0.409	6.61469	6.56335	6.56254	0.000813	6.58782	6.58291	0.004911
0.41	6.80357	6.76258	6.75667	0.005913	6.80636	6.80563	0.000734		0.41	6.61884	6.55088	6.56247	-0.01159	6.5776	6.58287	-0.00526
0.411	6.81054	6.75162	6.75656	-0.00495	6.80524	6.80561	-0.00037		0.411	6.622	6.54796	6.56241	-0.01444	6.58362	6.58282	0.0008
0.412	6.81712	6.75447	6.75646	-0.00198	6.81145	6.8056	0.005846		0.412	6.6213	6.55962	6.56234	-0.00273	6.58681	6.58278	0.004029
0.413	6.82326	6.76268	6.75635	0.006325	6.8142	6.80558	0.008613		0.413	6.62157	6.56351	6.56228	0.001235	6.56139	6.58274	-0.02135
0.414	6.82031	6.7562	6.75625	-4.18e-05	6.8138	6.80557	0.008228		0.414	6.61686	6.56471	6.56221	0.002492	6.58929	6.5827	0.00659
0.415	6.81643	6.7554	6.75614	-0.00074	6.80817	6.80555	0.002613		0.415	6.62178	6.56228	6.56215	0.00013	6.58199	6.58265	-0.00067
0.416	6.82031	6.75359	6.75604	-0.00244	6.81357	6.80554	0.008032		0.416	6.61792	6.56988	6.56209	0.007792	6.58215	6.58261	-0.00046
0.417	6.80873	6.75056	6.75593	-0.00537	6.79513	6.80552	-0.01039		0.417	6.61837	6.57535	6.56202	0.01333	6.58856	6.58257	0.005995
0.418	6.8131	6.75816	6.75583	0.002332	6.80869	6.80551	0.003183		0.418	6.60115	6.55617	6.56196	-0.00579	6.57596	6.58253	-0.00657
0.419	6.82079	6.75273	6.75572	-0.003	6.79158	6.80549	-0.01391		0.419	6.60336	6.56621	6.5619	0.00431	6.58967	6.58249	0.007182
0.42	6.81398	6.75365	6.75562	-0.00196	6.806	6.80548	0.000525		0.42	6.61127	6.55923	6.56183	-0.00261	6.58641	6.58244	0.003963
0.421	6.79948	6.7499	6.75551	-0.00562	6.80346	6.80546	-0.002		0.421	6.61044	6.55001	6.56177	-0.01176	6.58422	6.5824	0.001818
0.422	6.82048	6.75299	6.75541	-0.00241	6.7976	6.80545	-0.00785		0.422	6.61049	6.56901	6.56171	0.007304	6.58288	6.58236	0.000521
0.423	6.82109	6.75395	6.75531	-0.00135	6.80603	6.80543	0.000596		0.423	6.60945	6.55936	6.56165	-0.00229	6.58798	6.58232	0.00566
0.424	6.81314	6.76288	6.7552	0.007681	6.81036	6.80542	0.004942		0.424	6.60753	6.56485	6.56158	0.003268	6.58574	6.58228	0.003462
0.425	6.8167	6.7659	6.7551	0.010797	6.80559	6.8054	0.000184		0.425	6.603	6.55333	6.56152	-0.00819	6.58508	6.58223	0.002851
0.426	6.81823	6.76332	6.755	0.008327	6.80938	6.80539	0.003994		0.426	6.60684	6.55859	6.56146	-0.00287	6.58104	6.58219	-0.00115
0.427	6.82066	6.75184	6.75489	-0.00305	6.8052	6.80537	-0.00017		0.427	6.61738	6.55416	6.5614	-0.00723	6.58606	6.58215	0.003907
0.428	6.80772	6.75481	6.75479	1.83e-05	6.81313	6.80536	0.00777		0.428	6.61566	6.55916	6.56133	-0.00218	6.58884	6.58211	0.006735
0.429	6.81915	6.75299	6.75469	-0.0017	6.80596	6.80534	0.000619		0.429	6.61894	6.57057	6.56127	0.009297	6.58244	6.58207	0.000373
0.43	6.81458	6.73974	6.75458	-0.01484	6.80606	6.80533	0.00073		0.43	6.60802	6.56211	6.56121	0.000902	6.5837	6.58202	0.001674
0.431	6.80571	6.74513	6.75448	-0.00936	6.80468	6.80531	-0.00063		0.431	6.61371	6.55902	6.56115	-0.00213	6.58776	6.58198	0.005783
0.432	6.81399	6.75794	6.75438	0.003558	6.81335	6.8053	0.008053		0.432	6.62323	6.54393	6.56109	-0.01716	6.57772	6.58194	-0.00422
0.433	6.81103	6.75481	6.75428	0.000535	6.80797	6.80528	0.002694		0.433	6.60311	6.56331	6.56103	0.002284	6.59058	6.5819	0.008682
0.434	6.8173	6.74996	6.75418	-0.00422	6.81531	6.80527	0.010048		0.434	6.60368	6.55106	6.56096	-0.0099	6.58565	6.58186	0.003797
0.435	6.81843	6.75699	6.75407	0.002917	6.80172	6.80525	-0.00353		0.435	6.61938	6.55958	6.5609	-0.00133	6.59098	6.58181	0.009162
0.436	6.83075	6.74726	6.75397	-0.00671	6.80165	6.80523	-0.00359		0.436	6.60265	6.5566	6.56084	-0.00424	6.58265	6.58177	0.000881
0.437	6.80498	6.7426	6.75387	-0.01127	6.81359	6.80522	0.008367		0.437	6.60927	6.55208	6.56078	-0.0087	6.57238	6.58173	-0.00935
0.438	6.80772	6.7522	6.75377	-0.00158	6.80746	6.8052	0.002253		0.438	6.61313	6.56023	6.56072	-0.00049	6.5878	6.58169	0.006109
0.439	6.81338	6.75517	6.75367	0.001503	6.82321	6.80519	0.018021		0.439	6.60284	6.55735	6.56066	-0.00331	6.58901	6.58165	0.007368
0.44	6.82053	6.75834	6.75357	0.004768	6.80306	6.80517	-0.00211		0.44	6.61525	6.56101	6.5606	0.000416	6.57897	6.5816	-0.00263
0.441	6.81851	6.76272	6.75347	0.009252	6.80953	6.80516	0.00437		0.441	6.61303	6.55672	6.56054	-0.00382	6.58418	6.58156	0.002618
0.442	6.81322	6.7715	6.75337	0.018129	6.80647	6.80514	0.001324		0.442	6.60592	6.55614	6.56048	-0.00434	6.58387	6.58152	0.002347
0.443	6.80791	6.75152	6.75327	-0.00175	6.81617	6.80513	0.011044		0.443	6.60496	6.55891	6.56042	-0.00151	6.58384	6.58148	0.00236
0.444	6.80715	6.74893	6.75317	-0.00424	6.79574	6.80511	-0.00937		0.444	6.60843	6.5634	6.56036	0.003045	6.58894	6.58144	0.007504
0.445	6.80178	6.75478	6.75307	0.001715	6.80177	6.8051	-0.00333		0.445	6.62493	6.56002	6.5603	-0.00027	6.58495	6.5814	0.00355
0.446	6.82461	6.74948	6.75297	-0.00349	6.80395	6.80508	-0.00113		0.446	6.61516	6.5576	6.56024	-0.00264	6.57874	6.58135	-0.00262
0.447	6.80317	6.74594	6.75287	-0.00693	6.80584	6.80507	0.000768		0.447	6.60536	6.57273	6.56018	0.012553	6.58074	6.58131	-0.00057
0.448	6.81586	6.75176	6.75277	-0.00101	6.80771	6.80505	0.002656		0.448	6.6052	6.56682	6.56012	0.006706	6.57655	6.58127	-0.00472
0.449	6.80817	6.74263	6.75267	-0.01004	6.80287	6.80504	-0.00217		0.449	6.62413	6.54777	6.56006	-0.01229	6.57326	6.58123	-0.00797
0.45	6.82338	6.75614	6.75257	0.003561	6.79665	6.80502	-0.00837		0.45	6.61799	6.55926	6.56	-0.00073	6.57825	6.58119	-0.00293
0.451	6.81512	6.75731	6.75248	0.004837	6.80281	6.80501	-0.0022		0.451	6.6187	6.56117	6.55994	0.001236	6.58593	6.58115	0.00478
0.452	6.8097	6.75201	6.75238	-0.00036	6.81426	6.80499	0.009262		0.452	6.61813	6.55802	6.55988	-0.00186	6.5837	6.5811	0.002598
0.453	6.82561	6.75275	6.75228	0.000472	6.7953	6.80498	-0.00968		0.453	6.60898	6.54953	6.55982	-0.01029	6.57596	6.58106	-0.0051
0.454	6.80194	6.74905	6.75218	-0.00313	6.80181	6.80496	-0.00316		0.454	6.59703	6.55844	6.55976	-0.00132	6.57757	6.58102	-0.00345
0.455	6.80105	6.75425	6.75208	0.00217	6.79908	6.80495	-0.00587		0.455	6.60596	6.55287	6.5597	-0.00683	6.57888	6.58098	-0.0021
0.456	6.82334	6.7473	6.75199	-0.00469	6.80576	6.80493	0.00083		0.456	6.60965	6.56105	6.55964	0.001404	6.59886	6.58094	0.017922
0.457	6.80893	6.75443	6.75189	0.002538	6.79863	6.80492	-0.00629		0.457	6.62657	6.55244	6.55958	-0.00714	6.57399	6.5809	-0.00691
0.458	6.81689	6.73934	6.75179	-0.01245	6.80446	6.8049	-0.00044		0.458	6.62104	6.55652	6.55953	-0.003	6.58197	6.58086	0.001113
0.459	6.80326	6.7581	6.75169	0.006405	6.80307	6.80489	-0.00182		0.459	6.60995	6.55177	6.55947	-0.00769	6.58735	6.58081	0.006538
0.46	6.82307	6.75515	6.7516	0.003552	6.8135	6.80487	0.008627		0.46	6.61324	6.54613	6.55941	-0.01328	6.58358	6.58077	0.002809
0.461	6.81267	6.75376	6.7515	0.002265	6.79125	6.80486	-0.01361		0.461	6.62815	6.54865	6.55935	-0.0107	6.59131	6.58073	0.010577
0.462	6.81397	6.75662	6.7514	0.005221	6.80352	6.80484	-0.00133		0.462	6.60572	6.55107	6.55929	-0.00822	6.57525	6.58069	-0.00544
0.463	6.81145	6.74305	6.75131	-0.00826	6.80774	6.80483	0.002915		0.463	6.62156	6.55595	6.55923	-0.00329	6.57747	6.58065	-0.00318
0.464	6.81735	6.75358	6.75121	0.002367	6.8072	6.80481	0.00239		0.464	6.61179	6.55949	6.55918	0.000314	6.58765	6.58061	0.007045
0.465	6.8088	6.75128	6.75111	0.000162	6.80334	6.8048	-0.00146		0.465	6.61586	6.55966	6.55912	0.000545	6.57877	6.58057	-0.00179
0.466	6.80804	6.74791	6.75102	-0.0031	6.8125	6.80478	0.007718		0.466	6.60935	6.55786	6.55906	-0.00121	6.57164	6.58052	-0.00889
0.467	6.81526	6.75442	6.75092	0.003501	6.79285	6.80477	-0.01192		0.467	6.61568	6.56525	6.559	0.00625	6.58543	6.58048	0.004944
0.468	6.80697	6.76053	6.75083	0.009708	6.81311	6.80475	0.008355		0.468	6.61816	6.56598	6.55895	0.007038	6.58111	6.58044	0.000672
0.469	6.81807	6.75518	6.75073	0.004445	6.80903	6.80474	0.004296		0.469	6.60622	6.55777	6.55889	-0.00111	6.57585	6.5804	-0.00455
0.47	6.80696	6.74601	6.75064	-0.00462	6.81219	6.80472	0.007469		0.47	6.60985	6.56052	6.55883	0.001685	6.5833	6.58036	0.002939
0.471	6.82324	6.74851	6.75054	-0.00203	6.81223	6.80471	0.007522		0.471	6.61521	6.55599	6.55877	-0.00279	6.58877	6.58032	0.008453
0.472	6.81604	6.74365	6.75045	-0.0068	6.79735	6.80469	-0.00735		0.472	6.61022	6.56037	6.55872	0.001652	6.57989	6.58028	-0.00038
0.473	6.8126	6.75146	6.75035	0.001107	6.80713	6.80468	0.002454		0.473	6.6087	6.56211	6.55866	0.003454	6.57505	6.58023	-0.00519
0.474	6.81787	6.76092	6.75026	0.010662	6.81075	6.80466	0.00609		0.474	6.60308	6.5538	6.5586	-0.00481	6.58526	6.58019	0.005069
0.475	6.81701	6.75119	6.75016	0.001026	6.80219	6.80465	-0.00246		0.475	6.60982	6.56553	6.55855	0.00698	6.57771	6.58015	-0.00245
0.476	6.79913	6.74684	6.75007	-0.00323	6.81448	6.80463	0.009851		0.476	6.60528	6.56546	6.55849	0.006973	6.57946	6.58011	-0.00066
0.477	6.80781	6.75524	6.74997	0.005269	6.80601	6.80462	0.001387		0.477	6.60388	6.54748	6.55843	-0.01095	6.56283	6.58007	-0.01724
0.478	6.81439	6.75127	6.74988	0.001387	6.80678	6.8046	0.002172		0.478	6.60872	6.56388	6.55838	0.005504	6.58477	6.58003	0.004738
0.479	6.8144	6.76132	6.74979	0.011529	6.79964	6.80459	-0.00495		0.479	6.60918	6.55488	6.55832	-0.00345	6.58556	6.57999	0.005573
0.48	6.80848	6.74151	6.74969	-0.00818	6.80113	6.80457	-0.00345		0.48	6.61097	6.55411	6.55827	-0.00415	6.56272	6.57995	-0.01723
0.481	6.81627	6.76311	6.7496	0.013509	6.80313	6.80456	-0.00143		0.481	6.60655	6.55602	6.55821	-0.00219	6.58757	6.57991	0.007664
0.482	6.81634	6.7502	6.74951	0.00069	6.80519	6.80454	0.00065		0.482	6.60931	6.55665	6.55815	-0.0015	6.58061	6.57986	0.00075
0.483	6.80412	6.76708	6.74941	0.017665	6.81465	6.80453	0.01012		0.483	6.61351	6.54809	6.5581	-0.01001	6.58101	6.57982	0.001185
0.484	6.81098	6.75195	6.74932	0.002626	6.8104	6.80451	0.005885		0.484	6.60343	6.55578	6.55804	-0.00226	6.58351	6.57978	0.003723
0.485	6.81406	6.73535	6.74923	-0.01388	6.79767	6.8045	-0.00683		0.485	6.61267	6.56309	6.55799	0.005104	6.56981	6.57974	-0.00994
0.486	6.8017	6.73662	6.74914	-0.01251	6.80944	6.80448	0.004953		0.486	6.603	6.56355	6.55793	0.005614	6.5727	6.5797	-0.007
0.487	6.80157	6.73471	6.74904	-0.01433	6.80068	6.80447	-0.00379		0.487	6.61943	6.55634	6.55788	-0.00153	6.58259	6.57966	0.002931
0.488	6.82146	6.74834	6.74895	-0.00062	6.80358	6.80446	-0.00087		0.488	6.6056	6.55922	6.55782	0.001398	6.59006	6.57962	0.010446
0.489	6.80956	6.7496	6.74886	0.000738	6.79904	6.80444	-0.0054		0.489	6.6065	6.55751	6.55777	-0.00025	6.57626	6.57958	-0.00332
0.49	6.81028	6.75231	6.74877	0.003541	6.80726	6.80443	0.00284		0.49	6.60554	6.55275	6.55771	-0.00496	6.57783	6.57954	-0.00171
0.491	6.82472	6.73249	6.74868	-0.01619	6.81006	6.80441	0.005645		0.491	6.61759	6.5555	6.55766	-0.00215	6.58161	6.5795	0.002113
0.492	6.81373	6.74217	6.74858	-0.00641	6.81096	6.8044	0.006564		0.492	6.61647	6.56057	6.5576	0.002973	6.58406	6.57946	0.004603
0.493	6.82639	6.75974	6.74849	0.011249	6.81305	6.80438	0.008669		0.493	6.61134	6.55685	6.55755	-0.0007	6.58714	6.57941	0.007723
0.494	6.82172	6.73562	6.7484	-0.01278	6.81034	6.80437	0.00597		0.494	6.60156	6.5525	6.55749	-0.00499	6.57056	6.57937	-0.00881
0.495	6.81079	6.7447	6.74831	-0.00361	6.79965	6.80435	-0.0047		0.495	6.61296	6.54961	6.55744	-0.00783	6.56599	6.57933	-0.01335
0.496	6.81852	6.74741	6.74822	-0.0008	6.79866	6.80434	-0.00568		0.496	6.6165	6.56663	6.55738	0.009244	6.57795	6.57929	-0.00134
0.497	6.80347	6.74921	6.74813	0.001084	6.80958	6.80432	0.005257		0.497	6.61045	6.55988	6.55733	0.002552	6.58907	6.57925	0.009815
0.498	6.80579	6.75196	6.74804	0.003927	6.80141	6.80431	-0.00289		0.498	6.6113	6.57514	6.55727	0.017869	6.57461	6.57921	-0.0046
0.499	6.81882	6.75016	6.74795	0.002217	6.79472	6.80429	-0.00957		0.499	6.61178	6.55303	6.55722	-0.00419	6.58358	6.57917	0.004413
0.5	6.79796	6.75117	6.74786	0.003312	6.79166	6.80428	-0.01262		0.5	6.61292	6.54338	6.55717	-0.01378	6.57041	6.57913	-0.00872
0.501	6.78819	6.73777	6.74777	-0.01	6.79898	6.80426	-0.00529		0.501	6.61746	6.54603	6.55711	-0.01108	6.57582	6.57909	-0.00327
0.502	6.80906	6.74667	6.74768	-0.00101	6.80281	6.80425	-0.00144		0.502	6.60521	6.54751	6.55706	-0.00954	6.57849	6.57905	-0.00056
0.503	6.80539	6.75257	6.74759	0.004982	6.81267	6.80423	0.008438		0.503	6.59953	6.56033	6.557	0.003323	6.58073	6.57901	0.001725
0.504	6.81136	6.74772	6.7475	0.000225	6.80765	6.80422	0.00343		0.504	6.62399	6.55152	6.55695	-0.00543	6.57997	6.57897	0.001008
0.505	6.81405	6.74906	6.74741	0.001653	6.81256	6.8042	0.008358		0.505	6.61355	6.55316	6.5569	-0.00374	6.5774	6.57893	-0.00153
0.506	6.80694	6.73806	6.74732	-0.00926	6.80202	6.80419	-0.00217		0.506	6.61307	6.56471	6.55684	0.007868	6.58682	6.57888	0.007933
0.507	6.79802	6.7428	6.74723	-0.00443	6.79294	6.80417	-0.01123		0.507	6.61212	6.54753	6.55679	-0.00926	6.57486	6.57884	-0.00399
0.508	6.80139	6.75107	6.74714	0.003928	6.80043	6.80416	-0.00373		0.508	6.61636	6.56428	6.55674	0.007539	6.58073	6.5788	0.001922
0.509	6.8141	6.75395	6.74705	0.006898	6.80658	6.80414	0.00244		0.509	6.61076	6.56435	6.55668	0.007669	6.57838	6.57876	-0.00039
0.51	6.81287	6.73555	6.74696	-0.01142	6.7989	6.80413	-0.00523		0.51	6.61313	6.55241	6.55663	-0.00422	6.57656	6.57872	-0.00216
0.511	6.81739	6.74149	6.74688	-0.00539	6.79182	6.80412	-0.01229		0.511	6.61643	6.54847	6.55658	-0.00811	6.58036	6.57868	0.001673
0.512	6.82526	6.74294	6.74679	-0.00384	6.8074	6.8041	0.003298		0.512	6.60787	6.56167	6.55653	0.00514	6.57514	6.57864	-0.0035
0.513	6.82463	6.75576	6.7467	0.009063	6.80407	6.80409	-1.87e-05		0.513	6.60915	6.56938	6.55647	0.012908	6.58653	6.5786	0.007926
0.514	6.80953	6.74571	6.74661	-0.0009	6.80586	6.80407	0.001787		0.514	6.60512	6.54986	6.55642	-0.00656	6.56416	6.57856	-0.0144
0.515	6.8012	6.74152	6.74652	-0.005	6.8111	6.80406	0.007046		0.515	6.61528	6.5583	6.55637	0.001929	6.59105	6.57852	0.012534
0.516	6.81602	6.74645	6.74644	1.58e-05	6.79532	6.80404	-0.00872		0.516	6.60866	6.5545	6.55632	-0.00182	6.577	6.57848	-0.00148
0.517	6.81496	6.75868	6.74635	0.012333	6.80558	6.80403	0.001553		0.517	6.62448	6.5707	6.55626	0.014434	6.57508	6.57844	-0.00336
0.518	6.8056	6.75102	6.74626	0.004759	6.81238	6.80401	0.008364		0.518	6.60492	6.56584	6.55621	0.009624	6.5863	6.5784	0.007899
0.519	6.82634	6.75551	6.74617	0.009336	6.79593	6.804	-0.00807		0.519	6.61988	6.56179	6.55616	0.00563	6.57674	6.57836	-0.00162
0.52	6.8194	6.74362	6.74609	-0.00246	6.8068	6.80398	0.00282		0.52	6.60485	6.55589	6.55611	-0.00022	6.5746	6.57832	-0.00372
0.521	6.79848	6.73259	6.746	-0.01341	6.8166	6.80397	0.012627		0.521	6.61435	6.55714	6.55606	0.001082	6.58066	6.57828	0.002381
0.522	6.81526	6.7398	6.74591	-0.00611	6.80119	6.80395	-0.00276		0.522	6.61345	6.56304	6.556	0.007034	6.57011	6.57824	-0.00813
0.523	6.79655	6.73835	6.74583	-0.00747	6.81027	6.80394	0.006329		0.523	6.61401	6.56202	6.55595	0.006068	6.58106	6.5782	0.002862
0.524	6.81828	6.74925	6.74574	0.003511	6.80571	6.80392	0.001789		0.524	6.6058	6.55565	6.5559	-0.00026	6.57301	6.57816	-0.00515
0.525	6.82008	6.74795	6.74565	0.002295	6.79927	6.80391	-0.00464		0.525	6.62005	6.55453	6.55585	-0.00132	6.57488	6.57812	-0.00324
0.526	6.81159	6.7496	6.74557	0.004037	6.80856	6.8039	0.004666		0.526	6.61624	6.5543	6.5558	-0.0015	6.57115	6.57808	-0.00693
0.527	6.81094	6.74489	6.74548	-0.0006	6.79712	6.80388	-0.00676		0.527	6.61722	6.55502	6.55575	-0.00073	6.57172	6.57804	-0.00631
0.528	6.81938	6.74971	6.7454	0.004316	6.80229	6.80387	-0.00157		0.528	6.6056	6.56915	6.5557	0.013452	6.58427	6.578	0.006271
0.529	6.79951	6.74331	6.74531	-0.00199	6.80964	6.80385	0.005793		0.529	6.61167	6.56244	6.55564	0.006796	6.57577	6.57796	-0.00219
0.53	6.81403	6.7389	6.74522	-0.00633	6.80274	6.80384	-0.00109		0.53	6.61466	6.55603	6.55559	0.000438	6.56866	6.57792	-0.00926
0.531	6.81175	6.74751	6.74514	0.00237	6.79664	6.80382	-0.00718		0.531	6.60875	6.56576	6.55554	0.010222	6.57301	6.57788	-0.00487
0.532	6.80331	6.75244	6.74505	0.007383	6.81236	6.80381	0.008554		0.532	6.6054	6.55285	6.55549	-0.00265	6.57603	6.57783	-0.0018
0.533	6.81919	6.74341	6.74497	-0.00156	6.78971	6.80379	-0.01408		0.533	6.60567	6.55458	6.55544	-0.00086	6.56601	6.57779	-0.01179
0.534	6.80752	6.73887	6.74488	-0.00602	6.80899	6.80378	0.005208		0.534	6.60426	6.55803	6.55539	0.002643	6.57488	6.57775	-0.00287
0.535	6.80725	6.74778	6.7448	0.002985	6.80955	6.80376	0.00579		0.535	6.61806	6.54109	6.55534	-0.01425	6.57988	6.57771	0.002169
0.536	6.81969	6.74423	6.74471	-0.00048	6.7998	6.80375	-0.00395		0.536	6.61217	6.55664	6.55529	0.001352	6.5868	6.57767	0.009125
0.537	6.8119	6.74242	6.74463	-0.00221	6.80318	6.80373	-0.00055		0.537	6.6113	6.56671	6.55524	0.011474	6.57283	6.57763	-0.0048
0.538	6.81747	6.74016	6.74455	-0.00438	6.80401	6.80372	0.000293		0.538	6.61628	6.55579	6.55519	0.000598	6.57883	6.57759	0.001238
0.539	6.82004	6.74746	6.74446	0.002996	6.80308	6.80371	-0.00063		0.539	6.61519	6.54909	6.55514	-0.00605	6.59264	6.57755	0.01509
0.54	6.81182	6.74232	6.74438	-0.00206	6.79742	6.80369	-0.00627		0.54	6.61044	6.55553	6.55509	0.00044	6.58384	6.57751	0.006321
0.541	6.80487	6.74695	6.74429	0.002653	6.80761	6.80368	0.003929		0.541	6.62144	6.56196	6.55504	0.00692	6.56807	6.57747	-0.00941
0.542	6.80897	6.73698	6.74421	-0.00723	6.79566	6.80366	-0.008		0.542	6.61741	6.54456	6.55499	-0.01043	6.57734	6.57743	-9.41e-05
0.543	6.80704	6.75057	6.74413	0.006442	6.81392	6.80365	0.01027		0.543	6.61575	6.55232	6.55494	-0.00262	6.58563	6.57739	0.008233
0.544	6.80362	6.74322	6.74404	-0.00082	6.81048	6.80363	0.006843		0.544	6.60876	6.55696	6.55489	0.002065	6.58519	6.57735	0.007838
0.545	6.80576	6.75132	6.74396	0.007364	6.80461	6.80362	0.000991		0.545	6.61584	6.55403	6.55484	-0.00081	6.57484	6.57731	-0.00247
0.546	6.82372	6.74313	6.74388	-0.00075	6.81179	6.8036	0.008189		0.546	6.61022	6.55743	6.55479	0.002638	6.57777	6.57727	0.0005
0.547	6.80699	6.76107	6.74379	0.017273	6.80042	6.80359	-0.00317		0.547	6.60435	6.54724	6.55474	-0.0075	6.58041	6.57723	0.003175
0.548	6.81385	6.74736	6.74371	0.003652	6.80629	6.80357	0.002711		0.548	6.62123	6.55153	6.55469	-0.00316	6.58046	6.57719	0.00327
0.549	6.8204	6.73996	6.74363	-0.00367	6.81163	6.80356	0.008068		0.549	6.60836	6.55463	6.55464	-1.2e-05	6.5785	6.57715	0.001342
0.55	6.82104	6.73877	6.74355	-0.00478	6.80349	6.80355	-5.27e-05		0.55	6.61029	6.55134	6.55459	-0.00325	6.57511	6.57711	-0.002
0.551	6.81322	6.74533	6.74346	0.001867	6.81816	6.80353	0.014628		0.551	6.61965	6.55475	6.55455	0.000202	6.58048	6.57707	0.003406
0.552	6.81379	6.74375	6.74338	0.000363	6.80771	6.80352	0.004197		0.552	6.61605	6.5537	6.5545	-0.00079	6.57487	6.57703	-0.00217
0.553	6.80545	6.74837	6.7433	0.005069	6.79949	6.8035	-0.00401		0.553	6.6215	6.54804	6.55445	-0.00641	6.57473	6.57699	-0.00226
0.554	6.81623	6.74046	6.74322	-0.00276	6.80423	6.80349	0.000738		0.554	6.613	6.55208	6.5544	-0.00232	6.58299	6.57696	0.006035
0.555	6.82356	6.74156	6.74314	-0.00158	6.81138	6.80347	0.007906		0.555	6.60608	6.56037	6.55435	0.006015	6.57659	6.57692	-0.00033
0.556	6.80427	6.74852	6.74305	0.005467	6.80862	6.80346	0.005159		0.556	6.62628	6.56007	6.5543	0.005771	6.58188	6.57688	0.005001
0.557	6.80579	6.74113	6.74297	-0.00185	6.79675	6.80344	-0.0067		0.557	6.61376	6.55371	6.55425	-0.00054	6.57442	6.57684	-0.00242
0.558	6.80684	6.73905	6.74289	-0.00384	6.79685	6.80343	-0.00658		0.558	6.61196	6.56083	6.55421	0.006621	6.58677	6.5768	0.009976
0.559	6.81289	6.73126	6.74281	-0.01155	6.81357	6.80341	0.010152		0.559	6.60912	6.5594	6.55416	0.005244	6.57063	6.57676	-0.00613
0.56	6.80961	6.74165	6.74273	-0.00108	6.79695	6.8034	-0.00645		0.56	6.61199	6.54838	6.55411	-0.00573	6.57215	6.57672	-0.00456
0.561	6.79188	6.74193	6.74265	-0.00072	6.79586	6.80339	-0.00753		0.561	6.61269	6.55857	6.55406	0.004514	6.57775	6.57668	0.001072
0.562	6.80689	6.74189	6.74257	-0.00068	6.795	6.80337	-0.00837		0.562	6.60243	6.56301	6.55401	0.008997	6.57688	6.57664	0.000239
0.563	6.80982	6.73436	6.74249	-0.00813	6.81389	6.80336	0.010532		0.563	6.61602	6.5582	6.55396	0.004231	6.5735	6.5766	-0.0031
0.564	6.80835	6.74678	6.74241	0.004378	6.79762	6.80334	-0.00572		0.564	6.61012	6.55944	6.55392	0.005522	6.57284	6.57656	-0.00372
0.565	6.81659	6.73375	6.74233	-0.00858	6.80815	6.80333	0.004823		0.565	6.61941	6.55578	6.55387	0.001908	6.58004	6.57652	0.003524
0.566	6.80246	6.74463	6.74225	0.002382	6.80982	6.80331	0.006507		0.566	6.61397	6.55978	6.55382	0.005958	6.56819	6.57648	-0.00829
0.567	6.81611	6.74468	6.74217	0.002513	6.81178	6.8033	0.008485		0.567	6.60181	6.53945	6.55377	-0.01432	6.57941	6.57644	0.002966
0.568	6.80957	6.73932	6.74209	-0.00276	6.8028	6.80328	-0.00049		0.568	6.60975	6.55146	6.55373	-0.00227	6.57115	6.5764	-0.00525
0.569	6.81871	6.74172	6.74201	-0.00028	6.80335	6.80327	7.99e-05		0.569	6.61045	6.55114	6.55368	-0.00254	6.57025	6.57636	-0.00611
0.57	6.81337	6.73216	6.74193	-0.00976	6.79	6.80326	-0.01325		0.57	6.61437	6.55307	6.55363	-0.00057	6.57115	6.57632	-0.00517
0.571	6.81644	6.73452	6.74185	-0.00733	6.80653	6.80324	0.003288		0.571	6.62252	6.56298	6.55359	0.00939	6.57771	6.57628	0.001425
0.572	6.81181	6.74536	6.74177	0.003594	6.80592	6.80323	0.002691		0.572	6.60352	6.55704	6.55354	0.003506	6.57324	6.57624	-0.003
0.573	6.81661	6.73056	6.74169	-0.01113	6.80278	6.80321	-0.00043		0.573	6.60594	6.54845	6.55349	-0.00504	6.57476	6.5762	-0.00145
0.574	6.81642	6.7319	6.74161	-0.00971	6.80902	6.8032	0.005821		0.574	6.61961	6.54681	6.55344	-0.00664	6.56746	6.57616	-0.0087
0.575	6.80308	6.74711	6.74153	0.005579	6.81173	6.80318	0.008547		0.575	6.60817	6.55989	6.5534	0.00649	6.57357	6.57612	-0.00255
0.576	6.81016	6.74601	6.74145	0.004561	6.79297	6.80317	-0.0102		0.576	6.61111	6.55806	6.55335	0.00471	6.58256	6.57608	0.006474
0.577	6.81139	6.7414	6.74137	2.38e-05	6.80614	6.80316	0.002983		0.577	6.61656	6.55429	6.5533	0.000985	6.57427	6.57604	-0.00177
0.578	6.82214	6.756	6.7413	0.014705	6.80597	6.80314	0.002826		0.578	6.60659	6.56074	6.55326	0.007478	6.58418	6.576	0.008178
0.579	6.81759	6.74265	6.74122	0.001435	6.80596	6.80313	0.002836		0.579	6.60956	6.55347	6.55321	0.000262	6.57864	6.57597	0.002679
0.58	6.81833	6.74075	6.74114	-0.00039	6.80789	6.80311	0.00478		0.58	6.61249	6.5499	6.55317	-0.00326	6.56739	6.57593	-0.00853
0.581	6.81511	6.73745	6.74106	-0.00361	6.8038	6.8031	0.000701		0.581	6.60303	6.55545	6.55312	0.00233	6.5836	6.57589	0.007709
0.582	6.80235	6.74198	6.74098	0.000993	6.80986	6.80308	0.006778		0.582	6.5963	6.55318	6.55307	0.000106	6.57633	6.57585	0.000485
0.583	6.81594	6.73646	6.7409	-0.00444	6.80508	6.80307	0.002008		0.583	6.61265	6.55526	6.55303	0.002235	6.57542	6.57581	-0.00038
0.584	6.80424	6.75202	6.74083	0.011189	6.79797	6.80305	-0.00508		0.584	6.60454	6.55261	6.55298	-0.00037	6.56954	6.57577	-0.00623
0.585	6.81847	6.75178	6.74075	0.011034	6.80187	6.80304	-0.00117		0.585	6.61695	6.54987	6.55294	-0.00307	6.5682	6.57573	-0.00753
0.586	6.80909	6.75488	6.74067	0.014212	6.8162	6.80303	0.013175		0.586	6.61183	6.55187	6.55289	-0.00102	6.5714	6.57569	-0.00429
0.587	6.81993	6.75174	6.7406	0.011148	6.80412	6.80301	0.001106		0.587	6.60645	6.55224	6.55284	-0.00061	6.58657	6.57565	0.010916
0.588	6.80759	6.74314	6.74052	0.002625	6.79342	6.803	-0.00957		0.588	6.60686	6.53785	6.5528	-0.01495	6.58258	6.57561	0.006969
0.589	6.80218	6.74786	6.74044	0.007419	6.81407	6.80298	0.011084		0.589	6.61723	6.55374	6.55275	0.000986	6.57623	6.57557	0.000654
0.59	6.80875	6.74886	6.74036	0.008493	6.8096	6.80297	0.006632		0.59	6.60674	6.54891	6.55271	-0.0038	6.57314	6.57553	-0.0024
0.591	6.8177	6.73608	6.74029	-0.00421	6.80519	6.80295	0.002235		0.591	6.61415	6.54688	6.55266	-0.00578	6.58255	6.57549	0.007054
0.592	6.79789	6.7502	6.74021	0.009994	6.8051	6.80294	0.002165		0.592	6.61113	6.55821	6.55262	0.005596	6.56604	6.57546	-0.00941
0.593	6.79938	6.73854	6.74013	-0.00159	6.8032	6.80293	0.000272		0.593	6.604	6.5545	6.55257	0.001933	6.57306	6.57542	-0.00236
0.594	6.81492	6.74155	6.74006	0.001493	6.80535	6.80291	0.002437		0.594	6.61499	6.55761	6.55253	0.005081	6.56665	6.57538	-0.00873
0.595	6.80878	6.72916	6.73998	-0.01083	6.79684	6.8029	-0.00606		0.595	6.61806	6.55087	6.55248	-0.00161	6.57948	6.57534	0.004141
0.596	6.81948	6.73477	6.73991	-0.00514	6.80629	6.80288	0.003412		0.596	6.62477	6.55133	6.55244	-0.0011	6.58845	6.5753	0.013149
0.597	6.82431	6.75153	6.73983	0.011705	6.80499	6.80287	0.002117		0.597	6.61409	6.54317	6.55239	-0.00922	6.57651	6.57526	0.001251
0.598	6.80587	6.74857	6.73975	0.008813	6.8105	6.80285	0.007647		0.598	6.61592	6.55803	6.55235	0.00568	6.57253	6.57522	-0.00269
0.599	6.81288	6.75588	6.73968	0.0162	6.79307	6.80284	-0.00977		0.599	6.60002	6.55218	6.5523	-0.00012	6.5736	6.57518	-0.00158
0.6	6.81266	6.74158	6.7396	0.001978	6.80579	6.80283	0.002961		0.6	6.60691	6.55063	6.55226	-0.00163	6.57585	6.57514	0.000704
0.601	6.82772	6.74847	6.73953	0.00894	6.79015	6.80281	-0.01266		0.601	6.59958	6.55111	6.55221	-0.00111	6.56756	6.5751	-0.00755
0.602	6.82482	6.74492	6.73945	0.005463	6.79572	6.8028	-0.00708		0.602	6.61253	6.55352	6.55217	0.001354	6.57532	6.57506	0.000251
0.603	6.80411	6.74168	6.73938	0.002305	6.79769	6.80278	-0.00509		0.603	6.61531	6.56789	6.55212	0.015762	6.56254	6.57503	-0.01249
0.604	6.80251	6.73794	6.7393	-0.00136	6.80191	6.80277	-0.00086		0.604	6.61588	6.55086	6.55208	-0.00122	6.57514	6.57499	0.000151
0.605	6.79242	6.74295	6.73923	0.003722	6.79149	6.80275	-0.01127		0.605	6.6204	6.55045	6.55203	-0.00158	6.5769	6.57495	0.001957
0.606	6.8087	6.73331	6.73915	-0.00584	6.79607	6.80274	-0.00667		0.606	6.61688	6.55333	6.55199	0.001336	6.56771	6.57491	-0.0072
0.607	6.80717	6.7364	6.73908	-0.00268	6.80787	6.80273	0.005145		0.607	6.6113	6.53635	6.55195	-0.01559	6.57771	6.57487	0.002836
0.608	6.80692	6.74309	6.739	0.00409	6.80582	6.80271	0.003107		0.608	6.61453	6.55143	6.5519	-0.00047	6.56933	6.57483	-0.0055
0.609	6.81001	6.72446	6.73893	-0.01447	6.79505	6.8027	-0.00765		0.609	6.60378	6.55557	6.55186	0.003713	6.5689	6.57479	-0.0059
0.61	6.7987	6.73601	6.73886	-0.00284	6.79638	6.80268	-0.00631		0.61	6.6111	6.55339	6.55181	0.001576	6.5736	6.57475	-0.00116
0.611	6.80412	6.7462	6.73878	0.007422	6.78716	6.80267	-0.01551		0.611	6.6224	6.54648	6.55177	-0.00529	6.56919	6.57471	-0.00552
0.612	6.81477	6.73983	6.73871	0.001123	6.79303	6.80266	-0.00963		0.612	6.60801	6.55128	6.55173	-0.00044	6.57163	6.57467	-0.00305
0.613	6.81543	6.73338	6.73863	-0.00525	6.80185	6.80264	-0.00079		0.613	6.61413	6.55294	6.55168	0.001258	6.56347	6.57464	-0.01116
0.614	6.80588	6.7317	6.73856	-0.00686	6.81271	6.80263	0.010081		0.614	6.61497	6.54896	6.55164	-0.00268	6.57045	6.5746	-0.00414
0.615	6.82218	6.73033	6.73849	-0.00816	6.79909	6.80261	-0.00352		0.615	6.6128	6.5499	6.5516	-0.00169	6.56812	6.57456	-0.00644
0.616	6.80401	6.73318	6.73841	-0.00524	6.80171	6.8026	-0.00088		0.616	6.61914	6.54344	6.55155	-0.00811	6.57125	6.57452	-0.00327
0.617	6.79645	6.74162	6.73834	0.003279	6.79133	6.80258	-0.01125		0.617	6.61105	6.54446	6.55151	-0.00705	6.58512	6.57448	0.010634
0.618	6.80007	6.72564	6.73827	-0.01263	6.78765	6.80257	-0.01492		0.618	6.61144	6.54322	6.55147	-0.00825	6.57075	6.57444	-0.00369
0.619	6.81343	6.73872	6.73819	0.000528	6.80188	6.80256	-0.00068		0.619	6.61638	6.55299	6.55142	0.001563	6.56034	6.5744	-0.01407
0.62	6.81396	6.73132	6.73812	-0.00681	6.80444	6.80254	0.001896		0.62	6.60975	6.55949	6.55138	0.008104	6.576	6.57437	0.001633
0.621	6.80008	6.73505	6.73805	-0.003	6.80338	6.80253	0.000848		0.621	6.626	6.55601	6.55134	0.004672	6.58041	6.57433	0.006083
0.622	6.8129	6.73235	6.73798	-0.00563	6.80255	6.80251	3.53e-05		0.622	6.60934	6.55874	6.5513	0.007446	6.5629	6.57429	-0.01139
0.623	6.81342	6.7389	6.7379	0.000994	6.79725	6.8025	-0.00525		0.623	6.60085	6.54659	6.55125	-0.00467	6.57886	6.57425	0.004611
0.624	6.82009	6.74093	6.73783	0.003101	6.8095	6.80249	0.007019		0.624	6.61435	6.55724	6.55121	0.006032	6.57421	6.57421	-3.37e-06
0.625	6.81734	6.73369	6.73776	-0.00407	6.79698	6.80247	-0.00549		0.625	6.61618	6.53875	6.55117	-0.01241	6.57851	6.57417	0.004343
0.626	6.80953	6.7324	6.73769	-0.00529	6.807	6.80246	0.004543		0.626	6.60374	6.54365	6.55113	-0.00748	6.58141	6.57413	0.007273
0.627	6.82879	6.74376	6.73761	0.006145	6.80062	6.80244	-0.00183		0.627	6.60631	6.55214	6.55108	0.001057	6.57062	6.57409	-0.00348
0.628	6.81456	6.72605	6.73754	-0.01149	6.80387	6.80243	0.001442		0.628	6.60767	6.55035	6.55104	-0.00069	6.56548	6.57406	-0.00857
0.629	6.81221	6.73137	6.73747	-0.0061	6.80611	6.80242	0.003694		0.629	6.6108	6.55499	6.551	0.003988	6.56623	6.57402	-0.00779
0.63	6.81479	6.74595	6.7374	0.008547	6.80857	6.8024	0.006166		0.63	6.6058	6.56924	6.55096	0.018287	6.57004	6.57398	-0.00394
0.631	6.80509	6.73281	6.73733	-0.00451	6.80607	6.80239	0.003682		0.631	6.6137	6.5609	6.55091	0.009987	6.57007	6.57394	-0.00387
0.632	6.81489	6.72643	6.73726	-0.01083	6.80749	6.80237	0.00512		0.632	6.6079	6.5423	6.55087	-0.00857	6.57715	6.5739	0.003247
0.633	6.80108	6.73295	6.73719	-0.00424	6.8042	6.80236	0.001843		0.633	6.61916	6.54807	6.55083	-0.00276	6.57271	6.57386	-0.00116
0.634	6.81709	6.72631	6.73711	-0.01081	6.80324	6.80234	0.000894		0.634	6.62151	6.54516	6.55079	-0.00563	6.57526	6.57382	0.001432
0.635	6.80025	6.73853	6.73704	0.001488	6.79991	6.80233	-0.00242		0.635	6.60348	6.55524	6.55075	0.004496	6.56876	6.57379	-0.00503
0.636	6.81856	6.73647	6.73697	-0.0005	6.79466	6.80232	-0.00765		0.636	6.5983	6.54771	6.5507	-0.00299	6.56719	6.57375	-0.00656
0.637	6.81454	6.73295	6.7369	-0.00395	6.81048	6.8023	0.008176		0.637	6.60463	6.54217	6.55066	-0.00849	6.57339	6.57371	-0.00031
0.638	6.80706	6.72538	6.73683	-0.01145	6.79294	6.80229	-0.00935		0.638	6.62306	6.54645	6.55062	-0.00417	6.56797	6.57367	-0.0057
0.639	6.80632	6.74325	6.73676	0.006491	6.80842	6.80227	0.006149		0.639	6.60679	6.55432	6.55058	0.003744	6.58337	6.57363	0.009741
0.64	6.81263	6.73879	6.73669	0.002098	6.78979	6.80226	-0.01247		0.64	6.61548	6.53812	6.55054	-0.01242	6.58854	6.57359	0.014945
0.641	6.80663	6.73714	6.73662	0.000523	6.80172	6.80225	-0.00053		0.641	6.61113	6.54756	6.5505	-0.00293	6.57032	6.57356	-0.00324
0.642	6.81833	6.73666	6.73655	0.000108	6.80136	6.80223	-0.00087		0.642	6.62814	6.54845	6.55046	-0.002	6.57839	6.57352	0.00487
0.643	6.81394	6.72556	6.73648	-0.01092	6.79503	6.80222	-0.00719		0.643	6.6148	6.55308	6.55042	0.002662	6.56854	6.57348	-0.00493
0.644	6.81168	6.73126	6.73641	-0.00516	6.81302	6.8022	0.01082		0.644	6.60569	6.55233	6.55037	0.001955	6.56937	6.57344	-0.00407
0.645	6.80674	6.74548	6.73634	0.009136	6.80191	6.80219	-0.00028		0.645	6.60843	6.55362	6.55033	0.003285	6.56345	6.5734	-0.00995
0.646	6.81342	6.73483	6.73627	-0.00144	6.80473	6.80218	0.002552		0.646	6.60953	6.53638	6.55029	-0.01391	6.57654	6.57336	0.003177
0.647	6.80992	6.7347	6.7362	-0.0015	6.80506	6.80216	0.002897		0.647	6.6011	6.54662	6.55025	-0.00364	6.56812	6.57333	-0.00521
0.648	6.81702	6.73856	6.73613	0.002425	6.80318	6.80215	0.001029		0.648	6.613	6.5418	6.55021	-0.00841	6.56201	6.57329	-0.01128
0.649	6.81789	6.73291	6.73606	-0.00315	6.80697	6.80213	0.004835		0.649	6.60372	6.54915	6.55017	-0.00102	6.57229	6.57325	-0.00096
0.65	6.80948	6.71886	6.73599	-0.01714	6.79032	6.80212	-0.0118		0.65	6.61381	6.55026	6.55013	0.000129	6.57751	6.57321	0.004296
0.651	6.82909	6.72679	6.73592	-0.00913	6.78514	6.80211	-0.01696		0.651	6.61396	6.55279	6.55009	0.002701	6.56634	6.57317	-0.00684
0.652	6.79839	6.74023	6.73586	0.004372	6.79972	6.80209	-0.00237		0.652	6.61371	6.55698	6.55005	0.006932	6.58143	6.57314	0.008296
0.653	6.81694	6.74382	6.73579	0.008029	6.80478	6.80208	0.002702		0.653	6.61149	6.55428	6.55001	0.004269	6.57388	6.5731	0.000784
0.654	6.81687	6.73697	6.73572	0.001249	6.80351	6.80206	0.001449		0.654	6.6133	6.54473	6.54997	-0.00524	6.56778	6.57306	-0.00527
0.655	6.81291	6.74064	6.73565	0.004994	6.80321	6.80205	0.001163		0.655	6.61808	6.54451	6.54993	-0.00542	6.57148	6.57302	-0.00154
0.656	6.81417	6.73527	6.73558	-0.00031	6.79768	6.80204	-0.00435		0.656	6.62106	6.55161	6.54989	0.00172	6.57547	6.57298	0.002487
0.657	6.8161	6.73331	6.73551	-0.0022	6.80356	6.80202	0.001536		0.657	6.60771	6.55187	6.54985	0.002024	6.55998	6.57294	-0.01297
0.658	6.8149	6.73089	6.73545	-0.00455	6.81176	6.80201	0.009752		0.658	6.60775	6.54441	6.54981	-0.0054	6.57369	6.57291	0.000786
0.659	6.80593	6.7272	6.73538	-0.00818	6.79744	6.80199	-0.00455		0.659	6.61445	6.5474	6.54977	-0.00237	6.57754	6.57287	0.004667
0.66	6.79177	6.74392	6.73531	0.008609	6.81117	6.80198	0.009192		0.66	6.60805	6.54319	6.54973	-0.00654	6.57383	6.57283	0.001
0.661	6.7966	6.72957	6.73524	-0.00567	6.78628	6.80197	-0.01568		0.661	6.60539	6.55587	6.54969	0.006185	6.57535	6.57279	0.002562
0.662	6.81309	6.73703	6.73517	0.00186	6.79928	6.80195	-0.00267		0.662	6.59689	6.55207	6.54965	0.002425	6.57771	6.57275	0.004959
0.663	6.81261	6.74315	6.73511	0.008046	6.80825	6.80194	0.006307		0.663	6.60591	6.55083	6.54961	0.001223	6.57439	6.57272	0.001671
0.664	6.80914	6.7407	6.73504	0.005662	6.80048	6.80192	-0.00145		0.664	6.61423	6.56135	6.54957	0.011781	6.58164	6.57268	0.008962
0.665	6.81265	6.73654	6.73497	0.001571	6.80837	6.80191	0.006455		0.665	6.61168	6.5505	6.54953	0.000969	6.57038	6.57264	-0.00226
0.666	6.82055	6.73418	6.7349	-0.00073	6.80253	6.8019	0.000629		0.666	6.60441	6.55464	6.54949	0.005149	6.56961	6.5726	-0.00299
0.667	6.81436	6.73295	6.73484	-0.00189	6.79125	6.80188	-0.01063		0.667	6.62035	6.5526	6.54945	0.003146	6.58992	6.57256	0.017358
0.668	6.80869	6.7325	6.73477	-0.00227	6.80593	6.80187	0.004066		0.668	6.60125	6.55618	6.54941	0.006766	6.57335	6.57253	0.000828
0.669	6.81425	6.74869	6.7347	0.013982	6.81098	6.80186	0.009127		0.669	6.60831	6.54615	6.54937	-0.00322	6.57864	6.57249	0.006148
0.67	6.81502	6.73846	6.73464	0.003826	6.79547	6.80184	-0.00637		0.67	6.60486	6.5427	6.54933	-0.00663	6.56279	6.57245	-0.00966
0.671	6.8133	6.73061	6.73457	-0.00396	6.79578	6.80183	-0.00605		0.671	6.60616	6.54881	6.54929	-0.00049	6.58157	6.57241	0.009153
0.672	6.80417	6.73192	6.7345	-0.00259	6.7936	6.80181	-0.00822		0.672	6.61375	6.55672	6.54925	0.007467	6.57724	6.57238	0.004866
0.673	6.81966	6.7306	6.73444	-0.00384	6.80713	6.8018	0.005335		0.673	6.61471	6.53741	6.54922	-0.0118	6.56955	6.57234	-0.00279
0.674	6.80138	6.73836	6.73437	0.003986	6.8019	6.80179	0.000112		0.674	6.61783	6.54217	6.54918	-0.00701	6.57956	6.5723	0.007263
0.675	6.79819	6.73952	6.7343	0.005219	6.81004	6.80177	0.008269		0.675	6.61212	6.52867	6.54914	-0.02046	6.57038	6.57226	-0.00188
0.676	6.82126	6.72524	6.73424	-0.009	6.79304	6.80176	-0.00872		0.676	6.60536	6.55331	6.5491	0.004207	6.57538	6.57222	0.003152
0.677	6.81333	6.74039	6.73417	0.006218	6.80392	6.80174	0.002175		0.677	6.5964	6.54485	6.54906	-0.00421	6.57193	6.57219	-0.00026
0.678	6.80675	6.73437	6.73411	0.000266	6.79708	6.80173	-0.00465		0.678	6.61565	6.55539	6.54902	0.006366	6.58146	6.57215	0.009312
0.679	6.82461	6.7264	6.73404	-0.00764	6.79418	6.80172	-0.00754		0.679	6.59293	6.54154	6.54898	-0.00744	6.58234	6.57211	0.010232
0.68	6.81477	6.73197	6.73398	-0.00201	6.80842	6.8017	0.006716		0.68	6.61083	6.54758	6.54894	-0.00137	6.56822	6.57207	-0.00385
0.681	6.80902	6.74101	6.73391	0.007102	6.80556	6.80169	0.003867		0.681	6.60556	6.54391	6.54891	-0.00499	6.57473	6.57204	0.002698
0.682	6.79771	6.7387	6.73384	0.00485	6.79807	6.80167	-0.0036		0.682	6.60178	6.54382	6.54887	-0.00505	6.57664	6.572	0.00464
0.683	6.82156	6.74381	6.73378	0.010032	6.7991	6.80166	-0.00257		0.683	6.61835	6.54638	6.54883	-0.00245	6.5747	6.57196	0.002737
0.684	6.81132	6.71943	6.73371	-0.01428	6.81679	6.80165	0.01514		0.684	6.60978	6.54365	6.54879	-0.00514	6.57009	6.57192	-0.00183
0.685	6.80373	6.72673	6.73365	-0.00692	6.79188	6.80163	-0.00976		0.685	6.61307	6.55156	6.54875	0.002803	6.563	6.57188	-0.00889
0.686	6.79911	6.74543	6.73358	0.011842	6.79664	6.80162	-0.00498		0.686	6.59887	6.54674	6.54872	-0.00198	6.54997	6.57185	-0.02188
0.687	6.80869	6.74347	6.73352	0.009951	6.80754	6.80161	0.00593		0.687	6.6094	6.55805	6.54868	0.009373	6.56621	6.57181	-0.0056
0.688	6.80381	6.729	6.73345	-0.00445	6.79455	6.80159	-0.00704		0.688	6.61384	6.54602	6.54864	-0.00262	6.56699	6.57177	-0.00478
0.689	6.82287	6.73705	6.73339	0.003661	6.81567	6.80158	0.014096		0.689	6.6141	6.54497	6.5486	-0.00363	6.57693	6.57173	0.005196
0.69	6.81867	6.7417	6.73333	0.008369	6.81308	6.80156	0.011519		0.69	6.61215	6.53804	6.54856	-0.01052	6.58606	6.5717	0.014366
0.691	6.79757	6.73335	6.73326	8.98e-05	6.80243	6.80155	0.000876		0.691	6.61382	6.55016	6.54853	0.001634	6.57028	6.57166	-0.00138
0.692	6.80968	6.72181	6.7332	-0.01139	6.79631	6.80154	-0.00523		0.692	6.60927	6.54845	6.54849	-4.29e-05	6.57117	6.57162	-0.00045
0.693	6.79706	6.72431	6.73313	-0.00882	6.80238	6.80152	0.000854		0.693	6.62064	6.56407	6.54845	0.015614	6.57217	6.57158	0.000586
0.694	6.82268	6.72486	6.73307	-0.00821	6.80962	6.80151	0.008112		0.694	6.61375	6.54075	6.54841	-0.00767	6.57053	6.57155	-0.00101
0.695	6.81337	6.72734	6.73301	-0.00567	6.79926	6.8015	-0.00224		0.695	6.60578	6.55507	6.54838	0.006689	6.57705	6.57151	0.005546
0.696	6.81641	6.73297	6.73294	2.37e-05	6.80132	6.80148	-0.00016		0.696	6.62109	6.54922	6.54834	0.000879	6.57218	6.57147	0.000708
0.697	6.80073	6.73129	6.73288	-0.00159	6.80256	6.80147	0.001096		0.697	6.60861	6.54732	6.5483	-0.00098	6.57643	6.57143	0.005
0.698	6.81324	6.72638	6.73281	-0.00644	6.80064	6.80145	-0.00081		0.698	6.6021	6.54038	6.54826	-0.00788	6.57509	6.5714	0.003695
0.699	6.82306	6.73906	6.73275	0.006304	6.79488	6.80144	-0.00656		0.699	6.60318	6.55848	6.54823	0.010248	6.5727	6.57136	0.001345
0.7	6.80524	6.73873	6.73269	0.006043	6.80238	6.80143	0.000957		0.7	6.61244	6.54534	6.54819	-0.00285	6.56859	6.57132	-0.00273
0.701	6.80757	6.73452	6.73262	0.001899	6.80573	6.80141	0.004313		0.701	6.61102	6.5587	6.54815	0.010551	6.56958	6.57128	-0.00171
0.702	6.81442	6.71971	6.73256	-0.01285	6.80343	6.8014	0.002034		0.702	6.60493	6.53917	6.54812	-0.00894	6.57038	6.57125	-0.00087
0.703	6.8091	6.72913	6.7325	-0.00337	6.80461	6.80139	0.003223		0.703	6.61433	6.53612	6.54808	-0.01196	6.5612	6.57121	-0.01001
0.704	6.8176	6.73278	6.73243	0.000341	6.79554	6.80137	-0.00583		0.704	6.60882	6.54276	6.54804	-0.00528	6.5667	6.57117	-0.00447
0.705	6.80738	6.73221	6.73237	-0.00016	6.80559	6.80136	0.004228		0.705	6.61812	6.55222	6.54801	0.004216	6.57758	6.57113	0.006441
0.706	6.80141	6.73588	6.73231	0.003569	6.79861	6.80134	-0.00274		0.706	6.61229	6.54617	6.54797	-0.0018	6.56735	6.5711	-0.00375
0.707	6.8052	6.73218	6.73225	-7.02e-05	6.79506	6.80133	-0.00627		0.707	6.615	6.5467	6.54793	-0.00123	6.57172	6.57106	0.000659
0.708	6.80686	6.73775	6.73218	0.005567	6.80959	6.80132	0.008274		0.708	6.61117	6.54237	6.5479	-0.00553	6.57588	6.57102	0.004854
0.709	6.82444	6.739	6.73212	0.00688	6.79265	6.8013	-0.00865		0.709	6.60962	6.54723	6.54786	-0.00063	6.58074	6.57099	0.009759
0.71	6.81386	6.7335	6.73206	0.001438	6.80043	6.80129	-0.00086		0.71	6.6089	6.54351	6.54782	-0.00431	6.55974	6.57095	-0.0112
0.711	6.8019	6.72578	6.732	-0.00621	6.79362	6.80128	-0.00766		0.711	6.61119	6.548	6.54779	0.000209	6.58453	6.57091	0.013615
0.712	6.79732	6.73442	6.73194	0.002482	6.80681	6.80126	0.00555		0.712	6.62127	6.54921	6.54775	0.00146	6.57028	6.57087	-0.00059
0.713	6.80804	6.72229	6.73187	-0.00958	6.80286	6.80125	0.001608		0.713	6.61766	6.54656	6.54772	-0.00115	6.57294	6.57084	0.002104
0.714	6.81744	6.73687	6.73181	0.005059	6.8008	6.80123	-0.00044		0.714	6.61356	6.53838	6.54768	-0.0093	6.57369	6.5708	0.002893
0.715	6.81363	6.72573	6.73175	-0.00602	6.80299	6.80122	0.001768		0.715	6.60539	6.55229	6.54764	0.004651	6.55354	6.57076	-0.01722
0.716	6.8098	6.73253	6.73169	0.000839	6.79984	6.80121	-0.00136		0.716	6.61329	6.55167	6.54761	0.004066	6.57116	6.57072	0.000432
0.717	6.80283	6.73472	6.73163	0.003098	6.80182	6.80119	0.000629		0.717	6.62461	6.54944	6.54757	0.00187	6.56641	6.57069	-0.00427
0.718	6.80815	6.73724	6.73157	0.005677	6.79992	6.80118	-0.00126		0.718	6.61391	6.54231	6.54753	-0.00522	6.56548	6.57065	-0.00517
0.719	6.81819	6.71584	6.7315	-0.01566	6.80436	6.80117	0.00319		0.719	6.61049	6.53803	6.5475	-0.00947	6.5635	6.57061	-0.00712
0.72	6.81725	6.73431	6.73144	0.00287	6.80135	6.80115	0.000198		0.72	6.60309	6.54131	6.54746	-0.00615	6.56802	6.57058	-0.00256
0.721	6.81532	6.74011	6.73138	0.008731	6.79232	6.80114	-0.00882		0.721	6.60892	6.55184	6.54743	0.004408	6.56182	6.57054	-0.00872
0.722	6.82126	6.73553	6.73132	0.004208	6.79961	6.80113	-0.00151		0.722	6.6161	6.5495	6.54739	0.002108	6.56961	6.5705	-0.00089
0.723	6.82364	6.73308	6.73126	0.00182	6.79211	6.80111	-0.009		0.723	6.61068	6.53814	6.54736	-0.00922	6.56997	6.57047	-0.0005
0.724	6.8115	6.7263	6.7312	-0.0049	6.81048	6.8011	0.009385		0.724	6.60561	6.54608	6.54732	-0.00124	6.56585	6.57043	-0.00458
0.725	6.81215	6.73374	6.73114	0.002604	6.79805	6.80109	-0.00304		0.725	6.60699	6.53553	6.54729	-0.01175	6.56903	6.57039	-0.00136
0.726	6.81178	6.73648	6.73108	0.005401	6.79431	6.80107	-0.00676		0.726	6.61167	6.54284	6.54725	-0.00441	6.56731	6.57035	-0.00304
0.727	6.79353	6.73582	6.73102	0.004803	6.79909	6.80106	-0.00197		0.727	6.60068	6.55532	6.54722	0.00811	6.55934	6.57032	-0.01098
0.728	6.82124	6.72515	6.73096	-0.00581	6.80411	6.80104	0.003064		0.728	6.61292	6.5521	6.54718	0.004925	6.56769	6.57028	-0.00259
0.729	6.81987	6.72956	6.7309	-0.00134	6.80392	6.80103	0.002887		0.729	6.61192	6.55049	6.54714	0.003342	6.56611	6.57024	-0.00413
0.73	6.80563	6.74119	6.73084	0.010356	6.80865	6.80102	0.007631		0.73	6.61367	6.5444	6.54711	-0.00271	6.56324	6.57021	-0.00697
0.731	6.81704	6.73724	6.73078	0.006468	6.80991	6.801	0.008906		0.731	6.61233	6.55058	6.54707	0.00351	6.57128	6.57017	0.001107
0.732	6.8204	6.72937	6.73072	-0.00135	6.79807	6.80099	-0.00292		0.732	6.60808	6.54283	6.54704	-0.00421	6.5614	6.57013	-0.00873
0.733	6.81264	6.7261	6.73066	-0.00455	6.79963	6.80098	-0.00135		0.733	6.60921	6.54147	6.547	-0.00554	6.57435	6.5701	0.004253
0.734	6.82172	6.73558	6.7306	0.004979	6.79495	6.80096	-0.00601		0.734	6.61454	6.53673	6.54697	-0.01024	6.56958	6.57006	-0.00048
0.735	6.81978	6.72962	6.73054	-0.00092	6.78955	6.80095	-0.0114		0.735	6.6002	6.53735	6.54693	-0.00959	6.56269	6.57002	-0.00734
0.736	6.82021	6.73453	6.73048	0.004056	6.79642	6.80094	-0.00452		0.736	6.60198	6.54871	6.5469	0.001805	6.57617	6.56999	0.006186
0.737	6.81543	6.72614	6.73042	-0.00428	6.79861	6.80092	-0.00232		0.737	6.61417	6.54716	6.54687	0.00029	6.58032	6.56995	0.010372
0.738	6.80237	6.74076	6.73036	0.010403	6.80146	6.80091	0.000547		0.738	6.61189	6.54797	6.54683	0.001141	6.56621	6.56991	-0.0037
0.739	6.81054	6.73083	6.7303	0.000534	6.8028	6.80089	0.001901		0.739	6.60748	6.54817	6.5468	0.001372	6.57565	6.56987	0.005773
0.74	6.80654	6.72682	6.73024	-0.00342	6.80474	6.80088	0.003857		0.74	6.61818	6.54896	6.54676	0.002202	6.56445	6.56984	-0.00538
0.741	6.80022	6.73481	6.73018	0.004626	6.7895	6.80087	-0.01136		0.741	6.61738	6.55382	6.54673	0.007094	6.56918	6.5698	-0.00063
0.742	6.80789	6.73899	6.73012	0.008872	6.80666	6.80085	0.005804		0.742	6.61436	6.53478	6.54669	-0.01191	6.57257	6.56976	0.002804
0.743	6.81411	6.73062	6.73006	0.000553	6.79764	6.80084	-0.0032		0.743	6.61258	6.54609	6.54666	-0.00057	6.5743	6.56973	0.004571
0.744	6.80285	6.72535	6.73001	-0.00466	6.80663	6.80083	0.005807		0.744	6.61342	6.54692	6.54663	0.000292	6.56893	6.56969	-0.00076
0.745	6.81392	6.73942	6.72995	0.009471	6.79803	6.80081	-0.00278		0.745	6.61139	6.55119	6.54659	0.004596	6.56093	6.56965	-0.00872
0.746	6.80665	6.73979	6.72989	0.009897	6.80286	6.8008	0.00206		0.746	6.60512	6.55503	6.54656	0.00847	6.5577	6.56962	-0.01192
0.747	6.82151	6.7325	6.72983	0.002673	6.81456	6.80079	0.013774		0.747	6.6022	6.53352	6.54652	-0.013	6.56949	6.56958	-8.98e-05
0.748	6.82293	6.7441	6.72977	0.014327	6.80005	6.80077	-0.00072		0.748	6.60351	6.55246	6.54649	0.00597	6.56917	6.56954	-0.00037
0.749	6.80407	6.72862	6.72971	-0.0011	6.78769	6.80076	-0.01307		0.749	6.60856	6.5398	6.54645	-0.00666	6.56753	6.56951	-0.00198
0.75	6.82853	6.7378	6.72965	0.008149	6.80011	6.80075	-0.00063		0.75	6.618	6.5517	6.54642	0.005274	6.57938	6.56947	0.009911
0.751	6.80652	6.72822	6.7296	-0.00138	6.80006	6.80073	-0.00067		0.751	6.60088	6.54842	6.54639	0.002033	6.56165	6.56943	-0.00778
0.752	6.80837	6.72214	6.72954	-0.0074	6.79406	6.80072	-0.00666		0.752	6.59851	6.54799	6.54635	0.001636	6.57397	6.5694	0.004576
0.753	6.82158	6.73355	6.72948	0.004068	6.80646	6.80071	0.005749		0.753	6.60544	6.54123	6.54632	-0.00509	6.57669	6.56936	0.007327
0.754	6.81862	6.72946	6.72942	3.62e-05	6.79486	6.80069	-0.00583		0.754	6.60622	6.53676	6.54629	-0.00952	6.57342	6.56932	0.004092
0.755	6.80627	6.72813	6.72937	-0.00123	6.80463	6.80068	0.003953		0.755	6.60739	6.54241	6.54625	-0.00384	6.57673	6.56929	0.007441
0.756	6.80544	6.73211	6.72931	0.002798	6.79922	6.80067	-0.00145		0.756	6.59966	6.53873	6.54622	-0.00749	6.56726	6.56925	-0.00199
0.757	6.81366	6.73721	6.72925	0.007958	6.80028	6.80065	-0.00037		0.757	6.60465	6.54239	6.54619	-0.0038	6.57781	6.56922	0.008594
0.758	6.81917	6.72806	6.72919	-0.00114	6.80246	6.80064	0.001817		0.758	6.61706	6.55268	6.54615	0.006523	6.56276	6.56918	-0.00642
0.759	6.81462	6.73559	6.72914	0.00645	6.79352	6.80062	-0.0071		0.759	6.61304	6.54183	6.54612	-0.00429	6.5679	6.56914	-0.00124
0.76	6.81243	6.73068	6.72908	0.0016	6.79397	6.80061	-0.00664		0.76	6.60597	6.54146	6.54609	-0.00463	6.57674	6.56911	0.007638
0.761	6.82105	6.72795	6.72902	-0.00107	6.79809	6.8006	-0.00251		0.761	6.61499	6.54942	6.54605	0.003364	6.5589	6.56907	-0.01017
0.762	6.80754	6.72633	6.72897	-0.00263	6.8016	6.80058	0.001012		0.762	6.61237	6.54587	6.54602	-0.00015	6.55525	6.56903	-0.01378
0.763	6.80611	6.7278	6.72891	-0.00111	6.7916	6.80057	-0.00897		0.763	6.61936	6.53418	6.54599	-0.01181	6.57159	6.569	0.00259
0.764	6.82056	6.73361	6.72885	0.004754	6.8065	6.80056	0.005941		0.764	6.61491	6.54139	6.54595	-0.00456	6.56513	6.56896	-0.00383
0.765	6.82074	6.73496	6.72879	0.006166	6.80154	6.80054	0.000991		0.765	6.60412	6.54062	6.54592	-0.0053	6.57247	6.56892	0.003545
0.766	6.81438	6.73215	6.72874	0.003412	6.80065	6.80053	0.000118		0.766	6.62441	6.54308	6.54589	-0.00281	6.57103	6.56889	0.002146
0.767	6.82206	6.73052	6.72868	0.001841	6.78973	6.80052	-0.01079		0.767	6.62536	6.53981	6.54585	-0.00605	6.56618	6.56885	-0.00267
0.768	6.81872	6.72926	6.72863	0.000639	6.81132	6.8005	0.01082		0.768	6.61032	6.54944	6.54582	0.003615	6.56295	6.56881	-0.00586
0.769	6.79951	6.7275	6.72857	-0.00107	6.8007	6.80049	0.000207		0.769	6.61009	6.54972	6.54579	0.003927	6.58062	6.56878	0.011842
0.77	6.82065	6.72009	6.72851	-0.00842	6.79305	6.80048	-0.00743		0.77	6.60309	6.54838	6.54576	0.00262	6.56806	6.56874	-0.00069
0.771	6.80631	6.72583	6.72846	-0.00263	6.78264	6.80046	-0.01783		0.771	6.61882	6.54914	6.54572	0.003418	6.57214	6.56871	0.003431
0.772	6.79986	6.73398	6.7284	0.005578	6.80194	6.80045	0.001486		0.772	6.60857	6.54527	6.54569	-0.00042	6.58793	6.56867	0.019264
0.773	6.81384	6.73764	6.72835	0.009292	6.79678	6.80044	-0.00365		0.773	6.60318	6.54606	6.54566	0.000396	6.56738	6.56863	-0.00125
0.774	6.80322	6.72813	6.72829	-0.00016	6.80359	6.80042	0.003166		0.774	6.61108	6.54354	6.54563	-0.00208	6.56682	6.5686	-0.00178
0.775	6.80213	6.74087	6.72823	0.012632	6.79977	6.80041	-0.00064		0.775	6.60741	6.55347	6.54559	0.007874	6.56707	6.56856	-0.00149
0.776	6.81417	6.73158	6.72818	0.003398	6.79628	6.8004	-0.00412		0.776	6.60044	6.54073	6.54556	-0.00483	6.57974	6.56852	0.011219
0.777	6.80353	6.71607	6.72812	-0.01205	6.79591	6.80038	-0.00448		0.777	6.60511	6.5455	6.54553	-3.17e-05	6.57027	6.56849	0.001784
0.778	6.80741	6.74102	6.72807	0.012954	6.80858	6.80037	0.008208		0.778	6.6059	6.5328	6.5455	-0.0127	6.57974	6.56845	0.011283
0.779	6.81695	6.72323	6.72801	-0.00478	6.80061	6.80036	0.000257		0.779	6.60688	6.55468	6.54547	0.009216	6.56801	6.56842	-0.00041
0.78	6.80614	6.73187	6.72796	0.003918	6.80058	6.80034	0.000239		0.78	6.61074	6.55272	6.54543	0.00729	6.56875	6.56838	0.000369
0.781	6.81169	6.72628	6.7279	-0.00162	6.80365	6.80033	0.003318		0.781	6.61501	6.54498	6.5454	-0.00042	6.57322	6.56834	0.004878
0.782	6.81892	6.72028	6.72785	-0.00757	6.79685	6.80032	-0.00346		0.782	6.61184	6.53907	6.54537	-0.0063	6.58103	6.56831	0.012727
0.783	6.81018	6.73332	6.72779	0.005532	6.79761	6.8003	-0.00269		0.783	6.61405	6.55008	6.54534	0.004738	6.56841	6.56827	0.000139
0.784	6.82032	6.72251	6.72774	-0.00522	6.79323	6.80029	-0.00706		0.784	6.62546	6.55533	6.54531	0.010029	6.56857	6.56823	0.000333
0.785	6.82799	6.72433	6.72768	-0.00335	6.80345	6.80028	0.003174		0.785	6.61365	6.56757	6.54527	0.022299	6.55885	6.5682	-0.00935
0.786	6.80849	6.73406	6.72763	0.006434	6.79027	6.80026	-0.00999		0.786	6.60889	6.5374	6.54524	-0.00784	6.56429	6.56816	-0.00388
0.787	6.80581	6.73629	6.72757	0.008714	6.79893	6.80025	-0.00132		0.787	6.61501	6.55164	6.54521	0.006432	6.56381	6.56813	-0.00432
0.788	6.81274	6.72665	6.72752	-0.00087	6.7949	6.80024	-0.00534		0.788	6.61296	6.53565	6.54518	-0.00953	6.57675	6.56809	0.008656
0.789	6.80865	6.72741	6.72746	-5.82e-05	6.79867	6.80022	-0.00156		0.789	6.61289	6.54931	6.54515	0.004161	6.5623	6.56805	-0.00575
0.79	6.8134	6.72801	6.72741	0.000602	6.81434	6.80021	0.014128		0.79	6.60646	6.55621	6.54512	0.011092	6.57345	6.56802	0.005434
0.791	6.80989	6.73012	6.72735	0.002764	6.81141	6.8002	0.011211		0.791	6.60817	6.53015	6.54508	-0.01494	6.56731	6.56798	-0.00068
0.792	6.8141	6.73724	6.7273	0.009944	6.79082	6.80018	-0.00936		0.792	6.61563	6.55337	6.54505	0.008315	6.56244	6.56795	-0.00551
0.793	6.80869	6.7273	6.72725	5.1e-05	6.80284	6.80017	0.002665		0.793	6.61161	6.5446	6.54502	-0.00042	6.56802	6.56791	0.000105
0.794	6.80899	6.72776	6.72719	0.000564	6.80324	6.80016	0.003086		0.794	6.60902	6.54532	6.54499	0.00033	6.56568	6.56787	-0.00219
0.795	6.80548	6.72401	6.72714	-0.00313	6.79144	6.80014	-0.0087		0.795	6.60674	6.55439	6.54496	0.009435	6.56348	6.56784	-0.00436
0.796	6.82263	6.7267	6.72709	-0.00039	6.79125	6.80013	-0.00888		0.796	6.61009	6.54109	6.54493	-0.00384	6.56664	6.5678	-0.00116
0.797	6.81101	6.73643	6.72703	0.009402	6.79486	6.80012	-0.00525		0.797	6.6034	6.54018	6.5449	-0.00472	6.57185	6.56777	0.004087
0.798	6.83062	6.73038	6.72698	0.003403	6.80133	6.8001	0.001222		0.798	6.60511	6.53429	6.54487	-0.01057	6.57089	6.56773	0.003161
0.799	6.81052	6.71955	6.72692	-0.00737	6.79998	6.80009	-0.00011		0.799	6.60441	6.54407	6.54483	-0.00076	6.55972	6.5677	-0.00797
0.8	6.8077	6.72599	6.72687	-0.00088	6.7915	6.80008	-0.00858		0.8	6.60429	6.55092	6.5448	0.006111	6.56095	6.56766	-0.00671
0.801	6.81033	6.7195	6.72682	-0.00731	6.79618	6.80006	-0.00388		0.801	6.61105	6.54846	6.54477	0.00369	6.57203	6.56762	0.004406
0.802	6.80644	6.72896	6.72676	0.002192	6.80254	6.80005	0.00249		0.802	6.60616	6.54733	6.54474	0.002584	6.56906	6.56759	0.001477
0.803	6.81152	6.72336	6.72671	-0.00335	6.80359	6.80004	0.003554		0.803	6.61766	6.54358	6.54471	-0.00113	6.57199	6.56755	0.004443
0.804	6.80399	6.72339	6.72666	-0.00327	6.80543	6.80003	0.00541		0.804	6.60303	6.54978	6.54468	0.005098	6.57757	6.56752	0.010055
0.805	6.80552	6.71597	6.72661	-0.01063	6.80267	6.80001	0.00266		0.805	6.61479	6.54639	6.54465	0.001735	6.56262	6.56748	-0.00487
0.806	6.81075	6.71936	6.72655	-0.00719	6.79869	6.8	-0.00131		0.806	6.61762	6.55319	6.54462	0.008569	6.56701	6.56744	-0.00043
0.807	6.82383	6.72847	6.7265	0.001966	6.79981	6.79999	-0.00017		0.807	6.62499	6.54395	6.54459	-0.00064	6.57512	6.56741	0.007708
0.808	6.82146	6.72864	6.72645	0.002197	6.79927	6.79997	-0.0007		0.808	6.60584	6.53525	6.54456	-0.00931	6.56129	6.56737	-0.00609
0.809	6.81205	6.72348	6.72639	-0.00292	6.80066	6.79996	0.0007		0.809	6.61858	6.5463	6.54453	0.001768	6.56289	6.56734	-0.00444
0.81	6.80645	6.73151	6.72634	0.005168	6.78795	6.79995	-0.01199		0.81	6.60025	6.54004	6.5445	-0.00446	6.55516	6.5673	-0.01214
0.811	6.81509	6.72702	6.72629	0.000732	6.79763	6.79993	-0.00231		0.811	6.62233	6.54545	6.54447	0.000987	6.56244	6.56727	-0.00483
0.812	6.81712	6.72809	6.72624	0.00185	6.79562	6.79992	-0.0043		0.812	6.61299	6.55327	6.54444	0.008838	6.56495	6.56723	-0.00228
0.813	6.81656	6.73368	6.72619	0.007491	6.80403	6.79991	0.004124		0.813	6.60641	6.53865	6.54441	-0.00575	6.55925	6.56719	-0.00795
0.814	6.8135	6.72778	6.72613	0.001646	6.81334	6.79989	0.013452		0.814	6.60941	6.54268	6.54438	-0.00169	6.56016	6.56716	-0.007
0.815	6.82272	6.73177	6.72608	0.005686	6.7957	6.79988	-0.00418		0.815	6.60123	6.54171	6.54435	-0.00264	6.57035	6.56712	0.00323
0.816	6.81925	6.73184	6.72603	0.005812	6.80501	6.79987	0.005139		0.816	6.61111	6.54364	6.54432	-0.00068	6.56588	6.56709	-0.0012
0.817	6.81891	6.71286	6.72598	-0.01312	6.79718	6.79985	-0.00268		0.817	6.60989	6.54738	6.54429	0.003098	6.56974	6.56705	0.002691
0.818	6.81372	6.72724	6.72593	0.001312	6.79954	6.79984	-0.0003		0.818	6.61474	6.54684	6.54426	0.002583	6.5621	6.56702	-0.00492
0.819	6.80965	6.72843	6.72587	0.002559	6.80001	6.79983	0.000187		0.819	6.61393	6.53892	6.54423	-0.00531	6.55993	6.56698	-0.00705
0.82	6.79876	6.72291	6.72582	-0.00291	6.80611	6.79981	0.006295		0.82	6.60506	6.53802	6.5442	-0.00618	6.57108	6.56695	0.004133
0.821	6.82016	6.73537	6.72577	0.009595	6.79996	6.7998	0.000159		0.821	6.60636	6.55292	6.54417	0.00875	6.57675	6.56691	0.009839
0.822	6.81232	6.7182	6.72572	-0.00752	6.80576	6.79979	0.005971		0.822	6.61506	6.54488	6.54414	0.000747	6.56927	6.56687	0.002391
0.823	6.80965	6.72432	6.72567	-0.00135	6.79644	6.79977	-0.00333		0.823	6.60631	6.5416	6.54411	-0.00251	6.57579	6.56684	0.008952
0.824	6.80501	6.72114	6.72562	-0.00448	6.78632	6.79976	-0.01344		0.824	6.61421	6.54051	6.54408	-0.00357	6.56162	6.5668	-0.00518
0.825	6.79718	6.7271	6.72557	0.001538	6.79872	6.79975	-0.00103		0.825	6.6162	6.53989	6.54405	-0.00415	6.56669	6.56677	-7.42e-05
0.826	6.80915	6.72804	6.72551	0.002522	6.79391	6.79974	-0.00582		0.826	6.60745	6.54687	6.54402	0.002849	6.57847	6.56673	0.011741
0.827	6.81001	6.72239	6.72546	-0.00308	6.79778	6.79972	-0.00194		0.827	6.60832	6.54458	6.54399	0.000592	6.57345	6.5667	0.006757
0.828	6.79821	6.7284	6.72541	0.002987	6.79531	6.79971	-0.0044		0.828	6.61941	6.55308	6.54396	0.009118	6.55293	6.56666	-0.01373
0.829	6.8184	6.72817	6.72536	0.002807	6.799	6.7997	-0.0007		0.829	6.60922	6.55088	6.54393	0.006949	6.55531	6.56663	-0.01131
0.83	6.81733	6.73388	6.72531	0.008572	6.79405	6.79968	-0.00563		0.83	6.60883	6.54288	6.5439	-0.00102	6.55929	6.56659	-0.0073
0.831	6.80453	6.7268	6.72526	0.001536	6.7904	6.79967	-0.00926		0.831	6.61019	6.54343	6.54387	-0.00044	6.56328	6.56656	-0.00327
0.832	6.80711	6.73333	6.72521	0.008119	6.79816	6.79966	-0.00149		0.832	6.61047	6.54621	6.54384	0.002369	6.5633	6.56652	-0.00322
0.833	6.79852	6.72544	6.72516	0.000286	6.80687	6.79964	0.007224		0.833	6.61538	6.53734	6.54381	-0.00648	6.56635	6.56648	-0.00014
0.834	6.79982	6.72874	6.72511	0.003635	6.80707	6.79963	0.007441		0.834	6.60032	6.54821	6.54378	0.004431	6.57285	6.56645	0.006401
0.835	6.80339	6.73091	6.72506	0.005854	6.79968	6.79962	6.04e-05		0.835	6.60463	6.54771	6.54375	0.003959	6.56189	6.56641	-0.00452
0.836	6.80659	6.73085	6.72501	0.005838	6.80293	6.7996	0.003326		0.836	6.60784	6.54109	6.54372	-0.00263	6.55688	6.56638	-0.0095
0.837	6.80714	6.72984	6.72496	0.004879	6.79751	6.79959	-0.00208		0.837	6.6051	6.54122	6.5437	-0.00247	6.56427	6.56634	-0.00207
0.838	6.81338	6.72523	6.72491	0.000326	6.80435	6.79958	0.004777		0.838	6.61327	6.5491	6.54367	0.00543	6.5678	6.56631	0.00149
0.839	6.80952	6.7286	6.72486	0.003739	6.79634	6.79956	-0.00322		0.839	6.61003	6.5434	6.54364	-0.00024	6.56997	6.56627	0.003699
0.84	6.8134	6.72204	6.72481	-0.00277	6.80142	6.79955	0.001865		0.84	6.60725	6.53886	6.54361	-0.00475	6.57634	6.56624	0.010098
0.841	6.80231	6.72673	6.72476	0.001971	6.80773	6.79954	0.008193		0.841	6.6149	6.55776	6.54358	0.014183	6.58578	6.5662	0.019575
0.842	6.82024	6.7059	6.72471	-0.01881	6.80576	6.79953	0.006235		0.842	6.61386	6.53524	6.54355	-0.00832	6.55524	6.56617	-0.01093
0.843	6.81181	6.71782	6.72466	-0.00684	6.7906	6.79951	-0.00891		0.843	6.59946	6.54899	6.54352	0.00547	6.55698	6.56613	-0.00915
0.844	6.80634	6.72903	6.72461	0.004419	6.80051	6.7995	0.001007		0.844	6.6073	6.54044	6.54349	-0.00306	6.56247	6.5661	-0.00363
0.845	6.80838	6.71651	6.72456	-0.00804	6.80199	6.79949	0.002508		0.845	6.61004	6.55992	6.54347	0.016452	6.56821	6.56606	0.002151
0.846	6.82557	6.73017	6.72451	0.005657	6.79193	6.79947	-0.00754		0.846	6.61106	6.54688	6.54344	0.003447	6.55355	6.56603	-0.01247
0.847	6.81136	6.72539	6.72446	0.000928	6.8018	6.79946	0.002335		0.847	6.60787	6.55205	6.54341	0.008645	6.56915	6.56599	0.003159
0.848	6.79241	6.72854	6.72441	0.004133	6.8037	6.79945	0.004254		0.848	6.61876	6.54732	6.54338	0.003936	6.56501	6.56596	-0.00094
0.849	6.80845	6.72304	6.72436	-0.00132	6.80026	6.79943	0.000828		0.849	6.60592	6.54684	6.54335	0.003484	6.57021	6.56592	0.004293
0.85	6.82244	6.72604	6.72431	0.001725	6.79305	6.79942	-0.00638		0.85	6.61475	6.53749	6.54332	-0.00583	6.56116	6.56589	-0.00473
0.851	6.83974	6.72498	6.72426	0.000714	6.7898	6.79941	-0.00961		0.851	6.60346	6.55172	6.5433	0.008423	6.57417	6.56585	0.008315
0.852	6.81828	6.72681	6.72421	0.002595	6.79434	6.7994	-0.00505		0.852	6.59896	6.54958	6.54327	0.006308	6.56699	6.56582	0.001178
0.853	6.81028	6.71822	6.72417	-0.00595	6.80469	6.79938	0.005311		0.853	6.60145	6.53759	6.54324	-0.00564	6.57091	6.56578	0.00513
0.854	6.81964	6.71972	6.72412	-0.00439	6.79976	6.79937	0.000387		0.854	6.60843	6.55342	6.54321	0.010212	6.55521	6.56575	-0.01053
0.855	6.80551	6.71415	6.72407	-0.00992	6.79663	6.79936	-0.00273		0.855	6.62207	6.53531	6.54318	-0.00787	6.56744	6.56571	0.001734
0.856	6.80191	6.72652	6.72402	0.002503	6.80229	6.79934	0.002951		0.856	6.60355	6.5464	6.54315	0.003247	6.55488	6.56568	-0.0108
0.857	6.82036	6.71909	6.72397	-0.00488	6.79653	6.79933	-0.0028		0.857	6.60912	6.53668	6.54313	-0.00645	6.56315	6.56564	-0.00249
0.858	6.82053	6.73266	6.72392	0.008742	6.79742	6.79932	-0.0019		0.858	6.60178	6.53731	6.5431	-0.00578	6.57295	6.56561	0.007342
0.859	6.81008	6.73779	6.72387	0.01392	6.78764	6.79931	-0.01166		0.859	6.60391	6.5472	6.54307	0.004128	6.55535	6.56557	-0.01022
0.86	6.80694	6.73668	6.72383	0.012852	6.80985	6.79929	0.010562		0.86	6.61495	6.53472	6.54304	-0.00833	6.56471	6.56554	-0.00083
0.861	6.82696	6.72627	6.72378	0.002495	6.78619	6.79928	-0.01309		0.861	6.62219	6.53134	6.54301	-0.01167	6.56219	6.5655	-0.00331
0.862	6.79836	6.72747	6.72373	0.003741	6.80177	6.79927	0.002502		0.862	6.60899	6.54211	6.54299	-0.00088	6.56448	6.56547	-0.00099
0.863	6.80902	6.73264	6.72368	0.00896	6.79256	6.79925	-0.0067		0.863	6.61151	6.53564	6.54296	-0.00732	6.56134	6.56543	-0.00409
0.864	6.80248	6.73094	6.72363	0.007306	6.80017	6.79924	0.000929		0.864	6.60284	6.54145	6.54293	-0.00148	6.57042	6.5654	0.005026
0.865	6.80692	6.72975	6.72359	0.006159	6.78033	6.79923	-0.0189		0.865	6.62228	6.53596	6.5429	-0.00694	6.55103	6.56536	-0.01433
0.866	6.81119	6.7258	6.72354	0.002263	6.80249	6.79921	0.003277		0.866	6.60799	6.5453	6.54288	0.002421	6.56832	6.56533	0.002996
0.867	6.82524	6.72809	6.72349	0.004597	6.80316	6.7992	0.003956		0.867	6.60968	6.55802	6.54285	0.015166	6.56045	6.56529	-0.00484
0.868	6.81189	6.72627	6.72344	0.002824	6.79548	6.79919	-0.0037		0.868	6.60367	6.54464	6.54282	0.001822	6.56125	6.56526	-0.00401
0.869	6.8129	6.72267	6.7234	-0.00072	6.79604	6.79918	-0.00313		0.869	6.61071	6.53543	6.54279	-0.00736	6.55479	6.56522	-0.01043
0.87	6.82324	6.73088	6.72335	0.007529	6.79729	6.79916	-0.00187		0.87	6.60595	6.53612	6.54277	-0.00664	6.56329	6.56519	-0.00189
0.871	6.81688	6.72744	6.7233	0.004141	6.79242	6.79915	-0.00673		0.871	6.61606	6.54519	6.54274	0.002455	6.57024	6.56515	0.005092
0.872	6.80213	6.72164	6.72325	-0.00162	6.8003	6.79914	0.001166		0.872	6.61462	6.55135	6.54271	0.008636	6.55768	6.56512	-0.00744
0.873	6.82102	6.73219	6.72321	0.008981	6.78615	6.79912	-0.01297		0.873	6.62122	6.53216	6.54268	-0.01053	6.56739	6.56508	0.002311
0.874	6.79569	6.72043	6.72316	-0.00273	6.79628	6.79911	-0.00283		0.874	6.62795	6.55173	6.54266	0.009072	6.57241	6.56505	0.007363
0.875	6.81303	6.7325	6.72311	0.009393	6.79431	6.7991	-0.00478		0.875	6.60832	6.53151	6.54263	-0.01112	6.56069	6.56501	-0.00433
0.876	6.81651	6.72516	6.72306	0.002093	6.79875	6.79909	-0.00034		0.876	6.60906	6.53839	6.5426	-0.00421	6.56285	6.56498	-0.00212
0.877	6.81792	6.72035	6.72302	-0.00267	6.7985	6.79907	-0.00057		0.877	6.5972	6.55189	6.54258	0.009317	6.55323	6.56494	-0.01171
0.878	6.81211	6.73051	6.72297	0.007537	6.79289	6.79906	-0.00617		0.878	6.61218	6.54567	6.54255	0.003116	6.56973	6.56491	0.004818
0.879	6.81824	6.71648	6.72292	-0.00644	6.80387	6.79905	0.004827		0.879	6.60731	6.54633	6.54252	0.003805	6.55585	6.56487	-0.00902
0.88	6.82571	6.72498	6.72288	0.002104	6.81203	6.79903	0.012998		0.88	6.60503	6.55416	6.5425	0.011667	6.56936	6.56484	0.004522
0.881	6.80973	6.71887	6.72283	-0.00396	6.80398	6.79902	0.004963		0.881	6.60861	6.52553	6.54247	-0.01694	6.55352	6.5648	-0.01128
0.882	6.80516	6.7328	6.72278	0.01002	6.79139	6.79901	-0.00762		0.882	6.61454	6.54889	6.54244	0.006444	6.56459	6.56477	-0.00018
0.883	6.81474	6.73297	6.72274	0.010228	6.80586	6.799	0.006862		0.883	6.61642	6.54092	6.54241	-0.0015	6.56522	6.56474	0.000486
0.884	6.80351	6.72415	6.72269	0.001462	6.80272	6.79898	0.003738		0.884	6.60511	6.53568	6.54239	-0.0067	6.56139	6.5647	-0.00331
0.885	6.8122	6.72139	6.72264	-0.00125	6.8107	6.79897	0.01173		0.885	6.6092	6.55322	6.54236	0.010856	6.56614	6.56467	0.001473
0.886	6.80598	6.72362	6.7226	0.001023	6.78848	6.79896	-0.01048		0.886	6.6114	6.54777	6.54233	0.005437	6.55558	6.56463	-0.00905
0.887	6.80585	6.72561	6.72255	0.003056	6.80373	6.79894	0.004788		0.887	6.59907	6.54391	6.54231	0.001599	6.56417	6.5646	-0.00042
0.888	6.81136	6.72204	6.72251	-0.00046	6.79802	6.79893	-0.00091		0.888	6.61428	6.54829	6.54228	0.006012	6.55599	6.56456	-0.00857
0.889	6.82587	6.72959	6.72246	0.007135	6.79696	6.79892	-0.00195		0.889	6.60918	6.5479	6.54225	0.005642	6.56891	6.56453	0.004378
0.89	6.81085	6.71792	6.72241	-0.00449	6.80114	6.79891	0.002232		0.89	6.6093	6.53336	6.54223	-0.00887	6.55486	6.56449	-0.00963
0.891	6.80645	6.73345	6.72237	0.011082	6.7959	6.79889	-0.00299		0.891	6.61291	6.5373	6.5422	-0.0049	6.5678	6.56446	0.003336
0.892	6.8185	6.7185	6.72232	-0.00382	6.80012	6.79888	0.001244		0.892	6.61031	6.54319	6.54218	0.001013	6.55784	6.56442	-0.00658
0.893	6.82227	6.7212	6.72228	-0.00107	6.79637	6.79887	-0.0025		0.893	6.61009	6.54804	6.54215	0.005887	6.5666	6.56439	0.002207
0.894	6.80711	6.72003	6.72223	-0.0022	6.80939	6.79885	0.010536		0.894	6.61339	6.54556	6.54212	0.003441	6.55745	6.56436	-0.0069
0.895	6.80542	6.71873	6.72219	-0.00345	6.78787	6.79884	-0.01097		0.895	6.60496	6.54543	6.5421	0.003333	6.56949	6.56432	0.005166
0.896	6.81439	6.72198	6.72214	-0.00016	6.79425	6.79883	-0.00458		0.896	6.60164	6.53938	6.54207	-0.00269	6.58112	6.56429	0.016837
0.897	6.80609	6.7281	6.72209	0.006001	6.79632	6.79882	-0.00249		0.897	6.60203	6.54967	6.54204	0.007622	6.55936	6.56425	-0.00489
0.898	6.81066	6.7245	6.72205	0.002452	6.80593	6.7988	0.007131		0.898	6.60669	6.54266	6.54202	0.000641	6.56272	6.56422	-0.0015
0.899	6.80731	6.73348	6.722	0.011472	6.79246	6.79879	-0.00633		0.899	6.59938	6.534	6.54199	-0.00799	6.56732	6.56418	0.003134
0.9	6.80685	6.73046	6.72196	0.008499	6.7901	6.79878	-0.00868		0.9	6.60979	6.54277	6.54197	0.000803	6.56656	6.56415	0.002413
0.901	6.81386	6.72325	6.72191	0.001339	6.79893	6.79876	0.000166		0.901	6.61187	6.54564	6.54194	0.003704	6.55877	6.56411	-0.00534
0.902	6.82158	6.72385	6.72187	0.001981	6.79267	6.79875	-0.00608		0.902	6.60782	6.55175	6.54191	0.00984	6.56496	6.56408	0.000876
0.903	6.80388	6.72932	6.72182	0.0075	6.80317	6.79874	0.004428		0.903	6.61202	6.5404	6.54189	-0.00148	6.57745	6.56405	0.013399
0.904	6.81074	6.72378	6.72178	0.002003	6.79802	6.79873	-0.0007		0.904	6.59467	6.53345	6.54186	-0.00841	6.56038	6.56401	-0.00363
0.905	6.82266	6.7353	6.72173	0.013563	6.80044	6.79871	0.001721		0.905	6.61593	6.53684	6.54184	-0.005	6.56715	6.56398	0.003177
0.906	6.82063	6.72857	6.72169	0.006881	6.79574	6.7987	-0.00296		0.906	6.61021	6.54663	6.54181	0.004823	6.56267	6.56394	-0.00127
0.907	6.81748	6.72589	6.72164	0.004245	6.79362	6.79869	-0.00507		0.907	6.60846	6.53126	6.54179	-0.01053	6.56743	6.56391	0.00352
0.908	6.81468	6.71691	6.7216	-0.00469	6.80081	6.79868	0.002132		0.908	6.60237	6.54119	6.54176	-0.00057	6.57053	6.56387	0.006654
0.909	6.82052	6.72576	6.72155	0.004205	6.79247	6.79866	-0.00619		0.909	6.60915	6.54466	6.54173	0.002923	6.58277	6.56384	0.018931
0.91	6.8184	6.72145	6.72151	-5.86e-05	6.79972	6.79865	0.001066		0.91	6.60311	6.54259	6.54171	0.000883	6.56404	6.56381	0.000233
0.911	6.81103	6.7228	6.72147	0.001334	6.80837	6.79864	0.009733		0.911	6.60426	6.54238	6.54168	0.000697	6.56519	6.56377	0.001419
0.912	6.80298	6.72953	6.72142	0.008105	6.80091	6.79862	0.002281		0.912	6.62325	6.5399	6.54166	-0.00176	6.55902	6.56374	-0.00472
0.913	6.80653	6.71948	6.72138	-0.0019	6.79594	6.79861	-0.00267		0.913	6.59778	6.54977	6.54163	0.008134	6.56306	6.5637	-0.00064
0.914	6.79374	6.72027	6.72133	-0.00106	6.79981	6.7986	0.001213		0.914	6.60424	6.55133	6.54161	0.009724	6.55578	6.56367	-0.00789
0.915	6.81209	6.72814	6.72129	0.006848	6.80265	6.79859	0.004068		0.915	6.61887	6.54794	6.54158	0.006357	6.55929	6.56364	-0.00435
0.916	6.81283	6.72831	6.72125	0.00706	6.80484	6.79857	0.006267		0.916	6.61273	6.54384	6.54156	0.002285	6.56771	6.5636	0.004107
0.917	6.81502	6.70728	6.7212	-0.01392	6.7935	6.79856	-0.00506		0.917	6.60773	6.54304	6.54153	0.001511	6.56149	6.56357	-0.00207
0.918	6.8116	6.71895	6.72116	-0.0022	6.80022	6.79855	0.001671		0.918	6.60763	6.5418	6.5415	0.000293	6.56003	6.56353	-0.00351
0.919	6.81899	6.71777	6.72111	-0.00334	6.81063	6.79854	0.01209		0.919	6.61572	6.54283	6.54148	0.001346	6.56116	6.5635	-0.00234
0.92	6.81415	6.72469	6.72107	0.003617	6.80413	6.79852	0.00561		0.92	6.61127	6.54713	6.54145	0.005679	6.57429	6.56346	0.010823
0.921	6.82732	6.72757	6.72103	0.006544	6.79436	6.79851	-0.00415		0.921	6.60749	6.55901	6.54143	0.017581	6.56713	6.56343	0.003696
0.922	6.81512	6.71969	6.72098	-0.00129	6.79197	6.7985	-0.00653		0.922	6.59565	6.53324	6.5414	-0.00816	6.56657	6.5634	0.00317
0.923	6.81635	6.71868	6.72094	-0.00226	6.8083	6.79848	0.009816		0.923	6.60875	6.54274	6.54138	0.001362	6.56456	6.56336	0.001197
0.924	6.81859	6.72555	6.7209	0.004654	6.80354	6.79847	0.005069		0.924	6.61052	6.54383	6.54135	0.002478	6.56368	6.56333	0.000349
0.925	6.80785	6.72036	6.72085	-0.00049	6.79725	6.79846	-0.00121		0.925	6.62137	6.53832	6.54133	-0.00301	6.55438	6.56329	-0.00892
0.926	6.8157	6.7178	6.72081	-0.00301	6.79916	6.79845	0.000709		0.926	6.60957	6.55225	6.5413	0.010944	6.56007	6.56326	-0.00319
0.927	6.81998	6.70893	6.72077	-0.01184	6.79233	6.79843	-0.00611		0.927	6.614	6.54554	6.54128	0.004259	6.56421	6.56323	0.000985
0.928	6.81367	6.73232	6.72072	0.011594	6.80018	6.79842	0.001757		0.928	6.59696	6.54548	6.54125	0.004223	6.56488	6.56319	0.001685
0.929	6.80846	6.71271	6.72068	-0.00797	6.80618	6.79841	0.007774		0.929	6.60341	6.55087	6.54123	0.009637	6.56759	6.56316	0.004433
0.93	6.81613	6.71602	6.72064	-0.00462	6.80121	6.7984	0.002817		0.93	6.60833	6.54432	6.54121	0.003114	6.56883	6.56312	0.0057
0.931	6.80992	6.70384	6.72059	-0.01676	6.80242	6.79838	0.004033		0.931	6.60587	6.54897	6.54118	0.007794	6.55698	6.56309	-0.00611
0.932	6.80854	6.72495	6.72055	0.004398	6.80496	6.79837	0.006584		0.932	6.60935	6.54054	6.54116	-0.00061	6.56727	6.56306	0.004209
0.933	6.8052	6.7197	6.72051	-0.0008	6.79291	6.79836	-0.00545		0.933	6.61491	6.53664	6.54113	-0.00449	6.56498	6.56302	0.001957
0.934	6.80913	6.71921	6.72046	-0.00125	6.78707	6.79835	-0.01128		0.934	6.62035	6.53963	6.54111	-0.00147	6.55821	6.56299	-0.00478
0.935	6.81083	6.71901	6.72042	-0.00142	6.79165	6.79833	-0.00668		0.935	6.6061	6.5411	6.54108	2.14e-05	6.56497	6.56296	0.002017
0.936	6.80975	6.72015	6.72038	-0.00023	6.79903	6.79832	0.000708		0.936	6.62437	6.54533	6.54106	0.004268	6.56258	6.56292	-0.00034
0.937	6.81261	6.71236	6.72034	-0.00797	6.7898	6.79831	-0.00851		0.937	6.61464	6.53182	6.54103	-0.00921	6.55797	6.56289	-0.00491
0.938	6.80849	6.72277	6.72029	0.002472	6.79753	6.7983	-0.00076		0.938	6.6124	6.53448	6.54101	-0.00653	6.572	6.56285	0.009146
0.939	6.81059	6.72384	6.72025	0.00359	6.79696	6.79828	-0.00132		0.939	6.61224	6.53537	6.54098	-0.00561	6.56874	6.56282	0.005919
0.94	6.8004	6.72837	6.72021	0.008165	6.80211	6.79827	0.003837		0.94	6.60593	6.53794	6.54096	-0.00302	6.55723	6.56279	-0.00556
0.941	6.8124	6.71145	6.72017	-0.00872	6.79184	6.79826	-0.00642		0.941	6.62053	6.53196	6.54094	-0.00898	6.56201	6.56275	-0.00074
0.942	6.81084	6.71714	6.72013	-0.00299	6.79617	6.79825	-0.00208		0.942	6.62391	6.55487	6.54091	0.013963	6.56715	6.56272	0.004431
0.943	6.81631	6.70903	6.72008	-0.01105	6.7962	6.79823	-0.00203		0.943	6.61716	6.53748	6.54089	-0.00341	6.5623	6.56268	-0.00039
0.944	6.80754	6.71959	6.72004	-0.00045	6.79628	6.79822	-0.00194		0.944	6.59804	6.54145	6.54086	0.000584	6.56102	6.56265	-0.00163
0.945	6.80231	6.72183	6.72	0.001834	6.80356	6.79821	0.005356		0.945	6.61587	6.53827	6.54084	-0.00257	6.57492	6.56262	0.012301
0.946	6.80908	6.71986	6.71996	-9.93e-05	6.80414	6.7982	0.005944		0.946	6.60878	6.54522	6.54081	0.004409	6.55279	6.56258	-0.00979
0.947	6.80549	6.71501	6.71992	-0.00491	6.79785	6.79818	-0.00033		0.947	6.6071	6.54178	6.54079	0.000992	6.56585	6.56255	0.003297
0.948	6.8238	6.71159	6.71987	-0.00828	6.79799	6.79817	-0.00018		0.948	6.61187	6.54082	6.54077	5.7e-05	6.57192	6.56252	0.009407
0.949	6.81687	6.71457	6.71983	-0.00526	6.79422	6.79816	-0.00393		0.949	6.61242	6.5353	6.54074	-0.00544	6.56752	6.56248	0.005038
0.95	6.80779	6.71942	6.71979	-0.00037	6.79785	6.79814	-0.0003		0.95	6.61151	6.53895	6.54072	-0.00176	6.55793	6.56245	-0.00452
0.951	6.8169	6.72114	6.71975	0.001395	6.78213	6.79813	-0.016		0.951	6.62258	6.54016	6.54069	-0.00054	6.55273	6.56242	-0.00968
0.952	6.8071	6.71118	6.71971	-0.00852	6.79172	6.79812	-0.0064		0.952	6.61137	6.53789	6.54067	-0.00278	6.56963	6.56238	0.007249
0.953	6.80761	6.72485	6.71967	0.00518	6.798	6.79811	-0.00011		0.953	6.60413	6.53747	6.54065	-0.00317	6.55583	6.56235	-0.00652
0.954	6.80395	6.72284	6.71962	0.003216	6.79881	6.79809	0.000711		0.954	6.60797	6.54441	6.54062	0.003786	6.55935	6.56231	-0.00296
0.955	6.81599	6.72426	6.71958	0.00468	6.802	6.79808	0.00392		0.955	6.61158	6.53036	6.5406	-0.01024	6.55387	6.56228	-0.00841
0.956	6.80145	6.7219	6.71954	0.002359	6.79703	6.79807	-0.00104		0.956	6.61506	6.52969	6.54058	-0.01089	6.55676	6.56225	-0.00549
0.957	6.81042	6.71741	6.7195	-0.00209	6.79934	6.79806	0.001288		0.957	6.61164	6.56037	6.54055	0.01982	6.56335	6.56221	0.001139
0.958	6.80983	6.7247	6.71946	0.005246	6.79997	6.79804	0.001926		0.958	6.60672	6.5422	6.54053	0.001669	6.56701	6.56218	0.004831
0.959	6.80316	6.72404	6.71942	0.004623	6.79837	6.79803	0.000338		0.959	6.6008	6.54133	6.5405	0.000822	6.56755	6.56215	0.005406
0.96	6.81181	6.7071	6.71938	-0.01228	6.79035	6.79802	-0.00767		0.96	6.61116	6.53549	6.54048	-0.00499	6.55718	6.56211	-0.00494
0.961	6.80462	6.72075	6.71934	0.001412	6.80384	6.79801	0.005837		0.961	6.61744	6.5518	6.54046	0.011345	6.56045	6.56208	-0.00163
0.962	6.80226	6.72061	6.7193	0.001315	6.79749	6.79799	-0.00051		0.962	6.60243	6.54765	6.54043	0.007218	6.56619	6.56205	0.004144
0.963	6.80858	6.72714	6.71925	0.007889	6.79299	6.79798	-0.00499		0.963	6.6104	6.53486	6.54041	-0.00555	6.56205	6.56201	3.98e-05
0.964	6.81214	6.71915	6.71921	-6.01e-05	6.79705	6.79797	-0.00092		0.964	6.61769	6.54115	6.54039	0.000761	6.56886	6.56198	0.006879
0.965	6.80921	6.72489	6.71917	0.00572	6.79628	6.79796	-0.00168		0.965	6.61448	6.54689	6.54036	0.006529	6.5733	6.56195	0.011355
0.966	6.81306	6.72285	6.71913	0.003718	6.79832	6.79794	0.000376		0.966	6.61526	6.54089	6.54034	0.000549	6.55829	6.56191	-0.00363
0.967	6.81103	6.72377	6.71909	0.004677	6.79304	6.79793	-0.00489		0.967	6.60683	6.54692	6.54032	0.006602	6.54933	6.56188	-0.01255
0.968	6.82358	6.71301	6.71905	-0.00604	6.79761	6.79792	-0.00031		0.968	6.61146	6.54444	6.54029	0.004143	6.57656	6.56185	0.014719
0.969	6.82703	6.71766	6.71901	-0.00135	6.79307	6.79791	-0.00484		0.969	6.61076	6.53873	6.54027	-0.00154	6.55228	6.56181	-0.00954
0.97	6.80859	6.71945	6.71897	0.00048	6.79459	6.7979	-0.0033		0.97	6.61277	6.54585	6.54025	0.005605	6.54929	6.56178	-0.01249
0.971	6.81166	6.70747	6.71893	-0.01146	6.79851	6.79788	0.000623		0.971	6.61371	6.54617	6.54022	0.005947	6.55704	6.56175	-0.00471
0.972	6.81228	6.7203	6.71889	0.001413	6.79005	6.79787	-0.00782		0.972	6.61559	6.54229	6.5402	0.002092	6.55845	6.56171	-0.00326
0.973	6.82096	6.71582	6.71885	-0.00303	6.80431	6.79786	0.006457		0.973	6.61138	6.54692	6.54018	0.006741	6.56099	6.56168	-0.00069
0.974	6.80971	6.71516	6.71881	-0.00365	6.79565	6.79785	-0.00219		0.974	6.60415	6.53355	6.54016	-0.0066	6.56096	6.56165	-0.00068
0.975	6.81548	6.72671	6.71877	0.007944	6.79738	6.79783	-0.00045		0.975	6.61333	6.53924	6.54013	-0.00089	6.5652	6.56161	0.003584
0.976	6.80532	6.71913	6.71873	0.000395	6.79563	6.79782	-0.00219		0.976	6.61103	6.54346	6.54011	0.003353	6.55232	6.56158	-0.00926
0.977	6.82153	6.70894	6.71869	-0.00975	6.79975	6.79781	0.001944		0.977	6.6089	6.53749	6.54009	-0.0026	6.55914	6.56155	-0.0024
0.978	6.82896	6.70915	6.71865	-0.0095	6.79752	6.7978	-0.00027		0.978	6.61561	6.54855	6.54006	0.008488	6.56972	6.56151	0.008205
0.979	6.8126	6.72937	6.71861	0.010764	6.80786	6.79778	0.010074		0.979	6.60644	6.54919	6.54004	0.009146	6.56146	6.56148	-1.62e-05
0.98	6.80489	6.72701	6.71857	0.008443	6.79703	6.79777	-0.00074		0.98	6.60313	6.54139	6.54002	0.001367	6.56436	6.56145	0.002911
0.981	6.8015	6.72231	6.71853	0.003783	6.80242	6.79776	0.004658		0.981	6.61652	6.52814	6.54	-0.01185	6.56226	6.56141	0.000843
0.982	6.80553	6.71786	6.71849	-0.00063	6.79249	6.79775	-0.00525		0.982	6.60621	6.55042	6.53997	0.010446	6.57057	6.56138	0.009188
0.983	6.79331	6.72172	6.71845	0.003265	6.79478	6.79773	-0.00296		0.983	6.60535	6.54585	6.53995	0.005901	6.5725	6.56135	0.011156
0.984	6.81883	6.71823	6.71841	-0.00018	6.78951	6.79772	-0.00822		0.984	6.61679	6.53776	6.53993	-0.00217	6.5633	6.56131	0.001983
0.985	6.81395	6.71615	6.71837	-0.00222	6.80113	6.79771	0.003417		0.985	6.61236	6.53817	6.53991	-0.00173	6.57144	6.56128	0.010157
0.986	6.81153	6.72098	6.71833	0.002648	6.79732	6.7977	-0.00037		0.986	6.61205	6.53994	6.53988	5.88e-05	6.55023	6.56125	-0.01102
0.987	6.81318	6.71293	6.71829	-0.00536	6.79697	6.79768	-0.00071		0.987	6.60655	6.5474	6.53986	0.007537	6.56129	6.56121	7.2e-05
0.988	6.8017	6.73282	6.71826	0.014567	6.79162	6.79767	-0.00605		0.988	6.61118	6.55011	6.53984	0.010268	6.55731	6.56118	-0.00387
0.989	6.80843	6.7183	6.71822	8.47e-05	6.79398	6.79766	-0.00368		0.989	6.60822	6.5414	6.53982	0.001584	6.55925	6.56115	-0.0019
0.99	6.81631	6.71603	6.71818	-0.00215	6.80275	6.79765	0.005101		0.99	6.61071	6.54546	6.53979	0.00567	6.57236	6.56111	0.011243
0.991	6.81177	6.72406	6.71814	0.005918	6.79018	6.79763	-0.00745		0.991	6.60874	6.54043	6.53977	0.000657	6.55603	6.56108	-0.00505
0.992	6.82603	6.71981	6.7181	0.001711	6.80176	6.79762	0.004141		0.992	6.61307	6.53991	6.53975	0.000166	6.55781	6.56105	-0.00324
0.993	6.80156	6.71724	6.71806	-0.00082	6.78947	6.79761	-0.00814		0.993	6.62049	6.53634	6.53973	-0.00339	6.56279	6.56102	0.00178
0.994	6.79765	6.70688	6.71802	-0.01114	6.80203	6.7976	0.004437		0.994	6.60565	6.53629	6.5397	-0.00341	6.56175	6.56098	0.000766
0.995	6.81506	6.72076	6.71798	0.00278	6.79251	6.79759	-0.00508		0.995	6.61028	6.55299	6.53968	0.013312	6.56031	6.56095	-0.00064
0.996	6.83301	6.71443	6.71794	-0.00351	6.79795	6.79757	0.00038		0.996	6.60578	6.5391	6.53966	-0.00056	6.5605	6.56092	-0.00041
0.997	6.82428	6.71584	6.71791	-0.00206	6.79914	6.79756	0.001578		0.997	6.59898	6.55219	6.53964	0.012557	6.56468	6.56088	0.003792
0.998	6.81092	6.71286	6.71787	-0.00501	6.79915	6.79755	0.001599		0.998	6.60405	6.55023	6.53961	0.010611	6.57121	6.56085	0.010355
0.999	6.83456	6.71522	6.71783	-0.00261	6.80123	6.79754	0.003699		0.999	6.60959	6.54048	6.53959	0.000884	6.54855	6.56082	-0.01227
1	6.80711	6.71649	6.71779	-0.0013	6.79821	6.79752	0.000687		1	6.60641	6.53953	6.53957	-4.4e-05	6.55957	6.56078	-0.00121
1.05	6.81189	6.7178	6.71594	0.001859	6.79721	6.79691	0.000296		1.05	6.60972	6.5417	6.53851	0.003185	6.55898	6.55915	-0.00017
1.1	6.81182	6.71498	6.71423	0.000747	6.79665	6.79631	0.00033		1.1	6.60899	6.53763	6.53753	0.0001	6.55867	6.55756	0.001115
1.15	6.81002	6.71528	6.71265	0.002636	6.79525	6.79573	-0.00047		1.15	6.61008	6.53875	6.53663	0.002124	6.55585	6.55599	-0.00014
1.2	6.81161	6.71381	6.71118	0.002633	6.79521	6.79515	5.78e-05		1.2	6.60875	6.53747	6.53578	0.001684	6.55314	6.55446	-0.00133
1.25	6.81231	6.71298	6.70981	0.00317	6.79428	6.79458	-0.0003		1.25	6.61046	6.5376	6.535	0.002596	6.55176	6.55296	-0.0012
1.3	6.80878	6.70828	6.70854	-0.00026	6.79401	6.79403	-1.65e-05		1.3	6.60947	6.53432	6.53427	5.16e-05	6.55034	6.5515	-0.00115
1.35	6.81057	6.70915	6.70736	0.001791	6.79338	6.79348	-0.0001		1.35	6.6107	6.53521	6.53358	0.001626	6.55012	6.55006	6.14e-05
1.4	6.81177	6.70823	6.70625	0.00198	6.79329	6.79294	0.000351		1.4	6.60937	6.53582	6.53294	0.002874	6.54808	6.54865	-0.00057
1.45	6.81051	6.70583	6.70521	0.000621	6.79091	6.79242	-0.0015		1.45	6.61133	6.53422	6.53234	0.00188	6.54725	6.54727	-2.12e-05
1.5	6.8114	6.70545	6.70424	0.001208	6.79198	6.7919	8.58e-05		1.5	6.61062	6.53443	6.53177	0.002665	6.54724	6.54592	0.001314
1.55	6.81086	6.7044	6.70333	0.001077	6.7894	6.79139	-0.002		1.55	6.61026	6.53214	6.53123	0.000907	6.54665	6.5446	0.002055
1.6	6.80941	6.70221	6.70247	-0.00025	6.78972	6.79089	-0.00117		1.6	6.60878	6.532	6.53072	0.001274	6.54384	6.5433	0.000538
1.65	6.80829	6.70257	6.70165	0.000921	6.7906	6.7904	0.000195		1.65	6.61022	6.53282	6.53024	0.00258	6.54226	6.54203	0.000225
1.7	6.81017	6.70139	6.70089	0.000502	6.79011	6.78992	0.000187		1.7	6.60978	6.53179	6.52978	0.002019	6.54027	6.54079	-0.00052
1.75	6.80839	6.70316	6.70016	0.002999	6.78826	6.78945	-0.00119		1.75	6.60915	6.53016	6.52933	0.000826	6.54058	6.53957	0.001011
1.8	6.81064	6.70071	6.69947	0.00124	6.78927	6.78899	0.000283		1.8	6.61033	6.53175	6.52891	0.002839	6.53858	6.53838	0.0002
1.85	6.80901	6.69994	6.69881	0.001126	6.7899	6.78853	0.001369		1.85	6.6096	6.53007	6.5285	0.001563	6.53615	6.53721	-0.00106
1.9	6.80906	6.69995	6.69819	0.001758	6.78741	6.78808	-0.00068		1.9	6.61148	6.52886	6.52811	0.000746	6.53679	6.53606	0.000724
1.95	6.81061	6.69823	6.69759	0.000639	6.78826	6.78765	0.000611		1.95	6.61047	6.52811	6.52774	0.000371	6.53454	6.53494	-0.0004
2	6.80868	6.69543	6.69702	-0.00159	6.78769	6.78721	0.000472		2	6.6102	6.52776	6.52737	0.000391	6.53353	6.53384	-0.00031
2.05	6.81115	6.69474	6.69647	-0.00173	6.7862	6.78679	-0.00059		2.05	6.61068	6.52651	6.52702	-0.00051	6.53329	6.53276	0.000529
2.1	6.81055	6.69528	6.69595	-0.00066	6.7848	6.78638	-0.00157		2.1	6.61072	6.52716	6.52667	0.000488	6.53155	6.53171	-0.00015
2.15	6.80941	6.69405	6.69544	-0.00139	6.78362	6.78597	-0.00235		2.15	6.61084	6.52615	6.52634	-0.00019	6.52693	6.53067	-0.00374
2.2	6.8106	6.69517	6.69496	0.000211	6.78419	6.78557	-0.00138		2.2	6.6109	6.52788	6.52602	0.001864	6.52577	6.52966	-0.00389
2.25	6.8079	6.69415	6.69449	-0.00033	6.78431	6.78517	-0.00086		2.25	6.61015	6.52616	6.5257	0.000467	6.52624	6.52867	-0.00243
2.3	6.80804	6.69275	6.69403	-0.00128	6.78605	6.78479	0.001264		2.3	6.61039	6.52636	6.52539	0.000969	6.52485	6.52769	-0.00284
2.35	6.80891	6.6922	6.69359	-0.0014	6.78367	6.78441	-0.00074		2.35	6.60963	6.52574	6.52508	0.000655	6.52689	6.52674	0.000155
2.4	6.81065	6.69105	6.69316	-0.00212	6.78401	6.78404	-3.01e-05		2.4	6.61072	6.52677	6.52478	0.001987	6.52525	6.5258	-0.00055
2.45	6.81173	6.69293	6.69275	0.000177	6.78256	6.78367	-0.00111		2.45	6.60995	6.52577	6.52449	0.00128	6.52505	6.52489	0.000169
2.5	6.81048	6.69176	6.69235	-0.00058	6.7833	6.78331	-1.72e-05		2.5	6.61001	6.52328	6.5242	-0.00092	6.52161	6.52399	-0.00238
2.55	6.80965	6.69091	6.69195	-0.00105	6.78271	6.78296	-0.00025		2.55	6.6106	6.52562	6.52392	0.001695	6.52263	6.52311	-0.00047
2.6	6.80803	6.69138	6.69157	-0.00019	6.7848	6.78261	0.002189		2.6	6.6106	6.52453	6.52364	0.000886	6.52205	6.52224	-0.00019
2.65	6.81121	6.69033	6.6912	-0.00087	6.7824	6.78228	0.000125		2.65	6.61051	6.52344	6.52337	7.58e-05	6.52129	6.5214	-0.0001
2.7	6.81031	6.69015	6.69083	-0.00069	6.78188	6.78194	-6.44e-05		2.7	6.60971	6.52358	6.5231	0.000489	6.52121	6.52057	0.000641
2.75	6.80961	6.6904	6.69048	-8.18e-05	6.78172	6.78161	0.000107		2.75	6.61109	6.5241	6.52283	0.001268	6.51983	6.51975	8e-05
2.8	6.81034	6.68942	6.69013	-0.00071	6.78202	6.78129	0.000725		2.8	6.61154	6.52249	6.52256	-7.45e-05	6.51842	6.51895	-0.00053
2.85	6.80816	6.68892	6.68979	-0.00087	6.7838	6.78098	0.002827		2.85	6.60966	6.5231	6.5223	0.000799	6.51667	6.51817	-0.0015
2.9	6.80856	6.68859	6.68945	-0.00086	6.78066	6.78067	-1.05e-05		2.9	6.61112	6.52349	6.52204	0.001449	6.51889	6.51741	0.001486
2.95	6.80934	6.68687	6.68912	-0.00226	6.78065	6.78036	0.000284		2.95	6.6113	6.52141	6.52179	-0.00038	6.51643	6.51665	-0.00023
3	6.81042	6.68707	6.6888	-0.00173	6.78034	6.78006	0.00028		3	6.611	6.52264	6.52153	0.001106	6.51318	6.51592	-0.00274
3.05	6.80901	6.68661	6.68848	-0.00187	6.78038	6.77977	0.000609		3.05	6.61059	6.52187	6.52128	0.000591	6.5141	6.51519	-0.0011
3.1	6.81002	6.68692	6.68817	-0.00125	6.77966	6.77948	0.000178		3.1	6.61175	6.52103	6.52103	1.44e-06	6.51597	6.51448	0.001485
3.15	6.81036	6.68661	6.68786	-0.00125	6.78055	6.7792	0.001347		3.15	6.61107	6.52057	6.52078	-0.00021	6.51285	6.51379	-0.00094
3.2	6.80867	6.68592	6.68756	-0.00164	6.78018	6.77892	0.001257		3.2	6.61174	6.52129	6.52054	0.000753	6.5144	6.51311	0.001296
3.25	6.81083	6.68528	6.68726	-0.00199	6.77963	6.77865	0.000985		3.25	6.61245	6.51969	6.52029	-0.0006	6.51201	6.51244	-0.00042
3.3	6.81128	6.68541	6.68697	-0.00156	6.77778	6.77838	-0.0006		3.3	6.60982	6.5203	6.52005	0.000251	6.51086	6.51178	-0.00092
3.35	6.81077	6.6854	6.68668	-0.00128	6.78018	6.77812	0.002057		3.35	6.61039	6.51977	6.51981	-3.85e-05	6.51138	6.51114	0.000241
3.4	6.80942	6.68302	6.6864	-0.00338	6.77871	6.77786	0.000848		3.4	6.60979	6.51979	6.51957	0.000215	6.5102	6.51051	-0.0003
3.45	6.80962	6.68508	6.68611	-0.00103	6.77746	6.77761	-0.00015		3.45	6.61073	6.51854	6.51933	-0.00079	6.50868	6.50989	-0.00121
3.5	6.80894	6.68313	6.68584	-0.00271	6.77899	6.77736	0.001631		3.5	6.60877	6.51659	6.5191	-0.00251	6.50934	6.50928	5.82e-05
3.55	6.8115	6.68484	6.68556	-0.00072	6.77759	6.77711	0.000473		3.55	6.6102	6.51942	6.51886	0.000558	6.50964	6.50868	0.000955
3.6	6.80877	6.68292	6.68529	-0.00237	6.77667	6.77687	-0.00021		3.6	6.61077	6.51757	6.51863	-0.00106	6.50667	6.5081	-0.00143
3.65	6.81108	6.68071	6.68503	-0.00431	6.77832	6.77664	0.001682		3.65	6.60949	6.51738	6.5184	-0.00102	6.50775	6.50752	0.000226
3.7	6.81148	6.68158	6.68476	-0.00318	6.77773	6.77641	0.001326		3.7	6.60983	6.51839	6.51817	0.000225	6.50695	6.50696	-9.54e-06
3.75	6.81037	6.68117	6.6845	-0.00333	6.7753	6.77618	-0.00088		3.75	6.60938	6.51734	6.51794	-0.0006	6.50699	6.50641	0.000579
3.8	6.81103	6.68094	6.68424	-0.0033	6.77525	6.77596	-0.00071		3.8	6.60904	6.51889	6.51771	0.00118	6.50573	6.50587	-0.00014
3.85	6.81085	6.68037	6.68399	-0.00362	6.77551	6.77574	-0.00023		3.85	6.60978	6.51825	6.51749	0.000764	6.50496	6.50533	-0.00038
3.9	6.81012	6.67929	6.68374	-0.00445	6.7757	6.77552	0.000175		3.9	6.61056	6.51794	6.51726	0.000677	6.50397	6.50481	-0.00084
3.95	6.81113	6.67837	6.68349	-0.00512	6.77442	6.77531	-0.0009		3.95	6.60962	6.51723	6.51704	0.000189	6.50247	6.5043	-0.00183
4	6.81318	6.68075	6.68324	-0.00249	6.77585	6.7751	0.000743		4	6.60919	6.51628	6.51682	-0.00054	6.50428	6.50379	0.000483
4.05	6.81072	6.67854	6.683	-0.00446	6.77658	6.7749	0.001675		4.05	6.60865	6.51703	6.5166	0.000438	6.50272	6.5033	-0.00058
4.1	6.80992	6.67849	6.68276	-0.00427	6.77524	6.7747	0.000541		4.1	6.61044	6.51495	6.51637	-0.00143	6.50338	6.50281	0.000565
4.15	6.80983	6.67988	6.68252	-0.00264	6.77577	6.7745	0.001263		4.15	6.60926	6.51496	6.51616	-0.0012	6.50268	6.50234	0.000339
4.2	6.81081	6.67935	6.68229	-0.00294	6.77483	6.77431	0.000518		4.2	6.61051	6.51368	6.51594	-0.00225	6.50197	6.50187	0.000104
4.25	6.81047	6.67958	6.68206	-0.00248	6.77434	6.77412	0.000214		4.25	6.60926	6.51555	6.51572	-0.00017	6.50187	6.50141	0.000456
4.3	6.80836	6.67982	6.68182	-0.002	6.77332	6.77394	-0.00062		4.3	6.61055	6.51545	6.51551	-5.71e-05	6.50088	6.50096	-7.83e-05
4.35	6.80911	6.67723	6.6816	-0.00436	6.77319	6.77376	-0.00056		4.35	6.61062	6.51586	6.51529	0.000568	6.49996	6.50052	-0.00056
4.4	6.81111	6.67903	6.68137	-0.00234	6.77471	6.77358	0.001131		4.4	6.60937	6.51314	6.51508	-0.00194	6.50056	6.50008	0.000478
4.45	6.81204	6.67769	6.68115	-0.00346	6.77404	6.7734	0.000642		4.45	6.61023	6.51561	6.51486	0.000743	6.49959	6.49966	-6.39e-05
4.5	6.80996	6.67742	6.68093	-0.00351	6.77418	6.77323	0.000956		4.5	6.61102	6.51415	6.51465	-0.0005	6.50133	6.49924	0.002092
4.55	6.80963	6.67807	6.68071	-0.00263	6.77376	6.77306	0.000707		4.55	6.60984	6.51323	6.51444	-0.00121	6.4979	6.49883	-0.00092
4.6	6.8098	6.67765	6.68049	-0.00284	6.77262	6.77289	-0.00027		4.6	6.6105	6.51282	6.51423	-0.00142	6.49907	6.49842	0.000654
4.65	6.80911	6.67788	6.68028	-0.00239	6.77391	6.77273	0.001187		4.65	6.61146	6.51246	6.51402	-0.00156	6.49655	6.49802	-0.00147
4.7	6.80949	6.67734	6.68007	-0.00273	6.77553	6.77257	0.002966		4.7	6.61023	6.51218	6.51382	-0.00164	6.49574	6.49763	-0.00189
4.75	6.80865	6.6774	6.67986	-0.00246	6.77207	6.77241	-0.00034		4.75	6.61204	6.51346	6.51361	-0.00015	6.49731	6.49725	6.39e-05
4.8	6.8103	6.67796	6.67965	-0.00169	6.77062	6.77226	-0.00163		4.8	6.61166	6.51246	6.5134	-0.00095	6.4963	6.49687	-0.00057
4.85	6.8107	6.67593	6.67944	-0.00352	6.77118	6.7721	-0.00092		4.85	6.61068	6.51263	6.5132	-0.00057	6.49493	6.4965	-0.00157
4.9	6.80932	6.67695	6.67924	-0.00229	6.77287	6.77195	0.000917		4.9	6.6111	6.51422	6.513	0.001219	6.49666	6.49614	0.000517
4.95	6.80986	6.67783	6.67904	-0.00121	6.77279	6.77181	0.000986		4.95	6.61096	6.51265	6.51279	-0.00014	6.49705	6.49578	0.001272
5	6.81024	6.67689	6.67884	-0.00194	6.77154	6.77166	-0.00012		5	6.61207	6.51213	6.51259	-0.00046	6.49399	6.49543	-0.00144
5.05	6.80894	6.67431	6.67864	-0.00433	6.77089	6.77152	-0.00064		5.05	6.61039	6.51162	6.51239	-0.00077	6.49472	6.49509	-0.00037
5.1	6.8091	6.67559	6.67845	-0.00285	6.77159	6.77138	0.000202		5.1	6.61165	6.51143	6.51219	-0.00076	6.49599	6.49475	0.001246
5.15	6.80913	6.67563	6.67825	-0.00262	6.77224	6.77125	0.000988		5.15	6.61182	6.51077	6.51199	-0.00122	6.49478	6.49441	0.000369
5.2	6.81037	6.67533	6.67806	-0.00273	6.7737	6.77111	0.002589		5.2	6.61224	6.51094	6.51179	-0.00086	6.49383	6.49409	-0.00026
5.25	6.80725	6.67606	6.67787	-0.00181	6.77161	6.77098	0.000624		5.25	6.60971	6.51157	6.5116	-2.31e-05	6.49339	6.49376	-0.00037
5.3	6.80986	6.67643	6.67768	-0.00125	6.77265	6.77086	0.001791		5.3	6.6124	6.50943	6.5114	-0.00197	6.49403	6.49345	0.000587
5.35	6.8067	6.67726	6.6775	-0.00024	6.77156	6.77073	0.000834		5.35	6.61088	6.51063	6.51121	-0.00058	6.49397	6.49314	0.000834
5.4	6.80999	6.67656	6.67731	-0.00075	6.77139	6.7706	0.00079		5.4	6.61057	6.50982	6.51101	-0.00119	6.49308	6.49283	0.000247
5.45	6.80868	6.67503	6.67713	-0.0021	6.7705	6.77048	1.86e-05		5.45	6.60984	6.51163	6.51082	0.000806	6.49304	6.49253	0.000507
5.5	6.80788	6.67635	6.67695	-0.0006	6.77321	6.77036	0.002848		5.5	6.60964	6.50983	6.51063	-0.0008	6.49377	6.49223	0.001532
5.55	6.80751	6.67671	6.67677	-6.42e-05	6.77215	6.77025	0.001903		5.55	6.60994	6.50882	6.51043	-0.00162	6.49302	6.49194	0.001072
5.6	6.80889	6.67716	6.67659	0.000568	6.769	6.77013	-0.00113		5.6	6.6102	6.50974	6.51024	-0.0005	6.49221	6.49166	0.00055
5.65	6.80737	6.67519	6.67642	-0.00123	6.77031	6.77002	0.000295		5.65	6.6082	6.5099	6.51005	-0.00015	6.4911	6.49138	-0.00027
5.7	6.80671	6.67525	6.67624	-0.00099	6.77057	6.76991	0.00066		5.7	6.61157	6.5087	6.50987	-0.00117	6.4908	6.4911	-0.0003
5.75	6.80812	6.67605	6.67607	-2.53e-05	6.77177	6.7698	0.001973		5.75	6.61117	6.5069	6.50968	-0.00278	6.49221	6.49083	0.001386
5.8	6.80892	6.67452	6.6759	-0.00138	6.76899	6.76969	-0.0007		5.8	6.61026	6.50961	6.50949	0.00012	6.49284	6.49056	0.002277
5.85	6.80796	6.67609	6.67573	0.000358	6.77037	6.76958	0.000787		5.85	6.60974	6.50702	6.5093	-0.00228	6.49242	6.4903	0.002118
5.9	6.80742	6.67556	6.67556	-6.32e-06	6.77154	6.76948	0.002059		5.9	6.61032	6.50731	6.50912	-0.00181	6.49116	6.49004	0.001126
5.95	6.80726	6.67551	6.6754	0.000113	6.76981	6.76938	0.000433		5.95	6.60947	6.50666	6.50893	-0.00228	6.4904	6.48978	0.000617
6	6.80715	6.67573	6.67524	0.00049	6.76911	6.76928	-0.00017		6	6.60957	6.50702	6.50875	-0.00173	6.49041	6.48953	0.00088
6.05	6.80712	6.67368	6.67507	-0.0014	6.77132	6.76918	0.002135		6.05	6.60829	6.50614	6.50857	-0.00243	6.49017	6.48929	0.000883
6.1	6.81121	6.67399	6.67491	-0.00093	6.77099	6.76908	0.00191		6.1	6.60942	6.5051	6.50839	-0.00328	6.49129	6.48904	0.002249
6.15	6.80701	6.67377	6.67475	-0.00098	6.77049	6.76899	0.001498		6.15	6.61078	6.50591	6.50821	-0.00229	6.49097	6.4888	0.002164
6.2	6.80941	6.67454	6.6746	-5.64e-05	6.76871	6.7689	-0.00018		6.2	6.61121	6.50549	6.50803	-0.00253	6.48917	6.48857	0.000598
6.25	6.80866	6.67521	6.67444	0.000773	6.76998	6.76881	0.001176		6.25	6.6088	6.50695	6.50785	-0.00089	6.49077	6.48834	0.002434
6.3	6.80892	6.67482	6.67429	0.000539	6.77062	6.76872	0.0019		6.3	6.60874	6.5047	6.50767	-0.00297	6.48998	6.48811	0.001868
6.35	6.80903	6.6723	6.67413	-0.00184	6.77066	6.76863	0.002032		6.35	6.6077	6.50648	6.50749	-0.00101	6.48977	6.48789	0.001879
6.4	6.80692	6.67419	6.67398	0.000209	6.77063	6.76854	0.002091		6.4	6.60887	6.5055	6.50731	-0.00182	6.49025	6.48767	0.002584
6.45	6.80792	6.6741	6.67383	0.000273	6.7695	6.76846	0.001038		6.45	6.6094	6.50509	6.50714	-0.00205	6.48944	6.48745	0.001989
6.5	6.81105	6.67221	6.67368	-0.00147	6.76942	6.76838	0.00104		6.5	6.60868	6.50433	6.50696	-0.00263	6.48844	6.48723	0.001207
6.55	6.8072	6.67122	6.67354	-0.00232	6.76936	6.76829	0.001065		6.55	6.60943	6.50518	6.50679	-0.00161	6.48876	6.48702	0.001735
6.6	6.80799	6.67153	6.67339	-0.00186	6.77015	6.76821	0.00194		6.6	6.60897	6.5049	6.50661	-0.00171	6.48821	6.48682	0.001391
6.65	6.80825	6.6715	6.67325	-0.00174	6.76954	6.76814	0.001403		6.65	6.60804	6.50458	6.50644	-0.00186	6.48633	6.48661	-0.00028
6.7	6.80778	6.67291	6.6731	-0.0002	6.76892	6.76806	0.000861		6.7	6.60883	6.50415	6.50627	-0.00212	6.48746	6.48641	0.001049
6.75	6.80797	6.67151	6.67296	-0.00145	6.76886	6.76798	0.000881		6.75	6.60893	6.50511	6.5061	-0.00099	6.48673	6.48621	0.000517
6.8	6.80809	6.67211	6.67282	-0.00072	6.76863	6.76791	0.000719		6.8	6.60931	6.50685	6.50593	0.000926	6.48518	6.48602	-0.00084
6.85	6.80886	6.67274	6.67268	5.76e-05	6.76965	6.76783	0.001811		6.85	6.60862	6.5036	6.50576	-0.00216	6.48679	6.48583	0.000965
6.9	6.81144	6.67284	6.67254	0.00029	6.77002	6.76776	0.002259		6.9	6.60944	6.5055	6.50559	-8.77e-05	6.48657	6.48564	0.000928
6.95	6.8094	6.67132	6.67241	-0.00109	6.76831	6.76769	0.000616		6.95	6.60786	6.5066	6.50542	0.001181	6.4876	6.48545	0.002145
7	6.80999	6.67084	6.67227	-0.00144	6.7698	6.76762	0.002181		7	6.60887	6.50437	6.50525	-0.00089	6.48604	6.48527	0.000769
7.05	6.81048	6.67202	6.67214	-0.00012	6.76892	6.76756	0.001361		7.05	6.60941	6.50389	6.50509	-0.0012	6.48685	6.48509	0.001762
7.1	6.80939	6.67187	6.67201	-0.00014	6.77036	6.76749	0.00287		7.1	6.61048	6.5045	6.50492	-0.00042	6.48637	6.48491	0.001461
7.15	6.81122	6.67054	6.67188	-0.00134	6.76848	6.76742	0.001058		7.15	6.60824	6.50397	6.50476	-0.00079	6.48615	6.48473	0.001415
7.2	6.80834	6.67184	6.67175	9.64e-05	6.76995	6.76736	0.002589		7.2	6.60885	6.50466	6.50459	6.38e-05	6.48618	6.48456	0.001617
7.25	6.80945	6.66983	6.67162	-0.00179	6.76934	6.7673	0.002049		7.25	6.60891	6.50236	6.50443	-0.00207	6.48658	6.48439	0.002192
7.3	6.81062	6.66987	6.67149	-0.00162	6.76814	6.76723	0.00091		7.3	6.60841	6.50377	6.50427	-0.0005	6.48504	6.48422	0.000818
7.35	6.81073	6.66809	6.67137	-0.00327	6.76852	6.76717	0.001346		7.35	6.6091	6.50269	6.50411	-0.00142	6.48418	6.48406	0.000122
7.4	6.80872	6.67047	6.67124	-0.00077	6.76855	6.76711	0.00144		7.4	6.60931	6.50178	6.50394	-0.00217	6.48419	6.48389	0.000298
7.45	6.80915	6.67022	6.67112	-0.0009	6.76785	6.76705	0.000791		7.45	6.6084	6.50357	6.50378	-0.00022	6.48436	6.48373	0.000624
7.5	6.80956	6.67061	6.671	-0.00039	6.7686	6.767	0.001604		7.5	6.60969	6.50101	6.50362	-0.00261	6.48279	6.48358	-0.00079
7.55	6.80866	6.66854	6.67087	-0.00234	6.76894	6.76694	0.002002		7.55	6.60857	6.50178	6.50347	-0.00168	6.48236	6.48342	-0.00106
7.6	6.80918	6.66852	6.67076	-0.00223	6.76801	6.76688	0.001128		7.6	6.6078	6.50194	6.50331	-0.00137	6.48252	6.48327	-0.00075
7.65	6.80719	6.6686	6.67064	-0.00204	6.76719	6.76683	0.000364		7.65	6.60895	6.50234	6.50315	-0.00081	6.48264	6.48311	-0.00047
7.7	6.80846	6.668	6.67052	-0.00252	6.76706	6.76678	0.000287		7.7	6.60866	6.50181	6.50299	-0.00118	6.4832	6.48296	0.000234
7.75	6.80769	6.66802	6.6704	-0.00238	6.76668	6.76672	-4.14e-05		7.75	6.60762	6.50038	6.50284	-0.00245	6.48252	6.48282	-0.00029
7.8	6.8079	6.66862	6.67029	-0.00167	6.76763	6.76667	0.000961		7.8	6.60945	6.50204	6.50268	-0.00064	6.48172	6.48267	-0.00095
7.85	6.80593	6.66965	6.67017	-0.00052	6.76716	6.76662	0.000537		7.85	6.6078	6.50273	6.50253	0.000198	6.48284	6.48253	0.000311
7.9	6.80979	6.6684	6.67006	-0.00166	6.76714	6.76657	0.000568		7.9	6.60797	6.5013	6.50237	-0.00107	6.48333	6.48239	0.000942
7.95	6.80855	6.66965	6.66995	-0.00029	6.76667	6.76652	0.00015		7.95	6.60921	6.5029	6.50222	0.000682	6.48037	6.48225	-0.00188
8	6.8071	6.66945	6.66984	-0.00038	6.76959	6.76648	0.003116		8	6.60859	6.50091	6.50207	-0.00116	6.48192	6.48211	-0.00018
8.05	6.80932	6.669	6.66973	-0.00073	6.76698	6.76643	0.000553		8.05	6.60946	6.50107	6.50192	-0.00085	6.48229	6.48197	0.000323
8.1	6.80828	6.66867	6.66962	-0.00094	6.76784	6.76638	0.001463		8.1	6.60834	6.49831	6.50177	-0.00346	6.48094	6.48184	-0.0009
8.15	6.8063	6.67141	6.66951	0.0019	6.76704	6.76634	0.000701		8.15	6.60842	6.50171	6.50162	8.97e-05	6.48182	6.48171	0.000119
8.2	6.80944	6.66828	6.6694	-0.00112	6.76905	6.76629	0.002754		8.2	6.61126	6.50186	6.50147	0.000393	6.48198	6.48157	0.000401
8.25	6.80818	6.66957	6.6693	0.000268	6.76675	6.76625	0.000505		8.25	6.60936	6.50073	6.50132	-0.00059	6.47861	6.48145	-0.00284
8.3	6.8089	6.66947	6.66919	0.000274	6.76572	6.76621	-0.00049		8.3	6.60965	6.4998	6.50117	-0.00137	6.48147	6.48132	0.000153
8.35	6.80853	6.67084	6.66909	0.001746	6.76626	6.76616	9.94e-05		8.35	6.61117	6.50048	6.50102	-0.00054	6.48044	6.48119	-0.00075
8.4	6.80827	6.67072	6.66899	0.001737	6.76673	6.76612	0.000607		8.4	6.61168	6.49948	6.50088	-0.0014	6.48056	6.48107	-0.00051
8.45	6.80906	6.67113	6.66889	0.002243	6.76416	6.76608	-0.00192		8.45	6.61131	6.50061	6.50073	-0.00012	6.47912	6.48095	-0.00183
8.5	6.80958	6.6679	6.66879	-0.00088	6.76585	6.76604	-0.00019		8.5	6.61032	6.49856	6.50058	-0.00203	6.48093	6.48083	0.000107
8.55	6.80967	6.66879	6.66869	9.95e-05	6.76642	6.766	0.000421		8.55	6.61205	6.499	6.50044	-0.00144	6.47937	6.48071	-0.00134
8.6	6.8093	6.66898	6.66859	0.000395	6.76734	6.76596	0.001373		8.6	6.6099	6.49906	6.5003	-0.00123	6.48036	6.48059	-0.00023
8.65	6.81067	6.66994	6.66849	0.001451	6.76634	6.76593	0.000416		8.65	6.61007	6.49805	6.50015	-0.00211	6.48014	6.48048	-0.00033
8.7	6.80723	6.67052	6.66839	0.002131	6.76583	6.76589	-5.34e-05		8.7	6.61122	6.49887	6.50001	-0.00114	6.47959	6.48036	-0.00077
8.75	6.8085	6.66762	6.6683	-0.00067	6.76722	6.76585	0.001372		8.75	6.60998	6.49936	6.49987	-0.00051	6.48013	6.48025	-0.00012
8.8	6.80638	6.66869	6.6682	0.000492	6.76694	6.76582	0.001124		8.8	6.60904	6.49668	6.49973	-0.00305	6.47947	6.48014	-0.00067
8.85	6.80805	6.66999	6.66811	0.00188	6.76755	6.76578	0.001771		8.85	6.61148	6.49778	6.49959	-0.00181	6.47972	6.48003	-0.00031
8.9	6.80795	6.6682	6.66801	0.000184	6.76699	6.76575	0.001246		8.9	6.61054	6.49732	6.49945	-0.00212	6.47911	6.47992	-0.00081
8.95	6.80807	6.66965	6.66792	0.001728	6.76439	6.76571	-0.00133		8.95	6.61033	6.49739	6.49931	-0.00192	6.47835	6.47981	-0.00146
9	6.80772	6.6688	6.66783	0.000965	6.76524	6.76568	-0.00044		9	6.61048	6.49689	6.49917	-0.00228	6.48004	6.4797	0.000337
9.05	6.80711	6.66851	6.66774	0.000768	6.76653	6.76565	0.000882		9.05	6.61099	6.49687	6.49903	-0.00216	6.47789	6.4796	-0.00171
9.1	6.8083	6.6702	6.66765	0.002551	6.76657	6.76561	0.000954		9.1	6.61016	6.49602	6.49889	-0.00287	6.48049	6.4795	0.000991
9.15	6.80771	6.67017	6.66756	0.002611	6.76787	6.76558	0.002287		9.15	6.60971	6.49846	6.49876	-0.0003	6.48028	6.47939	0.000888
9.2	6.80772	6.66916	6.66747	0.001686	6.76378	6.76555	-0.00177		9.2	6.60935	6.49543	6.49862	-0.00319	6.4809	6.47929	0.001606
9.25	6.80869	6.66778	6.66739	0.000395	6.76587	6.76552	0.000351		9.25	6.61017	6.49946	6.49848	0.000978	6.47842	6.47919	-0.00078
9.3	6.80767	6.66792	6.6673	0.000617	6.76541	6.76549	-8.14e-05		9.3	6.60921	6.49677	6.49835	-0.00158	6.47809	6.4791	-0.001
9.35	6.80739	6.67008	6.66722	0.002866	6.76533	6.76546	-0.00013		9.35	6.60883	6.49673	6.49822	-0.00148	6.48013	6.479	0.001127
9.4	6.80795	6.66776	6.66713	0.000627	6.76455	6.76543	-0.00088		9.4	6.60969	6.49772	6.49808	-0.00036	6.48023	6.4789	0.001327
9.45	6.80784	6.66816	6.66705	0.001108	6.76498	6.76541	-0.00043		9.45	6.60875	6.49694	6.49795	-0.00101	6.47836	6.47881	-0.00045
9.5	6.80988	6.66751	6.66697	0.00054	6.76631	6.76538	0.000927		9.5	6.60841	6.497	6.49782	-0.00081	6.47825	6.47871	-0.00046
9.55	6.80657	6.66746	6.66688	0.000571	6.7659	6.76535	0.000552		9.55	6.60805	6.49851	6.49768	0.000829	6.47676	6.47862	-0.00186
9.6	6.80799	6.66657	6.6668	-0.00023	6.76443	6.76532	-0.0009		9.6	6.60753	6.49741	6.49755	-0.00014	6.47807	6.47853	-0.00046
9.65	6.80652	6.66755	6.66672	0.000826	6.76534	6.7653	3.96e-05		9.65	6.60801	6.49754	6.49742	0.00012	6.47901	6.47844	0.000576
9.7	6.80796	6.66736	6.66664	0.000714	6.76306	6.76527	-0.00221		9.7	6.6106	6.49602	6.49729	-0.00127	6.47855	6.47835	0.0002
9.75	6.81038	6.66623	6.66656	-0.00033	6.76554	6.76525	0.000297		9.75	6.60998	6.49618	6.49716	-0.00098	6.47913	6.47826	0.000871
9.8	6.80771	6.66707	6.66649	0.000588	6.76639	6.76522	0.001171		9.8	6.6073	6.49593	6.49703	-0.0011	6.47711	6.47817	-0.00107
9.85	6.80593	6.66614	6.66641	-0.00026	6.76585	6.7652	0.000651		9.85	6.60902	6.49401	6.49691	-0.0029	6.47919	6.47809	0.001098
9.9	6.80535	6.6659	6.66633	-0.00043	6.76697	6.76517	0.001796		9.9	6.60826	6.4965	6.49678	-0.00028	6.47572	6.478	-0.00228
9.95	6.80708	6.66671	6.66626	0.000453	6.76816	6.76515	0.00301		9.95	6.60921	6.49696	6.49665	0.000311	6.47592	6.47792	-0.002
10	6.80788	6.66645	6.66618	0.000265	6.76714	6.76513	0.00201		10	6.60817	6.49677	6.49653	0.00024	6.47723	6.47783	-0.0006
10.05	6.80617	6.6657	6.66611	-0.00041	6.76531	6.7651	0.000205		10.05	6.60918	6.49477	6.4964	-0.00163	6.47759	6.47775	-0.00016
10.1	6.808	6.66567	6.66603	-0.00036	6.76603	6.76508	0.000944		10.1	6.6097	6.4964	6.49627	0.000129	6.47644	6.47767	-0.00123
10.15	6.80763	6.66648	6.66596	0.000515	6.76593	6.76506	0.000866		10.15	6.60916	6.49631	6.49615	0.000164	6.47659	6.47759	-0.001
10.2	6.80738	6.66613	6.66589	0.000237	6.76557	6.76504	0.00053		10.2	6.60845	6.49567	6.49603	-0.00036	6.478	6.47751	0.000487
10.25	6.80618	6.66504	6.66582	-0.00078	6.76764	6.76502	0.002624		10.25	6.60998	6.49527	6.4959	-0.00063	6.47811	6.47743	0.000682
10.3	6.8086	6.66749	6.66575	0.00174	6.76716	6.765	0.002165		10.3	6.6088	6.49534	6.49578	-0.00044	6.4763	6.47735	-0.00105
10.35	6.80753	6.66405	6.66568	-0.00162	6.76467	6.76498	-0.0003		10.35	6.60819	6.49685	6.49566	0.001192	6.47743	6.47728	0.000158
10.4	6.80736	6.66702	6.66561	0.001412	6.76618	6.76496	0.001225		10.4	6.61013	6.49568	6.49554	0.000146	6.47611	6.4772	-0.00109
10.45	6.80709	6.66769	6.66554	0.002153	6.76619	6.76494	0.001255		10.45	6.60878	6.4949	6.49541	-0.00051	6.47659	6.47712	-0.00053
10.5	6.80803	6.66656	6.66547	0.001087	6.76512	6.76492	0.000198		10.5	6.61011	6.49439	6.49529	-0.0009	6.47697	6.47705	-7.57e-05
10.55	6.80882	6.66417	6.6654	-0.00123	6.76698	6.7649	0.002079		10.55	6.61026	6.49404	6.49517	-0.00113	6.47562	6.47698	-0.00135
10.6	6.80753	6.66542	6.66533	8.47e-05	6.76526	6.76488	0.000384		10.6	6.60848	6.49456	6.49505	-0.0005	6.47798	6.4769	0.00108
10.65	6.80762	6.66517	6.66527	-9.71e-05	6.76519	6.76486	0.000329		10.65	6.60815	6.49352	6.49494	-0.00142	6.4763	6.47683	-0.00053
10.7	6.80639	6.66344	6.6652	-0.00176	6.76456	6.76484	-0.00028		10.7	6.60953	6.49373	6.49482	-0.00109	6.47617	6.47676	-0.00059
10.75	6.80858	6.66395	6.66514	-0.00119	6.76455	6.76483	-0.00028		10.75	6.60886	6.49333	6.4947	-0.00137	6.47499	6.47669	-0.0017
10.8	6.80909	6.66361	6.66507	-0.00146	6.76525	6.76481	0.000443		10.8	6.60778	6.49209	6.49458	-0.00249	6.47755	6.47662	0.000933
10.85	6.80886	6.66394	6.66501	-0.00107	6.76443	6.76479	-0.00036		10.85	6.6083	6.49242	6.49447	-0.00204	6.4766	6.47655	4.97e-05
10.9	6.81038	6.66607	6.66495	0.001119	6.76525	6.76478	0.000469		10.9	6.60842	6.49178	6.49435	-0.00257	6.47803	6.47648	0.001552
10.95	6.80751	6.66558	6.66488	0.000697	6.76456	6.76476	-0.0002		10.95	6.60772	6.49239	6.49423	-0.00184	6.47677	6.47641	0.000355
11	6.80783	6.66396	6.66482	-0.00087	6.76335	6.76474	-0.0014		11	6.60879	6.49138	6.49412	-0.00274	6.4748	6.47635	-0.00155
11.05	6.80685	6.66462	6.66476	-0.00014	6.76573	6.76473	0.000999		11.05	6.6083	6.49194	6.494	-0.00206	6.47536	6.47628	-0.00092
11.1	6.80626	6.66673	6.6647	0.002033	6.76421	6.76471	-0.0005		11.1	6.60863	6.49275	6.49389	-0.00114	6.47563	6.47622	-0.00059
11.15	6.80743	6.66415	6.66464	-0.0005	6.76428	6.7647	-0.00042		11.15	6.60802	6.49272	6.49378	-0.00106	6.47759	6.47615	0.001439
11.2	6.80773	6.66525	6.66458	0.000666	6.76608	6.76468	0.001396		11.2	6.60824	6.49388	6.49366	0.000213	6.47592	6.47609	-0.00017
11.25	6.80682	6.66484	6.66452	0.000322	6.76547	6.76467	0.000804		11.25	6.60935	6.49083	6.49355	-0.00272	6.47421	6.47602	-0.00181
11.3	6.80828	6.66308	6.66446	-0.00139	6.76498	6.76465	0.000328		11.3	6.6084	6.49394	6.49344	0.000499	6.47551	6.47596	-0.00045
11.35	6.80703	6.66375	6.66441	-0.00066	6.76685	6.76464	0.002212		11.35	6.60764	6.49328	6.49333	-5.29e-05	6.47524	6.4759	-0.00066
11.4	6.80703	6.66539	6.66435	0.00104	6.76495	6.76463	0.00032		11.4	6.60829	6.49339	6.49322	0.000169	6.47386	6.47584	-0.00198
11.45	6.80573	6.66459	6.66429	0.000297	6.76621	6.76461	0.001598		11.45	6.6085	6.49211	6.49311	-0.00099	6.47536	6.47578	-0.00042
11.5	6.80732	6.66437	6.66424	0.000137	6.76577	6.7646	0.001174		11.5	6.60712	6.49198	6.493	-0.00101	6.47482	6.47572	-0.0009
11.55	6.80622	6.6642	6.66418	2.04e-05	6.76543	6.76459	0.000848		11.55	6.60859	6.49158	6.49289	-0.00131	6.47577	6.47566	0.000111
11.6	6.80732	6.66353	6.66413	-0.0006	6.76618	6.76457	0.001603		11.6	6.60726	6.49226	6.49278	-0.00051	6.47585	6.4756	0.000251
11.65	6.80828	6.66454	6.66407	0.000468	6.76352	6.76456	-0.00104		11.65	6.60757	6.49317	6.49267	0.000499	6.47478	6.47554	-0.00076
11.7	6.8057	6.66552	6.66402	0.001499	6.76478	6.76455	0.000235		11.7	6.60766	6.49295	6.49256	0.000387	6.47553	6.47548	4.67e-05
11.75	6.80894	6.66547	6.66396	0.001506	6.76413	6.76454	-0.00041		11.75	6.60835	6.49134	6.49246	-0.00112	6.47484	6.47542	-0.00058
11.8	6.80663	6.66484	6.66391	0.000923	6.76348	6.76452	-0.00105		11.8	6.60933	6.4912	6.49235	-0.00115	6.47658	6.47537	0.001212
11.85	6.80818	6.66587	6.66386	0.002008	6.766	6.76451	0.001491		11.85	6.60908	6.49187	6.49224	-0.00037	6.47612	6.47531	0.000809
11.9	6.80933	6.66533	6.66381	0.001522	6.76496	6.7645	0.000464		11.9	6.60949	6.49145	6.49214	-0.00069	6.47649	6.47525	0.001235
11.95	6.80391	6.66282	6.66376	-0.00094	6.7637	6.76449	-0.00079		11.95	6.60912	6.49168	6.49203	-0.00035	6.47442	6.4752	-0.00078
12	6.80639	6.66503	6.66371	0.001325	6.76344	6.76448	-0.00104		12	6.60826	6.49051	6.49193	-0.00142	6.47568	6.47514	0.000538
12.05	6.80733	6.66662	6.66366	0.002968	6.76466	6.76447	0.000194		12.05	6.60905	6.49102	6.49182	-0.0008	6.47543	6.47509	0.00034
12.1	6.80841	6.66533	6.66361	0.001727	6.76355	6.76446	-0.0009		12.1	6.60819	6.49172	6.49172	2.5e-08	6.47446	6.47504	-0.00057
12.15	6.80738	6.66407	6.66356	0.000513	6.76557	6.76445	0.001122		12.15	6.60931	6.49072	6.49161	-0.0009	6.47561	6.47498	0.000632
12.2	6.80738	6.66398	6.66351	0.000472	6.76405	6.76444	-0.00039		12.2	6.61066	6.4916	6.49151	9.18e-05	6.47476	6.47493	-0.00017
12.25	6.80856	6.6644	6.66346	0.000945	6.76443	6.76443	8.84e-06		12.25	6.60804	6.48996	6.49141	-0.00145	6.47553	6.47488	0.000652
12.3	6.80611	6.6624	6.66341	-0.00101	6.76384	6.76442	-0.00058		12.3	6.60989	6.49031	6.49131	-0.001	6.47418	6.47483	-0.00064
12.35	6.80939	6.66498	6.66336	0.001621	6.76337	6.76441	-0.00104		12.35	6.60887	6.49242	6.49121	0.001216	6.47345	6.47478	-0.00133
12.4	6.80682	6.66352	6.66332	0.000204	6.76399	6.7644	-0.00041		12.4	6.61051	6.4903	6.4911	-0.00081	6.47496	6.47473	0.000237
12.45	6.80674	6.66451	6.66327	0.001241	6.76508	6.76439	0.000697		12.45	6.6085	6.49267	6.491	0.001663	6.47577	6.47468	0.001097
12.5	6.80859	6.66292	6.66322	-0.0003	6.7643	6.76438	-7.83e-05		12.5	6.60893	6.49082	6.4909	-8.37e-05	6.4742	6.47463	-0.00042
12.55	6.8071	6.6629	6.66318	-0.00028	6.76534	6.76437	0.000966		12.55	6.60774	6.49157	6.49081	0.000761	6.47391	6.47458	-0.00067
12.6	6.80572	6.66406	6.66313	0.000927	6.76244	6.76436	-0.00192		12.6	6.60693	6.49089	6.49071	0.000186	6.47468	6.47453	0.000153
12.65	6.80777	6.66571	6.66309	0.00262	6.76422	6.76435	-0.00013		12.65	6.60858	6.49039	6.49061	-0.00022	6.47563	6.47448	0.001148
12.7	6.8075	6.66345	6.66304	0.000405	6.76573	6.76434	0.001388		12.7	6.60789	6.49046	6.49051	-5.21e-05	6.47492	6.47443	0.000488
12.75	6.80989	6.6646	6.663	0.001603	6.76516	6.76433	0.000829		12.75	6.60771	6.48975	6.49041	-0.00066	6.47657	6.47438	0.002187
12.8	6.80732	6.66568	6.66296	0.002726	6.76467	6.76433	0.000347		12.8	6.60843	6.49066	6.49031	0.000345	6.47338	6.47434	-0.00095
12.85	6.80705	6.66487	6.66291	0.001959	6.76345	6.76432	-0.00087		12.85	6.60929	6.49005	6.49022	-0.00016	6.47601	6.47429	0.001722
12.9	6.80633	6.66504	6.66287	0.002172	6.76302	6.76431	-0.00129		12.9	6.60944	6.48943	6.49012	-0.00069	6.47254	6.47425	-0.00171
12.95	6.8079	6.6642	6.66283	0.00137	6.76374	6.7643	-0.00056		12.95	6.60888	6.48955	6.49002	-0.00048	6.47338	6.4742	-0.00082
13	6.80811	6.66331	6.66279	0.000522	6.76464	6.76429	0.000342		13	6.61021	6.49061	6.48993	0.000678	6.47635	6.47415	0.002193
13.05	6.80703	6.66475	6.66274	0.002007	6.7644	6.76429	0.000113		13.05	6.60912	6.48973	6.48983	-0.0001	6.47385	6.47411	-0.00026
13.1	6.8078	6.66399	6.6627	0.001289	6.76573	6.76428	0.001453		13.1	6.60833	6.49035	6.48974	0.000614	6.47347	6.47407	-0.0006
13.15	6.80685	6.66176	6.66266	-0.0009	6.76577	6.76427	0.001497		13.15	6.60804	6.48856	6.48965	-0.00108	6.47464	6.47402	0.00062
13.2	6.8077	6.66279	6.66262	0.000166	6.76631	6.76426	0.002045		13.2	6.60686	6.48916	6.48955	-0.00039	6.47383	6.47398	-0.00015
13.25	6.80596	6.66374	6.66258	0.001158	6.76626	6.76426	0.002005		13.25	6.60832	6.49015	6.48946	0.000694	6.47398	6.47393	4.2e-05
13.3	6.80882	6.66314	6.66254	0.0006	6.76545	6.76425	0.001196		13.3	6.60919	6.48925	6.48937	-0.00011	6.47621	6.47389	0.00232
13.35	6.80552	6.66284	6.6625	0.000334	6.76506	6.76424	0.000811		13.35	6.60744	6.49068	6.48927	0.001407	6.47468	6.47385	0.000829
13.4	6.80589	6.66371	6.66247	0.001247	6.7656	6.76424	0.001365		13.4	6.60843	6.48899	6.48918	-0.00019	6.47407	6.47381	0.000261
13.45	6.80717	6.66461	6.66243	0.002183	6.76476	6.76423	0.000527		13.45	6.60761	6.49094	6.48909	0.001855	6.47437	6.47377	0.0006
13.5	6.80477	6.66242	6.66239	2.88e-05	6.76573	6.76422	0.001503		13.5	6.60919	6.48908	6.489	8.09e-05	6.47464	6.47372	0.000912
13.55	6.8064	6.66134	6.66235	-0.00101	6.76583	6.76422	0.001608		13.55	6.60905	6.48869	6.48891	-0.00022	6.47243	6.47368	-0.00126
13.6	6.80674	6.66427	6.66231	0.001958	6.76357	6.76421	-0.00064		13.6	6.60833	6.4888	6.48882	-2.19e-05	6.4738	6.47364	0.000152
13.65	6.80846	6.66211	6.66228	-0.00017	6.76473	6.76421	0.000528		13.65	6.60918	6.48683	6.48873	-0.00189	6.47585	6.4736	0.00225
13.7	6.80586	6.6622	6.66224	-3.6e-05	6.76571	6.7642	0.001512		13.7	6.6073	6.48765	6.48864	-0.00099	6.474	6.47356	0.000438
13.75	6.80499	6.66423	6.6622	0.002028	6.76462	6.76419	0.000425		13.75	6.60934	6.48882	6.48855	0.000273	6.47349	6.47352	-2.95e-05
13.8	6.80604	6.66412	6.66217	0.001948	6.76431	6.76419	0.000122		13.8	6.60824	6.4884	6.48846	-6.55e-05	6.47493	6.47348	0.001441
13.85	6.80473	6.66206	6.66213	-7.24e-05	6.76495	6.76418	0.000768		13.85	6.60853	6.48692	6.48837	-0.00145	6.47382	6.47345	0.000371
13.9	6.80674	6.66252	6.6621	0.000422	6.76341	6.76418	-0.00076		13.9	6.6064	6.48683	6.48828	-0.00145	6.4721	6.47341	-0.00131
13.95	6.80877	6.6615	6.66206	-0.00056	6.76447	6.76417	0.000296		13.95	6.60967	6.48732	6.4882	-0.00088	6.47511	6.47337	0.001744
14	6.80673	6.66151	6.66203	-0.00051	6.76397	6.76417	-0.0002		14	6.60792	6.4858	6.48811	-0.00231	6.4724	6.47333	-0.00093
14.05	6.80836	6.66216	6.66199	0.000165	6.76287	6.76416	-0.00129		14.05	6.6095	6.48714	6.48802	-0.00088	6.47418	6.47329	0.000888
14.1	6.80805	6.66437	6.66196	0.00241	6.76595	6.76416	0.001793		14.1	6.60686	6.48672	6.48794	-0.00122	6.47481	6.47326	0.001553
14.15	6.80659	6.66372	6.66193	0.001791	6.76426	6.76415	0.000105		14.15	6.60827	6.48633	6.48785	-0.00152	6.47432	6.47322	0.001099
14.2	6.80766	6.66313	6.66189	0.001237	6.76309	6.76415	-0.00106		14.2	6.61024	6.48747	6.48777	-0.00029	6.47307	6.47318	-0.00011
14.25	6.80868	6.66267	6.66186	0.000811	6.76397	6.76414	-0.00017		14.25	6.60849	6.48551	6.48768	-0.00217	6.47542	6.47315	0.002268
14.3	6.80759	6.66205	6.66183	0.000219	6.76399	6.76414	-0.00015		14.3	6.60903	6.4855	6.4876	-0.0021	6.47143	6.47311	-0.00168
14.35	6.80739	6.66161	6.6618	-0.00019	6.76335	6.76413	-0.00078		14.35	6.60863	6.48588	6.48751	-0.00163	6.4734	6.47308	0.00032
14.4	6.80806	6.66488	6.66177	0.003116	6.76455	6.76413	0.000427		14.4	6.60741	6.48672	6.48743	-0.0007	6.47242	6.47304	-0.00062
14.45	6.80969	6.66139	6.66173	-0.00034	6.76452	6.76412	0.0004		14.45	6.60792	6.48634	6.48735	-0.00101	6.47197	6.47301	-0.00103
14.5	6.80671	6.66494	6.6617	0.003237	6.76476	6.76412	0.000647		14.5	6.60948	6.48582	6.48726	-0.00145	6.47156	6.47297	-0.00141
14.55	6.80686	6.66277	6.66167	0.001102	6.76447	6.76411	0.000355		14.55	6.60793	6.48697	6.48718	-0.00021	6.47107	6.47294	-0.00187
14.6	6.80635	6.66331	6.66164	0.001669	6.76532	6.76411	0.001209		14.6	6.60907	6.48641	6.4871	-0.00069	6.47136	6.4729	-0.00154
14.65	6.80772	6.66301	6.66161	0.001403	6.76148	6.7641	-0.00262		14.65	6.60841	6.48493	6.48702	-0.00209	6.47253	6.47287	-0.00034
14.7	6.80686	6.66266	6.66158	0.001077	6.76316	6.7641	-0.00094		14.7	6.60934	6.4836	6.48693	-0.00334	6.47117	6.47284	-0.00167
14.75	6.80879	6.66111	6.66155	-0.00044	6.76303	6.7641	-0.00107		14.75	6.60893	6.48466	6.48685	-0.0022	6.47154	6.4728	-0.00126
14.8	6.80734	6.66269	6.66152	0.001168	6.76354	6.76409	-0.00055		14.8	6.60871	6.48815	6.48677	0.001379	6.47323	6.47277	0.000458
14.85	6.80819	6.66128	6.66149	-0.00021	6.76458	6.76409	0.000491		14.85	6.60693	6.48769	6.48669	0.001001	6.4728	6.47274	6.62e-05
14.9	6.80843	6.66301	6.66146	0.001551	6.76436	6.76409	0.000279		14.9	6.6072	6.48707	6.48661	0.000454	6.46963	6.4727	-0.00307
14.95	6.80652	6.66419	6.66143	0.002758	6.76168	6.76408	-0.0024		14.95	6.60872	6.48526	6.48653	-0.00128	6.47161	6.47267	-0.00107
15	6.80918	6.66384	6.66141	0.002438	6.76323	6.76408	-0.00085		15	6.60636	6.48361	6.48645	-0.00284	6.4722	6.47264	-0.00044
15.05	6.8081	6.66205	6.66138	0.000674	6.76246	6.76407	-0.00161		15.05	6.60995	6.48587	6.48637	-0.00051	6.47102	6.47261	-0.00159
15.1	6.80807	6.662	6.66135	0.000649	6.76425	6.76407	0.000176		15.1	6.60792	6.48782	6.4863	0.001527	6.47187	6.47258	-0.00071
15.15	6.8077	6.66288	6.66132	0.001554	6.76353	6.76407	-0.00053		15.15	6.60867	6.48532	6.48622	-0.0009	6.47303	6.47255	0.000479
15.2	6.808	6.66234	6.6613	0.001042	6.7644	6.76406	0.000334		15.2	6.60934	6.48634	6.48614	0.000204	6.47243	6.47252	-8.22e-05
15.25	6.80946	6.66345	6.66127	0.002185	6.76234	6.76406	-0.00172		15.25	6.61118	6.48696	6.48606	0.000898	6.47122	6.47248	-0.00127
15.3	6.80776	6.66287	6.66124	0.001623	6.76468	6.76406	0.000619		15.3	6.60901	6.48617	6.48599	0.000182	6.4711	6.47245	-0.00135
15.35	6.80569	6.66205	6.66122	0.000831	6.76271	6.76405	-0.00134		15.35	6.60691	6.48641	6.48591	0.000497	6.47351	6.47242	0.001086
15.4	6.80699	6.6625	6.66119	0.001314	6.76374	6.76405	-0.00031		15.4	6.60829	6.48665	6.48583	0.000817	6.47376	6.47239	0.001363
15.45	6.80863	6.65961	6.66116	-0.00155	6.76342	6.76405	-0.00063		15.45	6.61035	6.4859	6.48576	0.000139	6.47353	6.47237	0.001162
15.5	6.81012	6.66169	6.66114	0.000552	6.76272	6.76404	-0.00132		15.5	6.60984	6.48562	6.48568	-5.84e-05	6.47311	6.47234	0.000777
15.55	6.8095	6.66133	6.66111	0.000213	6.76201	6.76404	-0.00203		15.55	6.60998	6.48595	6.48561	0.00034	6.47308	6.47231	0.000773
15.6	6.80887	6.66256	6.66109	0.001469	6.76401	6.76404	-2.38e-05		15.6	6.60882	6.48512	6.48553	-0.00041	6.47431	6.47228	0.002028
15.65	6.80757	6.66075	6.66106	-0.00031	6.7637	6.76404	-0.00034		15.65	6.60812	6.48601	6.48546	0.000549	6.47298	6.47225	0.000731
15.7	6.80786	6.66305	6.66104	0.002017	6.76252	6.76403	-0.00151		15.7	6.60844	6.48572	6.48538	0.000337	6.4726	6.47222	0.000382
15.75	6.80793	6.66246	6.66101	0.001447	6.76408	6.76403	5.07e-05		15.75	6.60967	6.48673	6.48531	0.00142	6.47154	6.47219	-0.00065
15.8	6.80908	6.66351	6.66099	0.002518	6.76193	6.76403	-0.0021		15.8	6.60901	6.48739	6.48524	0.002155	6.47304	6.47217	0.000872
15.85	6.81094	6.65951	6.66096	-0.00145	6.76264	6.76402	-0.00138		15.85	6.60857	6.48618	6.48516	0.00102	6.47209	6.47214	-5.12e-05
15.9	6.80993	6.66202	6.66094	0.001078	6.76427	6.76402	0.000246		15.9	6.60942	6.48624	6.48509	0.001149	6.47181	6.47211	-0.0003
15.95	6.80726	6.66264	6.66092	0.001719	6.76382	6.76402	-0.0002		15.95	6.60726	6.48512	6.48502	9.86e-05	6.4731	6.47208	0.001017
16	6.80851	6.66137	6.66089	0.00048	6.76261	6.76402	-0.0014		16	6.60976	6.48628	6.48494	0.00134	6.47057	6.47206	-0.00148
16.05	6.8079	6.66141	6.66087	0.000539	6.76071	6.76401	-0.0033		16.05	6.6089	6.4876	6.48487	0.002724	6.47197	6.47203	-5.47e-05
16.1	6.80663	6.66305	6.66085	0.002205	6.76084	6.76401	-0.00317		16.1	6.60983	6.48652	6.4848	0.001721	6.47163	6.472	-0.00038
16.15	6.8058	6.66204	6.66082	0.001217	6.76398	6.76401	-2.47e-05		16.15	6.6095	6.48417	6.48473	-0.00056	6.4728	6.47198	0.000827
16.2	6.80834	6.66197	6.6608	0.00117	6.76306	6.76401	-0.00094		16.2	6.60942	6.48706	6.48466	0.002396	6.4717	6.47195	-0.00025
16.25	6.80657	6.66181	6.66078	0.001025	6.76183	6.764	-0.00217		16.25	6.60924	6.48628	6.48459	0.001686	6.4701	6.47192	-0.00182
16.3	6.804	6.66066	6.66076	-9.53e-05	6.76466	6.764	0.000656		16.3	6.6079	6.48561	6.48452	0.001096	6.4716	6.4719	-0.0003
16.35	6.80612	6.66137	6.66074	0.000638	6.76277	6.764	-0.00123		16.35	6.60935	6.48656	6.48445	0.002114	6.47143	6.47187	-0.00044
16.4	6.80627	6.66135	6.66071	0.000633	6.76254	6.764	-0.00146		16.4	6.60815	6.48604	6.48438	0.001661	6.472	6.47185	0.000155
16.45	6.80777	6.66205	6.66069	0.001359	6.76259	6.764	-0.00141		16.45	6.60903	6.48377	6.48431	-0.00054	6.47311	6.47182	0.001289
16.5	6.80441	6.6641	6.66067	0.003428	6.76335	6.76399	-0.00064		16.5	6.60716	6.48396	6.48424	-0.00028	6.47039	6.4718	-0.00141
16.55	6.80722	6.66047	6.66065	-0.00018	6.76368	6.76399	-0.00031		16.55	6.60858	6.4856	6.48417	0.001426	6.47102	6.47177	-0.00075
16.6	6.80863	6.66164	6.66063	0.001008	6.76228	6.76399	-0.00171		16.6	6.60778	6.48378	6.4841	-0.00033	6.47283	6.47175	0.00108
16.65	6.80649	6.66168	6.66061	0.001073	6.76263	6.76399	-0.00136		16.65	6.60762	6.48537	6.48404	0.001335	6.47171	6.47172	-1.3e-05
16.7	6.80746	6.6614	6.66059	0.000807	6.76339	6.76398	-0.00059		16.7	6.60872	6.48426	6.48397	0.000294	6.4716	6.4717	-0.0001
16.75	6.80556	6.66031	6.66057	-0.00026	6.7633	6.76398	-0.00068		16.75	6.60704	6.48433	6.4839	0.000428	6.47246	6.47167	0.000786
16.8	6.80847	6.66417	6.66055	0.003622	6.7618	6.76398	-0.00218		16.8	6.60882	6.48276	6.48384	-0.00108	6.47099	6.47165	-0.00066
16.85	6.8067	6.66329	6.66053	0.002756	6.76195	6.76398	-0.00203		16.85	6.60939	6.48403	6.48377	0.000263	6.47288	6.47163	0.001248
16.9	6.80954	6.66236	6.66051	0.001848	6.76182	6.76398	-0.00216		16.9	6.60959	6.48433	6.4837	0.000625	6.472	6.4716	0.000394
16.95	6.80909	6.66285	6.66049	0.002357	6.76059	6.76398	-0.00339		16.95	6.60633	6.48221	6.48364	-0.00142	6.47193	6.47158	0.000349
17	6.80649	6.66233	6.66047	0.001862	6.76175	6.76397	-0.00222		17	6.6073	6.48359	6.48357	1.61e-05	6.47256	6.47156	0.000998
17.05	6.80645	6.66184	6.66045	0.001392	6.76123	6.76397	-0.00274		17.05	6.60746	6.48472	6.4835	0.001218	6.47167	6.47154	0.000137
17.1	6.80823	6.66421	6.66043	0.003773	6.76102	6.76397	-0.00295		17.1	6.61028	6.48355	6.48344	0.000107	6.47161	6.47151	0.000101
17.15	6.80777	6.66343	6.66042	0.003016	6.76162	6.76397	-0.00235		17.15	6.60926	6.48291	6.48337	-0.00046	6.47175	6.47149	0.000261
17.2	6.8087	6.66131	6.6604	0.000911	6.76352	6.76397	-0.00045		17.2	6.60598	6.4841	6.48331	0.000789	6.47231	6.47147	0.00084
17.25	6.80828	6.66164	6.66038	0.001262	6.76173	6.76397	-0.00224		17.25	6.60752	6.48479	6.48325	0.001547	6.47029	6.47145	-0.00116
17.3	6.80933	6.66409	6.66036	0.003728	6.76131	6.76396	-0.00265		17.3	6.60758	6.48257	6.48318	-0.00061	6.46986	6.47142	-0.00157
17.35	6.80948	6.66333	6.66034	0.002991	6.76262	6.76396	-0.00135		17.35	6.60645	6.48418	6.48312	0.001061	6.47023	6.4714	-0.00117
17.4	6.80856	6.66339	6.66032	0.003062	6.7621	6.76396	-0.00186		17.4	6.6087	6.48374	6.48306	0.000685	6.47225	6.47138	0.000868
17.45	6.80947	6.66326	6.66031	0.002958	6.76174	6.76396	-0.00222		17.45	6.6072	6.48384	6.48299	0.000851	6.46913	6.47136	-0.00223
17.5	6.80779	6.66306	6.66029	0.002767	6.76038	6.76396	-0.00358		17.5	6.6091	6.4837	6.48293	0.000766	6.47138	6.47134	3.85e-05
17.55	6.8093	6.66131	6.66027	0.00104	6.76296	6.76396	-0.001		17.55	6.60739	6.48348	6.48287	0.000609	6.46998	6.47132	-0.00134
17.6	6.80594	6.66236	6.66026	0.002101	6.76135	6.76395	-0.00261		17.6	6.60741	6.48331	6.48281	0.000503	6.47198	6.47129	0.000686
17.65	6.80835	6.66289	6.66024	0.002652	6.76311	6.76395	-0.00085		17.65	6.60869	6.48353	6.48274	0.000782	6.46985	6.47127	-0.00143
17.7	6.80869	6.66339	6.66022	0.003169	6.76206	6.76395	-0.00189		17.7	6.6104	6.48449	6.48268	0.001808	6.47074	6.47125	-0.00051
17.75	6.80736	6.66155	6.66021	0.001341	6.76293	6.76395	-0.00102		17.75	6.60932	6.4828	6.48262	0.00018	6.47073	6.47123	-0.0005
17.8	6.80829	6.66256	6.66019	0.002376	6.76165	6.76395	-0.0023		17.8	6.60805	6.48307	6.48256	0.000506	6.47178	6.47121	0.000563
17.85	6.80626	6.66212	6.66017	0.001947	6.76284	6.76395	-0.00111		17.85	6.60794	6.48264	6.4825	0.000138	6.46921	6.47119	-0.00198
17.9	6.80804	6.66405	6.66016	0.003894	6.76279	6.76395	-0.00116		17.9	6.60912	6.48256	6.48244	0.000119	6.47038	6.47117	-0.0008
17.95	6.80714	6.66217	6.66014	0.002025	6.76131	6.76395	-0.00263		17.95	6.60672	6.4818	6.48238	-0.00058	6.47081	6.47115	-0.00034
18	6.8078	6.66193	6.66012	0.001803	6.76208	6.76394	-0.00186		18	6.60925	6.48313	6.48232	0.000808	6.46997	6.47113	-0.00116
18.05	6.80744	6.66374	6.66011	0.003626	6.76259	6.76394	-0.00135		18.05	6.60879	6.48367	6.48226	0.001411	6.47229	6.47111	0.001178
18.1	6.80714	6.66175	6.66009	0.001656	6.76057	6.76394	-0.00337		18.1	6.60796	6.48313	6.4822	0.000928	6.47119	6.47109	9.26e-05
18.15	6.80681	6.66208	6.66008	0.001999	6.76146	6.76394	-0.00248		18.15	6.6083	6.48364	6.48214	0.001503	6.4695	6.47107	-0.00158
18.2	6.80903	6.66061	6.66006	0.000543	6.76186	6.76394	-0.00208		18.2	6.60919	6.48307	6.48208	0.000983	6.47002	6.47106	-0.00103
18.25	6.80558	6.66208	6.66005	0.00203	6.76328	6.76394	-0.00066		18.25	6.60987	6.48376	6.48202	0.001737	6.46998	6.47104	-0.00106
18.3	6.80756	6.66304	6.66003	0.003004	6.76306	6.76394	-0.00088		18.3	6.60893	6.48277	6.48196	0.000807	6.471	6.47102	-2.03e-05
18.35	6.80617	6.66244	6.66002	0.002425	6.76317	6.76394	-0.00077		18.35	6.60714	6.48428	6.48191	0.002368	6.47091	6.471	-9.06e-05
18.4	6.80674	6.66248	6.66	0.00248	6.76233	6.76393	-0.0016		18.4	6.60771	6.48262	6.48185	0.000771	6.47053	6.47098	-0.00045
18.45	6.81049	6.66133	6.65999	0.001339	6.75941	6.76393	-0.00452		18.45	6.60855	6.48352	6.48179	0.001729	6.47135	6.47096	0.000389
18.5	6.80791	6.6615	6.65997	0.001529	6.76235	6.76393	-0.00159		18.5	6.60769	6.48292	6.48173	0.001186	6.47005	6.47094	-0.00089
18.55	6.80602	6.66123	6.65996	0.00127	6.76249	6.76393	-0.00144		18.55	6.60868	6.48417	6.48168	0.002494	6.46879	6.47093	-0.00214
18.6	6.80529	6.6606	6.65995	0.00065	6.76397	6.76393	3.66e-05		18.6	6.60952	6.48181	6.48162	0.000189	6.47036	6.47091	-0.00054
18.65	6.80681	6.6612	6.65993	0.00127	6.76432	6.76393	0.000394		18.65	6.60781	6.4828	6.48156	0.001234	6.47107	6.47089	0.000185
18.7	6.80559	6.65965	6.65992	-0.00027	6.76465	6.76393	0.000718		18.7	6.60763	6.48033	6.48151	-0.00118	6.47165	6.47087	0.00078
18.75	6.80882	6.66023	6.65991	0.000323	6.76229	6.76393	-0.00163		18.75	6.60784	6.48235	6.48145	0.000901	6.47105	6.47085	0.000198
18.8	6.80701	6.66014	6.65989	0.000243	6.76177	6.76393	-0.00215		18.8	6.60823	6.48197	6.4814	0.000574	6.46977	6.47084	-0.00107
18.85	6.80511	6.66059	6.65988	0.000712	6.76298	6.76393	-0.00094		18.85	6.6077	6.48267	6.48134	0.001327	6.46991	6.47082	-0.00091
18.9	6.80471	6.66032	6.65987	0.000454	6.76322	6.76393	-0.00071		18.9	6.60855	6.48243	6.48129	0.001145	6.4723	6.4708	0.001501
18.95	6.80657	6.66142	6.65985	0.001571	6.76318	6.76392	-0.00074		18.95	6.60896	6.48217	6.48123	0.000934	6.4708	6.47079	1.8e-05
19	6.80731	6.66151	6.65984	0.001674	6.76305	6.76392	-0.00087		19	6.60679	6.48308	6.48118	0.001899	6.4685	6.47077	-0.00227
19.05	6.80756	6.65941	6.65983	-0.00042	6.76301	6.76392	-0.00091		19.05	6.60657	6.48216	6.48112	0.001033	6.47219	6.47075	0.001436
19.1	6.80591	6.66074	6.65981	0.000927	6.76275	6.76392	-0.00118		19.1	6.60815	6.48326	6.48107	0.002192	6.47222	6.47073	0.001484
19.15	6.80474	6.66043	6.6598	0.000632	6.76393	6.76392	5.1e-06		19.15	6.60753	6.48293	6.48102	0.001919	6.47075	6.47072	3.41e-05
19.2	6.80608	6.66027	6.65979	0.00048	6.76424	6.76392	0.000325		19.2	6.60752	6.48238	6.48096	0.001421	6.47165	6.4707	0.000945
19.25	6.80836	6.66147	6.65978	0.001692	6.76287	6.76392	-0.00105		19.25	6.60885	6.48254	6.48091	0.001629	6.47162	6.47069	0.000939
19.3	6.80567	6.66102	6.65976	0.001252	6.76379	6.76392	-0.00013		19.3	6.6068	6.48173	6.48086	0.000869	6.47015	6.47067	-0.00052
19.35	6.80453	6.66118	6.65975	0.001426	6.76391	6.76392	-1.17e-05		19.35	6.60813	6.48194	6.4808	0.001137	6.46935	6.47065	-0.0013
19.4	6.8058	6.66119	6.65974	0.001455	6.76265	6.76392	-0.00127		19.4	6.6071	6.48087	6.48075	0.000119	6.46967	6.47064	-0.00097
19.45	6.80718	6.65981	6.65973	8.34e-05	6.76186	6.76392	-0.00206		19.45	6.6089	6.4826	6.4807	0.001899	6.47116	6.47062	0.000538
19.5	6.80717	6.6615	6.65972	0.001782	6.76298	6.76392	-0.00094		19.5	6.60776	6.48162	6.48065	0.000975	6.47264	6.47061	0.002033
19.55	6.80707	6.6613	6.6597	0.001593	6.76477	6.76392	0.000858		19.55	6.60829	6.48032	6.48059	-0.00028	6.47069	6.47059	0.0001
19.6	6.80675	6.66264	6.65969	0.002949	6.76298	6.76391	-0.00093		19.6	6.60603	6.48042	6.48054	-0.00012	6.47168	6.47057	0.001101
19.65	6.8085	6.6628	6.65968	0.00312	6.76426	6.76391	0.000349		19.65	6.60756	6.47985	6.48049	-0.00064	6.47166	6.47056	0.001103
19.7	6.80555	6.65947	6.65967	-0.0002	6.76313	6.76391	-0.00079		19.7	6.60713	6.48041	6.48044	-3.17e-05	6.46918	6.47054	-0.00137
19.75	6.80639	6.66033	6.65966	0.000676	6.76391	6.76391	-6.1e-06		19.75	6.60781	6.48332	6.48039	0.002933	6.47224	6.47053	0.001711
19.8	6.80704	6.66035	6.65965	0.000706	6.76101	6.76391	-0.0029		19.8	6.60815	6.48087	6.48034	0.000534	6.47214	6.47051	0.001627
19.85	6.80758	6.65977	6.65964	0.000132	6.76304	6.76391	-0.00087		19.85	6.60768	6.48179	6.48029	0.001498	6.47046	6.4705	-4.01e-05
19.9	6.80557	6.66036	6.65963	0.000738	6.76443	6.76391	0.000516		19.9	6.609	6.48207	6.48024	0.001827	6.47107	6.47048	0.000589
19.95	6.80837	6.66174	6.65961	0.002124	6.76341	6.76391	-0.0005		19.95	6.60737	6.4788	6.48019	-0.00139	6.47087	6.47047	0.000403
20	6.80606	6.66108	6.6596	0.001481	6.76356	6.76391	-0.00035		20	6.60674	6.48076	6.48014	0.000616	6.46973	6.47046	-0.00072
20.05	6.80599	6.66004	6.65959	0.000451	6.76232	6.76391	-0.00159		20.05	6.6066	6.48263	6.48009	0.002538	6.47105	6.47044	0.00061
20.1	6.8054	6.66204	6.65958	0.002456	6.76216	6.76391	-0.00175		20.1	6.60719	6.48042	6.48004	0.000379	6.47071	6.47043	0.000289
20.15	6.80598	6.65967	6.65957	9.38e-05	6.76338	6.76391	-0.00053		20.15	6.60723	6.48035	6.47999	0.000362	6.47148	6.47041	0.001072
20.2	6.8076	6.66051	6.65956	0.000945	6.76301	6.76391	-0.00089		20.2	6.60695	6.48033	6.47994	0.00039	6.47077	6.4704	0.000374
20.25	6.80568	6.65922	6.65955	-0.00033	6.7612	6.76391	-0.00271		20.25	6.60788	6.48105	6.47989	0.001152	6.46964	6.47038	-0.00074
20.3	6.8043	6.6602	6.65954	0.000658	6.76258	6.76391	-0.00133		20.3	6.6054	6.47833	6.47985	-0.00151	6.46987	6.47037	-0.0005
20.35	6.80515	6.66149	6.65953	0.001958	6.76046	6.76391	-0.00345		20.35	6.60764	6.47967	6.4798	-0.00013	6.46851	6.47036	-0.00185
20.4	6.80511	6.65948	6.65952	-3.93e-05	6.76438	6.7639	0.000477		20.4	6.60775	6.47926	6.47975	-0.00049	6.47271	6.47034	0.002372
20.45	6.80454	6.66165	6.65951	0.002141	6.7621	6.7639	-0.00181		20.45	6.60923	6.47819	6.4797	-0.00151	6.47207	6.47033	0.001737
20.5	6.8039	6.66033	6.6595	0.000832	6.76064	6.7639	-0.00326		20.5	6.60922	6.47951	6.47966	-0.00015	6.46881	6.47032	-0.00151
20.55	6.80471	6.66177	6.65949	0.002279	6.76163	6.7639	-0.00228		20.55	6.60787	6.47838	6.47961	-0.00123	6.47035	6.4703	4.41e-05
20.6	6.80528	6.66079	6.65948	0.001306	6.76232	6.7639	-0.00159		20.6	6.60579	6.48006	6.47956	0.000497	6.46985	6.47029	-0.00044
20.65	6.80577	6.66081	6.65947	0.001332	6.76316	6.7639	-0.00074		20.65	6.60872	6.48006	6.47951	0.000547	6.47135	6.47028	0.00107
20.7	6.8059	6.65969	6.65946	0.000225	6.76354	6.7639	-0.00036		20.7	6.60815	6.47674	6.47947	-0.00273	6.46756	6.47026	-0.00271
20.75	6.80552	6.66081	6.65946	0.001353	6.76206	6.7639	-0.00184		20.75	6.60763	6.47952	6.47942	9.74e-05	6.47089	6.47025	0.000636
20.8	6.80473	6.65849	6.65945	-0.00096	6.76279	6.7639	-0.00112		20.8	6.60902	6.47963	6.47938	0.000255	6.47052	6.47024	0.000285
20.85	6.80302	6.65992	6.65944	0.000478	6.76271	6.7639	-0.00119		20.85	6.60798	6.47868	6.47933	-0.00065	6.46958	6.47022	-0.00064
20.9	6.80451	6.66229	6.65943	0.002858	6.76364	6.7639	-0.00026		20.9	6.60795	6.47929	6.47928	2.16e-06	6.47162	6.47021	0.001406
20.95	6.80735	6.66157	6.65942	0.002149	6.76321	6.7639	-0.00069		20.95	6.60621	6.47999	6.47924	0.000752	6.47034	6.4702	0.000144
21	6.80364	6.65858	6.65941	-0.00083	6.76388	6.7639	-2.25e-05		21	6.60902	6.47958	6.47919	0.000387	6.46825	6.47019	-0.00194
21.05	6.80395	6.66184	6.6594	0.002441	6.76415	6.7639	0.000254		21.05	6.60653	6.48074	6.47915	0.001589	6.46958	6.47017	-0.00059
21.1	6.80546	6.66105	6.65939	0.001655	6.76439	6.7639	0.000491		21.1	6.60639	6.47812	6.4791	-0.00098	6.46916	6.47016	-0.001
21.15	6.80712	6.65969	6.65938	0.000304	6.76232	6.7639	-0.00158		21.15	6.60862	6.47803	6.47906	-0.00102	6.4692	6.47015	-0.00095
21.2	6.80728	6.66015	6.65938	0.000778	6.76194	6.7639	-0.00196		21.2	6.60749	6.4795	6.47901	0.000486	6.47037	6.47014	0.000238
21.25	6.80687	6.66015	6.65937	0.000777	6.762	6.7639	-0.0019		21.25	6.60654	6.47908	6.47897	0.00011	6.46802	6.47012	-0.00211
21.3	6.80506	6.65957	6.65936	0.000213	6.76373	6.7639	-0.00017		21.3	6.61004	6.47873	6.47893	-0.00019	6.46888	6.47011	-0.00124
21.35	6.80533	6.65934	6.65935	-1.4e-05	6.76481	6.7639	0.000916		21.35	6.6086	6.47723	6.47888	-0.00166	6.46877	6.4701	-0.00133
21.4	6.80652	6.66057	6.65934	0.001229	6.76208	6.7639	-0.00181		21.4	6.60879	6.47836	6.47884	-0.00048	6.47004	6.47009	-4.62e-05
21.45	6.8093	6.66081	6.65934	0.00148	6.76218	6.7639	-0.00172		21.45	6.60707	6.47702	6.4788	-0.00177	6.47049	6.47008	0.000412
21.5	6.80655	6.65927	6.65933	-5.41e-05	6.76354	6.7639	-0.00035		21.5	6.60954	6.47988	6.47875	0.001125	6.47145	6.47007	0.001388
21.55	6.80569	6.65979	6.65932	0.000473	6.76456	6.7639	0.000661		21.55	6.60939	6.47981	6.47871	0.001104	6.47097	6.47005	0.000915
21.6	6.80503	6.65947	6.65931	0.000158	6.76376	6.7639	-0.00013		21.6	6.60918	6.47774	6.47867	-0.00093	6.47082	6.47004	0.000773
21.65	6.80651	6.66	6.6593	0.000698	6.76145	6.76389	-0.00244		21.65	6.60908	6.47826	6.47862	-0.00036	6.4712	6.47003	0.001168
21.7	6.80611	6.65879	6.6593	-0.0005	6.76323	6.76389	-0.00067		21.7	6.60942	6.47899	6.47858	0.000413	6.46901	6.47002	-0.00101
21.75	6.80676	6.6588	6.65929	-0.00049	6.76256	6.76389	-0.00134		21.75	6.61016	6.4794	6.47854	0.000861	6.47036	6.47001	0.000354
21.8	6.8045	6.65958	6.65928	0.000301	6.76518	6.76389	0.00129		21.8	6.60886	6.48039	6.4785	0.001893	6.46995	6.47	-4.62e-05
21.85	6.80846	6.6614	6.65927	0.002127	6.76169	6.76389	-0.00221		21.85	6.61017	6.47944	6.47846	0.000981	6.4695	6.46999	-0.00049
21.9	6.80802	6.66219	6.65927	0.002924	6.76451	6.76389	0.000616		21.9	6.60821	6.47828	6.47841	-0.00014	6.47122	6.46998	0.001248
21.95	6.80364	6.65979	6.65926	0.00053	6.76334	6.76389	-0.00055		21.95	6.60751	6.47928	6.47837	0.000912	6.4693	6.46996	-0.00066
22	6.80766	6.66053	6.65925	0.001278	6.76169	6.76389	-0.00221		22	6.60825	6.47892	6.47833	0.000586	6.47156	6.46995	0.001605
22.05	6.8069	6.66092	6.65924	0.001673	6.76219	6.76389	-0.0017		22.05	6.60912	6.47795	6.47829	-0.00035	6.4714	6.46994	0.001453
22.1	6.80563	6.65907	6.65924	-0.00016	6.76168	6.76389	-0.00221		22.1	6.60822	6.47963	6.47825	0.001381	6.47013	6.46993	0.000196
22.15	6.80805	6.66112	6.65923	0.00189	6.7621	6.76389	-0.0018		22.15	6.60763	6.47899	6.47821	0.000781	6.46941	6.46992	-0.00051
22.2	6.80686	6.65955	6.65922	0.000323	6.76395	6.76389	5.85e-05		22.2	6.60865	6.47873	6.47817	0.000562	6.47054	6.46991	0.000627
22.25	6.80879	6.66236	6.65922	0.003142	6.76214	6.76389	-0.00175		22.25	6.60825	6.47882	6.47813	0.000689	6.4698	6.4699	-0.0001
22.3	6.80672	6.66211	6.65921	0.002898	6.76405	6.76389	0.00016		22.3	6.60948	6.47929	6.47809	0.001199	6.46896	6.46989	-0.00093
22.35	6.80457	6.66016	6.6592	0.000958	6.76388	6.76389	-1.3e-05		22.35	6.60823	6.47827	6.47805	0.000226	6.46968	6.46988	-0.0002
22.4	6.80695	6.65997	6.6592	0.000776	6.7628	6.76389	-0.00109		22.4	6.60766	6.47873	6.47801	0.000718	6.47009	6.46987	0.000224
22.45	6.80515	6.65946	6.65919	0.000271	6.76341	6.76389	-0.00048		22.45	6.60768	6.48006	6.47797	0.00209	6.4698	6.46986	-6.22e-05
22.5	6.80797	6.66043	6.65918	0.001248	6.76311	6.76389	-0.00078		22.5	6.60675	6.48098	6.47793	0.003047	6.47057	6.46985	0.00072
22.55	6.80605	6.66102	6.65918	0.001841	6.76357	6.76389	-0.00032		22.55	6.60803	6.47895	6.47789	0.001062	6.4711	6.46984	0.001256
22.6	6.80905	6.66062	6.65917	0.001451	6.76414	6.76389	0.000251		22.6	6.60656	6.47869	6.47785	0.000834	6.46864	6.46983	-0.00119
22.65	6.80708	6.65991	6.65916	0.000751	6.76477	6.76389	0.00088		22.65	6.6075	6.48012	6.47781	0.002305	6.46953	6.46982	-0.00029
22.7	6.80861	6.66032	6.65916	0.001161	6.76203	6.76389	-0.00186		22.7	6.60726	6.4798	6.47777	0.002024	6.46988	6.46981	6.6e-05
22.75	6.80703	6.65991	6.65915	0.000762	6.76414	6.76389	0.000249		22.75	6.6078	6.4779	6.47774	0.000168	6.47007	6.4698	0.00027
22.8	6.80951	6.66298	6.65914	0.003839	6.76274	6.76389	-0.00115		22.8	6.60826	6.47892	6.4777	0.001224	6.47195	6.46979	0.002163
22.85	6.80942	6.66119	6.65914	0.00205	6.76432	6.76389	0.000433		22.85	6.6077	6.47774	6.47766	7.82e-05	6.47109	6.46978	0.00131
22.9	6.80758	6.66065	6.65913	0.001516	6.76384	6.76389	-4.55e-05		22.9	6.60848	6.47931	6.47762	0.001686	6.46994	6.46977	0.000171
22.95	6.80783	6.66123	6.65913	0.002102	6.76244	6.76389	-0.00145		22.95	6.60647	6.47797	6.47758	0.000384	6.47061	6.46976	0.000851
23	6.80897	6.66043	6.65912	0.001309	6.76493	6.76389	0.001037		23	6.60744	6.47717	6.47755	-0.00037	6.4693	6.46975	-0.00046
23.05	6.80701	6.66258	6.65911	0.003467	6.76293	6.76389	-0.00096		23.05	6.60669	6.47663	6.47751	-0.00088	6.46861	6.46974	-0.00113
23.1	6.80702	6.66152	6.65911	0.002413	6.76214	6.76389	-0.00175		23.1	6.60642	6.47642	6.47747	-0.00105	6.46793	6.46974	-0.00181
23.15	6.80583	6.65951	6.6591	0.000406	6.76212	6.76389	-0.00177		23.15	6.60785	6.47863	6.47743	0.001192	6.46805	6.46973	-0.00167
23.2	6.80811	6.65967	6.6591	0.000573	6.76304	6.76389	-0.00085		23.2	6.60822	6.4764	6.4774	-0.001	6.46944	6.46972	-0.00028
23.25	6.80671	6.66076	6.65909	0.001672	6.7635	6.76389	-0.00039		23.25	6.60683	6.47628	6.47736	-0.00108	6.47043	6.46971	0.000724
23.3	6.80545	6.66044	6.65909	0.00135	6.76104	6.76389	-0.00284		23.3	6.60822	6.47788	6.47733	0.000557	6.46876	6.4697	-0.00094
23.35	6.80455	6.66085	6.65908	0.001767	6.76174	6.76389	-0.00215		23.35	6.60723	6.47802	6.47729	0.000736	6.46825	6.46969	-0.00144
23.4	6.80728	6.66233	6.65907	0.003259	6.76326	6.76389	-0.00062		23.4	6.60884	6.47762	6.47725	0.00037	6.46827	6.46968	-0.00141
23.45	6.80861	6.65944	6.65907	0.000366	6.76172	6.76389	-0.00217		23.45	6.60754	6.47667	6.47722	-0.00054	6.46847	6.46967	-0.0012
23.5	6.80493	6.66266	6.65906	0.003599	6.76415	6.76389	0.00026		23.5	6.60608	6.47799	6.47718	0.000807	6.46776	6.46966	-0.0019
23.55	6.80391	6.66238	6.65906	0.003318	6.762	6.76389	-0.00188		23.55	6.60848	6.47819	6.47715	0.001047	6.4673	6.46966	-0.00236
23.6	6.80406	6.6597	6.65905	0.000651	6.76482	6.76389	0.000936		23.6	6.60812	6.47731	6.47711	0.000203	6.46766	6.46965	-0.00199
23.65	6.80821	6.66121	6.65905	0.002163	6.76334	6.76389	-0.00054		23.65	6.60732	6.4775	6.47707	0.000426	6.46779	6.46964	-0.00185
23.7	6.8055	6.65923	6.65904	0.000192	6.7651	6.76389	0.001211		23.7	6.60856	6.47899	6.47704	0.001949	6.46901	6.46963	-0.00062
23.75	6.8061	6.66103	6.65904	0.001994	6.76319	6.76389	-0.0007		23.75	6.60831	6.47688	6.477	-0.00012	6.46953	6.46962	-9.17e-05
23.8	6.80786	6.66169	6.65903	0.002656	6.76305	6.76389	-0.00084		23.8	6.60815	6.47804	6.47697	0.001067	6.47022	6.46961	0.00061
23.85	6.80537	6.66031	6.65903	0.001285	6.76288	6.76389	-0.00101		23.85	6.60758	6.47653	6.47693	-0.00041	6.46881	6.46961	-0.0008
23.9	6.80632	6.66135	6.65902	0.002327	6.76378	6.76388	-0.0001		23.9	6.60734	6.478	6.4769	0.001101	6.46858	6.4696	-0.00102
23.95	6.80882	6.66138	6.65902	0.002358	6.76248	6.76388	-0.00141		23.95	6.60827	6.47829	6.47687	0.00142	6.46961	6.46959	1.82e-05
24	6.80569	6.66041	6.65901	0.001396	6.76408	6.76388	0.000201		24	6.6072	6.47782	6.47683	0.000993	6.46818	6.46958	-0.0014
24.05	6.80525	6.65944	6.65901	0.000427	6.76411	6.76388	0.000227		24.05	6.6055	6.47923	6.4768	0.002428	6.46903	6.46957	-0.00054
24.1	6.80715	6.6593	6.659	0.000293	6.762	6.76388	-0.00189		24.1	6.60703	6.47801	6.47676	0.001244	6.46994	6.46957	0.000379
24.15	6.8098	6.65999	6.659	0.000988	6.76355	6.76388	-0.00033		24.15	6.6093	6.47692	6.47673	0.000191	6.46923	6.46956	-0.00033
24.2	6.80844	6.66019	6.65899	0.001197	6.76315	6.76388	-0.00074		24.2	6.60774	6.47765	6.4767	0.000951	6.46868	6.46955	-0.00087
24.25	6.80625	6.65998	6.65899	0.000995	6.76256	6.76388	-0.00133		24.25	6.60962	6.47686	6.47666	0.000201	6.46947	6.46954	-6.71e-05
24.3	6.80497	6.66054	6.65898	0.001556	6.76246	6.76388	-0.00142		24.3	6.60901	6.47731	6.47663	0.000677	6.46871	6.46953	-0.00083
24.35	6.80686	6.65806	6.65898	-0.00092	6.76401	6.76388	0.000131		24.35	6.60908	6.48009	6.4766	0.003497	6.4691	6.46953	-0.00043
24.4	6.80496	6.65856	6.65898	-0.00041	6.76347	6.76388	-0.00041		24.4	6.60823	6.47649	6.47656	-7.53e-05	6.47097	6.46952	0.001451
24.45	6.80517	6.66026	6.65897	0.001288	6.76193	6.76388	-0.00195		24.45	6.61006	6.47866	6.47653	0.002132	6.47037	6.46951	0.000854
24.5	6.80551	6.65978	6.65897	0.000812	6.76262	6.76388	-0.00126		24.5	6.60967	6.47704	6.4765	0.000546	6.46905	6.4695	-0.00045
24.55	6.80595	6.6603	6.65896	0.001336	6.76239	6.76388	-0.00149		24.55	6.6086	6.47931	6.47647	0.002839	6.47055	6.4695	0.001049
24.6	6.80727	6.65929	6.65896	0.000332	6.7627	6.76388	-0.00119		24.6	6.60763	6.47821	6.47643	0.001773	6.46984	6.46949	0.000354
24.65	6.80738	6.65997	6.65895	0.001013	6.7644	6.76388	0.000522		24.65	6.60803	6.479	6.4764	0.002598	6.46944	6.46948	-4.28e-05
24.7	6.80678	6.66107	6.65895	0.002119	6.76404	6.76388	0.000157		24.7	6.60833	6.4795	6.47637	0.003129	6.46994	6.46947	0.000462
24.75	6.80482	6.66048	6.65894	0.001532	6.76343	6.76388	-0.00045		24.75	6.60818	6.47752	6.47634	0.001179	6.46841	6.46947	-0.00106
24.8	6.80753	6.65878	6.65894	-0.00016	6.76245	6.76388	-0.00144		24.8	6.6092	6.47782	6.47631	0.001515	6.4704	6.46946	0.000942
24.85	6.80523	6.65954	6.65894	0.000608	6.76372	6.76388	-0.00016		24.85	6.60808	6.48045	6.47627	0.004174	6.47074	6.46945	0.001286
24.9	6.8041	6.66036	6.65893	0.001433	6.7643	6.76388	0.000418		24.9	6.6078	6.47815	6.47624	0.001904	6.46934	6.46945	-0.0001
24.95	6.80629	6.66072	6.65893	0.001787	6.7634	6.76388	-0.00049		24.95	6.60811	6.4786	6.47621	0.00239	6.46922	6.46944	-0.00022
25	6.8076	6.66009	6.65892	0.001164	6.76379	6.76388	-8.8e-05		25	6.6078	6.47738	6.47618	0.001202	6.4692	6.46943	-0.00023
25.05	6.80638	6.66087	6.65892	0.001947	6.7634	6.76388	-0.00049		25.05	6.60868	6.47938	6.47615	0.003232	6.47012	6.46943	0.000692
25.1	6.80712	6.65803	6.65892	-0.00089	6.76313	6.76388	-0.00076		25.1	6.60649	6.47731	6.47612	0.001195	6.47092	6.46942	0.001506
25.15	6.80722	6.65925	6.65891	0.000336	6.76272	6.76388	-0.00116		25.15	6.60803	6.47808	6.47609	0.001992	6.46928	6.46941	-0.00013
25.2	6.80736	6.66058	6.65891	0.001672	6.76107	6.76388	-0.00282		25.2	6.60831	6.47823	6.47606	0.002175	6.46987	6.4694	0.000462
25.25	6.80562	6.65913	6.6589	0.000226	6.76318	6.76388	-0.0007		25.25	6.60649	6.47629	6.47603	0.000265	6.47092	6.4694	0.001522
25.3	6.8064	6.6595	6.6589	0.000597	6.76467	6.76388	0.000787		25.3	6.60595	6.47657	6.476	0.000578	6.47181	6.46939	0.002423
25.35	6.80594	6.65945	6.6589	0.000551	6.76373	6.76388	-0.00015		25.35	6.60746	6.47687	6.47597	0.0009	6.46907	6.46938	-0.00032
25.4	6.80457	6.6602	6.65889	0.001307	6.7641	6.76388	0.000216		25.4	6.60713	6.47664	6.47594	0.000703	6.46926	6.46938	-0.00012
25.45	6.80467	6.66069	6.65889	0.001799	6.76251	6.76388	-0.00137		25.45	6.60779	6.47699	6.47591	0.001085	6.47	6.46937	0.000631
25.5	6.80613	6.66035	6.65889	0.001459	6.76269	6.76388	-0.0012		25.5	6.60756	6.47632	6.47588	0.000444	6.47006	6.46937	0.00069
25.55	6.80714	6.65951	6.65888	0.000628	6.76346	6.76388	-0.00042		25.55	6.6078	6.47453	6.47585	-0.00131	6.46948	6.46936	0.000125
25.6	6.80681	6.66038	6.65888	0.001502	6.76105	6.76388	-0.00283		25.6	6.61028	6.47637	6.47582	0.000555	6.47107	6.46935	0.001722
25.65	6.80629	6.66015	6.65887	0.001278	6.76261	6.76388	-0.00127		25.65	6.60733	6.47797	6.47579	0.002177	6.47045	6.46935	0.001104
25.7	6.80752	6.66008	6.65887	0.001206	6.7634	6.76388	-0.00048		25.7	6.60786	6.47389	6.47576	-0.00187	6.47021	6.46934	0.000868
25.75	6.80733	6.6596	6.65887	0.000732	6.76249	6.76388	-0.00139		25.75	6.60566	6.47484	6.47573	-0.00089	6.46912	6.46933	-0.00021
25.8	6.80501	6.65833	6.65886	-0.00053	6.76318	6.76388	-0.00071		25.8	6.6083	6.47419	6.4757	-0.00151	6.46897	6.46933	-0.00036
25.85	6.80679	6.65828	6.65886	-0.00059	6.76413	6.76388	0.000254		25.85	6.60785	6.47416	6.47567	-0.00151	6.46925	6.46932	-7.4e-05
25.9	6.80657	6.65949	6.65886	0.000635	6.76225	6.76388	-0.00163		25.9	6.60718	6.47545	6.47564	-0.00019	6.46779	6.46931	-0.00152
25.95	6.80674	6.65953	6.65885	0.000674	6.75974	6.76388	-0.00414		25.95	6.60699	6.4758	6.47562	0.000182	6.46951	6.46931	0.000204
26	6.80696	6.65888	6.65885	3.03e-05	6.76249	6.76388	-0.00139		26	6.60686	6.47472	6.47559	-0.00087	6.46891	6.4693	-0.00039
26.05	6.80702	6.65924	6.65885	0.000394	6.76274	6.76388	-0.00114		26.05	6.60597	6.47483	6.47556	-0.00073	6.4706	6.4693	0.001304
26.1	6.80599	6.65861	6.65884	-0.00024	6.76211	6.76388	-0.00177		26.1	6.60631	6.47578	6.47553	0.000245	6.46844	6.46929	-0.00085
26.15	6.80422	6.66063	6.65884	0.001793	6.76517	6.76388	0.001294		26.15	6.60722	6.47626	6.4755	0.000755	6.4675	6.46929	-0.00179
26.2	6.80533	6.66153	6.65884	0.002697	6.76253	6.76388	-0.00135		26.2	6.60887	6.47491	6.47548	-0.00057	6.46875	6.46928	-0.00053
26.25	6.80544	6.65938	6.65883	0.000548	6.76253	6.76388	-0.00136		26.25	6.6061	6.4753	6.47545	-0.00015	6.46882	6.46927	-0.00046
26.3	6.80673	6.65911	6.65883	0.00028	6.76214	6.76388	-0.00174		26.3	6.60693	6.47649	6.47542	0.001067	6.46862	6.46927	-0.00065
26.35	6.80628	6.66029	6.65883	0.001463	6.76284	6.76388	-0.00104		26.35	6.60784	6.47627	6.47539	0.000873	6.46995	6.46926	0.000691
26.4	6.80539	6.65863	6.65883	-0.00019	6.76319	6.76388	-0.00069		26.4	6.60623	6.47621	6.47537	0.000845	6.47032	6.46926	0.001061
26.45	6.80807	6.6602	6.65882	0.001379	6.76347	6.76388	-0.00041		26.45	6.60774	6.47542	6.47534	7.85e-05	6.47173	6.46925	0.002475
26.5	6.80553	6.6576	6.65882	-0.00122	6.76429	6.76388	0.000412		26.5	6.6064	6.47523	6.47531	-8.44e-05	6.47094	6.46925	0.00169
26.55	6.80571	6.65946	6.65882	0.000639	6.76241	6.76388	-0.00147		26.55	6.60621	6.47575	6.47528	0.000468	6.47043	6.46924	0.001192
26.6	6.80502	6.65983	6.65881	0.001019	6.7644	6.76388	0.000518		26.6	6.60619	6.47576	6.47526	0.000506	6.46924	6.46923	1.05e-05
26.65	6.80637	6.65985	6.65881	0.001043	6.76377	6.76388	-0.00011		26.65	6.60637	6.47718	6.47523	0.001945	6.46881	6.46923	-0.00042
26.7	6.80439	6.65996	6.65881	0.00115	6.76586	6.76388	0.001983		26.7	6.6073	6.47614	6.4752	0.000939	6.47015	6.46922	0.000927
26.75	6.8045	6.65768	6.6588	-0.00112	6.76371	6.76388	-0.00017		26.75	6.60858	6.47695	6.47518	0.001768	6.46881	6.46922	-0.0004
26.8	6.80537	6.66085	6.6588	0.002052	6.76406	6.76388	0.000177		26.8	6.6078	6.47832	6.47515	0.003169	6.47226	6.46921	0.003045
26.85	6.80495	6.65981	6.6588	0.001012	6.76404	6.76388	0.000163		26.85	6.60806	6.47562	6.47513	0.000498	6.46994	6.46921	0.000736
26.9	6.80362	6.66052	6.6588	0.001728	6.76336	6.76388	-0.00052		26.9	6.6084	6.47831	6.4751	0.003211	6.47102	6.4692	0.001816
26.95	6.80582	6.66082	6.65879	0.002024	6.76486	6.76388	0.00098		26.95	6.6091	6.47664	6.47507	0.001568	6.46828	6.4692	-0.00092
27	6.8059	6.66029	6.65879	0.001503	6.76613	6.76388	0.00225		27	6.60617	6.47689	6.47505	0.001846	6.46958	6.46919	0.000384
27.05	6.80436	6.6606	6.65879	0.001814	6.76437	6.76388	0.000493		27.05	6.60608	6.47754	6.47502	0.002515	6.46741	6.46919	-0.00178
27.1	6.80726	6.66001	6.65879	0.001223	6.76381	6.76388	-6.78e-05		27.1	6.60759	6.47712	6.475	0.002128	6.46771	6.46918	-0.00147
27.15	6.80507	6.66137	6.65878	0.002589	6.76442	6.76388	0.000537		27.15	6.6092	6.47647	6.47497	0.001503	6.4688	6.46918	-0.00038
27.2	6.8046	6.65946	6.65878	0.000679	6.76409	6.76388	0.000208		27.2	6.60717	6.47727	6.47494	0.002323	6.46939	6.46917	0.000221
27.25	6.80577	6.65811	6.65878	-0.00066	6.76265	6.76388	-0.00122		27.25	6.60674	6.47546	6.47492	0.000537	6.46833	6.46917	-0.00084
27.3	6.80612	6.66008	6.65878	0.001301	6.76555	6.76388	0.001673		27.3	6.6096	6.47657	6.47489	0.001672	6.46793	6.46916	-0.00123
27.35	6.80518	6.65813	6.65877	-0.00064	6.76437	6.76388	0.00049		27.35	6.60796	6.47484	6.47487	-2.53e-05	6.46921	6.46916	4.86e-05
27.4	6.80465	6.65946	6.65877	0.000686	6.76484	6.76388	0.000958		27.4	6.60715	6.47506	6.47484	0.000214	6.46854	6.46915	-0.00061
27.45	6.80698	6.6589	6.65877	0.000129	6.76509	6.76388	0.001212		27.45	6.6079	6.47673	6.47482	0.001914	6.46785	6.46915	-0.0013
27.5	6.80623	6.65883	6.65877	6.86e-05	6.76181	6.76388	-0.00206		27.5	6.60891	6.47667	6.4748	0.001874	6.46984	6.46914	0.000701
27.55	6.80684	6.65857	6.65876	-0.00019	6.76472	6.76388	0.000839		27.55	6.60728	6.47541	6.47477	0.000637	6.46895	6.46914	-0.00018
27.6	6.80706	6.65853	6.65876	-0.00023	6.76308	6.76388	-0.0008		27.6	6.60825	6.4763	6.47475	0.001552	6.46747	6.46913	-0.00166
27.65	6.80491	6.65922	6.65876	0.000461	6.76428	6.76388	0.000406		27.65	6.60767	6.47581	6.47472	0.001093	6.46947	6.46913	0.00034
27.7	6.8063	6.65958	6.65876	0.000825	6.76403	6.76388	0.000152		27.7	6.60796	6.4769	6.4747	0.002199	6.46939	6.46912	0.000263
27.75	6.80688	6.66	6.65875	0.001246	6.76498	6.76388	0.001098		27.75	6.60773	6.47634	6.47467	0.001671	6.46764	6.46912	-0.00148
27.8	6.80653	6.65898	6.65875	0.000226	6.7643	6.76388	0.00042		27.8	6.60617	6.47587	6.47465	0.001217	6.47051	6.46911	0.001394
27.85	6.80377	6.65988	6.65875	0.001131	6.76193	6.76388	-0.00195		27.85	6.60766	6.47412	6.47463	-0.00051	6.47035	6.46911	0.001239
27.9	6.80675	6.65856	6.65875	-0.00019	6.7639	6.76388	2.34e-05		27.9	6.60774	6.47373	6.4746	-0.00087	6.47209	6.4691	0.002983
27.95	6.8055	6.66021	6.65874	0.001463	6.76513	6.76388	0.001252		27.95	6.60845	6.47529	6.47458	0.000716	6.46984	6.4691	0.000745
28	6.80612	6.65874	6.65874	-3.27e-06	6.76257	6.76388	-0.00131		28	6.6075	6.47513	6.47455	0.000571	6.46868	6.4691	-0.00041
28.05	6.80594	6.66002	6.65874	0.001279	6.76343	6.76388	-0.00044		28.05	6.60764	6.47495	6.47453	0.00042	6.4714	6.46909	0.00231
28.1	6.80612	6.65837	6.65874	-0.00037	6.76376	6.76388	-0.00012		28.1	6.60863	6.47532	6.47451	0.000808	6.47041	6.46909	0.001327
28.15	6.80588	6.65896	6.65874	0.000224	6.76414	6.76388	0.000263		28.15	6.60748	6.47588	6.47449	0.001392	6.4692	6.46908	0.000116
28.2	6.80602	6.65892	6.65873	0.000192	6.76359	6.76388	-0.00028		28.2	6.60747	6.47572	6.47446	0.001256	6.47084	6.46908	0.001757
28.25	6.80357	6.65745	6.65873	-0.00128	6.76285	6.76388	-0.00102		28.25	6.60984	6.47428	6.47444	-0.00016	6.46821	6.46907	-0.00087
28.3	6.80495	6.66048	6.65873	0.001754	6.76255	6.76388	-0.00133		28.3	6.60873	6.47513	6.47442	0.000716	6.46649	6.46907	-0.00258
28.35	6.80619	6.66003	6.65873	0.001299	6.76358	6.76388	-0.00029		28.35	6.6083	6.47611	6.47439	0.001718	6.46847	6.46907	-0.00059
28.4	6.80658	6.6588	6.65872	7.67e-05	6.76458	6.76388	0.000697		28.4	6.60739	6.47501	6.47437	0.000639	6.47008	6.46906	0.001014
28.45	6.80846	6.66103	6.65872	0.002306	6.76449	6.76388	0.000614		28.45	6.60722	6.47514	6.47435	0.000791	6.46858	6.46906	-0.00048
28.5	6.80736	6.66052	6.65872	0.001797	6.76546	6.76388	0.001578		28.5	6.60664	6.47474	6.47433	0.000413	6.46921	6.46905	0.000153
28.55	6.80568	6.66034	6.65872	0.001626	6.76194	6.76388	-0.00194		28.55	6.60716	6.47576	6.4743	0.001455	6.46983	6.46905	0.000777
28.6	6.80589	6.65733	6.65872	-0.00139	6.76329	6.76388	-0.00059		28.6	6.60832	6.47505	6.47428	0.000767	6.46864	6.46904	-0.0004
28.65	6.80624	6.65896	6.65871	0.000242	6.76316	6.76388	-0.00071		28.65	6.60925	6.47664	6.47426	0.002382	6.46948	6.46904	0.000438
28.7	6.80678	6.6579	6.65871	-0.00081	6.765	6.76388	0.001124		28.7	6.60737	6.47457	6.47424	0.00033	6.46956	6.46904	0.000526
28.75	6.80552	6.65951	6.65871	0.0008	6.76449	6.76388	0.000609		28.75	6.60782	6.47492	6.47421	0.000701	6.46834	6.46903	-0.00069
28.8	6.80568	6.65903	6.65871	0.000324	6.76426	6.76388	0.00038		28.8	6.60847	6.47364	6.47419	-0.00055	6.46886	6.46903	-0.00017
28.85	6.80746	6.65966	6.65871	0.000957	6.76481	6.76388	0.000936		28.85	6.6072	6.47586	6.47417	0.001686	6.46874	6.46902	-0.00029
28.9	6.80673	6.65834	6.6587	-0.00037	6.76432	6.76388	0.000438		28.9	6.61023	6.47558	6.47415	0.001426	6.47054	6.46902	0.001517
28.95	6.80883	6.66153	6.6587	0.002826	6.76223	6.76388	-0.00165		28.95	6.60732	6.47652	6.47413	0.002391	6.47066	6.46902	0.001642
29	6.80684	6.66106	6.6587	0.002363	6.7632	6.76388	-0.00068		29	6.60741	6.47506	6.47411	0.000952	6.46973	6.46901	0.000721
29.05	6.80429	6.66062	6.6587	0.00192	6.76345	6.76388	-0.00043		29.05	6.6074	6.47494	6.47409	0.000859	6.47015	6.46901	0.001141
29.1	6.80694	6.66128	6.6587	0.002583	6.76384	6.76388	-3.47e-05		29.1	6.60742	6.47497	6.47406	0.00091	6.46973	6.46901	0.000728
29.15	6.80632	6.65976	6.6587	0.001063	6.76448	6.76388	0.000599		29.15	6.60791	6.47655	6.47404	0.002504	6.46907	6.469	7.21e-05
29.2	6.80759	6.65835	6.65869	-0.00034	6.76426	6.76388	0.00038		29.2	6.60687	6.47461	6.47402	0.000584	6.47051	6.469	0.00151
29.25	6.80609	6.65963	6.65869	0.000943	6.76253	6.76388	-0.00135		29.25	6.60953	6.47438	6.474	0.000377	6.46708	6.46899	-0.00191
29.3	6.80457	6.6598	6.65869	0.001108	6.76271	6.76388	-0.00116		29.3	6.6066	6.4765	6.47398	0.002523	6.46927	6.46899	0.000279
29.35	6.80714	6.65932	6.65869	0.000633	6.76332	6.76388	-0.00056		29.35	6.60771	6.47633	6.47396	0.002368	6.46857	6.46899	-0.00042
29.4	6.80682	6.65904	6.65869	0.000357	6.76429	6.76388	0.00041		29.4	6.60501	6.47572	6.47394	0.001784	6.46907	6.46898	8.34e-05
29.45	6.80667	6.66102	6.65868	0.002333	6.76272	6.76388	-0.00115		29.45	6.60514	6.47344	6.47392	-0.00047	6.4686	6.46898	-0.00038
29.5	6.80515	6.66056	6.65868	0.001873	6.76395	6.76388	6.87e-05		29.5	6.60735	6.47499	6.4739	0.001089	6.46711	6.46898	-0.00187
29.55	6.80622	6.66075	6.65868	0.002072	6.76434	6.76388	0.000459		29.55	6.60834	6.47596	6.47388	0.002084	6.4686	6.46897	-0.00037
29.6	6.8064	6.66095	6.65868	0.002275	6.76419	6.76388	0.000308		29.6	6.60788	6.47517	6.47386	0.001308	6.46702	6.46897	-0.00195
29.65	6.80717	6.66045	6.65868	0.00177	6.76195	6.76388	-0.00193		29.65	6.60681	6.47647	6.47384	0.002637	6.46999	6.46896	0.00103
29.7	6.8038	6.66252	6.65868	0.003839	6.76378	6.76388	-9.65e-05		29.7	6.60727	6.47457	6.47382	0.000754	6.46862	6.46896	-0.00034
29.75	6.80545	6.66118	6.65867	0.002506	6.7618	6.76388	-0.00208		29.75	6.60675	6.4753	6.4738	0.001507	6.46843	6.46896	-0.00053
29.8	6.80543	6.66184	6.65867	0.00317	6.7621	6.76388	-0.00177		29.8	6.60469	6.47489	6.47378	0.001112	6.46766	6.46895	-0.0013
29.85	6.80522	6.66237	6.65867	0.003703	6.76416	6.76388	0.000283		29.85	6.60686	6.47503	6.47376	0.001276	6.46808	6.46895	-0.00087
29.9	6.80561	6.6597	6.65867	0.001029	6.76508	6.76388	0.001202		29.9	6.60623	6.4751	6.47374	0.001363	6.46815	6.46895	-0.0008
29.95	6.80454	6.66007	6.65867	0.001406	6.76473	6.76388	0.000852		29.95	6.60699	6.47588	6.47372	0.00216	6.46998	6.46894	0.001032
30	6.8045	6.65948	6.65867	0.000815	6.76289	6.76388	-0.00098		30	6.60736	6.4755	6.4737	0.0018	6.46956	6.46894	0.00062
30.05	6.80638	6.66081	6.65867	0.002141	6.76424	6.76388	0.000365		30.05	6.60715	6.47542	6.47368	0.001742	6.46949	6.46894	0.000553
30.1	6.80593	6.65853	6.65866	-0.00013	6.76257	6.76388	-0.00131		30.1	6.60748	6.47541	6.47366	0.001753	6.4679	6.46893	-0.00103
30.15	6.80463	6.65889	6.65866	0.00023	6.76482	6.76388	0.000944		30.15	6.60674	6.47489	6.47364	0.001245	6.4675	6.46893	-0.00143
30.2	6.80571	6.65789	6.65866	-0.00077	6.76517	6.76388	0.001296		30.2	6.60588	6.47538	6.47362	0.001762	6.46922	6.46893	0.000291
30.25	6.80649	6.65989	6.65866	0.001233	6.76306	6.76388	-0.00081		30.25	6.60581	6.47289	6.4736	-0.00071	6.46872	6.46892	-0.0002
30.3	6.80507	6.65784	6.65866	-0.00082	6.76406	6.76388	0.00018		30.3	6.60442	6.47509	6.47358	0.001509	6.46959	6.46892	0.000665
30.35	6.80444	6.65954	6.65866	0.000887	6.76291	6.76388	-0.00097		30.35	6.60479	6.47475	6.47356	0.001188	6.46932	6.46892	0.000402
30.4	6.80726	6.65901	6.65866	0.000355	6.76425	6.76388	0.00037		30.4	6.60612	6.47405	6.47355	0.000502	6.46681	6.46891	-0.00211
30.45	6.80644	6.65974	6.65865	0.001085	6.7626	6.76388	-0.00128		30.45	6.60528	6.47382	6.47353	0.000292	6.46882	6.46891	-9.13e-05
30.5	6.80796	6.65976	6.65865	0.001108	6.76377	6.76388	-0.0001		30.5	6.60797	6.47463	6.47351	0.001125	6.46944	6.46891	0.000534
30.55	6.80952	6.65945	6.65865	0.000803	6.76373	6.76388	-0.00015		30.55	6.60651	6.47347	6.47349	-1.95e-05	6.4688	6.46891	-0.00011
30.6	6.80731	6.65615	6.65865	-0.0025	6.76301	6.76388	-0.00087		30.6	6.60729	6.47345	6.47347	-2.41e-05	6.47083	6.4689	0.001923
30.65	6.80548	6.6589	6.65865	0.000251	6.76292	6.76388	-0.00096		30.65	6.60702	6.47499	6.47345	0.001532	6.46895	6.4689	5.3e-05
30.7	6.80688	6.65819	6.65865	-0.00046	6.76382	6.76388	-5.57e-05		30.7	6.60685	6.47137	6.47343	-0.00206	6.4691	6.4689	0.000203
30.75	6.80804	6.65766	6.65865	-0.00099	6.76256	6.76388	-0.00132		30.75	6.60783	6.47504	6.47342	0.001627	6.46879	6.46889	-9.99e-05
30.8	6.80518	6.66022	6.65864	0.001571	6.7617	6.76388	-0.00218		30.8	6.60654	6.47398	6.4734	0.00058	6.46932	6.46889	0.000428
30.85	6.8038	6.65758	6.65864	-0.00106	6.76363	6.76388	-0.00024		30.85	6.60708	6.4736	6.47338	0.000222	6.46995	6.46889	0.001066
30.9	6.80639	6.65882	6.65864	0.000182	6.76339	6.76388	-0.00049		30.9	6.60621	6.47281	6.47336	-0.00055	6.46981	6.46888	0.000929
30.95	6.80614	6.66072	6.65864	0.002078	6.76363	6.76388	-0.00025		30.95	6.60725	6.47223	6.47334	-0.00112	6.46731	6.46888	-0.00157
31	6.80626	6.65922	6.65864	0.00058	6.76416	6.76388	0.000281		31	6.60687	6.4749	6.47333	0.00157	6.46832	6.46888	-0.00055
31.05	6.80521	6.65735	6.65864	-0.00129	6.76419	6.76388	0.000309		31.05	6.60786	6.47465	6.47331	0.001342	6.46973	6.46888	0.000856
31.1	6.80654	6.65892	6.65864	0.000286	6.76515	6.76388	0.001277		31.1	6.60653	6.47377	6.47329	0.000474	6.46768	6.46887	-0.0012
31.15	6.80722	6.65711	6.65864	-0.00153	6.76426	6.76388	0.000379		31.15	6.60701	6.47405	6.47327	0.000772	6.46904	6.46887	0.000166
31.2	6.80566	6.65772	6.65863	-0.00091	6.7646	6.76388	0.000718		31.2	6.60811	6.47211	6.47326	-0.00115	6.46804	6.46887	-0.00083
31.25	6.80399	6.65918	6.65863	0.000546	6.76273	6.76388	-0.00115		31.25	6.60858	6.47312	6.47324	-0.00012	6.46757	6.46886	-0.0013
31.3	6.80839	6.65922	6.65863	0.000587	6.76566	6.76388	0.001781		31.3	6.60825	6.47283	6.47322	-0.00039	6.46812	6.46886	-0.00074
31.35	6.80513	6.65839	6.65863	-0.00024	6.76442	6.76388	0.000545		31.35	6.60842	6.47435	6.4732	0.001147	6.46804	6.46886	-0.00082
31.4	6.80555	6.65942	6.65863	0.000792	6.76606	6.76388	0.002179		31.4	6.60703	6.47446	6.47319	0.001271	6.46891	6.46886	5.32e-05
31.45	6.80788	6.65827	6.65863	-0.00036	6.76425	6.76388	0.00037		31.45	6.60786	6.47342	6.47317	0.000249	6.46718	6.46885	-0.00168
31.5	6.80693	6.65837	6.65863	-0.00026	6.76506	6.76388	0.001181		31.5	6.60829	6.47074	6.47315	-0.00241	6.46807	6.46885	-0.00078
31.55	6.80758	6.65818	6.65863	-0.00044	6.7639	6.76388	1.92e-05		31.55	6.60841	6.47404	6.47314	0.000899	6.46965	6.46885	0.000804
31.6	6.80548	6.66017	6.65863	0.001545	6.76421	6.76388	0.000335		31.6	6.60782	6.47223	6.47312	-0.00089	6.46721	6.46885	-0.00163
31.65	6.80642	6.65834	6.65862	-0.00029	6.76475	6.76388	0.000872		31.65	6.60665	6.47413	6.4731	0.001025	6.46775	6.46884	-0.00109
31.7	6.80558	6.65833	6.65862	-0.00029	6.76332	6.76388	-0.00056		31.7	6.60717	6.47357	6.47309	0.000479	6.46774	6.46884	-0.0011
31.75	6.80467	6.65939	6.65862	0.000766	6.76428	6.76388	0.000399		31.75	6.60706	6.47405	6.47307	0.000978	6.4691	6.46884	0.000263
31.8	6.8059	6.65773	6.65862	-0.00089	6.76398	6.76388	0.000104		31.8	6.60704	6.47417	6.47305	0.001117	6.46872	6.46884	-0.00011
31.85	6.80791	6.65685	6.65862	-0.00177	6.76414	6.76388	0.000266		31.85	6.60776	6.47317	6.47304	0.000136	6.46967	6.46883	0.000833
31.9	6.80585	6.6578	6.65862	-0.00082	6.76371	6.76388	-0.00017		31.9	6.60851	6.4734	6.47302	0.000381	6.46974	6.46883	0.000915
31.95	6.80457	6.65768	6.65862	-0.00093	6.7641	6.76388	0.000227		31.95	6.60811	6.47293	6.473	-7.91e-05	6.46798	6.46883	-0.00085
32	6.8061	6.65791	6.65862	-0.00071	6.76537	6.76388	0.001497		32	6.60907	6.47406	6.47299	0.00107	6.46977	6.46883	0.000948
32.05	6.80836	6.65929	6.65862	0.000671	6.7649	6.76388	0.001025		32.05	6.60831	6.4735	6.47297	0.000529	6.46854	6.46882	-0.00029
32.1	6.80655	6.65753	6.65861	-0.00108	6.76623	6.76388	0.00235		32.1	6.60735	6.47254	6.47296	-0.00042	6.46773	6.46882	-0.00109
32.15	6.80734	6.65995	6.65861	0.001339	6.76569	6.76388	0.001813		32.15	6.60827	6.47491	6.47294	0.001968	6.46884	6.46882	1.79e-05
32.2	6.8054	6.65963	6.65861	0.001015	6.76282	6.76388	-0.00106		32.2	6.60731	6.47387	6.47292	0.000946	6.46784	6.46882	-0.00098
32.25	6.806	6.65953	6.65861	0.00092	6.76341	6.76388	-0.00046		32.25	6.60763	6.47436	6.47291	0.001452	6.46834	6.46881	-0.00048
32.3	6.80372	6.65664	6.65861	-0.00197	6.76325	6.76388	-0.00062		32.3	6.60915	6.47295	6.47289	5.57e-05	6.46942	6.46881	0.000608
32.35	6.80526	6.6568	6.65861	-0.00181	6.76263	6.76388	-0.00125		32.35	6.60779	6.4737	6.47288	0.000818	6.46919	6.46881	0.000382
32.4	6.80486	6.65722	6.65861	-0.00139	6.76617	6.76388	0.002293		32.4	6.608	6.47539	6.47286	0.002529	6.47066	6.46881	0.001852
32.45	6.80721	6.65842	6.65861	-0.00019	6.76466	6.76388	0.000781		32.45	6.6073	6.47411	6.47285	0.001263	6.46984	6.4688	0.001036
32.5	6.80659	6.65758	6.65861	-0.00103	6.76337	6.76388	-0.00051		32.5	6.60919	6.47394	6.47283	0.001107	6.47003	6.4688	0.001228
32.55	6.80678	6.65811	6.65861	-0.00049	6.76439	6.76388	0.000514		32.55	6.6076	6.47337	6.47281	0.000554	6.46869	6.4688	-0.00011
32.6	6.80628	6.65869	6.65861	8.27e-05	6.76569	6.76388	0.001812		32.6	6.60792	6.47431	6.4728	0.001513	6.47008	6.4688	0.001287
32.65	6.8052	6.65712	6.6586	-0.00148	6.76424	6.76388	0.000358		32.65	6.60806	6.47348	6.47278	0.0007	6.46938	6.46879	0.00059
32.7	6.80429	6.65718	6.6586	-0.00142	6.76509	6.76388	0.001209		32.7	6.60576	6.47346	6.47277	0.00069	6.46775	6.46879	-0.00104
32.75	6.80726	6.65778	6.6586	-0.00083	6.76436	6.76388	0.000486		32.75	6.60678	6.47293	6.47275	0.000173	6.46829	6.46879	-0.0005
32.8	6.80609	6.65682	6.6586	-0.00178	6.76466	6.76388	0.00078		32.8	6.60711	6.47322	6.47274	0.000485	6.46829	6.46879	-0.0005
32.85	6.80686	6.65922	6.6586	0.000624	6.76438	6.76388	0.000502		32.85	6.60629	6.47316	6.47272	0.000436	6.46758	6.46879	-0.00121
32.9	6.80623	6.65837	6.6586	-0.00023	6.76484	6.76388	0.000959		32.9	6.6062	6.47306	6.47271	0.00035	6.46727	6.46878	-0.00151
32.95	6.80837	6.66005	6.6586	0.00145	6.76241	6.76388	-0.00147		32.95	6.60736	6.4726	6.47269	-9.03e-05	6.46902	6.46878	0.000243
33	6.80688	6.6593	6.6586	0.0007	6.76432	6.76388	0.000439		33	6.60758	6.47212	6.47268	-0.00056	6.46912	6.46878	0.00034
33.05	6.8057	6.65841	6.6586	-0.00019	6.76333	6.76388	-0.00055		33.05	6.60734	6.47169	6.47266	-0.00097	6.46711	6.46878	-0.00166
33.1	6.80786	6.65872	6.6586	0.000123	6.76212	6.76388	-0.00176		33.1	6.60716	6.47343	6.47265	0.000782	6.46712	6.46877	-0.00165
33.15	6.80519	6.65835	6.6586	-0.00024	6.76464	6.76388	0.000766		33.15	6.60753	6.47458	6.47264	0.001941	6.46783	6.46877	-0.00095
33.2	6.80883	6.65892	6.6586	0.000326	6.76331	6.76388	-0.00056		33.2	6.60729	6.47213	6.47262	-0.00049	6.46973	6.46877	0.000963
33.25	6.80457	6.656	6.65859	-0.0026	6.76283	6.76388	-0.00105		33.25	6.60792	6.47073	6.47261	-0.00188	6.46745	6.46877	-0.00132
33.3	6.80475	6.65837	6.65859	-0.00023	6.76213	6.76388	-0.00175		33.3	6.60723	6.47325	6.47259	0.000653	6.46987	6.46877	0.001105
33.35	6.80922	6.65887	6.65859	0.000275	6.76485	6.76388	0.000976		33.35	6.60792	6.47336	6.47258	0.000777	6.47	6.46876	0.001233
33.4	6.80881	6.65865	6.65859	5.33e-05	6.76505	6.76388	0.001172		33.4	6.60814	6.47459	6.47256	0.002021	6.46999	6.46876	0.001232
33.45	6.80709	6.65997	6.65859	0.001383	6.76277	6.76388	-0.00111		33.45	6.60749	6.47488	6.47255	0.002326	6.46974	6.46876	0.000978
33.5	6.80609	6.65763	6.65859	-0.00096	6.7633	6.76388	-0.00058		33.5	6.60601	6.4736	6.47254	0.001065	6.47178	6.46876	0.003023
33.55	6.80668	6.65751	6.65859	-0.00108	6.76456	6.76388	0.000681		33.55	6.60784	6.47311	6.47252	0.000587	6.46931	6.46876	0.000556
33.6	6.80458	6.65881	6.65859	0.000217	6.76262	6.76388	-0.00126		33.6	6.60707	6.47387	6.47251	0.001366	6.46874	6.46875	-1.53e-05
33.65	6.8065	6.65788	6.65859	-0.00071	6.76359	6.76388	-0.00029		33.65	6.60606	6.47484	6.47249	0.002342	6.47182	6.46875	0.003069
33.7	6.80747	6.65979	6.65859	0.001197	6.76351	6.76388	-0.00037		33.7	6.6067	6.47353	6.47248	0.001055	6.46832	6.46875	-0.00043
33.75	6.80731	6.65941	6.65859	0.000822	6.7643	6.76388	0.000423		33.75	6.60668	6.47326	6.47247	0.000798	6.47032	6.46875	0.001569
33.8	6.80723	6.65799	6.65859	-0.00059	6.7629	6.76388	-0.00098		33.8	6.60521	6.47208	6.47245	-0.00037	6.47033	6.46875	0.00158
33.85	6.80661	6.65591	6.65859	-0.00267	6.76408	6.76388	0.000201		33.85	6.60631	6.47259	6.47244	0.000147	6.46857	6.46874	-0.00018
33.9	6.80588	6.65718	6.65858	-0.0014	6.7641	6.76388	0.000225		33.9	6.60747	6.47369	6.47243	0.001267	6.47106	6.46874	0.002315
33.95	6.80456	6.65856	6.65858	-2.2e-05	6.76315	6.76388	-0.00073		33.95	6.60735	6.4734	6.47241	0.000984	6.47082	6.46874	0.00208
34	6.80779	6.65953	6.65858	0.00095	6.76143	6.76388	-0.00244		34	6.60707	6.47319	6.4724	0.00079	6.46912	6.46874	0.000385
34.05	6.80437	6.65916	6.65858	0.000579	6.7649	6.76388	0.001018		34.05	6.60729	6.47299	6.47239	0.000603	6.46821	6.46874	-0.00053
34.1	6.80748	6.65638	6.65858	-0.00221	6.76339	6.76388	-0.00049		34.1	6.60826	6.47361	6.47237	0.001236	6.46912	6.46874	0.00038
34.15	6.80565	6.659	6.65858	0.000423	6.76534	6.76388	0.001464		34.15	6.60845	6.47439	6.47236	0.002035	6.46895	6.46873	0.000222
34.2	6.80482	6.65825	6.65858	-0.00033	6.76291	6.76388	-0.00097		34.2	6.60908	6.47142	6.47235	-0.00092	6.46798	6.46873	-0.00076
34.25	6.80761	6.65946	6.65858	0.000877	6.76312	6.76388	-0.00076		34.25	6.60871	6.4713	6.47233	-0.00103	6.46667	6.46873	-0.00206
34.3	6.80774	6.65793	6.65858	-0.00065	6.76291	6.76388	-0.00097		34.3	6.60664	6.47087	6.47232	-0.00145	6.46924	6.46873	0.000513
34.35	6.80582	6.65882	6.65858	0.000242	6.76455	6.76388	0.000677		34.35	6.61066	6.47326	6.47231	0.000957	6.46755	6.46873	-0.00118
34.4	6.80309	6.65778	6.65858	-0.0008	6.76269	6.76388	-0.00119		34.4	6.60695	6.47187	6.47229	-0.00042	6.46815	6.46872	-0.00058
34.45	6.80737	6.6592	6.65858	0.00062	6.7634	6.76388	-0.00048		34.45	6.60904	6.47431	6.47228	0.002034	6.47043	6.46872	0.001705
34.5	6.80483	6.66031	6.65858	0.001731	6.76421	6.76388	0.000329		34.5	6.60884	6.47276	6.47227	0.00049	6.46932	6.46872	0.000599
34.55	6.80731	6.65849	6.65858	-8.56e-05	6.76409	6.76388	0.000214		34.55	6.60738	6.47298	6.47225	0.00073	6.46909	6.46872	0.000373
34.6	6.80643	6.65688	6.65858	-0.00169	6.76455	6.76388	0.000677		34.6	6.60706	6.47107	6.47224	-0.00117	6.46931	6.46872	0.000588
34.65	6.80601	6.65896	6.65857	0.000385	6.76419	6.76388	0.000317		34.65	6.60831	6.47419	6.47223	0.001958	6.46932	6.46872	0.000603
34.7	6.80717	6.65824	6.65857	-0.00034	6.76424	6.76388	0.000367		34.7	6.60775	6.47285	6.47222	0.000636	6.46903	6.46871	0.000315
34.75	6.80611	6.65543	6.65857	-0.00315	6.76524	6.76388	0.001358		34.75	6.60893	6.4744	6.4722	0.002198	6.4701	6.46871	0.00139
34.8	6.80683	6.65731	6.65857	-0.00127	6.76493	6.76388	0.001051		34.8	6.60868	6.47324	6.47219	0.001053	6.47013	6.46871	0.001421
34.85	6.80595	6.65808	6.65857	-0.00049	6.76357	6.76388	-0.0003		34.85	6.6084	6.47181	6.47218	-0.00037	6.47084	6.46871	0.002127
34.9	6.80459	6.65705	6.65857	-0.00152	6.76527	6.76388	0.00139		34.9	6.60755	6.47334	6.47217	0.001172	6.4703	6.46871	0.00159
34.95	6.80715	6.65654	6.65857	-0.00203	6.76477	6.76388	0.00089		34.95	6.60711	6.47432	6.47215	0.002168	6.46969	6.46871	0.000983
35	6.8083	6.6579	6.65857	-0.00067	6.7659	6.76388	0.002022		35	6.60733	6.47142	6.47214	-0.00072	6.46969	6.4687	0.000989
35.05	6.80665	6.65782	6.65857	-0.00075	6.76526	6.76388	0.001384		35.05	6.60876	6.47241	6.47213	0.000276	6.4697	6.4687	0.000994
35.1	6.80396	6.65716	6.65857	-0.00141	6.76401	6.76388	0.000131		35.1	6.60833	6.47339	6.47212	0.001277	6.4693	6.4687	0.000604
35.15	6.80623	6.65876	6.65857	0.000189	6.76294	6.76388	-0.00094		35.15	6.60912	6.47354	6.47211	0.001433	6.47114	6.4687	0.002438
35.2	6.80566	6.65712	6.65857	-0.00144	6.76556	6.76388	0.001681		35.2	6.60722	6.47411	6.47209	0.002012	6.46973	6.4687	0.00103
35.25	6.80796	6.65913	6.65857	0.000562	6.76322	6.76388	-0.00066		35.25	6.60793	6.47051	6.47208	-0.00158	6.4686	6.4687	-9.81e-05
35.3	6.80487	6.6577	6.65857	-0.00087	6.76634	6.76388	0.002461		35.3	6.60841	6.47286	6.47207	0.000787	6.46827	6.46869	-0.00042
35.35	6.80404	6.65876	6.65857	0.000194	6.76491	6.76388	0.001034		35.35	6.60701	6.471	6.47206	-0.00106	6.46809	6.46869	-0.0006
35.4	6.80509	6.65867	6.65857	9.98e-05	6.76363	6.76388	-0.00025		35.4	6.60984	6.47312	6.47205	0.001078	6.46903	6.46869	0.000336
35.45	6.80769	6.65823	6.65857	-0.00034	6.76392	6.76388	4.74e-05		35.45	6.60707	6.47307	6.47203	0.001038	6.46846	6.46869	-0.00023
35.5	6.80513	6.6585	6.65856	-7e-05	6.76259	6.76388	-0.00129		35.5	6.60703	6.47174	6.47202	-0.00029	6.46977	6.46869	0.001081
35.55	6.80388	6.65805	6.65856	-0.00051	6.76484	6.76388	0.000959		35.55	6.60721	6.47175	6.47201	-0.00026	6.47078	6.46869	0.002089
35.6	6.80522	6.65876	6.65856	0.0002	6.76473	6.76388	0.000849		35.6	6.60797	6.47147	6.472	-0.00053	6.46899	6.46869	0.000307
35.65	6.80424	6.65883	6.65856	0.000263	6.76517	6.76388	0.00129		35.65	6.60639	6.47334	6.47199	0.001351	6.46985	6.46868	0.001167
35.7	6.8062	6.65792	6.65856	-0.00064	6.7636	6.76388	-0.00027		35.7	6.60585	6.47261	6.47198	0.000632	6.4704	6.46868	0.001719
35.75	6.80459	6.65907	6.65856	0.000506	6.76598	6.76388	0.002099		35.75	6.60616	6.47075	6.47197	-0.00121	6.46832	6.46868	-0.00036
35.8	6.80461	6.65868	6.65856	0.000118	6.76419	6.76388	0.000314		35.8	6.60697	6.4727	6.47195	0.000746	6.47012	6.46868	0.00144
35.85	6.80532	6.65732	6.65856	-0.00124	6.76529	6.76388	0.00141		35.85	6.60728	6.47169	6.47194	-0.00025	6.46908	6.46868	0.000397
35.9	6.80388	6.65936	6.65856	0.000796	6.76416	6.76388	0.000285		35.9	6.60636	6.47458	6.47193	0.002647	6.46998	6.46868	0.001305
35.95	6.80672	6.65614	6.65856	-0.00242	6.76444	6.76388	0.000568		35.95	6.60664	6.47406	6.47192	0.002138	6.47068	6.46868	0.002007
36	6.80536	6.65849	6.65856	-7.46e-05	6.76477	6.76388	0.000893		36	6.60592	6.47214	6.47191	0.000227	6.46823	6.46867	-0.00044
36.05	6.80579	6.65836	6.65856	-0.0002	6.76453	6.76388	0.000657		36.05	6.60795	6.47222	6.4719	0.000321	6.47084	6.46867	0.002165
36.1	6.80508	6.65797	6.65856	-0.00059	6.76447	6.76388	0.000593		36.1	6.60734	6.4733	6.47189	0.001417	6.4704	6.46867	0.001725
36.15	6.80558	6.65769	6.65856	-0.00087	6.76516	6.76388	0.001279		36.15	6.607	6.47321	6.47188	0.001336	6.46782	6.46867	-0.00085
36.2	6.80778	6.6567	6.65856	-0.00186	6.76543	6.76388	0.001554		36.2	6.60733	6.47338	6.47187	0.001517	6.46799	6.46867	-0.00067
36.25	6.80716	6.65799	6.65856	-0.00057	6.76326	6.76388	-0.00061		36.25	6.60626	6.47358	6.47185	0.001729	6.46694	6.46867	-0.00173
36.3	6.80541	6.6584	6.65856	-0.00016	6.76597	6.76388	0.002091		36.3	6.60759	6.47011	6.47184	-0.00173	6.469	6.46867	0.000335
36.35	6.80504	6.65776	6.65856	-0.0008	6.76386	6.76388	-1.94e-05		36.35	6.60633	6.47175	6.47183	-8.16e-05	6.46922	6.46866	0.000554
36.4	6.80568	6.66001	6.65856	0.001449	6.76416	6.76388	0.000278		36.4	6.60676	6.47214	6.47182	0.00032	6.46888	6.46866	0.000213
36.45	6.80575	6.65834	6.65856	-0.00022	6.76387	6.76388	-2.66e-06		36.45	6.60709	6.47133	6.47181	-0.00048	6.46836	6.46866	-0.0003
36.5	6.80446	6.65644	6.65856	-0.00212	6.7661	6.76388	0.002219		36.5	6.60753	6.47154	6.4718	-0.00027	6.47046	6.46866	0.001799
36.55	6.80615	6.65633	6.65856	-0.00223	6.76491	6.76388	0.001035		36.55	6.60758	6.47295	6.47179	0.001159	6.47034	6.46866	0.001677
36.6	6.80449	6.65747	6.65855	-0.00108	6.76606	6.76388	0.002185		36.6	6.60769	6.4724	6.47178	0.000621	6.46849	6.46866	-0.00017
36.65	6.80444	6.65699	6.65855	-0.00156	6.76258	6.76388	-0.00129		36.65	6.60607	6.47051	6.47177	-0.00125	6.46875	6.46866	9.22e-05
36.7	6.80609	6.65871	6.65855	0.000157	6.7641	6.76388	0.00022		36.7	6.60698	6.47169	6.47176	-7.34e-05	6.46765	6.46866	-0.00101
36.75	6.80524	6.65772	6.65855	-0.00083	6.76552	6.76388	0.001642		36.75	6.60837	6.46997	6.47175	-0.00177	6.46821	6.46865	-0.00044
36.8	6.80411	6.6577	6.65855	-0.00085	6.76483	6.76388	0.000953		36.8	6.60879	6.47024	6.47174	-0.0015	6.46969	6.46865	0.001033
36.85	6.80394	6.65843	6.65855	-0.00012	6.76591	6.76388	0.00203		36.85	6.60706	6.4695	6.47173	-0.00222	6.47033	6.46865	0.001675
36.9	6.80355	6.65729	6.65855	-0.00126	6.76468	6.76388	0.000801		36.9	6.6092	6.47102	6.47172	-0.0007	6.4684	6.46865	-0.00025
36.95	6.80272	6.65863	6.65855	7.82e-05	6.76477	6.76388	0.000889		36.95	6.60746	6.47032	6.47171	-0.00138	6.46846	6.46865	-0.00019
37	6.80573	6.65821	6.65855	-0.00034	6.76405	6.76388	0.000175		37	6.60888	6.4726	6.4717	0.000905	6.46918	6.46865	0.000528
37.05	6.80511	6.65781	6.65855	-0.00075	6.76544	6.76388	0.001562		37.05	6.6067	6.47076	6.47169	-0.00092	6.46884	6.46865	0.000197
37.1	6.80518	6.65806	6.65855	-0.00049	6.76448	6.76388	0.000604		37.1	6.60826	6.47031	6.47168	-0.00137	6.46794	6.46865	-0.0007
37.15	6.80424	6.65573	6.65855	-0.00282	6.76526	6.76388	0.001387		37.15	6.60871	6.47045	6.47167	-0.00122	6.46712	6.46864	-0.00153
37.2	6.80401	6.6585	6.65855	-5.49e-05	6.76555	6.76388	0.001676		37.2	6.60807	6.47294	6.47166	0.001284	6.47017	6.46864	0.001529
37.25	6.80526	6.6596	6.65855	0.001053	6.76378	6.76388	-9.88e-05		37.25	6.60791	6.46971	6.47165	-0.00193	6.46776	6.46864	-0.00088
37.3	6.80542	6.65821	6.65855	-0.00034	6.76335	6.76388	-0.00053		37.3	6.60819	6.4717	6.47164	6.56e-05	6.46867	6.46864	2.84e-05
37.35	6.80414	6.65817	6.65855	-0.00037	6.76547	6.76388	0.001588		37.35	6.60819	6.47292	6.47163	0.001294	6.46778	6.46864	-0.00086
37.4	6.80462	6.65857	6.65855	1.96e-05	6.76489	6.76388	0.001016		37.4	6.60653	6.47151	6.47162	-0.00011	6.46927	6.46864	0.000633
37.45	6.80523	6.65891	6.65855	0.000363	6.76488	6.76388	0.001003		37.45	6.608	6.47272	6.47161	0.001113	6.469	6.46864	0.000361
37.5	6.80339	6.65848	6.65855	-6.39e-05	6.76326	6.76388	-0.00062		37.5	6.6088	6.47169	6.4716	9.12e-05	6.47008	6.46864	0.001447
37.55	6.80449	6.65603	6.65855	-0.00251	6.76337	6.76388	-0.00051		37.55	6.6071	6.4708	6.47159	-0.00079	6.46882	6.46864	0.000187
37.6	6.80575	6.65677	6.65855	-0.00178	6.76445	6.76388	0.00057		37.6	6.6072	6.47071	6.47158	-0.00087	6.46906	6.46863	0.000425
37.65	6.80335	6.65837	6.65855	-0.00018	6.76331	6.76388	-0.00057		37.65	6.60624	6.46982	6.47157	-0.00175	6.46787	6.46863	-0.00077
37.7	6.80305	6.65755	6.65855	-0.00099	6.76482	6.76388	0.000939		37.7	6.60847	6.47177	6.47156	0.000213	6.46871	6.46863	7.63e-05
37.75	6.80422	6.6572	6.65855	-0.00135	6.76497	6.76388	0.001093		37.75	6.60858	6.46967	6.47155	-0.00188	6.46833	6.46863	-0.0003
37.8	6.80333	6.6569	6.65855	-0.00165	6.76315	6.76388	-0.00072		37.8	6.60846	6.47026	6.47154	-0.00128	6.46905	6.46863	0.000417
37.85	6.80557	6.65563	6.65855	-0.00292	6.76288	6.76388	-0.001		37.85	6.60719	6.47036	6.47153	-0.00118	6.46709	6.46863	-0.00154
37.9	6.80495	6.65777	6.65855	-0.00078	6.7652	6.76388	0.001327		37.9	6.60877	6.47014	6.47152	-0.00138	6.46883	6.46863	0.000206
37.95	6.80395	6.65683	6.65854	-0.00171	6.7642	6.76388	0.000322		37.95	6.60848	6.47055	6.47151	-0.00096	6.46796	6.46863	-0.00066
38	6.8015	6.65785	6.65854	-0.0007	6.76507	6.76388	0.001191		38	6.60663	6.47293	6.4715	0.001425	6.46722	6.46863	-0.00141
38.05	6.80536	6.65759	6.65854	-0.00095	6.76527	6.76388	0.001391		38.05	6.60769	6.47024	6.47149	-0.00125	6.46824	6.46862	-0.00038
38.1	6.8085	6.65659	6.65854	-0.00195	6.76406	6.76388	0.000186		38.1	6.60773	6.47098	6.47149	-0.00051	6.46901	6.46862	0.000384
38.15	6.80651	6.65702	6.65854	-0.00152	6.76549	6.76388	0.001609		38.15	6.60812	6.47084	6.47148	-0.00063	6.46954	6.46862	0.000919
38.2	6.80608	6.65635	6.65854	-0.0022	6.7658	6.76388	0.001921		38.2	6.60769	6.47117	6.47147	-0.0003	6.46754	6.46862	-0.00109
38.25	6.80365	6.65863	6.65854	8.96e-05	6.76453	6.76388	0.000655		38.25	6.60916	6.47115	6.47146	-0.00031	6.46833	6.46862	-0.00029
38.3	6.80613	6.6577	6.65854	-0.00084	6.76417	6.76388	0.000288		38.3	6.60753	6.4703	6.47145	-0.00115	6.46924	6.46862	0.00062
38.35	6.80611	6.65784	6.65854	-0.0007	6.76557	6.76388	0.001692		38.35	6.60942	6.47245	6.47144	0.001011	6.46958	6.46862	0.000965
38.4	6.80668	6.65575	6.65854	-0.0028	6.76401	6.76388	0.000132		38.4	6.60673	6.47118	6.47143	-0.00025	6.46895	6.46862	0.000336
38.45	6.80684	6.65676	6.65854	-0.00178	6.76447	6.76388	0.000592		38.45	6.60789	6.47245	6.47142	0.00103	6.46901	6.46862	0.000393
38.5	6.80714	6.65786	6.65854	-0.00069	6.76704	6.76388	0.003158		38.5	6.60669	6.47312	6.47141	0.001707	6.46768	6.46862	-0.00094
38.55	6.80539	6.65551	6.65854	-0.00304	6.76468	6.76388	0.000799		38.55	6.60649	6.47328	6.4714	0.001878	6.46849	6.46861	-0.00012
38.6	6.80437	6.6567	6.65854	-0.00184	6.76457	6.76388	0.000698		38.6	6.60841	6.47173	6.4714	0.000337	6.46912	6.46861	0.000504
38.65	6.80503	6.65787	6.65854	-0.00067	6.76536	6.76388	0.001488		38.65	6.60753	6.47054	6.47139	-0.00085	6.46786	6.46861	-0.00076
38.7	6.80752	6.65692	6.65854	-0.00162	6.76393	6.76388	4.82e-05		38.7	6.60809	6.47062	6.47138	-0.00076	6.46764	6.46861	-0.00097
38.75	6.80575	6.65638	6.65854	-0.00216	6.76284	6.76388	-0.00104		38.75	6.60712	6.47184	6.47137	0.000466	6.46635	6.46861	-0.00226
38.8	6.80563	6.65714	6.65854	-0.0014	6.76591	6.76388	0.002028		38.8	6.60864	6.47167	6.47136	0.000313	6.47063	6.46861	0.002023
38.85	6.80751	6.65602	6.65854	-0.00252	6.76509	6.76388	0.001211		38.85	6.60842	6.47013	6.47135	-0.00122	6.46893	6.46861	0.000321
38.9	6.80412	6.65643	6.65854	-0.00211	6.76402	6.76388	0.00014		38.9	6.60807	6.47082	6.47134	-0.00053	6.46735	6.46861	-0.00126
38.95	6.80513	6.65964	6.65854	0.001101	6.76472	6.76388	0.000844		38.95	6.60815	6.47228	6.47134	0.000945	6.46896	6.46861	0.000351
39	6.80622	6.65655	6.65854	-0.00199	6.76459	6.76388	0.000713		39	6.60998	6.47238	6.47133	0.001048	6.4691	6.46861	0.000493
39.05	6.80591	6.65767	6.65854	-0.00087	6.76516	6.76388	0.001286		39.05	6.60953	6.47196	6.47132	0.000645	6.4696	6.46861	0.000992
39.1	6.80523	6.6567	6.65854	-0.00184	6.76356	6.76388	-0.00032		39.1	6.60952	6.47182	6.47131	0.000505	6.46968	6.4686	0.001079
39.15	6.80443	6.65813	6.65854	-0.00041	6.76409	6.76388	0.000217		39.15	6.6083	6.47027	6.4713	-0.00103	6.46779	6.4686	-0.00081
39.2	6.80611	6.65639	6.65854	-0.00215	6.76263	6.76388	-0.00125		39.2	6.61131	6.472	6.47129	0.000707	6.46885	6.4686	0.000248
39.25	6.8043	6.65798	6.65854	-0.00056	6.76474	6.76388	0.000864		39.25	6.60766	6.47062	6.47129	-0.00066	6.4689	6.4686	0.000296
39.3	6.80601	6.65887	6.65854	0.000328	6.76586	6.76388	0.001984		39.3	6.60773	6.47125	6.47128	-2.88e-05	6.46811	6.4686	-0.00049
39.35	6.80629	6.65804	6.65854	-0.00049	6.76351	6.76388	-0.00037		39.35	6.60929	6.47113	6.47127	-0.00014	6.46874	6.4686	0.000135
39.4	6.80574	6.65765	6.65854	-0.00088	6.76434	6.76388	0.000466		39.4	6.60921	6.47149	6.47126	0.000225	6.4673	6.4686	-0.0013
39.45	6.80642	6.65821	6.65854	-0.00033	6.76431	6.76388	0.00043		39.45	6.60955	6.47209	6.47125	0.000836	6.46912	6.4686	0.000518
39.5	6.80661	6.65808	6.65854	-0.00046	6.76309	6.76388	-0.00079		39.5	6.6082	6.4718	6.47125	0.000555	6.46916	6.4686	0.000557
39.55	6.80532	6.65776	6.65854	-0.00077	6.76283	6.76388	-0.00105		39.55	6.60787	6.4717	6.47124	0.000466	6.46706	6.4686	-0.00154
39.6	6.80501	6.65886	6.65854	0.000322	6.76329	6.76388	-0.00059		39.6	6.6096	6.47236	6.47123	0.001128	6.4675	6.4686	-0.00109
39.65	6.80349	6.65807	6.65854	-0.00047	6.76439	6.76388	0.000509		39.65	6.60783	6.47002	6.47122	-0.0012	6.46841	6.4686	-0.00018
39.7	6.80558	6.65694	6.65854	-0.0016	6.76497	6.76388	0.001097		39.7	6.60617	6.47121	6.47121	4.37e-07	6.46995	6.46859	0.001357
39.75	6.80612	6.65737	6.65853	-0.00116	6.76668	6.76388	0.0028		39.75	6.60949	6.47031	6.47121	-0.0009	6.4696	6.46859	0.001007
39.8	6.80532	6.6577	6.65853	-0.00083	6.76482	6.76388	0.000946		39.8	6.60729	6.47058	6.4712	-0.00061	6.47037	6.46859	0.001776
39.85	6.80497	6.65798	6.65853	-0.00055	6.7642	6.76388	0.000326		39.85	6.60819	6.47129	6.47119	0.0001	6.46664	6.46859	-0.00195
39.9	6.80521	6.65958	6.65853	0.001043	6.76464	6.76388	0.000759		39.9	6.60759	6.47213	6.47118	0.000949	6.46601	6.46859	-0.00258
39.95	6.80503	6.65737	6.65853	-0.00116	6.76167	6.76388	-0.00221		39.95	6.60799	6.47102	6.47117	-0.00016	6.46736	6.46859	-0.00123
40	6.80609	6.65932	6.65853	0.00079	6.76383	6.76388	-5.03e-05		40	6.60702	6.4709	6.47117	-0.00027	6.46965	6.46859	0.001062
40.05	6.80661	6.65666	6.65853	-0.00187	6.76326	6.76388	-0.00061		40.05	6.60799	6.47155	6.47116	0.000392	6.46839	6.46859	-0.0002
40.1	6.80723	6.65906	6.65853	0.000527	6.76512	6.76388	0.001242		40.1	6.60641	6.46992	6.47115	-0.00123	6.46899	6.46859	0.000402
40.15	6.80635	6.65823	6.65853	-0.0003	6.76381	6.76388	-6.7e-05		40.15	6.60656	6.47019	6.47114	-0.00096	6.46791	6.46859	-0.00068
40.2	6.80495	6.65983	6.65853	0.001296	6.76543	6.76388	0.001554		40.2	6.60659	6.47044	6.47114	-0.0007	6.46902	6.46859	0.000433
40.25	6.80418	6.65987	6.65853	0.001342	6.76379	6.76388	-9.08e-05		40.25	6.60693	6.4715	6.47113	0.000371	6.46988	6.46859	0.00129
40.3	6.80689	6.65779	6.65853	-0.00074	6.76409	6.76388	0.000213		40.3	6.60696	6.47186	6.47112	0.000737	6.46604	6.46858	-0.00254
40.35	6.80568	6.65756	6.65853	-0.00097	6.7648	6.76388	0.000924		40.35	6.60842	6.47058	6.47111	-0.00053	6.4676	6.46858	-0.00098
40.4	6.80523	6.65886	6.65853	0.000328	6.76419	6.76388	0.000318		40.4	6.60629	6.47268	6.47111	0.00157	6.46893	6.46858	0.000346
40.45	6.80507	6.65781	6.65853	-0.00073	6.76452	6.76388	0.000647		40.45	6.60737	6.47168	6.4711	0.000584	6.46924	6.46858	0.000659
40.5	6.80733	6.65779	6.65853	-0.00075	6.76495	6.76388	0.001072		40.5	6.60741	6.47023	6.47109	-0.00086	6.46922	6.46858	0.000637
40.55	6.80582	6.65869	6.65853	0.000159	6.76498	6.76388	0.001102		40.55	6.60706	6.47083	6.47108	-0.00025	6.46871	6.46858	0.000131
40.6	6.80572	6.65906	6.65853	0.000533	6.764	6.76388	0.000125		40.6	6.60832	6.46866	6.47108	-0.00242	6.46826	6.46858	-0.00032
40.65	6.80551	6.65887	6.65853	0.000334	6.76461	6.76388	0.000729		40.65	6.60814	6.47043	6.47107	-0.00064	6.46787	6.46858	-0.00071
40.7	6.80572	6.66006	6.65853	0.001527	6.76555	6.76388	0.001673		40.7	6.60799	6.47248	6.47106	0.001414	6.46695	6.46858	-0.00163
40.75	6.80482	6.65848	6.65853	-5.49e-05	6.76589	6.76388	0.002016		40.75	6.6079	6.47142	6.47106	0.000364	6.46712	6.46858	-0.00146
40.8	6.80414	6.65856	6.65853	2.47e-05	6.76516	6.76388	0.001283		40.8	6.60742	6.46989	6.47105	-0.00116	6.46696	6.46858	-0.00162
40.85	6.80234	6.65805	6.65853	-0.00048	6.76504	6.76388	0.001162		40.85	6.60724	6.4711	6.47104	5.85e-05	6.46755	6.46858	-0.00102
40.9	6.80413	6.65798	6.65853	-0.00055	6.76313	6.76388	-0.00075		40.9	6.60775	6.47125	6.47103	0.000214	6.46636	6.46858	-0.00221
40.95	6.8053	6.65792	6.65853	-0.00061	6.76618	6.76388	0.002303		40.95	6.60621	6.47204	6.47103	0.001013	6.46723	6.46858	-0.00135
41	6.80338	6.65645	6.65853	-0.00208	6.76501	6.76388	0.001131		41	6.60678	6.4709	6.47102	-0.00012	6.46654	6.46858	-0.00203
41.05	6.80595	6.65681	6.65853	-0.00172	6.76609	6.76388	0.002214		41.05	6.60724	6.47163	6.47101	0.000619	6.46683	6.46857	-0.00175
41.1	6.80424	6.6565	6.65853	-0.00202	6.76567	6.76388	0.001792		41.1	6.60881	6.46926	6.47101	-0.00175	6.46623	6.46857	-0.00234
41.15	6.80447	6.65678	6.65853	-0.00175	6.76353	6.76388	-0.00035		41.15	6.60895	6.46897	6.471	-0.00203	6.46746	6.46857	-0.00111
41.2	6.80491	6.65834	6.65853	-0.00019	6.76479	6.76388	0.000911		41.2	6.60848	6.47065	6.47099	-0.00034	6.46803	6.46857	-0.00054
41.25	6.80584	6.65682	6.65853	-0.00171	6.7643	6.76388	0.000424		41.25	6.6095	6.47205	6.47099	0.00106	6.46753	6.46857	-0.00104
41.3	6.80753	6.65772	6.65853	-0.00081	6.76492	6.76388	0.001042		41.3	6.60794	6.47138	6.47098	0.000399	6.46835	6.46857	-0.00022
41.35	6.8073	6.65925	6.65853	0.000726	6.764	6.76388	0.000121		41.35	6.60836	6.47236	6.47097	0.001386	6.4664	6.46857	-0.00217
41.4	6.80652	6.65683	6.65853	-0.0017	6.76248	6.76388	-0.0014		41.4	6.60716	6.46983	6.47097	-0.00114	6.4684	6.46857	-0.00017
41.45	6.80544	6.65802	6.65853	-0.00051	6.76348	6.76388	-0.00039		41.45	6.60763	6.47012	6.47096	-0.00084	6.46681	6.46857	-0.00176
41.5	6.80691	6.65683	6.65853	-0.0017	6.76391	6.76388	2.84e-05		41.5	6.60898	6.47135	6.47095	0.000396	6.46821	6.46857	-0.00035
41.55	6.80629	6.6576	6.65853	-0.00093	6.76377	6.76388	-0.0001		41.55	6.60893	6.46981	6.47095	-0.00114	6.46911	6.46857	0.000537
41.6	6.80608	6.65637	6.65853	-0.00215	6.76341	6.76388	-0.00047		41.6	6.60907	6.47037	6.47094	-0.00057	6.47003	6.46857	0.001465
41.65	6.80686	6.65683	6.65853	-0.00169	6.76339	6.76388	-0.00049		41.65	6.60933	6.47066	6.47093	-0.00027	6.46678	6.46857	-0.00179
41.7	6.80585	6.65625	6.65853	-0.00228	6.76386	6.76388	-1.53e-05		41.7	6.60842	6.47106	6.47093	0.000138	6.46914	6.46857	0.000574
41.75	6.80447	6.65773	6.65853	-0.00079	6.76439	6.76388	0.000509		41.75	6.61001	6.46972	6.47092	-0.0012	6.46919	6.46857	0.000628
41.8	6.80546	6.65629	6.65853	-0.00223	6.76351	6.76388	-0.00037		41.8	6.60921	6.46975	6.47091	-0.00116	6.47161	6.46856	0.003041
41.85	6.80677	6.65733	6.65853	-0.00119	6.76414	6.76388	0.00026		41.85	6.60936	6.47088	6.47091	-2.75e-05	6.47021	6.46856	0.001648
41.9	6.80594	6.65756	6.65853	-0.00097	6.76344	6.76388	-0.00043		41.9	6.60954	6.47011	6.4709	-0.00079	6.47041	6.46856	0.001851
41.95	6.80305	6.65722	6.65853	-0.0013	6.76338	6.76388	-0.0005		41.95	6.60936	6.47052	6.47089	-0.00037	6.46981	6.46856	0.001251
42	6.80498	6.65714	6.65853	-0.00139	6.76488	6.76388	0.000998		42	6.60873	6.47036	6.47089	-0.00053	6.46809	6.46856	-0.00047
42.05	6.80334	6.65744	6.65853	-0.00108	6.76486	6.76388	0.000986		42.05	6.60814	6.47042	6.47088	-0.00046	6.46816	6.46856	-0.0004
42.1	6.80607	6.65739	6.65853	-0.00113	6.76333	6.76388	-0.00055		42.1	6.60785	6.4714	6.47088	0.000523	6.46903	6.46856	0.000473
42.15	6.8047	6.65595	6.65853	-0.00258	6.76387	6.76388	-7.36e-06		42.15	6.60744	6.47148	6.47087	0.000608	6.46699	6.46856	-0.00157
42.2	6.80346	6.65666	6.65853	-0.00187	6.76439	6.76388	0.000512		42.2	6.6086	6.47204	6.47086	0.001181	6.46989	6.46856	0.001328
42.25	6.80619	6.65674	6.65853	-0.00178	6.76431	6.76388	0.000428		42.25	6.60798	6.4716	6.47086	0.000742	6.46978	6.46856	0.001219
42.3	6.80615	6.65721	6.65853	-0.00132	6.76285	6.76388	-0.00103		42.3	6.6085	6.47026	6.47085	-0.00059	6.4684	6.46856	-0.00016
42.35	6.80483	6.65467	6.65853	-0.00386	6.76353	6.76388	-0.00035		42.35	6.60698	6.47097	6.47084	0.000121	6.46878	6.46856	0.000217
42.4	6.80605	6.65803	6.65853	-0.00049	6.76278	6.76388	-0.0011		42.4	6.60782	6.47121	6.47084	0.000367	6.4673	6.46856	-0.00126
42.45	6.80412	6.65568	6.65853	-0.00285	6.76378	6.76388	-9.4e-05		42.45	6.60753	6.46978	6.47083	-0.00106	6.46946	6.46856	0.000898
42.5	6.80466	6.65615	6.65853	-0.00238	6.76253	6.76388	-0.00134		42.5	6.6082	6.4702	6.47083	-0.00062	6.46985	6.46856	0.001293
42.55	6.80497	6.65643	6.65853	-0.00209	6.76221	6.76388	-0.00166		42.55	6.60686	6.47088	6.47082	6.22e-05	6.46782	6.46856	-0.00074
42.6	6.80562	6.65584	6.65853	-0.00268	6.7632	6.76388	-0.00068		42.6	6.60817	6.47115	6.47081	0.000331	6.46965	6.46856	0.001097
42.65	6.80412	6.65677	6.65852	-0.00176	6.76381	6.76388	-6.3e-05		42.65	6.60786	6.47195	6.47081	0.001145	6.46954	6.46856	0.000984
42.7	6.80365	6.65572	6.65852	-0.00281	6.76398	6.76388	0.000103		42.7	6.60875	6.47041	6.4708	-0.00039	6.46943	6.46855	0.00087
42.75	6.80652	6.65687	6.65852	-0.00165	6.76202	6.76388	-0.00185		42.75	6.60957	6.47091	6.4708	0.000116	6.46792	6.46855	-0.00063
42.8	6.80346	6.65753	6.65852	-0.00099	6.76356	6.76388	-0.00031		42.8	6.60755	6.47129	6.47079	0.000501	6.46888	6.46855	0.000323
42.85	6.8074	6.65677	6.65852	-0.00175	6.76405	6.76388	0.000175		42.85	6.60842	6.46925	6.47078	-0.00153	6.46893	6.46855	0.000375
42.9	6.80581	6.65622	6.65852	-0.0023	6.76396	6.76388	8.48e-05		42.9	6.60752	6.46897	6.47078	-0.00181	6.46852	6.46855	-3.04e-05
42.95	6.80686	6.65771	6.65852	-0.00081	6.76308	6.76388	-0.0008		42.95	6.60857	6.46963	6.47077	-0.00114	6.46982	6.46855	0.001271
43	6.80574	6.65696	6.65852	-0.00157	6.76332	6.76388	-0.00055		43	6.60971	6.47076	6.47077	-3.84e-06	6.46992	6.46855	0.001365
43.05	6.8051	6.65956	6.65852	0.001035	6.76426	6.76388	0.000383		43.05	6.60909	6.47031	6.47076	-0.00045	6.4675	6.46855	-0.00105
43.1	6.80447	6.65743	6.65852	-0.00109	6.76404	6.76388	0.000164		43.1	6.61012	6.47028	6.47075	-0.00048	6.46781	6.46855	-0.00074
43.15	6.8072	6.65833	6.65852	-0.0002	6.76407	6.76388	0.000191		43.15	6.60945	6.46905	6.47075	-0.0017	6.46881	6.46855	0.000262
43.2	6.80382	6.65851	6.65852	-1.43e-05	6.7637	6.76388	-0.00018		43.2	6.60984	6.47006	6.47074	-0.00068	6.46779	6.46855	-0.00076
43.25	6.80532	6.65466	6.65852	-0.00386	6.76609	6.76388	0.002218		43.25	6.60881	6.46923	6.47074	-0.00151	6.46975	6.46855	0.001205
43.3	6.80474	6.65804	6.65852	-0.00048	6.76415	6.76388	0.000273		43.3	6.6083	6.47046	6.47073	-0.00028	6.46837	6.46855	-0.00018
43.35	6.80521	6.658	6.65852	-0.00052	6.76338	6.76388	-0.00049		43.35	6.60721	6.47087	6.47073	0.000139	6.46744	6.46855	-0.00111
43.4	6.80558	6.6572	6.65852	-0.00132	6.76525	6.76388	0.00137		43.4	6.60819	6.47083	6.47072	0.000106	6.46929	6.46855	0.000743
43.45	6.80631	6.65648	6.65852	-0.00205	6.76441	6.76388	0.000531		43.45	6.60797	6.47086	6.47072	0.000147	6.46691	6.46855	-0.00164
43.5	6.80754	6.65666	6.65852	-0.00186	6.76371	6.76388	-0.00017		43.5	6.6078	6.47007	6.47071	-0.00064	6.46874	6.46855	0.000193
43.55	6.80593	6.65876	6.65852	0.000238	6.76542	6.76388	0.00154		43.55	6.60738	6.47046	6.4707	-0.00024	6.46901	6.46855	0.000465
43.6	6.80386	6.65799	6.65852	-0.00053	6.7641	6.76388	0.000221		43.6	6.60788	6.46905	6.4707	-0.00165	6.46911	6.46855	0.000566
43.65	6.80549	6.65829	6.65852	-0.00023	6.76478	6.76388	0.000907		43.65	6.60767	6.46959	6.47069	-0.0011	6.4685	6.46855	-4.78e-05
43.7	6.80716	6.65598	6.65852	-0.00255	6.76343	6.76388	-0.00045		43.7	6.60769	6.47014	6.47069	-0.00055	6.46978	6.46855	0.00123
43.75	6.80473	6.65723	6.65852	-0.00129	6.76215	6.76388	-0.00173		43.75	6.60705	6.46994	6.47068	-0.00074	6.46768	6.46854	-0.00086
43.8	6.80658	6.65651	6.65852	-0.00201	6.76473	6.76388	0.000857		43.8	6.6072	6.46995	6.47068	-0.00073	6.46712	6.46854	-0.00142
43.85	6.80596	6.65435	6.65852	-0.00417	6.76402	6.76388	0.000141		43.85	6.6072	6.46987	6.47067	-0.0008	6.46909	6.46854	0.000544
43.9	6.80529	6.65742	6.65852	-0.0011	6.76412	6.76388	0.000241		43.9	6.60719	6.46846	6.47067	-0.00221	6.46719	6.46854	-0.00135
43.95	6.80669	6.65649	6.65852	-0.00203	6.76492	6.76388	0.001039		43.95	6.6082	6.4702	6.47066	-0.00046	6.46915	6.46854	0.000611
44	6.80403	6.65672	6.65852	-0.0018	6.76385	6.76388	-2.33e-05		44	6.60834	6.46949	6.47066	-0.00116	6.46925	6.46854	0.00071
44.05	6.80307	6.65738	6.65852	-0.00115	6.76577	6.76388	0.001891		44.05	6.60691	6.4699	6.47065	-0.00075	6.46743	6.46854	-0.00111
44.1	6.80472	6.6569	6.65852	-0.00163	6.76632	6.76388	0.002441		44.1	6.60974	6.47069	6.47065	4.64e-05	6.46877	6.46854	0.000226
44.15	6.8052	6.65599	6.65852	-0.00253	6.76399	6.76388	0.000117		44.15	6.60639	6.46966	6.47064	-0.00098	6.46952	6.46854	0.000983
44.2	6.80498	6.65619	6.65852	-0.00234	6.76375	6.76388	-0.00012		44.2	6.60537	6.47005	6.47064	-0.00058	6.46777	6.46854	-0.00077
44.25	6.80588	6.65649	6.65852	-0.00204	6.76472	6.76388	0.000845		44.25	6.60724	6.47087	6.47063	0.000238	6.468	6.46854	-0.00054
44.3	6.80376	6.65515	6.65852	-0.00337	6.76361	6.76388	-0.00026		44.3	6.6057	6.47013	6.47062	-0.00049	6.46785	6.46854	-0.00069
44.35	6.80584	6.65677	6.65852	-0.00175	6.76333	6.76388	-0.00054		44.35	6.60596	6.46812	6.47062	-0.0025	6.46679	6.46854	-0.00175
44.4	6.80511	6.65475	6.65852	-0.00377	6.765	6.76388	0.001127		44.4	6.60756	6.46987	6.47061	-0.00075	6.46811	6.46854	-0.00043
44.45	6.8058	6.65585	6.65852	-0.00267	6.76598	6.76388	0.002098		44.45	6.60641	6.47048	6.47061	-0.00013	6.47007	6.46854	0.001535
44.5	6.80485	6.65639	6.65852	-0.00213	6.76519	6.76388	0.001312		44.5	6.60815	6.46925	6.4706	-0.00136	6.46932	6.46854	0.00078
44.55	6.80398	6.65588	6.65852	-0.00264	6.76531	6.76388	0.00143		44.55	6.60613	6.46976	6.4706	-0.00084	6.46961	6.46854	0.001073
44.6	6.80534	6.65595	6.65852	-0.00257	6.76437	6.76388	0.000493		44.6	6.60812	6.46976	6.47059	-0.00084	6.46875	6.46854	0.000216
44.65	6.80402	6.65537	6.65852	-0.00315	6.76424	6.76388	0.00036		44.65	6.60778	6.46839	6.47059	-0.0022	6.46875	6.46854	0.000209
44.7	6.804	6.6581	6.65852	-0.00042	6.76428	6.76388	0.0004		44.7	6.60781	6.46935	6.47058	-0.00124	6.46963	6.46854	0.001094
44.75	6.80544	6.6581	6.65852	-0.00042	6.76436	6.76388	0.000481		44.75	6.60504	6.4696	6.47058	-0.00098	6.46899	6.46854	0.000452
44.8	6.80586	6.65672	6.65852	-0.0018	6.76486	6.76388	0.000979		44.8	6.60772	6.4691	6.47057	-0.00148	6.46743	6.46854	-0.0011
44.85	6.80384	6.65778	6.65852	-0.00074	6.7641	6.76388	0.00022		44.85	6.6077	6.46932	6.47057	-0.00125	6.47038	6.46854	0.00184
44.9	6.8031	6.65786	6.65852	-0.00066	6.76508	6.76388	0.001203		44.9	6.60763	6.46874	6.47057	-0.00183	6.46861	6.46854	7.39e-05
44.95	6.8037	6.65633	6.65852	-0.00219	6.76348	6.76388	-0.0004		44.95	6.60555	6.46924	6.47056	-0.00132	6.46845	6.46853	-7.99e-05
45	6.80448	6.65746	6.65852	-0.00106	6.76327	6.76388	-0.00061		45	6.6087	6.4697	6.47056	-0.00086	6.46976	6.46853	0.001228
45.05	6.80491	6.65904	6.65852	0.000523	6.76409	6.76388	0.000214		45.05	6.60764	6.46917	6.47055	-0.00138	6.46812	6.46853	-0.00041
45.1	6.8031	6.65668	6.65852	-0.00184	6.7646	6.76388	0.000719		45.1	6.60865	6.46965	6.47055	-0.00089	6.46816	6.46853	-0.00037
45.15	6.80309	6.65944	6.65852	0.000919	6.76213	6.76388	-0.00174		45.15	6.6073	6.46833	6.47054	-0.00221	6.46931	6.46853	0.000774
45.2	6.80311	6.65828	6.65852	-0.00024	6.76522	6.76388	0.001341		45.2	6.60839	6.46908	6.47054	-0.00145	6.46886	6.46853	0.000322
45.25	6.80417	6.65752	6.65852	-0.001	6.76547	6.76388	0.00159		45.25	6.60878	6.46986	6.47053	-0.00067	6.46916	6.46853	0.000624
45.3	6.80222	6.65837	6.65852	-0.00015	6.76601	6.76388	0.002138		45.3	6.60798	6.4699	6.47053	-0.00062	6.47083	6.46853	0.002302
45.35	6.80036	6.65723	6.65852	-0.00129	6.76271	6.76388	-0.00117		45.35	6.60896	6.46992	6.47052	-0.0006	6.47007	6.46853	0.001535
45.4	6.80154	6.65733	6.65852	-0.00119	6.76483	6.76388	0.000955		45.4	6.60929	6.47086	6.47052	0.000339	6.46893	6.46853	0.000403
45.45	6.80286	6.65723	6.65852	-0.00129	6.76543	6.76388	0.001552		45.45	6.60886	6.47078	6.47051	0.000263	6.46828	6.46853	-0.00025
45.5	6.8037	6.65899	6.65852	0.000466	6.7645	6.76388	0.000624		45.5	6.60836	6.4698	6.47051	-0.0007	6.47074	6.46853	0.002213
45.55	6.80376	6.65842	6.65852	-9.73e-05	6.76435	6.76388	0.000477		45.55	6.60605	6.47032	6.4705	-0.00018	6.46885	6.46853	0.000315
45.6	6.80474	6.65864	6.65852	0.000122	6.76387	6.76388	-4.18e-06		45.6	6.60818	6.46946	6.4705	-0.00104	6.47092	6.46853	0.002389
45.65	6.80459	6.65713	6.65852	-0.00139	6.76658	6.76388	0.002699		45.65	6.60674	6.46874	6.47049	-0.00176	6.46844	6.46853	-9.08e-05
45.7	6.80447	6.65851	6.65852	-6.51e-06	6.76479	6.76388	0.000908		45.7	6.60675	6.46744	6.47049	-0.00305	6.46733	6.46853	-0.0012
45.75	6.80608	6.65835	6.65852	-0.00016	6.76302	6.76388	-0.00086		45.75	6.6081	6.46959	6.47049	-0.0009	6.47066	6.46853	0.00213
45.8	6.80514	6.65804	6.65852	-0.00048	6.76502	6.76388	0.00114		45.8	6.60745	6.47038	6.47048	-9.63e-05	6.46891	6.46853	0.000385
45.85	6.80463	6.65805	6.65852	-0.00047	6.76528	6.76388	0.001406		45.85	6.60734	6.46945	6.47048	-0.00103	6.46982	6.46853	0.001289
45.9	6.80296	6.65725	6.65852	-0.00127	6.76674	6.76388	0.002866		45.9	6.60754	6.47046	6.47047	-1.51e-05	6.46936	6.46853	0.00083
45.95	6.80531	6.65741	6.65852	-0.00111	6.76368	6.76388	-0.0002		45.95	6.60805	6.46825	6.47047	-0.00222	6.46859	6.46853	5.98e-05
46	6.80331	6.65788	6.65852	-0.00064	6.76463	6.76388	0.00075		46	6.60593	6.46843	6.47046	-0.00203	6.46808	6.46853	-0.00045
46.05	6.80349	6.65757	6.65852	-0.00094	6.76398	6.76388	9.91e-05		46.05	6.60661	6.47017	6.47046	-0.00029	6.46779	6.46853	-0.00074
46.1	6.8035	6.65851	6.65852	-7.56e-06	6.76247	6.76388	-0.00141		46.1	6.60675	6.46864	6.47046	-0.00181	6.46827	6.46853	-0.00025
46.15	6.80453	6.6584	6.65852	-0.00012	6.76431	6.76388	0.000436		46.15	6.60785	6.46977	6.47045	-0.00068	6.4695	6.46853	0.00097
46.2	6.80288	6.65645	6.65852	-0.00207	6.76279	6.76388	-0.00109		46.2	6.60778	6.46937	6.47045	-0.00108	6.46875	6.46853	0.00022
46.25	6.80586	6.65811	6.65852	-0.00041	6.76398	6.76388	0.000103		46.25	6.61007	6.46831	6.47044	-0.00213	6.46733	6.46853	-0.0012
46.3	6.80615	6.6583	6.65852	-0.00022	6.76598	6.76388	0.002107		46.3	6.60621	6.47096	6.47044	0.00052	6.46798	6.46853	-0.00054
46.35	6.80398	6.65869	6.65852	0.000175	6.76415	6.76388	0.000268		46.35	6.60673	6.46853	6.47043	-0.00191	6.46886	6.46853	0.000331
46.4	6.80402	6.66003	6.65852	0.001516	6.76446	6.76388	0.000588		46.4	6.60816	6.46911	6.47043	-0.00132	6.46868	6.46852	0.000154
46.45	6.80447	6.65846	6.65852	-5.56e-05	6.76594	6.76388	0.002067		46.45	6.60813	6.46836	6.47043	-0.00207	6.46836	6.46852	-0.00016
46.5	6.80541	6.65709	6.65852	-0.00143	6.76439	6.76388	0.000513		46.5	6.60657	6.46993	6.47042	-0.00049	6.46894	6.46852	0.000411
46.55	6.80371	6.65798	6.65852	-0.00054	6.76258	6.76388	-0.0013		46.55	6.60846	6.46819	6.47042	-0.00222	6.46746	6.46852	-0.00106
46.6	6.80241	6.65716	6.65852	-0.00135	6.76249	6.76388	-0.00138		46.6	6.60687	6.47049	6.47041	7.41e-05	6.46851	6.46852	-9.22e-06
46.65	6.80455	6.65789	6.65852	-0.00063	6.76223	6.76388	-0.00164		46.65	6.60949	6.47114	6.47041	0.000729	6.46864	6.46852	0.000117
46.7	6.80458	6.65637	6.65852	-0.00215	6.76512	6.76388	0.001244		46.7	6.60906	6.46919	6.4704	-0.00121	6.46852	6.46852	-7.04e-06
46.75	6.80506	6.65751	6.65852	-0.00101	6.76335	6.76388	-0.00052		46.75	6.60664	6.46972	6.4704	-0.00068	6.4672	6.46852	-0.00133
46.8	6.80534	6.65686	6.65852	-0.00165	6.76419	6.76388	0.000311		46.8	6.60676	6.46807	6.4704	-0.00233	6.46853	6.46852	9.43e-06
46.85	6.80437	6.65681	6.65852	-0.0017	6.76455	6.76388	0.000676		46.85	6.60803	6.4685	6.47039	-0.0019	6.46947	6.46852	0.000943
46.9	6.80433	6.65756	6.65852	-0.00096	6.76453	6.76388	0.000655		46.9	6.60942	6.46807	6.47039	-0.00232	6.46902	6.46852	0.000495
46.95	6.80491	6.65624	6.65852	-0.00228	6.76601	6.76388	0.002137		46.95	6.6058	6.46953	6.47038	-0.00086	6.46983	6.46852	0.001308
47	6.80559	6.65762	6.65852	-0.00089	6.76328	6.76388	-0.00059		47	6.60827	6.46595	6.47038	-0.00443	6.4682	6.46852	-0.00032
47.05	6.80631	6.65574	6.65852	-0.00278	6.76332	6.76388	-0.00056		47.05	6.6076	6.46924	6.47038	-0.00114	6.46843	6.46852	-9.33e-05
47.1	6.80467	6.65543	6.65852	-0.00309	6.7646	6.76388	0.000719		47.1	6.60921	6.46805	6.47037	-0.00232	6.46811	6.46852	-0.00041
47.15	6.80534	6.65743	6.65852	-0.00109	6.76414	6.76388	0.000265		47.15	6.60802	6.46894	6.47037	-0.00142	6.47021	6.46852	0.001685
47.2	6.8042	6.6573	6.65852	-0.00122	6.76375	6.76388	-0.00013		47.2	6.60664	6.46857	6.47036	-0.0018	6.46773	6.46852	-0.00079
47.25	6.80696	6.65564	6.65852	-0.00288	6.76262	6.76388	-0.00126		47.25	6.60889	6.46966	6.47036	-0.0007	6.46737	6.46852	-0.00115
47.3	6.80434	6.65745	6.65852	-0.00107	6.76496	6.76388	0.00108		47.3	6.60817	6.46932	6.47036	-0.00104	6.4678	6.46852	-0.00071
47.35	6.80406	6.65749	6.65852	-0.00102	6.76421	6.76388	0.00033		47.35	6.60921	6.46938	6.47035	-0.00097	6.46536	6.46852	-0.00316
47.4	6.80558	6.65996	6.65852	0.001441	6.76457	6.76388	0.00069		47.4	6.60774	6.47055	6.47035	0.000205	6.469	6.46852	0.00048
47.45	6.80666	6.65823	6.65852	-0.00029	6.76461	6.76388	0.000733		47.45	6.60851	6.46818	6.47035	-0.00216	6.46725	6.46852	-0.00127
47.5	6.80471	6.65694	6.65852	-0.00157	6.7641	6.76388	0.000227		47.5	6.60934	6.46899	6.47034	-0.00136	6.46876	6.46852	0.000241
47.55	6.80569	6.65544	6.65852	-0.00307	6.76568	6.76388	0.001808		47.55	6.61065	6.46854	6.47034	-0.0018	6.4679	6.46852	-0.00062
47.6	6.80544	6.65529	6.65852	-0.00323	6.76556	6.76388	0.001683		47.6	6.60786	6.46899	6.47033	-0.00135	6.4675	6.46852	-0.00102
47.65	6.80775	6.65773	6.65852	-0.00079	6.76489	6.76388	0.001013		47.65	6.60847	6.46788	6.47033	-0.00245	6.46736	6.46852	-0.00116
47.7	6.80857	6.65684	6.65852	-0.00168	6.76483	6.76388	0.000949		47.7	6.60916	6.47127	6.47033	0.000946	6.46756	6.46852	-0.00096
47.75	6.80553	6.65681	6.65852	-0.0017	6.76481	6.76388	0.000931		47.75	6.60825	6.47175	6.47032	0.001431	6.46889	6.46852	0.000375
47.8	6.80448	6.65752	6.65852	-0.001	6.76571	6.76388	0.00183		47.8	6.60836	6.46692	6.47032	-0.0034	6.46823	6.46852	-0.00028
47.85	6.80612	6.65795	6.65852	-0.00057	6.76431	6.76388	0.000434		47.85	6.60891	6.46891	6.47032	-0.00141	6.46803	6.46852	-0.00048
47.9	6.80586	6.65551	6.65852	-0.003	6.76557	6.76388	0.001696		47.9	6.60884	6.46861	6.47031	-0.0017	6.46758	6.46852	-0.00094
47.95	6.80337	6.65784	6.65852	-0.00067	6.76472	6.76388	0.00084		47.95	6.60679	6.4702	6.47031	-0.00011	6.46941	6.46852	0.000889
48	6.80397	6.65489	6.65852	-0.00362	6.76438	6.76388	0.000505		48	6.60738	6.46934	6.4703	-0.00096	6.46683	6.46852	-0.00169
48.05	6.80597	6.65587	6.65852	-0.00265	6.76436	6.76388	0.000487		48.05	6.60801	6.46962	6.4703	-0.00068	6.46574	6.46852	-0.00278
48.1	6.80481	6.65707	6.65852	-0.00145	6.76405	6.76388	0.000174		48.1	6.60744	6.47053	6.4703	0.000236	6.46853	6.46852	1.23e-05
48.15	6.80337	6.6569	6.65852	-0.00162	6.765	6.76388	0.001119		48.15	6.60778	6.47192	6.47029	0.001623	6.46809	6.46852	-0.00043
48.2	6.80689	6.65778	6.65852	-0.00074	6.7654	6.76388	0.001519		48.2	6.60787	6.46868	6.47029	-0.00161	6.46735	6.46852	-0.00117
48.25	6.8072	6.65803	6.65852	-0.00049	6.76479	6.76388	0.000911		48.25	6.60698	6.46836	6.47029	-0.00193	6.46675	6.46851	-0.00176
48.3	6.80412	6.65711	6.65852	-0.00141	6.76523	6.76388	0.001349		48.3	6.60872	6.46882	6.47028	-0.00146	6.46869	6.46851	0.000174
48.35	6.80461	6.65787	6.65852	-0.00065	6.76234	6.76388	-0.00153		48.35	6.6068	6.46964	6.47028	-0.00064	6.46866	6.46851	0.000146
48.4	6.80656	6.65762	6.65852	-0.00089	6.7652	6.76388	0.001325		48.4	6.60816	6.46904	6.47028	-0.00123	6.46672	6.46851	-0.0018
48.45	6.80343	6.6573	6.65852	-0.00121	6.76452	6.76388	0.000646		48.45	6.60755	6.46761	6.47027	-0.00266	6.46863	6.46851	0.000112
48.5	6.80503	6.65729	6.65852	-0.00123	6.76419	6.76388	0.000316		48.5	6.60651	6.46928	6.47027	-0.00099	6.46867	6.46851	0.000157
48.55	6.80526	6.65666	6.65852	-0.00185	6.76305	6.76388	-0.00083		48.55	6.60786	6.46753	6.47027	-0.00274	6.4668	6.46851	-0.00172
48.6	6.80481	6.65666	6.65852	-0.00186	6.76333	6.76388	-0.00055		48.6	6.6094	6.46877	6.47026	-0.00149	6.46678	6.46851	-0.00173
48.65	6.80298	6.65661	6.65852	-0.00191	6.76517	6.76388	0.001294		48.65	6.60782	6.46961	6.47026	-0.00065	6.46993	6.46851	0.00142
48.7	6.80563	6.65701	6.65852	-0.00151	6.76547	6.76388	0.001598		48.7	6.6089	6.46978	6.47026	-0.00048	6.46786	6.46851	-0.00065
48.75	6.80619	6.65714	6.65852	-0.00137	6.76469	6.76388	0.000813		48.75	6.60633	6.46974	6.47025	-0.00051	6.4684	6.46851	-0.00012
48.8	6.80584	6.65709	6.65852	-0.00143	6.76451	6.76388	0.00063		48.8	6.60737	6.46982	6.47025	-0.00043	6.4692	6.46851	0.000684
48.85	6.80431	6.65853	6.65852	1.67e-05	6.7649	6.76388	0.001023		48.85	6.60754	6.46828	6.47024	-0.00196	6.46747	6.46851	-0.00104
48.9	6.80549	6.65741	6.65852	-0.00111	6.76514	6.76388	0.001263		48.9	6.60724	6.47039	6.47024	0.000145	6.46723	6.46851	-0.00128
48.95	6.807	6.65556	6.65852	-0.00296	6.76203	6.76388	-0.00185		48.95	6.60811	6.46979	6.47024	-0.00044	6.46906	6.46851	0.000549
49	6.80545	6.6567	6.65852	-0.00181	6.76495	6.76388	0.00107		49	6.60964	6.47058	6.47024	0.00035	6.46839	6.46851	-0.00012
49.05	6.80629	6.65634	6.65852	-0.00218	6.76218	6.76388	-0.0017		49.05	6.60828	6.46984	6.47023	-0.00039	6.4673	6.46851	-0.00121
49.1	6.80411	6.65786	6.65852	-0.00066	6.76506	6.76388	0.001185		49.1	6.60861	6.4672	6.47023	-0.00303	6.46551	6.46851	-0.003
49.15	6.80511	6.65781	6.65852	-0.00071	6.764	6.76388	0.000119		49.15	6.60694	6.46891	6.47023	-0.00132	6.46743	6.46851	-0.00108
49.2	6.8048	6.65835	6.65852	-0.00017	6.76253	6.76388	-0.00134		49.2	6.60903	6.46921	6.47022	-0.00101	6.46713	6.46851	-0.00138
49.25	6.80628	6.65728	6.65852	-0.00123	6.76258	6.76388	-0.00129		49.25	6.60889	6.469	6.47022	-0.00122	6.46706	6.46851	-0.00145
49.3	6.80669	6.65694	6.65852	-0.00158	6.76337	6.76388	-0.0005		49.3	6.60812	6.46965	6.47022	-0.00056	6.47004	6.46851	0.001535
49.35	6.80422	6.65674	6.65852	-0.00178	6.7617	6.76388	-0.00218		49.35	6.60961	6.46634	6.47021	-0.00387	6.46752	6.46851	-0.00099
49.4	6.80598	6.65807	6.65852	-0.00044	6.76349	6.76388	-0.00039		49.4	6.60663	6.46819	6.47021	-0.00202	6.46758	6.46851	-0.00093
49.45	6.80561	6.65642	6.65852	-0.00209	6.76465	6.76388	0.000769		49.45	6.60838	6.46874	6.47021	-0.00146	6.46913	6.46851	0.000624
49.5	6.80697	6.65732	6.65852	-0.0012	6.76352	6.76388	-0.00035		49.5	6.60711	6.46884	6.4702	-0.00136	6.46689	6.46851	-0.00162
49.55	6.80716	6.65729	6.65852	-0.00122	6.76418	6.76388	0.000307		49.55	6.60892	6.46916	6.4702	-0.00104	6.46853	6.46851	2.01e-05
49.6	6.80451	6.65563	6.65852	-0.00289	6.76336	6.76388	-0.00051		49.6	6.60721	6.46728	6.4702	-0.00291	6.47066	6.46851	0.002146
49.65	6.80721	6.65634	6.65852	-0.00217	6.7635	6.76388	-0.00038		49.65	6.60888	6.46931	6.47019	-0.00089	6.46998	6.46851	0.001469
49.7	6.8047	6.65873	6.65852	0.000219	6.76398	6.76388	9.99e-05		49.7	6.60869	6.46764	6.47019	-0.00255	6.46804	6.46851	-0.00046
49.75	6.80801	6.65641	6.65852	-0.00211	6.76447	6.76388	0.000591		49.75	6.60832	6.46835	6.47019	-0.00184	6.46789	6.46851	-0.00062
49.8	6.80624	6.65878	6.65852	0.000263	6.76393	6.76388	5.54e-05		49.8	6.60815	6.4687	6.47018	-0.00149	6.46825	6.46851	-0.00026
49.85	6.8089	6.6565	6.65852	-0.00201	6.76353	6.76388	-0.00035		49.85	6.60771	6.46748	6.47018	-0.0027	6.46807	6.46851	-0.00044
49.9	6.80646	6.65799	6.65851	-0.00053	6.76316	6.76388	-0.00071		49.9	6.60821	6.46834	6.47018	-0.00184	6.46811	6.46851	-0.0004
49.95	6.80883	6.65552	6.65851	-0.003	6.76448	6.76388	0.000605		49.95	6.60694	6.46914	6.47018	-0.00103	6.46911	6.46851	0.000601
50	6.80897	6.65824	6.65851	-0.00028	6.76519	6.76388	0.001311		50	6.60722	6.46847	6.47017	-0.0017	6.46853	6.46851	2.02e-05
																0.000564
																0.000296
																0.000477
																0.00104
																0.000991
																0.000209
																0.0006
																3.27e-05
																-0.00109
																-0.00042
																3.29e-05
																-0.00054
																0.001053
																0.001706
																0.001019
																-7.48e-05
																-0.00264
																-0.00729
[truncated: 1 more rows]

## Sheet: WT Traces&Fits
WT	M2B 15HPZ.GFP	mix with Cy3ATP
Time	0.25 µM Data	0.25 µM Fit	0.5 µM Data	0.5 µM Fit	1.0 µM Data	1.0 µM Fit	1.5 µM Data	1.5 µM Fit	2.0 µM Data	2.0 µM Fit	2.5 µM Data	2.5 µM Fit
0.001	5.78777		5.76478		5.75403		5.73552		5.673		5.65372
0.002	5.79995	5.89548	5.82816	5.87446	5.76512	5.8454	5.72799	5.79935	5.70218	5.76672	5.67878	5.73654
0.003	5.84285	5.89546	5.85748	5.87438	5.80298	5.84524	5.7697	5.7991	5.74465	5.76639	5.7098	5.73607
0.004	5.86367	5.89544	5.8641	5.87431	5.82228	5.84508	5.7918	5.79885	5.7515	5.76606	5.73708	5.7356
0.005	5.87909	5.89542	5.85496	5.87424	5.8293	5.84491	5.82023	5.79861	5.75665	5.76573	5.73297	5.73514
0.006	5.87615	5.8954	5.8532	5.87416	5.82169	5.84475	5.8	5.79836	5.7489	5.76541	5.71001	5.73467
0.007	5.8617	5.89538	5.85843	5.87409	5.80932	5.84459	5.79812	5.79812	5.74818	5.76508	5.70884	5.73421
0.008	5.88126	5.89536	5.86134	5.87402	5.82593	5.84443	5.79031	5.79787	5.7551	5.76476	5.72011	5.73375
0.009	5.88455	5.89534	5.86974	5.87394	5.82679	5.84426	5.79706	5.79763	5.76386	5.76443	5.72693	5.73329
0.01	5.89471	5.89532	5.89411	5.87387	5.86451	5.8441	5.81569	5.79738	5.77367	5.76411	5.75091	5.73284
0.011	5.88464	5.8953	5.86992	5.8738	5.82945	5.84394	5.80331	5.79714	5.76343	5.76379	5.74141	5.73239
0.012	5.87851	5.89528	5.8763	5.87372	5.83661	5.84378	5.80638	5.7969	5.76168	5.76347	5.73669	5.73193
0.013	5.88506	5.89526	5.87926	5.87365	5.84904	5.84362	5.81151	5.79666	5.75477	5.76315	5.73814	5.73149
0.014	5.88105	5.89524	5.84996	5.87358	5.83104	5.84346	5.81306	5.79642	5.77245	5.76283	5.72659	5.73104
0.015	5.88082	5.89522	5.87714	5.8735	5.84404	5.8433	5.81198	5.79618	5.77063	5.76252	5.73063	5.7306
0.016	5.89184	5.8952	5.87531	5.87343	5.84464	5.84314	5.80335	5.79594	5.76756	5.7622	5.73095	5.73015
0.017	5.89455	5.89518	5.88846	5.87336	5.83056	5.84298	5.79347	5.7957	5.76206	5.76189	5.74499	5.72971
0.018	5.88424	5.89516	5.87133	5.87329	5.85224	5.84282	5.77992	5.79546	5.76896	5.76158	5.72827	5.72928
0.019	5.88933	5.89514	5.87661	5.87321	5.83358	5.84266	5.79748	5.79522	5.7601	5.76126	5.73192	5.72884
0.02	5.89477	5.89512	5.88102	5.87314	5.84482	5.84251	5.79177	5.79498	5.77387	5.76095	5.73609	5.72841
0.021	5.88927	5.8951	5.87633	5.87307	5.84885	5.84235	5.81032	5.79475	5.76686	5.76064	5.72999	5.72798
0.022	5.90526	5.89508	5.86005	5.873	5.85268	5.84219	5.79273	5.79451	5.76194	5.76033	5.72869	5.72755
0.023	5.89179	5.89506	5.85829	5.87292	5.8491	5.84203	5.80752	5.79427	5.76907	5.76002	5.72071	5.72712
0.024	5.89261	5.89504	5.87692	5.87285	5.83233	5.84187	5.79128	5.79404	5.76593	5.75972	5.73629	5.7267
0.025	5.88234	5.89502	5.8738	5.87278	5.85358	5.84172	5.79568	5.7938	5.76791	5.75941	5.74124	5.72627
0.026	5.89833	5.895	5.87468	5.87271	5.8417	5.84156	5.80089	5.79357	5.76071	5.75911	5.73816	5.72585
0.027	5.88483	5.89498	5.8676	5.87264	5.85549	5.8414	5.79508	5.79334	5.76243	5.7588	5.74836	5.72543
0.028	5.88964	5.89496	5.86423	5.87256	5.84011	5.84125	5.8084	5.7931	5.76521	5.7585	5.73042	5.72502
0.029	5.89378	5.89494	5.87895	5.87249	5.85747	5.84109	5.80314	5.79287	5.75639	5.7582	5.72755	5.7246
0.03	5.8876	5.89492	5.86662	5.87242	5.85321	5.84093	5.80891	5.79264	5.75809	5.7579	5.73219	5.72419
0.031	5.89534	5.8949	5.88302	5.87235	5.84097	5.84078	5.79391	5.79241	5.76377	5.7576	5.72555	5.72378
0.032	5.87666	5.89488	5.8825	5.87228	5.8339	5.84062	5.80173	5.79218	5.76658	5.7573	5.7258	5.72337
0.033	5.89282	5.89486	5.87736	5.87221	5.8384	5.84047	5.79981	5.79195	5.77495	5.757	5.72089	5.72296
0.034	5.90333	5.89484	5.88687	5.87213	5.84873	5.84031	5.79603	5.79172	5.76284	5.7567	5.72691	5.72256
0.035	5.89298	5.89482	5.8716	5.87206	5.83476	5.84016	5.79659	5.79149	5.76576	5.75641	5.73051	5.72216
0.036	5.89228	5.8948	5.88489	5.87199	5.8432	5.84	5.79883	5.79126	5.76195	5.75611	5.72804	5.72176
0.037	5.87457	5.89478	5.87763	5.87192	5.84881	5.83985	5.80964	5.79104	5.75558	5.75582	5.74135	5.72136
0.038	5.89614	5.89476	5.87339	5.87185	5.84243	5.83969	5.78903	5.79081	5.7622	5.75552	5.72165	5.72096
0.039	5.889	5.89474	5.87281	5.87178	5.8474	5.83954	5.79503	5.79058	5.75756	5.75523	5.71142	5.72057
0.04	5.89305	5.89472	5.88002	5.87171	5.83365	5.83939	5.80179	5.79036	5.76179	5.75494	5.72923	5.72017
0.041	5.88932	5.8947	5.87115	5.87164	5.84556	5.83923	5.78508	5.79013	5.75627	5.75465	5.72868	5.71978
0.042	5.89952	5.89468	5.86687	5.87156	5.84517	5.83908	5.78698	5.78991	5.74675	5.75436	5.72028	5.71939
0.043	5.89357	5.89466	5.88358	5.87149	5.84514	5.83893	5.80355	5.78968	5.75771	5.75407	5.71395	5.71901
0.044	5.87701	5.89464	5.88933	5.87142	5.83764	5.83877	5.78682	5.78946	5.76046	5.75379	5.72753	5.71862
0.045	5.90072	5.89462	5.86968	5.87135	5.85111	5.83862	5.79866	5.78924	5.75877	5.7535	5.72275	5.71824
0.046	5.90421	5.8946	5.88631	5.87128	5.85799	5.83847	5.81022	5.78901	5.75076	5.75322	5.7244	5.71786
0.047	5.89815	5.89458	5.87827	5.87121	5.84726	5.83832	5.79388	5.78879	5.7531	5.75293	5.72994	5.71748
0.048	5.88042	5.89456	5.86977	5.87114	5.84411	5.83817	5.78734	5.78857	5.75581	5.75265	5.71848	5.7171
0.049	5.89319	5.89454	5.86195	5.87107	5.84536	5.83801	5.80816	5.78835	5.74997	5.75237	5.73862	5.71672
0.05	5.89187	5.89452	5.87317	5.871	5.8496	5.83786	5.79148	5.78813	5.76352	5.75208	5.71994	5.71635
0.051	5.8858	5.8945	5.88345	5.87093	5.83623	5.83771	5.77186	5.78791	5.75945	5.7518	5.72039	5.71598
0.052	5.89401	5.89448	5.88528	5.87086	5.84611	5.83756	5.78764	5.78769	5.75856	5.75152	5.72661	5.71561
0.053	5.89786	5.89446	5.85932	5.87079	5.84103	5.83741	5.78562	5.78747	5.75028	5.75125	5.71852	5.71524
0.054	5.88099	5.89444	5.87893	5.87072	5.83756	5.83726	5.78517	5.78725	5.76627	5.75097	5.71645	5.71487
0.055	5.88183	5.89442	5.87183	5.87065	5.84139	5.83711	5.78769	5.78703	5.74196	5.75069	5.71089	5.71451
0.056	5.90233	5.8944	5.88206	5.87058	5.84987	5.83696	5.78161	5.78682	5.7591	5.75042	5.71955	5.71414
0.057	5.88733	5.89438	5.85433	5.87051	5.84767	5.83681	5.77835	5.7866	5.75333	5.75014	5.71812	5.71378
0.058	5.90566	5.89436	5.87503	5.87044	5.83923	5.83666	5.79653	5.78639	5.75819	5.74987	5.72624	5.71342
0.059	5.87577	5.89434	5.87968	5.87037	5.85516	5.83651	5.79259	5.78617	5.75923	5.74959	5.71671	5.71306
0.06	5.89688	5.89432	5.88771	5.8703	5.84636	5.83636	5.78477	5.78595	5.74895	5.74932	5.72206	5.71271
0.061	5.89637	5.8943	5.85608	5.87023	5.84213	5.83622	5.80487	5.78574	5.7487	5.74905	5.71642	5.71235
0.062	5.90361	5.89428	5.8562	5.87016	5.84138	5.83607	5.78809	5.78553	5.74771	5.74878	5.71604	5.712
0.063	5.89128	5.89427	5.86909	5.87009	5.84644	5.83592	5.79643	5.78531	5.74333	5.74851	5.71448	5.71165
0.064	5.90854	5.89425	5.872	5.87002	5.8605	5.83577	5.80033	5.7851	5.75426	5.74824	5.71365	5.7113
0.065	5.88922	5.89423	5.8781	5.86995	5.83374	5.83562	5.77856	5.78489	5.76436	5.74797	5.7176	5.71095
0.066	5.89963	5.89421	5.88328	5.86988	5.84921	5.83548	5.78863	5.78468	5.74305	5.74771	5.71195	5.71061
0.067	5.89779	5.89419	5.86879	5.86981	5.83923	5.83533	5.78756	5.78447	5.7614	5.74744	5.72272	5.71026
0.068	5.90631	5.89417	5.85822	5.86974	5.85408	5.83518	5.77869	5.78426	5.74129	5.74718	5.73091	5.70992
0.069	5.89017	5.89415	5.88074	5.86967	5.82374	5.83504	5.79304	5.78405	5.74082	5.74691	5.71735	5.70958
0.07	5.90849	5.89413	5.8666	5.8696	5.84303	5.83489	5.77977	5.78384	5.74636	5.74665	5.71431	5.70924
0.071	5.9031	5.89411	5.88355	5.86953	5.84294	5.83474	5.79416	5.78363	5.76231	5.74639	5.71108	5.7089
0.072	5.89601	5.89409	5.86236	5.86946	5.82771	5.8346	5.80231	5.78342	5.75985	5.74612	5.71497	5.70857
0.073	5.90487	5.89407	5.87379	5.86939	5.84293	5.83445	5.79649	5.78321	5.75332	5.74586	5.72113	5.70823
0.074	5.90242	5.89405	5.87119	5.86933	5.83561	5.83431	5.76391	5.783	5.74494	5.7456	5.70823	5.7079
0.075	5.90245	5.89403	5.87189	5.86926	5.83532	5.83416	5.77878	5.7828	5.73629	5.74535	5.71284	5.70757
0.076	5.89626	5.89401	5.8782	5.86919	5.83154	5.83402	5.77104	5.78259	5.74402	5.74509	5.70934	5.70724
0.077	5.90535	5.89399	5.87472	5.86912	5.83962	5.83387	5.78837	5.78238	5.74221	5.74483	5.70691	5.70691
0.078	5.89708	5.89397	5.87712	5.86905	5.83533	5.83373	5.77939	5.78218	5.74506	5.74457	5.71657	5.70659
0.079	5.90854	5.89395	5.86189	5.86898	5.84246	5.83358	5.78215	5.78197	5.75074	5.74432	5.7162	5.70626
0.08	5.89562	5.89393	5.86142	5.86891	5.8347	5.83344	5.77702	5.78177	5.7482	5.74406	5.71579	5.70594
0.081	5.89538	5.89391	5.88103	5.86884	5.84742	5.83329	5.77976	5.78156	5.74978	5.74381	5.69534	5.70562
0.082	5.90329	5.89389	5.87163	5.86878	5.84597	5.83315	5.79241	5.78136	5.74818	5.74356	5.70685	5.7053
0.083	5.89198	5.89387	5.87327	5.86871	5.83708	5.83301	5.76851	5.78116	5.73455	5.7433	5.70469	5.70498
0.084	5.90844	5.89386	5.85667	5.86864	5.83435	5.83286	5.77547	5.78096	5.74563	5.74305	5.7017	5.70466
0.085	5.90373	5.89384	5.88256	5.86857	5.83908	5.83272	5.78139	5.78075	5.74918	5.7428	5.71451	5.70434
0.086	5.90148	5.89382	5.88344	5.8685	5.83439	5.83258	5.79215	5.78055	5.74706	5.74255	5.696	5.70403
0.087	5.90131	5.8938	5.87931	5.86843	5.83305	5.83244	5.7823	5.78035	5.7448	5.7423	5.70718	5.70372
0.088	5.88295	5.89378	5.88218	5.86837	5.82927	5.83229	5.78211	5.78015	5.74663	5.74206	5.70488	5.70341
0.089	5.88275	5.89376	5.86422	5.8683	5.82927	5.83215	5.77453	5.77995	5.73539	5.74181	5.70699	5.7031
0.09	5.88333	5.89374	5.87169	5.86823	5.8301	5.83201	5.77487	5.77975	5.74763	5.74156	5.70092	5.70279
0.091	5.88896	5.89372	5.86866	5.86816	5.83926	5.83187	5.77746	5.77955	5.74556	5.74132	5.70548	5.70248
0.092	5.90258	5.8937	5.87468	5.86809	5.83495	5.83173	5.78214	5.77935	5.73352	5.74107	5.6922	5.70218
0.093	5.89936	5.89368	5.87934	5.86803	5.84141	5.83159	5.77412	5.77916	5.73741	5.74083	5.70396	5.70188
0.094	5.89665	5.89366	5.86436	5.86796	5.83786	5.83144	5.76457	5.77896	5.74269	5.74059	5.69755	5.70157
0.095	5.88613	5.89364	5.87623	5.86789	5.84214	5.8313	5.79913	5.77876	5.74842	5.74034	5.7084	5.70127
0.096	5.89838	5.89362	5.87708	5.86782	5.83385	5.83116	5.77737	5.77857	5.74459	5.7401	5.69758	5.70097
0.097	5.89054	5.8936	5.86001	5.86776	5.83101	5.83102	5.78273	5.77837	5.73683	5.73986	5.70147	5.70068
0.098	5.88939	5.89358	5.87398	5.86769	5.8509	5.83088	5.78078	5.77817	5.74187	5.73962	5.69556	5.70038
0.099	5.90274	5.89357	5.87645	5.86762	5.8263	5.83074	5.77106	5.77798	5.73778	5.73938	5.69735	5.70009
0.1	5.8972	5.89355	5.86963	5.86755	5.82794	5.8306	5.75821	5.77778	5.74613	5.73914	5.70346	5.69979
0.101	5.8909	5.89353	5.86759	5.86749	5.8297	5.83046	5.77019	5.77759	5.73733	5.73891	5.68959	5.6995
0.102	5.89956	5.89351	5.87883	5.86742	5.83438	5.83033	5.79275	5.7774	5.73417	5.73867	5.70249	5.69921
0.103	5.8992	5.89349	5.86911	5.86735	5.82743	5.83019	5.78472	5.7772	5.74659	5.73843	5.69941	5.69892
0.104	5.88289	5.89347	5.86367	5.86728	5.83211	5.83005	5.78154	5.77701	5.74488	5.7382	5.70098	5.69863
0.105	5.89042	5.89345	5.86858	5.86722	5.8302	5.82991	5.76205	5.77682	5.73804	5.73796	5.68978	5.69835
0.106	5.90096	5.89343	5.86265	5.86715	5.83214	5.82977	5.78647	5.77663	5.75098	5.73773	5.69464	5.69806
0.107	5.89809	5.89341	5.86865	5.86708	5.83166	5.82963	5.7682	5.77644	5.73488	5.7375	5.69708	5.69778
0.108	5.89593	5.89339	5.88839	5.86702	5.83728	5.8295	5.76498	5.77625	5.74595	5.73727	5.70385	5.6975
0.109	5.90504	5.89337	5.85996	5.86695	5.82867	5.82936	5.7689	5.77606	5.73501	5.73703	5.69549	5.69722
0.11	5.89394	5.89335	5.86472	5.86688	5.83823	5.82922	5.78323	5.77587	5.73808	5.7368	5.70004	5.69694
0.111	5.88656	5.89334	5.86325	5.86682	5.83342	5.82908	5.7993	5.77568	5.74588	5.73657	5.69489	5.69666
0.112	5.89078	5.89332	5.87145	5.86675	5.82929	5.82895	5.78724	5.77549	5.73813	5.73635	5.68756	5.69638
0.113	5.88813	5.8933	5.85913	5.86668	5.82029	5.82881	5.7737	5.7753	5.73546	5.73612	5.69702	5.69611
0.114	5.87838	5.89328	5.88002	5.86662	5.82535	5.82867	5.7583	5.77511	5.7469	5.73589	5.68466	5.69583
0.115	5.89363	5.89326	5.86495	5.86655	5.83619	5.82854	5.75683	5.77492	5.73829	5.73566	5.68992	5.69556
0.116	5.89679	5.89324	5.86418	5.86648	5.83418	5.8284	5.79965	5.77474	5.74492	5.73544	5.69498	5.69529
0.117	5.90095	5.89322	5.87484	5.86642	5.8321	5.82827	5.77786	5.77455	5.7359	5.73521	5.7037	5.69502
0.118	5.88947	5.8932	5.86415	5.86635	5.83514	5.82813	5.79637	5.77436	5.73518	5.73499	5.70053	5.69475
0.119	5.88819	5.89318	5.86649	5.86628	5.82991	5.82799	5.79166	5.77418	5.72905	5.73476	5.69299	5.69448
0.12	5.90008	5.89316	5.86716	5.86622	5.83098	5.82786	5.77555	5.77399	5.73848	5.73454	5.68704	5.69422
0.121	5.89293	5.89315	5.86576	5.86615	5.83225	5.82772	5.75805	5.77381	5.74706	5.73432	5.69916	5.69395
0.122	5.89319	5.89313	5.85443	5.86609	5.8317	5.82759	5.7649	5.77363	5.74727	5.7341	5.6907	5.69369
0.123	5.91112	5.89311	5.86501	5.86602	5.82005	5.82746	5.77481	5.77344	5.7346	5.73388	5.69223	5.69342
0.124	5.8967	5.89309	5.85895	5.86595	5.83919	5.82732	5.75958	5.77326	5.73548	5.73366	5.69677	5.69316
0.125	5.89346	5.89307	5.86972	5.86589	5.8207	5.82719	5.77319	5.77308	5.73481	5.73344	5.69453	5.6929
0.126	5.88478	5.89305	5.8651	5.86582	5.83429	5.82705	5.77513	5.77289	5.73114	5.73322	5.68593	5.69265
0.127	5.89007	5.89303	5.86748	5.86576	5.83403	5.82692	5.76703	5.77271	5.72697	5.733	5.69039	5.69239
0.128	5.90024	5.89301	5.86112	5.86569	5.83569	5.82679	5.76605	5.77253	5.73231	5.73278	5.69708	5.69213
0.129	5.89732	5.89299	5.86389	5.86562	5.8203	5.82665	5.7966	5.77235	5.74375	5.73257	5.69274	5.69188
0.13	5.89056	5.89297	5.86362	5.86556	5.82593	5.82652	5.76553	5.77217	5.73884	5.73235	5.67836	5.69162
0.131	5.90254	5.89296	5.8799	5.86549	5.82533	5.82639	5.75783	5.77199	5.74048	5.73213	5.68304	5.69137
0.132	5.89145	5.89294	5.85356	5.86543	5.82414	5.82625	5.76588	5.77181	5.72535	5.73192	5.68494	5.69112
0.133	5.8869	5.89292	5.8751	5.86536	5.82843	5.82612	5.77009	5.77163	5.73066	5.73171	5.7042	5.69087
0.134	5.89588	5.8929	5.86331	5.8653	5.82447	5.82599	5.77495	5.77145	5.73376	5.73149	5.68368	5.69062
0.135	5.8777	5.89288	5.88152	5.86523	5.83034	5.82586	5.76324	5.77127	5.73565	5.73128	5.69248	5.69037
0.136	5.90041	5.89286	5.85924	5.86517	5.82742	5.82573	5.77301	5.77109	5.73909	5.73107	5.69337	5.69013
0.137	5.88959	5.89284	5.87334	5.8651	5.8297	5.82559	5.76626	5.77092	5.73183	5.73086	5.69111	5.68988
0.138	5.88917	5.89282	5.86541	5.86504	5.82556	5.82546	5.79135	5.77074	5.72991	5.73065	5.68656	5.68964
0.139	5.90775	5.89281	5.85969	5.86497	5.82782	5.82533	5.78309	5.77056	5.73257	5.73044	5.69208	5.68939
0.14	5.89114	5.89279	5.87313	5.86491	5.82796	5.8252	5.7914	5.77039	5.71999	5.73023	5.67855	5.68915
0.141	5.88932	5.89277	5.8735	5.86484	5.81372	5.82507	5.7781	5.77021	5.72699	5.73002	5.68135	5.68891
0.142	5.90747	5.89275	5.86995	5.86478	5.82515	5.82494	5.76478	5.77004	5.72612	5.72981	5.6884	5.68867
0.143	5.89013	5.89273	5.85747	5.86471	5.81076	5.82481	5.77809	5.76986	5.72385	5.72961	5.69328	5.68843
0.144	5.88929	5.89271	5.86905	5.86465	5.82299	5.82468	5.78247	5.76969	5.72501	5.7294	5.68773	5.68819
0.145	5.90085	5.89269	5.87576	5.86458	5.82075	5.82455	5.74654	5.76951	5.7253	5.7292	5.68651	5.68796
0.146	5.89384	5.89267	5.86451	5.86452	5.81134	5.82442	5.76393	5.76934	5.73032	5.72899	5.68421	5.68772
0.147	5.89829	5.89265	5.85675	5.86445	5.82665	5.82429	5.77035	5.76917	5.73208	5.72879	5.69542	5.68749
0.148	5.88164	5.89264	5.86504	5.86439	5.82875	5.82416	5.77366	5.76899	5.73383	5.72858	5.6823	5.68726
0.149	5.88871	5.89262	5.87165	5.86432	5.82361	5.82403	5.76961	5.76882	5.71738	5.72838	5.69761	5.68703
0.15	5.89575	5.8926	5.8606	5.86426	5.82909	5.8239	5.75999	5.76865	5.72349	5.72818	5.68668	5.68679
0.151	5.89464	5.89258	5.85377	5.86419	5.82232	5.82378	5.76362	5.76848	5.72568	5.72798	5.6861	5.68657
0.152	5.90412	5.89256	5.8687	5.86413	5.82644	5.82365	5.77787	5.76831	5.73237	5.72778	5.68786	5.68634
0.153	5.89935	5.89254	5.86977	5.86406	5.83606	5.82352	5.76134	5.76814	5.7258	5.72758	5.685	5.68611
0.154	5.89654	5.89252	5.87827	5.864	5.83006	5.82339	5.75496	5.76797	5.72558	5.72738	5.69237	5.68588
0.155	5.89011	5.89251	5.84993	5.86394	5.81532	5.82326	5.78473	5.7678	5.73174	5.72718	5.67153	5.68566
0.156	5.89201	5.89249	5.85609	5.86387	5.82538	5.82314	5.76689	5.76763	5.72817	5.72698	5.68602	5.68543
0.157	5.89565	5.89247	5.87986	5.86381	5.8256	5.82301	5.77356	5.76746	5.72123	5.72678	5.67275	5.68521
0.158	5.88255	5.89245	5.85744	5.86374	5.81099	5.82288	5.76088	5.76729	5.72218	5.72659	5.68187	5.68499
0.159	5.90304	5.89243	5.86387	5.86368	5.82924	5.82275	5.77133	5.76712	5.72125	5.72639	5.68178	5.68477
0.16	5.88949	5.89241	5.86356	5.86362	5.82549	5.82263	5.75793	5.76695	5.73159	5.72619	5.67765	5.68455
0.161	5.89968	5.89239	5.86327	5.86355	5.83606	5.8225	5.75928	5.76679	5.72857	5.726	5.67846	5.68433
0.162	5.88911	5.89238	5.87714	5.86349	5.81165	5.82237	5.77463	5.76662	5.7176	5.7258	5.67556	5.68411
0.163	5.89613	5.89236	5.86293	5.86342	5.82615	5.82225	5.76684	5.76645	5.73392	5.72561	5.69021	5.6839
0.164	5.89748	5.89234	5.85662	5.86336	5.82283	5.82212	5.77025	5.76629	5.72608	5.72542	5.68706	5.68368
0.165	5.88437	5.89232	5.86115	5.8633	5.82711	5.822	5.76935	5.76612	5.72787	5.72523	5.6773	5.68346
0.166	5.90256	5.8923	5.8737	5.86323	5.82086	5.82187	5.75191	5.76596	5.71806	5.72503	5.69482	5.68325
0.167	5.89268	5.89228	5.87682	5.86317	5.8069	5.82175	5.75027	5.76579	5.72638	5.72484	5.67433	5.68304
0.168	5.8871	5.89226	5.86633	5.86311	5.80532	5.82162	5.75578	5.76563	5.72253	5.72465	5.68478	5.68283
0.169	5.90381	5.89225	5.86373	5.86304	5.82467	5.8215	5.74726	5.76546	5.73453	5.72446	5.67072	5.68262
0.17	5.89316	5.89223	5.87241	5.86298	5.82346	5.82137	5.77463	5.7653	5.72406	5.72427	5.68454	5.68241
0.171	5.90435	5.89221	5.86657	5.86292	5.82151	5.82125	5.74926	5.76514	5.71506	5.72408	5.67622	5.6822
0.172	5.91077	5.89219	5.85921	5.86285	5.82866	5.82112	5.76232	5.76497	5.71557	5.7239	5.6696	5.68199
0.173	5.88272	5.89217	5.87163	5.86279	5.81671	5.821	5.7809	5.76481	5.73387	5.72371	5.68826	5.68178
0.174	5.89832	5.89215	5.86982	5.86273	5.82926	5.82087	5.7398	5.76465	5.7218	5.72352	5.67708	5.68158
0.175	5.88234	5.89214	5.85144	5.86266	5.82691	5.82075	5.76883	5.76449	5.72044	5.72333	5.68368	5.68137
0.176	5.88925	5.89212	5.86699	5.8626	5.81041	5.82063	5.75736	5.76433	5.72409	5.72315	5.67302	5.68117
0.177	5.90323	5.8921	5.87795	5.86254	5.82235	5.8205	5.769	5.76417	5.72502	5.72296	5.67438	5.68097
0.178	5.89146	5.89208	5.85386	5.86248	5.82698	5.82038	5.76921	5.76401	5.719	5.72278	5.6778	5.68076
0.179	5.9093	5.89206	5.86605	5.86241	5.82189	5.82026	5.76153	5.76384	5.72117	5.7226	5.67824	5.68056
0.18	5.89156	5.89204	5.8573	5.86235	5.81541	5.82013	5.75334	5.76369	5.71747	5.72241	5.67689	5.68036
0.181	5.9067	5.89202	5.85325	5.86229	5.81268	5.82001	5.75304	5.76353	5.71849	5.72223	5.68581	5.68016
0.182	5.89222	5.89201	5.86383	5.86222	5.81557	5.81989	5.74374	5.76337	5.72558	5.72205	5.68093	5.67997
0.183	5.89272	5.89199	5.85734	5.86216	5.81787	5.81977	5.74487	5.76321	5.73606	5.72187	5.68487	5.67977
0.184	5.89031	5.89197	5.86523	5.8621	5.82422	5.81964	5.76624	5.76305	5.72811	5.72168	5.67377	5.67957
0.185	5.89085	5.89195	5.86509	5.86204	5.82036	5.81952	5.76205	5.76289	5.71618	5.7215	5.68342	5.67938
0.186	5.88117	5.89193	5.8671	5.86197	5.82296	5.8194	5.7437	5.76274	5.72174	5.72132	5.68078	5.67918
0.187	5.89646	5.89192	5.86716	5.86191	5.8329	5.81928	5.75896	5.76258	5.71341	5.72115	5.6819	5.67899
0.188	5.88891	5.8919	5.8474	5.86185	5.81918	5.81916	5.7559	5.76242	5.71935	5.72097	5.67507	5.6788
0.189	5.90278	5.89188	5.85939	5.86179	5.81445	5.81904	5.76838	5.76227	5.72821	5.72079	5.67739	5.67861
0.19	5.89296	5.89186	5.86555	5.86173	5.81935	5.81892	5.74765	5.76211	5.71301	5.72061	5.68007	5.67842
0.191	5.88837	5.89184	5.86197	5.86166	5.82206	5.8188	5.76269	5.76196	5.70963	5.72043	5.67686	5.67823
0.192	5.88898	5.89182	5.85494	5.8616	5.81981	5.81867	5.72822	5.7618	5.71355	5.72026	5.67715	5.67804
0.193	5.891	5.89181	5.84784	5.86154	5.82274	5.81855	5.75112	5.76165	5.72449	5.72008	5.68314	5.67785
0.194	5.88547	5.89179	5.87103	5.86148	5.81126	5.81843	5.7626	5.76149	5.72476	5.71991	5.67447	5.67766
0.195	5.88133	5.89177	5.86188	5.86141	5.81638	5.81831	5.74274	5.76134	5.71781	5.71973	5.68653	5.67748
0.196	5.89322	5.89175	5.86147	5.86135	5.82309	5.81819	5.76019	5.76118	5.71856	5.71956	5.67048	5.67729
0.197	5.89531	5.89173	5.87628	5.86129	5.81781	5.81807	5.75125	5.76103	5.72282	5.71939	5.67486	5.67711
0.198	5.88693	5.89172	5.85953	5.86123	5.80991	5.81796	5.77782	5.76088	5.72775	5.71921	5.6799	5.67692
0.199	5.89699	5.8917	5.86203	5.86117	5.79844	5.81784	5.78886	5.76073	5.72673	5.71904	5.68215	5.67674
0.2	5.89907	5.89168	5.86683	5.86111	5.80865	5.81772	5.77811	5.76057	5.70903	5.71887	5.66321	5.67656
0.201	5.89522	5.89166	5.84951	5.86104	5.82022	5.8176	5.76373	5.76042	5.70385	5.7187	5.67355	5.67638
0.202	5.89936	5.89164	5.86784	5.86098	5.81887	5.81748	5.76573	5.76027	5.70279	5.71853	5.67079	5.6762
0.203	5.90844	5.89162	5.85341	5.86092	5.82324	5.81736	5.77168	5.76012	5.71567	5.71836	5.67596	5.67602
0.204	5.89303	5.89161	5.86785	5.86086	5.82261	5.81724	5.7531	5.75997	5.71206	5.71819	5.67655	5.67584
0.205	5.88674	5.89159	5.87351	5.8608	5.82561	5.81713	5.76203	5.75982	5.715	5.71802	5.66749	5.67566
0.206	5.89357	5.89157	5.86796	5.86074	5.82611	5.81701	5.76817	5.75967	5.72002	5.71785	5.66456	5.67548
0.207	5.89025	5.89155	5.86177	5.86068	5.83241	5.81689	5.77136	5.75952	5.71906	5.71768	5.67996	5.67531
0.208	5.90846	5.89153	5.85938	5.86061	5.81285	5.81677	5.74792	5.75937	5.72107	5.71751	5.67098	5.67513
0.209	5.89623	5.89152	5.85284	5.86055	5.81154	5.81666	5.76248	5.75922	5.7203	5.71735	5.66669	5.67496
0.21	5.89065	5.8915	5.87509	5.86049	5.81556	5.81654	5.75929	5.75907	5.72719	5.71718	5.68282	5.67478
0.211	5.89732	5.89148	5.85959	5.86043	5.81335	5.81642	5.74822	5.75893	5.715	5.71701	5.68188	5.67461
0.212	5.89822	5.89146	5.86528	5.86037	5.81288	5.8163	5.75292	5.75878	5.71807	5.71685	5.6714	5.67444
0.213	5.89462	5.89144	5.8595	5.86031	5.81282	5.81619	5.76286	5.75863	5.71839	5.71668	5.68354	5.67427
0.214	5.90121	5.89143	5.84524	5.86025	5.82502	5.81607	5.7455	5.75848	5.71278	5.71652	5.68728	5.6741
0.215	5.9048	5.89141	5.86996	5.86019	5.81446	5.81596	5.7593	5.75834	5.71841	5.71636	5.66315	5.67393
0.216	5.88941	5.89139	5.86137	5.86013	5.82242	5.81584	5.7597	5.75819	5.71192	5.71619	5.66735	5.67376
0.217	5.90174	5.89137	5.86813	5.86007	5.80599	5.81572	5.7513	5.75805	5.71326	5.71603	5.66275	5.67359
0.218	5.89544	5.89135	5.86417	5.86001	5.82434	5.81561	5.753	5.7579	5.70272	5.71587	5.67045	5.67342
0.219	5.90461	5.89134	5.85518	5.85994	5.80799	5.81549	5.7496	5.75776	5.71868	5.71571	5.67179	5.67326
0.22	5.89443	5.89132	5.86399	5.85988	5.81773	5.81538	5.74596	5.75761	5.70209	5.71555	5.67382	5.67309
0.221	5.88556	5.8913	5.87187	5.85982	5.83201	5.81526	5.75274	5.75747	5.70904	5.71539	5.67542	5.67293
0.222	5.88855	5.89128	5.86659	5.85976	5.80861	5.81515	5.75076	5.75732	5.71612	5.71522	5.67039	5.67276
0.223	5.89927	5.89126	5.86357	5.8597	5.80862	5.81503	5.76666	5.75718	5.70643	5.71507	5.66585	5.6726
0.224	5.89774	5.89125	5.87282	5.85964	5.82092	5.81492	5.76186	5.75704	5.70897	5.71491	5.66379	5.67244
0.225	5.89834	5.89123	5.84715	5.85958	5.80949	5.8148	5.75067	5.75689	5.71998	5.71475	5.67602	5.67227
0.226	5.90069	5.89121	5.84658	5.85952	5.80806	5.81469	5.76898	5.75675	5.71978	5.71459	5.67731	5.67211
0.227	5.88762	5.89119	5.86398	5.85946	5.81328	5.81458	5.74656	5.75661	5.71235	5.71443	5.67163	5.67195
0.228	5.89085	5.89117	5.86279	5.8594	5.81961	5.81446	5.76348	5.75647	5.713	5.71428	5.67283	5.67179
0.229	5.87646	5.89116	5.84726	5.85934	5.80936	5.81435	5.75139	5.75632	5.71212	5.71412	5.67417	5.67163
0.23	5.89277	5.89114	5.85314	5.85928	5.81688	5.81423	5.73742	5.75618	5.71241	5.71396	5.67041	5.67148
0.231	5.89022	5.89112	5.86152	5.85922	5.81166	5.81412	5.75657	5.75604	5.71875	5.71381	5.67007	5.67132
0.232	5.9096	5.8911	5.84637	5.85916	5.81799	5.81401	5.72944	5.7559	5.71201	5.71365	5.66388	5.67116
0.233	5.89113	5.89109	5.8578	5.8591	5.81694	5.8139	5.74792	5.75576	5.72489	5.7135	5.67244	5.67101
0.234	5.88506	5.89107	5.85004	5.85904	5.82592	5.81378	5.7624	5.75562	5.704	5.71334	5.68853	5.67085
0.235	5.88741	5.89105	5.86174	5.85898	5.81631	5.81367	5.76978	5.75548	5.70382	5.71319	5.66669	5.6707
0.236	5.90424	5.89103	5.86562	5.85892	5.81392	5.81356	5.77279	5.75534	5.70683	5.71304	5.67028	5.67054
0.237	5.89018	5.89101	5.86922	5.85886	5.80962	5.81345	5.7448	5.7552	5.71544	5.71288	5.6837	5.67039
0.238	5.90058	5.891	5.85242	5.8588	5.81188	5.81333	5.76295	5.75507	5.72253	5.71273	5.67351	5.67024
0.239	5.88631	5.89098	5.86109	5.85874	5.82448	5.81322	5.7534	5.75493	5.71257	5.71258	5.67231	5.67008
0.24	5.88353	5.89096	5.86329	5.85868	5.81531	5.81311	5.74091	5.75479	5.71313	5.71243	5.66047	5.66993
0.241	5.88433	5.89094	5.8583	5.85862	5.80798	5.813	5.74791	5.75465	5.71582	5.71228	5.67272	5.66978
0.242	5.89662	5.89093	5.86399	5.85856	5.81053	5.81289	5.76102	5.75452	5.70712	5.71213	5.66623	5.66963
0.243	5.89023	5.89091	5.86248	5.85851	5.82297	5.81278	5.76796	5.75438	5.7054	5.71198	5.66572	5.66948
0.244	5.8965	5.89089	5.86227	5.85845	5.81387	5.81266	5.76996	5.75424	5.72152	5.71183	5.66543	5.66934
0.245	5.89857	5.89087	5.85789	5.85839	5.80793	5.81255	5.77342	5.75411	5.71688	5.71168	5.68009	5.66919
0.246	5.89524	5.89086	5.86851	5.85833	5.80536	5.81244	5.75303	5.75397	5.70904	5.71153	5.66442	5.66904
0.247	5.88519	5.89084	5.85724	5.85827	5.80494	5.81233	5.74746	5.75383	5.7147	5.71139	5.66038	5.6689
0.248	5.89867	5.89082	5.84173	5.85821	5.81397	5.81222	5.759	5.7537	5.70716	5.71124	5.66518	5.66875
0.249	5.89345	5.8908	5.86256	5.85815	5.81434	5.81211	5.75596	5.75356	5.71604	5.71109	5.66968	5.66861
0.25	5.89535	5.89078	5.84568	5.85809	5.81291	5.812	5.74648	5.75343	5.70617	5.71094	5.6668	5.66846
0.251	5.88668	5.89077	5.84483	5.85803	5.81285	5.81189	5.75505	5.7533	5.71419	5.7108	5.66866	5.66832
0.252	5.91567	5.89075	5.8607	5.85797	5.82571	5.81178	5.74309	5.75316	5.71148	5.71065	5.64973	5.66817
0.253	5.89821	5.89073	5.85173	5.85791	5.81914	5.81167	5.76485	5.75303	5.7064	5.71051	5.6618	5.66803
0.254	5.89102	5.89071	5.85069	5.85786	5.812	5.81156	5.7501	5.7529	5.71533	5.71036	5.66976	5.66789
0.255	5.8969	5.8907	5.85387	5.8578	5.8157	5.81146	5.74537	5.75276	5.70521	5.71022	5.64775	5.66775
0.256	5.8939	5.89068	5.85898	5.85774	5.81152	5.81135	5.75105	5.75263	5.71375	5.71008	5.66297	5.66761
0.257	5.89863	5.89066	5.84568	5.85768	5.81196	5.81124	5.74659	5.7525	5.7098	5.70993	5.66865	5.66747
0.258	5.90313	5.89064	5.84587	5.85762	5.81215	5.81113	5.75414	5.75237	5.70892	5.70979	5.67181	5.66733
0.259	5.8884	5.89063	5.8508	5.85756	5.81998	5.81102	5.74196	5.75223	5.70098	5.70965	5.67267	5.66719
0.26	5.89403	5.89061	5.85585	5.8575	5.80806	5.81091	5.76188	5.7521	5.70095	5.70951	5.66721	5.66705
0.261	5.90296	5.89059	5.85538	5.85745	5.81509	5.8108	5.7417	5.75197	5.70764	5.70937	5.65223	5.66692
0.262	5.89728	5.89057	5.84831	5.85739	5.80653	5.8107	5.75844	5.75184	5.71966	5.70922	5.66417	5.66678
0.263	5.88891	5.89056	5.84984	5.85733	5.80879	5.81059	5.75188	5.75171	5.71605	5.70908	5.66754	5.66665
0.264	5.89682	5.89054	5.87004	5.85727	5.80807	5.81048	5.74048	5.75158	5.70475	5.70894	5.66422	5.66651
0.265	5.90444	5.89052	5.84983	5.85721	5.80866	5.81037	5.72811	5.75145	5.71238	5.7088	5.6631	5.66638
0.266	5.87894	5.8905	5.85077	5.85715	5.81459	5.81027	5.73241	5.75132	5.71394	5.70867	5.67122	5.66624
0.267	5.89119	5.89049	5.85131	5.8571	5.81096	5.81016	5.73899	5.75119	5.71029	5.70853	5.66539	5.66611
0.268	5.89711	5.89047	5.86018	5.85704	5.80073	5.81005	5.73926	5.75106	5.70598	5.70839	5.67044	5.66598
0.269	5.88262	5.89045	5.86703	5.85698	5.80676	5.80995	5.73561	5.75094	5.70545	5.70825	5.66177	5.66584
0.27	5.88999	5.89043	5.86408	5.85692	5.81747	5.80984	5.74291	5.75081	5.71274	5.70811	5.65307	5.66571
0.271	5.8932	5.89042	5.86573	5.85686	5.79804	5.80973	5.75076	5.75068	5.70456	5.70798	5.64765	5.66558
0.272	5.89091	5.8904	5.84472	5.85681	5.80278	5.80963	5.74975	5.75055	5.72048	5.70784	5.66187	5.66545
0.273	5.90218	5.89038	5.8422	5.85675	5.81593	5.80952	5.74907	5.75042	5.70549	5.7077	5.65431	5.66532
0.274	5.88175	5.89036	5.86304	5.85669	5.80662	5.80942	5.74092	5.7503	5.71281	5.70757	5.65871	5.66519
0.275	5.88653	5.89035	5.85151	5.85663	5.80863	5.80931	5.76654	5.75017	5.70537	5.70743	5.66723	5.66506
0.276	5.89837	5.89033	5.85085	5.85658	5.8112	5.8092	5.73858	5.75004	5.71509	5.7073	5.66686	5.66493
0.277	5.89735	5.89031	5.86356	5.85652	5.81131	5.8091	5.7566	5.74992	5.70737	5.70716	5.6607	5.66481
0.278	5.89589	5.8903	5.85366	5.85646	5.8076	5.80899	5.73513	5.74979	5.70382	5.70703	5.66471	5.66468
0.279	5.89307	5.89028	5.84944	5.8564	5.81012	5.80889	5.74089	5.74967	5.7115	5.7069	5.66866	5.66455
0.28	5.88357	5.89026	5.84936	5.85634	5.79866	5.80878	5.76284	5.74954	5.71471	5.70676	5.66865	5.66443
0.281	5.90194	5.89024	5.84439	5.85629	5.80023	5.80868	5.74909	5.74942	5.70795	5.70663	5.66177	5.6643
0.282	5.89112	5.89023	5.8493	5.85623	5.80644	5.80858	5.75366	5.74929	5.7079	5.7065	5.65458	5.66418
0.283	5.90055	5.89021	5.85052	5.85617	5.81768	5.80847	5.75093	5.74917	5.70678	5.70637	5.67143	5.66405
0.284	5.89975	5.89019	5.86727	5.85612	5.80212	5.80837	5.7483	5.74905	5.70864	5.70623	5.65481	5.66393
0.285	5.89442	5.89017	5.86774	5.85606	5.80205	5.80826	5.74355	5.74892	5.71075	5.7061	5.65597	5.66381
0.286	5.8901	5.89016	5.86656	5.856	5.81188	5.80816	5.72907	5.7488	5.70669	5.70597	5.66332	5.66369
0.287	5.90466	5.89014	5.85763	5.85594	5.80619	5.80806	5.73353	5.74868	5.70688	5.70584	5.66174	5.66356
0.288	5.88711	5.89012	5.84208	5.85589	5.81414	5.80795	5.74134	5.74855	5.70019	5.70571	5.65581	5.66344
0.289	5.89189	5.89011	5.86267	5.85583	5.79739	5.80785	5.74385	5.74843	5.70657	5.70558	5.66655	5.66332
0.29	5.89664	5.89009	5.85296	5.85577	5.81489	5.80774	5.74833	5.74831	5.70644	5.70545	5.66651	5.6632
0.291	5.9	5.89007	5.85609	5.85572	5.81484	5.80764	5.74657	5.74819	5.69758	5.70532	5.67446	5.66308
0.292	5.88397	5.89005	5.85328	5.85566	5.80985	5.80754	5.75275	5.74807	5.70514	5.7052	5.66379	5.66296
0.293	5.87313	5.89004	5.85709	5.8556	5.79487	5.80744	5.74823	5.74794	5.71161	5.70507	5.6568	5.66284
0.294	5.8888	5.89002	5.85619	5.85555	5.82662	5.80733	5.7574	5.74782	5.7137	5.70494	5.66588	5.66273
0.295	5.89115	5.89	5.86956	5.85549	5.82469	5.80723	5.77104	5.7477	5.71548	5.70481	5.66259	5.66261
0.296	5.88379	5.88999	5.85097	5.85543	5.80823	5.80713	5.72639	5.74758	5.70683	5.70469	5.65679	5.66249
0.297	5.90395	5.88997	5.85386	5.85538	5.80774	5.80703	5.73804	5.74746	5.6911	5.70456	5.65766	5.66238
0.298	5.88389	5.88995	5.85465	5.85532	5.80908	5.80693	5.73522	5.74734	5.71275	5.70444	5.66805	5.66226
0.299	5.89398	5.88993	5.85154	5.85526	5.81573	5.80682	5.72085	5.74722	5.70505	5.70431	5.67313	5.66214
0.3	5.89247	5.88992	5.85616	5.85521	5.80629	5.80672	5.73231	5.7471	5.70424	5.70419	5.66255	5.66203
0.301	5.88474	5.8899	5.84732	5.85515	5.80594	5.80662	5.73896	5.74698	5.70734	5.70406	5.67365	5.66191
0.302	5.89351	5.88988	5.85991	5.85509	5.80201	5.80652	5.75417	5.74687	5.69987	5.70394	5.66107	5.6618
0.303	5.88835	5.88986	5.85712	5.85504	5.81192	5.80642	5.75811	5.74675	5.6844	5.70381	5.65895	5.66169
0.304	5.8863	5.88985	5.84067	5.85498	5.8092	5.80632	5.75358	5.74663	5.70422	5.70369	5.66596	5.66157
0.305	5.89344	5.88983	5.85113	5.85492	5.80539	5.80622	5.75158	5.74651	5.70181	5.70357	5.66495	5.66146
0.306	5.90212	5.88981	5.85407	5.85487	5.80406	5.80612	5.74085	5.74639	5.71012	5.70344	5.66466	5.66135
0.307	5.89976	5.8898	5.84784	5.85481	5.80825	5.80602	5.73931	5.74628	5.70057	5.70332	5.66831	5.66124
0.308	5.89633	5.88978	5.85266	5.85476	5.80408	5.80591	5.74423	5.74616	5.70708	5.7032	5.65837	5.66113
0.309	5.89825	5.88976	5.86171	5.8547	5.80332	5.80581	5.74667	5.74604	5.7051	5.70308	5.64994	5.66102
0.31	5.87964	5.88975	5.85887	5.85464	5.80401	5.80572	5.74785	5.74593	5.70574	5.70296	5.66199	5.66091
0.311	5.88986	5.88973	5.86003	5.85459	5.81369	5.80561	5.74187	5.74581	5.71404	5.70283	5.66013	5.6608
0.312	5.89353	5.88971	5.84957	5.85453	5.79762	5.80552	5.73495	5.7457	5.70009	5.70271	5.6551	5.66069
0.313	5.89628	5.88969	5.83932	5.85448	5.81256	5.80542	5.7615	5.74558	5.69673	5.70259	5.66286	5.66058
0.314	5.88664	5.88968	5.84859	5.85442	5.81898	5.80532	5.74327	5.74547	5.70191	5.70247	5.66076	5.66047
0.315	5.87599	5.88966	5.85481	5.85437	5.80885	5.80522	5.75873	5.74535	5.6952	5.70236	5.65692	5.66037
0.316	5.89432	5.88964	5.85527	5.85431	5.80756	5.80512	5.74336	5.74524	5.69832	5.70224	5.66116	5.66026
0.317	5.88772	5.88963	5.85098	5.85425	5.80017	5.80502	5.73956	5.74512	5.70393	5.70212	5.65395	5.66015
0.318	5.89153	5.88961	5.85088	5.8542	5.80074	5.80492	5.75559	5.74501	5.69812	5.702	5.65817	5.66005
0.319	5.89443	5.88959	5.8413	5.85414	5.80147	5.80482	5.74952	5.74489	5.70413	5.70188	5.66159	5.65994
0.32	5.89825	5.88958	5.85093	5.85409	5.7961	5.80472	5.7579	5.74478	5.70069	5.70176	5.64698	5.65984
0.321	5.90297	5.88956	5.85547	5.85403	5.79275	5.80462	5.75268	5.74467	5.69842	5.70165	5.6688	5.65973
0.322	5.8944	5.88954	5.8561	5.85398	5.80295	5.80453	5.75215	5.74455	5.69667	5.70153	5.65577	5.65963
0.323	5.8987	5.88953	5.85011	5.85392	5.80121	5.80443	5.75293	5.74444	5.69758	5.70141	5.66122	5.65952
0.324	5.89951	5.88951	5.84404	5.85387	5.80458	5.80433	5.73922	5.74433	5.70858	5.7013	5.656	5.65942
0.325	5.88262	5.88949	5.86179	5.85381	5.80276	5.80423	5.75338	5.74422	5.70439	5.70118	5.65839	5.65932
0.326	5.88625	5.88947	5.85149	5.85376	5.79705	5.80414	5.75699	5.7441	5.69463	5.70107	5.66143	5.65921
0.327	5.89126	5.88946	5.8544	5.8537	5.80168	5.80404	5.70742	5.74399	5.69875	5.70095	5.65415	5.65911
0.328	5.89698	5.88944	5.8586	5.85365	5.80876	5.80394	5.72591	5.74388	5.69402	5.70084	5.66228	5.65901
0.329	5.9038	5.88942	5.86858	5.85359	5.81272	5.80384	5.72169	5.74377	5.7011	5.70072	5.65739	5.65891
0.33	5.88747	5.88941	5.85094	5.85354	5.81374	5.80375	5.74467	5.74366	5.69613	5.70061	5.6596	5.65881
0.331	5.88252	5.88939	5.85534	5.85348	5.80259	5.80365	5.76284	5.74355	5.69262	5.70049	5.65795	5.65871
0.332	5.88948	5.88937	5.8441	5.85343	5.79845	5.80355	5.75661	5.74344	5.69595	5.70038	5.66136	5.65861
0.333	5.88161	5.88936	5.85429	5.85337	5.80487	5.80346	5.75284	5.74333	5.69755	5.70027	5.6598	5.65851
0.334	5.87524	5.88934	5.84673	5.85332	5.79918	5.80336	5.74493	5.74322	5.69931	5.70016	5.65883	5.65841
0.335	5.90069	5.88932	5.85572	5.85326	5.80802	5.80327	5.73769	5.74311	5.69946	5.70004	5.66301	5.65831
0.336	5.8909	5.88931	5.8435	5.85321	5.80102	5.80317	5.74946	5.743	5.70332	5.69993	5.66066	5.65822
0.337	5.89032	5.88929	5.84927	5.85315	5.81341	5.80307	5.73263	5.74289	5.69441	5.69982	5.65174	5.65812
0.338	5.88917	5.88927	5.84191	5.8531	5.79761	5.80298	5.74331	5.74278	5.69283	5.69971	5.65469	5.65802
0.339	5.89922	5.88926	5.84308	5.85304	5.80956	5.80288	5.75883	5.74267	5.69154	5.6996	5.65573	5.65792
0.34	5.89622	5.88924	5.85612	5.85299	5.802	5.80279	5.74879	5.74256	5.69464	5.69949	5.66287	5.65783
0.341	5.89839	5.88922	5.86109	5.85293	5.79788	5.80269	5.76134	5.74246	5.70566	5.69938	5.65438	5.65773
0.342	5.90327	5.88921	5.85004	5.85288	5.7958	5.8026	5.74241	5.74235	5.69353	5.69927	5.65865	5.65764
0.343	5.87602	5.88919	5.84514	5.85283	5.80759	5.8025	5.72534	5.74224	5.69658	5.69916	5.65324	5.65754
0.344	5.89452	5.88917	5.85523	5.85277	5.8153	5.80241	5.72746	5.74213	5.70063	5.69905	5.65211	5.65745
0.345	5.89729	5.88916	5.86005	5.85272	5.81708	5.80231	5.7186	5.74203	5.69756	5.69894	5.6477	5.65735
0.346	5.88636	5.88914	5.8562	5.85266	5.78765	5.80222	5.74443	5.74192	5.69749	5.69883	5.65043	5.65726
0.347	5.88417	5.88912	5.85848	5.85261	5.80124	5.80212	5.76825	5.74181	5.68782	5.69872	5.66744	5.65717
0.348	5.88706	5.88911	5.86365	5.85255	5.79152	5.80203	5.7299	5.74171	5.7028	5.69862	5.66658	5.65707
0.349	5.89148	5.88909	5.83871	5.8525	5.79265	5.80193	5.72177	5.7416	5.70112	5.69851	5.65946	5.65698
0.35	5.89678	5.88907	5.85194	5.85245	5.80103	5.80184	5.74088	5.7415	5.70254	5.6984	5.65918	5.65689
0.351	5.88081	5.88906	5.85494	5.85239	5.79327	5.80175	5.74049	5.74139	5.68652	5.69829	5.64934	5.6568
0.352	5.88972	5.88904	5.84929	5.85234	5.79908	5.80165	5.7334	5.74129	5.69604	5.69819	5.65815	5.65671
0.353	5.90674	5.88902	5.83595	5.85228	5.79358	5.80156	5.74177	5.74118	5.7077	5.69808	5.65893	5.65661
0.354	5.88859	5.88901	5.83994	5.85223	5.79871	5.80147	5.73762	5.74108	5.69392	5.69798	5.65466	5.65652
0.355	5.88113	5.88899	5.8581	5.85218	5.79132	5.80137	5.75051	5.74097	5.70042	5.69787	5.65145	5.65643
0.356	5.89673	5.88897	5.85495	5.85212	5.80539	5.80128	5.73805	5.74087	5.70517	5.69777	5.6519	5.65634
0.357	5.88776	5.88896	5.84352	5.85207	5.79758	5.80119	5.74374	5.74076	5.69123	5.69766	5.64822	5.65625
0.358	5.89613	5.88894	5.85469	5.85202	5.79785	5.80109	5.734	5.74066	5.70186	5.69756	5.66487	5.65616
0.359	5.88745	5.88892	5.85027	5.85196	5.79296	5.801	5.75058	5.74056	5.68627	5.69745	5.65652	5.65608
0.36	5.88131	5.88891	5.86657	5.85191	5.80798	5.80091	5.72899	5.74045	5.69654	5.69735	5.65556	5.65599
0.361	5.88612	5.88889	5.846	5.85185	5.79442	5.80082	5.74344	5.74035	5.69147	5.69724	5.65422	5.6559
0.362	5.88491	5.88887	5.85348	5.8518	5.78903	5.80073	5.73662	5.74025	5.68582	5.69714	5.65662	5.65581
0.363	5.88265	5.88886	5.85315	5.85175	5.79677	5.80063	5.73389	5.74014	5.7017	5.69704	5.65855	5.65573
0.364	5.89827	5.88884	5.84877	5.85169	5.80277	5.80054	5.75349	5.74004	5.69227	5.69694	5.65357	5.65564
0.365	5.89547	5.88882	5.85685	5.85164	5.79449	5.80045	5.75071	5.73994	5.69874	5.69683	5.66322	5.65555
0.366	5.89154	5.88881	5.84386	5.85159	5.78969	5.80036	5.74241	5.73984	5.69803	5.69673	5.66113	5.65547
0.367	5.88533	5.88879	5.83968	5.85153	5.79195	5.80027	5.73331	5.73974	5.69605	5.69663	5.64993	5.65538
0.368	5.8868	5.88877	5.85049	5.85148	5.80097	5.80018	5.75208	5.73964	5.69252	5.69653	5.65124	5.6553
0.369	5.8928	5.88876	5.84981	5.85143	5.79678	5.80008	5.72095	5.73954	5.70004	5.69643	5.6506	5.65521
0.37	5.89683	5.88874	5.85693	5.85138	5.79909	5.79999	5.73276	5.73943	5.70545	5.69633	5.65606	5.65513
0.371	5.89862	5.88873	5.84781	5.85132	5.80083	5.7999	5.73784	5.73933	5.69047	5.69622	5.6543	5.65504
0.372	5.895	5.88871	5.84843	5.85127	5.80005	5.79981	5.73808	5.73923	5.69975	5.69612	5.65271	5.65496
0.373	5.89624	5.88869	5.84333	5.85122	5.78586	5.79972	5.73393	5.73913	5.68977	5.69603	5.65927	5.65487
0.374	5.88774	5.88868	5.84029	5.85116	5.79763	5.79963	5.73317	5.73903	5.69006	5.69593	5.65239	5.65479
0.375	5.87828	5.88866	5.84616	5.85111	5.78852	5.79954	5.73115	5.73893	5.70109	5.69583	5.65385	5.65471
0.376	5.88413	5.88864	5.84245	5.85106	5.80106	5.79945	5.73984	5.73883	5.69664	5.69573	5.65781	5.65463
0.377	5.88162	5.88863	5.83992	5.85101	5.79245	5.79936	5.73551	5.73874	5.70453	5.69563	5.65037	5.65454
0.378	5.89294	5.88861	5.84879	5.85095	5.8004	5.79927	5.73505	5.73864	5.69316	5.69553	5.6468	5.65446
0.379	5.89511	5.88859	5.84739	5.8509	5.78212	5.79918	5.73726	5.73854	5.69151	5.69543	5.65238	5.65438
0.38	5.8865	5.88858	5.8441	5.85085	5.79193	5.79909	5.74489	5.73844	5.69738	5.69533	5.65971	5.6543
0.381	5.89198	5.88856	5.85268	5.85079	5.79451	5.799	5.71135	5.73834	5.68933	5.69524	5.64799	5.65422
0.382	5.89957	5.88855	5.84936	5.85074	5.80759	5.79891	5.7466	5.73824	5.69928	5.69514	5.65035	5.65414
0.383	5.88573	5.88853	5.84557	5.85069	5.79341	5.79882	5.72404	5.73815	5.7098	5.69504	5.63961	5.65406
0.384	5.8936	5.88851	5.86045	5.85064	5.79668	5.79873	5.73441	5.73805	5.6831	5.69495	5.66027	5.65398
0.385	5.88125	5.8885	5.85556	5.85058	5.79839	5.79864	5.72681	5.73795	5.69179	5.69485	5.6648	5.6539
0.386	5.88132	5.88848	5.83789	5.85053	5.79812	5.79856	5.74502	5.73785	5.6997	5.69475	5.66107	5.65382
0.387	5.89885	5.88846	5.85905	5.85048	5.80302	5.79847	5.74483	5.73776	5.68672	5.69466	5.65107	5.65374
0.388	5.89972	5.88845	5.84865	5.85043	5.78841	5.79838	5.73878	5.73766	5.6917	5.69456	5.65324	5.65366
0.389	5.89144	5.88843	5.85511	5.85038	5.78871	5.79829	5.74372	5.73756	5.68691	5.69447	5.659	5.65359
0.39	5.88737	5.88842	5.84831	5.85032	5.80041	5.7982	5.73747	5.73747	5.69217	5.69437	5.65771	5.65351
0.391	5.88992	5.8884	5.84283	5.85027	5.80542	5.79811	5.73877	5.73737	5.69101	5.69428	5.66482	5.65343
0.392	5.88062	5.88838	5.85533	5.85022	5.79874	5.79803	5.74785	5.73728	5.69249	5.69418	5.6546	5.65335
0.393	5.88615	5.88837	5.84534	5.85017	5.80267	5.79794	5.72868	5.73718	5.69401	5.69409	5.65257	5.65328
0.394	5.89223	5.88835	5.84314	5.85012	5.79438	5.79785	5.7336	5.73709	5.68344	5.69399	5.65029	5.6532
0.395	5.87704	5.88833	5.84901	5.85006	5.80764	5.79776	5.73995	5.73699	5.68892	5.6939	5.65382	5.65313
0.396	5.88357	5.88832	5.86486	5.85001	5.79613	5.79768	5.73613	5.7369	5.70021	5.69381	5.654	5.65305
0.397	5.89658	5.8883	5.85101	5.84996	5.80622	5.79759	5.73601	5.7368	5.70296	5.69371	5.6557	5.65297
0.398	5.90108	5.88829	5.84393	5.84991	5.80232	5.7975	5.73101	5.73671	5.68716	5.69362	5.6477	5.6529
0.399	5.89439	5.88827	5.8556	5.84986	5.80775	5.79741	5.73102	5.73661	5.70304	5.69353	5.64773	5.65283
0.4	5.88795	5.88825	5.8586	5.8498	5.7911	5.79733	5.74772	5.73652	5.69177	5.69344	5.65302	5.65275
0.401	5.88267	5.88824	5.85546	5.84975	5.80218	5.79724	5.73372	5.73643	5.70458	5.69335	5.65182	5.65268
0.402	5.88209	5.88822	5.84867	5.8497	5.80071	5.79715	5.72637	5.73633	5.68803	5.69325	5.66022	5.6526
0.403	5.88465	5.88821	5.85155	5.84965	5.79163	5.79707	5.74579	5.73624	5.68483	5.69316	5.65469	5.65253
0.404	5.89807	5.88819	5.84617	5.8496	5.7869	5.79698	5.74751	5.73615	5.69966	5.69307	5.65314	5.65246
0.405	5.88764	5.88817	5.85955	5.84955	5.79753	5.79689	5.75297	5.73605	5.68332	5.69298	5.65305	5.65238
0.406	5.87983	5.88816	5.86123	5.84949	5.80447	5.79681	5.73846	5.73596	5.70064	5.69289	5.63831	5.65231
0.407	5.891	5.88814	5.84132	5.84944	5.80204	5.79672	5.73999	5.73587	5.6857	5.6928	5.65137	5.65224
0.408	5.89167	5.88812	5.85167	5.84939	5.79433	5.79664	5.73909	5.73578	5.69039	5.69271	5.64808	5.65217
0.409	5.89744	5.88811	5.86124	5.84934	5.80279	5.79655	5.74734	5.73568	5.69399	5.69262	5.65376	5.65209
0.41	5.88306	5.88809	5.84297	5.84929	5.7923	5.79647	5.72108	5.73559	5.69367	5.69253	5.64732	5.65202
0.411	5.89633	5.88808	5.85799	5.84924	5.80255	5.79638	5.73624	5.7355	5.68717	5.69244	5.64839	5.65195
0.412	5.87728	5.88806	5.85	5.84919	5.80325	5.7963	5.73009	5.73541	5.68093	5.69235	5.65629	5.65188
0.413	5.87863	5.88804	5.85467	5.84914	5.80812	5.79621	5.73632	5.73532	5.69117	5.69226	5.64742	5.65181
0.414	5.89653	5.88803	5.85136	5.84908	5.79686	5.79612	5.72323	5.73523	5.68336	5.69218	5.64931	5.65174
0.415	5.88516	5.88801	5.84851	5.84903	5.79267	5.79604	5.72113	5.73514	5.69408	5.69209	5.64713	5.65167
0.416	5.89355	5.888	5.82914	5.84898	5.79308	5.79596	5.73842	5.73505	5.68651	5.692	5.65776	5.6516
0.417	5.89839	5.88798	5.84349	5.84893	5.80784	5.79587	5.71888	5.73496	5.67256	5.69191	5.66108	5.65153
0.418	5.88801	5.88796	5.84501	5.84888	5.8069	5.79579	5.74505	5.73487	5.69337	5.69182	5.64512	5.65146
0.419	5.88774	5.88795	5.84434	5.84883	5.79079	5.7957	5.73186	5.73478	5.68324	5.69174	5.65703	5.65139
0.42	5.89606	5.88793	5.85862	5.84878	5.79317	5.79562	5.7444	5.73469	5.68724	5.69165	5.6604	5.65132
0.421	5.88104	5.88792	5.85065	5.84873	5.78896	5.79553	5.73369	5.7346	5.68887	5.69156	5.6555	5.65126
0.422	5.88877	5.8879	5.85897	5.84868	5.78063	5.79545	5.74788	5.73451	5.68609	5.69148	5.65875	5.65119
0.423	5.88586	5.88788	5.8588	5.84863	5.79468	5.79537	5.73031	5.73442	5.68082	5.69139	5.64415	5.65112
0.424	5.87895	5.88787	5.85781	5.84858	5.79474	5.79528	5.74338	5.73433	5.70089	5.69131	5.64593	5.65105
0.425	5.88418	5.88785	5.8564	5.84853	5.79307	5.7952	5.73671	5.73424	5.68789	5.69122	5.6577	5.65099
0.426	5.88937	5.88784	5.85493	5.84848	5.79016	5.79512	5.74922	5.73416	5.69327	5.69114	5.66287	5.65092
0.427	5.88209	5.88782	5.85137	5.84842	5.80268	5.79503	5.73466	5.73407	5.70237	5.69105	5.64487	5.65085
0.428	5.90101	5.8878	5.84986	5.84837	5.7832	5.79495	5.76002	5.73398	5.68946	5.69097	5.65493	5.65079
0.429	5.88356	5.88779	5.85459	5.84832	5.7806	5.79487	5.72863	5.73389	5.68303	5.69088	5.6449	5.65072
0.43	5.87364	5.88777	5.85095	5.84827	5.804	5.79478	5.75006	5.7338	5.6737	5.6908	5.65411	5.65065
0.431	5.87964	5.88776	5.85257	5.84822	5.78733	5.7947	5.73755	5.73372	5.69037	5.69071	5.65049	5.65059
0.432	5.89551	5.88774	5.8529	5.84817	5.79308	5.79462	5.73517	5.73363	5.69992	5.69063	5.65699	5.65052
0.433	5.89331	5.88773	5.85577	5.84812	5.7914	5.79453	5.7394	5.73354	5.69635	5.69054	5.65591	5.65046
0.434	5.89065	5.88771	5.8525	5.84807	5.79448	5.79445	5.73606	5.73346	5.68937	5.69046	5.64774	5.65039
0.435	5.87736	5.88769	5.85419	5.84802	5.79411	5.79437	5.73559	5.73337	5.69151	5.69038	5.64167	5.65033
0.436	5.87563	5.88768	5.83639	5.84797	5.79364	5.79429	5.72842	5.73328	5.68311	5.6903	5.6537	5.65027
0.437	5.88561	5.88766	5.83852	5.84792	5.79611	5.79421	5.73173	5.7332	5.69431	5.69021	5.65219	5.6502
0.438	5.90019	5.88765	5.83783	5.84787	5.79325	5.79412	5.73883	5.73311	5.69627	5.69013	5.64962	5.65014
0.439	5.89396	5.88763	5.85044	5.84782	5.77944	5.79404	5.73907	5.73303	5.68642	5.69005	5.6494	5.65007
0.44	5.88693	5.88761	5.84359	5.84777	5.79294	5.79396	5.73851	5.73294	5.68142	5.68997	5.63901	5.65001
0.441	5.88445	5.8876	5.85465	5.84772	5.79737	5.79388	5.73453	5.73286	5.67809	5.68989	5.65591	5.64995
0.442	5.89192	5.88758	5.86251	5.84767	5.78446	5.7938	5.74027	5.73277	5.68245	5.6898	5.64844	5.64989
0.443	5.88542	5.88757	5.846	5.84762	5.78711	5.79372	5.73255	5.73269	5.68557	5.68972	5.6454	5.64982
0.444	5.87905	5.88755	5.84056	5.84757	5.78908	5.79364	5.73489	5.7326	5.6787	5.68964	5.65882	5.64976
0.445	5.88183	5.88754	5.85477	5.84752	5.80278	5.79355	5.73495	5.73252	5.68246	5.68956	5.64854	5.6497
0.446	5.88393	5.88752	5.8525	5.84747	5.79616	5.79347	5.7388	5.73243	5.69403	5.68948	5.65496	5.64964
0.447	5.88981	5.8875	5.85342	5.84742	5.79271	5.79339	5.73873	5.73235	5.69454	5.6894	5.65138	5.64958
0.448	5.89102	5.88749	5.84802	5.84737	5.79069	5.79331	5.72616	5.73226	5.68992	5.68932	5.6429	5.64952
0.449	5.87677	5.88747	5.85446	5.84732	5.78514	5.79323	5.7334	5.73218	5.68587	5.68924	5.66472	5.64945
0.45	5.88346	5.88746	5.8422	5.84728	5.79313	5.79315	5.74343	5.7321	5.68437	5.68916	5.65165	5.64939
0.451	5.87703	5.88744	5.85402	5.84723	5.78981	5.79307	5.71728	5.73201	5.68954	5.68908	5.64918	5.64933
0.452	5.88219	5.88743	5.83925	5.84718	5.7886	5.79299	5.73648	5.73193	5.68971	5.689	5.64791	5.64927
0.453	5.88143	5.88741	5.85841	5.84713	5.78161	5.79291	5.7232	5.73185	5.69037	5.68892	5.64437	5.64921
0.454	5.88736	5.88739	5.85699	5.84708	5.7996	5.79283	5.73833	5.73177	5.69876	5.68884	5.65746	5.64915
0.455	5.88969	5.88738	5.84466	5.84703	5.78598	5.79275	5.73719	5.73168	5.68691	5.68877	5.64695	5.64909
0.456	5.8833	5.88736	5.83697	5.84698	5.78539	5.79267	5.73624	5.7316	5.70136	5.68869	5.63468	5.64903
0.457	5.89563	5.88735	5.86008	5.84693	5.7859	5.79259	5.73646	5.73152	5.68662	5.68861	5.64761	5.64898
0.458	5.8776	5.88733	5.83948	5.84688	5.77655	5.79251	5.72621	5.73144	5.68062	5.68853	5.65121	5.64892
0.459	5.87787	5.88732	5.8546	5.84683	5.79653	5.79243	5.7273	5.73136	5.67879	5.68846	5.65018	5.64886
0.46	5.88785	5.8873	5.84641	5.84678	5.79479	5.79235	5.72278	5.73127	5.68487	5.68838	5.64682	5.6488
0.461	5.89462	5.88729	5.82694	5.84673	5.78505	5.79228	5.71243	5.73119	5.69256	5.6883	5.6461	5.64874
0.462	5.88885	5.88727	5.8451	5.84668	5.79282	5.7922	5.73382	5.73111	5.69169	5.68822	5.64588	5.64868
0.463	5.88897	5.88725	5.84075	5.84664	5.78691	5.79212	5.73662	5.73103	5.69098	5.68815	5.65226	5.64863
0.464	5.89183	5.88724	5.84078	5.84659	5.80299	5.79204	5.72374	5.73095	5.68667	5.68807	5.65072	5.64857
0.465	5.88378	5.88722	5.84039	5.84654	5.78212	5.79196	5.73356	5.73087	5.68877	5.688	5.6428	5.64851
0.466	5.88553	5.88721	5.83547	5.84649	5.7809	5.79188	5.73973	5.73079	5.67592	5.68792	5.65727	5.64845
0.467	5.87893	5.88719	5.85581	5.84644	5.79393	5.7918	5.73112	5.73071	5.68793	5.68784	5.65808	5.6484
0.468	5.89398	5.88718	5.84123	5.84639	5.79094	5.79173	5.72397	5.73063	5.67684	5.68777	5.65366	5.64834
0.469	5.87973	5.88716	5.83796	5.84634	5.79328	5.79165	5.71052	5.73055	5.67979	5.68769	5.64701	5.64829
0.47	5.88895	5.88715	5.84547	5.84629	5.78431	5.79157	5.73301	5.73047	5.69665	5.68762	5.64467	5.64823
0.471	5.87912	5.88713	5.84966	5.84625	5.79198	5.79149	5.73815	5.73039	5.67319	5.68754	5.64878	5.64817
0.472	5.88799	5.88711	5.85146	5.8462	5.78983	5.79141	5.73838	5.73031	5.68019	5.68747	5.64959	5.64812
0.473	5.87321	5.8871	5.84169	5.84615	5.7947	5.79134	5.72214	5.73023	5.69009	5.68739	5.65361	5.64806
0.474	5.89008	5.88708	5.84394	5.8461	5.78547	5.79126	5.73127	5.73015	5.68327	5.68732	5.63731	5.64801
0.475	5.89287	5.88707	5.84848	5.84605	5.77754	5.79118	5.71995	5.73007	5.68401	5.68725	5.64485	5.64795
0.476	5.89139	5.88705	5.85722	5.846	5.79837	5.7911	5.7289	5.72999	5.67764	5.68717	5.64171	5.6479
0.477	5.88741	5.88704	5.85133	5.84595	5.80187	5.79103	5.72757	5.72992	5.67865	5.6871	5.65488	5.64784
0.478	5.8783	5.88702	5.85129	5.84591	5.78594	5.79095	5.72842	5.72984	5.69289	5.68702	5.64191	5.64779
0.479	5.88216	5.88701	5.84951	5.84586	5.79273	5.79087	5.73238	5.72976	5.70038	5.68695	5.64197	5.64773
0.48	5.87659	5.88699	5.84473	5.84581	5.78583	5.7908	5.73102	5.72968	5.69278	5.68688	5.65263	5.64768
0.481	5.89339	5.88698	5.84609	5.84576	5.7916	5.79072	5.72478	5.7296	5.68127	5.68681	5.66155	5.64763
0.482	5.88718	5.88696	5.84359	5.84571	5.79302	5.79064	5.7332	5.72953	5.68315	5.68673	5.65008	5.64757
0.483	5.89574	5.88694	5.86227	5.84567	5.79556	5.79057	5.71543	5.72945	5.68375	5.68666	5.65173	5.64752
0.484	5.8951	5.88693	5.85679	5.84562	5.78901	5.79049	5.71697	5.72937	5.68295	5.68659	5.64073	5.64747
0.485	5.89379	5.88691	5.85263	5.84557	5.79813	5.79041	5.75029	5.7293	5.68234	5.68652	5.64417	5.64741
0.486	5.88305	5.8869	5.85454	5.84552	5.79198	5.79034	5.71304	5.72922	5.68099	5.68645	5.6465	5.64736
0.487	5.88924	5.88688	5.84603	5.84547	5.79501	5.79026	5.71622	5.72914	5.68465	5.68637	5.65286	5.64731
0.488	5.87976	5.88687	5.84809	5.84543	5.7895	5.79019	5.73728	5.72907	5.69366	5.6863	5.64785	5.64726
0.489	5.90445	5.88685	5.82805	5.84538	5.78943	5.79011	5.71461	5.72899	5.6803	5.68623	5.64814	5.6472
0.49	5.88741	5.88684	5.85001	5.84533	5.78331	5.79004	5.71222	5.72891	5.68461	5.68616	5.64884	5.64715
0.491	5.88116	5.88682	5.84535	5.84528	5.79153	5.78996	5.75186	5.72884	5.68978	5.68609	5.64916	5.6471
0.492	5.88706	5.88681	5.85265	5.84523	5.78623	5.78989	5.7264	5.72876	5.68625	5.68602	5.65691	5.64705
0.493	5.88811	5.88679	5.8577	5.84519	5.77992	5.78981	5.74106	5.72869	5.68685	5.68595	5.65725	5.647
0.494	5.88418	5.88678	5.84501	5.84514	5.79213	5.78973	5.73468	5.72861	5.68403	5.68588	5.65017	5.64695
0.495	5.8778	5.88676	5.84222	5.84509	5.78621	5.78966	5.73374	5.72854	5.68686	5.68581	5.65231	5.6469
0.496	5.8789	5.88674	5.83892	5.84504	5.781	5.78958	5.70765	5.72846	5.69071	5.68574	5.63463	5.64684
0.497	5.88286	5.88673	5.85038	5.845	5.78127	5.78951	5.73346	5.72839	5.68276	5.68567	5.64676	5.64679
0.498	5.88717	5.88671	5.85804	5.84495	5.7885	5.78944	5.72961	5.72831	5.69444	5.6856	5.65927	5.64674
0.499	5.89133	5.8867	5.8492	5.8449	5.7927	5.78936	5.7338	5.72824	5.68577	5.68553	5.63503	5.64669
0.5	5.88629	5.88668	5.85305	5.84485	5.79485	5.78929	5.7092	5.72816	5.6818	5.68546	5.64249	5.64664
0.501	5.88447	5.88667	5.83796	5.84481	5.78596	5.78921	5.72699	5.72809	5.69719	5.68539	5.65039	5.64659
0.502	5.88026	5.88665	5.85026	5.84476	5.79152	5.78914	5.73269	5.72801	5.67721	5.68532	5.64939	5.64654
0.503	5.8927	5.88664	5.82926	5.84471	5.77938	5.78906	5.73083	5.72794	5.68294	5.68526	5.6447	5.64649
0.504	5.89043	5.88662	5.8333	5.84467	5.78675	5.78899	5.75068	5.72787	5.6891	5.68519	5.64328	5.64645
0.505	5.8882	5.88661	5.84385	5.84462	5.77086	5.78892	5.72728	5.72779	5.69463	5.68512	5.63748	5.6464
0.506	5.89203	5.88659	5.82554	5.84457	5.78758	5.78884	5.71608	5.72772	5.68311	5.68505	5.62822	5.64635
0.507	5.89076	5.88658	5.85149	5.84452	5.78435	5.78877	5.74183	5.72765	5.68136	5.68498	5.65272	5.6463
0.508	5.89753	5.88656	5.83769	5.84448	5.79317	5.7887	5.71787	5.72757	5.68115	5.68492	5.64149	5.64625
0.509	5.88216	5.88655	5.84264	5.84443	5.7971	5.78862	5.74834	5.7275	5.6767	5.68485	5.6607	5.6462
0.51	5.89466	5.88653	5.84109	5.84438	5.78776	5.78855	5.72119	5.72743	5.6851	5.68478	5.64275	5.64615
0.511	5.89106	5.88652	5.85215	5.84434	5.78092	5.78848	5.73491	5.72736	5.68157	5.68472	5.63983	5.64611
0.512	5.87263	5.8865	5.84458	5.84429	5.79271	5.7884	5.73281	5.72728	5.68881	5.68465	5.66025	5.64606
0.513	5.89094	5.88649	5.8369	5.84424	5.79678	5.78833	5.71	5.72721	5.68032	5.68458	5.64575	5.64601
0.514	5.88857	5.88647	5.84235	5.84419	5.78758	5.78826	5.70616	5.72714	5.67895	5.68452	5.64751	5.64596
0.515	5.89397	5.88646	5.84123	5.84415	5.78937	5.78818	5.73525	5.72707	5.69038	5.68445	5.63624	5.64592
0.516	5.88645	5.88644	5.8475	5.8441	5.78953	5.78811	5.7272	5.727	5.68809	5.68438	5.64856	5.64587
0.517	5.88269	5.88643	5.85735	5.84405	5.79012	5.78804	5.74252	5.72693	5.68767	5.68432	5.64277	5.64582
0.518	5.88981	5.88641	5.83186	5.84401	5.77982	5.78797	5.74441	5.72685	5.6688	5.68425	5.64198	5.64578
0.519	5.88874	5.8864	5.84656	5.84396	5.78096	5.78789	5.72568	5.72678	5.67278	5.68419	5.65978	5.64573
0.52	5.87718	5.88638	5.84264	5.84391	5.80797	5.78782	5.71852	5.72671	5.69259	5.68412	5.64853	5.64568
0.521	5.88221	5.88637	5.84217	5.84387	5.78112	5.78775	5.73109	5.72664	5.6763	5.68406	5.6483	5.64564
0.522	5.88649	5.88635	5.83918	5.84382	5.78727	5.78768	5.71438	5.72657	5.68489	5.68399	5.64145	5.64559
0.523	5.89588	5.88634	5.84618	5.84378	5.7732	5.78761	5.71769	5.7265	5.67655	5.68393	5.64959	5.64554
0.524	5.89154	5.88632	5.8407	5.84373	5.78165	5.78753	5.72452	5.72643	5.68259	5.68386	5.64791	5.6455
0.525	5.87696	5.88631	5.84285	5.84368	5.78271	5.78746	5.73299	5.72636	5.67955	5.6838	5.63709	5.64545
0.526	5.87991	5.88629	5.85993	5.84364	5.79004	5.78739	5.72615	5.72629	5.68369	5.68374	5.64686	5.64541
0.527	5.89184	5.88628	5.84428	5.84359	5.78792	5.78732	5.72764	5.72622	5.67824	5.68367	5.64136	5.64536
0.528	5.878	5.88626	5.83695	5.84354	5.78738	5.78725	5.71502	5.72615	5.68578	5.68361	5.64748	5.64532
0.529	5.89962	5.88625	5.83791	5.8435	5.79294	5.78718	5.73634	5.72608	5.68704	5.68354	5.64517	5.64527
0.53	5.88718	5.88623	5.84589	5.84345	5.78754	5.78711	5.72345	5.72601	5.67644	5.68348	5.64363	5.64523
0.531	5.89244	5.88622	5.84444	5.8434	5.79303	5.78704	5.73905	5.72594	5.6697	5.68342	5.65278	5.64518
0.532	5.88803	5.8862	5.83864	5.84336	5.7846	5.78696	5.73358	5.72587	5.68565	5.68335	5.65487	5.64514
0.533	5.88171	5.88619	5.83051	5.84331	5.78465	5.78689	5.74273	5.7258	5.68087	5.68329	5.65817	5.64509
0.534	5.87609	5.88617	5.84477	5.84327	5.78772	5.78682	5.72677	5.72574	5.68503	5.68323	5.66131	5.64505
0.535	5.88269	5.88616	5.84615	5.84322	5.78346	5.78675	5.72221	5.72567	5.6861	5.68317	5.64822	5.64501
0.536	5.88741	5.88614	5.84772	5.84317	5.79173	5.78668	5.7366	5.7256	5.68736	5.6831	5.6311	5.64496
0.537	5.89131	5.88613	5.84944	5.84313	5.78331	5.78661	5.7244	5.72553	5.69664	5.68304	5.64181	5.64492
0.538	5.89369	5.88611	5.84306	5.84308	5.778	5.78654	5.7272	5.72546	5.67731	5.68298	5.64363	5.64488
0.539	5.87943	5.8861	5.84759	5.84304	5.78627	5.78647	5.7297	5.72539	5.68319	5.68292	5.65684	5.64483
0.54	5.88256	5.88608	5.84466	5.84299	5.78079	5.7864	5.73588	5.72533	5.6925	5.68286	5.65011	5.64479
0.541	5.88637	5.88607	5.8398	5.84295	5.79219	5.78633	5.7143	5.72526	5.68712	5.6828	5.65993	5.64475
0.542	5.87306	5.88605	5.84113	5.8429	5.78688	5.78626	5.7315	5.72519	5.68065	5.68273	5.64861	5.6447
0.543	5.88065	5.88604	5.83648	5.84285	5.7895	5.78619	5.7444	5.72512	5.68825	5.68267	5.64437	5.64466
0.544	5.88664	5.88602	5.8376	5.84281	5.78053	5.78612	5.7419	5.72506	5.67981	5.68261	5.63895	5.64462
0.545	5.89275	5.88601	5.83675	5.84276	5.7883	5.78605	5.72075	5.72499	5.69079	5.68255	5.65256	5.64458
0.546	5.88759	5.88599	5.85384	5.84272	5.79172	5.78598	5.72184	5.72492	5.69163	5.68249	5.64335	5.64453
0.547	5.88298	5.88598	5.83776	5.84267	5.78244	5.78591	5.72618	5.72486	5.69064	5.68243	5.64987	5.64449
0.548	5.89678	5.88596	5.84641	5.84263	5.78199	5.78585	5.71945	5.72479	5.67551	5.68237	5.64766	5.64445
0.549	5.89349	5.88595	5.84035	5.84258	5.78327	5.78578	5.70003	5.72472	5.68836	5.68231	5.64372	5.64441
0.55	5.89419	5.88593	5.8315	5.84254	5.7803	5.78571	5.71352	5.72466	5.68647	5.68225	5.65004	5.64437
0.551	5.87403	5.88592	5.8439	5.84249	5.78354	5.78564	5.71914	5.72459	5.68169	5.68219	5.63953	5.64432
0.552	5.88393	5.8859	5.83945	5.84244	5.79714	5.78557	5.72092	5.72452	5.68177	5.68213	5.64614	5.64428
0.553	5.89315	5.88589	5.83623	5.8424	5.7896	5.7855	5.72191	5.72446	5.6931	5.68207	5.65196	5.64424
0.554	5.88339	5.88587	5.84598	5.84235	5.78947	5.78543	5.7453	5.72439	5.68002	5.68201	5.65013	5.6442
0.555	5.87458	5.88586	5.83815	5.84231	5.76935	5.78536	5.74166	5.72433	5.689	5.68195	5.6451	5.64416
0.556	5.87637	5.88584	5.82601	5.84226	5.79254	5.7853	5.72695	5.72426	5.69534	5.68189	5.6425	5.64412
0.557	5.88257	5.88583	5.84725	5.84222	5.78621	5.78523	5.70923	5.7242	5.67975	5.68183	5.65425	5.64408
0.558	5.88674	5.88581	5.85063	5.84217	5.79635	5.78516	5.72391	5.72413	5.67658	5.68177	5.64226	5.64404
0.559	5.88844	5.8858	5.85715	5.84213	5.77829	5.78509	5.71802	5.72407	5.67696	5.68172	5.65227	5.644
0.56	5.88313	5.88579	5.84477	5.84208	5.79826	5.78502	5.74896	5.724	5.68266	5.68166	5.65598	5.64396
0.561	5.8844	5.88577	5.84682	5.84204	5.77934	5.78496	5.72427	5.72394	5.67607	5.6816	5.65481	5.64392
0.562	5.89354	5.88576	5.85084	5.84199	5.7817	5.78489	5.72313	5.72387	5.68067	5.68154	5.64678	5.64388
0.563	5.89452	5.88574	5.83987	5.84195	5.78994	5.78482	5.72743	5.72381	5.69468	5.68148	5.64441	5.64384
0.564	5.88548	5.88573	5.84908	5.8419	5.78976	5.78475	5.72934	5.72374	5.67997	5.68143	5.64147	5.6438
0.565	5.87628	5.88571	5.84835	5.84186	5.78096	5.78469	5.72985	5.72368	5.69236	5.68137	5.64292	5.64376
0.566	5.89124	5.8857	5.84781	5.84181	5.78198	5.78462	5.71259	5.72362	5.69093	5.68131	5.64013	5.64372
0.567	5.88544	5.88568	5.84658	5.84177	5.80255	5.78455	5.73292	5.72355	5.68142	5.68125	5.64415	5.64368
0.568	5.87064	5.88567	5.83918	5.84173	5.78441	5.78448	5.71954	5.72349	5.67965	5.6812	5.63548	5.64364
0.569	5.8859	5.88565	5.84824	5.84168	5.79278	5.78442	5.72589	5.72343	5.67984	5.68114	5.65898	5.6436
0.57	5.89543	5.88564	5.83845	5.84164	5.7893	5.78435	5.70132	5.72336	5.69021	5.68108	5.63594	5.64356
0.571	5.89578	5.88562	5.83543	5.84159	5.79433	5.78428	5.72494	5.7233	5.68099	5.68103	5.63472	5.64352
0.572	5.89054	5.88561	5.83998	5.84155	5.78453	5.78422	5.71915	5.72324	5.68412	5.68097	5.6419	5.64349
0.573	5.89755	5.88559	5.84842	5.8415	5.78643	5.78415	5.73417	5.72317	5.68127	5.68091	5.64004	5.64345
0.574	5.88507	5.88558	5.84362	5.84146	5.78303	5.78408	5.72149	5.72311	5.67485	5.68086	5.63816	5.64341
0.575	5.8796	5.88557	5.83373	5.84141	5.78271	5.78402	5.71782	5.72305	5.69062	5.6808	5.65244	5.64337
0.576	5.89486	5.88555	5.83636	5.84137	5.78111	5.78395	5.71345	5.72299	5.68275	5.68074	5.65269	5.64333
0.577	5.87573	5.88554	5.83764	5.84132	5.78117	5.78389	5.7253	5.72292	5.67383	5.68069	5.64806	5.6433
0.578	5.88359	5.88552	5.84093	5.84128	5.77616	5.78382	5.70073	5.72286	5.67934	5.68063	5.63797	5.64326
0.579	5.88505	5.88551	5.83796	5.84124	5.77687	5.78375	5.71103	5.7228	5.68747	5.68058	5.656	5.64322
0.58	5.87152	5.88549	5.83791	5.84119	5.78959	5.78369	5.71814	5.72274	5.68205	5.68052	5.64852	5.64318
0.581	5.88654	5.88548	5.8508	5.84115	5.77395	5.78362	5.71778	5.72267	5.68703	5.68047	5.63806	5.64314
0.582	5.87678	5.88546	5.84291	5.8411	5.78066	5.78356	5.71889	5.72261	5.67531	5.68041	5.64196	5.64311
0.583	5.88088	5.88545	5.84332	5.84106	5.79025	5.78349	5.70869	5.72255	5.68548	5.68036	5.64434	5.64307
0.584	5.8908	5.88543	5.84287	5.84102	5.78238	5.78343	5.73761	5.72249	5.66769	5.6803	5.64642	5.64303
0.585	5.88285	5.88542	5.83401	5.84097	5.79016	5.78336	5.71495	5.72243	5.68108	5.68025	5.63536	5.643
0.586	5.88698	5.88541	5.83491	5.84093	5.78312	5.7833	5.73346	5.72237	5.68399	5.68019	5.6454	5.64296
0.587	5.89966	5.88539	5.82582	5.84088	5.79134	5.78323	5.70788	5.72231	5.67819	5.68014	5.64197	5.64292
0.588	5.89919	5.88538	5.84515	5.84084	5.78455	5.78316	5.71507	5.72225	5.68338	5.68008	5.638	5.64289
0.589	5.88181	5.88536	5.83739	5.8408	5.79262	5.7831	5.71772	5.72219	5.66919	5.68003	5.63616	5.64285
0.59	5.8885	5.88535	5.84379	5.84075	5.77963	5.78303	5.72455	5.72212	5.67873	5.67998	5.63001	5.64281
0.591	5.89128	5.88533	5.84622	5.84071	5.76494	5.78297	5.72934	5.72206	5.67861	5.67992	5.6413	5.64278
0.592	5.89412	5.88532	5.84226	5.84066	5.78561	5.78291	5.71568	5.722	5.68701	5.67987	5.6449	5.64274
0.593	5.88649	5.8853	5.83988	5.84062	5.78092	5.78284	5.72843	5.72194	5.68915	5.67981	5.64526	5.64271
0.594	5.87879	5.88529	5.84154	5.84058	5.77976	5.78278	5.71821	5.72188	5.6814	5.67976	5.65434	5.64267
0.595	5.87986	5.88527	5.84108	5.84053	5.79173	5.78271	5.72134	5.72182	5.68509	5.67971	5.6514	5.64263
0.596	5.87652	5.88526	5.84365	5.84049	5.75952	5.78265	5.73114	5.72176	5.68118	5.67966	5.64406	5.6426
0.597	5.88837	5.88525	5.84013	5.84045	5.78597	5.78258	5.71574	5.7217	5.68404	5.6796	5.63933	5.64256
0.598	5.89439	5.88523	5.86211	5.8404	5.79147	5.78252	5.72507	5.72165	5.67961	5.67955	5.64259	5.64253
0.599	5.88119	5.88522	5.84965	5.84036	5.77305	5.78246	5.73033	5.72159	5.67497	5.6795	5.64966	5.64249
0.6	5.89145	5.8852	5.83239	5.84032	5.77942	5.78239	5.7177	5.72153	5.67834	5.67944	5.64191	5.64246
0.601	5.89108	5.88519	5.84208	5.84027	5.78194	5.78233	5.7267	5.72147	5.67828	5.67939	5.64665	5.64242
0.602	5.8762	5.88517	5.84361	5.84023	5.77688	5.78226	5.72484	5.72141	5.67966	5.67934	5.64152	5.64239
0.603	5.89638	5.88516	5.83234	5.84019	5.77116	5.7822	5.72255	5.72135	5.69165	5.67929	5.64794	5.64235
0.604	5.88598	5.88515	5.83636	5.84014	5.77361	5.78214	5.72177	5.72129	5.67392	5.67924	5.62995	5.64232
0.605	5.88842	5.88513	5.83214	5.8401	5.79084	5.78207	5.73015	5.72123	5.68445	5.67918	5.64029	5.64228
0.606	5.87989	5.88512	5.82289	5.84006	5.7816	5.78201	5.72664	5.72117	5.68095	5.67913	5.63287	5.64225
0.607	5.8799	5.8851	5.84201	5.84001	5.78636	5.78195	5.70862	5.72112	5.67105	5.67908	5.64564	5.64221
0.608	5.8827	5.88509	5.83401	5.83997	5.78658	5.78188	5.72137	5.72106	5.68025	5.67903	5.65526	5.64218
0.609	5.87998	5.88507	5.8426	5.83993	5.78226	5.78182	5.71669	5.721	5.68001	5.67898	5.63892	5.64215
0.61	5.8709	5.88506	5.84173	5.83988	5.78151	5.78176	5.7343	5.72094	5.67395	5.67893	5.6287	5.64211
0.611	5.87341	5.88505	5.81704	5.83984	5.78762	5.7817	5.73457	5.72088	5.69023	5.67888	5.63987	5.64208
0.612	5.88122	5.88503	5.84714	5.8398	5.77632	5.78163	5.7167	5.72083	5.67242	5.67882	5.64519	5.64204
0.613	5.8746	5.88502	5.84222	5.83975	5.77626	5.78157	5.72567	5.72077	5.68573	5.67877	5.63911	5.64201
0.614	5.88887	5.885	5.83747	5.83971	5.78461	5.78151	5.71899	5.72071	5.67484	5.67872	5.6393	5.64198
0.615	5.8775	5.88499	5.8361	5.83967	5.77317	5.78144	5.72851	5.72065	5.68324	5.67867	5.6424	5.64194
0.616	5.88876	5.88497	5.84141	5.83962	5.7655	5.78138	5.72437	5.7206	5.67154	5.67862	5.64438	5.64191
0.617	5.89034	5.88496	5.83721	5.83958	5.77341	5.78132	5.73234	5.72054	5.67437	5.67857	5.6384	5.64188
0.618	5.87964	5.88495	5.83045	5.83954	5.77872	5.78126	5.71282	5.72048	5.67929	5.67852	5.63487	5.64184
0.619	5.87713	5.88493	5.83555	5.8395	5.77718	5.7812	5.72648	5.72043	5.66831	5.67847	5.64089	5.64181
0.62	5.88315	5.88492	5.83824	5.83945	5.79447	5.78113	5.72026	5.72037	5.68495	5.67842	5.63551	5.64178
0.621	5.88601	5.8849	5.84321	5.83941	5.78209	5.78107	5.72495	5.72031	5.68355	5.67837	5.64922	5.64175
0.622	5.88896	5.88489	5.8374	5.83937	5.77602	5.78101	5.71569	5.72026	5.67343	5.67832	5.63574	5.64171
0.623	5.88675	5.88487	5.83027	5.83933	5.77198	5.78095	5.71734	5.7202	5.68246	5.67827	5.64613	5.64168
0.624	5.87937	5.88486	5.82007	5.83928	5.76783	5.78089	5.70562	5.72014	5.67335	5.67822	5.63694	5.64165
0.625	5.86911	5.88485	5.83227	5.83924	5.78056	5.78083	5.72009	5.72009	5.68008	5.67817	5.64176	5.64162
0.626	5.88148	5.88483	5.84317	5.8392	5.78177	5.78076	5.73084	5.72003	5.67542	5.67813	5.64141	5.64158
0.627	5.88628	5.88482	5.83759	5.83916	5.78879	5.7807	5.72492	5.71998	5.69004	5.67808	5.64008	5.64155
0.628	5.87899	5.8848	5.83657	5.83911	5.77133	5.78064	5.71865	5.71992	5.67295	5.67803	5.63541	5.64152
0.629	5.88335	5.88479	5.83554	5.83907	5.78097	5.78058	5.73549	5.71987	5.67271	5.67798	5.63798	5.64149
0.63	5.89784	5.88478	5.83247	5.83903	5.7877	5.78052	5.70287	5.71981	5.68406	5.67793	5.63891	5.64145
0.631	5.88009	5.88476	5.83329	5.83899	5.77826	5.78046	5.7335	5.71976	5.67975	5.67788	5.62731	5.64142
0.632	5.88487	5.88475	5.8434	5.83894	5.78436	5.7804	5.70572	5.7197	5.67424	5.67783	5.64388	5.64139
0.633	5.86925	5.88473	5.84373	5.8389	5.79295	5.78034	5.71572	5.71964	5.68418	5.67779	5.62939	5.64136
0.634	5.89327	5.88472	5.84618	5.83886	5.78277	5.78028	5.7343	5.71959	5.68039	5.67774	5.6441	5.64133
0.635	5.90524	5.8847	5.83472	5.83882	5.78155	5.78022	5.71565	5.71954	5.68482	5.67769	5.63734	5.6413
0.636	5.89819	5.88469	5.82801	5.83877	5.76565	5.78016	5.71067	5.71948	5.67801	5.67764	5.6421	5.64127
0.637	5.89991	5.88468	5.83818	5.83873	5.77141	5.7801	5.74579	5.71943	5.67246	5.67759	5.65109	5.64123
0.638	5.87517	5.88466	5.8426	5.83869	5.77684	5.78003	5.70563	5.71937	5.68415	5.67755	5.6417	5.6412
0.639	5.89214	5.88465	5.83434	5.83865	5.78731	5.77997	5.72249	5.71932	5.67357	5.6775	5.64537	5.64117
0.64	5.86487	5.88463	5.83418	5.83861	5.78366	5.77991	5.70885	5.71926	5.67798	5.67745	5.63892	5.64114
0.641	5.89689	5.88462	5.8423	5.83856	5.78773	5.77985	5.72193	5.71921	5.6717	5.6774	5.64703	5.64111
0.642	5.87186	5.88461	5.85139	5.83852	5.78449	5.77979	5.70735	5.71916	5.67769	5.67736	5.62791	5.64108
0.643	5.88329	5.88459	5.84861	5.83848	5.77157	5.77973	5.72252	5.7191	5.68406	5.67731	5.6434	5.64105
0.644	5.88983	5.88458	5.82873	5.83844	5.78484	5.77967	5.7194	5.71905	5.68402	5.67726	5.65045	5.64102
0.645	5.88304	5.88456	5.83762	5.8384	5.78634	5.77962	5.73235	5.71899	5.68153	5.67722	5.64238	5.64099
0.646	5.87274	5.88455	5.83418	5.83836	5.79551	5.77956	5.73507	5.71894	5.6762	5.67717	5.64714	5.64096
0.647	5.87807	5.88454	5.83178	5.83831	5.78211	5.7795	5.71236	5.71889	5.67722	5.67712	5.63774	5.64093
0.648	5.87854	5.88452	5.84538	5.83827	5.77468	5.77944	5.71798	5.71883	5.67506	5.67708	5.63301	5.6409
0.649	5.88276	5.88451	5.84631	5.83823	5.78775	5.77938	5.74401	5.71878	5.67859	5.67703	5.6415	5.64087
0.65	5.88016	5.88449	5.83406	5.83819	5.77215	5.77932	5.72131	5.71873	5.66554	5.67698	5.63631	5.64084
0.651	5.87797	5.88448	5.84577	5.83815	5.76502	5.77926	5.72702	5.71868	5.67052	5.67694	5.64054	5.64081
0.652	5.87412	5.88447	5.84151	5.83811	5.77521	5.7792	5.7026	5.71862	5.67345	5.67689	5.63863	5.64078
0.653	5.88497	5.88445	5.83696	5.83806	5.77962	5.77914	5.71687	5.71857	5.67125	5.67685	5.64458	5.64075
0.654	5.88345	5.88444	5.83914	5.83802	5.77677	5.77908	5.71982	5.71852	5.67462	5.6768	5.63569	5.64072
0.655	5.88786	5.88442	5.83068	5.83798	5.79196	5.77902	5.72162	5.71846	5.67257	5.67675	5.63154	5.64069
0.656	5.88658	5.88441	5.82524	5.83794	5.77055	5.77896	5.70802	5.71841	5.67953	5.67671	5.63572	5.64066
0.657	5.88872	5.8844	5.84478	5.8379	5.77159	5.77891	5.71195	5.71836	5.67605	5.67666	5.64207	5.64063
0.658	5.88415	5.88438	5.84287	5.83786	5.78703	5.77885	5.73028	5.71831	5.67174	5.67662	5.63905	5.6406
0.659	5.88292	5.88437	5.83564	5.83781	5.77633	5.77879	5.70495	5.71826	5.67833	5.67657	5.63875	5.64057
0.66	5.89498	5.88435	5.84503	5.83777	5.78987	5.77873	5.73068	5.7182	5.66977	5.67653	5.64821	5.64054
0.661	5.88568	5.88434	5.84146	5.83773	5.7925	5.77867	5.72578	5.71815	5.68303	5.67648	5.64595	5.64051
0.662	5.87994	5.88433	5.83757	5.83769	5.76942	5.77861	5.71047	5.7181	5.68776	5.67644	5.63849	5.64048
0.663	5.8869	5.88431	5.82085	5.83765	5.76748	5.77856	5.70407	5.71805	5.67856	5.67639	5.63977	5.64045
0.664	5.89264	5.8843	5.83865	5.83761	5.78063	5.7785	5.70814	5.718	5.67658	5.67635	5.64394	5.64043
0.665	5.89871	5.88429	5.83859	5.83757	5.77646	5.77844	5.71669	5.71795	5.68386	5.6763	5.6555	5.6404
0.666	5.88883	5.88427	5.84008	5.83753	5.79271	5.77838	5.72734	5.7179	5.68708	5.67626	5.63934	5.64037
0.667	5.88659	5.88426	5.84329	5.83749	5.78251	5.77833	5.71857	5.71784	5.68032	5.67622	5.64645	5.64034
0.668	5.8777	5.88424	5.83052	5.83744	5.76558	5.77827	5.70473	5.71779	5.6774	5.67617	5.643	5.64031
0.669	5.88117	5.88423	5.84039	5.8374	5.78111	5.77821	5.72107	5.71774	5.67548	5.67613	5.63687	5.64028
0.67	5.87602	5.88422	5.83495	5.83736	5.77158	5.77815	5.72899	5.71769	5.68251	5.67608	5.63706	5.64025
0.671	5.89272	5.8842	5.84555	5.83732	5.78744	5.77809	5.72376	5.71764	5.67902	5.67604	5.63921	5.64023
0.672	5.88659	5.88419	5.83145	5.83728	5.77143	5.77804	5.74192	5.71759	5.66763	5.676	5.63311	5.6402
0.673	5.88697	5.88417	5.83496	5.83724	5.77295	5.77798	5.70745	5.71754	5.67104	5.67595	5.64833	5.64017
0.674	5.87948	5.88416	5.83824	5.8372	5.78768	5.77792	5.72928	5.71749	5.67055	5.67591	5.64476	5.64014
0.675	5.89714	5.88415	5.83874	5.83716	5.79646	5.77787	5.72423	5.71744	5.67897	5.67586	5.64826	5.64011
0.676	5.86455	5.88413	5.83253	5.83712	5.77179	5.77781	5.71731	5.71739	5.66899	5.67582	5.64914	5.64009
0.677	5.88618	5.88412	5.82278	5.83708	5.77815	5.77775	5.68773	5.71734	5.66707	5.67578	5.6459	5.64006
0.678	5.88746	5.88411	5.83912	5.83704	5.77466	5.7777	5.69728	5.71729	5.67736	5.67574	5.63607	5.64003
0.679	5.87866	5.88409	5.83492	5.837	5.77351	5.77764	5.72641	5.71724	5.67862	5.67569	5.63362	5.64
0.68	5.86504	5.88408	5.84447	5.83696	5.77652	5.77758	5.71874	5.71719	5.67699	5.67565	5.63774	5.63998
0.681	5.87283	5.88406	5.83017	5.83691	5.77467	5.77753	5.71749	5.71714	5.67435	5.67561	5.64066	5.63995
0.682	5.88137	5.88405	5.82194	5.83687	5.76526	5.77747	5.70923	5.71709	5.67716	5.67556	5.64379	5.63992
0.683	5.87109	5.88404	5.84654	5.83683	5.76625	5.77741	5.72084	5.71704	5.67236	5.67552	5.63738	5.63989
0.684	5.89076	5.88402	5.83811	5.83679	5.78105	5.77736	5.72289	5.71699	5.67064	5.67548	5.64185	5.63987
0.685	5.87924	5.88401	5.83928	5.83675	5.77222	5.7773	5.71392	5.71694	5.66805	5.67544	5.63663	5.63984
0.686	5.87193	5.884	5.83068	5.83671	5.77086	5.77724	5.72354	5.7169	5.66913	5.67539	5.63856	5.63981
0.687	5.89759	5.88398	5.85075	5.83667	5.78603	5.77719	5.71996	5.71685	5.68175	5.67535	5.65262	5.63979
0.688	5.88241	5.88397	5.82991	5.83663	5.77912	5.77713	5.73462	5.7168	5.67604	5.67531	5.63034	5.63976
0.689	5.89874	5.88396	5.8296	5.83659	5.78859	5.77708	5.72218	5.71675	5.67123	5.67527	5.63201	5.63973
0.69	5.89381	5.88394	5.84938	5.83655	5.78972	5.77702	5.73461	5.7167	5.66883	5.67523	5.63827	5.6397
0.691	5.88973	5.88393	5.83927	5.83651	5.76405	5.77697	5.71535	5.71665	5.68059	5.67518	5.64723	5.63968
0.692	5.87916	5.88391	5.83384	5.83647	5.77734	5.77691	5.7091	5.7166	5.67723	5.67514	5.63766	5.63965
0.693	5.87512	5.8839	5.84149	5.83643	5.7701	5.77685	5.7217	5.71656	5.67646	5.6751	5.63373	5.63962
0.694	5.87494	5.88389	5.82876	5.83639	5.77555	5.7768	5.72632	5.71651	5.67826	5.67506	5.6467	5.6396
0.695	5.88512	5.88387	5.84682	5.83635	5.77859	5.77674	5.70691	5.71646	5.68132	5.67502	5.6401	5.63957
0.696	5.8951	5.88386	5.84392	5.83631	5.77849	5.77669	5.71229	5.71641	5.67422	5.67498	5.64638	5.63955
0.697	5.88048	5.88385	5.84463	5.83627	5.77979	5.77663	5.72152	5.71636	5.67126	5.67493	5.64277	5.63952
0.698	5.88471	5.88383	5.8297	5.83623	5.78107	5.77658	5.7102	5.71632	5.66619	5.67489	5.63079	5.63949
0.699	5.88704	5.88382	5.8351	5.83619	5.77372	5.77652	5.73629	5.71627	5.67217	5.67485	5.6341	5.63947
0.7	5.87155	5.88381	5.83296	5.83615	5.77568	5.77647	5.70661	5.71622	5.6808	5.67481	5.64096	5.63944
0.701	5.87424	5.88379	5.85659	5.83611	5.7672	5.77641	5.71045	5.71617	5.68401	5.67477	5.63776	5.63942
0.702	5.89142	5.88378	5.83154	5.83607	5.78289	5.77636	5.71782	5.71613	5.66915	5.67473	5.648	5.63939
0.703	5.86749	5.88376	5.82514	5.83603	5.77641	5.7763	5.73285	5.71608	5.66768	5.67469	5.63803	5.63936
0.704	5.88074	5.88375	5.83477	5.83599	5.78154	5.77625	5.72867	5.71603	5.68219	5.67465	5.64942	5.63934
0.705	5.885	5.88374	5.82898	5.83595	5.7883	5.77619	5.73753	5.71598	5.67497	5.67461	5.63305	5.63931
0.706	5.87158	5.88372	5.82838	5.83591	5.76487	5.77614	5.72468	5.71594	5.6811	5.67457	5.64388	5.63929
0.707	5.89152	5.88371	5.83543	5.83587	5.78417	5.77609	5.72262	5.71589	5.6784	5.67453	5.63254	5.63926
0.708	5.88556	5.8837	5.83088	5.83583	5.789	5.77603	5.73626	5.71584	5.67652	5.67449	5.63264	5.63924
0.709	5.88818	5.88368	5.83511	5.83579	5.78606	5.77598	5.71169	5.7158	5.67127	5.67445	5.64724	5.63921
0.71	5.88397	5.88367	5.85141	5.83575	5.7791	5.77592	5.73331	5.71575	5.67763	5.67441	5.63887	5.63918
0.711	5.88419	5.88366	5.84006	5.83571	5.7696	5.77587	5.71685	5.7157	5.67031	5.67437	5.64933	5.63916
0.712	5.88504	5.88364	5.83036	5.83567	5.76336	5.77581	5.73661	5.71566	5.66592	5.67433	5.64154	5.63913
0.713	5.87716	5.88363	5.8372	5.83563	5.77556	5.77576	5.71938	5.71561	5.68999	5.67429	5.63781	5.63911
0.714	5.87845	5.88362	5.85186	5.8356	5.76815	5.77571	5.73964	5.71557	5.6759	5.67425	5.63665	5.63908
0.715	5.89295	5.8836	5.84474	5.83556	5.7728	5.77565	5.72098	5.71552	5.67262	5.67421	5.62456	5.63906
0.716	5.88053	5.88359	5.84384	5.83552	5.77584	5.7756	5.71425	5.71547	5.67273	5.67417	5.63181	5.63903
0.717	5.88894	5.88358	5.84922	5.83548	5.77476	5.77555	5.72774	5.71543	5.66711	5.67413	5.62683	5.63901
0.718	5.88922	5.88356	5.85256	5.83544	5.76969	5.77549	5.69877	5.71538	5.66894	5.67409	5.63297	5.63898
0.719	5.87307	5.88355	5.84011	5.8354	5.78097	5.77544	5.72526	5.71534	5.66399	5.67405	5.64879	5.63896
0.72	5.8767	5.88354	5.82902	5.83536	5.77484	5.77539	5.71617	5.71529	5.67578	5.67401	5.63834	5.63893
0.721	5.87453	5.88352	5.84649	5.83532	5.77547	5.77533	5.72118	5.71525	5.68075	5.67398	5.6467	5.63891
0.722	5.88641	5.88351	5.82628	5.83528	5.77494	5.77528	5.7233	5.7152	5.68103	5.67394	5.64193	5.63889
0.723	5.88816	5.88349	5.82531	5.83524	5.77508	5.77523	5.70461	5.71515	5.68134	5.6739	5.63693	5.63886
0.724	5.88762	5.88348	5.83389	5.8352	5.76345	5.77517	5.71674	5.71511	5.68243	5.67386	5.6381	5.63884
0.725	5.87495	5.88347	5.83131	5.83516	5.77326	5.77512	5.70744	5.71506	5.67747	5.67382	5.63768	5.63881
0.726	5.87603	5.88345	5.83272	5.83512	5.77478	5.77507	5.72648	5.71502	5.6783	5.67378	5.63886	5.63879
0.727	5.87729	5.88344	5.82971	5.83509	5.77495	5.77501	5.71455	5.71497	5.68231	5.67374	5.63774	5.63876
0.728	5.87869	5.88343	5.83073	5.83505	5.75844	5.77496	5.71891	5.71493	5.67164	5.67371	5.64512	5.63874
0.729	5.87404	5.88341	5.83186	5.83501	5.78388	5.77491	5.72574	5.71489	5.67572	5.67367	5.64314	5.63872
0.73	5.8822	5.8834	5.84001	5.83497	5.76456	5.77486	5.69623	5.71484	5.67598	5.67363	5.63956	5.63869
0.731	5.87704	5.88339	5.83563	5.83493	5.79046	5.7748	5.72621	5.7148	5.67881	5.67359	5.62964	5.63867
0.732	5.87511	5.88337	5.83327	5.83489	5.76566	5.77475	5.70011	5.71475	5.67466	5.67355	5.63606	5.63864
0.733	5.88602	5.88336	5.83577	5.83485	5.76545	5.7747	5.72203	5.71471	5.67606	5.67352	5.64374	5.63862
0.734	5.89256	5.88335	5.82915	5.83481	5.78668	5.77465	5.70843	5.71466	5.67408	5.67348	5.64378	5.6386
0.735	5.8905	5.88333	5.82906	5.83477	5.77272	5.77459	5.69611	5.71462	5.67879	5.67344	5.641	5.63857
0.736	5.87758	5.88332	5.83172	5.83474	5.77548	5.77454	5.72691	5.71458	5.66662	5.6734	5.63223	5.63855
0.737	5.889	5.88331	5.82959	5.8347	5.76399	5.77449	5.70226	5.71453	5.67813	5.67337	5.64141	5.63852
0.738	5.88299	5.8833	5.83683	5.83466	5.77238	5.77444	5.71301	5.71449	5.67169	5.67333	5.63858	5.6385
0.739	5.87532	5.88328	5.83237	5.83462	5.77951	5.77439	5.70383	5.71444	5.67657	5.67329	5.63488	5.63848
0.74	5.88851	5.88327	5.82898	5.83458	5.78614	5.77434	5.72731	5.7144	5.67047	5.67325	5.62517	5.63845
0.741	5.8719	5.88326	5.82304	5.83454	5.77591	5.77428	5.7074	5.71436	5.66787	5.67322	5.63872	5.63843
0.742	5.87744	5.88324	5.84275	5.8345	5.77982	5.77423	5.72178	5.71431	5.67356	5.67318	5.63971	5.63841
0.743	5.889	5.88323	5.82108	5.83447	5.77972	5.77418	5.72168	5.71427	5.67826	5.67314	5.63144	5.63838
0.744	5.87428	5.88322	5.83799	5.83443	5.77117	5.77413	5.69581	5.71423	5.66927	5.6731	5.63303	5.63836
0.745	5.88178	5.8832	5.83708	5.83439	5.77862	5.77408	5.71895	5.71418	5.68335	5.67307	5.63314	5.63834
0.746	5.89795	5.88319	5.82717	5.83435	5.76741	5.77403	5.69923	5.71414	5.66439	5.67303	5.63905	5.63831
0.747	5.88849	5.88318	5.83419	5.83431	5.76751	5.77397	5.72824	5.7141	5.6713	5.67299	5.63546	5.63829
0.748	5.88307	5.88316	5.83586	5.83427	5.77224	5.77392	5.72148	5.71405	5.67152	5.67296	5.64141	5.63827
0.749	5.87444	5.88315	5.82101	5.83424	5.77412	5.77387	5.71366	5.71401	5.67512	5.67292	5.6352	5.63825
0.75	5.89222	5.88314	5.83941	5.8342	5.76642	5.77382	5.71648	5.71397	5.67161	5.67289	5.64734	5.63822
0.751	5.88402	5.88312	5.84153	5.83416	5.76635	5.77377	5.71065	5.71393	5.66498	5.67285	5.63785	5.6382
0.752	5.88205	5.88311	5.83696	5.83412	5.77677	5.77372	5.74257	5.71388	5.67798	5.67281	5.62914	5.63818
0.753	5.89404	5.8831	5.8306	5.83408	5.76638	5.77367	5.71805	5.71384	5.67387	5.67278	5.64231	5.63815
0.754	5.88152	5.88308	5.83476	5.83404	5.76543	5.77362	5.73463	5.7138	5.67849	5.67274	5.64061	5.63813
0.755	5.89414	5.88307	5.8419	5.83401	5.78418	5.77357	5.72002	5.71376	5.66251	5.6727	5.64316	5.63811
0.756	5.87955	5.88306	5.83971	5.83397	5.78217	5.77352	5.71567	5.71371	5.67843	5.67267	5.64561	5.63809
0.757	5.87334	5.88304	5.85063	5.83393	5.77916	5.77347	5.72426	5.71367	5.68083	5.67263	5.64455	5.63806
0.758	5.87677	5.88303	5.83716	5.83389	5.77617	5.77342	5.71548	5.71363	5.67995	5.6726	5.64164	5.63804
0.759	5.88812	5.88302	5.84294	5.83385	5.76918	5.77337	5.72384	5.71359	5.67568	5.67256	5.63309	5.63802
0.76	5.88177	5.883	5.81994	5.83382	5.77757	5.77332	5.7349	5.71355	5.68235	5.67253	5.64356	5.638
0.761	5.88484	5.88299	5.83533	5.83378	5.76947	5.77327	5.71539	5.7135	5.6674	5.67249	5.63962	5.63797
0.762	5.88622	5.88298	5.82933	5.83374	5.7679	5.77322	5.71833	5.71346	5.68407	5.67245	5.62977	5.63795
0.763	5.87923	5.88297	5.82341	5.8337	5.77085	5.77317	5.70741	5.71342	5.68477	5.67242	5.63707	5.63793
0.764	5.88309	5.88295	5.83142	5.83366	5.76473	5.77312	5.69296	5.71338	5.66794	5.67238	5.63686	5.63791
0.765	5.88058	5.88294	5.8271	5.83363	5.77716	5.77307	5.70871	5.71334	5.66651	5.67235	5.6456	5.63789
0.766	5.88876	5.88293	5.83974	5.83359	5.77925	5.77302	5.72009	5.7133	5.66789	5.67231	5.63738	5.63786
0.767	5.89311	5.88291	5.82842	5.83355	5.77696	5.77297	5.69814	5.71326	5.66249	5.67228	5.63367	5.63784
0.768	5.86864	5.8829	5.83979	5.83351	5.77697	5.77292	5.73276	5.71321	5.68172	5.67224	5.63308	5.63782
0.769	5.87295	5.88289	5.83635	5.83348	5.77903	5.77287	5.73267	5.71317	5.6734	5.67221	5.6337	5.6378
0.77	5.88747	5.88287	5.8213	5.83344	5.7754	5.77282	5.71725	5.71313	5.67831	5.67217	5.63746	5.63778
0.771	5.88781	5.88286	5.84212	5.8334	5.77841	5.77277	5.6941	5.71309	5.66606	5.67214	5.64086	5.63775
0.772	5.87137	5.88285	5.81933	5.83336	5.77905	5.77272	5.71467	5.71305	5.67279	5.6721	5.63553	5.63773
0.773	5.87243	5.88283	5.83443	5.83333	5.7646	5.77267	5.72381	5.71301	5.66613	5.67207	5.64338	5.63771
0.774	5.88847	5.88282	5.83614	5.83329	5.77783	5.77262	5.70295	5.71297	5.6695	5.67204	5.63705	5.63769
0.775	5.88851	5.88281	5.84912	5.83325	5.77921	5.77257	5.69629	5.71293	5.67182	5.672	5.63275	5.63767
0.776	5.88029	5.8828	5.83684	5.83321	5.77786	5.77252	5.70628	5.71289	5.66528	5.67197	5.6254	5.63765
0.777	5.8809	5.88278	5.83245	5.83318	5.77134	5.77247	5.70459	5.71285	5.66828	5.67193	5.63557	5.63762
0.778	5.87732	5.88277	5.83272	5.83314	5.76215	5.77242	5.71486	5.71281	5.67047	5.6719	5.64888	5.6376
0.779	5.88236	5.88276	5.82933	5.8331	5.76723	5.77237	5.70217	5.71277	5.6673	5.67186	5.64024	5.63758
0.78	5.88374	5.88274	5.84159	5.83306	5.78421	5.77233	5.71	5.71273	5.66749	5.67183	5.63951	5.63756
0.781	5.87581	5.88273	5.84457	5.83303	5.78542	5.77228	5.72138	5.71269	5.66549	5.6718	5.63954	5.63754
0.782	5.87834	5.88272	5.8333	5.83299	5.77179	5.77223	5.70981	5.71265	5.67427	5.67176	5.64627	5.63752
0.783	5.88237	5.8827	5.82481	5.83295	5.77813	5.77218	5.69656	5.71261	5.66832	5.67173	5.62568	5.6375
0.784	5.88757	5.88269	5.82941	5.83292	5.768	5.77213	5.71695	5.71257	5.67155	5.67169	5.63779	5.63747
0.785	5.89196	5.88268	5.83626	5.83288	5.76947	5.77208	5.73399	5.71253	5.66182	5.67166	5.63282	5.63745
0.786	5.88833	5.88267	5.83045	5.83284	5.77308	5.77203	5.71626	5.71249	5.67821	5.67163	5.63714	5.63743
0.787	5.88204	5.88265	5.83573	5.8328	5.78372	5.77199	5.72667	5.71245	5.67067	5.67159	5.64395	5.63741
0.788	5.8851	5.88264	5.83793	5.83277	5.76454	5.77194	5.72635	5.71241	5.67142	5.67156	5.63105	5.63739
0.789	5.88662	5.88263	5.8274	5.83273	5.77316	5.77189	5.69834	5.71237	5.6827	5.67153	5.64324	5.63737
0.79	5.88272	5.88261	5.83093	5.83269	5.76807	5.77184	5.71097	5.71233	5.68274	5.67149	5.64152	5.63735
0.791	5.87471	5.8826	5.83033	5.83266	5.78096	5.77179	5.71511	5.71229	5.67607	5.67146	5.65289	5.63733
0.792	5.87595	5.88259	5.83536	5.83262	5.77134	5.77175	5.71986	5.71225	5.67643	5.67143	5.63099	5.63731
0.793	5.88295	5.88258	5.83066	5.83258	5.76845	5.7717	5.70404	5.71221	5.66632	5.67139	5.65268	5.63729
0.794	5.8767	5.88256	5.81792	5.83255	5.78071	5.77165	5.71092	5.71217	5.67598	5.67136	5.64561	5.63727
0.795	5.87035	5.88255	5.84022	5.83251	5.77627	5.7716	5.72867	5.71214	5.68041	5.67133	5.63012	5.63724
0.796	5.88896	5.88254	5.84802	5.83247	5.76022	5.77155	5.71725	5.7121	5.67252	5.6713	5.62607	5.63722
0.797	5.88663	5.88252	5.82965	5.83244	5.77165	5.77151	5.70177	5.71206	5.67386	5.67126	5.64214	5.6372
0.798	5.88222	5.88251	5.83451	5.8324	5.77253	5.77146	5.69884	5.71202	5.67487	5.67123	5.63221	5.63718
0.799	5.87957	5.8825	5.84332	5.83236	5.76551	5.77141	5.70988	5.71198	5.67084	5.6712	5.64512	5.63716
0.8	5.88653	5.88249	5.83905	5.83232	5.78121	5.77136	5.69446	5.71194	5.68471	5.67116	5.63772	5.63714
0.801	5.87675	5.88247	5.82675	5.83229	5.76925	5.77132	5.70105	5.7119	5.682	5.67113	5.63859	5.63712
0.802	5.87717	5.88246	5.83344	5.83225	5.78157	5.77127	5.70222	5.71187	5.66684	5.6711	5.63697	5.6371
0.803	5.87888	5.88245	5.83248	5.83222	5.76599	5.77122	5.71839	5.71183	5.66069	5.67107	5.62878	5.63708
0.804	5.8852	5.88243	5.82774	5.83218	5.76815	5.77118	5.71039	5.71179	5.66914	5.67103	5.63818	5.63706
0.805	5.89325	5.88242	5.83102	5.83214	5.7729	5.77113	5.71378	5.71175	5.67176	5.671	5.6337	5.63704
0.806	5.8731	5.88241	5.83256	5.83211	5.76784	5.77108	5.71657	5.71171	5.66892	5.67097	5.63468	5.63702
0.807	5.88194	5.8824	5.83781	5.83207	5.7788	5.77104	5.72458	5.71167	5.66799	5.67094	5.63146	5.637
0.808	5.88909	5.88238	5.8317	5.83203	5.77392	5.77099	5.69984	5.71164	5.66073	5.67091	5.63819	5.63698
0.809	5.87957	5.88237	5.82596	5.832	5.7669	5.77094	5.71721	5.7116	5.65772	5.67087	5.63355	5.63696
0.81	5.88834	5.88236	5.82299	5.83196	5.77658	5.77089	5.71159	5.71156	5.67383	5.67084	5.63644	5.63694
0.811	5.8842	5.88235	5.82796	5.83192	5.77563	5.77085	5.694	5.71152	5.66682	5.67081	5.63572	5.63692
0.812	5.87805	5.88233	5.82691	5.83189	5.77943	5.7708	5.72461	5.71149	5.68449	5.67078	5.64145	5.6369
0.813	5.8906	5.88232	5.82669	5.83185	5.74968	5.77076	5.71537	5.71145	5.67657	5.67075	5.63613	5.63688
0.814	5.88458	5.88231	5.85027	5.83181	5.75274	5.77071	5.71656	5.71141	5.67118	5.67072	5.64234	5.63686
0.815	5.88428	5.88229	5.8289	5.83178	5.77056	5.77066	5.70978	5.71137	5.67616	5.67068	5.6337	5.63684
0.816	5.88378	5.88228	5.83487	5.83174	5.77355	5.77062	5.70241	5.71134	5.67448	5.67065	5.63892	5.63682
0.817	5.88506	5.88227	5.82748	5.83171	5.78127	5.77057	5.71116	5.7113	5.66933	5.67062	5.6388	5.6368
0.818	5.87894	5.88226	5.83978	5.83167	5.77888	5.77052	5.71834	5.71126	5.67639	5.67059	5.63716	5.63678
0.819	5.87939	5.88224	5.83578	5.83163	5.76812	5.77048	5.72139	5.71123	5.67035	5.67056	5.65252	5.63676
0.82	5.87715	5.88223	5.81956	5.8316	5.77405	5.77043	5.70946	5.71119	5.67098	5.67053	5.63823	5.63674
0.821	5.89127	5.88222	5.83795	5.83156	5.76471	5.77039	5.70425	5.71115	5.6664	5.6705	5.63653	5.63672
0.822	5.87967	5.88221	5.83217	5.83153	5.77407	5.77034	5.7166	5.71111	5.66504	5.67046	5.64734	5.6367
0.823	5.87779	5.88219	5.84077	5.83149	5.77699	5.77029	5.71071	5.71108	5.66975	5.67043	5.6445	5.63668
0.824	5.88244	5.88218	5.83281	5.83145	5.75796	5.77025	5.72597	5.71104	5.6722	5.6704	5.632	5.63666
0.825	5.88027	5.88217	5.82255	5.83142	5.78096	5.7702	5.72252	5.711	5.66718	5.67037	5.63815	5.63665
0.826	5.87622	5.88216	5.83147	5.83138	5.76717	5.77016	5.71706	5.71097	5.66227	5.67034	5.62894	5.63663
0.827	5.89516	5.88214	5.82931	5.83135	5.77483	5.77011	5.70168	5.71093	5.67259	5.67031	5.62759	5.63661
0.828	5.89332	5.88213	5.83965	5.83131	5.75403	5.77007	5.70537	5.7109	5.66187	5.67028	5.63222	5.63659
0.829	5.87161	5.88212	5.82859	5.83127	5.77244	5.77002	5.70453	5.71086	5.67553	5.67025	5.63694	5.63657
0.83	5.87673	5.8821	5.84511	5.83124	5.76768	5.76998	5.70321	5.71082	5.67707	5.67022	5.64267	5.63655
0.831	5.88146	5.88209	5.83819	5.8312	5.77262	5.76993	5.73506	5.71079	5.67472	5.67019	5.63568	5.63653
0.832	5.88646	5.88208	5.83287	5.83117	5.78244	5.76988	5.70971	5.71075	5.66446	5.67016	5.63564	5.63651
0.833	5.88488	5.88207	5.82255	5.83113	5.7685	5.76984	5.71457	5.71071	5.66849	5.67013	5.63328	5.63649
0.834	5.87566	5.88205	5.81671	5.8311	5.7664	5.76979	5.69304	5.71068	5.66418	5.6701	5.64205	5.63647
0.835	5.88822	5.88204	5.83441	5.83106	5.77244	5.76975	5.70779	5.71064	5.66402	5.67007	5.64848	5.63645
0.836	5.86943	5.88203	5.82997	5.83103	5.75273	5.7697	5.69816	5.71061	5.67976	5.67004	5.63907	5.63643
0.837	5.89294	5.88202	5.82592	5.83099	5.77319	5.76966	5.68851	5.71057	5.66468	5.67001	5.64637	5.63642
0.838	5.88935	5.882	5.84866	5.83095	5.77499	5.76961	5.71534	5.71054	5.67394	5.66998	5.63858	5.6364
0.839	5.89073	5.88199	5.8263	5.83092	5.77225	5.76957	5.71502	5.7105	5.67022	5.66995	5.64327	5.63638
0.84	5.87902	5.88198	5.82967	5.83088	5.76297	5.76953	5.71952	5.71046	5.66426	5.66992	5.64478	5.63636
0.841	5.87384	5.88197	5.83058	5.83085	5.75953	5.76948	5.71601	5.71043	5.6805	5.66989	5.63909	5.63634
0.842	5.87386	5.88195	5.83458	5.83081	5.77123	5.76944	5.70971	5.71039	5.67722	5.66986	5.63754	5.63632
0.843	5.88486	5.88194	5.84615	5.83078	5.75132	5.76939	5.7054	5.71036	5.67252	5.66983	5.62793	5.6363
0.844	5.88907	5.88193	5.83759	5.83074	5.77091	5.76935	5.71724	5.71032	5.65703	5.6698	5.63427	5.63628
0.845	5.8777	5.88192	5.8426	5.83071	5.75778	5.7693	5.70282	5.71029	5.67267	5.66977	5.63571	5.63626
0.846	5.87065	5.8819	5.81769	5.83067	5.7647	5.76926	5.70681	5.71025	5.6723	5.66974	5.63551	5.63625
0.847	5.8889	5.88189	5.83271	5.83064	5.78708	5.76921	5.71301	5.71022	5.66894	5.66971	5.64168	5.63623
0.848	5.88978	5.88188	5.82191	5.8306	5.75777	5.76917	5.70662	5.71018	5.66484	5.66968	5.64415	5.63621
0.849	5.8854	5.88187	5.81699	5.83057	5.77653	5.76913	5.71107	5.71015	5.66394	5.66965	5.63745	5.63619
0.85	5.87635	5.88185	5.8419	5.83053	5.75355	5.76908	5.70897	5.71011	5.67123	5.66962	5.64	5.63617
0.851	5.88716	5.88184	5.83374	5.8305	5.76253	5.76904	5.73208	5.71008	5.67652	5.66959	5.62319	5.63615
0.852	5.88474	5.88183	5.84024	5.83046	5.76813	5.76899	5.70586	5.71004	5.668	5.66956	5.64858	5.63614
0.853	5.87222	5.88182	5.82293	5.83042	5.76165	5.76895	5.69328	5.71001	5.6765	5.66953	5.63864	5.63612
0.854	5.87692	5.8818	5.8156	5.83039	5.77805	5.76891	5.70272	5.70998	5.66007	5.6695	5.62918	5.6361
0.855	5.89296	5.88179	5.82585	5.83036	5.77599	5.76886	5.69787	5.70994	5.67424	5.66947	5.63011	5.63608
0.856	5.88213	5.88178	5.82813	5.83032	5.77649	5.76882	5.70428	5.70991	5.67142	5.66944	5.63515	5.63606
0.857	5.88647	5.88177	5.82642	5.83029	5.77313	5.76877	5.69881	5.70987	5.67723	5.66941	5.64344	5.63604
0.858	5.89446	5.88175	5.83546	5.83025	5.77278	5.76873	5.72469	5.70984	5.67759	5.66939	5.63325	5.63603
0.859	5.87913	5.88174	5.82784	5.83021	5.77885	5.76869	5.70209	5.7098	5.67822	5.66936	5.63774	5.63601
0.86	5.87388	5.88173	5.81627	5.83018	5.77141	5.76864	5.71456	5.70977	5.66604	5.66933	5.62488	5.63599
0.861	5.88181	5.88172	5.82297	5.83015	5.76761	5.7686	5.71667	5.70974	5.67561	5.6693	5.63116	5.63597
0.862	5.87582	5.88171	5.84001	5.83011	5.7656	5.76856	5.72171	5.7097	5.6705	5.66927	5.65249	5.63595
0.863	5.87702	5.88169	5.82365	5.83008	5.77884	5.76851	5.7132	5.70967	5.67197	5.66924	5.62992	5.63594
0.864	5.89354	5.88168	5.8274	5.83004	5.77351	5.76847	5.70604	5.70963	5.67429	5.66921	5.63827	5.63592
0.865	5.89011	5.88167	5.81894	5.83001	5.77221	5.76843	5.71403	5.7096	5.66492	5.66918	5.64186	5.6359
0.866	5.86717	5.88166	5.83014	5.82997	5.76211	5.76839	5.70429	5.70957	5.66719	5.66916	5.62393	5.63588
0.867	5.87661	5.88164	5.83527	5.82994	5.77631	5.76834	5.71445	5.70953	5.65668	5.66913	5.63339	5.63586
0.868	5.87634	5.88163	5.82317	5.8299	5.77134	5.7683	5.69729	5.7095	5.65973	5.6691	5.63116	5.63585
0.869	5.87709	5.88162	5.82525	5.82987	5.76536	5.76826	5.71261	5.70947	5.66575	5.66907	5.63326	5.63583
0.87	5.88186	5.88161	5.83044	5.82983	5.76968	5.76821	5.71928	5.70943	5.66536	5.66904	5.6278	5.63581
0.871	5.89408	5.88159	5.83755	5.8298	5.76132	5.76817	5.72082	5.7094	5.66689	5.66902	5.63752	5.63579
0.872	5.88368	5.88158	5.82942	5.82976	5.74932	5.76813	5.71633	5.70937	5.66667	5.66899	5.62871	5.63577
0.873	5.88184	5.88157	5.83054	5.82973	5.75499	5.76809	5.71683	5.70933	5.67352	5.66896	5.62757	5.63576
0.874	5.87608	5.88156	5.82448	5.8297	5.75962	5.76804	5.71496	5.7093	5.67699	5.66893	5.63892	5.63574
0.875	5.88002	5.88155	5.8329	5.82966	5.7755	5.768	5.72352	5.70927	5.67	5.6689	5.63744	5.63572
0.876	5.87413	5.88153	5.83017	5.82963	5.77243	5.76796	5.70927	5.70923	5.66356	5.66887	5.63279	5.6357
0.877	5.87907	5.88152	5.8291	5.82959	5.77136	5.76792	5.70803	5.7092	5.66015	5.66885	5.62945	5.63569
0.878	5.8718	5.88151	5.83222	5.82956	5.77184	5.76787	5.69871	5.70917	5.6776	5.66882	5.64645	5.63567
0.879	5.88065	5.8815	5.82158	5.82952	5.76582	5.76783	5.70863	5.70913	5.66316	5.66879	5.63481	5.63565
0.88	5.88193	5.88148	5.82613	5.82949	5.77149	5.76779	5.70435	5.7091	5.66863	5.66876	5.63407	5.63563
0.881	5.88	5.88147	5.82861	5.82945	5.77741	5.76775	5.71786	5.70907	5.68144	5.66874	5.63935	5.63562
0.882	5.86961	5.88146	5.83053	5.82942	5.77237	5.7677	5.70887	5.70904	5.67174	5.66871	5.63952	5.6356
0.883	5.86969	5.88145	5.81936	5.82939	5.77636	5.76766	5.69398	5.709	5.67371	5.66868	5.63498	5.63558
0.884	5.87661	5.88144	5.84634	5.82935	5.77084	5.76762	5.71393	5.70897	5.67875	5.66865	5.63539	5.63556
0.885	5.87142	5.88142	5.82688	5.82932	5.78243	5.76758	5.71044	5.70894	5.66913	5.66863	5.63176	5.63555
0.886	5.87909	5.88141	5.82441	5.82928	5.75647	5.76754	5.71683	5.70891	5.67359	5.6686	5.63988	5.63553
0.887	5.88568	5.8814	5.83407	5.82925	5.75782	5.7675	5.697	5.70887	5.67388	5.66857	5.64224	5.63551
0.888	5.88431	5.88139	5.82782	5.82922	5.78021	5.76745	5.70366	5.70884	5.65895	5.66854	5.63507	5.63549
0.889	5.88656	5.88137	5.83444	5.82918	5.77468	5.76741	5.70785	5.70881	5.66635	5.66852	5.63646	5.63548
0.89	5.89022	5.88136	5.82548	5.82915	5.76898	5.76737	5.69993	5.70878	5.66728	5.66849	5.63398	5.63546
0.891	5.87117	5.88135	5.82362	5.82911	5.75485	5.76733	5.72346	5.70875	5.67069	5.66846	5.64001	5.63544
0.892	5.88421	5.88134	5.8377	5.82908	5.78032	5.76729	5.69951	5.70871	5.67109	5.66844	5.64569	5.63543
0.893	5.88469	5.88133	5.81523	5.82905	5.76872	5.76725	5.70151	5.70868	5.65553	5.66841	5.64051	5.63541
0.894	5.87406	5.88131	5.83375	5.82901	5.76424	5.76721	5.70872	5.70865	5.66967	5.66838	5.62067	5.63539
0.895	5.89023	5.8813	5.83218	5.82898	5.77826	5.76716	5.71164	5.70862	5.67056	5.66835	5.63227	5.63537
0.896	5.87415	5.88129	5.83637	5.82894	5.77359	5.76712	5.70394	5.70859	5.66023	5.66833	5.64222	5.63536
0.897	5.88123	5.88128	5.82967	5.82891	5.7543	5.76708	5.70158	5.70855	5.65976	5.6683	5.63293	5.63534
0.898	5.88214	5.88127	5.83227	5.82888	5.77028	5.76704	5.68945	5.70852	5.67507	5.66827	5.63546	5.63532
0.899	5.88537	5.88125	5.82342	5.82884	5.77148	5.767	5.7191	5.70849	5.67842	5.66825	5.63208	5.63531
0.9	5.88759	5.88124	5.8257	5.82881	5.77934	5.76696	5.72484	5.70846	5.67295	5.66822	5.63776	5.63529
0.901	5.88326	5.88123	5.83815	5.82878	5.75542	5.76692	5.68652	5.70843	5.67233	5.66819	5.63398	5.63527
0.902	5.87627	5.88122	5.82488	5.82874	5.77015	5.76688	5.7059	5.7084	5.67631	5.66817	5.63417	5.63526
0.903	5.87004	5.8812	5.83224	5.82871	5.77117	5.76684	5.71654	5.70837	5.67163	5.66814	5.62396	5.63524
0.904	5.87661	5.88119	5.82699	5.82867	5.7564	5.7668	5.70253	5.70833	5.67354	5.66811	5.63856	5.63522
0.905	5.88369	5.88118	5.83101	5.82864	5.75629	5.76675	5.69513	5.7083	5.66041	5.66809	5.63284	5.6352
0.906	5.87971	5.88117	5.83263	5.82861	5.76741	5.76671	5.70274	5.70827	5.66894	5.66806	5.6523	5.63519
0.907	5.88239	5.88116	5.8311	5.82857	5.76474	5.76667	5.70953	5.70824	5.66539	5.66804	5.63993	5.63517
0.908	5.86588	5.88114	5.8374	5.82854	5.77177	5.76663	5.70938	5.70821	5.66869	5.66801	5.63463	5.63515
0.909	5.88868	5.88113	5.83852	5.82851	5.76016	5.76659	5.70592	5.70818	5.67096	5.66798	5.63395	5.63514
0.91	5.8836	5.88112	5.83266	5.82847	5.75769	5.76655	5.69996	5.70815	5.67191	5.66796	5.62411	5.63512
0.911	5.88631	5.88111	5.83369	5.82844	5.7636	5.76651	5.70918	5.70812	5.67322	5.66793	5.64082	5.6351
0.912	5.89165	5.8811	5.82094	5.82841	5.75934	5.76647	5.71195	5.70809	5.66757	5.6679	5.63293	5.63509
0.913	5.88772	5.88108	5.83907	5.82837	5.7723	5.76643	5.71939	5.70806	5.65909	5.66788	5.63705	5.63507
0.914	5.89142	5.88107	5.8316	5.82834	5.7757	5.76639	5.70511	5.70803	5.67511	5.66785	5.63232	5.63505
0.915	5.8798	5.88106	5.82265	5.82831	5.76188	5.76635	5.71126	5.70799	5.66587	5.66783	5.63354	5.63504
0.916	5.87233	5.88105	5.83641	5.82827	5.7654	5.76631	5.70839	5.70796	5.66803	5.6678	5.64479	5.63502
0.917	5.87837	5.88104	5.82135	5.82824	5.76695	5.76627	5.71197	5.70793	5.67083	5.66777	5.63626	5.63501
0.918	5.88001	5.88102	5.82839	5.82821	5.77315	5.76623	5.71384	5.7079	5.67577	5.66775	5.63137	5.63499
0.919	5.89289	5.88101	5.81542	5.82817	5.77179	5.76619	5.7217	5.70787	5.66645	5.66772	5.63317	5.63497
0.92	5.88148	5.881	5.82413	5.82814	5.76617	5.76615	5.71827	5.70784	5.67909	5.6677	5.64224	5.63496
0.921	5.87921	5.88099	5.8353	5.82811	5.76178	5.76611	5.71248	5.70781	5.66104	5.66767	5.64367	5.63494
0.922	5.87397	5.88098	5.81697	5.82807	5.7559	5.76607	5.71753	5.70778	5.66375	5.66765	5.63813	5.63492
0.923	5.88383	5.88096	5.83259	5.82804	5.76453	5.76603	5.69051	5.70775	5.65821	5.66762	5.62801	5.63491
0.924	5.8813	5.88095	5.82507	5.82801	5.7673	5.76599	5.69738	5.70772	5.66459	5.6676	5.64153	5.63489
0.925	5.87275	5.88094	5.83745	5.82798	5.76241	5.76595	5.71656	5.70769	5.67405	5.66757	5.64129	5.63487
0.926	5.8834	5.88093	5.83735	5.82794	5.75702	5.76591	5.72148	5.70766	5.67634	5.66754	5.64009	5.63486
0.927	5.87932	5.88092	5.84065	5.82791	5.76861	5.76587	5.69788	5.70763	5.66009	5.66752	5.63699	5.63484
0.928	5.8771	5.88091	5.83003	5.82788	5.77011	5.76583	5.70602	5.7076	5.67492	5.66749	5.63388	5.63483
0.929	5.88689	5.88089	5.81853	5.82784	5.76067	5.76579	5.71121	5.70757	5.67032	5.66747	5.63224	5.63481
0.93	5.89022	5.88088	5.82845	5.82781	5.76412	5.76576	5.71857	5.70754	5.66868	5.66744	5.63697	5.63479
0.931	5.87897	5.88087	5.83655	5.82778	5.76614	5.76572	5.70505	5.70751	5.65528	5.66742	5.63925	5.63478
0.932	5.86806	5.88086	5.8247	5.82774	5.77068	5.76568	5.71216	5.70748	5.66432	5.66739	5.63192	5.63476
0.933	5.88152	5.88085	5.82553	5.82771	5.78164	5.76564	5.70782	5.70745	5.66502	5.66737	5.63281	5.63474
0.934	5.87806	5.88083	5.83258	5.82768	5.77406	5.7656	5.71239	5.70742	5.65934	5.66734	5.63384	5.63473
0.935	5.87704	5.88082	5.81296	5.82765	5.77013	5.76556	5.68342	5.7074	5.66279	5.66732	5.63917	5.63471
0.936	5.8825	5.88081	5.82405	5.82761	5.77263	5.76552	5.70572	5.70737	5.66834	5.66729	5.62926	5.6347
0.937	5.88899	5.8808	5.81245	5.82758	5.77042	5.76548	5.72929	5.70734	5.66325	5.66727	5.64468	5.63468
0.938	5.88064	5.88079	5.82736	5.82755	5.76898	5.76544	5.70818	5.70731	5.67069	5.66724	5.64427	5.63467
0.939	5.87558	5.88077	5.82761	5.82752	5.76743	5.7654	5.69684	5.70728	5.66923	5.66722	5.62913	5.63465
0.94	5.89102	5.88076	5.83601	5.82748	5.76385	5.76537	5.71674	5.70725	5.673	5.66719	5.63922	5.63463
0.941	5.87984	5.88075	5.82126	5.82745	5.77403	5.76533	5.70175	5.70722	5.66447	5.66717	5.6307	5.63462
0.942	5.88602	5.88074	5.8313	5.82742	5.76617	5.76529	5.69971	5.70719	5.66408	5.66714	5.62477	5.6346
0.943	5.89401	5.88073	5.82232	5.82739	5.77975	5.76525	5.70527	5.70716	5.67599	5.66712	5.63566	5.63459
0.944	5.87194	5.88072	5.82139	5.82735	5.76397	5.76521	5.70678	5.70713	5.66654	5.66709	5.62521	5.63457
0.945	5.89669	5.8807	5.81965	5.82732	5.77954	5.76517	5.69951	5.7071	5.66099	5.66707	5.64134	5.63455
0.946	5.87699	5.88069	5.82578	5.82729	5.76011	5.76514	5.70101	5.70708	5.65936	5.66705	5.63563	5.63454
0.947	5.88032	5.88068	5.81974	5.82726	5.76384	5.7651	5.7039	5.70705	5.67542	5.66702	5.63189	5.63452
0.948	5.897	5.88067	5.82062	5.82722	5.75869	5.76506	5.70305	5.70702	5.67409	5.667	5.62785	5.63451
0.949	5.88647	5.88066	5.83305	5.82719	5.7554	5.76502	5.70939	5.70699	5.66933	5.66697	5.6311	5.63449
0.95	5.88763	5.88064	5.82897	5.82716	5.77548	5.76498	5.71575	5.70696	5.66688	5.66695	5.63491	5.63448
0.951	5.87412	5.88063	5.82504	5.82713	5.7603	5.76494	5.70945	5.70693	5.6712	5.66692	5.63045	5.63446
0.952	5.87795	5.88062	5.8093	5.82709	5.77288	5.76491	5.70485	5.7069	5.6813	5.6669	5.63906	5.63444
0.953	5.88418	5.88061	5.82407	5.82706	5.76848	5.76487	5.69375	5.70687	5.66609	5.66688	5.63049	5.63443
0.954	5.88283	5.8806	5.82076	5.82703	5.76443	5.76483	5.69769	5.70685	5.67287	5.66685	5.63702	5.63441
0.955	5.88941	5.88059	5.82626	5.827	5.76767	5.76479	5.69002	5.70682	5.66675	5.66683	5.63378	5.6344
0.956	5.8661	5.88057	5.82981	5.82696	5.77387	5.76475	5.70195	5.70679	5.66242	5.6668	5.62901	5.63438
0.957	5.87357	5.88056	5.83014	5.82693	5.75821	5.76472	5.69821	5.70676	5.67154	5.66678	5.6355	5.63437
0.958	5.87275	5.88055	5.83417	5.8269	5.76273	5.76468	5.70946	5.70673	5.66767	5.66675	5.64017	5.63435
0.959	5.8644	5.88054	5.83778	5.82687	5.76198	5.76464	5.71733	5.7067	5.66108	5.66673	5.63682	5.63434
0.96	5.87927	5.88053	5.82534	5.82684	5.76495	5.7646	5.69948	5.70668	5.66964	5.66671	5.63277	5.63432
0.961	5.86726	5.88052	5.83029	5.8268	5.75503	5.76457	5.70108	5.70665	5.65897	5.66668	5.64105	5.6343
0.962	5.86658	5.8805	5.82233	5.82677	5.76694	5.76453	5.6998	5.70662	5.66857	5.66666	5.62739	5.63429
0.963	5.88529	5.88049	5.82989	5.82674	5.7616	5.76449	5.69615	5.70659	5.67796	5.66664	5.63789	5.63427
0.964	5.87871	5.88048	5.82078	5.82671	5.76572	5.76445	5.68869	5.70657	5.65861	5.66661	5.62543	5.63426
0.965	5.88093	5.88047	5.83098	5.82668	5.76799	5.76442	5.7098	5.70654	5.67089	5.66659	5.62851	5.63424
0.966	5.87885	5.88046	5.82955	5.82664	5.76973	5.76438	5.7081	5.70651	5.66046	5.66656	5.63622	5.63423
0.967	5.87389	5.88045	5.82116	5.82661	5.77596	5.76434	5.70995	5.70648	5.66502	5.66654	5.64637	5.63421
0.968	5.8873	5.88043	5.82541	5.82658	5.76363	5.7643	5.71251	5.70645	5.66057	5.66652	5.63882	5.6342
0.969	5.87926	5.88042	5.82381	5.82655	5.75047	5.76427	5.71062	5.70643	5.66083	5.66649	5.634	5.63418
0.97	5.8808	5.88041	5.83348	5.82652	5.76537	5.76423	5.70021	5.7064	5.65773	5.66647	5.63291	5.63417
0.971	5.8837	5.8804	5.82105	5.82649	5.75812	5.76419	5.72346	5.70637	5.66122	5.66645	5.63616	5.63415
0.972	5.87321	5.88039	5.83982	5.82645	5.75363	5.76416	5.71391	5.70634	5.66377	5.66642	5.64191	5.63414
0.973	5.87673	5.88038	5.8339	5.82642	5.76897	5.76412	5.69993	5.70632	5.66594	5.6664	5.63563	5.63412
0.974	5.88197	5.88036	5.81591	5.82639	5.76665	5.76408	5.69126	5.70629	5.67026	5.66638	5.62552	5.6341
0.975	5.8881	5.88035	5.82693	5.82636	5.77344	5.76405	5.7084	5.70626	5.66422	5.66635	5.63041	5.63409
0.976	5.86946	5.88034	5.83231	5.82633	5.76456	5.76401	5.71124	5.70623	5.66651	5.66633	5.62841	5.63407
0.977	5.87236	5.88033	5.82094	5.82629	5.75997	5.76397	5.73114	5.70621	5.67608	5.66631	5.63076	5.63406
0.978	5.89001	5.88032	5.82117	5.82626	5.76557	5.76394	5.71797	5.70618	5.66338	5.66628	5.64939	5.63404
0.979	5.89011	5.88031	5.82845	5.82623	5.76358	5.7639	5.69562	5.70615	5.67087	5.66626	5.62685	5.63403
0.98	5.8808	5.8803	5.81924	5.8262	5.75776	5.76386	5.70205	5.70613	5.67243	5.66624	5.63195	5.63401
0.981	5.88206	5.88028	5.82313	5.82617	5.75914	5.76383	5.68832	5.7061	5.66792	5.66621	5.6326	5.634
0.982	5.86796	5.88027	5.82346	5.82614	5.76251	5.76379	5.68634	5.70607	5.66288	5.66619	5.64114	5.63398
0.983	5.88144	5.88026	5.82292	5.82611	5.76516	5.76375	5.69986	5.70605	5.66188	5.66617	5.6302	5.63397
0.984	5.88141	5.88025	5.81963	5.82607	5.75462	5.76372	5.71161	5.70602	5.65788	5.66614	5.63746	5.63395
0.985	5.88456	5.88024	5.81945	5.82604	5.76281	5.76368	5.70593	5.70599	5.66506	5.66612	5.63141	5.63394
0.986	5.88189	5.88023	5.82134	5.82601	5.76988	5.76364	5.70718	5.70596	5.65882	5.6661	5.62879	5.63392
0.987	5.88682	5.88021	5.8315	5.82598	5.75871	5.76361	5.70433	5.70594	5.66336	5.66608	5.62411	5.63391
0.988	5.88753	5.8802	5.83057	5.82595	5.74792	5.76357	5.7119	5.70591	5.66289	5.66605	5.63639	5.63389
0.989	5.87689	5.88019	5.82583	5.82592	5.77172	5.76354	5.68146	5.70589	5.66599	5.66603	5.62743	5.63388
0.99	5.8824	5.88018	5.81161	5.82589	5.75272	5.7635	5.68986	5.70586	5.6691	5.66601	5.62763	5.63387
0.991	5.88901	5.88017	5.83105	5.82585	5.76622	5.76346	5.70085	5.70583	5.667	5.66598	5.63101	5.63385
0.992	5.88443	5.88016	5.82672	5.82582	5.76347	5.76343	5.69404	5.70581	5.66649	5.66596	5.64377	5.63384
0.993	5.87206	5.88015	5.82384	5.82579	5.75136	5.76339	5.70698	5.70578	5.65949	5.66594	5.63433	5.63382
0.994	5.88563	5.88013	5.81564	5.82576	5.77433	5.76336	5.7119	5.70575	5.66584	5.66592	5.63152	5.63381
0.995	5.87871	5.88012	5.82211	5.82573	5.75869	5.76332	5.70736	5.70573	5.67214	5.66589	5.63221	5.63379
0.996	5.8847	5.88011	5.83173	5.8257	5.75917	5.76328	5.69084	5.7057	5.66471	5.66587	5.62971	5.63378
0.997	5.88133	5.8801	5.83029	5.82567	5.76137	5.76325	5.69195	5.70567	5.67518	5.66585	5.62213	5.63376
0.998	5.87091	5.88009	5.82968	5.82564	5.7793	5.76321	5.71659	5.70565	5.67244	5.66583	5.62921	5.63375
0.999	5.87857	5.88008	5.82322	5.82561	5.76464	5.76318	5.71783	5.70562	5.67323	5.6658	5.63533	5.63373
1	5.86637	5.88007	5.82733	5.82557	5.76078	5.76314	5.70135	5.7056	5.66416	5.66578	5.63957	5.63372
1.05	5.87836	5.8795	5.82328	5.82405	5.76381	5.76143	5.70751	5.70435	5.66227	5.66471	5.63315	5.633
1.1	5.87641	5.87896	5.82197	5.8226	5.76302	5.75983	5.7049	5.70321	5.66272	5.66371	5.63083	5.63233
1.15	5.87509	5.87843	5.82137	5.82119	5.75946	5.75833	5.70377	5.70216	5.66216	5.66278	5.63049	5.63168
1.2	5.875	5.87791	5.8221	5.81985	5.76094	5.75693	5.70525	5.7012	5.66182	5.66191	5.63023	5.63106
1.25	5.87564	5.87741	5.82026	5.81856	5.75682	5.75563	5.70319	5.70031	5.65908	5.66108	5.62945	5.63046
1.3	5.8746	5.87692	5.81824	5.81731	5.75742	5.7544	5.69885	5.69948	5.65944	5.6603	5.63055	5.62988
1.35	5.87604	5.87645	5.81631	5.81612	5.75643	5.75325	5.70282	5.69871	5.65761	5.65956	5.62763	5.62932
1.4	5.87386	5.87599	5.81817	5.81497	5.75264	5.75217	5.69858	5.69799	5.65687	5.65885	5.62734	5.62876
1.45	5.8744	5.87554	5.81444	5.81387	5.75338	5.75116	5.69674	5.69731	5.65726	5.65817	5.62576	5.62823
1.5	5.87433	5.87511	5.81346	5.81281	5.75239	5.75021	5.69823	5.69668	5.65673	5.65751	5.62675	5.6277
1.55	5.87292	5.87468	5.81217	5.81179	5.75274	5.74931	5.69864	5.69608	5.65654	5.65688	5.6255	5.62718
1.6	5.87211	5.87427	5.81117	5.8108	5.75033	5.74846	5.69407	5.69551	5.65507	5.65627	5.62406	5.62668
1.65	5.86968	5.87387	5.80966	5.80985	5.75014	5.74766	5.69505	5.69497	5.654	5.65568	5.62381	5.62618
1.7	5.87289	5.87349	5.80812	5.80894	5.7496	5.74691	5.69746	5.69445	5.65379	5.6551	5.62319	5.62569
1.75	5.87282	5.87311	5.80832	5.80806	5.748	5.74619	5.69452	5.69396	5.65187	5.65454	5.62245	5.62521
1.8	5.8716	5.87275	5.81009	5.80721	5.74831	5.74551	5.69206	5.69348	5.65127	5.654	5.62254	5.62473
1.85	5.8702	5.87239	5.80842	5.8064	5.74804	5.74487	5.69395	5.69303	5.65176	5.65346	5.62012	5.62427
1.9	5.87116	5.87204	5.80634	5.80561	5.74594	5.74425	5.69	5.69259	5.65112	5.65294	5.61938	5.62381
1.95	5.87159	5.87171	5.8076	5.80485	5.74612	5.74367	5.69092	5.69217	5.65152	5.65243	5.62218	5.62336
2	5.86945	5.87138	5.80457	5.80411	5.7456	5.74311	5.68985	5.69176	5.65062	5.65193	5.62027	5.62291
2.05	5.86935	5.87106	5.80413	5.8034	5.743	5.74258	5.68765	5.69136	5.64995	5.65145	5.62053	5.62248
2.1	5.86762	5.87076	5.8024	5.80272	5.74575	5.74207	5.69019	5.69097	5.65082	5.65097	5.6202	5.62204
2.15	5.86805	5.87046	5.80507	5.80206	5.74506	5.74159	5.6901	5.6906	5.6485	5.6505	5.61808	5.62162
2.2	5.86899	5.87017	5.80296	5.80142	5.74334	5.74112	5.68897	5.69023	5.64684	5.65004	5.61914	5.6212
2.25	5.86943	5.86988	5.80233	5.8008	5.74153	5.74067	5.68937	5.68987	5.6483	5.64959	5.61883	5.62079
2.3	5.86822	5.86961	5.80253	5.8002	5.74298	5.74024	5.68693	5.68952	5.64829	5.64914	5.61696	5.62038
2.35	5.86864	5.86934	5.80135	5.79962	5.74047	5.73982	5.68579	5.68918	5.64844	5.64871	5.61547	5.61998
2.4	5.86719	5.86908	5.80113	5.79906	5.74243	5.73942	5.68829	5.68884	5.64603	5.64828	5.61594	5.61959
2.45	5.87114	5.86883	5.79941	5.79851	5.7415	5.73904	5.68943	5.68851	5.64552	5.64786	5.6166	5.6192
2.5	5.86847	5.86858	5.79981	5.79798	5.74	5.73867	5.68669	5.68819	5.64567	5.64745	5.61572	5.61882
2.55	5.86742	5.86834	5.8001	5.79747	5.73839	5.7383	5.6874	5.68787	5.64418	5.64704	5.61445	5.61844
2.6	5.86927	5.86811	5.79885	5.79698	5.74014	5.73795	5.68459	5.68756	5.6455	5.64665	5.61555	5.61807
2.65	5.86692	5.86788	5.79843	5.79649	5.73849	5.73761	5.68597	5.68725	5.64491	5.64626	5.61436	5.61771
2.7	5.86695	5.86766	5.79854	5.79603	5.73967	5.73729	5.68685	5.68694	5.64435	5.64587	5.61305	5.61735
2.75	5.86578	5.86745	5.79713	5.79557	5.73938	5.73696	5.68576	5.68665	5.64465	5.64549	5.61355	5.61699
2.8	5.86648	5.86724	5.79701	5.79513	5.7376	5.73665	5.68182	5.68635	5.64341	5.64512	5.61467	5.61664
2.85	5.86575	5.86704	5.7965	5.7947	5.73976	5.73635	5.68481	5.68606	5.64316	5.64476	5.61349	5.6163
2.9	5.8653	5.86684	5.79393	5.79429	5.73662	5.73605	5.68195	5.68578	5.64323	5.6444	5.61225	5.61596
2.95	5.8644	5.86665	5.79511	5.79388	5.73716	5.73576	5.68424	5.6855	5.64356	5.64404	5.61244	5.61562
3	5.86741	5.86647	5.79428	5.79349	5.73689	5.73548	5.68556	5.68522	5.64243	5.6437	5.61329	5.61529
3.05	5.86461	5.86629	5.79308	5.7931	5.73725	5.7352	5.68396	5.68495	5.64189	5.64335	5.61268	5.61497
3.1	5.86557	5.86611	5.79308	5.79273	5.73534	5.73493	5.68306	5.68467	5.64182	5.64302	5.61144	5.61465
3.15	5.86475	5.86594	5.79502	5.79236	5.73466	5.73467	5.68152	5.68441	5.64289	5.64269	5.6115	5.61433
3.2	5.86463	5.86578	5.7923	5.79201	5.73334	5.73441	5.67998	5.68414	5.64151	5.64236	5.60967	5.61402
3.25	5.86485	5.86561	5.79167	5.79166	5.73303	5.73416	5.68193	5.68388	5.64306	5.64204	5.61047	5.61372
3.3	5.86647	5.86546	5.79222	5.79132	5.7342	5.73391	5.68319	5.68363	5.64358	5.64173	5.60951	5.61341
3.35	5.86583	5.8653	5.7927	5.79099	5.73264	5.73366	5.68102	5.68337	5.63916	5.64142	5.60953	5.61312
3.4	5.86378	5.86515	5.79056	5.79067	5.73371	5.73342	5.68126	5.68312	5.63988	5.64112	5.61	5.61283
3.45	5.86393	5.86501	5.79056	5.79035	5.73274	5.73318	5.67994	5.68287	5.63888	5.64082	5.60956	5.61254
3.5	5.86412	5.86487	5.79148	5.79004	5.73363	5.73295	5.68272	5.68263	5.64096	5.64052	5.60971	5.61225
3.55	5.866	5.86473	5.79163	5.78974	5.73189	5.73272	5.68146	5.68239	5.63755	5.64023	5.61028	5.61197
3.6	5.86432	5.8646	5.78882	5.78945	5.73199	5.7325	5.67845	5.68215	5.63725	5.63995	5.61026	5.6117
3.65	5.86376	5.86447	5.78983	5.78916	5.73087	5.73228	5.6813	5.68191	5.63922	5.63967	5.60861	5.61143
3.7	5.86557	5.86434	5.78922	5.78887	5.73005	5.73206	5.67955	5.68168	5.63692	5.6394	5.60955	5.61116
3.75	5.86411	5.86422	5.79028	5.7886	5.73142	5.73184	5.67993	5.68145	5.63779	5.63913	5.60911	5.61089
3.8	5.86402	5.8641	5.78878	5.78833	5.73041	5.73163	5.67913	5.68122	5.63764	5.63886	5.60842	5.61063
3.85	5.86356	5.86398	5.78724	5.78806	5.72893	5.73142	5.67759	5.68099	5.63621	5.6386	5.60907	5.61038
3.9	5.86414	5.86387	5.79002	5.7878	5.7287	5.73121	5.67715	5.68077	5.63667	5.63834	5.60685	5.61013
3.95	5.86405	5.86376	5.7904	5.78754	5.72866	5.73101	5.67848	5.68055	5.63619	5.63809	5.60923	5.60988
4	5.86393	5.86365	5.78894	5.78729	5.73073	5.73081	5.68008	5.68033	5.63726	5.63784	5.60859	5.60963
4.05	5.86275	5.86355	5.78685	5.78705	5.72952	5.73061	5.67827	5.68011	5.6372	5.6376	5.6083	5.60939
4.1	5.86334	5.86344	5.78822	5.78681	5.72934	5.73041	5.67875	5.6799	5.63555	5.63735	5.60744	5.60915
4.15	5.86471	5.86335	5.78818	5.78657	5.72916	5.73022	5.68015	5.67969	5.63618	5.63712	5.60723	5.60892
4.2	5.8638	5.86325	5.78586	5.78634	5.72856	5.73003	5.67987	5.67948	5.63612	5.63689	5.6064	5.60869
4.25	5.86384	5.86315	5.78775	5.78611	5.73021	5.72984	5.67723	5.67927	5.63631	5.63666	5.60625	5.60846
4.3	5.86218	5.86306	5.78796	5.78588	5.72782	5.72965	5.67435	5.67907	5.63541	5.63643	5.60597	5.60824
4.35	5.86223	5.86297	5.78471	5.78566	5.72801	5.72946	5.67719	5.67887	5.63618	5.63621	5.60767	5.60802
4.4	5.86343	5.86289	5.78493	5.78544	5.72694	5.72928	5.67647	5.67867	5.63382	5.63599	5.60574	5.6078
4.45	5.86178	5.8628	5.78632	5.78523	5.72755	5.7291	5.67953	5.67847	5.63456	5.63578	5.60711	5.60758
4.5	5.86293	5.86272	5.78409	5.78502	5.72805	5.72892	5.67412	5.67828	5.63404	5.63557	5.60497	5.60737
4.55	5.86084	5.86264	5.78429	5.78481	5.72586	5.72874	5.67808	5.67809	5.63259	5.63536	5.60487	5.60716
4.6	5.86171	5.86256	5.78533	5.7846	5.72707	5.72857	5.67629	5.6779	5.6345	5.63516	5.60537	5.60696
4.65	5.86095	5.86248	5.78338	5.7844	5.72697	5.72839	5.67438	5.67771	5.63498	5.63496	5.60476	5.60676
4.7	5.8636	5.86241	5.78436	5.7842	5.72604	5.72822	5.67484	5.67752	5.6332	5.63476	5.6049	5.60656
4.75	5.86181	5.86234	5.78406	5.78401	5.7257	5.72805	5.67677	5.67734	5.63268	5.63457	5.60493	5.60636
4.8	5.86346	5.86227	5.78335	5.78381	5.72471	5.72788	5.67552	5.67715	5.6331	5.63438	5.60444	5.60617
4.85	5.86369	5.8622	5.78353	5.78362	5.72542	5.72772	5.67259	5.67698	5.633	5.63419	5.60333	5.60598
4.9	5.86271	5.86213	5.78197	5.78344	5.72828	5.72755	5.67101	5.6768	5.63334	5.63401	5.60479	5.60579
4.95	5.86277	5.86206	5.78357	5.78325	5.72665	5.72739	5.6703	5.67662	5.63186	5.63382	5.60353	5.60561
5	5.86318	5.862	5.78321	5.78307	5.72531	5.72723	5.67452	5.67645	5.63328	5.63365	5.60395	5.60543
5.05	5.86291	5.86194	5.78222	5.78289	5.72532	5.72707	5.67396	5.67628	5.63288	5.63347	5.60488	5.60525
5.1	5.86352	5.86188	5.78088	5.78271	5.72522	5.72691	5.67253	5.6761	5.63278	5.6333	5.60387	5.60507
5.15	5.8633	5.86182	5.78045	5.78253	5.72464	5.72675	5.67492	5.67594	5.63171	5.63313	5.60482	5.60489
5.2	5.86301	5.86176	5.78392	5.78236	5.72296	5.7266	5.67494	5.67577	5.63298	5.63296	5.60464	5.60472
5.25	5.86205	5.8617	5.78058	5.78219	5.72493	5.72644	5.67174	5.67561	5.6313	5.6328	5.60293	5.60455
5.3	5.8648	5.86165	5.78133	5.78202	5.72323	5.72629	5.67166	5.67544	5.63134	5.63264	5.60314	5.60439
5.35	5.86137	5.86159	5.78133	5.78185	5.72573	5.72614	5.67141	5.67528	5.63036	5.63248	5.60431	5.60422
5.4	5.8607	5.86154	5.78076	5.78169	5.72412	5.72599	5.6732	5.67512	5.63272	5.63232	5.60274	5.60406
5.45	5.8633	5.86149	5.77911	5.78152	5.72305	5.72584	5.67529	5.67497	5.63063	5.63217	5.60326	5.6039
5.5	5.86296	5.86144	5.78091	5.78136	5.72416	5.7257	5.6728	5.67481	5.631	5.63202	5.60371	5.60375
5.55	5.86196	5.86139	5.77928	5.7812	5.72518	5.72555	5.67187	5.67466	5.63108	5.63187	5.6028	5.60359
5.6	5.86204	5.86134	5.77885	5.78104	5.7252	5.72541	5.67356	5.67451	5.63025	5.63173	5.60189	5.60344
5.65	5.86378	5.8613	5.77926	5.78089	5.72402	5.72527	5.67324	5.67435	5.63142	5.63158	5.60163	5.60329
5.7	5.86144	5.86125	5.77823	5.78073	5.72385	5.72512	5.6718	5.67421	5.63006	5.63144	5.60108	5.60314
5.75	5.86058	5.86121	5.77988	5.78058	5.72259	5.72499	5.67211	5.67406	5.6302	5.6313	5.60122	5.603
5.8	5.86228	5.86116	5.78007	5.78043	5.72456	5.72485	5.6705	5.67391	5.63116	5.63117	5.60217	5.60285
5.85	5.86036	5.86112	5.78125	5.78028	5.72354	5.72471	5.67137	5.67377	5.63097	5.63103	5.60119	5.60271
5.9	5.8636	5.86108	5.77891	5.78013	5.72359	5.72457	5.66938	5.67363	5.63095	5.6309	5.60337	5.60257
5.95	5.86106	5.86104	5.77688	5.77998	5.72382	5.72444	5.67109	5.67349	5.63168	5.63077	5.60226	5.60243
6	5.86309	5.861	5.78003	5.77984	5.72355	5.72431	5.67046	5.67335	5.63025	5.63064	5.60227	5.6023
6.05	5.85975	5.86096	5.7774	5.77969	5.72074	5.72417	5.67107	5.67321	5.63052	5.63052	5.60189	5.60217
6.1	5.86119	5.86092	5.77666	5.77955	5.72234	5.72404	5.67209	5.67308	5.63039	5.63039	5.60187	5.60203
6.15	5.86283	5.86089	5.77689	5.77941	5.72338	5.72391	5.67165	5.67294	5.63006	5.63027	5.60054	5.60191
6.2	5.86068	5.86085	5.77817	5.77927	5.72224	5.72379	5.66848	5.67281	5.62852	5.63015	5.60089	5.60178
6.25	5.86199	5.86081	5.77668	5.77913	5.72211	5.72366	5.67099	5.67268	5.63058	5.63004	5.60116	5.60165
6.3	5.85992	5.86078	5.77715	5.77899	5.71961	5.72353	5.672	5.67255	5.63088	5.62992	5.60152	5.60153
6.35	5.86229	5.86074	5.77756	5.77885	5.72253	5.72341	5.66988	5.67242	5.63039	5.62981	5.60073	5.60141
6.4	5.85957	5.86071	5.7789	5.77872	5.72405	5.72328	5.67172	5.67229	5.62986	5.62969	5.60046	5.60129
6.45	5.86262	5.86068	5.77828	5.77859	5.72254	5.72316	5.67142	5.67217	5.63232	5.62958	5.60252	5.60117
6.5	5.86205	5.86065	5.77687	5.77845	5.72229	5.72304	5.668	5.67204	5.63104	5.62948	5.6005	5.60105
6.55	5.86202	5.86061	5.77659	5.77832	5.72211	5.72292	5.67331	5.67192	5.63066	5.62937	5.60154	5.60094
6.6	5.86093	5.86058	5.77682	5.77819	5.72068	5.7228	5.66945	5.6718	5.63017	5.62927	5.60078	5.60082
6.65	5.86074	5.86055	5.77674	5.77806	5.72076	5.72268	5.67431	5.67168	5.6306	5.62916	5.60161	5.60071
6.7	5.85975	5.86052	5.7775	5.77794	5.72162	5.72257	5.67298	5.67156	5.6297	5.62906	5.60151	5.6006
6.75	5.86143	5.8605	5.77721	5.77781	5.72022	5.72245	5.66876	5.67144	5.6298	5.62896	5.5998	5.60049
6.8	5.8594	5.86047	5.7772	5.77768	5.72157	5.72233	5.66914	5.67132	5.62939	5.62886	5.60042	5.60039
6.85	5.85916	5.86044	5.77597	5.77756	5.72082	5.72222	5.67002	5.67121	5.62895	5.62877	5.60135	5.60028
6.9	5.86015	5.86041	5.77591	5.77744	5.72333	5.72211	5.66821	5.6711	5.62944	5.62867	5.59984	5.60018
6.95	5.86137	5.86038	5.77577	5.77731	5.72201	5.722	5.67274	5.67098	5.62768	5.62858	5.59967	5.60008
7	5.86053	5.86036	5.77603	5.77719	5.72061	5.72189	5.67319	5.67087	5.62877	5.62849	5.60078	5.59998
7.05	5.86024	5.86033	5.77796	5.77707	5.71976	5.72178	5.66784	5.67076	5.62762	5.6284	5.59883	5.59988
7.1	5.86159	5.86031	5.77558	5.77695	5.71999	5.72167	5.66973	5.67066	5.62845	5.62831	5.60114	5.59978
7.15	5.86102	5.86028	5.77698	5.77683	5.72005	5.72156	5.6685	5.67055	5.62991	5.62822	5.60004	5.59968
7.2	5.85946	5.86026	5.7756	5.77672	5.71929	5.72145	5.66621	5.67044	5.62961	5.62814	5.5996	5.59959
7.25	5.86058	5.86023	5.7769	5.7766	5.71836	5.72135	5.66805	5.67034	5.62846	5.62805	5.60134	5.5995
7.3	5.86106	5.86021	5.77547	5.77648	5.71944	5.72124	5.6684	5.67023	5.6284	5.62797	5.59952	5.5994
7.35	5.85921	5.86019	5.77652	5.77637	5.71961	5.72114	5.66722	5.67013	5.62827	5.62789	5.60108	5.59931
7.4	5.85954	5.86016	5.77526	5.77626	5.72102	5.72104	5.66965	5.67003	5.62727	5.62781	5.59936	5.59922
7.45	5.8599	5.86014	5.77537	5.77614	5.71793	5.72093	5.67057	5.66993	5.62774	5.62773	5.59867	5.59914
7.5	5.86001	5.86012	5.77518	5.77603	5.71971	5.72083	5.6693	5.66983	5.62923	5.62765	5.60005	5.59905
7.55	5.86118	5.8601	5.77631	5.77592	5.71992	5.72073	5.66981	5.66973	5.62782	5.62758	5.59971	5.59896
7.6	5.86125	5.86008	5.77566	5.77581	5.71847	5.72063	5.67099	5.66963	5.62724	5.6275	5.59813	5.59888
7.65	5.86174	5.86006	5.77465	5.7757	5.71814	5.72054	5.67215	5.66954	5.62898	5.62743	5.59897	5.5988
7.7	5.86044	5.86004	5.77488	5.77559	5.7208	5.72044	5.66664	5.66944	5.62818	5.62736	5.60033	5.59871
7.75	5.86195	5.86001	5.77317	5.77548	5.71763	5.72034	5.66977	5.66935	5.62844	5.62729	5.60036	5.59863
7.8	5.86228	5.86	5.77547	5.77538	5.71909	5.72025	5.66946	5.66926	5.62833	5.62722	5.60017	5.59856
7.85	5.86117	5.85998	5.77507	5.77527	5.71896	5.72015	5.66969	5.66917	5.62872	5.62715	5.59913	5.59848
7.9	5.86114	5.85996	5.77437	5.77517	5.71984	5.72006	5.66932	5.66907	5.62943	5.62708	5.60019	5.5984
7.95	5.8604	5.85994	5.77794	5.77506	5.71777	5.71997	5.6671	5.66898	5.62813	5.62701	5.59948	5.59832
8	5.86081	5.85992	5.77592	5.77496	5.71804	5.71987	5.66559	5.6689	5.62807	5.62695	5.59981	5.59825
8.05	5.8618	5.8599	5.77403	5.77485	5.71871	5.71978	5.66751	5.66881	5.62786	5.62688	5.5995	5.59818
8.1	5.86185	5.85988	5.77347	5.77475	5.71669	5.71969	5.667	5.66872	5.62727	5.62682	5.59976	5.5981
8.15	5.86011	5.85986	5.77474	5.77465	5.71936	5.7196	5.67034	5.66864	5.62785	5.62676	5.59945	5.59803
8.2	5.86046	5.85985	5.7755	5.77455	5.72146	5.71951	5.66414	5.66855	5.6281	5.6267	5.59954	5.59796
8.25	5.86064	5.85983	5.77422	5.77445	5.71796	5.71943	5.66739	5.66847	5.62815	5.62664	5.60012	5.59789
8.3	5.86014	5.85981	5.77385	5.77435	5.7205	5.71934	5.66783	5.66838	5.62833	5.62658	5.59976	5.59782
8.35	5.86171	5.85979	5.7752	5.77425	5.71863	5.71925	5.66819	5.6683	5.62881	5.62652	5.59933	5.59776
8.4	5.85974	5.85978	5.77321	5.77416	5.71945	5.71917	5.6692	5.66822	5.62871	5.62646	5.5989	5.59769
8.45	5.86147	5.85976	5.77345	5.77406	5.71907	5.71908	5.66717	5.66814	5.62913	5.6264	5.6007	5.59762
8.5	5.85994	5.85974	5.77293	5.77396	5.71952	5.719	5.66624	5.66806	5.62882	5.62635	5.59937	5.59756
8.55	5.86168	5.85973	5.77256	5.77387	5.7191	5.71891	5.66703	5.66798	5.62782	5.62629	5.59839	5.5975
8.6	5.86121	5.85971	5.77575	5.77377	5.71934	5.71883	5.6716	5.66791	5.62962	5.62624	5.5992	5.59743
8.65	5.8598	5.8597	5.77304	5.77368	5.71896	5.71875	5.66853	5.66783	5.62833	5.62619	5.59996	5.59737
8.7	5.86153	5.85968	5.77588	5.77359	5.71751	5.71867	5.67073	5.66775	5.62726	5.62614	5.60011	5.59731
8.75	5.86069	5.85966	5.7745	5.77349	5.71762	5.71859	5.66878	5.66768	5.62639	5.62608	5.59856	5.59725
8.8	5.86073	5.85965	5.77228	5.7734	5.71838	5.71851	5.66819	5.66761	5.6266	5.62603	5.59785	5.59719
8.85	5.86019	5.85963	5.77489	5.77331	5.71692	5.71843	5.66832	5.66753	5.62648	5.62599	5.5971	5.59714
8.9	5.86066	5.85962	5.77337	5.77322	5.71818	5.71835	5.67071	5.66746	5.62787	5.62594	5.59907	5.59708
8.95	5.8612	5.8596	5.77341	5.77313	5.71833	5.71828	5.66995	5.66739	5.62806	5.62589	5.59826	5.59702
9	5.86072	5.85959	5.77226	5.77304	5.71803	5.7182	5.66808	5.66732	5.62674	5.62584	5.60024	5.59697
9.05	5.8607	5.85957	5.77556	5.77295	5.71742	5.71812	5.66825	5.66725	5.62794	5.6258	5.59811	5.59691
9.1	5.86123	5.85956	5.77303	5.77286	5.71761	5.71805	5.66619	5.66718	5.62754	5.62575	5.59893	5.59686
9.15	5.86067	5.85955	5.77216	5.77278	5.71692	5.71797	5.66939	5.66711	5.62802	5.62571	5.59906	5.5968
9.2	5.8613	5.85953	5.77295	5.77269	5.71799	5.7179	5.66804	5.66704	5.62735	5.62566	5.59898	5.59675
9.25	5.8613	5.85952	5.77141	5.7726	5.71781	5.71783	5.66687	5.66697	5.62816	5.62562	5.59944	5.5967
9.3	5.85939	5.8595	5.77163	5.77252	5.71719	5.71775	5.66922	5.66691	5.62767	5.62558	5.59621	5.59665
9.35	5.86053	5.85949	5.77185	5.77243	5.71965	5.71768	5.66872	5.66684	5.6264	5.62553	5.59729	5.5966
9.4	5.86337	5.85948	5.77176	5.77235	5.71714	5.71761	5.66725	5.66678	5.62656	5.62549	5.59818	5.59655
9.45	5.86103	5.85946	5.77059	5.77226	5.7163	5.71754	5.66848	5.66671	5.62719	5.62545	5.59793	5.5965
9.5	5.86055	5.85945	5.77246	5.77218	5.71754	5.71747	5.66746	5.66665	5.62682	5.62541	5.59823	5.59645
9.55	5.86034	5.85944	5.77268	5.7721	5.71644	5.7174	5.66628	5.66659	5.62617	5.62537	5.59806	5.59641
9.6	5.86261	5.85942	5.77059	5.77202	5.71547	5.71733	5.66919	5.66653	5.62435	5.62534	5.59825	5.59636
9.65	5.86059	5.85941	5.77225	5.77194	5.71761	5.71726	5.67019	5.66647	5.6256	5.6253	5.59713	5.59632
9.7	5.86228	5.8594	5.76941	5.77186	5.71754	5.7172	5.6687	5.66641	5.62717	5.62526	5.59906	5.59627
9.75	5.8609	5.85939	5.77092	5.77178	5.71801	5.71713	5.66758	5.66635	5.62765	5.62522	5.59767	5.59623
9.8	5.86188	5.85937	5.77222	5.7717	5.71753	5.71706	5.66953	5.66629	5.62651	5.62519	5.59688	5.59618
9.85	5.86127	5.85936	5.77154	5.77162	5.71568	5.717	5.66496	5.66623	5.62538	5.62515	5.5993	5.59614
9.9	5.86031	5.85935	5.76995	5.77154	5.71531	5.71693	5.66648	5.66617	5.62578	5.62512	5.59839	5.5961
9.95	5.8597	5.85933	5.77131	5.77146	5.71839	5.71687	5.66692	5.66611	5.62686	5.62508	5.59996	5.59605
10	5.86187	5.85932	5.77108	5.77138	5.71788	5.71681	5.66756	5.66606	5.62595	5.62505	5.59846	5.59601
10.05	5.86152	5.85931	5.77222	5.77131	5.71733	5.71674	5.66888	5.666	5.62641	5.62502	5.59832	5.59597
10.1	5.85847	5.8593	5.77136	5.77123	5.7177	5.71668	5.66864	5.66594	5.62649	5.62498	5.59804	5.59593
10.15	5.85986	5.85929	5.77006	5.77115	5.7166	5.71662	5.66839	5.66589	5.62504	5.62495	5.59844	5.59589
10.2	5.86022	5.85927	5.77006	5.77108	5.71777	5.71656	5.66727	5.66584	5.62568	5.62492	5.59983	5.59585
10.25	5.85737	5.85926	5.77154	5.77101	5.71649	5.7165	5.66567	5.66578	5.62408	5.62489	5.59767	5.59582
10.3	5.86023	5.85925	5.77246	5.77093	5.7163	5.71644	5.66794	5.66573	5.62568	5.62486	5.59922	5.59578
10.35	5.85967	5.85924	5.77053	5.77086	5.71646	5.71638	5.66735	5.66568	5.62738	5.62483	5.59775	5.59574
10.4	5.86153	5.85923	5.77116	5.77078	5.71704	5.71632	5.66939	5.66563	5.62478	5.6248	5.59734	5.5957
10.45	5.85917	5.85921	5.77112	5.77071	5.71499	5.71626	5.66938	5.66557	5.62483	5.62477	5.59872	5.59567
10.5	5.85997	5.8592	5.7712	5.77064	5.71613	5.7162	5.66517	5.66552	5.62564	5.62474	5.5992	5.59563
10.55	5.85884	5.85919	5.7703	5.77057	5.71594	5.71614	5.66401	5.66547	5.62509	5.62471	5.59852	5.5956
10.6	5.8597	5.85918	5.77109	5.7705	5.71622	5.71608	5.66767	5.66542	5.62362	5.62469	5.59761	5.59556
10.65	5.85876	5.85917	5.76962	5.77043	5.7148	5.71603	5.66672	5.66538	5.62564	5.62466	5.59708	5.59553
10.7	5.85869	5.85916	5.77164	5.77036	5.71527	5.71597	5.66607	5.66533	5.62683	5.62463	5.59787	5.5955
10.75	5.85828	5.85915	5.77121	5.77029	5.71679	5.71592	5.66542	5.66528	5.62542	5.62461	5.59733	5.59546
10.8	5.86015	5.85913	5.77236	5.77022	5.71682	5.71586	5.66456	5.66523	5.62497	5.62458	5.59818	5.59543
10.85	5.85977	5.85912	5.77248	5.77015	5.71541	5.71581	5.66447	5.66519	5.62633	5.62456	5.59688	5.5954
10.9	5.86064	5.85911	5.7693	5.77008	5.71453	5.71575	5.66764	5.66514	5.62828	5.62453	5.59829	5.59537
10.95	5.85804	5.8591	5.77141	5.77001	5.71673	5.7157	5.6665	5.66509	5.62614	5.62451	5.59933	5.59534
11	5.85919	5.85909	5.76818	5.76995	5.71648	5.71565	5.66409	5.66505	5.6267	5.62448	5.59849	5.5953
11.05	5.85848	5.85908	5.77008	5.76988	5.71716	5.71559	5.66567	5.665	5.62432	5.62446	5.5969	5.59527
11.1	5.85766	5.85907	5.77142	5.76981	5.71803	5.71554	5.66861	5.66496	5.62705	5.62444	5.59792	5.59525
11.15	5.86017	5.85906	5.77212	5.76975	5.71722	5.71549	5.66513	5.66492	5.62677	5.62441	5.59779	5.59522
11.2	5.85934	5.85905	5.76977	5.76968	5.71592	5.71544	5.66441	5.66487	5.6253	5.62439	5.59744	5.59519
11.25	5.85761	5.85904	5.76894	5.76962	5.71845	5.71539	5.66604	5.66483	5.62614	5.62437	5.59813	5.59516
11.3	5.85928	5.85902	5.77119	5.76955	5.71547	5.71534	5.66389	5.66479	5.6267	5.62435	5.59709	5.59513
11.35	5.85911	5.85901	5.77171	5.76949	5.71578	5.71529	5.66598	5.66475	5.62659	5.62433	5.59814	5.5951
11.4	5.85971	5.859	5.76919	5.76943	5.71536	5.71524	5.66526	5.6647	5.62441	5.6243	5.5965	5.59508
11.45	5.85882	5.85899	5.769	5.76936	5.71585	5.71519	5.66681	5.66466	5.62561	5.62428	5.59893	5.59505
11.5	5.86091	5.85898	5.76797	5.7693	5.71541	5.71514	5.669	5.66462	5.62607	5.62426	5.59772	5.59502
11.55	5.86025	5.85897	5.76971	5.76924	5.71709	5.71509	5.66359	5.66458	5.62739	5.62424	5.59907	5.595
11.6	5.85924	5.85896	5.76758	5.76918	5.71468	5.71505	5.66535	5.66454	5.62644	5.62422	5.59783	5.59497
11.65	5.86028	5.85895	5.77027	5.76912	5.71505	5.715	5.66671	5.6645	5.62642	5.6242	5.59877	5.59495
11.7	5.85899	5.85894	5.76792	5.76906	5.71572	5.71495	5.66503	5.66447	5.62603	5.62418	5.59953	5.59492
11.75	5.85995	5.85893	5.76853	5.769	5.71565	5.71491	5.66557	5.66443	5.62558	5.62417	5.59887	5.5949
11.8	5.85796	5.85892	5.76829	5.76894	5.71653	5.71486	5.66653	5.66439	5.62526	5.62415	5.59942	5.59487
11.85	5.85786	5.85891	5.77008	5.76888	5.7155	5.71481	5.66774	5.66435	5.62569	5.62413	5.59813	5.59485
11.9	5.85963	5.8589	5.76887	5.76882	5.71471	5.71477	5.66444	5.66432	5.62488	5.62411	5.59924	5.59482
11.95	5.85952	5.85889	5.76924	5.76876	5.71508	5.71472	5.66474	5.66428	5.62514	5.62409	5.59909	5.5948
12	5.85876	5.85888	5.76716	5.7687	5.71674	5.71468	5.66396	5.66424	5.62488	5.62408	5.59962	5.59478
12.05	5.85866	5.85887	5.76924	5.76864	5.71403	5.71464	5.66365	5.66421	5.6249	5.62406	5.59755	5.59476
12.1	5.85749	5.85886	5.76726	5.76859	5.71443	5.71459	5.66796	5.66417	5.62619	5.62404	5.59697	5.59473
12.15	5.85923	5.85884	5.76639	5.76853	5.71484	5.71455	5.66458	5.66414	5.62548	5.62403	5.59642	5.59471
12.2	5.85837	5.85883	5.76766	5.76847	5.71466	5.71451	5.66722	5.6641	5.62496	5.62401	5.59828	5.59469
12.25	5.85635	5.85882	5.76783	5.76842	5.71374	5.71447	5.66424	5.66407	5.62591	5.62399	5.5967	5.59467
12.3	5.85947	5.85881	5.76643	5.76836	5.71474	5.71442	5.66634	5.66404	5.62511	5.62398	5.59662	5.59465
12.35	5.85873	5.8588	5.76745	5.7683	5.7143	5.71438	5.6655	5.664	5.62329	5.62396	5.59905	5.59463
12.4	5.86204	5.85879	5.76837	5.76825	5.71493	5.71434	5.66498	5.66397	5.62551	5.62395	5.597	5.59461
12.45	5.85795	5.85878	5.76657	5.76819	5.71377	5.7143	5.66485	5.66394	5.62414	5.62393	5.5954	5.59459
12.5	5.8586	5.85877	5.76763	5.76814	5.71369	5.71426	5.66783	5.6639	5.62375	5.62392	5.5982	5.59457
12.55	5.86142	5.85876	5.76692	5.76809	5.71398	5.71422	5.66149	5.66387	5.6256	5.6239	5.59769	5.59455
12.6	5.8574	5.85875	5.76783	5.76803	5.71353	5.71418	5.66825	5.66384	5.62495	5.62389	5.59815	5.59453
12.65	5.85971	5.85874	5.76781	5.76798	5.71326	5.71414	5.66583	5.66381	5.62678	5.62388	5.59609	5.59451
12.7	5.86131	5.85873	5.76819	5.76793	5.71469	5.7141	5.66821	5.66378	5.62449	5.62386	5.59654	5.59449
12.75	5.86013	5.85872	5.7657	5.76787	5.7134	5.71407	5.66813	5.66375	5.62491	5.62385	5.59662	5.59447
12.8	5.86094	5.85871	5.76655	5.76782	5.71473	5.71403	5.66502	5.66372	5.62607	5.62384	5.59659	5.59446
12.85	5.85957	5.8587	5.7671	5.76777	5.715	5.71399	5.66611	5.66369	5.6256	5.62382	5.59705	5.59444
12.9	5.85856	5.85869	5.76606	5.76772	5.71356	5.71395	5.66638	5.66366	5.62313	5.62381	5.59635	5.59442
12.95	5.86071	5.85868	5.76622	5.76767	5.71579	5.71391	5.66658	5.66363	5.6243	5.6238	5.59777	5.5944
13	5.85885	5.85867	5.76501	5.76762	5.71403	5.71388	5.66628	5.6636	5.62366	5.62379	5.59758	5.59439
13.05	5.85935	5.85866	5.76636	5.76757	5.71359	5.71384	5.66657	5.66357	5.6236	5.62377	5.5956	5.59437
13.1	5.85965	5.85865	5.76733	5.76752	5.71577	5.71381	5.6668	5.66354	5.62322	5.62376	5.59688	5.59435
13.15	5.85875	5.85864	5.76794	5.76747	5.71367	5.71377	5.66654	5.66352	5.62404	5.62375	5.59826	5.59434
13.2	5.85811	5.85863	5.76762	5.76742	5.71191	5.71373	5.6649	5.66349	5.624	5.62374	5.59704	5.59432
13.25	5.85639	5.85862	5.76847	5.76737	5.71346	5.7137	5.66577	5.66346	5.62518	5.62373	5.59519	5.59431
13.3	5.85965	5.85861	5.76735	5.76732	5.71351	5.71366	5.66609	5.66343	5.62432	5.62372	5.59795	5.59429
13.35	5.85882	5.8586	5.76844	5.76727	5.71433	5.71363	5.6668	5.66341	5.62323	5.6237	5.59695	5.59428
13.4	5.85865	5.85859	5.76763	5.76723	5.71573	5.7136	5.6673	5.66338	5.62519	5.62369	5.597	5.59426
13.45	5.85844	5.85858	5.76724	5.76718	5.71421	5.71356	5.66859	5.66336	5.62335	5.62368	5.59491	5.59425
13.5	5.85708	5.85857	5.76883	5.76713	5.71315	5.71353	5.66767	5.66333	5.62307	5.62367	5.59638	5.59423
13.55	5.85863	5.85856	5.76847	5.76708	5.7129	5.71349	5.66399	5.6633	5.62417	5.62366	5.59778	5.59422
13.6	5.85807	5.85855	5.76676	5.76704	5.71324	5.71346	5.6644	5.66328	5.62533	5.62365	5.59704	5.5942
13.65	5.85958	5.85854	5.7702	5.76699	5.71377	5.71343	5.66492	5.66325	5.62481	5.62364	5.59568	5.59419
13.7	5.85777	5.85853	5.76815	5.76695	5.71384	5.7134	5.66453	5.66323	5.62491	5.62363	5.59763	5.59417
13.75	5.85815	5.85852	5.76748	5.7669	5.71222	5.71337	5.66594	5.66321	5.62471	5.62362	5.5964	5.59416
13.8	5.85847	5.85851	5.76777	5.76685	5.71426	5.71333	5.66288	5.66318	5.6248	5.62361	5.59694	5.59415
13.85	5.85675	5.8585	5.76866	5.76681	5.7129	5.7133	5.66298	5.66316	5.62543	5.6236	5.59732	5.59413
13.9	5.85897	5.85849	5.76678	5.76677	5.71294	5.71327	5.66578	5.66313	5.62435	5.62359	5.59656	5.59412
13.95	5.85949	5.85848	5.76561	5.76672	5.71474	5.71324	5.66456	5.66311	5.62466	5.62359	5.59664	5.59411
14	5.85803	5.85847	5.76586	5.76668	5.71446	5.71321	5.66035	5.66309	5.62495	5.62358	5.59659	5.5941
14.05	5.85827	5.85846	5.76512	5.76663	5.71276	5.71318	5.66524	5.66306	5.62559	5.62357	5.59693	5.59408
14.1	5.8597	5.85846	5.76704	5.76659	5.7128	5.71315	5.66796	5.66304	5.62426	5.62356	5.59684	5.59407
14.15	5.8582	5.85845	5.76854	5.76655	5.71311	5.71312	5.66614	5.66302	5.62513	5.62355	5.59714	5.59406
14.2	5.86057	5.85844	5.76612	5.7665	5.71338	5.71309	5.66634	5.663	5.62444	5.62354	5.59745	5.59405
14.25	5.85711	5.85843	5.76591	5.76646	5.71307	5.71306	5.66764	5.66298	5.62321	5.62353	5.59684	5.59404
14.3	5.85833	5.85842	5.76582	5.76642	5.71532	5.71303	5.66528	5.66295	5.62362	5.62353	5.59598	5.59402
14.35	5.85826	5.85841	5.76762	5.76638	5.71205	5.713	5.66475	5.66293	5.62547	5.62352	5.59743	5.59401
14.4	5.85829	5.8584	5.76604	5.76634	5.71319	5.71297	5.66674	5.66291	5.6251	5.62351	5.59681	5.594
14.45	5.85831	5.85839	5.76505	5.7663	5.71395	5.71295	5.66675	5.66289	5.62388	5.6235	5.59603	5.59399
14.5	5.85839	5.85838	5.76608	5.76625	5.71397	5.71292	5.66633	5.66287	5.62434	5.6235	5.59724	5.59398
14.55	5.85728	5.85837	5.766	5.76621	5.71292	5.71289	5.66621	5.66285	5.62493	5.62349	5.59675	5.59397
14.6	5.85792	5.85836	5.76698	5.76617	5.71372	5.71286	5.66549	5.66283	5.62323	5.62348	5.59635	5.59396
14.65	5.85876	5.85835	5.76489	5.76613	5.71134	5.71284	5.66555	5.66281	5.62447	5.62347	5.59723	5.59395
14.7	5.85848	5.85834	5.76685	5.76609	5.71494	5.71281	5.66521	5.66279	5.62351	5.62347	5.59726	5.59394
14.75	5.85702	5.85833	5.76587	5.76605	5.71352	5.71278	5.66314	5.66277	5.62452	5.62346	5.59591	5.59393
14.8	5.85699	5.85832	5.76621	5.76601	5.71535	5.71276	5.66422	5.66275	5.62281	5.62345	5.59655	5.59392
14.85	5.85878	5.85831	5.76615	5.76598	5.71226	5.71273	5.66703	5.66273	5.62369	5.62345	5.59622	5.59391
14.9	5.85901	5.8583	5.76623	5.76594	5.7137	5.7127	5.66632	5.66271	5.62357	5.62344	5.59631	5.5939
14.95	5.85698	5.85829	5.76698	5.7659	5.71472	5.71268	5.66403	5.6627	5.62467	5.62343	5.59682	5.59389
15	5.86033	5.85828	5.76581	5.76586	5.71345	5.71265	5.66573	5.66268	5.62264	5.62343	5.59626	5.59388
15.05	5.857	5.85827	5.76495	5.76582	5.71191	5.71263	5.66798	5.66266	5.62244	5.62342	5.59628	5.59387
15.1	5.85958	5.85826	5.76633	5.76578	5.71229	5.7126	5.66217	5.66264	5.62414	5.62342	5.59643	5.59386
15.15	5.85803	5.85825	5.76755	5.76575	5.7146	5.71258	5.66492	5.66262	5.62409	5.62341	5.5952	5.59385
15.2	5.85945	5.85824	5.76939	5.76571	5.71395	5.71255	5.66646	5.66261	5.62336	5.6234	5.59671	5.59384
15.25	5.85827	5.85823	5.76643	5.76567	5.71285	5.71253	5.66462	5.66259	5.62347	5.6234	5.59693	5.59384
15.3	5.85782	5.85822	5.76744	5.76564	5.71299	5.7125	5.66461	5.66257	5.62417	5.62339	5.59497	5.59383
15.35	5.85711	5.85821	5.76834	5.7656	5.71402	5.71248	5.6646	5.66255	5.62316	5.62339	5.59589	5.59382
15.4	5.85734	5.8582	5.76622	5.76556	5.71356	5.71246	5.66551	5.66254	5.62329	5.62338	5.59764	5.59381
15.45	5.8583	5.85819	5.76631	5.76553	5.71202	5.71243	5.6637	5.66252	5.62483	5.62337	5.59446	5.5938
15.5	5.85927	5.85818	5.76795	5.76549	5.71342	5.71241	5.66338	5.6625	5.6247	5.62337	5.5952	5.59379
15.55	5.8585	5.85817	5.76672	5.76546	5.71197	5.71239	5.66452	5.66249	5.62461	5.62336	5.59413	5.59379
15.6	5.8602	5.85816	5.76584	5.76542	5.71238	5.71236	5.665	5.66247	5.62249	5.62336	5.59488	5.59378
15.65	5.85857	5.85815	5.76465	5.76539	5.71276	5.71234	5.66179	5.66246	5.62344	5.62335	5.59383	5.59377
15.7	5.85941	5.85814	5.76499	5.76535	5.71504	5.71232	5.66464	5.66244	5.62214	5.62335	5.59551	5.59376
15.75	5.85818	5.85813	5.76589	5.76532	5.71297	5.7123	5.66668	5.66242	5.62303	5.62334	5.59407	5.59376
15.8	5.85822	5.85813	5.76578	5.76528	5.71046	5.71228	5.66704	5.66241	5.62249	5.62334	5.59575	5.59375
15.85	5.85855	5.85812	5.76556	5.76525	5.71448	5.71225	5.66503	5.66239	5.62326	5.62333	5.59402	5.59374
15.9	5.8563	5.85811	5.76464	5.76522	5.71226	5.71223	5.66557	5.66238	5.62489	5.62333	5.59657	5.59373
15.95	5.85898	5.8581	5.76427	5.76518	5.71349	5.71221	5.66799	5.66236	5.62278	5.62333	5.59404	5.59373
16	5.85857	5.85809	5.76459	5.76515	5.71298	5.71219	5.66906	5.66235	5.62534	5.62332	5.59573	5.59372
16.05	5.85901	5.85808	5.76604	5.76512	5.71263	5.71217	5.66659	5.66233	5.62634	5.62332	5.59512	5.59371
16.1	5.85778	5.85807	5.76564	5.76508	5.71306	5.71215	5.66618	5.66232	5.62513	5.62331	5.59516	5.59371
16.15	5.85737	5.85806	5.76609	5.76505	5.71091	5.71213	5.66627	5.66231	5.62488	5.62331	5.59536	5.5937
16.2	5.85661	5.85805	5.76495	5.76502	5.71379	5.71211	5.66262	5.66229	5.62334	5.6233	5.59542	5.59369
16.25	5.85814	5.85804	5.76628	5.76499	5.71209	5.71209	5.66596	5.66228	5.62498	5.6233	5.59515	5.59369
16.3	5.85746	5.85803	5.76582	5.76496	5.71263	5.71207	5.66575	5.66226	5.6231	5.62329	5.59517	5.59368
16.35	5.85537	5.85802	5.76518	5.76492	5.7122	5.71205	5.66459	5.66225	5.62399	5.62329	5.5962	5.59367
16.4	5.858	5.85801	5.76485	5.76489	5.71254	5.71203	5.66597	5.66224	5.62468	5.62329	5.59435	5.59367
16.45	5.85804	5.858	5.76349	5.76486	5.71232	5.71201	5.66461	5.66222	5.62421	5.62328	5.5947	5.59366
16.5	5.85858	5.85799	5.76441	5.76483	5.71282	5.71199	5.66437	5.66221	5.62397	5.62328	5.59644	5.59366
16.55	5.85807	5.85798	5.76451	5.7648	5.71234	5.71197	5.66378	5.6622	5.62391	5.62327	5.59514	5.59365
16.6	5.8575	5.85797	5.7628	5.76477	5.71054	5.71195	5.66318	5.66219	5.62443	5.62327	5.59438	5.59364
16.65	5.8567	5.85796	5.76496	5.76474	5.7117	5.71193	5.66365	5.66217	5.6247	5.62327	5.59684	5.59364
16.7	5.85834	5.85795	5.76284	5.76471	5.71101	5.71191	5.66517	5.66216	5.62411	5.62326	5.59488	5.59363
16.75	5.85859	5.85794	5.76333	5.76468	5.71204	5.71189	5.66276	5.66215	5.62521	5.62326	5.5937	5.59363
16.8	5.85641	5.85793	5.76424	5.76465	5.7131	5.71188	5.66335	5.66214	5.62476	5.62326	5.59567	5.59362
16.85	5.85831	5.85792	5.76386	5.76462	5.71242	5.71186	5.66269	5.66212	5.62493	5.62325	5.59414	5.59362
16.9	5.858	5.85791	5.76505	5.76459	5.71293	5.71184	5.66269	5.66211	5.62465	5.62325	5.5952	5.59361
16.95	5.85808	5.8579	5.76594	5.76456	5.71074	5.71182	5.66671	5.6621	5.62483	5.62325	5.59541	5.59361
17	5.85728	5.85789	5.76521	5.76453	5.71235	5.7118	5.66335	5.66209	5.62355	5.62324	5.59523	5.5936
17.05	5.85786	5.85788	5.76552	5.7645	5.71318	5.71179	5.66652	5.66208	5.62432	5.62324	5.59539	5.5936
17.1	5.85745	5.85787	5.76612	5.76448	5.71271	5.71177	5.66722	5.66206	5.62315	5.62324	5.59517	5.59359
17.15	5.85798	5.85787	5.76432	5.76445	5.71353	5.71175	5.66531	5.66205	5.62416	5.62323	5.5963	5.59359
17.2	5.85837	5.85786	5.76533	5.76442	5.71173	5.71174	5.66444	5.66204	5.62579	5.62323	5.59616	5.59358
17.25	5.85832	5.85785	5.76403	5.76439	5.7123	5.71172	5.66579	5.66203	5.62394	5.62323	5.5958	5.59358
17.3	5.85732	5.85784	5.76562	5.76436	5.71183	5.7117	5.66787	5.66202	5.62393	5.62322	5.59701	5.59357
17.35	5.8582	5.85783	5.76445	5.76434	5.71397	5.71169	5.66426	5.66201	5.62412	5.62322	5.59532	5.59357
17.4	5.8576	5.85782	5.76326	5.76431	5.71371	5.71167	5.66217	5.662	5.62214	5.62322	5.59706	5.59356
17.45	5.85666	5.85781	5.76488	5.76428	5.71333	5.71165	5.66563	5.66199	5.62261	5.62322	5.59662	5.59356
17.5	5.85786	5.8578	5.76382	5.76426	5.71469	5.71164	5.66459	5.66198	5.62456	5.62321	5.59675	5.59355
17.55	5.85892	5.85779	5.76376	5.76423	5.71354	5.71162	5.6614	5.66197	5.62273	5.62321	5.59801	5.59355
17.6	5.85828	5.85778	5.76472	5.7642	5.71404	5.71161	5.66511	5.66196	5.6225	5.62321	5.59638	5.59354
17.65	5.857	5.85777	5.76445	5.76418	5.7147	5.71159	5.6645	5.66195	5.62299	5.62321	5.59607	5.59354
17.7	5.85825	5.85776	5.76477	5.76415	5.71443	5.71157	5.66232	5.66194	5.62465	5.6232	5.59703	5.59354
17.75	5.85842	5.85775	5.76519	5.76412	5.71456	5.71156	5.66174	5.66193	5.62457	5.6232	5.59624	5.59353
17.8	5.85764	5.85774	5.76331	5.7641	5.71467	5.71154	5.66379	5.66192	5.62183	5.6232	5.59626	5.59353
17.85	5.85604	5.85773	5.7654	5.76407	5.71415	5.71153	5.6648	5.66191	5.6217	5.6232	5.59512	5.59352
17.9	5.86004	5.85772	5.76538	5.76405	5.71412	5.71151	5.66488	5.6619	5.62448	5.62319	5.59601	5.59352
17.95	5.86024	5.85771	5.76494	5.76402	5.71285	5.7115	5.66362	5.66189	5.62425	5.62319	5.59761	5.59352
18	5.85938	5.8577	5.76384	5.764	5.71425	5.71148	5.66324	5.66188	5.62278	5.62319	5.59591	5.59351
18.05	5.85819	5.85769	5.76494	5.76397	5.71356	5.71147	5.66245	5.66187	5.62489	5.62319	5.59592	5.59351
18.1	5.85695	5.85768	5.76541	5.76395	5.7151	5.71145	5.66316	5.66186	5.62247	5.62318	5.5979	5.5935
18.15	5.85816	5.85767	5.76493	5.76392	5.71111	5.71144	5.666	5.66185	5.62238	5.62318	5.59839	5.5935
18.2	5.85912	5.85766	5.76327	5.7639	5.71254	5.71143	5.66505	5.66184	5.62316	5.62318	5.59574	5.5935
18.25	5.85853	5.85765	5.76529	5.76387	5.71715	5.71141	5.66237	5.66183	5.62225	5.62318	5.5956	5.59349
18.3	5.85783	5.85764	5.76626	5.76385	5.71444	5.7114	5.66109	5.66182	5.62354	5.62318	5.59489	5.59349
18.35	5.85699	5.85763	5.76526	5.76383	5.71315	5.71138	5.66464	5.66182	5.62301	5.62317	5.59696	5.59349
18.4	5.85605	5.85763	5.76421	5.7638	5.7142	5.71137	5.66128	5.66181	5.62134	5.62317	5.59612	5.59348
18.45	5.85749	5.85762	5.76614	5.76378	5.71355	5.71136	5.66499	5.6618	5.62154	5.62317	5.5991	5.59348
18.5	5.85678	5.85761	5.76615	5.76376	5.71138	5.71134	5.66325	5.66179	5.62273	5.62317	5.59738	5.59348
18.55	5.85729	5.8576	5.7656	5.76373	5.71502	5.71133	5.66527	5.66178	5.62277	5.62317	5.59668	5.59347
18.6	5.85764	5.85759	5.76449	5.76371	5.71322	5.71132	5.6638	5.66177	5.62293	5.62316	5.5967	5.59347
18.65	5.85725	5.85758	5.76479	5.76369	5.7131	5.7113	5.66507	5.66177	5.62244	5.62316	5.59627	5.59347
18.7	5.85676	5.85757	5.76424	5.76366	5.71249	5.71129	5.66393	5.66176	5.62176	5.62316	5.59565	5.59346
18.75	5.85822	5.85756	5.76397	5.76364	5.7144	5.71128	5.66212	5.66175	5.62228	5.62316	5.59455	5.59346
18.8	5.85736	5.85755	5.76395	5.76362	5.71302	5.71127	5.66242	5.66174	5.62186	5.62316	5.59603	5.59346
18.85	5.85593	5.85754	5.76173	5.7636	5.71319	5.71125	5.66278	5.66173	5.62177	5.62315	5.59458	5.59345
18.9	5.85647	5.85753	5.76513	5.76357	5.71416	5.71124	5.66109	5.66173	5.62172	5.62315	5.59715	5.59345
18.95	5.85802	5.85752	5.76581	5.76355	5.71292	5.71123	5.66374	5.66172	5.62236	5.62315	5.59519	5.59345
19	5.85708	5.85751	5.76294	5.76353	5.71165	5.71122	5.66221	5.66171	5.62278	5.62315	5.59639	5.59345
19.05	5.85699	5.8575	5.76622	5.76351	5.71361	5.7112	5.6598	5.6617	5.62315	5.62315	5.59635	5.59344
19.1	5.85724	5.85749	5.76273	5.76349	5.71244	5.71119	5.66368	5.6617	5.62299	5.62315	5.59791	5.59344
19.15	5.85599	5.85748	5.76585	5.76347	5.71127	5.71118	5.66116	5.66169	5.6236	5.62314	5.5973	5.59344
19.2	5.85669	5.85747	5.76369	5.76345	5.71281	5.71117	5.66211	5.66168	5.6204	5.62314	5.59658	5.59343
19.25	5.85669	5.85746	5.76367	5.76342	5.71078	5.71116	5.66015	5.66168	5.62341	5.62314	5.59534	5.59343
19.3	5.85634	5.85745	5.76593	5.7634	5.71174	5.71115	5.66383	5.66167	5.62204	5.62314	5.59638	5.59343
19.35	5.85771	5.85744	5.76378	5.76338	5.71086	5.71113	5.66275	5.66166	5.62304	5.62314	5.59527	5.59343
19.4	5.85521	5.85743	5.76416	5.76336	5.71283	5.71112	5.66169	5.66165	5.62526	5.62314	5.59638	5.59342
19.45	5.85813	5.85742	5.76365	5.76334	5.71264	5.71111	5.66299	5.66165	5.62393	5.62314	5.59753	5.59342
19.5	5.85712	5.85741	5.76329	5.76332	5.71437	5.7111	5.66171	5.66164	5.62535	5.62313	5.59554	5.59342
19.55	5.85766	5.8574	5.76293	5.7633	5.71165	5.71109	5.66234	5.66163	5.62232	5.62313	5.59579	5.59342
19.6	5.85897	5.85739	5.76278	5.76328	5.71102	5.71108	5.66245	5.66163	5.62372	5.62313	5.59866	5.59341
19.65	5.85615	5.85738	5.76311	5.76326	5.71086	5.71107	5.66283	5.66162	5.62375	5.62313	5.5958	5.59341
19.7	5.85738	5.85738	5.76359	5.76324	5.71365	5.71106	5.66031	5.66162	5.62393	5.62313	5.59525	5.59341
19.75	5.85621	5.85737	5.76503	5.76322	5.71332	5.71105	5.66187	5.66161	5.62468	5.62313	5.5949	5.59341
19.8	5.85737	5.85736	5.76415	5.7632	5.71233	5.71104	5.66235	5.6616	5.62435	5.62313	5.59709	5.59341
19.85	5.85577	5.85735	5.76416	5.76318	5.71356	5.71103	5.66188	5.6616	5.62449	5.62312	5.59614	5.5934
19.9	5.85616	5.85734	5.76128	5.76316	5.71176	5.71101	5.66431	5.66159	5.62407	5.62312	5.5974	5.5934
19.95	5.85636	5.85733	5.76442	5.76314	5.71389	5.711	5.66327	5.66158	5.62286	5.62312	5.59614	5.5934
20	5.85708	5.85732	5.7633	5.76313	5.71422	5.71099	5.66281	5.66158	5.62474	5.62312	5.59556	5.5934
20.05	5.85753	5.85731	5.76423	5.76311	5.71357	5.71098	5.66231	5.66157	5.62426	5.62312	5.59605	5.59339
20.1	5.85633	5.8573	5.76251	5.76309	5.71298	5.71097	5.6618	5.66157	5.62461	5.62312	5.59559	5.59339
20.15	5.85953	5.85729	5.76245	5.76307	5.71297	5.71096	5.66264	5.66156	5.62304	5.62312	5.59615	5.59339
20.2	5.85569	5.85728	5.76503	5.76305	5.71375	5.71095	5.66217	5.66156	5.62403	5.62312	5.59639	5.59339
20.25	5.857	5.85727	5.76475	5.76303	5.71247	5.71095	5.66518	5.66155	5.62522	5.62312	5.59558	5.59339
20.3	5.85541	5.85726	5.76315	5.76302	5.71266	5.71094	5.66	5.66154	5.62318	5.62311	5.59481	5.59338
20.35	5.85676	5.85725	5.76259	5.763	5.71284	5.71093	5.66202	5.66154	5.62364	5.62311	5.59592	5.59338
20.4	5.85746	5.85724	5.76235	5.76298	5.71225	5.71092	5.66076	5.66153	5.62319	5.62311	5.59434	5.59338
20.45	5.85508	5.85723	5.76334	5.76296	5.71102	5.71091	5.66243	5.66153	5.62473	5.62311	5.59701	5.59338
20.5	5.8566	5.85722	5.76307	5.76294	5.71174	5.7109	5.66116	5.66152	5.62426	5.62311	5.59661	5.59338
20.55	5.85607	5.85721	5.76366	5.76293	5.71389	5.71089	5.66029	5.66152	5.62279	5.62311	5.59626	5.59338
20.6	5.85811	5.8572	5.76298	5.76291	5.71109	5.71088	5.66178	5.66151	5.62335	5.62311	5.59481	5.59337
20.65	5.85601	5.85719	5.76391	5.76289	5.71222	5.71087	5.66549	5.66151	5.62316	5.62311	5.59583	5.59337
20.7	5.85673	5.85718	5.76304	5.76287	5.71162	5.71086	5.66288	5.6615	5.62412	5.62311	5.59605	5.59337
20.75	5.85567	5.85717	5.76215	5.76286	5.70922	5.71085	5.66342	5.6615	5.62393	5.62311	5.59567	5.59337
20.8	5.85625	5.85716	5.76306	5.76284	5.71117	5.71084	5.66422	5.66149	5.62304	5.6231	5.59528	5.59337
20.85	5.8546	5.85715	5.76219	5.76282	5.7109	5.71084	5.66123	5.66149	5.62178	5.6231	5.59582	5.59337
20.9	5.85656	5.85714	5.76377	5.76281	5.71218	5.71083	5.66644	5.66148	5.62316	5.6231	5.59503	5.59336
20.95	5.85718	5.85713	5.76292	5.76279	5.71163	5.71082	5.66158	5.66148	5.62433	5.6231	5.59509	5.59336
21	5.85442	5.85712	5.76346	5.76277	5.71259	5.71081	5.66012	5.66147	5.62287	5.6231	5.59627	5.59336
21.05	5.85672	5.85711	5.76598	5.76276	5.71147	5.7108	5.66136	5.66147	5.62194	5.6231	5.59618	5.59336
21.1	5.8563	5.85711	5.76592	5.76274	5.71074	5.71079	5.66048	5.66146	5.62219	5.6231	5.59434	5.59336
21.15	5.85727	5.8571	5.76483	5.76273	5.7126	5.71078	5.66166	5.66146	5.62306	5.6231	5.59811	5.59336
21.2	5.8559	5.85709	5.76352	5.76271	5.71256	5.71078	5.6628	5.66145	5.62375	5.6231	5.59607	5.59335
21.25	5.85718	5.85708	5.76237	5.76269	5.71021	5.71077	5.66271	5.66145	5.62226	5.6231	5.59611	5.59335
21.3	5.85846	5.85707	5.76279	5.76268	5.71204	5.71076	5.66468	5.66144	5.6225	5.6231	5.59329	5.59335
21.35	5.85728	5.85706	5.76353	5.76266	5.7105	5.71075	5.6597	5.66144	5.62323	5.6231	5.59588	5.59335
21.4	5.85754	5.85705	5.76201	5.76265	5.71192	5.71074	5.66407	5.66144	5.62333	5.62309	5.5946	5.59335
21.45	5.85584	5.85704	5.76419	5.76263	5.71147	5.71074	5.66369	5.66143	5.62298	5.62309	5.5948	5.59335
21.5	5.85682	5.85703	5.76238	5.76262	5.71293	5.71073	5.65901	5.66143	5.6232	5.62309	5.59513	5.59335
21.55	5.85478	5.85702	5.76107	5.7626	5.71151	5.71072	5.66416	5.66142	5.62298	5.62309	5.59496	5.59334
21.6	5.85637	5.85701	5.76321	5.76259	5.71073	5.71071	5.66423	5.66142	5.62423	5.62309	5.59497	5.59334
21.65	5.85561	5.857	5.76223	5.76257	5.71333	5.71071	5.66147	5.66141	5.62322	5.62309	5.59477	5.59334
21.7	5.85644	5.85699	5.76001	5.76256	5.71066	5.7107	5.66247	5.66141	5.6223	5.62309	5.59666	5.59334
21.75	5.85538	5.85698	5.76241	5.76254	5.71243	5.71069	5.6635	5.66141	5.62401	5.62309	5.59515	5.59334
21.8	5.85631	5.85697	5.76328	5.76253	5.7114	5.71068	5.66717	5.6614	5.62314	5.62309	5.59457	5.59334
21.85	5.8582	5.85696	5.76325	5.76251	5.71084	5.71068	5.66321	5.6614	5.62284	5.62309	5.59395	5.59334
21.9	5.85718	5.85695	5.76119	5.7625	5.71193	5.71067	5.66241	5.66139	5.62347	5.62309	5.5953	5.59334
21.95	5.85509	5.85694	5.76231	5.76248	5.71062	5.71066	5.66457	5.66139	5.62205	5.62309	5.59526	5.59333
22	5.85764	5.85693	5.76345	5.76247	5.71256	5.71066	5.66136	5.66139	5.62482	5.62309	5.59471	5.59333
22.05	5.85748	5.85692	5.76357	5.76245	5.71092	5.71065	5.66272	5.66138	5.62363	5.62309	5.59564	5.59333
22.1	5.85732	5.85691	5.76149	5.76244	5.71255	5.71064	5.66285	5.66138	5.62415	5.62309	5.59583	5.59333
22.15	5.85589	5.8569	5.76242	5.76243	5.71339	5.71064	5.6624	5.66138	5.62391	5.62308	5.59538	5.59333
22.2	5.85686	5.85689	5.76251	5.76241	5.71216	5.71063	5.66259	5.66137	5.62326	5.62308	5.59541	5.59333
22.25	5.85547	5.85688	5.76193	5.7624	5.7123	5.71062	5.66322	5.66137	5.62228	5.62308	5.595	5.59333
22.3	5.85698	5.85687	5.76149	5.76238	5.71111	5.71061	5.66024	5.66136	5.62429	5.62308	5.5955	5.59333
22.35	5.85573	5.85686	5.76233	5.76237	5.71234	5.71061	5.65954	5.66136	5.62125	5.62308	5.59433	5.59333
22.4	5.85541	5.85685	5.76201	5.76236	5.71219	5.7106	5.66067	5.66136	5.62189	5.62308	5.59425	5.59332
22.45	5.8557	5.85684	5.76185	5.76234	5.71086	5.7106	5.66224	5.66135	5.62167	5.62308	5.59326	5.59332
22.5	5.85699	5.85684	5.76205	5.76233	5.71019	5.71059	5.66269	5.66135	5.62151	5.62308	5.59438	5.59332
22.55	5.85563	5.85683	5.76166	5.76232	5.71273	5.71058	5.66382	5.66135	5.62237	5.62308	5.59541	5.59332
22.6	5.85441	5.85682	5.76139	5.7623	5.71192	5.71058	5.66121	5.66134	5.62373	5.62308	5.59396	5.59332
22.65	5.85566	5.85681	5.76215	5.76229	5.70978	5.71057	5.66057	5.66134	5.62388	5.62308	5.59364	5.59332
22.7	5.85535	5.8568	5.76002	5.76228	5.71126	5.71056	5.66373	5.66134	5.62345	5.62308	5.59274	5.59332
22.75	5.85531	5.85679	5.7607	5.76227	5.71046	5.71056	5.66045	5.66133	5.62319	5.62308	5.59399	5.59332
22.8	5.85502	5.85678	5.76222	5.76225	5.71107	5.71055	5.65955	5.66133	5.62201	5.62308	5.59453	5.59332
22.85	5.8545	5.85677	5.76256	5.76224	5.71141	5.71055	5.66352	5.66133	5.6221	5.62308	5.59393	5.59332
[truncated: 563 more rows]

## Sheet: WT Residuals
WT	M2B 15HPZ.GFP
[truncated: 2,001 more rows]

## Sheet: E525K Traces&Fits
E525K	M2B 15HPZ.GFP	mix with Cy3ATP
[truncated: 1,981 more rows]

## Sheet: E525k Residuals
E525K	M2B 15HPZ.GFP
[truncated: 1,981 more rows]

## Sheet: WT Summary
WT 15HP	Total Amp
[truncated: 33 more rows]

[truncated: 1 more sheets: E525k Summary]
