# Supplementary material for: Dilated cardiomyopathy mutation E525K in human beta-cardiac myosin stabilizes the interacting-heads motif and super-relaxed state of myosin
Source: eLife journal article supplement (doi:10.7554/elife.77415), 2022-11-08
Supplement: fig4-figsupp1-data1 [file Figure 4 supp 1 spectra.xlsx]

## Sheet: Sheet1
Donor	Fluorescence					Acceptor	Fluorescence	Corrected
Wavelength	Donor only	D+A (20 KCl)	D+A (150 KCl)			Wavelength	Cy3ATP alone	D+A (20 KCl)	D+A (150 KCl)
480	253053	218834	233000			480	1020.28	-5112.92	1666.67
481	274587	234709	259000			481	1300.45	-8120.3	3298.67
482	315259	274117	300000			482	1010.27	-4975.78	-2304.53
483	373321	323623	349000			483	1010.27	-6809.06	-3646.09
484	434581	376158	405000			484	940.234	-8458.47	-3836.44
485	506918	431923	471000			485	930.229	-16279.8	760.969
486	579802	503522	545000			486	840.187	-9726.34	-2117.94
487	672665	578855	629000			487	700.13	-16259.9	3146.5
488	760649	667536	711000			488	740.145	-6243.06	-4161
489	866936	743133	816000			489	680.123	-23670.9	-6476.19
490	972616	846327	922000			490	730.141	-14752.7	268.125
491	1100000	935878	1030000			491	650.112	-35095.1	-17831.1
492	1220000	1048039	1150000			492	740.145	-31818.9	-4261.69
493	1360000	1165714	1280000			493	680.123	-36135.5	-5022.75
494	1490000	1285703	1410000			494	790.165	-33290.6	-11677.3
495	1640000	1406557	1550000			495	850.191	-40076	-8287.13
496	1770000	1520416	1680000			496	790.165	-46346.9	-16847
497	1910000	1667614	1830000			497	580.089	-26598.8	1560.38
498	2050000	1780672	1940000			498	820.178	-30830.4	-11270.5
499	2180000	1888049	2090000			499	820.178	-45012	910.875
500	2310000	2008091	2200000			500	660.115	-35875.8	-9403.88
501	2410000	2095402	2320000			501	780.161	-38167.3	3243.88
502	2510000	2195784	2410000			502	810.174	-23937.6	-3548.75
503	2580000	2270121	2490000			503	740.145	-14933.3	-9717.5
504	2640000	2315933	2560000			504	790.165	-18943.3	5072.75
505	2700000	2376686	2610000			505	770.157	-14505	1170.25
506	2700000	2405359	2630000			506	860.196	9033	-1702.5
507	2730000	2408392	2640000			507	840.187	-9751.5	-15151.5
508	2700000	2413859	2650000			508	830.183	22454	14553.8
509	2680000	2357282	2610000			509	770.157	-15457	5422
510	2620000	2322725	2570000			510	800.17	276.75	5088.25
511	2540000	2260819	2500000			511	850.191	6986	6443.5
512	2490000	2193862	2420000			512	870.201	-11459.1	-3777
513	2370000	2113044	2330000			513	840.187	8862.25	7807.38
514	2260000	2015556	2220000			514	950.239	8540.75	-1162.38
515	2150000	1910336	2110000			515	900.215	5965.5	2789
516	2040000	1800834	2010000			516	1090.31	-5960.5	11099.4
517	1930000	1704820	1890000			517	970.249	-6843.63	5085.63
518	1810000	1616419	1790000			518	820.178	9421.63	7501
519	1720000	1507975	1670000			519	1110.33	-12551	-2466.88
520	1620000	1430691	1590000			520	900.215	-2275	6930.13
521	1520000	1342793	1490000			521	670.119	-5441.13	6035.25
522	1440000	1266256	1400000			522	870.201	-12870	-671
523	1360000	1208313	1320000			523	960.244	3398.5	-4259.88
524	1290000	1138312	1260000			524	1010.27	-7342	125.375
525	1230000	1080859	1190000			525	1040.29	-7722	-6984.75
526	1170000	1031990	1140000			526	940.234	-3410.63	-16535.1
527	1110000	989041	1090000			527	1010.27	1720.63	2668.25
528	1070000	940320	1030000			528	1110.33	-9268.81	-4187.88
529	1030000	890772	992000			529	1300.45	-19829.1	-3882.38
530	979838	866508	949000			530	1160.36	-1847.81	-12837
531	949676	825816	916000			531	1300.45	-14919.6	-6947.19
532	920719	796678	886000			532	1530.62	-18169.9	-122.188
533	884818	768945	850000			533	1800.86	-14342.6	-8166.19
534	850505	745695	826000			534	2281.38	-7634.25	-6057.25
535	824450	716456	791000			535	2491.64	-13388.3	-8426.19
536	800229	695299	770000			536	3202.71	-13097.4	-4910.88
537	771975	670724	744000			537	3473.19	-12659.1	-13268.4
538	753446	653671	724000			538	4545.47	-13247.8	-4720.94
539	725393	631220	699000			539	5076.82	-10988	-6309.19
540	697797	611171	676000			540	6180.1	-6857.5	-10242.9
541	676887	596827	657000			541	6681.8	-2934.31	-205.625
542	659690	577134	633000			542	8197.75	-7101.69	-6349.13
543	634245	563035	613000			543	9745.07	814.375	-1576.31
544	603915	539867	600000			544	11857.1	4293.66	5903.19
545	590932	528225	572000			545	13044.9	4167.16	-6181.47
546	567674	509318	556000			546	15533.5	5766.5	9142
547	537874	486518	537000			547	17541	9150.81	11802.7
548	513787	472443	516000			548	21501.5	15962.9	13555.7
549	486960	461119	502000			549	22037.6	27625.2	19399.1
550	463764	447973	479000			550	25277.6	34567.9	24338.9
551	442111	431987	468000			551	27924.4	37570.1	34821.9
552	411644	418296	451000			552	31326.9	50037.1	41664.3
553	394734	408514	433000			553	33747.8	54911.8	42641.2
554	366016	390562	422000			554	36548.9	61937.3	53387.8
555	349725	378117	405000			555	36977.1	63805.4	57692.8
556	329597	361990	389000			556	41355.9	65409	64825.1
557	307266	354616	371000			557	41509.2	77039.8	62549.5
558	292445	338044	361000			558	42940.5	73822.5	69800.3
559	272610	327657	345000			559	44475.1	80558.4	68692.7
560	250835	315934	333000			560	45017.6	87653.7	71059.7
561	236946	301705	316000			561	45242.9	85857.4	73443.6
562	223000	288864	300000			562	43298.4	85408.2	71526.2
563	209621	275037	288000			563	43042.7	83566.4	71776.4
564	197890	264703	273000			564	43165.5	83625	71112.3
565	186125	249148	262000			565	41386.6	78824.1	71383.3
566	173640	237223	244000			566	40232.2	78019.5	61944
567	164158	223592	231000			567	37711.3	73124.9	61817.7
568	154947	210548	223000			568	36314.5	68556.1	61885
569	147305	200826	211000			569	35071.5	65794.6	62142.3
570	140583	191169	199000			570	32486.1	62331	57182.7
571	131999	178752	185000			571	31306.5	57827.4	52889.5
572	125092	172927	178000			572	30209	58106.8	49830.1
573	116605	158941	168000			573	27518.5	52053.7	48721.9
574	109411	151756	160000			574	27173.6	51297	46888.1
575	104499	141612	149000			575	25034.4	45874.4	43525.4
576	97684.8	138348	143000			576	22826.8	48473.3	39841
577	96087.3	126790	133000			577	21268.9	38976.1	36187.9
578	89919.2	119857	128000			578	20915	37603.8	35013.7
579	84146	115439	121000			579	19894.1	38258.9	33905.2
580	82611.4	108498	114000			580	17823.6	33032.6	30683.9
581	77608.6	101646	107000			581	17682.3	30768.8	28998.4
582	73023.4	95699.8	103000			582	17298.8	29006	27831.5
583	69464.5	93654.3	97000			583	15775.5	30044.4	26652.1
584	65415.4	88521.1	93200			584	14374.4	28598.4	24450.9
585	62706.8	83478.2	86000			585	14183	26124.2	20095.6
586	60879.1	80311.6	84600			586	13306.7	24675.9	22420
587	56270.8	76407.1	80900			587	12964.3	24844.5	22624
588	52937.4	73151.6	77200			588	11987.9	24562.6	21695.8
589	51858.3	68376.9	72800			589	12058.3	20987.2	19321.1
590	48809.3	66820.9	71700			590	11555.2	22060.7	22196.7
591	46390	63844.4	65500			591	11374.1	21281.6	19398.5
592	44331.8	60608.2	63600			592	10991.9	19959.4	19129.9
593	41039.2	58618.4	60500			593	10911.4	20829	18913.4
594	39272.5	55576.8	58200			594	10710.3	19447.1	18016.6
595	37079.1	53186.1	56900			595	10217.6	19029	16727
596	36487.8	51258	53400			596	9523.95	17714.3	16886.1
597	33106.7	50634	51700			597	9513.9	19936.2	17736.1
598	31265.9	47265.2	48500			598	9795.33	18309.5	15676.5
599	30178.5	44425.7	46700			599	9513.9	16553	15893.7
600	27680.8	43127.4	44600			600	9312.9	17410.3	16529.9
601	25885.8	42353.1	43900			601	9423.44	18175.2	16121.3
602	24051.9	40424.2	41500			602	9353.1	17891.1	14820.8
603	23039.4	40086.5	39700			603	9031.54	18415.2	15574
604	21653.2	35484.9	37200			604	8217.84	15256.7	14329.9
605	20278.1	34550.6	35800			605	7826.18	15523.1	13583.6
606	19075.7	34105.3	33900			606	8197.75	16104.1	13111.8
607	18732.3	31988.8	33000			607	7705.69	14407.2	13947.9
608	16955.7	30448.9	31400			608	7585.2	14439.8	12980.3
609	16310	29256.9	30300			609	7826.18	13859.4	13006.7
610	15039.6	27123.8	28900			610	6792.19	12916.4	11865.7
611	14555.8	27480.9	28100			611	7364.33	13652.4	12579.5
612	13689.4	24765.8	24800			612	6471.07	11829	10546.6
613	12380.4	23047.7	24400			613	6260.36	11306.6	10857.4
614	12128.8	22183.8	22300			614	5518.05	10706.5	8898.22
615	10790.7	20726.9	21700			615	5417.76	10452.8	9252.75
616	10137.1	19497.3	19700			616	5688.56	9843.89	8331
617	10167.3	18667.2	18600			617	5247.28	9041.57	8320.81
618	8720.08	16835.9	17500			618	4766.01	8527.79	7974.28
619	8870.78	16566.7	16100			619	4144.54	8150.64	6694.19
620	8529.21	15113.7	15800			620	4144.54	7073.54	6590.42
621	7575.16	14253.2	14300			621	4114.48	7059.58	6105.22
622	7474.76	14457.5	14200			622	3974.18	7334.26	6493.32
623	6611.55	12909.2	12400			623	3623.47	6600.95	5320.64
624	6099.84	12737.3	12400			624	3122.58	6864.66	5265.85
625	6160.03	11544.8	11300			625	3052.47	5698.01	4740.54
