# Supplementary material for: Dilated cardiomyopathy mutation E525K in human beta-cardiac myosin stabilizes the interacting-heads motif and super-relaxed state of myosin
Source: eLife journal article supplement (doi:10.7554/elife.77415), 2022-11-08
Supplement: fig4-figsupp2-data1 [file Figure 4 supp 2 amps.xlsx]

## Sheet: Sheet1
WT	20 mM KCl						E525K	20 mM KCl
[Cy3ATP]	A-Fast	A-Fast (error)	A-Slow	A-Slow (error)			[Cy3ATP]	A-Fast	A-Fast (error)	A-Slow	A-Slow (error)
0.25	0.032	0.001	0.0136	0.002			0.25	0.075	0.00035
0.5	0.0695	0.003	0.044	0.003			0.5	0.0515	0.002	0.105	0.002
1	0.092	0.002	0.043	0.002			1	0.039	0.00115	0.105	0.0014
1.5	0.091	0.002	0.047	0.002			1.5	0.0339	0.00144	0.0982	0.0014
2	0.088	0.0011	0.056	0.001			2	0.0265	0.0007	0.106	0.000604
2.5	0.0905	0.001	0.057	0.0007			2.5	0.029	0.0008	0.118	0.0006
WT	150 mM KCl						E525K	150 mM KCl
[Cy3ATP]	A-Fast	A-Fast (error)	A-Slow	A-Slow (error)			[Cy3ATP]	A-Fast	A-Fast (error)	A-Slow	A-Slow (error)
0.25	0.008	0.00034	0.0136				0.25	0.008	0.00034
0.5	0.022	0.0004	0.044				0.5	0.022	0.0004
1	0.042	0.0004	0.043				1	0.042	0.0004
1.5	0.0379	0.000897	0.0094	0.003			1.5	0.0379	0.000897	0.0094	0.003
2	0.0355	0.0015	0.0069	0.0014			2	0.0355	0.0015	0.0069	0.0014
2.5	0.04	0.0014	0.0107	0.0012			2.5	0.04	0.0014	0.0107	0.0012
