# Supplementary material for: Dilated cardiomyopathy mutation E525K in human beta-cardiac myosin stabilizes the interacting-heads motif and super-relaxed state of myosin
Source: eLife journal article supplement (doi:10.7554/elife.77415), 2022-11-08
Supplement: fig4-figsupp4-data1 [file Figure 4 supp 4 simulations.xlsx]

## Sheet: Sheet1
WT	20 mM KCl			WT	150 mM KCl				E525K	20 mM KCl			E525K	150 mM KCl
Time	Data	Simulation		Time	Data	Simulation			Time	Simulation	Data		Time	Simulation	Data
0.001	0.05904			0.001	0.02665				0.000838	0.229167			0.001	0.311913
0.002	0.07254			0.002	0.05349				0.000936	0.229169			0.001115	0.311873
0.003	0.13039			0.003	0.10753				0.001046	0.227942			0.001244	0.312302
0.004	0.13448			0.004	0.13948				0.001169	0.228417			0.001388	0.311308
0.005	0.13043			0.005	0.13282				0.001306	0.228729			0.001548	0.309809
0.006	0.14336			0.006	0.12454				0.00146	0.228775			0.001727	0.310256
0.007	0.12059			0.007	0.1161				0.001631	0.229053			0.001927	0.308946
0.008	0.14298			0.008	0.13042				0.001823	0.229011			0.002149	0.309425
0.009	0.15224			0.009	0.16972				0.002037	0.231324			0.002397	0.310602
0.01	0.16476			0.01	0.16476				0.002276	0.227859			0.002674	0.309026
0.011	0.14506			0.011	0.16162				0.002544	0.229053			0.002983	0.311841
0.012	0.14986			0.012	0.14732				0.002843	0.230505			0.003327	0.310172
0.013	0.16435			0.013	0.14075				0.003177	0.230133			0.003712	0.311514
0.014	0.1531			0.014	0.14512				0.00355	0.229144			0.00414	0.310384
0.015	0.15592			0.015	0.15726				0.003967	0.230452			0.004619	0.311093
0.016	0.15672			0.016	0.16068				0.004433	0.228464			0.005152	0.310615
0.017	0.15898			0.017	0.16708				0.004954	0.229695			0.005747	0.310681
0.018	0.1616			0.018	0.16365				0.005536	0.230089			0.006411	0.310071
0.019	0.15986			0.019	0.1517				0.006186	0.229712			0.007151	0.309788
0.02	0.16579			0.02	0.1646				0.006913	0.229398			0.007977	0.310651
0.021	0.15875			0.021	0.14749				0.007725	0.228502			0.008898	0.310494
0.022	0.16538			0.022	0.15949				0.008632	0.228158			0.009926	0.308719
0.023	0.1536			0.023	0.14875				0.009647	0.22922			0.011072	0.310208
0.024	0.15991			0.024	0.14461				0.01078	0.229966			0.01235	0.30905
0.025	0.16669			0.025	0.15517				0.012046	0.230352			0.013777	0.3093
0.026	0.1827			0.026	0.15682				0.013462	0.228135			0.015368	0.310367
0.027	0.16766			0.027	0.16184				0.015043	0.228722			0.017143	0.309689
0.028	0.15814			0.028	0.15739				0.01681	0.230877			0.019122	0.309356
0.029	0.16308			0.029	0.15517				0.018785	0.228377			0.021331	0.30914
0.03	0.15398			0.03	0.15158				0.020992	0.228445			0.023794	0.30793
0.031	0.1553			0.031	0.16092				0.023459	0.228754			0.026542	0.309782
0.032	0.15802			0.032	0.16103				0.026215	0.228179			0.029607	0.311025
0.033	0.15576			0.033	0.15273				0.029295	0.227357			0.033026	0.308501
0.034	0.168			0.034	0.15632				0.032736	0.227746			0.036841	0.308969
0.035	0.17042			0.035	0.15848				0.036582	0.226974			0.041095	0.308729
0.036	0.16939			0.036	0.13924				0.04088	0.226467			0.045841	0.309239
0.037	0.16451			0.037	0.16065				0.045683	0.22777			0.051135	0.307658
0.038	0.15444			0.038	0.15648				0.05105	0.226523			0.057041	0.310387
0.039	0.16817			0.039	0.15899				0.057048	0.222922			0.063628	0.309304
0.04	0.15343			0.04	0.14659				0.06375	0.224013			0.070976	0.307386
0.041	0.16377			0.041	0.15668				0.07124	0.221939			0.079173	0.306205
0.042	0.15296			0.042	0.16016				0.079609	0.222919			0.088316	0.305082
0.043	0.16189			0.043	0.16009				0.088962	0.219667			0.098516	0.305894
0.044	0.14763			0.044	0.16202				0.099414	0.219782			0.109893	0.30412
0.045	0.15946			0.045	0.16239				0.111093	0.218003			0.122584	0.304873
0.046	0.15911			0.046	0.16198				0.124145	0.215589			0.136741	0.301842
0.047	0.154			0.047	0.14862				0.13873	0.213807			0.152533	0.300074
0.048	0.15143			0.048	0.15875				0.155029	0.212199			0.170149	0.298865
0.049	0.15766			0.049	0.14645				0.173242	0.210147			0.189798	0.297229
0.05	0.15855			0.05	0.16233				0.193596	0.204655			0.211718	0.293694
0.051	0.15533			0.051	0.1618				0.21634	0.205609			0.236168	0.290459
0.052	0.1654			0.052	0.16517				0.241757	0.200455			0.263443	0.289403
0.053	0.1629			0.053	0.15439				0.27016	0.197145			0.293867	0.285462
0.054	0.16112			0.054	0.15814				0.301899	0.194122			0.327804	0.283939
0.055	0.14492			0.055	0.14611				0.337368	0.189538			0.365662	0.279151
0.056	0.16186			0.056	0.15828				0.377004	0.184682			0.407891	0.276651
0.057	0.14204			0.057	0.15865				0.421296	0.180358			0.454997	0.269318
0.058	0.15955			0.058	0.15466				0.470792	0.177369			0.507543	0.265767
0.059	0.16326			0.059	0.16658				0.526102	0.171264			0.566157	0.259231
0.06	0.1653			0.06	0.1665				0.587912	0.165789			0.631541	0.254843
0.061	0.15449			0.061	0.15078				0.656982	0.162985			0.704475	0.250272
0.062	0.15821			0.062	0.1527				0.734168	0.157293			0.785833	0.243724
0.063	0.15486			0.063	0.1597				0.820421	0.150839			0.876586	0.235897
0.064	0.15616			0.064	0.15031				0.916808	0.146439			0.977821	0.228063
0.065	0.16342			0.065	0.15836				1.02452	0.14003			1.09075	0.220726
0.066	0.15329			0.066	0.1682				1.14488	0.133558			1.21671	0.210817
0.067	0.15969			0.067	0.16951				1.27939	0.129049			1.35723	0.201141
0.068	0.15154			0.068	0.15613				1.4297	0.124504			1.51397	0.191493
0.069	0.16232			0.069	0.14804				1.59767	0.12073			1.68881	0.182002
0.07	0.16312			0.07	0.14511				1.78537	0.116406			1.88385	0.171819
0.071	0.15822			0.071	0.1539				1.99512	0.112256			2.10141	0.160201
0.072	0.14473			0.072	0.15553				2.22952	0.107774			2.34409	0.147077
0.073	0.15571			0.073	0.15529				2.49146	0.103297			2.6148	0.137161
0.074	0.15906			0.074	0.15109				2.78416	0.101084			2.91678	0.124705
0.075	0.15817			0.075	0.15588				3.11126	0.09574			3.25363	0.113599
0.076	0.15682			0.076	0.15755				3.47679	0.091738			3.62938	0.1017
0.077	0.15024			0.077	0.15818				3.88526	0.090182			4.04852	0.089042
0.078	0.13929			0.078	0.16414				4.34172	0.085682			4.51608	0.078278
0.079	0.1364			0.079	0.15596				4.8518	0.081312			5.03762	0.067837
0.08	0.15357			0.08	0.16207				5.42181	0.077315			5.6194	0.059323
0.081	0.1505			0.081	0.15918				6.05879	0.074339			6.26837	0.047304
0.082	0.14618			0.082	0.15116				6.77061	0.071254			6.99228	0.039104
0.083	0.15798			0.083	0.16219				7.56606	0.066041			7.7998	0.033428
0.084	0.14563			0.084	0.1505				8.45495	0.060003			8.70057	0.026837
0.085	0.13966			0.085	0.15443				9.44828	0.056085			9.70537	0.019937
0.086	0.14762			0.086	0.16121				10.5583	0.053185			10.8262	0.015463
0.087	0.15021			0.087	0.16886				11.7988	0.049368			12.0765	0.012644
0.088	0.15985			0.088	0.16158				13.1849	0.044341			13.4712	0.007703
0.089	0.15604			0.089	0.15817				14.734	0.036602			15.0269	0.00547
0.09	0.1612			0.09	0.15411				16.465	0.032258			16.7623	0.003782
0.091	0.16076			0.091	0.15377				18.3994	0.029056			18.6982	0.003809
0.092	0.16018			0.092	0.15743				20.561	0.023212			20.8575	0.001235
0.093	0.15647			0.093	0.17176				22.9766	0.021629			23.2663	0.002816
0.094	0.15843			0.094	0.16021				25.676	0.017115			25.9533	0.0017
0.095	0.16047			0.095	0.1664				28.6926	0.013486			28.9505	0.002085
0.096	0.15329			0.096	0.16142				32.0635	0.009952			32.2939	0.001458
0.097	0.14892			0.097	0.16527				35.8305	0.008322			36.0235	0.001447
0.098	0.16168			0.098	0.14802				40.04	0.006005			40.1837	0.00075
0.099	0.14746			0.099	0.15377				44.7441	0.004656			44.8244	-0.00085
0.1	0.15236			0.1	0.14745				50.0008	0.002999			50.001	0.001763
0.101	0.14384			0.101	0.17019				0.002		0.098433		0.002		0.105124
0.102	0.14685			0.102	0.16073				0.003		0.175167		0.003		0.230979
0.103	0.14629			0.103	0.1552				0.004		0.196543		0.004		0.25
0.104	0.14517			0.104	0.15356				0.005		0.170432		0.005		0.249615
0.105	0.12873			0.105	0.1476				0.006		0.197798		0.006		0.262207
0.106	0.14619			0.106	0.16506				0.007		0.208866		0.007		0.240682
0.107	0.14358			0.107	0.16417				0.008		0.223243		0.008		0.250578
0.108	0.14566			0.108	0.16104				0.009		0.254165		0.009		0.279182
0.109	0.13565			0.109	0.16668				0.01		0.25		0.01		0.3479
0.11	0.14983			0.11	0.15157				0.011		0.247071		0.011		0.32115
0.111	0.14657			0.111	0.15302				0.012		0.240244		0.012		0.300876
0.112	0.13398			0.112	0.15767				0.013		0.240092		0.013		0.294159
0.113	0.14691			0.113	0.16145				0.014		0.254317		0.014		0.310315
0.114	0.1428			0.114	0.1491				0.015		0.24129		0.015		0.32688
0.115	0.1469			0.115	0.15175				0.016		0.255135		0.016		0.30261
0.116	0.14581			0.116	0.14924				0.017		0.255306		0.017		0.333189
0.117	0.14522			0.117	0.14997				0.018		0.286437		0.018		0.314408
0.118	0.14401			0.118	0.15859				0.019		0.241766		0.019		0.317249
0.119	0.15216			0.119	0.15867				0.02		0.278659		0.02		0.326712
0.12	0.14274			0.12	0.14329				0.021		0.250114		0.021		0.317827
0.121	0.14604			0.121	0.14885				0.022		0.274133		0.022		0.271285
0.122	0.12893			0.122	0.14186				0.023		0.260155		0.023		0.312145
0.123	0.14561			0.123	0.14878				0.024		0.24032		0.024		0.304681
0.124	0.13906			0.124	0.14944				0.025		0.2531		0.025		0.336006
0.125	0.13768			0.125	0.16486				0.026		0.25504		0.026		0.322908
0.126	0.1334			0.126	0.15554				0.027		0.247433		0.027		0.306149
0.127	0.13848			0.127	0.14933				0.028		0.234653		0.028		0.301527
0.128	0.13414			0.128	0.15367				0.029		0.246178		0.029		0.302779
0.129	0.14216			0.129	0.1683				0.03		0.262989		0.03		0.316118
0.13	0.1413			0.13	0.16999				0.031		0.264187		0.031		0.328542
0.131	0.13184			0.131	0.15105				0.032		0.244447		0.032		0.300997
0.132	0.1258			0.132	0.15478				0.033		0.242602		0.033		0.329096
0.133	0.15041			0.133	0.15438				0.034		0.273867		0.034		0.300323
0.134	0.13093			0.134	0.15246				0.035		0.26974		0.035		0.301117
0.135	0.12806			0.135	0.15063				0.036		0.25755		0.036		0.317803
0.136	0.13417			0.136	0.15187				0.037		0.26122		0.037		0.322763
0.137	0.12785			0.137	0.1577				0.038		0.253328		0.038		0.310532
0.138	0.13977			0.138	0.15821				0.039		0.244143		0.039		0.339184
0.139	0.13297			0.139	0.1441				0.04		0.246501		0.04		0.310604
0.14	0.13381			0.14	0.14746				0.041		0.240187		0.041		0.342098
0.141	0.14384			0.141	0.16994				0.042		0.240644		0.042		0.325677
0.142	0.12973			0.142	0.15748				0.043		0.252624		0.043		0.315347
0.143	0.13765			0.143	0.16283				0.044		0.244428		0.044		0.302321
0.144	0.13534			0.144	0.15547				0.045		0.244124		0.045		0.31424
0.145	0.1391			0.145	0.15403				0.046		0.262589		0.046		0.315299
0.146	0.12946			0.146	0.15664				0.047		0.263369		0.047		0.306029
0.147	0.13892			0.147	0.15746				0.048		0.25523		0.048		0.341062
0.148	0.13052			0.148	0.16005				0.049		0.248098		0.049		0.358711
0.149	0.13738			0.149	0.16181				0.05		0.257778		0.05		0.279881
0.15	0.12341			0.15	0.14647				0.051		0.249125		0.051		0.32599
0.151	0.1371			0.151	0.15093				0.052		0.229709		0.052		0.315203
0.152	0.13176			0.152	0.1527				0.053		0.239769		0.053		0.309328
0.153	0.13448			0.153	0.15404				0.054		0.263578		0.054		0.289102
0.154	0.13071			0.154	0.16362				0.055		0.236612		0.055		0.312169
0.155	0.13371			0.155	0.1551				0.056		0.240625		0.056		0.312675
0.156	0.13537			0.156	0.16701				0.057		0.257036		0.057		0.311134
0.157	0.13014			0.157	0.14519				0.058		0.253138		0.058		0.322667
0.158	0.14881			0.158	0.13827				0.059		0.242678		0.059		0.317442
0.159	0.12958			0.159	0.15334				0.06		0.237068		0.06		0.341785
0.16	0.13255			0.16	0.14846				0.061		0.25639		0.061		0.301358
0.161	0.13744			0.161	0.15784				0.062		0.256922		0.062		0.320355
0.162	0.131			0.162	0.16439				0.063		0.2527		0.063		0.300756
0.163	0.13328			0.163	0.15721				0.064		0.259166		0.064		0.292859
0.164	0.14198			0.164	0.15286				0.065		0.243591		0.065		0.299432
0.165	0.13801			0.165	0.1486				0.066		0.251559		0.066		0.299311
0.166	0.13985			0.166	0.15453				0.067		0.253975		0.067		0.322258
0.167	0.12604			0.167	0.14724				0.068		0.237335		0.068		0.309328
0.168	0.12953			0.168	0.14806				0.069		0.244295		0.069		0.344337
0.169	0.11654			0.169	0.14449				0.07		0.266526		0.07		0.333839
0.17	0.12741			0.17	0.15457				0.071		0.246691		0.071		0.293701
0.171	0.1383			0.171	0.15552				0.072		0.222121		0.072		0.291149
0.172	0.11981			0.172	0.15992				0.073		0.236403		0.073		0.325291
0.173	0.12243			0.173	0.15435				0.074		0.279058		0.074		0.288091
0.174	0.13222			0.174	0.15725				0.075		0.246824		0.075		0.320187
0.175	0.13518			0.175	0.14636				0.076		0.245778		0.076		0.324882
0.176	0.12825			0.176	0.1732				0.077		0.236003		0.077		0.304512
0.177	0.1289			0.177	0.16092				0.078		0.256789		0.078		0.291992
0.178	0.12456			0.178	0.15113				0.079		0.225106		0.079		0.347804
0.179	0.12923			0.179	0.15466				0.08		0.24401		0.08		0.328686
0.18	0.13808			0.18	0.1562				0.081		0.262285		0.081		0.30326
0.181	0.12346			0.181	0.16539				0.082		0.243439		0.082		0.308316
0.182	0.11773			0.182	0.15795				0.083		0.230184		0.083		0.351247
0.183	0.1202			0.183	0.1507				0.084		0.225544		0.084		0.310026
0.184	0.13054			0.184	0.15259				0.085		0.226666		0.085		0.300876
0.185	0.13828			0.185	0.15004				0.086		0.254564		0.086		0.314047
0.186	0.13226			0.186	0.16348				0.087		0.228301		0.087		0.333357
0.187	0.12192			0.187	0.16108				0.088		0.232105		0.088		0.32847
0.188	0.12846			0.188	0.15859				0.089		0.250171		0.089		0.321102
0.189	0.12664			0.189	0.16059				0.09		0.230488		0.09		0.345059
0.19	0.11815			0.19	0.16359				0.091		0.238438		0.091		0.27834
0.191	0.11607			0.191	0.15293				0.092		0.236726		0.092		0.317659
0.192	0.13251			0.192	0.14966				0.093		0.242773		0.093		0.324713
0.193	0.12713			0.193	0.16465				0.094		0.224118		0.094		0.302995
0.194	0.12089			0.194	0.15731				0.095		0.237601		0.095		0.346745
0.195	0.11888			0.195	0.16429				0.096		0.226932		0.096		0.311615
0.196	0.12954			0.196	0.15998				0.097		0.255363		0.097		0.283372
0.197	0.13296			0.197	0.15279				0.098		0.230279		0.098		0.299408
0.198	0.12502			0.198	0.16587				0.099		0.245284		0.099		0.306125
0.199	0.12227			0.199	0.15267				0.1		0.250647		0.1		0.298059
0.2	0.12757			0.2	0.16855				0.101		0.235642		0.101		0.322185
0.201	0.10835			0.201	0.17016				0.102		0.246444		0.102		0.297698
0.202	0.12646			0.202	0.16233				0.103		0.216986		0.103		0.330444
0.203	0.13181			0.203	0.15591				0.104		0.250038		0.104		0.307377
0.204	0.12361			0.204	0.16064				0.105		0.240054		0.105		0.323919
0.205	0.11775			0.205	0.15342				0.106		0.249201		0.106		0.322667
0.206	0.12827			0.206	0.16134				0.107		0.22271		0.107		0.275643
0.207	0.11715			0.207	0.15527				0.108		0.227864		0.108		0.318164
0.208	0.11707			0.208	0.14208				0.109		0.225734		0.109		0.335404
0.209	0.12576			0.209	0.15196				0.11		0.226076		0.11		0.291269
0.21	0.13009			0.21	0.16133				0.111		0.248155		0.111		0.320765
0.211	0.12396			0.211	0.1617				0.112		0.229842		0.112		0.321511
0.212	0.12012			0.212	0.15508				0.113		0.224422		0.113		0.27728
0.213	0.11708			0.213	0.14971				0.114		0.231743		0.114		0.322498
0.214	0.11702			0.214	0.14971				0.115		0.233322		0.115		0.307642
0.215	0.10725			0.215	0.1432				0.116		0.24496		0.116		0.302008
0.216	0.13123			0.216	0.15643				0.117		0.250247		0.117		0.344313
0.217	0.11798			0.217	0.15422				0.118		0.216302		0.118		0.326856
0.218	0.11058			0.218	0.14843				0.119		0.239445		0.119		0.341351
0.219	0.12638			0.219	0.14934				0.12		0.23066		0.12		0.289102
0.22	0.11859			0.22	0.14335				0.121		0.221988		0.121		0.324978
0.221	0.12132			0.221	0.15981				0.122		0.226913		0.122		0.318116
0.222	0.11481			0.222	0.15004				0.123		0.220276		0.123		0.333213
0.223	0.13061			0.223	0.15676				0.124		0.229385		0.124		0.30273
0.224	0.12433			0.224	0.14586				0.125		0.241842		0.125		0.304344
0.225	0.12361			0.225	0.14894				0.126		0.230488		0.126		0.276245
0.226	0.11956			0.226	0.16136				0.127		0.22195		0.127		0.315684
0.227	0.12539			0.227	0.15245				0.128		0.220409		0.128		0.337258
0.228	0.13066			0.228	0.15512				0.129		0.225924		0.129		0.342868
0.229	0.11872			0.229	0.16484				0.13		0.267382		0.13		0.318887
0.23	0.10089			0.23	0.15324				0.131		0.259623		0.131		0.328229
0.231	0.11741			0.231	0.1581				0.132		0.246919		0.132		0.310267
0.232	0.12681			0.232	0.16139				0.133		0.220371		0.133		0.330324
0.233	0.11191			0.233	0.15816				0.134		0.223756		0.134		0.298661
0.234	0.11707			0.234	0.15272				0.135		0.213183		0.135		0.324352
0.235	0.1216			0.235	0.14708				0.136		0.226209		0.136		0.29139
0.236	0.12294			0.236	0.15565				0.137		0.227617		0.137		0.29387
0.237	0.12436			0.237	0.15743				0.138		0.219668		0.138		0.304994
0.238	0.12131			0.238	0.14895				0.139		0.247623		0.139		0.303549
0.239	0.11964			0.239	0.16181				0.14		0.225601		0.14		0.29895
0.24	0.11746			0.24	0.15478				0.141		0.217252		0.141		0.324906
0.241	0.11104			0.241	0.14983				0.142		0.227655		0.142		0.281012
0.242	0.12613			0.242	0.16045				0.143		0.218679		0.143		0.303549
0.243	0.12971			0.243	0.14928				0.144		0.241823		0.144		0.293509
0.244	0.11569			0.244	0.15988				0.145		0.224422		0.145		0.334321
0.245	0.11555			0.245	0.15415				0.146		0.226248		0.146		0.296085
0.246	0.12009			0.246	0.15186				0.147		0.230964		0.147		0.291486
0.247	0.11429			0.247	0.13843				0.148		0.226723		0.148		0.328999
0.248	0.11934			0.248	0.14224				0.149		0.230279		0.149		0.338751
0.249	0.11836			0.249	0.15277				0.15		0.205842		0.15		0.306487
0.25	0.11716			0.25	0.14737				0.151		0.226438		0.151		0.314769
0.251	0.11997			0.251	0.15213				0.152		0.225468		0.152		0.295218
0.252	0.11289			0.252	0.13883				0.153		0.230564		0.153		0.29777
0.253	0.10651			0.253	0.16849				0.154		0.225411		0.154		0.285346
0.254	0.10629			0.254	0.15306				0.155		0.213107		0.155		0.295218
0.255	0.11843			0.255	0.16048				0.156		0.222767		0.156		0.302851
0.256	0.11282			0.256	0.15697				0.157		0.228415		0.157		0.291847
0.257	0.11505			0.257	0.14802				0.158		0.225354		0.158		0.31424
0.258	0.10615			0.258	0.14289				0.159		0.211718		0.159		0.265771
0.259	0.11177			0.259	0.15889				0.16		0.205157		0.16		0.312049
0.26	0.11523			0.26	0.15487				0.161		0.220333		0.161		0.30627
0.261	0.12573			0.261	0.15452				0.162		0.23026		0.162		0.342314
0.262	0.11615			0.262	0.15098				0.163		0.219363		0.163		0.289175
0.263	0.12443			0.263	0.14388				0.164		0.212118		0.164		0.298613
0.264	0.11823			0.264	0.15296				0.165		0.232827		0.165		0.291847
0.265	0.10891			0.265	0.14898				0.166		0.22524		0.166		0.285635
0.266	0.10161			0.266	0.15705				0.167		0.216416		0.167		0.282914
0.267	0.10158			0.267	0.14784				0.168		0.210273		0.168		0.290667
0.268	0.10797			0.268	0.14152				0.169		0.227883		0.169		0.28578
0.269	0.12144			0.269	0.15535				0.17		0.23258		0.17		0.31944
0.27	0.12696			0.27	0.16265				0.171		0.225544		0.171		0.311567
0.271	0.11055			0.271	0.15938				0.172		0.213506		0.172		0.29936
0.272	0.11341			0.272	0.15521				0.173		0.226951		0.173		0.30627
0.273	0.10468			0.273	0.14325				0.174		0.209208		0.174		0.314986
0.274	0.10587			0.274	0.15206				0.175		0.21265		0.175		0.331142
0.275	0.11661			0.275	0.15115				0.176		0.230203		0.176		0.32623
0.276	0.11589			0.276	0.16566				0.177		0.209474		0.177		0.306174
0.277	0.11737			0.277	0.14253				0.178		0.232314		0.178		0.31802
0.278	0.11741			0.278	0.14863				0.179		0.218717		0.179		0.296446
0.279	0.11338			0.279	0.14603				0.18		0.240358		0.18		0.314095
0.28	0.12363			0.28	0.14469				0.181		0.235243		0.181		0.301767
0.281	0.10913			0.281	0.14557				0.182		0.216625		0.182		0.30822
0.282	0.12109			0.282	0.15179				0.183		0.206127		0.183		0.298758
0.283	0.11874			0.283	0.16523				0.184		0.228568		0.184		0.334272
0.284	0.11724			0.284	0.15118				0.185		0.210178		0.185		0.302249
0.285	0.1154			0.285	0.14533				0.186		0.213145		0.186		0.314577
0.286	0.12527			0.286	0.15587				0.187		0.210292		0.187		0.297794
0.287	0.1199			0.287	0.14792				0.188		0.194051		0.188		0.325604
0.288	0.11305			0.288	0.1549				0.189		0.212441		0.189		0.313132
0.289	0.10006			0.289	0.1383				0.19		0.212669		0.19		0.304512
0.29	0.11076			0.29	0.1485				0.191		0.19757		0.191		0.299047
0.291	0.11166			0.291	0.15418				0.192		0.194546		0.192		0.291486
0.292	0.11179			0.292	0.16054				0.193		0.208143		0.193		0.301406
0.293	0.11413			0.293	0.15241				0.194		0.194337		0.194		0.319007
0.294	0.12209			0.294	0.15791				0.195		0.19776		0.195		0.329312
0.295	0.10808			0.295	0.14608				0.196		0.220561		0.196		0.324545
0.296	0.10052			0.296	0.15991				0.197		0.212308		0.197		0.302417
0.297	0.11665			0.297	0.15754				0.198		0.216283		0.198		0.316575
0.298	0.10868			0.298	0.16055				0.199		0.193557		0.199		0.307089
0.299	0.11912			0.299	0.15992				0.2		0.221588		0.2		0.293051
0.3	0.1206			0.3	0.1569				0.201		0.223091		0.201		0.30639
0.301	0.10495			0.301	0.16234				0.202		0.204131		0.202		0.285635
0.302	0.10319			0.302	0.14848				0.203		0.215655		0.203		0.301888
0.303	0.09449			0.303	0.13756				0.204		0.202628		0.204		0.300371
0.304	0.11008			0.304	0.16549				0.205		0.207078		0.205		0.293773
0.305	0.11165			0.305	0.14734				0.206		0.217462		0.206		0.325339
0.306	0.10278			0.306	0.16094				0.207		0.195345		0.207		0.294135
0.307	0.11072			0.307	0.15173				0.208		0.203845		0.208		0.302755
0.308	0.11893			0.308	0.15778				0.209		0.216264		0.209		0.308605
0.309	0.11781			0.309	0.15077				0.21		0.213981		0.21		0.302706
0.31	0.12108			0.31	0.15209				0.211		0.205709		0.211		0.306511
0.311	0.10118			0.311	0.14736				0.212		0.209341		0.212		0.318405
0.312	0.11683			0.312	0.14544				0.213		0.185874		0.213		0.260907
0.313	0.10592			0.313	0.15539				0.214		0.218108		0.214		0.316936
0.314	0.10186			0.314	0.15502				0.215		0.215275		0.215		0.29086
0.315	0.09792			0.315	0.14085				0.216		0.215579		0.216		0.294399
0.316	0.10145			0.316	0.16017				0.217		0.202001		0.217		0.295724
0.317	0.11954			0.317	0.14559				0.218		0.204435		0.218		0.293966
0.318	0.11058			0.318	0.14934				0.219		0.214609		0.219		0.265747
0.319	0.11579			0.319	0.15311				0.22		0.238057		0.22		0.304897
0.32	0.10589			0.32	0.1424				0.221		0.20299		0.221		0.315106
0.321	0.12067			0.321	0.1393				0.222		0.226362		0.222		0.287561
0.322	0.10255			0.322	0.15633				0.223		0.199376		0.223		0.328277
0.323	0.11365			0.323	0.15543				0.224		0.217081		0.224		0.325749
0.324	0.1083			0.324	0.14857				0.225		0.214761		0.225		0.286189
0.325	0.11023			0.325	0.14799				0.226		0.21362		0.226		0.298011
0.326	0.09211			0.326	0.14526				0.227		0.190476		0.227		0.297048
0.327	0.10983			0.327	0.1491				0.228		0.219021		0.228		0.298132
0.328	0.10443			0.328	0.14953				0.229		0.197551		0.229		0.300563
0.329	0.10453			0.329	0.14898				0.23		0.206413		0.23		0.308509
0.33	0.10867			0.33	0.14479				0.231		0.205747		0.231		0.273211
0.331	0.11033			0.331	0.14695				0.232		0.18867		0.232		0.314673
0.332	0.10262			0.332	0.16086				0.233		0.186958		0.233		0.292425
0.333	0.09509			0.333	0.15188				0.234		0.198007		0.234		0.271766
0.334	0.1037			0.334	0.15453				0.235		0.197703		0.235		0.30497
0.335	0.10933			0.335	0.15671				0.236		0.202457		0.236		0.287634
0.336	0.10488			0.336	0.15386				0.237		0.201563		0.237		0.326832
0.337	0.09396			0.337	0.15533				0.238		0.200061		0.238		0.309761
0.338	0.11444			0.338	0.15154				0.239		0.214038		0.239		0.289271
0.339	0.09924			0.339	0.15807				0.24		0.198711		0.24		0.270587
0.34	0.10367			0.34	0.15821				0.241		0.188555		0.241		0.286695
0.341	0.09604			0.341	0.147				0.242		0.212099		0.242		0.276678
0.342	0.10525			0.342	0.13986				0.243		0.185703		0.243		0.294544
0.343	0.10601			0.343	0.13814				0.244		0.207002		0.244		0.304271
0.344	0.1043			0.344	0.1606				0.245		0.192245		0.245		0.28773
0.345	0.10428			0.345	0.15149				0.246		0.197532		0.246		0.270875
0.346	0.10849			0.346	0.14706				0.247		0.202571		0.247		0.292883
0.347	0.09136			0.347	0.15983				0.248		0.202628		0.248		0.278797
0.348	0.11117			0.348	0.14748				0.249		0.191541		0.249		0.297289
0.349	0.10018			0.349	0.15016				0.25		0.198026		0.25		0.308292
0.35	0.10818			0.35	0.15991				0.251		0.23975		0.251		0.311591
0.351	0.09936			0.351	0.14589				0.252		0.193823		0.252		0.317346
0.352	0.09493			0.352	0.13901				0.253		0.205557		0.253		0.324978
0.353	0.09498			0.353	0.15258				0.254		0.208752		0.254		0.279038
0.354	0.12115			0.354	0.14237				0.255		0.193671		0.255		0.284985
0.355	0.09556			0.355	0.15474				0.256		0.193842		0.256		0.299047
0.356	0.10161			0.356	0.15707				0.257		0.184296		0.257		0.30379
0.357	0.10144			0.357	0.14827				0.258		0.204245		0.258		0.279423
0.358	0.10038			0.358	0.14468				0.259		0.202913		0.259		0.310821
0.359	0.10061			0.359	0.15669				0.26		0.209836		0.26		0.291582
0.36	0.09001			0.36	0.14787				0.261		0.189487		0.261		0.25732
0.361	0.10333			0.361	0.15094				0.262		0.186521		0.262		0.288236
0.362	0.09651			0.362	0.14899				0.263		0.179256		0.263		0.287706
0.363	0.10022			0.363	0.16086				0.264		0.211072		0.264		0.277569
0.364	0.09649			0.364	0.15356				0.265		0.184999		0.265		0.312169
0.365	0.10241			0.365	0.15095				0.266		0.198197		0.266		0.289199
0.366	0.10572			0.366	0.15984				0.267		0.186083		0.267		0.308028
0.367	0.10928			0.367	0.15611				0.268		0.20763		0.268		0.317707
0.368	0.10129			0.368	0.14598				0.269		0.202647		0.269		0.288597
0.369	0.09364			0.369	0.15012				0.27		0.198159		0.27		0.304657
0.37	0.09742			0.37	0.14404				0.271		0.193386		0.271		0.297385
0.371	0.09997			0.371	0.15051				0.272		0.19795		0.272		0.297554
0.372	0.08409			0.372	0.14737				0.273		0.184524		0.273		0.257922
0.373	0.10395			0.373	0.14889				0.274		0.195288		0.274		0.294496
0.374	0.09059			0.374	0.14727				0.275		0.181652		0.275		0.297361
0.375	0.09203			0.375	0.15207				0.276		0.188746		0.276		0.257175
0.376	0.10547			0.376	0.15856				0.277		0.16621		0.277		0.296831
0.377	0.10666			0.377	0.16122				0.278		0.188175		0.278		0.328036
0.378	0.09612			0.378	0.13808				0.279		0.191883		0.279		0.295218
0.379	0.10362			0.379	0.12781				0.28		0.19291		0.28		0.301238
0.38	0.0986			0.38	0.14979				0.281		0.206203		0.281		0.322932
0.381	0.09917			0.381	0.14754				0.282		0.177697		0.282		0.28171
0.382	0.0976			0.382	0.15606				0.283		0.187034		0.283		0.319224
0.383	0.1033			0.383	0.15096				0.284		0.212042		0.284		0.284865
0.384	0.10169			0.384	0.15232				0.285		0.184809		0.285		0.287947
0.385	0.10215			0.385	0.15527				0.286		0.196295		0.286		0.262352
0.386	0.08537			0.386	0.15001				0.287		0.207915		0.287		0.313228
0.387	0.09822			0.387	0.15359				0.288		0.20744		0.288		0.290812
0.388	0.09338			0.388	0.14874				0.289		0.199224		0.289		0.291679
0.389	0.1121			0.389	0.15224				0.29		0.193557		0.29		0.269575
0.39	0.09818			0.39	0.1539				0.291		0.212308		0.291		0.304368
0.391	0.08242			0.391	0.14618				0.292		0.176594		0.292		0.301791
0.392	0.08935			0.392	0.136				0.293		0.208333		0.293		0.280507
0.393	0.09606			0.393	0.14469				0.294		0.209588		0.294		0.294568
0.394	0.10332			0.394	0.13678				0.295		0.164822		0.295		0.278243
0.395	0.09853			0.395	0.14483				0.296		0.200498		0.296		0.288862
0.396	0.1068			0.396	0.14994				0.297		0.201354		0.297		0.254214
0.397	0.10105			0.397	0.1428				0.298		0.195211		0.298		0.288982
0.398	0.1041			0.398	0.16073				0.299		0.184124		0.299		0.287369
0.399	0.10052			0.399	0.14893				0.3		0.194527		0.3		0.304175
0.4	0.08917			0.4	0.16661				0.301		0.199129		0.301		0.291342
0.401	0.08339			0.401	0.15952				0.302		0.198045		0.302		0.27598
0.402	0.09882			0.402	0.14539				0.303		0.185132		0.303		0.280651
0.403	0.08887			0.403	0.14776				0.304		0.192188		0.304		0.25549
0.404	0.0899			0.404	0.15104				0.305		0.184999		0.305		0.286261
0.405	0.10806			0.405	0.15497				0.306		0.198977		0.306		0.276124
0.406	0.09279			0.406	0.14485				0.307		0.185589		0.307		0.311519
0.407	0.10671			0.407	0.15017				0.308		0.179484		0.308		0.296711
0.408	0.10134			0.408	0.15075				0.309		0.203028		0.309		0.295603
0.409	0.09757			0.409	0.1522				0.31		0.195554		0.31		0.290451
0.41	0.10434			0.41	0.15051				0.311		0.195611		0.311		0.270105
0.411	0.09338			0.411	0.14939				0.312		0.189811		0.312		0.269214
0.412	0.09623			0.412	0.1556				0.313		0.184429		0.313		0.301767
0.413	0.10444			0.413	0.15835				0.314		0.208219		0.314		0.293942
0.414	0.09796			0.414	0.15795				0.315		0.183516		0.315		0.289536
0.415	0.09716			0.415	0.15232				0.316		0.19717		0.316		0.275498
0.416	0.09535			0.416	0.15772				0.317		0.168568		0.317		0.280025
0.417	0.09232			0.417	0.13928				0.318		0.185646		0.318		0.329168
0.418	0.09992			0.418	0.15284				0.319		0.196105		0.319		0.278508
0.419	0.09449			0.419	0.13573				0.32		0.179332		0.32		0.267336
0.42	0.09541			0.42	0.15015				0.321		0.208314		0.321		0.257512
0.421	0.09166			0.421	0.14761				0.322		0.185608		0.322		0.291293
0.422	0.09475			0.422	0.14175				0.323		0.185456		0.323		0.281181
0.423	0.09571			0.423	0.15018				0.324		0.178705		0.324		0.265049
0.424	0.10464			0.424	0.15451				0.325		0.193424		0.325		0.291799
0.425	0.10766			0.425	0.14974				0.326		0.189487		0.326		0.288356
0.426	0.10508			0.426	0.15353				0.327		0.193329		0.327		0.262713
0.427	0.0936			0.427	0.14935				0.328		0.199738		0.328		0.270562
0.428	0.09657			0.428	0.15728				0.329		0.190742		0.329		0.302466
0.429	0.09475			0.429	0.15011				0.33		0.181918		0.33		0.290692
0.43	0.0815			0.43	0.15021				0.331		0.186863		0.331		0.271188
0.431	0.08689			0.431	0.14883				0.332		0.163168		0.332		0.302971
0.432	0.0997			0.432	0.1575				0.333		0.169519		0.333		0.296157
0.433	0.09657			0.433	0.15212				0.334		0.223129		0.334		0.298661
0.434	0.09172			0.434	0.15946				0.335		0.170451		0.335		0.310026
0.435	0.09875			0.435	0.14587				0.336		0.180093		0.336		0.264182
0.436	0.08902			0.436	0.1458				0.337		0.207497		0.337		0.289199
0.437	0.08436			0.437	0.15774				0.338		0.172486		0.338		0.2872
0.438	0.09396			0.438	0.15161				0.339		0.177887		0.339		0.290764
0.439	0.09693			0.439	0.16736				0.34		0.182299		0.34		0.267192
0.44	0.1001			0.44	0.14721				0.341		0.179827		0.341		0.279664
0.441	0.10448			0.441	0.15368				0.342		0.181557		0.342		0.271453
0.442	0.11326			0.442	0.15062				0.343		0.20086		0.343		0.303019
0.443	0.09328			0.443	0.16032				0.344		0.179655		0.344		0.245786
0.444	0.09069			0.444	0.13989				0.345		0.193177		0.345		0.299552
0.445	0.09654			0.445	0.14592				0.346		0.202837		0.346		0.261606
0.446	0.09124			0.446	0.1481				0.347		0.187376		0.347		0.306294
0.447	0.0877			0.447	0.14999				0.348		0.179522		0.348		0.291221
0.448	0.09352			0.448	0.15186				0.349		0.165335		0.349		0.265964
0.449	0.08439			0.449	0.14702				0.35		0.188099		0.35		0.297313
0.45	0.0979			0.45	0.1408				0.351		0.16661		0.351		0.289247
0.451	0.09907			0.451	0.14696				0.352		0.183516		0.352		0.286382
0.452	0.09377			0.452	0.15841				0.353		0.201658		0.353		0.274704
0.453	0.09451			0.453	0.13945				0.354		0.178857		0.354		0.289464
0.454	0.09081			0.454	0.14596				0.355		0.203617		0.355		0.272537
0.455	0.09601			0.455	0.14323				0.356		0.18015		0.356		0.296326
0.456	0.08906			0.456	0.14991				0.357		0.168055		0.357		0.279832
0.457	0.09619			0.457	0.14278				0.358		0.188974		0.358		0.258548
0.458	0.0811			0.458	0.14861				0.359		0.196295		0.359		0.305668
0.459	0.09986			0.459	0.14722				0.36		0.194089		0.36		0.276389
0.46	0.09691			0.46	0.15765				0.361		0.197246		0.361		0.290282
0.461	0.09552			0.461	0.1354				0.362		0.176822		0.362		0.266397
0.462	0.09838			0.462	0.14767				0.363		0.196314		0.363		0.265121
0.463	0.08481			0.463	0.15189				0.364		0.168549		0.364		0.271598
0.464	0.09534			0.464	0.15135				0.365		0.189982		0.365		0.279592
0.465	0.09304			0.465	0.14749				0.366		0.19989		0.366		0.306703
0.466	0.08967			0.466	0.15665				0.367		0.176822		0.367		0.287152
0.467	0.09618			0.467	0.137				0.368		0.194242		0.368		0.272489
0.468	0.10229			0.468	0.15726				0.369		0.181006		0.369		0.263965
0.469	0.09694			0.469	0.15318				0.37		0.179731		0.37		0.252817
0.47	0.08777			0.47	0.15634				0.371		0.201982		0.371		0.261028
0.471	0.09027			0.471	0.15638				0.372		0.170888		0.372		0.277714
0.472	0.08541			0.472	0.1415				0.373		0.201145		0.373		0.279014
0.473	0.09322			0.473	0.15128				0.374		0.171744		0.374		0.257633
0.474	0.10268			0.474	0.1549				0.375		0.1877		0.375		0.290427
0.475	0.09295			0.475	0.14634				0.376		0.190077		0.376		0.286791
0.476	0.0886			0.476	0.15863				0.377		0.164385		0.377		0.278653
0.477	0.097			0.477	0.15016				0.378		0.184372		0.378		0.291847
0.478	0.09303			0.478	0.15093				0.379		0.168606		0.379		0.249157
0.479	0.10308			0.479	0.14379				0.38		0.181766		0.38		0.249133
0.48	0.08327			0.48	0.14528				0.381		0.195402		0.381		0.28891
0.481	0.10487			0.481	0.14728				0.382		0.172182		0.382		0.284937
0.482	0.09196			0.482	0.14934				0.383		0.182299		0.383		0.288428
0.483	0.10884			0.483	0.1588				0.384		0.168245		0.384		0.300058
0.484	0.09371			0.484	0.15455				0.385		0.172771		0.385		0.283227
0.485	0.07711			0.485	0.14182				0.386		0.205253		0.386		0.300804
0.486	0.07838			0.486	0.15359				0.387		0.180093		0.387		0.292401
0.487	0.07647			0.487	0.14483				0.388		0.173855		0.388		0.284094
0.488	0.0901			0.488	0.14773				0.389		0.160315		0.389		0.286863
0.489	0.09136			0.489	0.14319				0.39		0.173817		0.39		0.284672
0.49	0.09407			0.49	0.15141				0.391		0.186197		0.391		0.285154
0.491	0.07425			0.491	0.15421				0.392		0.174654		0.392		0.307353
0.492	0.08393			0.492	0.15511				0.393		0.180606		0.393		0.258764
0.493	0.1015			0.493	0.1572				0.394		0.173437		0.394		0.306607
0.494	0.07738			0.494	0.15449				0.395		0.181842		0.395		0.267167
0.495	0.08646			0.495	0.1438				0.396		0.188308		0.396		0.267408
0.496	0.08917			0.496	0.14281				0.397		0.180815		0.397		0.277882
0.497	0.09097			0.497	0.15373				0.398		0.173171		0.398		0.257512
0.498	0.09372			0.498	0.14556				0.399		0.159744		0.399		0.283685
0.499	0.09192			0.499	0.13887				0.4		0.157595		0.4		0.286358
0.5	0.09293			0.5	0.13581				0.401		0.183516		0.401		0.278171
0.501	0.07953			0.501	0.14313				0.402		0.162996		0.402		0.283733
0.502	0.08843			0.502	0.14696				0.403		0.191902		0.403		0.273717
0.503	0.09433			0.503	0.15682				0.404		0.168017		0.404		0.293605
0.504	0.08948			0.504	0.1518				0.405		0.175186		0.405		0.280362
0.505	0.09082			0.505	0.15671				0.406		0.200822		0.406		0.304801
0.506	0.07982			0.506	0.14617				0.407		0.191085		0.407		0.280049
0.507	0.08456			0.507	0.13709				0.408		0.184543		0.408		0.276245
0.508	0.09283			0.508	0.14458				0.409		0.180435		0.409		0.287224
0.509	0.09571			0.509	0.15073				0.41		0.156721		0.41		0.262617
0.51	0.07731			0.51	0.14305				0.411		0.151168		0.411		0.277112
0.511	0.08325			0.511	0.13597				0.412		0.173342		0.412		0.284792
0.512	0.0847			0.512	0.15155				0.413		0.180739		0.413		0.223587
0.513	0.09752			0.513	0.14822				0.414		0.183021		0.414		0.290764
0.514	0.08747			0.514	0.15001				0.415		0.1784		0.415		0.273187
0.515	0.08328			0.515	0.15525				0.416		0.192853		0.416		0.273572
0.516	0.08821			0.516	0.13947				0.417		0.203256		0.417		0.289006
0.517	0.10044			0.517	0.14973				0.418		0.166781		0.418		0.258668
0.518	0.09278			0.518	0.15653				0.419		0.185874		0.419		0.291679
0.519	0.09727			0.519	0.14008				0.42		0.1726		0.42		0.283829
0.52	0.08538			0.52	0.15095				0.421		0.155066		0.421		0.278556
0.521	0.07435			0.521	0.16075				0.422		0.191199		0.422		0.27533
0.522	0.08156			0.522	0.14534				0.423		0.172847		0.423		0.28761
0.523	0.08011			0.523	0.15442				0.424		0.183288		0.424		0.282216
0.524	0.09101			0.524	0.14986				0.425		0.16138		0.425		0.280627
0.525	0.08971			0.525	0.14342				0.426		0.171383		0.426		0.2709
0.526	0.09136			0.526	0.15271				0.427		0.162958		0.427		0.282987
0.527	0.08665			0.527	0.14127				0.428		0.172467		0.428		0.28968
0.528	0.09147			0.528	0.14644				0.429		0.194166		0.429		0.27427
0.529	0.08507			0.529	0.15379				0.43		0.178077		0.43		0.277304
0.53	0.08066			0.53	0.14689				0.431		0.172201		0.431		0.28708
0.531	0.08927			0.531	0.14079				0.432		0.143504		0.432		0.262906
0.532	0.0942			0.532	0.15651				0.433		0.180359		0.433		0.29387
0.533	0.08517			0.533	0.13386				0.434		0.157063		0.434		0.281999
0.534	0.08063			0.534	0.15314				0.435		0.173266		0.435		0.294833
0.535	0.08954			0.535	0.1537				0.436		0.167599		0.436		0.274776
0.536	0.08599			0.536	0.14395				0.437		0.159003		0.437		0.250048
0.537	0.08418			0.537	0.14733				0.438		0.174502		0.438		0.287176
0.538	0.08192			0.538	0.14816				0.439		0.169025		0.439		0.29009
0.539	0.08922			0.539	0.14723				0.44		0.175985		0.44		0.265915
0.54	0.08408			0.54	0.14157				0.441		0.167827		0.441		0.27846
0.541	0.08871			0.541	0.15176				0.442		0.166724		0.442		0.277714
0.542	0.07874			0.542	0.13981				0.443		0.171991		0.443		0.277641
0.543	0.09233			0.543	0.15807				0.444		0.18053		0.444		0.289921
0.544	0.08498			0.544	0.15463				0.445		0.174102		0.445		0.280314
0.545	0.09308			0.545	0.14876				0.446		0.1695		0.446		0.265362
0.546	0.08489			0.546	0.15594				0.447		0.198273		0.447		0.270177
0.547	0.10283			0.547	0.14457				0.448		0.187034		0.448		0.260089
0.548	0.08912			0.548	0.15044				0.449		0.150806		0.449		0.252167
0.549	0.08172			0.549	0.15578				0.45		0.172657		0.45		0.264182
0.55	0.08053			0.55	0.14764				0.451		0.176289		0.451		0.282674
0.551	0.08709			0.551	0.16231				0.452		0.170299		0.452		0.277304
0.552	0.08551			0.552	0.15186				0.453		0.154153		0.453		0.258668
0.553	0.09013			0.553	0.14364				0.454		0.171098		0.454		0.262545
0.554	0.08222			0.554	0.14838				0.455		0.160505		0.455		0.265699
0.555	0.08332			0.555	0.15553				0.456		0.176061		0.456		0.313806
0.556	0.09028			0.556	0.15277				0.457		0.159687		0.457		0.253925
0.557	0.08289			0.557	0.1409				0.458		0.167446		0.458		0.273139
0.558	0.08081			0.558	0.141				0.459		0.158413		0.459		0.286093
0.559	0.07302			0.559	0.15772				0.46		0.147688		0.46		0.277015
0.56	0.08341			0.56	0.1411				0.461		0.15248		0.461		0.295627
0.561	0.08369			0.561	0.14001				0.462		0.157082		0.462		0.256958
0.562	0.08365			0.562	0.13915				0.463		0.166362		0.463		0.262304
0.563	0.07612			0.563	0.15804				0.464		0.173094		0.464		0.286815
0.564	0.08854			0.564	0.14177				0.465		0.173418		0.465		0.265434
0.565	0.07551			0.565	0.1523				0.466		0.169995		0.466		0.248266
0.566	0.08639			0.566	0.15397				0.467		0.184048		0.467		0.28147
0.567	0.08644			0.567	0.15593				0.468		0.185437		0.468		0.271068
0.568	0.08108			0.568	0.14695				0.469		0.169824		0.469		0.258403
0.569	0.08348			0.569	0.1475				0.47		0.175053		0.47		0.276341
0.57	0.07392			0.57	0.13415				0.471		0.166438		0.471		0.289512
0.571	0.07628			0.571	0.15068				0.472		0.174768		0.472		0.268131
0.572	0.08712			0.572	0.15007				0.473		0.178077		0.473		0.256477
0.573	0.07232			0.573	0.14693				0.474		0.162274		0.474		0.28106
0.574	0.07366			0.574	0.15317				0.475		0.184581		0.475		0.262882
0.575	0.08887			0.575	0.15588				0.476		0.184448		0.476		0.267095
0.576	0.08777			0.576	0.13712				0.477		0.150255		0.477		0.227054
0.577	0.08316			0.577	0.15029				0.478		0.181443		0.478		0.279881
0.578	0.09776			0.578	0.15012				0.479		0.164328		0.479		0.281783
0.579	0.08441			0.579	0.15011				0.48		0.162863		0.48		0.226789
0.58	0.08251			0.58	0.15204				0.481		0.166496		0.481		0.286622
0.581	0.07921			0.581	0.14795				0.482		0.167694		0.482		0.269864
0.582	0.08374			0.582	0.15401				0.483		0.151415		0.483		0.270827
0.583	0.07822			0.583	0.14923				0.484		0.166039		0.484		0.276847
0.584	0.09378			0.584	0.14212				0.485		0.179941		0.485		0.24386
0.585	0.09354			0.585	0.14602				0.486		0.180815		0.486		0.250819
0.586	0.09664			0.586	0.16035				0.487		0.167104		0.487		0.274632
0.587	0.0935			0.587	0.14827				0.488		0.172581		0.488		0.292618
0.588	0.0849			0.588	0.13757				0.489		0.169329		0.489		0.25939
0.589	0.08962			0.589	0.15822				0.49		0.160277		0.49		0.263171
0.59	0.09062			0.59	0.15375				0.491		0.165507		0.491		0.272272
0.591	0.07784			0.591	0.14934				0.492		0.175148		0.492		0.278171
0.592	0.09196			0.592	0.14925				0.493		0.168074		0.493		0.285587
0.593	0.0803			0.593	0.14735				0.494		0.159801		0.494		0.245666
0.594	0.08331			0.594	0.1495				0.495		0.154305		0.495		0.234662
0.595	0.07092			0.595	0.14099				0.496		0.186673		0.496		0.26346
0.596	0.07653			0.596	0.15044				0.497		0.173836		0.497		0.290234
0.597	0.09329			0.597	0.14914				0.498		0.202856		0.498		0.255418
0.598	0.09033			0.598	0.15465				0.499		0.160809		0.499		0.277015
0.599	0.09764			0.599	0.13722				0.5		0.142458		0.5		0.245305
0.6	0.08334			0.6	0.14994				0.501		0.147497		0.501		0.258331
0.601	0.09023			0.601	0.1343				0.502		0.150312		0.502		0.26476
0.602	0.08668			0.602	0.13987				0.503		0.174692		0.503		0.270153
0.603	0.08344			0.603	0.14184				0.504		0.157938		0.504		0.268323
0.604	0.0797			0.604	0.14606				0.505		0.161057		0.505		0.262135
0.605	0.08471			0.605	0.13564				0.506		0.183021		0.506		0.284817
0.606	0.07507			0.606	0.14022				0.507		0.15035		0.507		0.256019
0.607	0.07816			0.607	0.15202				0.508		0.182204		0.508		0.270153
0.608	0.08485			0.608	0.14997				0.509		0.182337		0.509		0.264495
0.609	0.06622			0.609	0.1392				0.51		0.15963		0.51		0.260113
0.61	0.07777			0.61	0.14053				0.511		0.152138		0.511		0.269262
0.611	0.08796			0.611	0.13131				0.512		0.17724		0.512		0.256694
0.612	0.08159			0.612	0.13718				0.513		0.191902		0.513		0.284118
0.613	0.07514			0.613	0.146				0.514		0.154781		0.514		0.230256
0.614	0.07346			0.614	0.15686				0.515		0.170831		0.515		0.295001
0.615	0.07209			0.615	0.14324				0.516		0.163605		0.516		0.261172
0.616	0.07494			0.616	0.14586				0.517		0.194413		0.517		0.256549
0.617	0.08338			0.617	0.13548				0.518		0.18517		0.518		0.283564
0.618	0.0674			0.618	0.1318				0.519		0.177468		0.519		0.260546
0.619	0.08048			0.619	0.14603				0.52		0.166248		0.52		0.255393
0.62	0.07308			0.62	0.14859				0.521		0.168625		0.521		0.269985
0.621	0.07681			0.621	0.14753				0.522		0.179846		0.522		0.244582
0.622	0.07411			0.622	0.1467				0.523		0.177906		0.523		0.270948
0.623	0.08066			0.623	0.1414				0.524		0.165792		0.524		0.251565
0.624	0.08269			0.624	0.15365				0.525		0.163662		0.525		0.256068
0.625	0.07545			0.625	0.14113				0.526		0.163225		0.526		0.247087
0.626	0.07416			0.626	0.15115				0.527		0.164594		0.527		0.248459
0.627	0.08552			0.627	0.14477				0.528		0.191465		0.528		0.278677
0.628	0.06781			0.628	0.14802				0.529		0.178705		0.529		0.258211
0.629	0.07313			0.629	0.15026				0.53		0.166515		0.53		0.241091
0.63	0.08771			0.63	0.15272				0.531		0.185018		0.531		0.251565
0.631	0.07457			0.631	0.15022				0.532		0.160467		0.532		0.258837
0.632	0.06819			0.632	0.15164				0.533		0.163757		0.533		0.234711
0.633	0.07471			0.633	0.14835				0.534		0.170318		0.534		0.256068
0.634	0.06807			0.634	0.14739				0.535		0.138103		0.535		0.268107
0.635	0.08029			0.635	0.14406				0.536		0.167675		0.536		0.284768
0.636	0.07823			0.636	0.13881				0.537		0.186825		0.537		0.251132
0.637	0.07471			0.637	0.15463				0.538		0.166058		0.538		0.265578
0.638	0.06714			0.638	0.13709				0.539		0.153317		0.539		0.29883
0.639	0.08501			0.639	0.15257				0.54		0.165564		0.54		0.277641
0.64	0.08055			0.64	0.13394				0.541		0.177792		0.541		0.239671
0.641	0.0789			0.641	0.14587				0.542		0.144702		0.542		0.261991
0.642	0.07842			0.642	0.14551				0.543		0.159459		0.543		0.281951
0.643	0.06732			0.643	0.13918				0.544		0.168283		0.544		0.280892
0.644	0.07302			0.644	0.15717				0.545		0.162711		0.545		0.255971
0.645	0.08724			0.645	0.14606				0.546		0.169177		0.546		0.263026
0.646	0.07659			0.646	0.14888				0.547		0.149798		0.547		0.269383
0.647	0.07646			0.647	0.14921				0.548		0.157957		0.548		0.269503
0.648	0.08032			0.648	0.14733				0.549		0.163852		0.549		0.264784
0.649	0.07467			0.649	0.15112				0.55		0.157595		0.55		0.256621
0.65	0.06062			0.65	0.13447				0.551		0.16408		0.551		0.269551
0.651	0.06855			0.651	0.12929				0.552		0.162084		0.552		0.256044
0.652	0.08199			0.652	0.14387				0.553		0.15132		0.553		0.255706
0.653	0.08558			0.653	0.14893				0.554		0.159003		0.554		0.275595
0.654	0.07873			0.654	0.14766				0.555		0.174768		0.555		0.260185
0.655	0.0824			0.655	0.14736				0.556		0.174197		0.556		0.272922
0.656	0.07703			0.656	0.14183				0.557		0.162103		0.557		0.25496
0.657	0.07507			0.657	0.14771				0.558		0.175643		0.558		0.284696
0.658	0.07265			0.658	0.15591				0.559		0.172923		0.559		0.245835
0.659	0.06896			0.659	0.14159				0.56		0.151966		0.56		0.249494
0.66	0.08568			0.66	0.15532				0.561		0.171345		0.561		0.262978
0.661	0.07133			0.661	0.13043				0.562		0.179789		0.562		0.260883
0.662	0.07879			0.662	0.14343				0.563		0.170641		0.563		0.252745
0.663	0.08491			0.663	0.1524				0.564		0.172999		0.564		0.251156
0.664	0.08246			0.664	0.14463				0.565		0.166039		0.565		0.268492
0.665	0.0783			0.665	0.15252				0.566		0.173646		0.566		0.23996
0.666	0.07594			0.666	0.14668				0.567		0.134984		0.567		0.266975
0.667	0.07471			0.667	0.1354				0.568		0.157824		0.568		0.247087
0.668	0.07426			0.668	0.15008				0.569		0.157215		0.569		0.24492
0.669	0.09045			0.669	0.15513				0.57		0.160885		0.57		0.247087
0.67	0.08022			0.67	0.13962				0.571		0.179731		0.571		0.262882
0.671	0.07237			0.671	0.13993				0.572		0.168435		0.572		0.252119
0.672	0.07368			0.672	0.13775				0.573		0.152099		0.573		0.255779
0.673	0.07236			0.673	0.15128				0.574		0.148981		0.574		0.238202
0.674	0.08012			0.674	0.14605				0.575		0.173855		0.575		0.252913
0.675	0.08128			0.675	0.15419				0.576		0.170375		0.576		0.274559
0.676	0.067			0.676	0.13719				0.577		0.163206		0.577		0.254599
0.677	0.08215			0.677	0.14807				0.578		0.175472		0.578		0.27846
0.678	0.07613			0.678	0.14123				0.579		0.161646		0.579		0.265121
0.679	0.06816			0.679	0.13833				0.58		0.154857		0.58		0.238033
0.68	0.07373			0.68	0.15257				0.581		0.165412		0.581		0.277063
0.681	0.08277			0.681	0.14971				0.582		0.161095		0.582		0.259559
0.682	0.08046			0.682	0.14222				0.583		0.16505		0.583		0.257368
0.683	0.08557			0.683	0.14325				0.584		0.160011		0.584		0.24321
0.684	0.06119			0.684	0.16094				0.585		0.1548		0.585		0.239984
0.685	0.06849			0.685	0.13603				0.586		0.158603		0.586		0.247689
0.686	0.08719			0.686	0.14079				0.587		0.159307		0.587		0.284215
0.687	0.08523			0.687	0.15169				0.588		0.131941		0.588		0.274608
0.688	0.07076			0.688	0.1387				0.589		0.16216		0.589		0.259318
0.689	0.07881			0.689	0.15982				0.59		0.152974		0.59		0.251878
0.69	0.08346			0.69	0.15723				0.591		0.149114		0.591		0.274535
0.691	0.07511			0.691	0.14658				0.592		0.17066		0.592		0.234783
0.692	0.06357			0.692	0.14046				0.593		0.163605		0.593		0.251685
0.693	0.06607			0.693	0.14653				0.594		0.169519		0.594		0.236252
0.694	0.06662			0.694	0.15377				0.595		0.156702		0.595		0.267143
0.695	0.0691			0.695	0.14341				0.596		0.157576		0.596		0.288741
0.696	0.07473			0.696	0.14547				0.597		0.142058		0.597		0.259992
0.697	0.07305			0.697	0.14671				0.598		0.170318		0.598		0.250409
0.698	0.06814			0.698	0.14479				0.599		0.159193		0.599		0.252986
0.699	0.08082			0.699	0.13903				0.6		0.156245		0.6		0.258403
0.7	0.08049			0.7	0.14653				0.601		0.157158		0.601		0.238443
0.701	0.07628			0.701	0.14988				0.602		0.161741		0.602		0.257127
0.702	0.06147			0.702	0.14758				0.603		0.189069		0.603		0.226356
0.703	0.07089			0.703	0.14876				0.604		0.156683		0.604		0.256694
0.704	0.07454			0.704	0.13969				0.605		0.155903		0.605		0.260931
0.705	0.07397			0.705	0.14974				0.606		0.16138		0.606		0.238804
0.706	0.07764			0.706	0.14276				0.607		0.129089		0.607		0.262882
0.707	0.07394			0.707	0.13921				0.608		0.157767		0.608		0.242704
0.708	0.07951			0.708	0.15374				0.609		0.16564		0.609		0.241669
0.709	0.08076			0.709	0.1368				0.61		0.161494		0.61		0.252986
0.71	0.07526			0.71	0.14458				0.611		0.148353		0.611		0.242367
0.711	0.06754			0.711	0.13777				0.612		0.157481		0.612		0.248242
0.712	0.07618			0.712	0.15096				0.613		0.160638		0.613		0.228595
0.713	0.06405			0.713	0.14701				0.614		0.153069		0.614		0.245401
0.714	0.07863			0.714	0.14495				0.615		0.154857		0.615		0.239791
0.715	0.06749			0.715	0.14714				0.616		0.142572		0.616		0.247327
0.716	0.07429			0.716	0.14399				0.617		0.144512		0.617		0.280723
0.717	0.07648			0.717	0.14597				0.618		0.142154		0.618		0.246123
0.718	0.079			0.718	0.14407				0.619		0.160733		0.619		0.221058
0.719	0.0576			0.719	0.14851				0.62		0.173094		0.62		0.258764
0.72	0.07607			0.72	0.1455				0.621		0.166476		0.621		0.269383
0.721	0.08187			0.721	0.13647				0.622		0.171668		0.622		0.227222
0.722	0.07729			0.722	0.14376				0.623		0.148562		0.623		0.265651
0.723	0.07484			0.723	0.13626				0.624		0.168816		0.624		0.254454
0.724	0.06806			0.724	0.15463				0.625		0.133653		0.625		0.264808
0.725	0.0755			0.725	0.1422				0.626		0.142971		0.626		0.27179
0.726	0.07824			0.726	0.13846				0.627		0.159117		0.627		0.24581
0.727	0.07758			0.727	0.14324				0.628		0.155713		0.628		0.233434
0.728	0.06691			0.728	0.14826				0.629		0.164537		0.629		0.23524
0.729	0.07132			0.729	0.14807				0.63		0.191636		0.63		0.244414
0.73	0.08295			0.73	0.1528				0.631		0.175776		0.631		0.244486
0.731	0.079			0.731	0.15406				0.632		0.140404		0.632		0.261533
0.732	0.07113			0.732	0.14222				0.633		0.151377		0.633		0.250843
0.733	0.06786			0.733	0.14378				0.634		0.145843		0.634		0.256983
0.734	0.07734			0.734	0.1391				0.635		0.165012		0.635		0.241332
0.735	0.07138			0.735	0.1337				0.636		0.150692		0.636		0.237552
0.736	0.07629			0.736	0.14057				0.637		0.140157		0.637		0.25248
0.737	0.0679			0.737	0.14276				0.638		0.148296		0.638		0.23943
0.738	0.08252			0.738	0.14561				0.639		0.163263		0.639		0.27651
0.739	0.07259			0.739	0.14695				0.64		0.132455		0.64		0.288958
0.74	0.06858			0.74	0.14889				0.641		0.150407		0.641		0.245088
0.741	0.07657			0.741	0.13365				0.642		0.152099		0.642		0.264519
0.742	0.08075			0.742	0.15081				0.643		0.160904		0.643		0.240802
0.743	0.07238			0.743	0.14179				0.644		0.159478		0.644		0.242801
0.744	0.06711			0.744	0.15078				0.645		0.161931		0.645		0.228547
0.745	0.08118			0.745	0.14218				0.646		0.129146		0.646		0.260065
0.746	0.08155			0.746	0.14701				0.647		0.148619		0.647		0.239791
0.747	0.07426			0.747	0.15871				0.648		0.139453		0.648		0.225079
0.748	0.08586			0.748	0.1442				0.649		0.153431		0.649		0.249831
0.749	0.07038			0.749	0.13184				0.65		0.155542		0.65		0.2624
0.75	0.07956			0.75	0.14426				0.651		0.160353		0.651		0.235505
0.751	0.06998			0.751	0.14421				0.652		0.168321		0.652		0.271839
0.752	0.0639			0.752	0.13821				0.653		0.163187		0.653		0.25366
0.753	0.07531			0.753	0.15061				0.654		0.145025		0.654		0.238972
0.754	0.07122			0.754	0.13901				0.655		0.144607		0.655		0.247881
0.755	0.06989			0.755	0.14878				0.656		0.158109		0.656		0.257488
0.756	0.07387			0.756	0.14337				0.657		0.158603		0.657		0.220192
0.757	0.07897			0.757	0.14443				0.658		0.144417		0.658		0.253202
0.758	0.06982			0.758	0.14661				0.659		0.150103		0.659		0.262472
0.759	0.07735			0.759	0.13767				0.66		0.142096		0.66		0.253539
0.76	0.07244			0.76	0.13812				0.661		0.16621		0.661		0.257199
0.761	0.06971			0.761	0.14224				0.662		0.158984		0.662		0.262882
0.762	0.06809			0.762	0.14575				0.663		0.156626		0.663		0.254888
0.763	0.06956			0.763	0.13575				0.664		0.176632		0.664		0.272344
0.764	0.07537			0.764	0.15065				0.665		0.155998		0.665		0.245233
0.765	0.07672			0.765	0.14569				0.666		0.163871		0.666		0.243379
0.766	0.07391			0.766	0.1448				0.667		0.159992		0.667		0.292281
0.767	0.07228			0.767	0.13388				0.668		0.1668		0.668		0.252384
0.768	0.07102			0.768	0.15547				0.669		0.147726		0.669		0.265121
0.769	0.06926			0.769	0.14485				0.67		0.141165		0.67		0.226958
0.77	0.06185			0.77	0.1372				0.671		0.152784		0.671		0.272176
0.771	0.06759			0.771	0.12679				0.672		0.167827		0.672		0.26175
0.772	0.07574			0.772	0.14609				0.673		0.131105		0.673		0.243234
0.773	0.0794			0.773	0.14093				0.674		0.140157		0.674		0.267336
0.774	0.06989			0.774	0.14774				0.675		0.114483		0.675		0.245233
0.775	0.08263			0.775	0.14392				0.676		0.161342		0.676		0.257272
0.776	0.07334			0.776	0.14043				0.677		0.145253		0.677		0.248965
0.777	0.05783			0.777	0.14006				0.678		0.165297		0.678		0.271911
0.778	0.08278			0.778	0.15273				0.679		0.138959		0.679		0.27403
0.779	0.06499			0.779	0.14476				0.68		0.150445		0.68		0.240032
0.78	0.07363			0.78	0.14473				0.681		0.143466		0.681		0.255706
0.781	0.06804			0.781	0.1478				0.682		0.143295		0.682		0.260305
0.782	0.06204			0.782	0.141				0.683		0.148163		0.683		0.255634
0.783	0.07508			0.783	0.14176				0.684		0.142971		0.684		0.244534
0.784	0.06427			0.784	0.13738				0.685		0.158014		0.685		0.227463
0.785	0.06609			0.785	0.1476				0.686		0.148848		0.686		0.19609
0.786	0.07582			0.786	0.13442				0.687		0.170356		0.687		0.235192
0.787	0.07805			0.787	0.14308				0.688		0.147478		0.688		0.23707
0.788	0.06841			0.788	0.13905				0.689		0.145482		0.689		0.261004
0.789	0.06917			0.789	0.14282				0.69		0.132303		0.69		0.282987
0.79	0.06977			0.79	0.15849				0.691		0.155351		0.691		0.244992
0.791	0.07188			0.791	0.15556				0.692		0.152099		0.692		0.247135
0.792	0.079			0.792	0.13497				0.693		0.181804		0.693		0.249543
0.793	0.06906			0.793	0.14699				0.694		0.137456		0.694		0.245594
0.794	0.06952			0.794	0.14739				0.695		0.164689		0.695		0.261292
0.795	0.06577			0.795	0.13559				0.696		0.153564		0.696		0.249567
0.796	0.06846			0.796	0.1354				0.697		0.149951		0.697		0.2598
0.797	0.07819			0.797	0.13901				0.698		0.136753		0.698		0.256573
0.798	0.07214			0.798	0.14548				0.699		0.171174		0.699		0.250819
0.799	0.06131			0.799	0.14413				0.7		0.146185		0.7		0.240923
0.8	0.06775			0.8	0.13565				0.701		0.171592		0.701		0.243306
0.801	0.06126			0.801	0.14033				0.702		0.134452		0.702		0.245233
0.802	0.07072			0.802	0.14669				0.703		0.128651		0.703		0.223129
0.803	0.06512			0.803	0.14774				0.704		0.141279		0.704		0.236372
0.804	0.06515			0.804	0.14958				0.705		0.159269		0.705		0.262569
0.805	0.05773			0.805	0.14682				0.706		0.147764		0.706		0.237937
0.806	0.06112			0.806	0.14284				0.707		0.148771		0.707		0.248459
0.807	0.07023			0.807	0.14396				0.708		0.140537		0.708		0.258475
0.808	0.0704			0.808	0.14342				0.709		0.149779		0.709		0.270177
0.809	0.06524			0.809	0.14481				0.71		0.142705		0.71		0.219614
0.81	0.07327			0.81	0.1321				0.711		0.151244		0.711		0.279303
0.811	0.06878			0.811	0.14178				0.712		0.153545		0.712		0.244992
0.812	0.06985			0.812	0.13977				0.713		0.148505		0.713		0.251397
0.813	0.07544			0.813	0.14818				0.714		0.132949		0.714		0.253202
0.814	0.06954			0.814	0.15749				0.715		0.159402		0.715		0.204686
0.815	0.07353			0.815	0.13985				0.716		0.158223		0.716		0.247111
0.816	0.0736			0.816	0.14916				0.717		0.153982		0.717		0.235674
0.817	0.05462			0.817	0.14133				0.718		0.140423		0.718		0.233434
0.818	0.069			0.818	0.14369				0.719		0.132284		0.719		0.228667
0.819	0.07019			0.819	0.14416				0.72		0.138521		0.72		0.23955
0.82	0.06467			0.82	0.15026				0.721		0.158546		0.721		0.224622
0.821	0.07713			0.821	0.14411				0.722		0.154096		0.722		0.243379
0.822	0.05996			0.822	0.14991				0.723		0.132493		0.723		0.244245
0.823	0.06608			0.823	0.14059				0.724		0.147592		0.724		0.234325
0.824	0.0629			0.824	0.13047				0.725		0.127529		0.725		0.241982
0.825	0.06886			0.825	0.14287				0.726		0.141431		0.726		0.237841
0.826	0.0698			0.826	0.13806				0.727		0.165164		0.727		0.218651
0.827	0.06415			0.827	0.14193				0.728		0.159041		0.728		0.238756
0.828	0.07016			0.828	0.13946				0.729		0.155979		0.729		0.234951
0.829	0.06993			0.829	0.14315				0.73		0.144398		0.73		0.228041
0.83	0.07564			0.83	0.1382				0.731		0.15615		0.731		0.2474
0.831	0.06856			0.831	0.13455				0.732		0.141412		0.732		0.223611
0.832	0.07509			0.832	0.14231				0.733		0.138825		0.733		0.254791
0.833	0.0672			0.833	0.15102				0.734		0.129811		0.734		0.243306
0.834	0.0705			0.834	0.15122				0.735		0.13099		0.735		0.226717
0.835	0.07267			0.835	0.14383				0.736		0.152594		0.736		0.259174
0.836	0.07261			0.836	0.14708				0.737		0.149646		0.737		0.269166
0.837	0.0716			0.837	0.14166				0.738		0.151187		0.738		0.235192
0.838	0.06699			0.838	0.1485				0.739		0.151567		0.739		0.257922
0.839	0.07036			0.839	0.14049				0.74		0.153069		0.74		0.230954
0.84	0.0638			0.84	0.14557				0.741		0.162312		0.741		0.242343
0.841	0.06849			0.841	0.15188				0.742		0.126103		0.742		0.250506
0.842	0.04766			0.842	0.14991				0.743		0.147611		0.743		0.254671
0.843	0.05958			0.843	0.13475				0.744		0.14919		0.744		0.241741
0.844	0.07079			0.844	0.14466				0.745		0.15731		0.745		0.222479
0.845	0.05827			0.845	0.14614				0.746		0.164613		0.746		0.214702
0.846	0.07193			0.846	0.13608				0.747		0.123707		0.747		0.24309
0.847	0.06715			0.847	0.14595				0.748		0.159725		0.748		0.242319
0.848	0.0703			0.848	0.14785				0.749		0.13565		0.749		0.23837
0.849	0.0648			0.849	0.14441				0.75		0.15828		0.75		0.266903
0.85	0.0678			0.85	0.1372				0.751		0.152042		0.751		0.224213
0.851	0.06674			0.851	0.13395				0.752		0.151225		0.752		0.253877
0.852	0.06857			0.852	0.13849				0.753		0.138369		0.753		0.260426
0.853	0.05998			0.853	0.14884				0.754		0.129868		0.754		0.252552
0.854	0.06148			0.854	0.14391				0.755		0.140613		0.755		0.260522
0.855	0.05591			0.855	0.14078				0.756		0.133615		0.756		0.23772
0.856	0.06828			0.856	0.14644				0.757		0.140575		0.757		0.263122
0.857	0.06085			0.857	0.14068				0.758		0.160144		0.758		0.226885
0.858	0.07442			0.858	0.14157				0.759		0.13951		0.759		0.239261
0.859	0.07955			0.859	0.13179				0.76		0.138806		0.76		0.260546
0.86	0.07844			0.86	0.154				0.761		0.153944		0.761		0.217591
0.861	0.06803			0.861	0.13034				0.762		0.147193		0.762		0.208803
0.862	0.06923			0.862	0.14592				0.763		0.124962		0.763		0.248146
0.863	0.0744			0.863	0.13671				0.764		0.138673		0.764		0.232592
0.864	0.0727			0.864	0.14432				0.765		0.137209		0.765		0.250265
0.865	0.07151			0.865	0.12448				0.766		0.141887		0.766		0.246798
0.866	0.06756			0.866	0.14664				0.767		0.135669		0.767		0.23512
0.867	0.06985			0.867	0.14731				0.768		0.153982		0.768		0.227343
0.868	0.06803			0.868	0.13963				0.769		0.154515		0.769		0.269888
0.869	0.06443			0.869	0.14019				0.77		0.151966		0.77		0.239647
0.87	0.07264			0.87	0.14144				0.771		0.153412		0.771		0.24947
0.871	0.0692			0.871	0.13657				0.772		0.146052		0.772		0.287489
0.872	0.0634			0.872	0.14445				0.773		0.147554		0.773		0.238009
0.873	0.07395			0.873	0.1303				0.774		0.142762		0.774		0.236661
0.874	0.06219			0.874	0.14043				0.775		0.161646		0.775		0.237263
0.875	0.07426			0.875	0.13846				0.776		0.137418		0.776		0.267769
0.876	0.06692			0.876	0.1429				0.777		0.146489		0.777		0.244968
0.877	0.06211			0.877	0.14265				0.778		0.122338		0.778		0.267769
0.878	0.07227			0.878	0.13704				0.779		0.163947		0.779		0.239526
0.879	0.05824			0.879	0.14802				0.78		0.16022		0.78		0.241308
0.88	0.06674			0.88	0.15618				0.781		0.145501		0.781		0.252071
0.881	0.06063			0.881	0.14813				0.782		0.134261		0.782		0.270875
0.882	0.07456			0.882	0.13554				0.783		0.155199		0.783		0.240489
0.883	0.07473			0.883	0.15001				0.784		0.165183		0.784		0.240875
0.884	0.06591			0.884	0.14687				0.785		0.18846		0.785		0.217471
0.885	0.06315			0.885	0.15485				0.786		0.131086		0.786		0.230569
0.886	0.06538			0.886	0.13263				0.787		0.158166		0.787		0.229413
0.887	0.06737			0.887	0.14788				0.788		0.127757		0.788		0.26057
0.888	0.0638			0.888	0.14217				0.789		0.153735		0.789		0.225778
0.889	0.07135			0.889	0.14111				0.79		0.166857		0.79		0.252624
0.89	0.05968			0.89	0.14529				0.791		0.117298		0.791		0.237841
0.891	0.07521			0.891	0.14005				0.792		0.161456		0.792		0.226115
0.892	0.06026			0.892	0.14427				0.793		0.144778		0.793		0.23955
0.893	0.06296			0.893	0.14052				0.794		0.146147		0.794		0.233916
0.894	0.06179			0.894	0.15354				0.795		0.163396		0.795		0.228619
0.895	0.06049			0.895	0.13202				0.796		0.138103		0.796		0.236227
0.896	0.06374			0.896	0.1384				0.797		0.136372		0.797		0.248772
0.897	0.06986			0.897	0.14047				0.798		0.125171		0.798		0.246461
0.898	0.06626			0.898	0.15008				0.799		0.14377		0.799		0.219566
0.899	0.07524			0.899	0.13661				0.8		0.156797		0.8		0.222527
0.9	0.07222			0.9	0.13425				0.801		0.152119		0.801		0.249205
0.901	0.06501			0.901	0.14308				0.802		0.14997		0.802		0.242054
0.902	0.06561			0.902	0.13682				0.803		0.142838		0.803		0.249109
0.903	0.07108			0.903	0.14732				0.804		0.154629		0.804		0.262545
0.904	0.06554			0.904	0.14217				0.805		0.148182		0.805		0.226548
0.905	0.07706			0.905	0.14459				0.806		0.161114		0.806		0.237118
0.906	0.07033			0.906	0.13989				0.807		0.143542		0.807		0.256645
0.907	0.06765			0.907	0.13777				0.808		0.126997		0.808		0.223346
0.908	0.05867			0.908	0.14496				0.809		0.148011		0.809		0.227198
0.909	0.06752			0.909	0.13662				0.81		0.136106		0.81		0.208586
0.91	0.06321			0.91	0.14387				0.811		0.146394		0.811		0.226115
0.911	0.06456			0.911	0.15252				0.812		0.161266		0.812		0.232158
0.912	0.07129			0.912	0.14506				0.813		0.133463		0.813		0.218434
0.913	0.06124			0.913	0.14009				0.814		0.141127		0.814		0.220625
0.914	0.06203			0.914	0.14396				0.815		0.139282		0.815		0.24516
0.915	0.0699			0.915	0.1468				0.816		0.142952		0.816		0.234398
0.916	0.07007			0.916	0.14899				0.817		0.150065		0.817		0.243692
0.917	0.04904			0.917	0.13765				0.818		0.149038		0.818		0.225296
0.918	0.06071			0.918	0.14437				0.819		0.133976		0.819		0.220071
0.919	0.05953			0.919	0.15478				0.82		0.132265		0.82		0.246918
0.92	0.06645			0.92	0.14828				0.821		0.1606		0.821		0.26057
0.921	0.06933			0.921	0.13851				0.822		0.14531		0.822		0.24256
0.922	0.06145			0.922	0.13612				0.823		0.139073		0.823		0.258259
0.923	0.06044			0.923	0.15245				0.824		0.137		0.824		0.22414
0.924	0.06731			0.924	0.14769				0.825		0.135821		0.825		0.236348
0.925	0.06212			0.925	0.1414				0.826		0.149095		0.826		0.264712
0.926	0.05956			0.926	0.14331				0.827		0.14474		0.827		0.252624
0.927	0.05069			0.927	0.13648				0.828		0.160904		0.828		0.203217
0.928	0.07408			0.928	0.14433				0.829		0.156721		0.829		0.208947
0.929	0.05447			0.929	0.15033				0.83		0.141507		0.83		0.21853
0.93	0.05778			0.93	0.14536				0.831		0.142553		0.831		0.228137
0.931	0.0456			0.931	0.14657				0.832		0.14784		0.832		0.228185
0.932	0.06671			0.932	0.14911				0.833		0.130971		0.833		0.235529
0.933	0.06146			0.933	0.13706				0.834		0.151643		0.834		0.25118
0.934	0.06097			0.934	0.13122				0.835		0.150692		0.835		0.224791
0.935	0.06077			0.935	0.1358				0.836		0.138103		0.836		0.212728
0.936	0.06191			0.936	0.14318				0.837		0.13835		0.837		0.230521
0.937	0.05412			0.937	0.13395				0.838		0.153336		0.838		0.239021
0.938	0.06453			0.938	0.14168				0.839		0.142496		0.839		0.244245
0.939	0.0656			0.939	0.14111				0.84		0.133862		0.84		0.259583
0.94	0.07013			0.94	0.14626				0.841		0.169805		0.841		0.282312
0.941	0.05321			0.941	0.13599				0.842		0.126978		0.842		0.208779
0.942	0.0589			0.942	0.14032				0.843		0.153126		0.843		0.212968
0.943	0.05079			0.943	0.14035				0.844		0.136867		0.844		0.226187
0.944	0.06135			0.944	0.14043				0.845		0.173912		0.845		0.240008
0.945	0.06359			0.945	0.14771				0.846		0.149114		0.846		0.20471
0.946	0.06162			0.946	0.14829				0.847		0.158946		0.847		0.242271
0.947	0.05677			0.947	0.142				0.848		0.149951		0.848		0.232303
0.948	0.05335			0.948	0.14214				0.849		0.149038		0.849		0.244823
0.949	0.05633			0.949	0.13837				0.85		0.131257		0.85		0.223033
0.95	0.06118			0.95	0.142				0.851		0.158318		0.851		0.254358
0.951	0.0629			0.951	0.12628				0.852		0.154248		0.852		0.23707
0.952	0.05294			0.952	0.13587				0.853		0.131447		0.853		0.246509
0.953	0.06661			0.953	0.14215				0.854		0.161551		0.854		0.208707
0.954	0.0646			0.954	0.14296				0.855		0.127111		0.855		0.238154
0.955	0.06602			0.955	0.14615				0.856		0.148201		0.856		0.207912
0.956	0.06366			0.956	0.14118				0.857		0.129716		0.857		0.227824
0.957	0.05917			0.957	0.14349				0.858		0.130914		0.858		0.251421
0.958	0.06646			0.958	0.14412				0.859		0.149722		0.859		0.209044
0.959	0.0658			0.959	0.14252				0.86		0.125989		0.86		0.23158
0.96	0.04886			0.96	0.1345				0.861		0.119561		0.861		0.225513
0.961	0.06251			0.961	0.14799				0.862		0.140043		0.862		0.231027
0.962	0.06237			0.962	0.14164				0.863		0.127738		0.863		0.223466
0.963	0.0689			0.963	0.13714				0.864		0.138787		0.864		0.245329
0.964	0.06091			0.964	0.1412				0.865		0.128347		0.865		0.198642
0.965	0.06665			0.965	0.14043				0.866		0.146109		0.866		0.240273
0.966	0.06461			0.966	0.14247				0.867		0.170299		0.867		0.221323
0.967	0.06553			0.967	0.13719				0.868		0.144854		0.868		0.22325
0.968	0.05477			0.968	0.14176				0.869		0.127339		0.869		0.207695
0.969	0.05942			0.969	0.13722				0.87		0.128651		0.87		0.228161
0.97	0.06121			0.97	0.13874				0.871		0.1459		0.871		0.244896
0.971	0.04923			0.971	0.14266				0.872		0.157614		0.872		0.214654
0.972	0.06206			0.972	0.1342				0.873		0.12112		0.873		0.238033
0.973	0.05758			0.973	0.14846				0.874		0.158337		0.874		0.25012
0.974	0.05692			0.974	0.1398				0.875		0.119884		0.875		0.221901
0.975	0.06847			0.975	0.14153				0.876		0.132968		0.876		0.227102
0.976	0.06089			0.976	0.13978				0.877		0.158641		0.877		0.203939
0.977	0.0507			0.977	0.1439				0.878		0.146813		0.878		0.243668
0.978	0.05091			0.978	0.14167				0.879		0.148068		0.879		0.210248
0.979	0.07113			0.979	0.15201				0.88		0.162958		0.88		0.242777
0.98	0.06877			0.98	0.14118				0.881		0.108512		0.881		0.204637
0.981	0.06407			0.981	0.14657				0.882		0.152936		0.882		0.231292
0.982	0.05962			0.982	0.13664				0.883		0.13778		0.883		0.232808
0.983	0.06348			0.983	0.13893				0.884		0.127815		0.884		0.223587
0.984	0.05999			0.984	0.13366				0.885		0.161171		0.885		0.235024
0.985	0.05791			0.985	0.14528				0.886		0.150806		0.886		0.209597
0.986	0.06274			0.986	0.14147				0.887		0.143466		0.887		0.23028
0.987	0.05469			0.987	0.14112				0.888		0.151795		0.888		0.210585
0.988	0.07458			0.988	0.13577				0.889		0.151054		0.889		0.241693
0.989	0.06006			0.989	0.13813				0.89		0.123403		0.89		0.207864
0.99	0.05779			0.99	0.1469				0.891		0.130895		0.891		0.239021
0.991	0.06582			0.991	0.13433				0.892		0.142096		0.892		0.215039
0.992	0.06157			0.992	0.14591				0.893		0.15132		0.893		0.236131
0.993	0.059			0.993	0.13362				0.894		0.146604		0.894		0.2141
0.994	0.04864			0.994	0.14618				0.895		0.146356		0.895		0.24309
0.995	0.06252			0.995	0.13666				0.896		0.134851		0.896		0.271092
0.996	0.05619			0.996	0.1421				0.897		0.15442		0.897		0.218699
0.997	0.0576			0.997	0.14329				0.898		0.141089		0.898		0.226789
0.998	0.05462			0.998	0.1433				0.899		0.12462		0.899		0.237865
0.999	0.05698			0.999	0.14538				0.9		0.141298		0.9		0.236035
1	0.05825			1	0.14236				0.901		0.146756		0.901		0.217278
1.05	0.05956			1.05	0.14136				0.902		0.158375		0.902		0.232182
1.1	0.05674			1.1	0.1408				0.903		0.136791		0.903		0.262256
1.15	0.05704			1.15	0.1394				0.904		0.123574		0.904		0.221155
1.2	0.05557			1.2	0.13936				0.905		0.130021		0.905		0.237455
1.25	0.05474			1.25	0.13843				0.906		0.148638		0.906		0.226669
1.3	0.05004			1.3	0.13816				0.907		0.119409		0.907		0.23813
1.35	0.05091			1.35	0.13753				0.908		0.138293		0.908		0.245594
1.4	0.04999			1.4	0.13744				0.909		0.144892		0.909		0.275065
1.45	0.04759			1.45	0.13506				0.91		0.140955		0.91		0.229967
1.5	0.04721			1.5	0.13613				0.911		0.140556		0.911		0.232736
1.55	0.04616			1.55	0.13355				0.912		0.13584		0.912		0.21788
1.6	0.04397			1.6	0.13387				0.913		0.15461		0.913		0.227608
1.65	0.04433			1.65	0.13475				0.914		0.157576		0.914		0.210079
1.7	0.04315			1.7	0.13426				0.915		0.15113		0.915		0.21853
1.75	0.04492			1.75	0.13241				0.916		0.143333		0.916		0.238804
1.8	0.04247			1.8	0.13342				0.917		0.141811		0.917		0.223827
1.85	0.0417			1.85	0.13405				0.918		0.139453		0.918		0.220312
1.9	0.04171			1.9	0.13156				0.919		0.141412		0.919		0.223033
1.95	0.03999			1.95	0.13241				0.92		0.149589		0.92		0.254647
2	0.03719			2	0.13184				0.921		0.172182		0.921		0.237407
2.05	0.0365			2.05	0.13035				0.922		0.123174		0.922		0.236059
2.1	0.03704			2.1	0.12895				0.923		0.141241		0.923		0.231219
2.15	0.03581			2.15	0.12777				0.924		0.143314		0.924		0.2291
2.2	0.03693			2.2	0.12834				0.925		0.132835		0.925		0.206708
2.25	0.03591			2.25	0.12846				0.926		0.159326		0.926		0.220408
2.3	0.03451			2.3	0.1302				0.927		0.146565		0.927		0.230377
2.35	0.03396			2.35	0.12782				0.928		0.146451		0.928		0.23199
2.4	0.03281			2.4	0.12816				0.929		0.156702		0.929		0.238515
2.45	0.03469			2.45	0.12671				0.93		0.144245		0.93		0.241501
2.5	0.03352			2.5	0.12745				0.931		0.153088		0.931		0.212968
2.55	0.03267			2.55	0.12686				0.932		0.137057		0.932		0.237744
2.6	0.03314			2.6	0.12895				0.933		0.12964		0.933		0.232231
2.65	0.03209			2.65	0.12655				0.934		0.135326		0.934		0.21593
2.7	0.03191			2.7	0.12603				0.935		0.138122		0.935		0.232206
2.75	0.03216			2.75	0.12587				0.936		0.146166		0.936		0.226452
2.8	0.03118			2.8	0.12617				0.937		0.120474		0.937		0.215352
2.85	0.03068			2.85	0.12795				0.938		0.125532		0.938		0.249133
2.9	0.03035			2.9	0.12481				0.939		0.127225		0.939		0.241284
2.95	0.02863			2.95	0.1248				0.94		0.132112		0.94		0.21357
3	0.02883			3	0.12449				0.941		0.12074		0.941		0.225079
3.05	0.02837			3.05	0.12453				0.942		0.164309		0.942		0.237455
3.1	0.02868			3.1	0.12381				0.943		0.131238		0.943		0.225778
3.15	0.02837			3.15	0.1247				0.944		0.138787		0.944		0.222696
3.2	0.02768			3.2	0.12433				0.945		0.13274		0.945		0.256164
3.25	0.02704			3.25	0.12378				0.946		0.145957		0.946		0.20288
3.3	0.02717			3.3	0.12193				0.947		0.139415		0.947		0.234325
3.35	0.02716			3.35	0.12433				0.948		0.137589		0.948		0.248941
3.4	0.02478			3.4	0.12286				0.949		0.127092		0.949		0.238346
3.45	0.02684			3.45	0.12161				0.95		0.134033		0.95		0.215256
3.5	0.02489			3.5	0.12314				0.951		0.136334		0.951		0.202735
3.55	0.0266			3.55	0.12174				0.952		0.132017		0.952		0.243427
3.6	0.02468			3.6	0.12082				0.953		0.131219		0.953		0.210199
3.65	0.02247			3.65	0.12247				0.954		0.144417		0.954		0.218675
3.7	0.02334			3.7	0.12188				0.955		0.117697		0.955		0.20548
3.75	0.02293			3.75	0.11945				0.956		0.116423		0.956		0.212439
3.8	0.0227			3.8	0.1194				0.957		0.174768		0.957		0.228306
3.85	0.02213			3.85	0.11966				0.958		0.140214		0.958		0.237118
3.9	0.02105			3.9	0.11985				0.959		0.138559		0.959		0.238419
3.95	0.02013			3.95	0.11857				0.96		0.127453		0.96		0.21345
4	0.02251			4	0.12				0.961		0.15847		0.961		0.221323
4.05	0.0203			4.05	0.12073				0.962		0.150578		0.962		0.235144
4.1	0.02025			4.1	0.11939				0.963		0.126255		0.963		0.225176
4.15	0.02164			4.15	0.11992				0.964		0.138217		0.964		0.241573
4.2	0.02111			4.2	0.11898				0.965		0.149133		0.965		0.252263
4.25	0.02134			4.25	0.11849				0.966		0.137723		0.966		0.216123
4.3	0.02158			4.3	0.11747				0.967		0.14919		0.967		0.194549
4.35	0.01899			4.35	0.11734				0.968		0.144474		0.968		0.260113
4.4	0.02079			4.4	0.11886				0.969		0.133615		0.969		0.201652
4.45	0.01945			4.45	0.11819				0.97		0.147155		0.97		0.194452
4.5	0.01918			4.5	0.11833				0.971		0.147764		0.971		0.213113
4.55	0.01983			4.55	0.11791				0.972		0.140385		0.972		0.216508
4.6	0.01941			4.6	0.11677				0.973		0.14919		0.973		0.222624
4.65	0.01964			4.65	0.11806				0.974		0.123764		0.974		0.222551
4.7	0.0191			4.7	0.11968				0.975		0.134585		0.975		0.23276
4.75	0.01916			4.75	0.11622				0.976		0.14261		0.976		0.201748
4.8	0.01972			4.8	0.11477				0.977		0.131257		0.977		0.218169
4.85	0.01769			4.85	0.11533				0.978		0.15229		0.978		0.243643
4.9	0.01871			4.9	0.11702				0.979		0.153507		0.979		0.223755
4.95	0.01959			4.95	0.11694				0.98		0.138673		0.98		0.230738
5	0.01865			5	0.11569				0.981		0.113476		0.981		0.225681
5.05	0.01607			5.05	0.11504				0.982		0.155846		0.982		0.24569
5.1	0.01735			5.1	0.11574				0.983		0.147155		0.983		0.250337
5.15	0.01739			5.15	0.11639				0.984		0.13177		0.984		0.228185
5.2	0.01709			5.2	0.11785				0.985		0.13255		0.985		0.247785
5.25	0.01782			5.25	0.11576				0.986		0.135916		0.986		0.196716
5.3	0.01819			5.3	0.1168				0.987		0.150103		0.987		0.223346
5.35	0.01902			5.35	0.11571				0.988		0.155256		0.988		0.213763
5.4	0.01832			5.4	0.11554				0.989		0.138692		0.989		0.218434
5.45	0.01679			5.45	0.11465				0.99		0.146413		0.99		0.25
5.5	0.01811			5.5	0.11736				0.991		0.136848		0.991		0.210681
5.55	0.01847			5.55	0.1163				0.992		0.135859		0.992		0.214967
5.6	0.01892			5.6	0.11315				0.993		0.12907		0.993		0.226958
5.65	0.01695			5.65	0.11446				0.994		0.128975		0.994		0.224453
5.7	0.01701			5.7	0.11472				0.995		0.160733		0.995		0.220986
5.75	0.01781			5.75	0.11592				0.996		0.134318		0.996		0.221444
5.8	0.01628			5.8	0.11314				0.997		0.159212		0.997		0.231508
5.85	0.01785			5.85	0.11452				0.998		0.155485		0.998		0.247231
5.9	0.01732			5.9	0.11569				0.999		0.136943		0.999		0.192671
5.95	0.01727			5.95	0.11396				1		0.135136		1		0.219204
6	0.01749			6	0.11326				1.05		0.139263		1.05		0.217784
6.05	0.01544			6.05	0.11547				1.1		0.131523		1.1		0.217037
6.1	0.01575			6.1	0.11514				1.15		0.133653		1.15		0.210248
6.15	0.01553			6.15	0.11464				1.2		0.131219		1.2		0.203722
6.2	0.0163			6.2	0.11286				1.25		0.131466		1.25		0.2004
6.25	0.01697			6.25	0.11413				1.3		0.125228		1.3		0.196981
6.3	0.01658			6.3	0.11477				1.35		0.126921		1.35		0.196451
6.35	0.01406			6.35	0.11481				1.4		0.128081		1.4		0.191539
6.4	0.01595			6.4	0.11478				1.45		0.125038		1.45		0.189541
6.45	0.01586			6.45	0.11365				1.5		0.125437		1.5		0.189517
6.5	0.01397			6.5	0.11357				1.55		0.121082		1.55		0.188096
6.55	0.01298			6.55	0.11351				1.6		0.120816		1.6		0.18133
6.6	0.01329			6.6	0.1143				1.65		0.122376		1.65		0.177526
6.65	0.01326			6.65	0.11369				1.7		0.120417		1.7		0.172734
6.7	0.01467			6.7	0.11307				1.75		0.117317		1.75		0.173481
6.75	0.01327			6.75	0.11301				1.8		0.120341		1.8		0.168665
6.8	0.01387			6.8	0.11278				1.85		0.117146		1.85		0.162814
6.85	0.0145			6.85	0.1138				1.9		0.114845		1.9		0.164355
6.9	0.0146			6.9	0.11417				1.95		0.113419		1.95		0.158938
6.95	0.01308			6.95	0.11246				2		0.112753		2		0.156506
7	0.0126			7	0.11395				2.05		0.110376		2.05		0.155928
7.05	0.01378			7.05	0.11307				2.1		0.111612		2.1		0.151738
7.1	0.01363			7.1	0.11451				2.15		0.109691		2.15		0.140614
7.15	0.0123			7.15	0.11263				2.2		0.112981		2.2		0.137821
7.2	0.0136			7.2	0.1141				2.25		0.10971		2.25		0.138953
7.25	0.01159			7.25	0.11349				2.3		0.110091		2.3		0.135606
7.3	0.01163			7.3	0.11229				2.35		0.108911		2.35		0.140518
7.35	0.00985			7.35	0.11267				2.4		0.11087		2.4		0.136569
7.4	0.01223			7.4	0.1127				2.45		0.108969		2.45		0.136088
7.45	0.01198			7.45	0.112				2.5		0.104233		2.5		0.127805
7.5	0.01237			7.5	0.11275				2.55		0.108683		2.55		0.130261
7.55	0.0103			7.55	0.11309				2.6		0.10661		2.6		0.128864
7.6	0.01028			7.6	0.11216				2.65		0.104538		2.65		0.127035
7.65	0.01036			7.65	0.11134				2.7		0.104804		2.7		0.126842
7.7	0.00976			7.7	0.11121				2.75		0.105793		2.75		0.123519
7.75	0.00978			7.75	0.11083				2.8		0.102731		2.8		0.120124
7.8	0.01038			7.8	0.11178				2.85		0.103891		2.85		0.115911
7.85	0.01141			7.85	0.11131				2.9		0.104633		2.9		0.121256
7.9	0.01016			7.9	0.11129				2.95		0.100677		2.95		0.115333
7.95	0.01141			7.95	0.11082				3		0.103016		3		0.107507
8	0.01121			8	0.11374				3.05		0.101552		3.05		0.109723
8.05	0.01076			8.05	0.11113				3.1		0.099954		3.1		0.114225
8.1	0.01043			8.1	0.11199				3.15		0.09908		3.15		0.106713
8.15	0.01317			8.15	0.11119				3.2		0.100449		3.2		0.110445
8.2	0.01004			8.2	0.1132				3.25		0.097406		3.25		0.10469
8.25	0.01133			8.25	0.1109				3.3		0.098566		3.3		0.101921
8.3	0.01123			8.3	0.10987				3.35		0.097558		3.35		0.103173
8.35	0.0126			8.35	0.11041				3.4		0.097596		3.4		0.100332
8.4	0.01248			8.4	0.11088				3.45		0.095219		3.45		0.096672
8.45	0.01289			8.45	0.10831				3.5		0.091511		3.5		0.098262
8.5	0.00966			8.5	0.11				3.55		0.096893		3.55		0.098984
8.55	0.01055			8.55	0.11057				3.6		0.093374		3.6		0.091833
8.6	0.01074			8.6	0.11149				3.65		0.093013		3.65		0.094433
8.65	0.0117			8.65	0.11049				3.7		0.094934		3.7		0.092507
8.7	0.01228			8.7	0.10998				3.75		0.092937		3.75		0.092603
8.75	0.00938			8.75	0.11137				3.8		0.095885		3.8		0.089569
8.8	0.01045			8.8	0.11109				3.85		0.094668		3.85		0.087715
8.85	0.01175			8.85	0.1117				3.9		0.094078		3.9		0.085332
8.9	0.00996			8.9	0.11114				3.95		0.092728		3.95		0.08172
8.95	0.01141			8.95	0.10854				4		0.090921		4		0.086078
9	0.01056			9	0.10939				4.05		0.092347		4.05		0.082322
9.05	0.01027			9.05	0.11068				4.1		0.088392		4.1		0.083911
9.1	0.01196			9.1	0.11072				4.15		0.088411		4.15		0.082226
9.15	0.01193			9.15	0.11202				4.2		0.085977		4.2		0.080516
9.2	0.01092			9.2	0.10793				4.25		0.089533		4.25		0.080275
9.25	0.00954			9.25	0.11002				4.3		0.089343		4.3		0.077892
9.3	0.00968			9.3	0.10956				4.35		0.090122		4.35		0.075677
9.35	0.01184			9.35	0.10948				4.4		0.08495		4.4		0.077121
9.4	0.00952			9.4	0.1087				4.45		0.089647		4.45		0.074786
9.45	0.00992			9.45	0.10913				4.5		0.086871		4.5		0.078975
9.5	0.00927			9.5	0.11046				4.55		0.085121		4.55		0.070717
9.55	0.00922			9.55	0.11005				4.6		0.084341		4.6		0.073534
9.6	0.00833			9.6	0.10858				4.65		0.083657		4.65		0.067466
9.65	0.00931			9.65	0.10949				4.7		0.083124		4.7		0.065516
9.7	0.00912			9.7	0.10721				4.75		0.085558		4.75		0.069296
9.75	0.00799			9.75	0.10969				4.8		0.083657		4.8		0.066864
9.8	0.00883			9.8	0.11054				4.85		0.08398		4.85		0.063565
9.85	0.0079			9.85	0.11				4.9		0.087004		4.9		0.067731
9.9	0.00766			9.9	0.11112				4.95		0.084018		4.95		0.06867
9.95	0.00847			9.95	0.11231				5		0.083029		5		0.061302
10	0.00821			10	0.11129				5.05		0.082059		5.05		0.06306
10.05	0.00746			10.05	0.10946				5.1		0.081698		5.1		0.066118
10.1	0.00743			10.1	0.11018				5.15		0.080443		5.15		0.063204
10.15	0.00824			10.15	0.11008				5.2		0.080766		5.2		0.060917
10.2	0.00789			10.2	0.10972				5.25		0.081964		5.25		0.059857
10.25	0.0068			10.25	0.11179				5.3		0.077894		5.3		0.061398
10.3	0.00925			10.3	0.11131				5.35		0.080176		5.35		0.061254
10.35	0.00581			10.35	0.10882				5.4		0.078636		5.4		0.059111
10.4	0.00878			10.4	0.11033				5.45		0.082078		5.45		0.059015
10.45	0.00945			10.45	0.11034				5.5		0.078655		5.5		0.060772
10.5	0.00832			10.5	0.10927				5.55		0.076734		5.55		0.058967
10.55	0.00593			10.55	0.11113				5.6		0.078484		5.6		0.057016
10.6	0.00718			10.6	0.10941				5.65		0.078788		5.65		0.054344
10.65	0.00693			10.65	0.10934				5.7		0.076506		5.7		0.053621
10.7	0.0052			10.7	0.10871				5.75		0.073083		5.75		0.057016
10.75	0.00571			10.75	0.1087				5.8		0.078237		5.8		0.058533
10.8	0.00537			10.8	0.1094				5.85		0.073311		5.85		0.057522
10.85	0.0057			10.85	0.10858				5.9		0.073863		5.9		0.054488
10.9	0.00783			10.9	0.1094				5.95		0.072627		5.95		0.052658
10.95	0.00734			10.95	0.10871				6		0.073311		6		0.052682
11	0.00572			11	0.1075				6.05		0.071638		6.05		0.052104
11.05	0.00638			11.05	0.10988				6.1		0.06966		6.1		0.054801
11.1	0.00849			11.1	0.10836				6.15		0.0712		6.15		0.054031
11.15	0.00591			11.15	0.10843				6.2		0.070402		6.2		0.049697
11.2	0.00701			11.2	0.11023				6.25		0.073178		6.25		0.053549
11.25	0.0066			11.25	0.10962				6.3		0.068899		6.3		0.051647
11.3	0.00484			11.3	0.10913				6.35		0.072284		6.35		0.051141
11.35	0.00551			11.35	0.111				6.4		0.070421		6.4		0.052297
11.4	0.00715			11.4	0.1091				6.45		0.069641		6.45		0.050347
11.45	0.00635			11.45	0.11036				6.5		0.068196		6.5		0.047939
11.5	0.00613			11.5	0.10992				6.55		0.069812		6.55		0.048709
11.55	0.00596			11.55	0.10958				6.6		0.06928		6.6		0.047385
11.6	0.00529			11.6	0.11033				6.65		0.068671		6.65		0.042859
11.65	0.0063			11.65	0.10767				6.7		0.067853		6.7		0.045579
11.7	0.00728			11.7	0.10893				6.75		0.069679		6.75		0.043822
11.75	0.00723			11.75	0.10828				6.8		0.072988		6.8		0.04009
11.8	0.0066			11.8	0.10763				6.85		0.066807		6.85		0.043966
11.85	0.00763			11.85	0.11015				6.9		0.070421		6.9		0.043436
11.9	0.00709			11.9	0.10911				6.95		0.072513		6.95		0.045916
11.95	0.00458			11.95	0.10785				7		0.068272		7		0.04216
12	0.00679			12	0.10759				7.05		0.067359		7.05		0.044111
12.05	0.00838			12.05	0.10881				7.1		0.068519		7.1		0.042955
12.1	0.00709			12.1	0.1077				7.15		0.067511		7.15		0.042425
12.15	0.00583			12.15	0.10972				7.2		0.068823		7.2		0.042497
12.2	0.00574			12.2	0.1082				7.25		0.064449		7.25		0.04346
12.25	0.00616			12.25	0.10858				7.3		0.067131		7.3		0.039752
12.3	0.00416			12.3	0.10799				7.35		0.065077		7.35		0.037682
12.35	0.00674			12.35	0.10752				7.4		0.063346		7.4		0.037706
12.4	0.00528			12.4	0.10814				7.45		0.06675		7.45		0.038115
12.45	0.00627			12.45	0.10923				7.5		0.061882		7.5		0.034335
12.5	0.00468			12.5	0.10845				7.55		0.063346		7.55		0.0333
12.55	0.00466			12.55	0.10949				7.6		0.063651		7.6		0.033685
12.6	0.00582			12.6	0.10659				7.65		0.064411		7.65		0.033974
12.65	0.00747			12.65	0.10837				7.7		0.063403		7.7		0.035322
12.7	0.00521			12.7	0.10988				7.75		0.060684		7.75		0.033685
12.75	0.00636			12.75	0.10931				7.8		0.063841		7.8		0.031759
12.8	0.00744			12.8	0.10882				7.85		0.065153		7.85		0.034455
12.85	0.00663			12.85	0.1076				7.9		0.062433		7.9		0.035635
12.9	0.0068			12.9	0.10717				7.95		0.065476		7.95		0.028508
12.95	0.00596			12.95	0.10789				8		0.061692		8		0.03224
13	0.00507			13	0.10879				8.05		0.061996		8.05		0.033131
13.05	0.00651			13.05	0.10855				8.1		0.056747		8.1		0.029881
13.1	0.00575			13.1	0.10988				8.15		0.063213		8.15		0.031999
13.15	0.00352			13.15	0.10992				8.2		0.063498		8.2		0.032385
13.2	0.00455			13.2	0.11046				8.25		0.061349		8.25		0.02427
13.25	0.0055			13.25	0.11041				8.3		0.059581		8.3		0.031157
13.3	0.0049			13.3	0.1096				8.35		0.060874		8.35		0.028677
13.35	0.0046			13.35	0.10921				8.4		0.058972		8.4		0.028966
13.4	0.00547			13.4	0.10975				8.45		0.061121		8.45		0.025498
13.45	0.00637			13.45	0.10891				8.5		0.057223		8.5		0.029856
13.5	0.00418			13.5	0.10988				8.55		0.058059		8.55		0.0261
13.55	0.0031			13.55	0.10998				8.6		0.058174		8.6		0.028484
13.6	0.00603			13.6	0.10772				8.65		0.056253		8.65		0.027954
13.65	0.00387			13.65	0.10888				8.7		0.057812		8.7		0.02663
13.7	0.00396			13.7	0.10986				8.75		0.058744		8.75		0.02793
13.75	0.00599			13.75	0.10877				8.8		0.053647		8.8		0.026341
13.8	0.00588			13.8	0.10846				8.85		0.055739		8.85		0.026943
13.85	0.00382			13.85	0.1091				8.9		0.054865		8.9		0.025474
13.9	0.00428			13.9	0.10756				8.95		0.054998		8.95		0.023644
13.95	0.00326			13.95	0.10862				9		0.054047		9		0.027714
14	0.00327			14	0.10812				9.05		0.054009		9.05		0.022537
14.05	0.00392			14.05	0.10702				9.1		0.052392		9.1		0.028797
14.1	0.00613			14.1	0.1101				9.15		0.057033		9.15		0.028291
14.15	0.00548			14.15	0.10841				9.2		0.05127		9.2		0.029784
14.2	0.00489			14.2	0.10724				9.25		0.058934		9.25		0.023813
14.25	0.00443			14.25	0.10812				9.3		0.053819		9.3		0.023018
14.3	0.00381			14.3	0.10814				9.35		0.053743		9.35		0.02793
14.35	0.00337			14.35	0.1075				9.4		0.055625		9.4		0.028171
14.4	0.00664			14.4	0.1087				9.45		0.054142		9.45		0.023668
14.45	0.00315			14.45	0.10867				9.5		0.054256		9.5		0.023404
14.5	0.0067			14.5	0.10891				9.55		0.057128		9.55		0.019816
14.55	0.00453			14.55	0.10862				9.6		0.055036		9.6		0.02297
14.6	0.00507			14.6	0.10947				9.65		0.055283		9.65		0.025234
14.65	0.00477			14.65	0.10563				9.7		0.052392		9.7		0.024126
14.7	0.00442			14.7	0.10731				9.75		0.052697		9.75		0.025522
14.75	0.00287			14.75	0.10718				9.8		0.052221		9.8		0.020659
14.8	0.00445			14.8	0.10769				9.85		0.04857		9.85		0.025667
14.85	0.00304			14.85	0.10873				9.9		0.053305		9.9		0.017312
14.9	0.00477			14.9	0.10851				9.95		0.05418		9.95		0.017794
14.95	0.00595			14.95	0.10583				10		0.053819		10		0.020948
15	0.0056			15	0.10738				10.05		0.050015		10.05		0.021815
15.05	0.00381			15.05	0.10661				10.1		0.053115		10.1		0.019046
15.1	0.00376			15.1	0.1084				10.15		0.052944		10.15		0.019407
15.15	0.00464			15.15	0.10768				10.2		0.051727		10.2		0.022802
15.2	0.0041			15.2	0.10855				10.25		0.050966		10.25		0.023067
15.25	0.00521			15.25	0.10649				10.3		0.051099		10.3		0.018708
15.3	0.00463			15.3	0.10883				10.35		0.053971		10.35		0.021429
15.35	0.00381			15.35	0.10686				10.4		0.051746		10.4		0.018251
15.4	0.00426			15.4	0.10789				10.45		0.050262		10.45		0.019407
15.45	0.00137			15.45	0.10757				10.5		0.049293		10.5		0.020322
15.5	0.00345			15.5	0.10687				10.55		0.048627		10.55		0.017071
15.55	0.00309			15.55	0.10616				10.6		0.049616		10.6		0.022754
15.6	0.00432			15.6	0.10816				10.65		0.047638		10.65		0.018708
15.65	0.00251			15.65	0.10785				10.7		0.048037		10.7		0.018395
15.7	0.00481			15.7	0.10667				10.75		0.047277		10.75		0.015554
15.75	0.00422			15.75	0.10823				10.8		0.044919		10.8		0.021718
15.8	0.00527			15.8	0.10608				10.85		0.045546		10.85		0.019431
15.85	0.00127			15.85	0.10679				10.9		0.044329		10.9		0.022874
15.9	0.00378			15.9	0.10842				10.95		0.045489		10.95		0.01984
15.95	0.0044			15.95	0.10797				11		0.043568		11		0.015097
16	0.00313			16	0.10676				11.05		0.044633		11.05		0.016445
16.05	0.00317			16.05	0.10486				11.1		0.046174		11.1		0.017095
16.1	0.00481			16.1	0.10499				11.15		0.046117		11.15		0.021815
16.15	0.0038			16.15	0.10813				11.2		0.048323		11.2		0.017794
16.2	0.00373			16.2	0.10721				11.25		0.042522		11.25		0.013676
16.25	0.00357			16.25	0.10598				11.3		0.048437		11.3		0.016806
16.3	0.00242			16.3	0.10881				11.35		0.047182		11.35		0.016156
16.35	0.00313			16.35	0.10692				11.4		0.047391		11.4		0.012833
16.4	0.00311			16.4	0.10669				11.45		0.044957		11.45		0.016445
16.45	0.00381			16.45	0.10674				11.5		0.044709		11.5		0.015145
16.5	0.00586			16.5	0.1075				11.55		0.043949		11.55		0.017432
16.55	0.00223			16.55	0.10783				11.6		0.045242		11.6		0.017625
16.6	0.0034			16.6	0.10643				11.65		0.046972		11.65		0.015049
16.65	0.00344			16.65	0.10678				11.7		0.046554		11.7		0.016854
16.7	0.00316			16.7	0.10754				11.75		0.043492		11.75		0.015193
16.75	0.00207			16.75	0.10745				11.8		0.043226		11.8		0.019383
16.8	0.00593			16.8	0.10595				11.85		0.0445		11.85		0.018275
16.85	0.00505			16.85	0.1061				11.9		0.043702		11.9		0.019166
16.9	0.00412			16.9	0.10597				11.95		0.044139		11.95		0.014182
16.95	0.00461			16.95	0.10474				12		0.041914		12		0.017216
17	0.00409			17	0.1059				12.05		0.042884		12.05		0.016614
17.05	0.0036			17.05	0.10538				12.1		0.044215		12.1		0.014278
17.1	0.00597			17.1	0.10517				12.15		0.042313		12.15		0.017047
17.15	0.00519			17.15	0.10577				12.2		0.043987		12.2		0.015
17.2	0.00307			17.2	0.10767				12.25		0.040868		12.25		0.016854
17.25	0.0034			17.25	0.10588				12.3		0.041534		12.3		0.013604
17.3	0.00585			17.3	0.10546				12.35		0.045546		12.35		0.011846
17.35	0.00509			17.35	0.10677				12.4		0.041515		12.4		0.015482
17.4	0.00515			17.4	0.10625				12.45		0.046022		12.45		0.017432
17.45	0.00502			17.45	0.10589				12.5		0.042503		12.5		0.013652
17.5	0.00482			17.5	0.10453				12.55		0.04393		12.55		0.012954
17.55	0.00307			17.55	0.10711				12.6		0.042637		12.6		0.014808
17.6	0.00412			17.6	0.1055				12.65		0.041686		12.65		0.017095
17.65	0.00465			17.65	0.10726				12.7		0.041819		12.7		0.015386
17.7	0.00515			17.7	0.10621				12.75		0.040469		12.75		0.019359
17.75	0.00331			17.75	0.10708				12.8		0.042199		12.8		0.011678
17.8	0.00432			17.8	0.1058				12.85		0.041039		12.85		0.01801
17.85	0.00388			17.85	0.10699				12.9		0.03986		12.9		0.009655
17.9	0.00581			17.9	0.10694				12.95		0.040088		12.95		0.011678
17.95	0.00393			17.95	0.10546				13		0.042104		13		0.018829
18	0.00369			18	0.10623				13.05		0.040431		13.05		0.012809
18.05	0.0055			18.05	0.10674				13.1		0.04161		13.1		0.011894
18.1	0.00351			18.1	0.10472				13.15		0.038206		13.15		0.014712
18.15	0.00384			18.15	0.10561				13.2		0.039347		13.2		0.012761
18.2	0.00237			18.2	0.10601				13.25		0.041229		13.25		0.013122
18.25	0.00384			18.25	0.10743				13.3		0.039518		13.3		0.018492
18.3	0.0048			18.3	0.10721				13.35		0.042237		13.35		0.014808
18.35	0.0042			18.35	0.10732				13.4		0.039023		13.4		0.013339
18.4	0.00424			18.4	0.10648				13.45		0.042732		13.45		0.014061
18.45	0.00309			18.45	0.10356				13.5		0.039194		13.5		0.014712
18.5	0.00326			18.5	0.1065				13.55		0.038453		13.55		0.00939
18.55	0.00299			18.55	0.10664				13.6		0.038662		13.6		0.012689
18.6	0.00236			18.6	0.10812				13.65		0.034916		13.65		0.017625
18.65	0.00296			18.65	0.10847				13.7		0.036475		13.7		0.013171
18.7	0.00141			18.7	0.1088				13.75		0.0387		13.75		0.011943
18.75	0.00199			18.75	0.10644				13.8		0.037901		13.8		0.01541
18.8	0.0019			18.8	0.10592				13.85		0.035087		13.85		0.012737
18.85	0.00235			18.85	0.10713				13.9		0.034916		13.9		0.008596
18.9	0.00208			18.9	0.10737				13.95		0.035847		13.95		0.015843
18.95	0.00318			18.95	0.10733				14		0.032957		14		0.009318
19	0.00327			19	0.1072				14.05		0.035505		14.05		0.013604
19.05	0.00117			19.05	0.10716				14.1		0.034706		14.1		0.015121
19.1	0.0025			19.1	0.1069				14.15		0.033965		14.15		0.013941
19.15	0.00219			19.15	0.10808				14.2		0.036133		14.2		0.010931
19.2	0.00203			19.2	0.10839				14.25		0.032405		14.25		0.01659
19.25	0.00323			19.25	0.10702				14.3		0.032386		14.3		0.006983
19.3	0.00278			19.3	0.10794				14.35		0.033109		14.35		0.011726
19.35	0.00294			19.35	0.10806				14.4		0.034706		14.4		0.009366
19.4	0.00295			19.4	0.1068				14.45		0.033984		14.45		0.008283
19.45	0.00157			19.45	0.10601				14.5		0.032995		14.5		0.007296
19.5	0.00326			19.5	0.10713				14.55		0.035182		14.55		0.006116
19.55	0.00306			19.55	0.10892				14.6		0.034117		14.6		0.006814
19.6	0.0044			19.6	0.10713				14.65		0.031302		14.65		0.009631
19.65	0.00456			19.65	0.10841				14.7		0.028773		14.7		0.006357
19.7	0.00123			19.7	0.10728				14.75		0.030789		14.75		0.007247
19.75	0.00209			19.75	0.10806				14.8		0.037426		14.8		0.011317
19.8	0.00211			19.8	0.10516				14.85		0.036551		14.85		0.010281
19.85	0.00153			19.85	0.10719				14.9		0.035372		14.9		0.002649
19.9	0.00212			19.9	0.10858				14.95		0.03193		14.95		0.007416
19.95	0.0035			19.95	0.10756				15		0.028792		15		0.008837
20	0.00284			20	0.10771				15.05		0.03309		15.05		0.005995
20.05	0.0018			20.05	0.10647				15.1		0.036798		15.1		0.008042
20.1	0.0038			20.1	0.10631				15.15		0.032044		15.15		0.010835
20.15	0.00143			20.15	0.10753				15.2		0.033984		15.2		0.00939
20.2	0.00227			20.2	0.10716				15.25		0.035163		15.25		0.006477
20.25	0.00098			20.25	0.10535				15.3		0.03366		15.3		0.006188
20.3	0.00196			20.3	0.10673				15.35		0.034117		15.35		0.011991
20.35	0.00325			20.35	0.10461				15.4		0.034573		15.4		0.012593
20.4	0.00124			20.4	0.10853				15.45		0.033147		15.45		0.012039
20.45	0.00341			20.45	0.10625				15.5		0.032614		15.5		0.011028
20.5	0.00209			20.5	0.10479				15.55		0.033242		15.55		0.010955
20.55	0.00353			20.55	0.10578				15.6		0.031664		15.6		0.013917
20.6	0.00255			20.6	0.10647				15.65		0.033356		15.65		0.010715
20.65	0.00257			20.65	0.10731				15.7		0.032805		15.7		0.0098
20.7	0.00145			20.7	0.10769				15.75		0.034725		15.75		0.007247
20.75	0.00257			20.75	0.10621				15.8		0.035981		15.8		0.010859
20.8	0.00025			20.8	0.10694				15.85		0.033679		15.85		0.008572
20.85	0.00168			20.85	0.10686				15.9		0.033794		15.9		0.007898
20.9	0.00405			20.9	0.10779				15.95		0.031664		15.95		0.011004
20.95	0.00333			20.95	0.10736				16		0.03387		16		0.004912
21	0.00034			21	0.10803				16.05		0.03638		16.05		0.008283
21.05	0.0036			21.05	0.1083				16.1		0.034326		16.1		0.007464
21.1	0.00281			21.1	0.10854				16.15		0.029857		16.15		0.010281
21.15	0.00145			21.15	0.10647				16.2		0.035353		16.2		0.007633
21.2	0.00191			21.2	0.10609				16.25		0.03387		16.25		0.00378
21.25	0.00191			21.25	0.10615				16.3		0.032595		16.3		0.007392
21.3	0.00133			21.3	0.10788				16.35		0.034402		16.35		0.006983
21.35	0.0011			21.35	0.10896				16.4		0.033413		16.4		0.008355
21.4	0.00233			21.4	0.10623				16.45		0.029096		16.45		0.011028
21.45	0.00257			21.45	0.10633				16.5		0.029458		16.5		0.004478
21.5	0.00103			21.5	0.10769				16.55		0.032576		16.55		0.005995
21.55	0.00155			21.55	0.10871				16.6		0.029115		16.6		0.010353
21.6	0.00123			21.6	0.10791				16.65		0.032139		16.65		0.007657
21.65	0.00176			21.65	0.1056				16.7		0.030028		16.7		0.007392
21.7	0.00055			21.7	0.10738				16.75		0.030161		16.75		0.009463
21.75	0.00056			21.75	0.10671				16.8		0.027176		16.8		0.005923
21.8	0.00134			21.8	0.10933				16.85		0.029591		16.85		0.010474
21.85	0.00316			21.85	0.10584				16.9		0.030161		16.9		0.008355
21.9	0.00395			21.9	0.10866				16.95		0.02613		16.95		0.008186
21.95	0.00155			21.95	0.10749				17		0.028754		17		0.009703
22	0.00229			22	0.10584				17.05		0.030903		17.05		0.00756
22.05	0.00268			22.05	0.10634				17.1		0.028678		17.1		0.007416
22.1	0.00083			22.1	0.10583				17.15		0.027461		17.15		0.007753
22.15	0.00288			22.15	0.10625				17.2		0.029724		17.2		0.009101
22.2	0.00131			22.2	0.1081				17.25		0.031036		17.25		0.004238
22.25	0.00412			22.25	0.10629				17.3		0.026814		17.3		0.003202
22.3	0.00387			22.3	0.1082				17.35		0.029876		17.35		0.004093
22.35	0.00192			22.35	0.10803				17.4		0.029039		17.4		0.008957
22.4	0.00173			22.4	0.10695				17.45		0.029229		17.45		0.001445
22.45	0.00122			22.45	0.10756				17.5		0.028963		17.5		0.006862
22.5	0.00219			22.5	0.10726				17.55		0.028545		17.55		0.003491
22.55	0.00278			22.55	0.10772				17.6		0.028222		17.6		0.008307
22.6	0.00238			22.6	0.10829				17.65		0.02864		17.65		0.003178
22.65	0.00167			22.65	0.10892				17.7		0.030466		17.7		0.005321
22.7	0.00208			22.7	0.10618				17.75		0.027252		17.75		0.005297
22.75	0.00167			22.75	0.10829				17.8		0.027765		17.8		0.007825
22.8	0.00474			22.8	0.10689				17.85		0.026947		17.85		0.001637
22.85	0.00295			22.85	0.10847				17.9		0.026795		17.9		0.004454
22.9	0.00241			22.9	0.10799				17.95		0.02535		17.95		0.00549
22.95	0.00299			22.95	0.10659				18		0.027879		18		0.003467
23	0.00219			23	0.10908				18.05		0.028906		18.05		0.009053
23.05	0.00434			23.05	0.10708				18.1		0.027879		18.1		0.006405
23.1	0.00328			23.1	0.10629				18.15		0.028849		18.15		0.002336
23.15	0.00127			23.15	0.10627				18.2		0.027765		18.2		0.003588
23.2	0.00143			23.2	0.10719				18.25		0.029077		18.25		0.003491
23.25	0.00252			23.25	0.10765				18.3		0.027195		18.3		0.005947
23.3	0.0022			23.3	0.10519				18.35		0.030066		18.35		0.005731
23.35	0.00261			23.35	0.10589				18.4		0.026909		18.4		0.004816
23.4	0.00409			23.4	0.10741				18.45		0.028621		18.45		0.00679
23.45	0.0012			23.45	0.10587				18.5		0.02748		18.5		0.00366
23.5	0.00442			23.5	0.1083				18.55		0.029857		18.55		0.000626
23.55	0.00414			23.55	0.10615				18.6		0.025369		18.6		0.004406
23.6	0.00146			23.6	0.10897				18.65		0.027252		18.65		0.006116
23.65	0.00297			23.65	0.10749				18.7		0.022554		18.7		0.007512
23.7	0.00099			23.7	0.10925				18.75		0.026396		18.75		0.006068
23.75	0.00279			23.75	0.10734				18.8		0.025673		18.8		0.002986
23.8	0.00345			23.8	0.1072				18.85		0.027004		18.85		0.003323
23.85	0.00207			23.85	0.10703				18.9		0.026548		18.9		0.009077
23.9	0.00311			23.9	0.10793				18.95		0.026054		18.95		0.005466
23.95	0.00314			23.95	0.10663				19		0.027784		19		-7.2e-05
24	0.00217			24	0.10823				19.05		0.026035		19.05		0.008812
24.05	0.0012			24.05	0.10826				19.1		0.028126		19.1		0.008885
24.1	0.00106			24.1	0.10615				19.15		0.027499		19.15		0.005345
24.15	0.00175			24.15	0.1077				19.2		0.026453		19.2		0.007512
24.2	0.00195			24.2	0.1073				19.25		0.026757		19.25		0.00744
24.25	0.00174			24.25	0.10671				19.3		0.025217		19.3		0.003901
24.3	0.0023			24.3	0.10661				19.35		0.025616		19.35		0.001974
24.35	-0.00018			24.35	0.10816				19.4		0.023581		19.4		0.002745
24.4	0.00032			24.4	0.10762				19.45		0.026871		19.45		0.006332
24.45	0.00202			24.45	0.10608				19.5		0.025008		19.5		0.009896
24.5	0.00154			24.5	0.10677				19.55		0.022535		19.55		0.005201
24.55	0.00206			24.55	0.10654				19.6		0.022726		19.6		0.007585
24.6	0.00105			24.6	0.10685				19.65		0.021642		19.65		0.007536
24.65	0.00173			24.65	0.10855				19.7		0.022707		19.7		0.001565
24.7	0.00283			24.7	0.10819				19.75		0.028241		19.75		0.008933
24.75	0.00224			24.75	0.10758				19.8		0.023581		19.8		0.008692
24.8	0.00054			24.8	0.1066				19.85		0.025331		19.85		0.004647
24.85	0.0013			24.85	0.10787				19.9		0.025863		19.9		0.006116
24.9	0.00212			24.9	0.10845				19.95		0.019645		19.95		0.005634
24.95	0.00248			24.95	0.10755				20		0.023372		20		0.002889
25	0.00185			25	0.10794				20.05		0.026928		20.05		0.006068
25.05	0.00263			25.05	0.10755				20.1		0.022726		20.1		0.005249
25.1	-0.00021			25.1	0.10728				20.15		0.022592		20.15		0.007103
25.15	0.00101			25.15	0.10687				20.2		0.022554		20.2		0.005393
25.2	0.00234			25.2	0.10522				20.25		0.023924		20.25		0.002673
25.25	0.00089			25.25	0.10733				20.3		0.018751		20.3		0.003226
25.3	0.00126			25.3	0.10882				20.35		0.021299		20.35		-4.8e-05
25.35	0.00121			25.35	0.10788				20.4		0.02052		20.4		0.010065
25.4	0.00196			25.4	0.10825				20.45		0.018485		20.45		0.008524
25.45	0.00245			25.45	0.10666				20.5		0.020995		20.5		0.000674
25.5	0.00211			25.5	0.10684				20.55		0.018846		20.55		0.004382
25.55	0.00127			25.55	0.10761				20.6		0.022041		20.6		0.003178
25.6	0.00214			25.6	0.1052				20.65		0.022041		20.65		0.00679
25.65	0.00191			25.65	0.10676				20.7		0.015727		20.7		-0.00234
25.7	0.00184			25.7	0.10755				20.75		0.021014		20.75		0.005682
25.75	0.00136			25.75	0.10664				20.8		0.021223		20.8		0.004791
25.8	9e-05			25.8	0.10733				20.85		0.019417		20.85		0.002528
25.85	4e-05			25.85	0.10828				20.9		0.020577		20.9		0.00744
25.9	0.00125			25.9	0.1064				20.95		0.021908		20.95		0.004358
25.95	0.00129			25.95	0.10389				21		0.021128		21		-0.00067
26	0.00064			26	0.10664				21.05		0.023334		21.05		0.002528
26.05	0.001			26.05	0.10689				21.1		0.018352		21.1		0.001517
26.1	0.00037			26.1	0.10626				21.15		0.01818		21.15		0.001613
26.15	0.00239			26.15	0.10932				21.2		0.020976		21.2		0.00443
26.2	0.00329			26.2	0.10668				21.25		0.020177		21.25		-0.00123
26.25	0.00114			26.25	0.10668				21.3		0.019512		21.3		0.000843
26.3	0.00087			26.3	0.10629				21.35		0.016659		21.35		0.000578
26.35	0.00205			26.35	0.10699				21.4		0.018808		21.4		0.003636
26.4	0.00039			26.4	0.10734				21.45		0.01626		21.45		0.004719
26.45	0.00196			26.45	0.10762				21.5		0.021699		21.5		0.007031
26.5	-0.00064			26.5	0.10844				21.55		0.021565		21.55		0.005875
26.55	0.00122			26.55	0.10656				21.6		0.017629		21.6		0.005514
26.6	0.00159			26.6	0.10855				21.65		0.018618		21.65		0.006429
26.65	0.00161			26.65	0.10792				21.7		0.020006		21.7		0.001156
26.7	0.00172			26.7	0.11001				21.75		0.020786		21.75		0.004406
26.75	-0.00056			26.75	0.10786				21.8		0.022668		21.8		0.003419
26.8	0.00261			26.8	0.10821				21.85		0.020862		21.85		0.002336
26.85	0.00157			26.85	0.10819				21.9		0.018656		21.9		0.006477
26.9	0.00228			26.9	0.10751				21.95		0.020558		21.95		0.001854
26.95	0.00258			26.95	0.10901				22		0.019873		22		0.007296
27	0.00205			27	0.11028				22.05		0.018028		22.05		0.00691
27.05	0.00236			27.05	0.10852				22.1		0.021223		22.1		0.003852
27.1	0.00177			27.1	0.10796				22.15		0.020006		22.15		0.002119
27.15	0.00313			27.15	0.10857				22.2		0.019512		22.2		0.00484
27.2	0.00122			27.2	0.10824				22.25		0.019683		22.25		0.003058
27.25	-0.00013			27.25	0.1068				22.3		0.020577		22.3		0.001035
27.3	0.00184			27.3	0.1097				22.35		0.018637		22.35		0.002769
27.35	-0.00011			27.35	0.10852				22.4		0.019512		22.4		0.003756
27.4	0.00122			27.4	0.10899				22.45		0.022041		22.45		0.003058
27.45	0.00066			27.45	0.10924				22.5		0.023791		22.5		0.004912
27.5	0.00059			27.5	0.10596				22.55		0.01993		22.55		0.006188
27.55	0.00033			27.55	0.10887				22.6		0.019436		22.6		0.000265
27.6	0.00029			27.6	0.10723				22.65		0.022155		22.65		0.002408
27.65	0.00098			27.65	0.10843				22.7		0.021546		22.7		0.003251
27.7	0.00134			27.7	0.10818				22.75		0.017933		22.75		0.003708
27.75	0.00176			27.75	0.10913				22.8		0.019873		22.8		0.008235
27.8	0.00074			27.8	0.10845				22.85		0.017629		22.85		0.006164
27.85	0.00164			27.85	0.10608				22.9		0.020615		22.9		0.003395
27.9	0.00032			27.9	0.10805				22.95		0.018066		22.95		0.005008
27.95	0.00197			27.95	0.10928				23		0.016545		23		0.001854
28	0.0005			28	0.10672				23.05		0.015518		23.05		0.000193
28.05	0.00178			28.05	0.10758				23.1		0.015119		23.1		-0.00144
28.1	0.00013			28.1	0.10791				23.15		0.019321		23.15		-0.00116
28.15	0.00072			28.15	0.10829				23.2		0.015081		23.2		0.002191
28.2	0.00068			28.2	0.10774				23.25		0.014852		23.25		0.004575
28.25	-0.00079			28.25	0.107				23.3		0.017895		23.3		0.000554
28.3	0.00224			28.3	0.1067				23.35		0.018161		23.35		-0.00067
28.35	0.00179			28.35	0.10773				23.4		0.017401		23.4		-0.00063
28.4	0.00056			28.4	0.10873				23.45		0.015594		23.45		-0.00014
28.45	0.00279			28.45	0.10864				23.5		0.018104		23.5		-0.00185
28.5	0.00228			28.5	0.10961				23.55		0.018485		23.55		-0.00296
28.55	0.0021			28.55	0.10609				23.6		0.016811		23.6		-0.00209
28.6	-0.00091			28.6	0.10744				23.65		0.017173		23.65		-0.00178
28.65	0.00072			28.65	0.10731				23.7		0.020006		23.7		0.001156
28.7	-0.00034			28.7	0.10915				23.75		0.015993		23.75		0.002408
28.75	0.00127			28.75	0.10864				23.8		0.018199		23.8		0.004069
28.8	0.00079			28.8	0.10841				23.85		0.015328		23.85		0.000674
28.85	0.00142			28.85	0.10896				23.9		0.018123		23.9		0.00012
28.9	0.0001			28.9	0.10847				23.95		0.018675		23.95		0.0026
28.95	0.00329			28.95	0.10638				24		0.017781		24		-0.00084
29	0.00282			29	0.10735				24.05		0.020462		24.05		0.001204
29.05	0.00238			29.05	0.1076				24.1		0.018142		24.1		0.003395
29.1	0.00304			29.1	0.10799				24.15		0.01607		24.15		0.001685
29.15	0.00152			29.15	0.10863				24.2		0.017458		24.2		0.000361
29.2	0.00011			29.2	0.10841				24.25		0.015955		24.25		0.002263
29.25	0.00139			29.25	0.10668				24.3		0.016811		24.3		0.000433
29.3	0.00156			29.3	0.10686				24.35		0.022098		24.35		0.001372
29.35	0.00108			29.35	0.10747				24.4		0.015252		24.4		0.005875
29.4	0.0008			29.4	0.10844				24.45		0.019379		24.45		0.00443
29.45	0.00278			29.45	0.10687				24.5		0.016298		24.5		0.001252
29.5	0.00232			29.5	0.1081				24.55		0.020615		24.55		0.004864
29.55	0.00251			29.55	0.10849				24.6		0.018523		24.6		0.003154
29.6	0.00271			29.6	0.10834				24.65		0.020025		24.65		0.002191
29.65	0.00221			29.65	0.1061				24.7		0.020976		24.7		0.003395
29.7	0.00428			29.7	0.10793				24.75		0.017211		24.75		-0.00029
29.75	0.00294			29.75	0.10595				24.8		0.017781		24.8		0.004503
29.8	0.0036			29.8	0.10625				24.85		0.022783		24.85		0.005321
29.85	0.00413			29.85	0.10831				24.9		0.018409		24.9		0.00195
29.9	0.00146			29.9	0.10923				24.95		0.019264		24.95		0.001661
29.95	0.00183			29.95	0.10888				25		0.016944		25		0.001613
30	0.00124			30	0.10704				25.05		0.020748		25.05		0.003828
30.05	0.00257			30.05	0.10839				25.1		0.016811		25.1		0.005755
30.1	0.00029			30.1	0.10672				25.15		0.018276		25.15		0.001806
30.15	0.00065			30.15	0.10897				25.2		0.018561		25.2		0.003226
30.2	-0.00035			30.2	0.10932				25.25		0.014871		25.25		0.005755
30.25	0.00165			30.25	0.10721				25.3		0.015404		25.3		0.007898
30.3	-0.0004			30.3	0.10821				25.35		0.015974		25.35		0.0013
30.35	0.0013			30.35	0.10706				25.4		0.015537		25.4		0.001758
30.4	0.00077			30.4	0.1084				25.45		0.016203		25.45		0.003539
30.45	0.0015			30.45	0.10675				25.5		0.014928		25.5		0.003684
30.5	0.00152			30.5	0.10792				25.55		0.011524		25.55		0.002287
30.55	0.00121			30.55	0.10788				25.6		0.015024		25.6		0.006116
30.6	-0.00209			30.6	0.10716				25.65		0.018066		25.65		0.004623
30.65	0.00066			30.65	0.10707				25.7		0.010307		25.7		0.004045
30.7	-5e-05			30.7	0.10797				25.75		0.012114		25.75		0.001421
30.75	-0.00058			30.75	0.10671				25.8		0.010878		25.8		0.001059
30.8	0.00198			30.8	0.10585				25.85		0.010821		25.85		0.001734
30.85	-0.00066			30.85	0.10778				25.9		0.013274		25.9		-0.00178
30.9	0.00058			30.9	0.10754				25.95		0.01394		25.95		0.00236
30.95	0.00248			30.95	0.10778				26		0.011886		26		0.000915
31	0.00098			31	0.10831				26.05		0.012095		26.05		0.004984
31.05	-0.00089			31.05	0.10834				26.1		0.013902		26.1		-0.00022
31.1	0.00068			31.1	0.1093				26.15		0.014814		26.15		-0.00248
31.15	-0.00113			31.15	0.10841				26.2		0.012247		26.2		0.00053
31.2	-0.00052			31.2	0.10875				26.25		0.012989		26.25		0.000698
31.25	0.00094			31.25	0.10688				26.3		0.015252		26.3		0.000217
31.3	0.00098			31.3	0.10981				26.35		0.014833		26.35		0.003419
31.35	0.00015			31.35	0.10857				26.4		0.014719		26.4		0.00431
31.4	0.00118			31.4	0.11021				26.45		0.013217		26.45		0.007705
31.45	3e-05			31.45	0.1084				26.5		0.012856		26.5		0.005803
31.5	0.00013			31.5	0.10921				26.55		0.013845		26.55		0.004575
31.55	-6e-05			31.55	0.10805				26.6		0.013864		26.6		0.00171
31.6	0.00193			31.6	0.10836				26.65		0.016564		26.65		0.000674
31.65	0.0001			31.65	0.1089				26.7		0.014586		26.7		0.003901
31.7	9e-05			31.7	0.10747				26.75		0.016127		26.75		0.000674
31.75	0.00115			31.75	0.10843				26.8		0.018732		26.8		0.008981
31.8	-0.00051			31.8	0.10813				26.85		0.013597		26.85		0.003395
31.85	-0.00139			31.85	0.10829				26.9		0.018713		26.9		0.005995
31.9	-0.00044			31.9	0.10786				26.95		0.015537		26.95		-0.0006
31.95	-0.00056			31.95	0.10825				27		0.016012		27		0.002528
32	-0.00033			32	0.10952				27.05		0.017249		27.05		-0.0027
32.05	0.00105			32.05	0.10905				27.1		0.01645		27.1		-0.00197
32.1	-0.00071			32.1	0.11038				27.15		0.015214		27.15		0.00065
32.15	0.00171			32.15	0.10984				27.2		0.016735		27.2		0.002071
32.2	0.00139			32.2	0.10697				27.25		0.013293		27.25		-0.00048
32.25	0.00129			32.25	0.10756				27.3		0.015404		27.3		-0.00144
32.3	-0.0016			32.3	0.1074				27.35		0.012114		27.35		0.001637
32.35	-0.00144			32.35	0.10678				27.4		0.012532		27.4		2.41e-05
32.4	-0.00102			32.4	0.11032				27.45		0.015708		27.45		-0.00164
32.45	0.00018			32.45	0.10881				27.5		0.015594		27.5		0.003154
32.5	-0.00066			32.5	0.10752				27.55		0.013198		27.55		0.001011
32.55	-0.00013			32.55	0.10854				27.6		0.01489		27.6		-0.00255
32.6	0.00045			32.6	0.10984				27.65		0.013959		27.65		0.002263
32.65	-0.00112			32.65	0.10839				27.7		0.016031		27.7		0.002071
32.7	-0.00106			32.7	0.10924				27.75		0.014967		27.75		-0.00214
32.75	-0.00046			32.75	0.10851				27.8		0.014073		27.8		0.004767
32.8	-0.00142			32.8	0.10881				27.85		0.010745		27.85		0.004382
32.85	0.00098			32.85	0.10853				27.9		0.010003		27.9		0.008572
32.9	0.00013			32.9	0.10899				27.95		0.01297		27.95		0.003154
32.95	0.00181			32.95	0.10656				28		0.012665		28		0.000361
33	0.00106			33	0.10847				28.05		0.012323		28.05		0.00691
33.05	0.00017			33.05	0.10748				28.1		0.013027		28.1		0.004527
33.1	0.00048			33.1	0.10627				28.15		0.014092		28.15		0.001613
33.15	0.00011			33.15	0.10879				28.2		0.013787		28.2		0.005562
33.2	0.00068			33.2	0.10746				28.25		0.011049		28.25		-0.00077
33.25	-0.00224			33.25	0.10698				28.3		0.012665		28.3		-0.00491
33.3	0.00013			33.3	0.10628				28.35		0.014529		28.35		-0.00014
33.35	0.00063			33.35	0.109				28.4		0.012437		28.4		0.003732
33.4	0.00041			33.4	0.1092				28.45		0.012684		28.45		0.00012
33.45	0.00173			33.45	0.10692				28.5		0.011924		28.5		0.001637
33.5	-0.00061			33.5	0.10745				28.55		0.013864		28.55		0.00313
33.55	-0.00073			33.55	0.10871				28.6		0.012513		28.6		0.000265
33.6	0.00057			33.6	0.10677				28.65		0.015537		28.65		0.002287
33.65	-0.00036			33.65	0.10774				28.7		0.0116		28.7		0.00248
33.7	0.00155			33.7	0.10766				28.75		0.012266		28.75		-0.00046
33.75	0.00117			33.75	0.10845				28.8		0.009832		28.8		0.000795
33.8	-0.00025			33.8	0.10705				28.85		0.014054		28.85		0.000506
33.85	-0.00233			33.85	0.10823				28.9		0.013521		28.9		0.00484
33.9	-0.00106			33.9	0.10825				28.95		0.015309		28.95		0.005129
33.95	0.00032			33.95	0.1073				29		0.012532		29		0.002889
34	0.00129			34	0.10558				29.05		0.012304		29.05		0.003901
34.05	0.00092			34.05	0.10905				29.1		0.012361		29.1		0.002889
34.1	-0.00186			34.1	0.10754				29.15		0.015366		29.15		0.0013
34.15	0.00076			34.15	0.10949				29.2		0.011677		29.2		0.004767
34.2	1e-05			34.2	0.10706				29.25		0.011239		29.25		-0.00349
34.25	0.00122			34.25	0.10727				29.3		0.015271		29.3		0.001782
34.3	-0.00031			34.3	0.10706				29.35		0.014948		29.35		9.63e-05
34.35	0.00058			34.35	0.1087				29.4		0.013787		29.4		0.0013
34.4	-0.00046			34.4	0.10684				29.45		0.009452		29.45		0.000169
34.45	0.00096			34.45	0.10755				29.5		0.012399		29.5		-0.00342
34.5	0.00207			34.5	0.10836				29.55		0.014244		29.55		0.000169
34.55	0.00025			34.55	0.10824				29.6		0.012742		29.6		-0.00364
34.6	-0.00136			34.6	0.1087				29.65		0.015214		29.65		0.003515
34.65	0.00072			34.65	0.10834				29.7		0.0116		29.7		0.000217
34.7	0			34.7	0.10839				29.75		0.012989		29.75		-0.00024
34.75	-0.00281			34.75	0.10939				29.8		0.012209		29.8		-0.00209
34.8	-0.00093			34.8	0.10908				29.85		0.012475		29.85		-0.00108
34.85	-0.00016			34.85	0.10772				29.9		0.012608		29.9		-0.00091
34.9	-0.00119			34.9	0.10942				29.95		0.014092		29.95		0.003491
34.95	-0.0017			34.95	0.10892				30		0.013369		30		0.00248
35	-0.00034			35	0.11005				30.05		0.013217		30.05		0.002311
35.05	-0.00042			35.05	0.10941				30.1		0.013198		30.1		-0.00152
35.1	-0.00108			35.1	0.10816				30.15		0.012209		30.15		-0.00248
35.15	0.00052			35.15	0.10709				30.2		0.013141		30.2		0.001661
35.2	-0.00112			35.2	0.10971				30.25		0.008406		30.25		0.000457
35.25	0.00089			35.25	0.10737				30.3		0.012589		30.3		0.002552
35.3	-0.00054			35.3	0.11049				30.35		0.011943		30.35		0.001902
35.35	0.00052			35.35	0.10906				30.4		0.010612		30.4		-0.00414
35.4	0.00043			35.4	0.10778				30.45		0.010174		30.45		0.000698
35.45	-1e-05			35.45	0.10807				30.5		0.011715		30.5		0.002191
35.5	0.00026			35.5	0.10674				30.55		0.009509		30.55		0.00065
35.55	-0.00019			35.55	0.10899				30.6		0.009471		30.6		0.005538
35.6	0.00052			35.6	0.10888				30.65		0.012399		30.65		0.001011
35.65	0.00059			35.65	0.10932				30.7		0.005515		30.7		0.001372
35.7	-0.00032			35.7	0.10775				30.75		0.012494		30.75		0.000626
35.75	0.00083			35.75	0.11013				30.8		0.010478		30.8		0.001902
35.8	0.00044			35.8	0.10834				30.85		0.009756		30.85		0.003419
35.85	-0.00092			35.85	0.10944				30.9		0.008253		30.9		0.003082
35.9	0.00112			35.9	0.10831				30.95		0.00715		30.95		-0.00294
35.95	-0.0021			35.95	0.10859				31		0.012228		31		-0.00051
36	0.00025			36	0.10892				31.05		0.011753		31.05		0.002889
36.05	0.00012			36.05	0.10868				31.1		0.010079		31.1		-0.00205
36.1	-0.00027			36.1	0.10862				31.15		0.010612		31.15		0.001228
36.15	-0.00055			36.15	0.10931				31.2		0.006922		31.2		-0.00118
36.2	-0.00154			36.2	0.10958				31.25		0.008843		31.25		-0.00231
36.25	-0.00025			36.25	0.10741				31.3		0.008291		31.3		-0.00099
36.3	0.00016			36.3	0.11012				31.35		0.011182		31.35		-0.00118
36.35	-0.00048			36.35	0.10801				31.4		0.011391		31.4		0.000915
36.4	0.00177			36.4	0.10831				31.45		0.009414		31.45		-0.00325
36.45	0.0001			36.45	0.10802				31.5		0.004317		31.5		-0.00111
36.5	-0.0018			36.5	0.11025				31.55		0.010593		31.55		0.002697
36.55	-0.00191			36.55	0.10906				31.6		0.00715		31.6		-0.00318
36.6	-0.00077			36.6	0.11021				31.65		0.010764		31.65		-0.00188
36.65	-0.00125			36.65	0.10673				31.7		0.009699		31.7		-0.0019
36.7	0.00047			36.7	0.10825				31.75		0.010612		31.75		0.001372
36.75	-0.00052			36.75	0.10967				31.8		0.01084		31.8		0.000457
36.8	-0.00054			36.8	0.10898				31.85		0.008938		31.85		0.002745
36.85	0.00019			36.85	0.11006				31.9		0.009375		31.9		0.002913
36.9	-0.00095			36.9	0.10883				31.95		0.008482		31.95		-0.00132
36.95	0.00039			36.95	0.10892				32		0.010631		32		0.002986
37	-3e-05			37	0.1082				32.05		0.009566		32.05		2.41e-05
37.05	-0.00043			37.05	0.10959				32.1		0.00774		32.1		-0.00193
37.1	-0.00018			37.1	0.10863				32.15		0.012247		32.15		0.000746
37.15	-0.00251			37.15	0.10941				32.2		0.010269		32.2		-0.00166
37.2	0.00026			37.2	0.1097				32.25		0.011201		32.25		-0.00046
37.25	0.00136			37.25	0.10793				32.3		0.00852		32.3		0.002143
37.3	-3e-05			37.3	0.1075				32.35		0.009946		32.35		0.001589
37.35	-7e-05			37.35	0.10962				32.4		0.01316		32.4		0.005129
37.4	0.00033			37.4	0.10904				32.45		0.010726		32.45		0.003154
37.45	0.00067			37.45	0.10903				32.5		0.010402		32.5		0.003612
37.5	0.00024			37.5	0.10741				32.55		0.009318		32.55		0.000385
37.55	-0.00221			37.55	0.10752				32.6		0.011106		32.6		0.003732
37.6	-0.00147			37.6	0.1086				32.65		0.009528		32.65		0.002047
37.65	0.00013			37.65	0.10746				32.7		0.00949		32.7		-0.00188
37.7	-0.00069			37.7	0.10897				32.75		0.008482		32.75		-0.00058
37.75	-0.00104			37.75	0.10912				32.8		0.009033		32.8		-0.00058
37.8	-0.00134			37.8	0.1073				32.85		0.008919		32.85		-0.00229
37.85	-0.00261			37.85	0.10703				32.9		0.008729		32.9		-0.00303
37.9	-0.00047			37.9	0.10935				32.95		0.007854		32.95		0.00118
37.95	-0.00141			37.95	0.10835				33		0.006941		33		0.001421
38	-0.00039			38	0.10922				33.05		0.006124		33.05		-0.00342
38.05	-0.00065			38.05	0.10942				33.1		0.009433		33.1		-0.00339
38.1	-0.00165			38.1	0.10821				33.15		0.01162		33.15		-0.00169
38.15	-0.00122			38.15	0.10964				33.2		0.00696		33.2		0.002889
38.2	-0.00189			38.2	0.10995				33.25		0.004298		33.25		-0.0026
38.25	0.00039			38.25	0.10868				33.3		0.00909		33.3		0.003226
38.3	-0.00054			38.3	0.10832				33.35		0.009299		33.35		0.003539
38.35	-0.0004			38.35	0.10972				33.4		0.011639		33.4		0.003515
38.4	-0.00249			38.4	0.10816				33.45		0.01219		33.45		0.002913
38.45	-0.00148			38.45	0.10862				33.5		0.009756		33.5		0.007825
38.5	-0.00038			38.5	0.11119				33.55		0.008824		33.55		0.001878
38.55	-0.00273			38.55	0.10883				33.6		0.010269		33.6		0.000506
38.6	-0.00154			38.6	0.10872				33.65		0.012114		33.65		0.007922
38.65	-0.00037			38.65	0.10951				33.7		0.009623		33.7		-0.00051
38.7	-0.00132			38.7	0.10808				33.75		0.009109		33.75		0.00431
38.75	-0.00186			38.75	0.10699				33.8		0.006865		33.8		0.004334
38.8	-0.0011			38.8	0.11006				33.85		0.007835		33.85		9.63e-05
38.85	-0.00222			38.85	0.10924				33.9		0.009927		33.9		0.006092
38.9	-0.00181			38.9	0.10817				33.95		0.009375		33.95		0.005514
38.95	0.0014			38.95	0.10887				34		0.008976		34		0.001421
39	-0.00169			39	0.10874				34.05		0.008596		34.05		-0.00077
39.05	-0.00057			39.05	0.10931				34.1		0.009775		34.1		0.001421
39.1	-0.00154			39.1	0.10771				34.15		0.011258		34.15		0.001011
39.15	-0.00011			39.15	0.10824				34.2		0.00561		34.2		-0.00132
39.2	-0.00185			39.2	0.10678				34.25		0.005382		34.25		-0.00448
39.25	-0.00026			39.25	0.10889				34.3		0.004564		34.3		0.00171
39.3	0.00063			39.3	0.11001				34.35		0.009109		34.35		-0.00236
39.35	-0.0002			39.35	0.10766				34.4		0.006466		34.4		-0.00091
39.4	-0.00059			39.4	0.10849				34.45		0.011106		34.45		0.004575
39.45	-3e-05			39.45	0.10846				34.5		0.008158		34.5		0.001902
39.5	-0.00016			39.5	0.10724				34.55		0.008577		34.55		0.001348
39.55	-0.00048			39.55	0.10698				34.6		0.004944		34.6		0.001878
39.6	0.00062			39.6	0.10744				34.65		0.010878		34.65		0.001902
39.65	-0.00017			39.65	0.10854				34.7		0.00833		34.7		0.001204
39.7	-0.0013			39.7	0.10912				34.75		0.011277		34.75		0.00378
39.75	-0.00087			39.75	0.11083				34.8		0.009071		34.8		0.003852
39.8	-0.00054			39.8	0.10897				34.85		0.006352		34.85		0.005562
39.85	-0.00026			39.85	0.10835				34.9		0.009261		34.9		0.004262
39.9	0.00134			39.9	0.10879				34.95		0.011125		34.95		0.002793
39.95	-0.00087			39.95	0.10582				35		0.00561		35		0.002793
40	0.00108			40	0.10798				35.05		0.007493		35.05		0.002817
40.05	-0.00158			40.05	0.10741				35.1		0.009356		35.1		0.001854
40.1	0.00082			40.1	0.10927				35.15		0.009642		35.15		0.006284
40.15	-1e-05			40.15	0.10796				35.2		0.010726		35.2		0.002889
40.2	0.00159			40.2	0.10958				35.25		0.00388		35.25		0.000169
40.25	0.00163			40.25	0.10794				35.3		0.008349		35.3		-0.00063
40.3	-0.00045			40.3	0.10824				35.35		0.004811		35.35		-0.00106
40.35	-0.00068			40.35	0.10895				35.4		0.008843		35.4		0.001204
40.4	0.00062			40.4	0.10834				35.45		0.008748		35.45		-0.00017
40.45	-0.00043			40.45	0.10867				35.5		0.006219		35.5		0.002986
40.5	-0.00045			40.5	0.1091				35.55		0.006238		35.55		0.005418
40.55	0.00045			40.55	0.10913				35.6		0.005705		35.6		0.001108
40.6	0.00082			40.6	0.10815				35.65		0.009261		35.65		0.003178
40.65	0.00063			40.65	0.10876				35.7		0.007873		35.7		0.004503
40.7	0.00182			40.7	0.1097				35.75		0.004336		35.75		-0.00051
40.75	0.00024			40.75	0.11004				35.8		0.008044		35.8		0.003828
40.8	0.00032			40.8	0.10931				35.85		0.006124		35.85		0.001324
40.85	-0.00019			40.85	0.10919				35.9		0.01162		35.9		0.003491
40.9	-0.00026			40.9	0.10728				35.95		0.010631		35.95		0.005177
40.95	-0.00032			40.95	0.11033				36		0.006979		36		-0.00072
41	-0.00179			41	0.10916				36.05		0.007131		36.05		0.005562
41.05	-0.00143			41.05	0.11024				36.1		0.009185		36.1		0.004503
41.1	-0.00174			41.1	0.10982				36.15		0.009014		36.15		-0.00171
41.15	-0.00146			41.15	0.10768				36.2		0.009337		36.2		-0.0013
41.2	0.0001			41.2	0.10894				36.25		0.009718		36.25		-0.00383
41.25	-0.00142			41.25	0.10845				36.3		0.003119		36.3		0.001132
41.3	-0.00052			41.3	0.10907				36.35		0.006238		36.35		0.001661
41.35	0.00101			41.35	0.10815				36.4		0.006979		36.4		0.000843
41.4	-0.00141			41.4	0.10663				36.45		0.005439		36.45		-0.00041
41.45	-0.00022			41.45	0.10763				36.5		0.005838		36.5		0.004647
41.5	-0.00141			41.5	0.10806				36.55		0.00852		36.55		0.004358
41.55	-0.00064			41.55	0.10792				36.6		0.007474		36.6		-9.6e-05
41.6	-0.00187			41.6	0.10756				36.65		0.00388		36.65		0.00053
41.65	-0.00141			41.65	0.10754				36.7		0.006124		36.7		-0.00212
41.7	-0.00199			41.7	0.10801				36.75		0.002853		36.75		-0.00077
41.75	-0.00051			41.75	0.10854				36.8		0.003366		36.8		0.002793
41.8	-0.00195			41.8	0.10766				36.85		0.001959		36.85		0.004334
41.85	-0.00091			41.85	0.10829				36.9		0.004849		36.9		-0.00031
41.9	-0.00068			41.9	0.10759				36.95		0.003518		36.95		-0.00017
41.95	-0.00102			41.95	0.10753				37		0.007854		37		0.001565
42	-0.0011			42	0.10903				37.05		0.004355		37.05		0.000746
42.05	-0.0008			42.05	0.10901				37.1		0.003499		37.1		-0.00142
42.1	-0.00085			42.1	0.10748				37.15		0.003765		37.15		-0.00339
42.15	-0.00229			42.15	0.10802				37.2		0.008501		37.2		0.003949
42.2	-0.00158			42.2	0.10854				37.25		0.002358		37.25		-0.00185
42.25	-0.0015			42.25	0.10846				37.3		0.006143		37.3		0.000337
42.3	-0.00103			42.3	0.107				37.35		0.008463		37.35		-0.00181
42.35	-0.00357			42.35	0.10768				37.4		0.005781		37.4		0.001782
42.4	-0.00021			42.4	0.10693				37.45		0.008082		37.45		0.001132
42.45	-0.00256			42.45	0.10793				37.5		0.006124		37.5		0.003732
42.5	-0.00209			42.5	0.10668				37.55		0.004431		37.55		0.000698
42.55	-0.00181			42.55	0.10636				37.6		0.00426		37.6		0.001276
42.6	-0.0024			42.6	0.10735				37.65		0.002567		37.65		-0.00159
42.65	-0.00147			42.65	0.10796				37.7		0.006276		37.7		0.000433
42.7	-0.00252			42.7	0.10813				37.75		0.002282		37.75		-0.00048
42.75	-0.00137			42.75	0.10617				37.8		0.003404		37.8		0.001252
42.8	-0.00071			42.8	0.10771				37.85		0.003594		37.85		-0.00347
42.85	-0.00147			42.85	0.1082				37.9		0.003176		37.9		0.000722
42.9	-0.00202			42.9	0.10811				37.95		0.003956		37.95		-0.00137
42.95	-0.00053			42.95	0.10723				38		0.008482		38		-0.00315
43	-0.00128			43	0.10747				38.05		0.003366		38.05		-0.0007
43.05	0.00132			43.05	0.10841				38.1		0.004773		38.1		0.001156
43.1	-0.00081			43.1	0.10819				38.15		0.004507		38.15		0.002432
43.15	9e-05			43.15	0.10822				38.2		0.005135		38.2		-0.00238
43.2	0.00027			43.2	0.10785				38.25		0.005097		38.25		-0.00048
43.25	-0.00358			43.25	0.11024				38.3		0.00348		38.3		0.00171
43.3	-0.0002			43.3	0.1083				38.35		0.007569		38.35		0.002528
43.35	-0.00024			43.35	0.10753				38.4		0.005154		38.4		0.001011
43.4	-0.00104			43.4	0.1094				38.45		0.007569		38.45		0.001156
43.45	-0.00176			43.45	0.10856				38.5		0.008843		38.5		-0.00205
43.5	-0.00158			43.5	0.10786				38.55		0.009147		38.55		-9.6e-05
43.55	0.00052			43.55	0.10957				38.6		0.0062		38.6		0.001421
43.6	-0.00025			43.6	0.10825				38.65		0.003937		38.65		-0.00161
43.65	5e-05			43.65	0.10893				38.7		0.004089		38.7		-0.00214
43.7	-0.00226			43.7	0.10758				38.75		0.006409		38.75		-0.00525
43.75	-0.00101			43.75	0.1063				38.8		0.006086		38.8		0.005056
43.8	-0.00173			43.8	0.10888				38.85		0.003157		38.85		0.000963
43.85	-0.00389			43.85	0.10817				38.9		0.004469		38.9		-0.00284
43.9	-0.00082			43.9	0.10827				38.95		0.007246		38.95		0.001035
43.95	-0.00175			43.95	0.10907				39		0.007436		39		0.001372
44	-0.00152			44	0.108				39.05		0.006637		39.05		0.002576
44.05	-0.00086			44.05	0.10992				39.1		0.006371		39.1		0.002769
44.1	-0.00134			44.1	0.11047				39.15		0.003423		39.15		-0.00178
44.15	-0.00225			44.15	0.10814				39.2		0.006713		39.2		0.00077
44.2	-0.00205			44.2	0.1079				39.25		0.004089		39.25		0.000891
44.25	-0.00175			44.25	0.10887				39.3		0.005287		39.3		-0.00101
44.3	-0.00309			44.3	0.10776				39.35		0.005059		39.35		0.000506
44.35	-0.00147			44.35	0.10748				39.4		0.005743		39.4		-0.00296
44.4	-0.00349			44.4	0.10915				39.45		0.006884		39.45		0.001421
44.45	-0.00239			44.45	0.11013				39.5		0.006333		39.5		0.001517
44.5	-0.00185			44.5	0.10934				39.55		0.006143		39.55		-0.00354
44.55	-0.00236			44.55	0.10946				39.6		0.007398		39.6		-0.00248
44.6	-0.00229			44.6	0.10852				39.65		0.002948		39.65		-0.00029
44.65	-0.00287			44.65	0.10839				39.7		0.005211		39.7		0.003419
44.7	-0.00014			44.7	0.10843				39.75		0.003499		39.75		0.002576
44.75	-0.00014			44.75	0.10851				39.8		0.004013		39.8		0.00443
44.8	-0.00152			44.8	0.10901				39.85		0.005363		39.85		-0.00455
44.85	-0.00046			44.85	0.10825				39.9		0.00696		39.9		-0.00607
44.9	-0.00038			44.9	0.10923				39.95		0.004849		39.95		-0.00282
44.95	-0.00191			44.95	0.10763				40		0.004621		40		0.002697
45	-0.00078			45	0.10742				40.05		0.005857		40.05		-0.00034
45.05	0.0008			45.05	0.10824				40.1		0.002757		40.1		0.001108
45.1	-0.00156			45.1	0.10875				40.15		0.003271		40.15		-0.00149
45.15	0.0012			45.15	0.10628				40.2		0.003746		40.2		0.00118
45.2	4e-05			45.2	0.10937				40.25		0.005762		40.25		0.003251
45.25	-0.00072			45.25	0.10962				40.3		0.006447		40.3		-0.006
45.3	0.00013			45.3	0.11016				40.35		0.004013		40.35		-0.00224
45.35	-0.00101			45.35	0.10686				40.4		0.008006		40.4		0.000963
45.4	-0.00091			45.4	0.10898				40.45		0.006105		40.45		0.00171
45.45	-0.00101			45.45	0.10958				40.5		0.003347		40.5		0.001661
45.5	0.00075			45.5	0.10865				40.55		0.004488		40.55		0.000433
45.55	0.00018			45.55	0.1085				40.6		0.000361		40.6		-0.00065
45.6	0.0004			45.6	0.10802				40.65		0.003727		40.65		-0.00159
45.65	-0.00111			45.65	0.11073				40.7		0.007626		40.7		-0.0038
45.7	0.00027			45.7	0.10894				40.75		0.00561		40.75		-0.00339
45.75	0.00011			45.75	0.10717				40.8		0.0027		40.8		-0.00378
45.8	-0.0002			45.8	0.10917				40.85		0.005002		40.85		-0.00236
45.85	-0.00019			45.85	0.10943				40.9		0.005287		40.9		-0.00522
45.9	-0.00099			45.9	0.11089				40.95		0.006789		40.95		-0.00313
45.95	-0.00083			45.95	0.10783				41		0.004621		41		-0.00479
46	-0.00036			46	0.10878				41.05		0.006009		41.05		-0.00409
46.05	-0.00067			46.05	0.10813				41.1		0.001502		41.1		-0.00554
46.1	0.00027			46.1	0.10662				41.15		0.000951		41.15		-0.00258
46.15	0.00016			46.15	0.10846				41.2		0.004146		41.2		-0.0012
46.2	-0.00179			46.2	0.10694				41.25		0.006808		41.25		-0.00241
46.25	-0.00013			46.25	0.10813				41.3		0.005534		41.3		-0.00043
46.3	6e-05			46.3	0.11013				41.35		0.007398		41.35		-0.00513
46.35	0.00045			46.35	0.1083				41.4		0.002586		41.4		-0.00031
46.4	0.00179			46.4	0.10861				41.45		0.003138		41.45		-0.00414
46.45	0.00022			46.45	0.11009				41.5		0.005477		41.5		-0.00077
46.5	-0.00115			46.5	0.10854				41.55		0.002548		41.55		0.001397
46.55	-0.00026			46.55	0.10673				41.6		0.003613		41.6		0.003612
46.6	-0.00108			46.6	0.10664				41.65		0.004165		41.65		-0.00421
46.65	-0.00035			46.65	0.10638				41.7		0.004925		41.7		0.001469
46.7	-0.00187			46.7	0.10927				41.75		0.002377		41.75		0.001589
46.75	-0.00073			46.75	0.1075				41.8		0.002434		41.8		0.007416
46.8	-0.00138			46.8	0.10834				41.85		0.004583		41.85		0.004045
46.85	-0.00143			46.85	0.1087				41.9		0.003119		41.9		0.004527
46.9	-0.00068			46.9	0.10868				41.95		0.003899		41.95		0.003082
46.95	-0.002			46.95	0.11016				42		0.003594		42		-0.00106
47	-0.00062			47	0.10743				42.05		0.003708		42.05		-0.00089
47.05	-0.0025			47.05	0.10747				42.1		0.005572		42.1		0.001204
47.1	-0.00281			47.1	0.10875				42.15		0.005724		42.15		-0.00371
47.15	-0.00081			47.15	0.10829				42.2		0.006789		42.2		0.003275
47.2	-0.00094			47.2	0.1079				42.25		0.005952		42.25		0.00301
47.25	-0.0026			47.25	0.10677				42.3		0.003404		42.3		-0.00031
47.3	-0.00079			47.3	0.10911				42.35		0.004754		42.35		0.000602
47.35	-0.00075			47.35	0.10836				42.4		0.005211		42.4		-0.00296
47.4	0.00172			47.4	0.10872				42.45		0.002491		42.45		0.002239
47.45	-1e-05			47.45	0.10876				42.5		0.00329		42.5		0.003178
47.5	-0.0013			47.5	0.10825				42.55		0.004583		42.55		-0.00171
47.55	-0.0028			47.55	0.10983				42.6		0.005097		42.6		0.002697
47.6	-0.00295			47.6	0.10971				42.65		0.006618		42.65		0.002432
47.65	-0.00051			47.65	0.10904				42.7		0.003689		42.7		0.002167
47.7	-0.0014			47.7	0.10898				42.75		0.00464		42.75		-0.00147
47.75	-0.00143			47.75	0.10896				42.8		0.005363		42.8		0.000843
47.8	-0.00072			47.8	0.10986				42.85		0.001483		42.85		0.000963
47.85	-0.00029			47.85	0.10846				42.9		0.000951		42.9		-2.4e-05
47.9	-0.00273			47.9	0.10972				42.95		0.002206		42.95		0.003106
47.95	-0.0004			47.95	0.10887				43		0.004355		43		0.003347
48	-0.00335			48	0.10853				43.05		0.003499		43.05		-0.00248
48.05	-0.00237			48.05	0.10851				43.1		0.003442		43.1		-0.00173
48.1	-0.00117			48.1	0.1082				43.15		0.001103		43.15		0.000674
48.15	-0.00134			48.15	0.10915				43.2		0.003024		43.2		-0.00178
48.2	-0.00046			48.2	0.10955				43.25		0.001445		43.25		0.002937
48.25	-0.00021			48.25	0.10894				43.3		0.003784		43.3		-0.00039
48.3	-0.00113			48.3	0.10938				43.35		0.004564		43.35		-0.00262
48.35	-0.00037			48.35	0.10649				43.4		0.004488		43.4		0.00183
48.4	-0.00062			48.4	0.10935				43.45		0.004545		43.45		-0.0039
48.45	-0.00094			48.45	0.10867				43.5		0.003043		43.5		0.000506
48.5	-0.00095			48.5	0.10834				43.55		0.003784		43.55		0.001156
48.55	-0.00158			48.55	0.1072				43.6		0.001103		43.6		0.001397
48.6	-0.00158			48.6	0.10748				43.65		0.00213		43.65		-7.2e-05
48.65	-0.00163			48.65	0.10932				43.7		0.003176		43.7		0.00301
48.7	-0.00123			48.7	0.10962				43.75		0.002796		43.75		-0.00205
48.75	-0.0011			48.75	0.10884				43.8		0.002815		43.8		-0.00339
48.8	-0.00115			48.8	0.10866				43.85		0.002662		43.85		0.001348
48.85	0.00029			48.85	0.10905				43.9		-1.9e-05		43.9		-0.00323
48.9	-0.00083			48.9	0.10929				43.95		0.00329		43.95		0.001493
48.95	-0.00268			48.95	0.10618				44		0.00194		44		0.001734
49	-0.00154			49	0.1091				44.05		0.002719		44.05		-0.00265
49.05	-0.0019			49.05	0.10633				44.1		0.004222		44.1		0.000578
49.1	-0.00038			49.1	0.10921				44.15		0.002263		44.15		0.002384
49.15	-0.00043			49.15	0.10815				44.2		0.003005		44.2		-0.00183
49.2	0.00011			49.2	0.10668				44.25		0.004564		44.25		-0.00128
49.25	-0.00096			49.25	0.10673				44.3		0.003157		44.3		-0.00164
49.3	-0.0013			49.3	0.10752				44.35		-0.00067		44.35		-0.00419
49.35	-0.0015			49.35	0.10585				44.4		0.002662		44.4		-0.00101
49.4	-0.00017			49.4	0.10764				44.45		0.003822		44.45		0.003708
49.45	-0.00182			49.45	0.1088				44.5		0.001483		44.5		0.001902
49.5	-0.00092			49.5	0.10767				44.55		0.002453		44.55		0.0026
49.55	-0.00095			49.55	0.10833				44.6		0.002453		44.6		0.00053
49.6	-0.00261			49.6	0.10751				44.65		-0.00015		44.65		0.00053
49.65	-0.0019			49.65	0.10765				44.7		0.001674		44.7		0.002649
49.7	0.00049			49.7	0.10813				44.75		0.002149		44.75		0.001108
49.75	-0.00183			49.75	0.10862				44.8		0.001198		44.8		-0.00265
49.8	0.00054			49.8	0.10808				44.85		0.001616		44.85		0.004454
49.85	-0.00174			49.85	0.10768				44.9		0.000513		44.9		0.000193
49.9	-0.00025			49.9	0.10731				44.95		0.001464		44.95		-0.00019
49.95	-0.00272			49.95	0.10863				45		0.002339		45		0.002962
50	0			50	0.10934				45.05		0.001331		45.05		-0.00099
0.001				0.001		0.152626			45.1		0.002244		45.1		-0.00089
0.001115				0.001115		0.155752			45.15		-0.00027		45.15		0.001878
0.001244				0.001244		0.155172			45.2		0.00116		45.2		0.000795
0.001388				0.001388		0.155151			45.25		0.002643		45.25		0.001517
0.001548				0.001548		0.154963			45.3		0.002719		45.3		0.005538
0.001727				0.001727		0.155865			45.35		0.002757		45.35		0.003708
0.001927				0.001927		0.155791			45.4		0.004545		45.4		0.000963
0.002149				0.002149		0.155219			45.45		0.004393		45.45		-0.0006
0.002397				0.002397		0.15516			45.5		0.002529		45.5		0.005321
0.002674				0.002674		0.154026			45.55		0.003518		45.55		0.00077
0.002983				0.002983		0.154764			45.6		0.001883		45.6		0.005755
0.003327				0.003327		0.154119			45.65		0.000513		45.65		-0.00022
0.003712				0.003712		0.155494			45.7		-0.00196		45.7		-0.00289
0.00414				0.00414		0.155058			45.75		0.00213		45.75		0.005129
0.004619				0.004619		0.153057			45.8		0.003632		45.8		0.000915
0.005152				0.005152		0.154185			45.85		0.001864		45.85		0.003106
0.005747				0.005747		0.154109			45.9		0.003784		45.9		0.001998
0.006411				0.006411		0.156527			45.95		-0.00042		45.95		0.000144
[truncated: 82 more rows]
