# Supplementary material for: Dilated cardiomyopathy mutation E525K in human beta-cardiac myosin stabilizes the interacting-heads motif and super-relaxed state of myosin
Source: eLife journal article supplement (doi:10.7554/elife.77415), 2022-11-08
Supplement: fig5-data1 [file Figure 5-source data 1.xlsx]

## Sheet: FRET Summary Panel 5A
	E525K 1	E525K 1	E525K 1	E525K 2	E525K 2	E525K 2	E525K 3	E525K 3	E525K 3	WT 1	WT 1	WT 1	WT 2	WT 2	WT 2	WT 3	WT 3	WT 3
20	0.056723	0.055798	0.054202	0.06073	0.069412	0.069284	0.046238	0.055301	0.05253	0.046403	0.062425	0.064193	0.049263	0.059077	0.05202	0.048663	0.05245	0.052203
50	0.055238	0.05346	0.055873	0.043012	0.043189	0.045144	0.051551	0.05327	0.061632	0.047619	0.046508	0.050835	0.045194	0.04345	0.054597	0.049772	0.046821	0.044166
75	0.051499	0.047302	0.05523	0.051829	0.052852	0.050568	0.060719	0.050102	0.071235	0.034994	0.033745	0.036407	0.031428	0.028675	0.037545	0.046504	0.039075	0.045703
100	0.050421	0.047087	0.050032	0.045806	0.050896	0.055612	0.047125	0.049166	0.048418	0.026242	0.027011	0.026476	0.025348	0.022267	0.026164	0.029772	0.029072	0.027916
150	0.042058	0.045177	0.040354	0.041717	0.042094	0.04455	0.043804	0.042364	0.050318	0.017309	0.015587	0.014548	0.017964	0.014823	0.013764	0.018637	0.018328	0.018911
			Avg #1			Avg #2			Avg #3			Avg #1			Avg #2			Avg #3
	E525K 1	E525K 1	E525K 1	E525K 2	E525K 2	E525K 2	E525K 3	E525K 3	E525K 3	WT 1	WT 1	WT 1	WT 2	WT 2	WT 2	WT 3	WT 3	WT 3
20			0.0555743			0.0664753			0.0513563			0.0576737			0.0534533			0.0511053
50			0.054857			0.0437817			0.0554843			0.0483207			0.047747			0.0469197
75			0.0513437			0.0517497			0.0606853			0.0350487			0.0325493			0.0437607
100			0.04918			0.0507713			0.0482363			0.0265763			0.024593			0.02892
150			0.0425297			0.042787			0.0454953			0.0158147			0.015517			0.0186253
					n=3
WT	Avg	Stdev			P value				Distance	High	Low	Average E
20	0.0540774	0.00332835			0.4982				101.5	100.5	102.5	1
50	0.0476624	0.000704317			0.3865				103.7	103.3	104	0.35
75	0.0371196	0.00588557			0.0187				108.5	105.7	111.8	3.05
100	0.0266964	0.002166			<0.0001				114.5	113.1	116	1.45
150	0.0166523	0.00171514			<0.0001				123.9	121.6	126.5	2.45
E525K	Avg	Stdev							Distance	High	Low	Average E
20	0.057802	0.00780179							100.3	98	102.9	2.45
50	0.0513743	0.00658292							102.6	100.3	105.2	2.45
75	0.0545929	0.00528012							101.2	99.7	102.9	1.6
100	0.0493959	0.00128122							103.3	102.9	103.7	0.4
150	0.043604	0.00164299							105.2	104.4	106.1	0.85

## Sheet: Simulation Panel 5B
FRET Data
WT	Avg	Stdev
20	0.0540774	0.00332835
50	0.0476624	0.000704317
75	0.0371196	0.00588557
100	0.0266964	0.002166
150	0.0166523	0.00171514
E525K	Avg	Stdev
20	0.057802	0.00780179
50	0.0513743	0.00658292
75	0.0545929	0.00528012
100	0.0493959	0.00128122
150	0.043604	0.00164299
Simulation Based on Single Turnover
WT	Avg	Stdev
20	0.053447	0.000506
50	0.034468	0.003094
75	0.024367	0.004538
100	0.009165	0.001957
150	0.007819	0.001003
E525K	Avg	Stdev
20	0.057027	0.00041
50	0.056539	0.000444
75	0.055103	0.000936
100	0.053764	0.001408
150	0.047649	0.001948

## Sheet: Raw Lifetime Data
	Repeat 1	Wild-Type (Donor)			Wild-Type (Donor + Acceptor			E525K (Donor)			E525K (Donor + Acceptor)			Repeat 2	Wild-Type (Donor)			Wild-Type (Donor + Acceptor			E525K (Donor)			E525K (Donor + Acceptor)			Repeat 3	Wild-Type (Donor)			Wild-Type (Donor + Acceptor			E525K (Donor)			E525K (Donor + Acceptor)
Channel	Prompt	Decay	Fit	Residuals	Decay	Fit	Residuals	Decay	Fit	Residuals	Decay	Fit	Residuals	Prompt	Decay	Fit	Residuals	Decay	Fit	Residuals	Decay	Fit	Residuals	Decay	Fit	Residuals	Prompt	Decay	Fit	Residuals	Decay	Fit	Residuals	Decay	Fit	Residuals	Decay	Fit	Residuals
750	0	3	3.97046	-0.560296	7	5.37429	0.614459	10	5.13046	1.53988	10	5.07425	1.55766	0	5	4.02259	0.437111	9	7.44347	0.518845	5	6.23294	-0.551387	7	6.86546	0.0508501	0	14	5.13546	2.36915	10	9.50713	0.15586	8	6.35753	0.580702	10	8.24523	0.554908
751	0	8	3.97046	1.42466	5	5.37429	-0.167389	9	5.13046	1.28985	9	5.07425	1.30858	1	7	4.02259	1.12536	7	7.44347	-0.167614	4	6.23294	-1.11647	6	6.86546	-0.353324	1	7	5.13546	0.70473	7	9.50713	-0.947606	10	6.35753	1.15185	12	8.24523	1.08391
752	0	5	3.97046	0.460424	10	5.37429	1.46278	9	5.13046	1.28985	11	5.07425	1.78668	0	7	4.02259	1.12536	11	7.44347	1.07234	10	6.23294	1.19125	6	6.86546	-0.353324	0	6	5.13546	0.352947	14	9.50713	1.20077	9	6.35753	0.880824	15	8.24523	1.74408
753	0	4	3.97046	0.0147692	9	5.37429	1.20857	5	5.13046	-0.0583421	7	5.07425	0.727866	0	5	4.02259	0.437111	7	7.44347	-0.167614	7	6.23294	0.289922	4	6.86546	-1.43273	0	7	5.13546	0.70473	10	9.50713	0.15586	9	6.35753	0.880824	8	8.24523	-0.0867008
754	0	4	3.97046	0.0147692	10	5.37429	1.46278	10	5.13046	1.53988	7	5.07425	0.727866	0	7	4.02259	1.12536	10	7.44347	0.808447	11	6.23294	1.43732	13	6.86546	1.70141	0	6	5.13546	0.352947	11	9.50713	0.450118	10	6.35753	1.15185	13	8.24523	1.31874
755	0	9	3.97046	1.67651	6	5.37429	0.255443	6	5.13046	0.35499	8	5.07425	1.03441	0	6	4.02259	0.807274	5	7.44347	-1.09275	11	6.23294	1.43732	14	6.86546	1.90678	1	8	5.13546	1.01277	8	9.50713	-0.53285	8	6.35753	0.580702	10	8.24523	0.554908
756	0	9	3.97046	1.67651	10	5.37429	1.46278	8	5.13046	1.01454	9	5.07425	1.30858	0	7	4.06221	1.11038	6	7.49695	-0.611128	10	6.27922	1.17661	12	6.9182	1.46699	1	9	5.13546	1.28818	15	9.50713	1.41825	9	6.35753	0.880824	4	8.24523	-2.12261
757	0	9	3.97046	1.67651	5	5.37429	-0.167389	12	5.13046	1.98307	7	5.07425	0.727866	0	7	4.11065	1.09207	4	7.53186	-1.76593	9	6.32139	0.892871	12	6.95435	1.45655	0	12	5.17559	1.97004	11	9.57148	0.430716	10	6.3994	1.13861	13	8.30539	1.30205
758	0	4	3.97046	0.0147692	4	5.37429	-0.687147	5	5.13046	-0.0583421	3	5.07425	-1.19757	2	8	4.1097	1.37543	4	7.53086	-1.76543	5	6.32043	-0.590514	12	6.95334	1.45685	0	6	5.22626	0.315877	11	9.59825	0.422642	5	6.44896	-0.647995	7	8.33625	-0.505055
759	0	4	3.97046	0.0147692	9	5.37429	1.20857	4	5.13046	-0.565229	8	5.07425	1.03441	1	9	4.10876	1.63041	9	7.52986	0.490046	11	6.31949	1.41123	9	6.95233	0.682556	1	5	5.2253	-0.100756	10	9.59723	0.127366	9	6.44799	0.85067	8	8.33521	-0.118514
760	0	4	3.97046	0.0147692	4	5.37429	-0.687147	7	5.13046	0.706621	10	5.07425	1.55766	0	3	4.10783	-0.639608	12	7.52888	1.2907	5	6.31855	-0.589673	7	6.95134	0.018392	2	4	5.22434	-0.612172	10	9.59623	0.127685	12	6.44703	1.60301	8	8.33418	-0.118149
761	0	3	3.97046	-0.560296	6	5.37429	0.255443	6	5.13046	0.35499	11	5.07425	1.78668	0	2	4.10691	-1.48981	7	7.52791	-0.19953	5	6.31762	-0.58926	8	6.95036	0.371104	1	7	5.26353	0.656323	15	9.65958	1.37889	5	6.48796	-0.665434	10	8.39332	0.508078
762	0	4	3.97046	0.0147692	10	5.37429	1.46278	8	5.13046	1.01454	8	5.07425	1.03441	0	8	4.10601	1.37674	9	7.52695	0.491018	7	6.31671	0.258259	10	6.94939	0.964688	0	4	5.3534	-0.6767	10	9.74972	0.0791465	4	6.57845	-1.28922	7	8.48333	-0.560647
763	0	6	3.97046	0.828556	8	5.37429	0.928327	6	5.13046	0.35499	5	5.07425	-0.0332049	1	7	4.20812	1.05523	9	7.66506	0.444981	13	6.43615	1.82049	8	7.08554	0.323312	1	3	5.40218	-1.3869	15	9.7745	1.34922	5	6.62611	-0.727217	9	8.51216	0.162614
764	0	6	3.97046	0.828556	9	5.37429	1.20857	12	5.13046	1.98307	5	5.07425	-0.0332049	1	6	4.37281	0.664299	13	7.80838	1.4399	10	6.59116	1.07797	12	7.23133	1.3766	0	7	5.39935	0.60499	8	9.77151	-0.626322	4	6.62326	-1.31163	16	8.5091	1.87272
765	0	7	3.97046	1.14506	7	5.37429	0.614459	11	5.13046	1.76973	2	5.07425	-2.17382	1	6	4.4179	0.64589	10	7.83975	0.683131	6	6.62995	-0.257177	3	7.26391	-2.46177	1	6	5.43668	0.229976	10	9.83289	0.0528435	5	6.66231	-0.743408	16	8.56624	1.85844
766	0	9	3.97046	1.67651	5	5.37429	-0.167389	13	5.13046	2.18262	2	5.07425	-2.17382	3	6	4.41364	0.647631	11	7.83524	0.954211	9	6.62566	0.791446	9	7.25936	0.580215	0	4	5.58645	-0.793224	10	10.0201	-0.00635365	11	6.81538	1.26171	13	8.74683	1.17962
767	0	10	3.97046	1.90671	15	5.37429	2.48535	7	5.13046	0.706621	4	5.07425	-0.537124	0	6	4.40942	0.649352	13	7.83078	1.43368	14	6.62142	1.97201	2	7.25486	-3.71575	0	9	5.7515	1.08283	8	10.1485	-0.759611	9	6.97932	0.673558	13	8.88134	1.14231
768	0	7	3.97046	1.14506	6	5.37429	0.255443	5	5.13046	-0.0583421	6	5.07425	0.377937	0	6	4.44487	0.634879	16	7.87986	2.03003	5	6.66351	-0.743945	10	7.30315	0.85282	1	4	5.79605	-0.898024	20	10.1688	2.19832	6	7.02273	-0.417527	6	8.90561	-1.18621
769	0	8	3.97046	1.42466	9	5.37429	1.20857	8	5.13046	1.01454	15	5.07425	2.56282	1	3	4.52881	-0.882658	12	7.9639	1.16512	5	6.74781	-0.781645	12	7.38764	1.33147	1	6	5.82916	0.0697441	9	10.2258	-0.408588	5	7.05755	-0.920162	13	8.95821	1.12099
770	0	8	3.97046	1.42466	8	5.37429	0.928327	11	5.13046	1.76973	8	5.07425	1.03441	1	6	4.61184	0.566712	10	8.04699	0.617596	10	6.8312	1.00206	11	7.47117	1.06398	0	8	5.87289	0.752047	14	10.2452	1.00351	7	7.10012	-0.0378415	14	8.9816	1.34122
771	1	3	3.97046	-0.560296	2	5.37429	-2.38599	10	5.13046	1.53988	16	5.07425	2.73144	0	5	4.82077	0.0801525	8	8.30028	-0.106166	9	7.0618	0.646068	6	7.7225	-0.703206	0	14	5.90519	2.16343	8	10.3013	-0.813636	16	7.13412	2.21647	9	9.03334	-0.0111129
772	0	9	3.97046	1.67651	11	5.37429	1.69621	9	5.13046	1.28985	1	5.07425	-4.07425	0	6	5.01742	0.401136	13	8.43973	1.26479	6	7.23203	-0.502975	10	7.8671	0.674484	0	5	5.94811	-0.424008	13	10.3199	0.74332	11	7.17588	1.15302	5	9.05587	-1.81384
773	1	7	3.97046	1.14506	4	5.37429	-0.687147	11	5.13046	1.76973	8	5.07425	1.03441	0	3	5.00669	-1.15857	5	8.4284	-1.53323	7	7.22124	-0.0836223	5	7.85566	-1.27709	0	7	5.93948	0.400839	17	10.3108	1.62236	10	7.1672	0.89581	9	9.0466	-0.0155341
774	0	9	3.97046	1.67651	7	5.37429	0.614459	11	5.13046	1.76973	4	5.07425	-0.537124	0	8	5.03571	1.04804	10	8.47068	0.483614	10	7.25686	0.867458	13	7.8971	1.41529	0	12	5.97107	1.7404	10	10.3662	-0.115799	5	7.20049	-0.984088	11	9.0976	0.573595
775	0	7	4.01592	1.12788	2	5.46533	-2.45036	7	5.22405	0.671248	5	5.17342	-0.0775568	0	9	5.11328	1.29557	6	8.54801	-1.04022	14	7.33475	1.78136	5	7.97482	-1.33038	0	6	6.05343	-0.0218122	8	10.4484	-0.86565	11	7.28343	1.12059	11	9.17957	0.548881
776	0	4	4.09219	-0.0460961	11	5.49514	1.65978	7	5.25392	0.659957	5	5.19742	-0.0882898	0	8	5.15039	1.00749	10	8.57097	0.451899	10	7.36552	0.833094	10	7.99892	0.632797	0	14	6.09478	2.11276	11	10.4654	0.161187	4	7.32361	-1.6618	12	9.20044	0.808164
777	0	10	4.13633	1.85426	5	5.58478	-0.261521	10	5.34615	1.47168	5	5.29515	-0.131997	0	7	5.13824	0.70368	13	8.55815	1.23195	8	7.3533	0.228642	12	7.98599	1.15874	1	11	6.08459	1.48205	19	10.4547	1.96043	10	7.31336	0.849589	9	9.18952	-0.0631733
778	0	10	4.21129	1.83055	5	5.61321	-0.274235	4	5.37469	-0.687344	8	5.31773	0.948326	0	3	5.12622	-1.22757	12	8.54548	0.997233	8	7.34122	0.232916	7	7.97322	-0.367841	0	4	6.07451	-1.03726	16	10.4441	1.38898	5	7.30323	-1.03004	13	9.17873	1.05983
779	0	9	4.20868	1.59711	9	5.61045	1.12985	12	5.37201	1.91334	7	5.31488	0.636916	0	2	5.11433	-2.20216	11	8.53296	0.74384	6	7.32926	-0.542668	8	7.96059	0.0139339	1	2	6.06454	-2.87407	12	10.4336	0.452174	10	7.2932	0.855965	10	9.16807	0.26308
780	0	4	4.20609	-0.103045	7	5.60772	0.526232	7	5.36936	0.616323	5	5.31206	-0.139559	0	10	5.10257	1.5487	8	8.52059	-0.184055	7	7.31744	-0.11998	8	7.94811	0.0183462	0	6	6.05468	-0.022323	12	10.4233	0.455163	10	7.28328	0.859102	14	9.15753	1.29421
781	0	9	4.20353	1.59882	3	5.60503	-1.50401	6	5.36675	0.258524	8	5.30928	0.951313	0	7	5.09094	0.721557	5	8.50835	-1.56898	10	7.30574	0.851998	4	7.93578	-1.96789	0	5	6.04492	-0.467303	10	10.413	-0.130613	8	7.27347	0.256867	12	9.14712	0.823557
782	0	2	4.201	-1.55634	3	5.60236	-1.50248	11	5.36416	1.69927	2	5.30653	-2.33807	0	6	5.07944	0.375818	6	8.49626	-1.0191	6	7.29418	-0.528347	7	7.92359	-0.349083	0	3	6.03527	-1.75241	15	10.4029	1.18696	9	7.26376	0.578746	10	9.13682	0.27296
783	0	6	4.1985	0.735459	11	5.59973	1.62824	10	5.3616	1.46679	3	5.30382	-1.33011	0	3	5.06806	-1.194	6	8.48431	-1.01422	8	7.28274	0.253589	12	7.91154	1.18024	0	11	6.06585	1.4877	11	10.4573	0.163642	8	7.29604	0.248889	15	9.18681	1.50096
784	0	8	4.19603	1.34491	5	5.59713	-0.267046	3	5.35907	-1.36201	11	5.30114	1.71827	0	5	5.05681	-0.0254062	8	8.4725	-0.167055	13	7.27143	1.58882	12	7.89963	1.18368	0	9	6.10708	0.964308	7	10.4741	-1.31311	8	7.33609	0.234726	14	9.20762	1.28082
785	0	3	4.19358	-0.689113	4	5.59456	-0.797282	17	5.35657	2.82395	11	5.29849	1.71907	1	2	5.04568	-2.15362	18	8.46083	2.2484	10	7.26024	0.866387	9	7.88786	0.370712	0	7	6.1369	0.326222	12	10.5277	0.425015	8	7.3676	0.223587	8	9.25681	-0.444348
786	0	11	4.19116	2.05294	8	5.59202	0.851348	9	5.3541	1.2153	4	5.29587	-0.647934	0	11	5.03468	1.79861	7	8.44929	-0.54778	7	7.24918	-0.0941813	6	7.87623	-0.765969	0	8	6.17737	0.644398	9	10.5438	-0.514603	13	7.4069	1.55125	6	9.27682	-1.33776
787	0	4	4.18877	-0.0943835	9	5.58952	1.13683	10	5.35165	1.46994	4	5.29328	-0.646641	0	6	5.02379	0.398536	7	8.43788	-0.543469	6	7.23824	-0.505509	10	7.86474	0.675229	1	7	6.16631	0.315105	9	10.5322	-0.510745	8	7.39578	0.213623	9	9.26506	-0.0883522
788	0	8	4.1864	1.34831	6	5.58704	0.168591	5	5.34923	-0.156181	5	5.29073	-0.130017	1	3	5.01302	-1.16222	15	8.42661	1.69724	10	7.22742	0.876768	11	7.85338	0.948743	0	6	6.15537	-0.06343	14	10.5208	0.929857	13	7.38478	1.55738	7	9.25343	-0.851717
789	0	4	4.18406	-0.0920303	11	5.58459	1.63281	8	5.34684	0.938034	9	5.2882	1.23727	1	10	5.00237	1.58039	12	8.41547	1.03476	12	7.21671	1.38082	10	7.84215	0.682373	0	6	6.14455	-0.0590122	11	10.5095	0.147896	12	7.3739	1.33544	11	9.24194	0.530075
790	0	5	4.18175	0.365934	2	5.58217	-2.53297	3	5.34448	-1.35358	5	5.28571	-0.127773	1	1	5.03147	-4.03147	11	8.45794	0.766459	9	7.25241	0.58253	11	7.88378	0.939575	0	4	6.13384	-1.06692	11	10.4983	0.151268	9	7.36314	0.545621	17	9.23058	1.88436
791	2	2	4.17946	-1.54111	4	5.57977	-0.789887	2	5.34214	-2.36325	8	5.28324	0.960518	2	6	5.06949	0.379879	11	8.48197	0.759214	13	7.28411	1.5853	11	7.90897	0.931981	1	5	6.12325	-0.502334	14	10.4872	0.938823	6	7.35249	-0.552152	11	9.21936	0.536883
792	0	3	4.1772	-0.679654	6	5.57741	0.172521	7	5.33983	0.627487	7	5.28081	0.649793	3	13	5.05824	2.20265	7	8.47021	-0.555686	6	7.27279	-0.519616	9	7.89711	0.367629	6	4	6.11278	-1.05639	14	10.4763	0.941744	14	7.34195	1.77944	17	9.20827	1.88977
793	1	10	4.17496	1.84204	6	5.57508	0.173475	12	5.33754	1.92329	10	5.2784	1.4931	4	9	5.08673	1.30442	9	8.51206	0.162646	6	7.30789	-0.533945	11	7.93813	0.92319	10	7	6.14254	0.324088	14	10.5299	0.927434	5	7.37341	-1.06142	13	9.25747	1.03799
794	2	9	4.17274	1.60909	7	5.57277	0.539444	13	5.33528	2.12581	8	5.27603	0.96307	11	11	5.16379	1.75968	7	8.58897	-0.600574	13	7.38528	1.55724	7	8.01543	-0.383797	30	7	6.18296	0.308812	11	10.546	0.136899	12	7.41266	1.32425	8	9.2775	-0.451664
795	6	7	4.26626	1.03326	14	5.76214	2.20166	8	5.53007	0.873252	9	5.48247	1.17251	20	7	5.24001	0.665212	9	8.665	0.111667	10	7.46183	0.802641	14	8.09186	1.57902	46	14	6.17185	2.09216	15	10.5344	1.15302	5	7.40149	-1.07398	14	9.26575	1.26528
796	7	10	4.42466	1.76308	5	5.82264	-0.367896	11	5.59075	1.63095	8	5.53067	0.873039	55	12	5.37882	1.91137	11	8.82574	0.655563	8	7.6116	0.137318	7	8.25178	-0.47313	115	10	6.16086	1.21404	12	10.5229	0.426394	5	7.39044	-1.06903	15	9.25414	1.48358
797	18	12	4.4652	2.17511	8	5.90851	0.739453	16	5.67931	2.58017	15	5.62452	2.42074	106	15	5.65771	2.41217	18	9.12707	2.09137	11	7.90208	0.934057	22	8.55307	2.86689	245	8	6.19012	0.639889	20	10.576	2.10728	5	7.42138	-1.08287	16	9.30282	1.67429
798	47	8	4.6323	1.19066	15	6.12487	2.29155	15	5.90123	2.34929	7	5.85204	0.433887	229	14	6.07518	2.118	13	9.56738	0.952037	16	8.33174	1.91707	17	8.9941	1.94172	508	16	6.57888	2.35528	25	11.1509	2.76982	14	7.82412	1.65057	13	9.84528	0.874963
799	90	17	5.08341	2.8902	13	6.77531	1.72642	14	6.56863	1.98612	19	6.54317	2.85779	526	22	7.01011	3.19585	22	10.6585	2.41801	17	9.3434	1.857	13	10.0795	0.809997	1137	17	7.60353	2.27898	32	12.3269	3.47775	19	8.86491	2.32515	29	10.9944	3.34355
800	175	15	5.91925	2.34464	19	7.6553	2.60265	17	7.46876	2.31167	18	7.44705	2.48735	940	18	9.05286	2.10886	21	12.9053	1.7664	19	11.4885	1.72327	38	12.3236	4.16527	1974	27	10.1666	3.23959	39	15.6389	3.74078	31	11.4909	3.50395	42	14.1757	4.29338
801	415	24	7.38352	3.39182	47	9.66604	5.44572	33	9.53101	4.08543	40	9.57391	4.81079	1899	39	13.9961	4.00382	43	18.6332	3.7159	42	16.8166	3.88588	47	18.0243	4.22654	3792	41	15.2625	4.01953	57	21.3439	4.72277	40	16.6582	3.69066	43	19.7722	3.54221
802	788	39	11.2223	4.448	36	14.9467	3.50888	32	14.9461	3.01474	41	15.1606	4.03544	3066	47	24.856	3.23004	63	30.6495	4.07578	61	28.2531	4.19281	73	30.0213	5.03027	5113	58	25.8222	4.22515	85	34.4926	5.47829	60	27.4468	4.2026	88	32.4675	5.91979
803	1564	36	19.6403	2.72661	76	25.4821	5.7948	55	25.7401	3.94541	56	26.2017	3.98197	4848	84	47.3841	3.99513	91	55.9534	3.67389	78	52.1561	2.92624	79	55.2585	2.67113	7159	87	49.7204	3.99679	120	63.2829	5.17754	117	51.804	6.02737	114	60.3987	5.02022
804	2464	64	35.886	3.51425	83	45.9151	4.07059	96	46.6766	5.03405	99	47.6265	5.16323	6027	136	98.1151	3.2486	147	113.376	2.77327	150	106.191	3.57697	150	112.5	3.06189	7927	170	99.8222	5.38239	189	123.287	4.77994	172	102.847	5.2729	210	118.662	6.30291
805	4527	99	71.2255	2.79144	148	93.1599	4.50783	146	95.1119	4.21152	154	97.4715	4.5552	9077	264	197.768	4.07632	239	222.453	1.07031	277	210.575	3.99111	270	221.484	2.95257	10000	286	208.902	4.55889	333	256.014	4.2188	295	214.102	4.71008	330	247.241	4.55573
806	5975	196	145.285	3.6225	215	185.576	2.00671	224	189.796	2.28537	257	194.293	3.91155	8508	439	389.513	2.36191	534	435.886	4.24581	467	413.109	2.49378	491	434.485	2.5505	8439	532	417.947	4.94482	636	496.726	5.52255	492	426.486	2.95362	586	482.347	4.28185
807	8212	353	289.177	3.39698	406	367.727	1.89945	446	376.449	3.29333	414	385.414	1.40492	10000	790	728.157	2.20026	872	801.261	2.39552	845	765.339	2.74042	851	799.915	1.75116	8809	894	802.816	3.04966	1084	950.13	4.06602	856	818.125	1.29452	968	923.653	1.42537
808	8790	620	542.565	3.10986	729	664.8	2.37779	760	680.654	2.8782	759	694.53	2.34011	7705	1302	1267.37	0.959746	1429	1381.3	1.26183	1392	1325.39	1.78536	1485	1380.16	2.7207	6328	1490	1408.07	2.12255	1626	1606.14	0.492399	1568	1430.56	3.47078	1652	1570.41	2.00727
809	10000	1064	973.215	2.7832	1258	1196.71	1.72787	1339	1225.66	3.09749	1345	1251.19	2.55797	7846	2097	2014.85	1.79405	2174	2156.91	0.366503	2189	2088.34	2.15146	2194	2158.05	0.767581	5708	2213	2237.06	-0.511427	2560	2513.25	0.924031	2257	2269.93	-0.272241	2471	2463.26	0.155769
810	8736	1684	1646.98	0.902176	2052	1938.55	2.50449	2066	1984.92	1.78383	2121	2017.42	2.24904	5105	3072	3039.8	0.580936	3159	3251.71	-1.64946	3113	3149.39	-0.652299	3177	3253.73	-1.36123	3534	3262	3265.49	-0.061187	3544	3572.78	-0.483483	3371	3307.26	1.09779	3432	3516.27	-1.43844
811	8513	2549	2548.68	0.00644109	2945	2946.29	-0.0237357	3092	3016.71	1.35405	2999	3060.16	-1.11681	4681	4186	4256.11	-1.08369	4555	4458.7	1.42684	4280	4365.04	-1.29994	4407	4468.26	-0.922814	2896	4366	4471.37	-1.59466	4711	4858.16	-2.14412	4391	4526.21	-2.04049	4590	4786.36	-2.8984
812	6598	3664	3659.42	0.0756247	3994	4076.85	-1.31091	4115	4173.37	-0.909956	4235	4216.26	0.287963	2786	5390	5509.4	-1.62636	5563	5747.29	-2.47091	5534	5639.21	-1.41429	5660	5761.35	-1.34708	1730	5522	5731.01	-2.81262	5966	6062.33	-1.2471	5564	5791.13	-3.04492	5959	5998.07	-0.506077
813	5014	4782	4867.94	-1.24283	5304	5335.81	-0.436847	5273	5462.26	-2.60639	5387	5507.54	-1.64229	2022	6418	6720.34	-3.77398	6766	6909.63	-1.74612	6632	6831.5	-2.4498	6651	6933.78	-3.46739	1056	6605	6877.4	-3.35173	6763	7223.59	-5.60077	6668	6946.38	-3.40905	6996	7154.37	-1.8934
814	3261	5908	6102.5	-2.53047	6229	6494.34	-3.36192	6331	6647.61	-3.97916	6530	6678.81	-1.84149	1092	7541	7747.71	-2.38042	7598	7940.36	-3.9277	7653	7864.71	-2.42002	7808	7969.75	-1.83054	608	7530	7887.51	-4.11999	7759	8141.91	-4.34703	7685	7957.99	-3.11406	7720	8085.77	-4.16294
815	2451	6936	7205.21	-3.23244	7486	7573.94	-1.01636	7557	7753.74	-2.2632	7381	7776.78	-4.60683	844	8220	8601.27	-4.20528	8630	8732.83	-1.10693	8280	8693.4	-4.54309	8710	8770.94	-0.652922	408	8389	8653.59	-2.88883	8584	8883.61	-3.23378	8411	8728.08	-3.45737	8551	8828.71	-3.00318
816	1337	7854	8180.81	-3.68764	8062	8440.79	-4.2187	8234	8642.06	-4.49695	8321	8645.82	-3.56083	376	8997	9204.42	-2.18679	9051	9324.22	-2.87187	8941	9294.65	-3.74002	9002	9366.01	-3.83654	179	8823	9228.57	-4.31775	9225	9375.57	-1.56767	8904	9302.25	-4.22051	9128	9331.85	-2.13366
817	957	8527	8903.76	-4.08009	8708	9072.95	-3.91092	9109	9291.41	-1.91123	9021	9277.82	-2.70396	314	9409	9647.8	-2.46183	9681	9722.63	-0.423142	9394	9720.14	-3.36491	9586	9769.48	-1.87404	135	9245	9587.16	-3.55853	9551	9706.9	-1.59526	9478	9662	-1.88999	9460	9664.68	-2.10437
818	482	8888	9396.41	-5.39274	9175	9467.43	-3.05291	9370	9698.24	-3.39093	9544	9666.25	-1.25136	157	9499	9889.8	-4.0097	9920	9943.45	-0.235436	9646	9955.12	-3.14738	9977	9992.47	-0.154836	55	9504	9819.79	-3.23929	9678	9892.12	-2.17657	9587	9893.74	-3.13279	9830	9854.83	-0.250458
819	346	9354	9694.29	-3.5184	9628	9716.08	-0.897636	9761	9956.98	-1.98362	9940	9912.63	0.274506	104	9755	10010.5	-2.58696	9907	10038.8	-1.32384	9715	10066.6	-3.56677	9848	10089.5	-2.43387	44	9806	9916.7	-1.11786	9915	9959.24	-0.444255	9718	9989.92	-2.75834	9575	9923.86	-3.56518
820	174	9687	9864.25	-1.80096	9725	9822.17	-0.985322	9967	10070	-1.03182	9898	10011.5	-1.14114	50	9730	10041.5	-3.15785	9952	10059	-1.07203	9948	10095	-1.4735	10000	10109.9	-1.09895	22	9899	9931.93	-0.331012	9873	9952.75	-0.802662	10000	10004.4	-0.04375	9888	9917.95	-0.301154
821	143	9825	9918.78	-0.946167	10000	9850.83	1.49169	9913	10104.5	-1.9232	9939	10036.7	-0.97976	40	9764	10023.1	-2.62215	9895	10024.8	-1.30463	9748	10071.5	-3.27659	9964	10076	-1.12186	20	9917	9899.45	0.176221	10000	9907.62	0.923838	9992	9971.34	0.206635	9784	9871.88	-0.888427
822	88	9704	9916.64	-2.15858	9779	9818.44	-0.398826	10000	10076.5	-0.764902	10000	9998.94	0.0106445	25	10000	9964.41	0.355938	9872	9959.12	-0.876802	9960	10011.8	-0.518832	9936	10009.7	-0.739725	6	10001	9837.46	1.6353	9890	9831.87	0.584493	9792	9908.54	-1.17769	10000	9795.47	2.04534
823	56	9788	9867.4	-0.802596	9799	9756.57	0.428656	9921	10018.5	-0.979296	9893	9933.56	-0.407764	25	9846	9891.56	-0.459155	10000	9877.27	1.22726	9799	9936.86	-1.39271	9894	9927.38	-0.335582	12	9499	9755.42	-2.63097	9671	9742.96	-0.731698	9917	9825.96	0.914202	9719	9704.77	0.144317
824	36	9669	9798.55	-1.31744	9547	9673.5	-1.29462	9871	9938.82	-0.68262	9922	9846.35	0.759481	14	9721	9803.88	-0.840648	9811	9782.93	0.283384	10000	9848.14	1.51863	9798	9832.29	-0.346397	4	9509	9665.86	-1.60863	9871	9645.27	2.27195	9686	9735.73	-0.505311	9684	9605.61	0.796593
825	29	10000	9714.31	2.85695	9607	9582.43	0.250688	9947	9850.92	0.963357	9863	9752.02	1.11749	16	9763	9709.6	0.540387	9594	9682.05	-0.898975	9756	9752.77	0.0326765	9833	9730.64	1.03227	7	9657	9570.3	0.882285	9479	9544.24	-0.670072	9678	9639.61	0.390231	9453	9502.71	-0.51131
826	20	9547	9625.61	-0.804508	9688	9485.85	2.05378	9713	9757.26	-0.449099	9790	9651.94	1.39532	9	9700	9611.51	0.898522	9628	9578.43	0.505219	9800	9654.03	1.47448	9824	9626.16	1.99606	0	9730	9473.53	2.60001	9459	9441.71	0.177766	9530	9542.26	-0.125554	9477	9398.45	0.806831
827	13	9639	9531.62	1.09373	9518	9385.32	1.35994	9868	9659.47	2.09924	9684	9548.03	1.38166	7	9568	9512.75	0.564835	9785	9474.15	3.14244	9577	9554.59	0.229007	9634	9521.05	1.1508	1	9350	9375.95	-0.268381	9463	9339.22	1.27241	9633	9444.13	1.92435	9375	9294.17	0.83482
828	13	9481	9434.95	0.472904	9382	9282.88	1.0233	9425	9559.61	-1.38652	9488	9442.3	0.469191	6	9349	9413.9	-0.67125	9638	9370.24	2.72745	9595	9455.21	1.42706	9567	9416.28	1.54095	1	9335	9278.39	0.58589	9299	9236.43	0.648808	9347	9346	0.0103838	9414	9189.71	2.31162
829	11	9512	9337.31	1.79114	9284	9180.27	1.07658	9465	9459.46	0.0569546	9539	9336.51	2.07322	5	9286	9315.44	-0.305554	9146	9266.59	-1.26092	9278	9356.12	-0.811007	9380	9311.81	0.70412	1	9192	9181.15	0.113185	9038	9134.82	-1.01841	9321	9248.23	0.753785	9051	9086.36	-0.371659
830	8	9261	9239.7	0.221323	9221	9077.72	1.4921	9488	9359.26	1.32163	9303	9230.82	0.748358	5	9201	9217.33	-0.170254	9344	9163.69	1.86534	9279	9257.51	0.223106	9240	9208.07	0.332128	2	9057	9084.92	-0.293405	9031	9033.82	-0.0296776	9214	9151.45	0.651631	9193	8983.77	2.18225
831	7	9146	9142.06	0.0412438	9192	8975.37	2.25949	9294	9259.16	0.361379	9254	9125.38	1.33704	5	9149	9120.01	0.303126	9016	9061.5	-0.479166	9102	9159.6	-0.603772	9103	9105.08	-0.0218015	4	8818	8989.28	-1.82402	9102	8933.93	1.76162	9146	9055.29	0.948494	8932	8882.26	0.526249
832	7	8919	9044.9	-1.33309	9018	8874	1.51643	9117	9159.94	-0.449698	8911	9021.01	-1.16541	1	9050	9023.07	0.283058	8933	8959.92	-0.284875	9078	9062.15	0.166391	8924	9002.71	-0.83316	1	8883	8894.49	-0.121944	8954	8834.65	1.26126	9043	8959.97	0.873184	8840	8781.48	0.622376
833	8	8979	8948.71	0.319638	8675	8773.61	-1.05877	9002	9061.62	-0.628371	9004	8917.68	0.909673	8	9041	8926.98	1.19913	8752	8859.33	-1.14729	9119	8965.55	1.60691	8961	8901.32	0.630405	1	8790	8800.23	-0.109161	8829	8736.28	0.98674	8886	8865.19	0.220744	8699	8681.62	0.186353
834	11	8863	8853.27	0.103358	8600	8674.05	-0.798457	8865	8964.02	-1.0517	8816	8815.21	0.0084454	5	8905	8831.8	0.775692	8775	8759.76	0.162682	8860	8869.87	-0.1049	8813	8800.98	0.128034	0	8692	8707.03	-0.161268	8710	8639.06	0.760093	8815	8771.48	0.463494	8462	8582.96	-1.31489
835	11	8715	8758.58	-0.466783	8592	8575.45	0.178544	8991	8867.31	1.30446	8735	8713.77	0.227158	10	8823	8737.58	0.90935	8740	8661.29	0.841937	8849	8775.18	0.784745	8574	8701.75	-1.37962	1	8565	8614.83	-0.53847	8585	8542.95	0.453852	8724	8678.78	0.484139	8573	8485.45	0.94558
836	6	8757	8664.84	0.984788	8535	8477.98	0.617162	8915	8771.65	1.51829	8559	8613.52	-0.589327	3	8631	8644.4	-0.14423	8539	8563.96	-0.270099	8792	8681.52	1.17821	8462	8603.67	-1.54006	1	8744	8523.68	2.35612	8515	8448.02	0.725801	8545	8587.14	-0.455811	8388	8389.17	-0.012806
837	8	8637	8572.2	0.697267	8310	8381.77	-0.787267	8614	8677.15	-0.680436	8665	8514.59	1.61585	5	8622	8551.98	0.754076	8481	8467.41	0.147525	8446	8588.6	-1.55168	8389	8506.4	-1.28174	0	8424	8433.7	-0.10574	8302	8354.42	-0.575357	8351	8496.68	-1.59412	8270	8294.26	-0.266757
838	3	8446	8480.81	-0.378789	8300	8287.02	0.142468	8472	8584.06	-1.21747	8254	8417.19	-1.79628	4	8402	8460.7	-0.640449	8377	8372.36	0.0506922	8425	8496.94	-0.783822	8419	8410.61	0.0914139	1	8383	8344.66	0.418703	8282	8261.67	0.22334	8225	8407.15	-2.00845	8009	8200.27	-2.13729
839	8	8323	8390.69	-0.741939	8130	8193.49	-0.704177	8530	8492.11	0.410237	8216	8321.05	-1.15899	3	8256	8370.78	-1.26328	8327	8278.55	0.530958	8471	8406.55	0.700256	8482	8316.1	1.80134	3	8310	8256.34	0.588642	8001	8169.85	-1.88771	8202	8318.35	-1.28471	8035	8107.24	-0.805909
840	11	8263	8301.31	-0.421421	7899	8100.56	-2.26792	8369	8400.67	-0.346219	8094	8225.52	-1.46186	5	8251	8281.93	-0.340515	8176	8186.08	-0.111495	8193	8317.31	-1.37338	8118	8222.94	-1.16466	0	8070	8168.92	-1.10115	8006	8079.01	-0.815979	8287	8230.46	0.621094	8140	8015.23	1.38287
841	5	8246	8212.59	0.367923	7916	8008.76	-1.04259	8180	8310.29	-1.44057	8065	8131.21	-0.737228	2	8177	8194	-0.187954	7669	8094.37	-4.85734	8128	8228.88	-1.1189	7914	8130.56	-2.4343	1	8175	8082.42	1.02389	7953	7989.24	-0.406352	8247	8143.5	1.13966	7817	7924.33	-1.21399
842	6	8114	8124.77	-0.119564	7799	7917.6	-1.34302	8211	8220.47	-0.104484	8009	8037.53	-0.318837	7	8141	8106.6	0.381225	8004	8003.49	0.00564881	8157	8141.08	0.176274	8120	8039.01	0.898766	2	7923	7996.9	-0.830286	7938	7900.51	0.420749	7919	8057.53	-1.55669	7853	7834.52	0.208482
843	10	8081	8037.75	0.481169	7604	7827.85	-2.5671	8029	8131.99	-1.14943	8006	7945.39	0.677385	4	8024	8020.26	0.0417654	7708	7913.7	-2.34293	8076	8054.31	0.241373	7753	7948.56	-2.22102	1	7869	7912.26	-0.487674	7830	7812.73	0.195142	7940	7972.43	-0.363975	7640	7745.7	-1.20934
844	3	8057	7952.26	1.16692	7486	7739.63	-2.93142	7982	8044.99	-0.70504	7745	7854.82	-1.24785	5	7890	7934.72	-0.503422	7610	7824.8	-2.4623	8090	7968.35	1.35253	7826	7859.02	-0.373295	1	7868	7828.51	0.445202	7630	7725.99	-1.09887	7861	7888.24	-0.307225	7486	7657.95	-1.98737
845	9	7712	7867.66	-1.77256	7811	7651.94	1.79967	7771	7958.44	-2.12627	7722	7764.76	-0.486548	4	7886	7850.16	0.40361	7613	7737.04	-1.42166	7882	7883.41	-0.0158561	7590	7770.64	-2.07339	1	7648	7745.83	-1.11865	7489	7640.45	-1.75007	7686	7805.13	-1.3588	7245	7571.44	-3.83513
846	7	7801	7783.54	0.197655	7566	7565.19	0.00934654	7885	7872.75	0.137971	7636	7675.71	-0.454463	6	7749	7766.49	-0.198688	7468	7650.16	-2.1079	7720	7799.31	-0.902689	7645	7683.14	-0.436174	1	7613	7664.03	-0.584829	7402	7555.71	-1.78658	7856	7722.89	1.50184	7422	7485.78	-0.740376
847	14	7672	7700.64	-0.326929	7382	7479.89	-1.13929	7833	7788.46	0.503215	7589	7588.2	0.00916982	2	7618	7683.82	-0.754101	7633	7564.54	0.783613	7657	7716.31	-0.677751	7590	7596.9	-0.0792275	1	7481	7582.93	-1.1785	7409	7471.88	-0.73052	7628	7641.36	-0.153023	7276	7401.06	-1.46615
848	10	7604	7618.63	-0.167778	7270	7395.02	-1.46626	7768	7704.53	0.720132	7410	7501.08	-1.05807	5	7612	7602.25	0.11173	7434	7479.93	-0.532745	7626	7634.33	-0.0953616	7341	7511.71	-1.99242	1	7594	7502.81	1.04637	7313	7389.13	-0.890246	7501	7560.83	-0.690806	7384	7317.45	0.774446
849	10	7683	7537.24	1.66297	7504	7311.52	2.22202	7804	7621.91	2.06119	7315	7415.46	-1.17462	3	7556	7521.4	0.397994	7311	7396.22	-0.996699	7613	7553.12	0.686327	7427	7427.42	-0.00482162	0	7409	7423.57	-0.169308	7262	7307.26	-0.531156	7666	7481.17	2.11101	7339	7234.77	1.21664
850	5	7430	7457.15	-0.314939	7218	7229	-0.129446	7483	7540.22	-0.661421	7074	7330.81	-3.05343	3	7485	7441.45	0.503317	7167	7313.45	-1.7299	7582	7472.79	1.25424	7409	7344.07	0.754294	0	7344	7345.1	-0.0128256	7236	7226.28	0.114228	7385	7402.28	-0.201134	7142	7153.01	-0.13026
851	8	7215	7378.12	-1.92042	7074	7148.08	-0.880835	7460	7460.08	-0.000961058	7291	7247.89	0.504868	6	7294	7362.43	-0.801215	7216	7231.75	-0.185392	7322	7393.42	-0.834639	7211	7261.81	-0.59834	1	7334	7267.46	0.776934	7121	7146.22	-0.298885	7178	7324.24	-1.72614	7090	7072.2	0.21144
852	3	7301	7300.36	0.00748029	6872	7067.96	-2.36386	7470	7380.67	1.03357	7106	7165.71	-0.708357	1	7244	7284.17	-0.471915	7185	7150.76	0.403917	7462	7314.76	1.70451	7244	7180.28	0.74866	0	7234	7190.66	0.509575	7168	7067.07	1.19214	7242	7247.04	-0.0592077	6939	6992.33	-0.640159
853	3	7202	7223.12	-0.248817	7003	6988.64	0.171643	7252	7302	-0.587162	7036	7084.4	-0.577054	5	7208	7206.64	0.0160748	7094	7070.74	0.276148	7189	7236.91	-0.565053	6947	7099.72	-1.83225	0	7174	7114.68	0.70042	7058	6988.81	0.823532	7082	7170.66	-1.05352	6865	6913.39	-0.583967
854	6	7108	7146.47	-0.4563	6887	6909.74	-0.274042	7224	7223.69	0.00360779	6895	7003.52	-1.30687	1	7023	7130.06	-1.27751	7025	6991.64	0.397976	7160	7159.97	0.000375083	7165	7020.09	1.71192	0	7106	7039.5	0.788848	6916	6911.44	0.0547685	7014	7095.1	-0.968317	6859	6835.36	0.285408
855	7	7203	7070.4	1.56245	6749	6831.91	-1.00917	7217	7146.4	0.831101	6972	6923.78	0.577439	4	7058	7054.16	0.0456711	6827	6913.35	-1.04502	7056	7083.73	-0.330142	6952	6941.27	0.128625	1	6896	6965.09	-0.832038	6765	6834.89	-0.849732	7048	7020.3	0.329946	6688	6758.19	-0.858264
856	5	7096	6995.16	1.1971	6696	6754.58	-0.715901	7094	7069.54	0.290368	6696	6844.54	-1.81522	5	6989	6979.28	0.116212	6864	6836.21	0.335458	7249	7008.55	2.82411	6875	6863.62	0.137182	1	6877	6891.43	-0.174009	6733	6759.18	-0.318997	7086	6946.25	1.66012	6748	6681.88	0.804896
857	2	6926	6920.33	0.0681648	6616	6677.99	-0.762166	7037	6993.37	0.520058	6777	6766.1	0.132446	1	7018	6905.14	1.34719	6736	6759.7	-0.288793	6965	6934.03	0.371105	6890	6786.63	1.24533	1	6872	6818.59	0.644262	6569	6684.38	-1.42361	6909	6873.04	0.432619	6641	6606.52	0.423101
858	1	6841	6846.47	-0.0661252	6552	6602.61	-0.6252	6947	6918.36	0.343583	6748	6688.92	0.719224	0	7011	6831.67	2.14173	6839	6684.14	1.87262	6963	6860.27	1.23106	6734	6710.57	0.285516	0	6833	6746.54	1.0459	6652	6610.4	0.510045	6751	6800.62	-0.6039	6491	6532.01	-0.508986
859	4	6858	6773.73	1.01762	6606	6528.31	0.955923	6902	6844.39	0.693435	6696	6612.85	1.01611	3	6789	6759.06	0.363399	6704	6609.33	1.15623	6935	6787.3	1.77356	6579	6635.29	-0.693981	1	6838	6675.22	1.96856	6409	6537.23	-1.60174	6787	6728.92	0.704981	6552	6458.33	1.15723
860	3	6780	6701.77	0.95007	6313	6454.71	-1.78351	6740	6771.07	-0.378433	6565	6537.5	0.339403	4	6604	6687.11	-1.02276	6451	6535.41	-1.051	6817	6715.08	1.23442	6683	6560.9	1.4936	0	6607	6604.65	0.0289364	6444	6464.89	-0.260197	6778	6657.99	1.45769	6322	6385.51	-0.798711
861	4	6681	6630.28	0.620479	6527	6381.6	1.7997	6889	6698.18	2.29902	6478	6462.66	0.190584	2	6570	6616.26	-0.570657	6640	6462.61	2.17698	6903	6643.92	3.11823	6537	6487.63	0.610625	0	6566	6534.88	0.384113	6412	6393.43	0.23193	6450	6587.86	-1.71654	6276	6313.59	-0.474492
862	3	6483	6559.28	-0.94735	6320	6309.15	0.136476	6676	6625.9	0.613193	6413	6388.52	0.305714	1	6786	6545.99	2.91353	6486	6390.35	1.18763	6729	6573.32	1.89787	6557	6414.93	1.75446	0	6632	6465.9	2.03964	6464	6322.81	1.75617	6546	6518.53	0.339557	6206	6242.54	-0.463828
863	1	6638	6489.12	1.82736	6319	6237.81	1.0213	6654	6554.69	1.21741	6464	6315.56	1.84632	2	6609	6476.14	1.63425	6314	6318.65	-0.0585367	6605	6503.16	1.25307	6533	6342.79	2.35335	1	6439	6397.66	0.515211	6144	6252.98	-1.39037	6533	6449.94	1.02768	6222	6172.31	0.629891
864	4	6394	6419.93	-0.324316	6327	6167.31	2.00754	6646	6484.28	1.98375	6305	6243.44	0.775295	2	6448	6407.17	0.508461	6336	6247.97	1.10598	6629	6433.92	2.39596	6402	6271.66	1.62899	2	6388	6330.11	0.724349	6325	6183.89	1.77435	6573	6382.04	2.35543	6131	6102.84	0.359585
865	0	6429	6351.47	0.966897	6249	6097.71	1.91386	6582	6414.71	2.06196	6168	6172.26	-0.0542206	1	6428	6339.22	1.10733	6218	6178.33	0.503116	6583	6365.7	2.67828	6322	6201.6	1.5143	0	6258	6263.27	-0.0665629	6213	6115.61	1.2356	6416	6314.85	1.26275	6123	6034.21	1.13472
866	7	6207	6283.8	-0.974808	6037	6028.85	0.104904	6584	6345.85	2.93496	6142	6101.84	0.512418	0	6457	6271.96	2.30276	6231	6109.38	1.54077	6393	6298.13	1.18649	6261	6132.23	1.62736	0	6256	6197.15	0.744044	6077	6048.06	0.371188	6405	6248.4	1.95678	5982	5966.34	0.202469
867	7	6326	6216.68	1.37442	6203	5960.56	3.07825	6270	6277.51	-0.0948711	6141	6032.01	1.39076	1	6257	6205.21	0.654682	6104	6041.02	0.806099	6366	6231.1	1.6908	6146	6063.47	1.05274	0	6212	6131.69	1.01896	6009	5981.26	0.357882	6272	6182.6	1.12885	6040	5899.23	1.81134
868	5	6253	6150.29	1.29893	5925	5893.3	0.411798	6412	6210.17	2.52048	6029	5963.29	0.846294	1	6175	6139.18	0.455845	5883	5973.48	-1.17967	6286	6164.8	1.52873	6083	5995.53	1.12155	0	6172	6066.93	1.33744	5927	5915.21	0.153188	6169	6117.51	0.655624	5975	5832.89	1.83844
869	1	6159	6084.67	0.947074	5804	5826.54	-0.295876	6335	6143.28	2.40878	6027	5895.03	1.69987	0	6098	6073.94	0.308077	5883	5906.77	-0.309976	6177	6099.29	0.988778	6177	5928.43	3.16275	1	6085	6002.9	1.05252	5857	5849.97	0.0919	6253	6053.15	2.52734	5839	5767.39	0.937196
870	1	6059	6019.8	0.503621	5847	5761.12	1.1231	6165	6077.71	1.11178	5903	5828.24	0.973093	0	6158	6009.35	1.89426	5878	5840.75	0.485848	6091	6034.42	0.724962	5911	5862.02	0.637078	0	6069	5939.66	1.66022	5851	5785.59	0.855113	6157	5989.59	2.1335	5921	5702.76	2.83616
871	4	6043	5956.22	1.11634	5772	5696.7	0.991117	6159	6013.1	1.85914	5830	5762.42	0.885039	1	6088	5945.35	1.82829	6001	5775.38	2.91255	6029	5970.15	0.757979	5924	5796.27	1.65957	0	6085	5877.08	2.66541	5846	5721.82	1.62412	6026	5926.69	1.27937	5683	5638.78	0.586541
872	5	5857	5893.24	-0.473504	5684	5632.83	0.678683	5945	5948.99	-0.0518148	5722	5697.17	0.328237	1	6093	5882.03	2.70277	5906	5710.77	2.54037	6069	5906.57	2.08495	5825	5731.29	1.22783	0	5958	5815.04	1.85214	5820	5658.7	2.1143	6051	5864.32	2.3998	5751	5575.47	2.31469
873	2	5939	5830.58	1.40692	5707	5569.24	1.82357	6017	5885.12	1.70013	5764	5632.2	1.73604	2	5777	5819.45	-0.558468	5758	5646.94	1.46355	5865	5843.74	0.277616	5849	5667.1	2.37844	1	5896	5753.66	1.85379	5717	5596.3	1.59637	5969	5802.63	2.15344	5442	5512.88	-0.960811
874	1	5857	5768.26	1.15951	5707	5506.25	2.65734	5978	5821.82	2.01999	5560	5567.88	-0.105717	0	5818	5757.51	0.793072	5751	5583.8	2.20482	5835	5781.54	0.699823	5754	5603.6	1.98276	0	5810	5692.93	1.53588	5695	5534.6	2.12553	5884	5741.59	1.85655	5567	5451.02	1.55447
875	0	5875	5706.78	2.19468	5483	5444.3	0.522622	5932	5759.53	2.23933	5511	5504.66	0.0854208	1	5870	5696.19	2.26854	5711	5521.34	2.50969	5928	5719.98	2.70178	5814	5540.79	3.58308	0	5745	5632.89	1.47908	5665	5473.66	2.54223	5635	5681.24	-0.616041	5532	5389.93	1.91011
876	1	5966	5646.28	4.13933	5378	5383.28	-0.071949	5806	5698.13	1.41565	5555	5442.38	1.5111	1	5734	5635.59	1.29966	5607	5459.65	1.96777	5906	5659.14	3.21228	5657	5478.76	2.36975	0	5605	5573.51	0.420664	5491	5413.37	1.04765	5783	5621.55	2.12304	5421	5329.52	1.24243
877	2	5716	5586.37	1.71455	5476	5322.7	2.07168	5605	5637.14	-0.429266	5454	5380.53	0.994868	1	5605	5575.69	0.391569	5440	5398.71	0.559784	5821	5598.99	2.90981	5492	5417.49	1.00546	0	5699	5514.7	2.44129	5361	5353.73	0.099265	5835	5562.45	3.56806	5255	5269.78	-0.203897
878	1	5640	5526.82	1.50707	5296	5262.62	0.458701	5734	5576.61	2.07846	5181	5319.22	-1.92026	0	5680	5516.5	2.16943	5450	5338.56	1.5096	5723	5539.58	2.42452	5413	5357	0.761115	0	5606	5456.53	1.99635	5438	5294.77	1.9423	5691	5503.97	2.47923	5386	5210.73	2.38823
879	1	5728	5467.79	3.43818	5365	5203.12	2.21012	5575	5516.63	0.781764	5328	5258.51	0.952044	0	5793	5457.93	4.40233	5375	5279.01	1.30933	5611	5480.77	1.7386	5525	5297.14	3.06556	0	5624	5399.01	3.00011	5416	5236.54	2.43858	5477	5446.16	0.41671	5363	5152.42	2.87549
880	0	5600	5409.37	2.54741	5333	5144.37	2.58302	5641	5457.37	2.44491	5278	5198.59	1.09309	1	5544	5399.91	1.93515	5450	5220.1	3.11411	5445	5422.53	0.304568	5379	5237.92	1.92365	0	5403	5342.12	0.828227	5324	5178.92	1.98828	5554	5388.98	2.21435	5157	5094.76	0.866749
881	2	5482	5351.72	1.75961	5109	5086.44	0.31568	5456	5398.9	0.77301	5331	5139.51	2.62265	0	5467	5342.57	1.68283	5302	5161.91	1.92391	5567	5364.96	2.70786	5198	5179.42	0.25775	0	5455	5285.79	2.29107	5176	5121.93	0.751516	5525	5332.35	2.59181	5069	5037.73	0.439246
882	0	5279	5294.73	-0.216531	5139	5029.11	1.53289	5427	5341.01	1.16726	5255	5081.05	2.39961	0	5381	5285.86	1.29702	5348	5104.39	3.33123	5540	5308.02	3.11668	5229	5121.59	1.48536	0	5274	5230.05	0.605135	5078	5065.58	0.174228	5282	5276.33	0.0780351	5210	4981.35	3.16769
883	1	5296	5238.29	0.793067	4900	4972.42	-1.03459	5277	5283.72	-0.0925505	5221	5023.25	2.73677	0	5310	5229.72	1.10174	5150	5047.47	1.42874	5280	5251.66	0.390068	5229	5064.38	2.27656	0	5318	5174.91	1.96211	5219	5009.87	2.89481	5381	5220.9	2.18246	4930	4925.63	0.0621774
884	1	5299	5182.41	1.60163	4924	4916.3	0.109741	5312	5226.98	1.16658	5200	4966.03	3.24453	1	5262	5174.14	1.21124	5156	4991.17	2.29555	5278	5195.86	1.13062	5105	5007.79	1.36058	0	5294	5120.36	2.38644	5133	4954.79	2.48745	5325	5166.07	2.17793	5014	4870.56	2.02577
885	0	5378	5127.16	3.42041	4968	4860.99	1.5182	5419	5171.02	3.36866	5117	4909.68	2.89829	0	5110	5119.2	-0.128709	4985	4935.56	0.700168	5273	5140.72	1.82168	5026	4951.9	1.04521	0	5189	5066.39	1.70204	5066	4900.32	2.32772	5315	5111.82	2.78693	4953	4816.11	1.94505
886	0	5366	5072.59	4.00544	4902	4806.2	1.36829	5356	5115.55	3.28552	4824	4853.83	-0.429453	1	5261	5064.87	2.70402	5085	4880.58	2.86664	5165	5086.17	1.09686	5104	4896.64	2.90246	0	5282	5013	3.70128	4811	4846.47	-0.511404	5168	5058.15	1.52804	4974	4762.3	3.00176
887	0	5080	5018.49	0.862934	4886	4752.07	1.91599	5230	5060.72	2.34074	4723	4798.68	-1.10126	0	5088	5011.08	1.07836	4883	4826.19	0.812935	5129	5032.17	1.35199	4859	4841.98	0.244153	0	5030	4960.18	0.984494	4948	4793.23	2.20028	5035	5005.05	0.422044	4917	4709.1	2.96485
888	0	5171	4965.07	2.86375	4725	4698.6	0.383991	5063	5006.53	0.79366	4864	4744.21	1.71755	0	5145	4957.87	2.60881	4858	4772.43	1.22773	5039	4978.76	0.848567	4898	4787.95	1.57248	0	5151	4907.92	3.38696	4869	4740.58	1.84036	4965	4952.52	0.177121	4703	4656.52	0.677792
889	0	4966	4912.18	0.763728	4656	4645.67	0.151426	5061	4952.84	1.5204	4717	4690.29	0.388952	0	5043	4905.28	1.93928	4872	4719.33	2.18724	5120	4925.98	2.71151	4811	4734.59	1.1016	0	4933	4856.21	1.09329	4847	4688.53	2.27618	5102	4900.55	2.82037	4734	4604.54	1.88156
890	0	4862	4859.79	0.031659	4656	4593.31	0.918673	5025	4899.71	1.76748	4801	4636.97	2.36733	0	4897	4853.27	0.624842	4873	4666.82	2.9535	4895	4873.77	0.303503	4805	4681.83	1.77686	1	4783	4805.06	-0.318975	4747	4637.06	1.5956	4956	4849.12	1.51813	4657	4553.16	1.52161
891	1	4997	4807.98	2.67399	4628	4541.57	1.27048	4851	4847.16	0.0550612	4597	4584.28	0.187611	1	5018	4801.82	3.05177	4784	4614.94	2.44428	4845	4822.12	0.328684	4667	4629.69	0.546101	0	4742	4754.45	-0.180834	4628	4586.18	0.614753	4950	4798.25	2.15683	4580	4502.38	1.14702
892	0	4912	4756.73	2.21547	4503	4490.43	0.187376	4845	4795.2	0.715438	4642	4532.21	1.61143	0	4790	4750.93	0.564492	4713	4563.63	2.17584	4850	4771.03	1.13388	4671	4578.14	1.35873	0	4899	4704.39	2.78049	4700	4535.86	2.39415	4886	4747.92	1.97535	4425	4452.17	-0.408465
893	0	4797	4706.04	1.31335	4568	4439.88	1.89568	4855	4743.81	1.59579	4500	4480.75	0.286918	0	4649	4700.55	-0.755994	4619	4512.87	1.56164	4772	4720.46	0.746096	4573	4527.14	0.678182	0	4709	4654.85	0.789081	4553	4486.12	0.99121	4785	4698.13	1.25585	4510	4402.55	1.60006
894	0	4733	4655.9	1.1207	4445	4389.91	0.826252	4674	4692.98	-0.277663	4530	4429.9	1.48724	0	4691	4650.71	0.58829	4545	4462.69	1.22097	4732	4670.43	0.895004	4514	4476.73	0.554806	0	4704	4605.85	1.43112	4456	4436.93	0.285698	4693	4648.86	0.644266	4492	4353.49	2.06661
895	0	4689	4606.35	1.20691	4416	4340.62	1.13432	4651	4642.81	0.12009	4354	4379.74	-0.390167	0	4788	4601.41	2.69659	4403	4413.08	-0.151919	4643	4620.95	0.323605	4461	4426.89	0.510705	0	4625	4557.36	0.994564	4484	4388.29	1.42925	4523	4600.12	-1.14678	4317	4305	0.182645
896	0	4607	4557.38	0.731017	4319	4291.84	0.413269	4612	4593.13	0.277906	4412	4330.1	1.23293	0	4460	4552.68	-1.38783	4382	4364.1	0.270479	4563	4572.05	-0.133965	4306	4377.68	-1.09234	0	4603	4509.44	1.37908	4302	4340.27	-0.583462	4481	4551.94	-1.05983	4460	4257.12	3.03781
897	1	4582	4508.87	1.0804	4356	4243.6	1.70311	4685	4543.96	2.06059	4375	4281.02	1.4208	0	4638	4504.5	1.96033	4296	4315.65	-0.299835	4635	4523.68	1.63519	4369	4329.02	0.604892	0	4557	4462.03	1.40684	4306	4292.75	0.201957	4544	4504.29	0.589132	4182	4209.77	-0.429475
898	0	4449	4460.88	-0.178122	4239	4195.91	0.661855	4698	4495.33	2.95684	4147	4232.52	-1.32795	0	4609	4456.78	2.24216	4298	4267.73	0.461766	4646	4475.78	2.49726	4218	4280.88	-0.968155	0	4394	4415.08	-0.318004	4389	4245.73	2.16254	4456	4457.09	-0.0162679	4226	4162.93	0.970145
899	0	4350	4413.42	-0.961541	4317	4148.77	2.56036	4418	4447.24	-0.439914	4202	4184.58	0.268739	0	4416	4409.58	0.0965717	4235	4220.35	0.225132	4343	4428.41	-1.29601	4276	4233.29	0.653154	0	4425	4368.63	0.847429	4234	4199.25	0.534099	4436	4410.39	0.384557	4394	4116.63	4.18435
900	2	4473	4366.47	1.59281	4251	4102.19	2.28243	4442	4399.68	0.635016	4165	4137.2	0.430683	0	4437	4362.9	1.1125	4289	4173.51	1.76342	4311	4381.55	-1.07449	4163	4186.25	-0.360301	0	4414	4322.67	1.37463	4184	4153.28	0.474883	4451	4364.19	1.30126	4060	4070.86	-0.170436
901	0	4406	4320.08	1.29436	4025	4056.23	-0.492254	4413	4352.73	0.907258	4087	4090.49	-0.0545224	0	4346	4316.71	0.444247	4212	4127.21	1.30646	4356	4335.2	0.3152	4142	4139.74	0.0350591	0	4265	4277.21	-0.186903	4128	4107.83	0.313863	4335	4318.48	0.250983	3973	4025.61	-0.834727
902	0	4292	4274.23	0.27122	3936	4010.74	-1.19139	4396	4306.24	1.35385	4038	4044.24	-0.098186	0	4348	4271.03	1.16727	3976	4081.44	-1.67214	4358	4289.35	1.03997	4051	4093.77	-0.672037	0	4214	4232.22	-0.280737	4115	4062.9	0.812232	4396	4273.25	1.85135	4089	3980.89	1.6907
903	0	4307	4228.8	1.19154	4025	3965.76	0.933818	4355	4260.22	1.43619	4064	3998.51	1.0273	0	4255	4225.84	0.446981	4030	4036.19	-0.0974528	4299	4243.99	0.838951	3915	4048.33	-2.13089	0	4201	4187.72	0.204872	4031	4018.46	0.197462	4333	4228.51	1.58741	4074	3936.67	2.15151
904	0	4178	4183.96	-0.0922589	3942	3921.48	0.326848	4275	4214.91	0.919022	3964	3953.53	0.166372	0	4074	4181.15	-1.67865	4168	3991.45	2.73463	4232	4199.13	0.505276	4030	4003.41	0.418908	0	3958	4143.69	-2.95159	3932	3974.53	-0.678225	4105	4184.24	-1.23677	3834	3892.97	-0.952309
905	0	4125	4139.68	-0.228547	3853	3877.59	-0.396104	4047	4169.97	-1.93292	3975	3908.91	1.04823	0	4106	4136.93	-0.482687	3852	3947.23	-1.53433	4193	4154.75	0.590657	3956	3959	-0.0476584	0	4139	4100.13	0.604145	3831	3931.09	-1.61704	4141	4140.44	0.00865012	3825	3849.76	-0.400346
906	0	4086	4095.71	-0.151969	3849	3834.14	0.239543	4107	4125.45	-0.287852	3919	3864.77	0.866318	0	4145	4093.19	0.804695	3928	3903.51	0.390796	3972	4110.86	-2.20323	3819	3915.1	-1.55502	0	4057	4057.04	-0.000567282	3779	3888.13	-1.77527	4211	4097.11	1.75502	3779	3807.05	-0.456275
907	0	4053	4052.23	0.0121221	3671	3791.19	-1.98374	4056	4081.42	-0.399109	3832	3821.14	0.175461	0	4109	4049.93	0.921535	3890	3860.29	0.476418	4065	4067.43	-0.0381811	3822	3871.7	-0.803896	0	4095	4014.4	1.25955	3810	3845.66	-0.57772	4061	4054.24	0.106045	3754	3764.83	-0.176704
908	0	4050	4009.22	0.640865	3774	3748.74	0.411133	3976	4037.87	-0.981232	3841	3778.02	1.01619	0	3979	4007.13	-0.445972	3814	3817.56	-0.0575903	4085	4024.48	0.946867	3837	3828.8	0.132425	0	3993	3972.22	0.328922	3888	3803.66	1.35255	4106	4011.83	1.46966	3673	3723.09	-0.826461
909	0	4043	3966.67	1.20044	3757	3706.78	0.819269	3926	3994.8	-1.09808	3780	3735.41	0.725306	0	3945	3964.8	-0.315206	3770	3775.31	-0.0865541	3938	3981.99	-0.701063	3724	3786.39	-1.02231	0	3891	3930.48	-0.632936	3701	3762.14	-1.00496	4031	3969.86	0.962932	3754	3681.83	1.17795
910	0	3880	3924.59	-0.715831	3605	3665.31	-1.00445	3957	3952.21	0.0761903	3689	3693.29	-0.070653	0	3939	3922.92	0.25619	3840	3733.55	1.71777	3901	3939.97	-0.623876	3660	3744.46	-1.39608	0	3941	3889.19	0.825283	3707	3721.08	-0.231216	3895	3928.34	-0.534293	3708	3641.04	1.09966
911	0	3797	3882.96	-1.39508	3604	3624.31	-0.338374	3967	3910.08	0.903757	3702	3651.67	0.82723	0	3885	3881.5	0.056196	3593	3692.27	-1.65608	3831	3898.39	-1.08881	3613	3703.01	-1.49752	0	3812	3848.34	-0.588589	3736	3680.48	0.908379	3797	3887.27	-1.46492	3465	3600.72	-2.30557
912	0	3812	3841.79	-0.48254	3626	3583.79	0.700944	3923	3868.41	0.871579	3568	3610.53	-0.712013	0	3872	3840.52	0.505895	3602	3651.45	-0.82399	3794	3857.27	-1.02714	3572	3662.04	-1.50654	0	3784	3807.93	-0.388931	3734	3640.33	1.53286	3826	3846.63	-0.33349	3465	3560.85	-1.62839
913	0	3757	3801.07	-0.718959	3516	3543.74	-0.467778	3795	3827.2	-0.522676	3550	3569.87	-0.333542	0	3807	3799.99	0.113664	3506	3611.1	-1.77504	3746	3816.59	-1.15329	3609	3621.53	-0.208659	0	3670	3767.94	-1.61668	3612	3600.64	0.189077	3786	3806.42	-0.331855	3593	3521.45	1.19369
914	0	3747	3760.79	-0.225221	3540	3504.14	0.602626	3691	3786.44	-1.57092	3634	3529.69	1.73034	0	3755	3759.89	-0.0798064	3574	3571.21	0.0466491	3657	3776.35	-1.97354	3590	3581.49	0.141986	0	3658	3728.38	-1.16365	3529	3561.39	-0.545161	3765	3766.64	-0.0266861	3353	3482.49	-2.2363
915	0	3796	3720.94	1.21824	3443	3465.01	-0.375096	3807	3746.12	0.986611	3504	3489.98	0.236908	0	3795	3720.23	1.21378	3495	3531.77	-0.622033	3726	3736.54	-0.172668	3689	3541.91	2.42179	0	3617	3689.24	-1.20117	3593	3522.57	1.17491	3698	3727.28	-0.481455	3428	3443.98	-0.272975
916	0	3649	3681.53	-0.538523	3456	3426.32	0.504775	3665	3706.25	-0.681425	3391	3450.73	-1.02564	0	3613	3680.99	-1.13116	3398	3492.78	-1.62602	3702	3697.16	0.0794969	3453	3502.77	-0.847044	0	3596	3650.52	-0.909127	3357	3484.2	-2.19533	3669	3688.34	-0.319233	3349	3405.91	-0.98343
917	0	3728	3642.55	1.39956	3285	3388.09	-1.79861	3609	3666.82	-0.962413	3383	3411.93	-0.497431	0	3604	3642.18	-0.635979	3392	3454.24	-1.06865	3627	3658.21	-0.518259	3501	3464.09	0.623852	0	3751	3612.21	2.26618	3403	3446.25	-0.741388	3621	3649.81	-0.478753	3398	3368.28	0.509923
918	0	3602	3603.99	-0.0331003	3407	3350.29	0.971576	3629	3627.81	0.0197124	3351	3373.59	-0.390256	0	3694	3603.79	1.4843	3349	3416.13	-1.16003	3475	3619.68	-2.45433	3363	3425.84	-1.08364	0	3650	3574.3	1.25294	3321	3408.73	-1.52228	3569	3611.69	-0.714582	3200	3331.07	-2.31699
919	1	3505	3565.84	-1.02773	3308	3312.93	-0.0856771	3556	3589.24	-0.557331	3323	3335.7	-0.220252	0	3619	3565.81	0.884205	3305	3378.46	-1.27775	3511	3581.57	-1.19091	3210	3388.03	-3.14229	0	3646	3536.8	1.80842	3321	3371.62	-0.878435	3528	3573.98	-0.774039	3280	3294.29	-0.249455
920	0	3489	3528.12	-0.66223	3330	3276	0.935852	3475	3551.08	-1.29059	3248	3298.24	-0.881595	0	3431	3528.24	-1.66008	3339	3341.21	-0.038262	3520	3543.86	-0.402195	3287	3350.66	-1.11027	0	3427	3499.7	-1.24191	3347	3334.93	0.208557	3503	3536.66	-0.568742	3308	3257.92	0.870655
921	0	3523	3490.8	0.542532	3204	3239.49	-0.626971	3513	3513.34	-0.00573377	3242	3261.23	-0.337655	0	3389	3491.07	-1.75341	3326	3304.39	0.374744	3389	3506.57	-2.01949	3198	3313.7	-2.04598	0	3479	3463	0.271339	3288	3298.66	-0.185835	3413	3499.74	-1.4848	3247	3221.98	0.439156
922	0	3358	3453.88	-1.65465	3208	3203.4	0.0811658	3457	3476.01	-0.323374	3254	3224.64	0.514711	0	3424	3454.31	-0.518009	3223	3267.98	-0.792351	3391	3469.67	-1.35097	3218	3277.17	-1.04308	0	3291	3426.68	-2.36511	3335	3262.78	1.25052	3492	3463.22	0.487078	3180	3186.44	-0.114157
923	0	3380	3417.42	-0.643575	3158	3167.82	-0.17479	3372	3439.19	-1.15704	3230	3188.58	0.728855	0	3432	3417.94	0.23993	3132	3231.99	-1.7867	3286	3433.17	-2.5674	3246	3241.06	0.0867657	0	3379	3390.75	-0.202132	3196	3227.31	-0.553861	3392	3427.08	-0.602294	3116	3151.3	-0.632448
924	1	3307	3381.38	-1.29333	3074	3132.59	-1.05678	3452	3402.7	0.839055	3120	3152.86	-0.588286	0	3373	3381.97	-0.154427	3172	3196.41	-0.433376	3381	3397.07	-0.276356	3108	3205.35	-1.74626	0	3331	3355.2	-0.419336	3203	3192.24	0.190192	3369	3391.32	-0.384585	3095	3116.57	-0.387736
925	0	3309	3345.65	-0.637074	3009	3097.74	-1.61765	3259	3366.58	-1.88454	3093	3117.53	-0.441128	0	3316	3346.38	-0.527594	3099	3161.23	-1.11784	3437	3361.35	1.29031	3198	3170.06	0.494132	0	3382	3320.03	1.06557	3244	3157.55	1.51779	3341	3355.95	-0.25858	3067	3082.23	-0.275064
926	0	3174	3310.31	-2.41944	2979	3063.28	-1.54414	3346	3330.86	0.26173	3008	3082.62	-1.3605	0	3289	3311.18	-0.386697	3057	3126.45	-1.25607	3194	3326.03	-2.33608	3140	3135.16	0.0863533	0	3122	3285.24	-2.92146	3155	3123.26	0.565146	3180	3320.95	-2.49941	3024	3048.29	-0.441639
927	0	3211	3275.35	-1.13559	2970	3029.22	-1.08664	3227	3295.53	-1.20631	3005	3048.11	-0.786344	0	3276	3276.35	-0.00615083	3027	3092.06	-1.18257	3311	3291.07	0.34627	3065	3100.66	-0.644175	0	3242	3250.81	-0.154729	3017	3089.34	-1.31707	3262	3286.32	-0.425736	2837	3014.73	-3.33672
928	0	3192	3240.82	-0.864028	2988	2995.64	-0.139796	3195	3260.67	-1.16183	2943	3014.09	-1.31052	0	3170	3241.9	-1.27706	3040	3058.07	-0.327673	3197	3256.5	-1.05236	3047	3066.56	-0.354303	0	3288	3216.75	1.24257	3022	3055.81	-0.614993	3332	3252.05	1.38501	3037	2981.55	1.00625
929	0	3246	3206.69	0.690007	2922	2962.39	-0.747188	3264	3226.13	0.662783	2941	2980.4	-0.726597	0	3142	3207.82	-1.17429	3047	3024.46	0.408403	3169	3222.3	-0.946848	2962	3032.84	-1.30162	0	3097	3183.05	-1.54628	2981	3022.65	-0.762795	3128	3218.15	-1.61193	2920	2948.74	-0.531952
930	0	3197	3172.85	0.427075	2997	2929.49	1.2332	3118	3191.94	-1.32421	3002	2947.08	1.00238	0	3199	3174.11	0.440047	2934	2991.23	-1.05649	3042	3188.47	-2.65563	2898	2999.51	-1.88556	0	3138	3149.71	-0.209066	3038	2989.86	0.873454	3031	3184.61	-2.7902	2895	2916.32	-0.396177
931	0	3163	3139.38	0.419923	2807	2896.97	-1.69806	3083	3158.12	-1.35298	2906	2914.14	-0.151016	0	3152	3140.76	0.200174	2905	2958.37	-0.990259	3089	3155	-1.18752	2945	2966.55	-0.397101	0	3145	3116.73	0.504169	3017	2957.43	1.08449	3117	3151.43	-0.616661	2863	2884.26	-0.397263
932	0	3155	3106.28	0.867441	2777	2864.82	-1.66641	3162	3124.67	0.663797	2921	2881.58	0.729297	0	3052	3107.77	-1.00953	2848	2925.89	-1.45956	3085	3121.89	-0.664219	2889	2933.97	-0.836637	0	3094	3084.09	0.178151	2869	2925.37	-1.05238	3204	3118.59	1.50882	2740	2852.56	-2.15036
933	0	2994	3073.53	-1.45342	2802	2833.03	-0.586272	3143	3091.59	0.917055	2742	2849.41	-2.05111	0	3013	3075.14	-1.13199	2786	2893.78	-2.04194	3014	3089.14	-1.36868	2934	2901.76	0.595243	0	2933	3051.8	-2.19365	2879	2893.66	-0.273282	3130	3086.11	0.784503	2890	2821.22	1.27934
934	0	2971	3041.13	-1.28668	2937	2801.62	2.49811	3003	3058.86	-1.01939	2730	2817.6	-1.67653	0	3028	3042.85	-0.269886	2856	2862.03	-0.112807	3056	3056.74	-0.0133948	2859	2869.91	-0.20409	0	3057	3019.86	0.671789	2862	2862.31	-0.00581399	3051	3053.97	-0.0537468	2822	2790.24	0.597781
935	0	2940	3009.09	-1.27419	2826	2770.56	1.04288	3019	3026.49	-0.13637	2804	2786.16	0.336915	0	2994	3010.91	-0.309112	2700	2830.64	-2.51414	2927	3024.69	-1.80565	2840	2838.43	0.0294755	0	3130	2988.25	2.53367	2878	2831.31	0.87035	3002	3022.17	-0.368097	2748	2759.62	-0.221588
936	0	3004	2977.39	0.48549	2699	2739.86	-0.786485	2946	2994.48	-0.893127	2706	2755.09	-0.943588	0	3113	2979.32	2.39595	2698	2799.6	-1.95608	2972	2992.98	-0.384881	2725	2807.3	-1.57664	0	2827	2956.98	-2.44463	2763	2800.65	-0.716288	3036	2990.7	0.82206	2773	2729.34	0.829199
937	0	3036	2946.04	1.63274	2739	2709.51	0.563476	2880	2962.81	-1.54304	2683	2724.37	-0.798677	0	3053	2948.07	1.89913	2754	2768.92	-0.284277	2915	2961.62	-0.863407	2716	2776.53	-1.16146	0	2888	2926.04	-0.707884	2724	2770.34	-0.887784	2982	2959.57	0.410675	2759	2699.4	1.13472
938	0	3000	2915.02	1.55152	2749	2679.51	1.32539	2940	2931.48	0.157052	2750	2694.01	1.0677	0	2884	2917.15	-0.617233	2670	2738.58	-1.32724	3008	2930.59	1.41149	2667	2746.11	-1.53178	0	2876	2895.43	-0.362343	2753	2740.36	0.240958	2870	2928.77	-1.09708	2664	2669.8	-0.11236
939	0	2859	2884.34	-0.473884	2765	2649.85	2.18984	2908	2900.5	0.139053	2703	2664	0.750129	0	2921	2886.56	0.637212	2652	2708.59	-1.09882	2866	2899.89	-0.63306	2746	2716.03	0.571977	0	2832	2865.15	-0.622874	2632	2710.71	-1.53427	2808	2898.3	-1.70404	2579	2640.54	-1.21174
940	0	2852	2853.99	-0.03724	2676	2620.53	1.07225	2909	2869.86	0.72577	2674	2634.34	0.766995	0	2846	2856.3	-0.193137	2736	2678.93	1.09104	2784	2869.53	-1.6209	2689	2686.29	0.0522786	0	2880	2835.18	0.835095	2699	2681.4	0.33881	2889	2868.15	0.38799	2529	2611.61	-1.64261
941	0	2856	2823.97	0.599406	2668	2591.55	1.48009	2816	2839.54	-0.44365	2593	2605.02	-0.236021	0	2917	2826.37	1.67803	2626	2649.61	-0.460753	2944	2839.49	1.92624	2685	2656.89	0.542521	0	2683	2805.54	-2.36573	2639	2652.41	-0.261039	2744	2838.31	-1.80043	2543	2583	-0.793256
942	0	2665	2794.27	-2.50407	2635	2562.9	1.40461	2733	2809.56	-1.46446	2600	2576.04	0.469946	0	2722	2796.76	-1.43292	2664	2620.62	0.840435	2806	2809.77	-0.0711152	2663	2627.82	0.681721	0	2695	2776.21	-1.56432	2620	2623.74	-0.0731526	2781	2808.8	-0.527071	2518	2554.72	-0.731833
943	0	2664	2764.89	-1.95474	2561	2534.57	0.522178	2659	2779.9	-2.34462	2631	2547.39	1.63003	0	2857	2767.47	1.67506	2527	2591.96	-1.29224	2801	2780.37	0.389826	2547	2599.08	-1.03198	0	2852	2747.19	1.96258	2611	2595.4	0.305341	2806	2779.59	0.498567	2475	2526.76	-1.04049
944	0	2707	2735.83	-0.554145	2442	2506.57	-1.30674	2730	2750.57	-0.393611	2558	2519.07	0.769629	0	2769	2738.49	0.57985	2599	2563.62	0.693961	2738	2751.28	-0.253897	2593	2570.67	0.438548	0	2762	2718.48	0.828108	2560	2567.37	-0.145588	2721	2750.69	-0.569254	2511	2499.12	0.237057
945	0	2770	2707.09	1.1954	2443	2478.89	-0.726217	2636	2721.55	-1.66626	2525	2491.09	0.67493	0	2698	2709.82	-0.227552	2503	2535.6	-0.65167	2787	2722.51	1.22151	2583	2542.58	0.795367	0	2747	2690.07	1.08615	2629	2539.65	1.74268	2719	2722.1	-0.0595228	2495	2471.79	0.464645
946	0	2702	2678.65	0.449235	2453	2451.53	0.0296699	2740	2692.85	0.900804	2427	2463.42	-0.739237	0	2708	2681.46	0.510022	2444	2507.9	-1.29258	2766	2694.05	1.36803	2561	2514.8	0.912861	0	2686	2661.97	0.463699	2471	2512.24	-0.829518	2727	2693.82	0.635468	2522	2444.77	1.53785
947	0	2756	2650.52	2.00927	2401	2424.48	-0.479173	2600	2664.46	-1.26411	2439	2436.07	0.0593219	0	2713	2653.4	1.14419	2492	2480.51	0.230154	2647	2665.89	-0.367248	2581	2487.34	1.8435	0	2645	2634.16	0.210742	2462	2485.13	-0.46611	2763	2665.83	1.84866	2440	2418.05	0.44427
948	0	2698	2622.69	1.44985	2323	2397.74	-1.55064	2668	2636.38	0.612272	2413	2409.04	0.080674	0	2518	2625.65	-2.14526	2476	2453.43	0.453584	2682	2638.04	0.848863	2471	2460.2	0.217363	0	2655	2606.65	0.938346	2529	2458.32	1.40544	2645	2638.13	0.133502	2370	2391.64	-0.444534
949	0	2625	2595.16	0.582324	2403	2371.3	0.646674	2658	2608.6	0.958245	2394	2382.32	0.238804	0	2521	2598.19	-1.53737	2433	2426.65	0.12865	2607	2610.48	-0.0681994	2388	2433.35	-0.928088	0	2582	2579.43	0.0505642	2402	2431.81	-0.608312	2566	2610.73	-0.883097	2451	2365.53	1.72649
950	0	2586	2567.93	0.355245	2362	2345.16	0.346411	2495	2581.12	-1.72413	2266	2355.9	-1.88858	0	2494	2571.03	-1.54241	2374	2400.18	-0.537319	2594	2583.22	0.211644	2442	2406.81	0.712019	0	2581	2552.5	0.560994	2325	2405.6	-1.67156	2622	2583.62	0.74946	2356	2339.71	0.3357
951	0	2542	2541	0.0198777	2251	2319.33	-1.44014	2504	2553.94	-0.998035	2355	2329.79	0.519464	0	2519	2544.16	-0.501214	2383	2374.01	0.184271	2621	2556.25	1.26473	2436	2380.58	1.12295	0	2549	2525.86	0.458434	2362	2379.68	-0.363721	2612	2556.8	1.08007	2347	2314.18	0.677519
952	0	2544	2514.35	0.587823	2343	2293.78	1.01676	2509	2527.06	-0.360504	2305	2303.98	0.0212153	0	2508	2517.57	-0.191135	2351	2348.12	0.0593193	2438	2529.57	-1.85455	2305	2354.63	-1.0338	0	2459	2499.49	-0.816567	2347	2354.04	-0.145363	2586	2530.26	1.09612	2266	2288.94	-0.481834
953	0	2458	2487.99	-0.604932	2208	2268.53	-1.28821	2469	2500.47	-0.633235	2241	2278.47	-0.791485	0	2552	2491.27	1.2021	2376	2322.53	1.09686	2590	2503.18	1.70605	2377	2328.98	0.984855	0	2424	2473.41	-1.00355	2277	2328.69	-1.08327	2484	2504	-0.401276	2260	2263.98	-0.0837349
954	0	2366	2461.92	-1.97189	2209	2243.57	-0.735497	2509	2474.16	0.695551	2182	2253.25	-1.52527	0	2368	2465.26	-1.99859	2294	2297.23	-0.067504	2471	2477.06	-0.121974	2330	2303.62	0.54643	0	2405	2447.6	-0.868721	2367	2303.62	1.30268	2461	2478.02	-0.343028	2180	2239.31	-1.2702
955	0	2411	2436.12	-0.511601	2244	2218.89	0.530095	2374	2448.14	-1.52164	2261	2228.32	0.687317	0	2377	2439.52	-1.28228	2221	2272.22	-1.08677	2367	2451.23	-1.73129	2267	2278.55	-0.242582	0	2458	2422.07	0.724707	2267	2278.83	-0.248489	2487	2452.31	0.695629	2191	2214.91	-0.510817
956	0	2427	2410.6	0.33284	2122	2194.49	-1.57365	2496	2422.4	1.47314	2163	2203.67	-0.874565	0	2432	2414.05	0.363909	2261	2247.48	0.284297	2427	2425.67	0.0269144	2167	2253.76	-1.86375	0	2453	2396.81	1.13455	2353	2254.32	2.03441	2445	2426.87	0.366599	2145	2190.79	-0.988673
957	0	2403	2385.36	0.359858	2163	2170.37	-0.158464	2387	2396.94	-0.203495	2156	2179.31	-0.502086	0	2467	2388.86	1.57315	2206	2223.03	-0.362478	2464	2400.39	1.28144	2238	2229.25	0.184996	0	2331	2371.81	-0.845357	2192	2230.07	-0.813147	2429	2401.7	0.553819	2241	2166.94	1.56445
958	0	2383	2360.39	0.463205	2134	2146.52	-0.271103	2308	2371.76	-1.32714	2112	2155.23	-0.940714	0	2229	2363.94	-2.8582	2117	2198.84	-1.77878	2363	2375.38	-0.254649	2193	2205.01	-0.256536	0	2262	2347.09	-1.78898	2172	2206.09	-0.731578	2348	2376.8	-0.594418	2210	2143.36	1.41755
959	0	2290	2335.68	-0.954677	2156	2122.95	0.711809	2306	2346.85	-0.850593	2108	2131.43	-0.510243	0	2352	2339.29	0.262115	2236	2174.93	1.29143	2360	2350.63	0.19281	2190	2181.05	0.191212	0	2263	2322.62	-1.25324	2183	2182.39	0.0131678	2413	2352.16	1.23846	2085	2120.05	-0.767483
960	0	2276	2311.25	-0.738827	2056	2099.64	-0.96248	2326	2322.2	0.0787114	2077	2107.89	-0.677896	0	2258	2314.9	-1.19738	2197	2151.29	0.975168	2277	2326.15	-1.03007	2173	2157.36	0.335509	0	2278	2298.41	-0.427631	2131	2158.94	-0.605196	2330	2327.78	0.0458844	2103	2096.99	0.131008
961	0	2244	2287.07	-0.909261	2078	2076.6	0.030715	2362	2297.83	1.32041	2117	2084.63	0.703489	0	2244	2290.77	-0.987275	2185	2127.92	1.2212	2293	2301.93	-0.186573	2102	2133.93	-0.696554	0	2355	2274.46	1.65967	2148	2135.75	0.264319	2330	2303.66	0.545606	2093	2074.2	0.410952
962	0	2336	2263.16	1.50712	2007	2053.82	-1.0451	2221	2273.72	-1.11857	2066	2061.64	0.0960164	0	2300	2266.9	0.690251	2116	2104.8	0.243408	2238	2277.97	-0.84498	2082	2110.77	-0.630618	0	2276	2250.76	0.529027	2082	2112.82	-0.675423	2309	2279.8	0.607745	2045	2051.66	-0.147326
963	0	2134	2239.5	-2.28377	2015	2031.3	-0.363094	2173	2249.86	-1.64888	2016	2038.9	-0.510095	0	2224	2243.28	-0.408833	2070	2081.95	-0.262647	2312	2254.27	1.20063	2036	2087.87	-1.14964	0	2219	2227.32	-0.176515	2085	2090.14	-0.112607	2250	2256.18	-0.130315	2090	2029.38	1.32602
964	0	2319	2216.09	2.13691	2034	2009.03	0.553581	2172	2226.27	-1.16445	1939	2016.43	-1.75843	0	2269	2219.92	1.03043	2033	2059.35	-0.584459	2183	2230.82	-1.02347	2026	2065.23	-0.871595	0	2158	2204.12	-0.992738	1997	2067.72	-1.58244	2209	2232.82	-0.506711	2012	2007.35	0.103749
965	0	2189	2192.94	-0.0842628	1926	1987.02	-1.39044	2223	2202.93	0.425692	1958	1994.22	-0.818444	0	2204	2196.8	0.153317	2022	2037.01	-0.333784	2243	2207.62	0.747067	2027	2042.84	-0.35191	0	2125	2181.16	-1.21838	2074	2045.54	0.624976	2106	2209.7	-2.25961	1958	1985.56	-0.622864
966	0	2199	2170.04	0.617605	1906	1965.26	-1.35734	2125	2179.84	-1.18968	1926	1972.25	-1.05396	0	2100	2173.93	-1.61339	2021	2014.92	0.135325	2208	2184.67	0.496585	1977	2020.71	-0.983001	0	2065	2158.45	-2.05657	1988	2023.61	-0.798554	2061	2186.82	-2.77149	1913	1964.02	-1.16652
967	0	2120	2147.38	-0.594653	1873	1943.74	-1.6346	2072	2157	-1.86741	1941	1950.54	-0.216637	0	2176	2151.31	0.529239	1982	1993.07	-0.248691	2101	2161.96	-1.3299	1974	1998.82	-0.558648	0	2181	2135.99	0.963855	2055	2001.91	1.17102	2141	2164.19	-0.501098	1868	1942.72	-1.72887
968	0	2146	2124.97	0.454084	1934	1922.47	0.262159	2062	2134.41	-1.59463	1900	1929.08	-0.667196	0	2058	2128.93	-1.56355	1978	1971.47	0.146787	2139	2139.49	-0.0106526	1928	1977.18	-1.12003	0	2092	2113.76	-0.475664	1999	1980.46	0.414562	2144	2141.79	0.0477121	1859	1921.66	-1.45336
969	0	2094	2102.79	-0.192078	1783	1901.44	-2.80495	2161	2112.06	1.05272	1888	1907.87	-0.4572	0	2156	2106.79	1.05984	1969	1950.11	0.425618	2054	2117.27	-1.39597	1892	1955.78	-1.46634	0	2118	2091.76	0.570144	1913	1959.25	-1.05748	2178	2119.63	1.25069	1825	1900.84	-1.77529
970	0	2050	2080.85	-0.681419	1907	1880.65	0.603439	2024	2089.95	-1.46604	1948	1886.89	1.38455	0	1985	2084.88	-2.24187	1887	1928.99	-0.966753	2089	2095.28	-0.13737	1950	1934.62	0.348203	0	2108	2070	0.827685	2002	1938.27	1.42427	2076	2097.7	-0.476379	1817	1880.25	-1.48385
971	0	2042	2059.15	-0.379541	1835	1860.09	-0.585752	1977	2068.09	-2.04856	1812	1866.16	-1.27225	0	2054	2063.21	-0.203232	1834	1908.11	-1.7306	2034	2073.52	-0.876375	1892	1913.7	-0.498967	0	2026	2048.47	-0.499134	1869	1917.53	-1.12246	2035	2076.01	-0.909108	1890	1859.89	0.692536
972	0	2021	2037.68	-0.37107	1754	1839.77	-2.04791	2105	2046.45	1.27609	1828	1845.66	-0.413011	0	2022	2041.77	-0.439654	1856	1887.46	-0.730374	2032	2052	-0.443727	1896	1893.02	0.0684712	0	2018	2027.16	-0.203963	1769	1897.01	-3.04351	1925	2054.55	-2.9526	1850	1839.76	0.238015
973	0	1998	2016.44	-0.412593	1802	1819.67	-0.416365	2003	2025.05	-0.492739	1753	1825.39	-1.72906	0	2009	2020.56	-0.257859	1839	1867.05	-0.654067	2019	2030.71	-0.260594	1859	1872.57	-0.314625	0	1958	2006.08	-1.08666	1814	1876.72	-1.47254	2006	2033.31	-0.60964	1775	1819.86	-1.06474
974	0	1981	1995.43	-0.324229	1770	1799.81	-0.708527	1992	2003.88	-0.266238	1802	1805.36	-0.079166	0	1923	1999.57	-1.74614	1757	1846.86	-2.14379	1922	2009.64	-1.99914	1825	1852.34	-0.640026	0	1873	1985.23	-2.59318	1791	1856.65	-1.55127	1945	2012.29	-1.52575	1786	1800.18	-0.335454
975	0	2000	1974.64	0.566968	1793	1780.17	0.303052	1974	1982.94	-0.201235	1773	1785.56	-0.298179	0	1900	1978.81	-1.80802	1799	1826.9	-0.657744	1879	1988.8	-2.53307	1841	1832.35	0.201714	0	1819	1964.59	-3.4137	1861	1836.8	0.56087	2040	1991.49	1.07394	1740	1780.72	-0.976081
976	0	1857	1954.08	-2.25282	1754	1760.75	-0.16114	1986	1962.22	0.53351	1803	1765.98	0.871933	0	1952	1958.27	-0.141899	1704	1807.16	-2.49903	2020	1968.18	1.15293	1738	1812.57	-1.78877	0	1943	1944.18	-0.0267018	1832	1817.18	0.346299	1931	1970.92	-0.908417	1682	1761.47	-1.93778
977	0	1912	1933.74	-0.497109	1699	1741.55	-1.03227	1927	1941.73	-0.335575	1772	1746.62	0.602923	0	1943	1937.95	0.114622	1800	1787.64	0.291316	1916	1947.78	-0.726086	1788	1793.02	-0.118754	0	1934	1923.98	0.227923	1734	1797.77	-1.53136	1884	1950.56	-1.53346	1730	1742.44	-0.299203
978	0	1860	1913.61	-1.24307	1663	1722.57	-1.46069	1893	1921.46	-0.654075	1722	1727.48	-0.132151	0	1876	1917.84	-0.966051	1731	1768.34	-0.897493	1835	1927.6	-2.16168	1723	1773.69	-1.22117	0	1858	1903.99	-1.06693	1777	1778.57	-0.0372832	1807	1930.41	-2.90329	1672	1723.63	-1.26266
979	0	1851	1893.7	-0.992491	1747	1703.8	1.03359	1907	1901.4	0.128169	1698	1708.57	-0.256409	0	1900	1897.95	0.0469921	1705	1749.26	-1.07179	1899	1907.63	-0.19808	1737	1754.57	-0.421673	0	1836	1884.21	-1.12522	1734	1759.59	-0.614468	1913	1910.48	0.0575467	1585	1705.03	-3.01481
980	0	1836	1874	-0.886901	1667	1685.24	-0.446826	1877	1881.56	-0.105333	1664	1689.86	-0.634014	0	1884	1878.27	0.131953	1688	1730.38	-1.03164	1811	1887.88	-1.80648	1671	1735.67	-1.5821	0	1826	1864.65	-0.904435	1778	1740.81	0.881935	1822	1890.76	-1.61089	1649	1686.63	-0.926659
981	0	1812	1854.52	-0.998776	1714	1666.9	1.13773	1832	1861.94	-0.699444	1658	1671.37	-0.328414	0	1900	1858.8	0.945119	1623	1711.72	-2.20234	1793	1868.33	-1.77903	1652	1716.98	-1.5988	0	1819	1845.29	-0.616389	1770	1722.24	1.13512	1860	1871.25	-0.260751	1715	1668.44	1.12432
982	0	1843	1835.24	0.180833	1594	1648.76	-1.37153	1786	1842.52	-1.33745	1636	1653.09	-0.422583	0	1768	1839.54	-1.70144	1604	1693.27	-2.22903	1817	1848.99	-0.750562	1649	1698.5	-1.21903	0	1807	1826.13	-0.450125	1657	1703.88	-1.15167	1810	1851.94	-0.985707	1641	1650.45	-0.233324
983	0	1731	1816.16	-2.04696	1587	1630.82	-1.10008	1771	1823.32	-1.24315	1572	1635.02	-1.58947	0	1737	1820.48	-2.00311	1590	1675.03	-2.13234	1811	1829.86	-0.443228	1649	1680.23	-0.76902	0	1778	1807.18	-0.692078	1591	1685.72	-2.37466	1843	1832.83	0.2369	1619	1632.66	-0.339625
984	0	1763	1797.3	-0.816795	1592	1613.09	-0.528621	1743	1804.32	-1.46866	1537	1617.15	-2.04448	0	1917	1801.63	2.63501	1598	1656.98	-1.47553	1844	1810.93	0.770028	1633	1662.16	-0.721564	0	1773	1788.43	-0.366463	1668	1667.76	0.00593596	1768	1813.92	-1.0922	1600	1615.08	-0.376941
985	0	1743	1778.63	-0.853394	1588	1595.56	-0.189711	1776	1785.52	-0.22588	1590	1599.49	-0.237961	0	1737	1782.98	-1.10315	1601	1639.14	-0.953288	1679	1792.21	-2.76278	1646	1644.29	0.0421234	0	1755	1769.88	-0.355126	1638	1649.99	-0.296346	1734	1795.22	-1.47013	1572	1597.69	-0.647851
986	0	1693	1760.16	-1.63226	1548	1578.23	-0.768226	1714	1766.92	-1.27835	1588	1582.03	0.149944	0	1714	1764.52	-1.2203	1580	1621.5	-1.04408	1688	1773.68	-2.08538	1540	1626.62	-2.20736	0	1712	1751.52	-0.95513	1600	1632.43	-0.810644	1719	1776.71	-1.39188	1574	1580.49	-0.16356
987	0	1715	1741.89	-0.649332	1519	1561.09	-1.07985	1658	1748.53	-2.2233	1606	1564.76	1.02909	0	1823	1746.26	1.79728	1584	1604.06	-0.503927	1708	1755.35	-1.14564	1553	1609.15	-1.4249	0	1606	1733.36	-3.17796	1542	1615.05	-1.8603	1680	1758.39	-1.91261	1550	1563.48	-0.342485
988	0	1727	1723.82	0.076634	1523	1544.14	-0.541714	1659	1730.33	-1.7513	1504	1547.69	-1.12655	0	1674	1728.2	-1.32465	1579	1586.81	-0.196423	1683	1737.21	-1.32142	1643	1591.88	1.26124	0	1658	1715.38	-1.40932	1530	1597.87	-1.73506	1658	1740.27	-2.02049	1548	1546.67	0.0338586
989	0	1657	1705.93	-1.2021	1495	1527.39	-0.837593	1715	1712.33	0.064489	1540	1530.81	0.23411	0	1672	1710.33	-0.937267	1561	1569.75	-0.221376	1736	1719.27	0.401617	1487	1574.79	-2.27672	0	1636	1697.6	-1.52306	1565	1580.87	-0.40123	1634	1722.34	-2.18539	1501	1530.04	-0.749548
990	0	1691	1688.24	0.0670853	1524	1510.82	0.33763	1668	1694.52	-0.649339	1521	1514.13	0.17621	0	1695	1692.64	0.0572631	1565	1552.88	0.306425	1608	1701.51	-2.332	1598	1557.9	1.00307	0	1644	1680.01	-0.888127	1535	1564.07	-0.741845	1685	1704.6	-0.477388	1483	1513.6	-0.794515
991	0	1636	1670.74	-0.858855	1510	1494.44	0.400433	1663	1676.9	-0.340885	1464	1497.63	-0.878976	0	1634	1675.15	-1.01793	1522	1536.2	-0.36391	1646	1683.95	-0.935347	1521	1541.2	-0.517916	0	1631	1662.6	-0.782519	1560	1547.44	0.317955	1622	1687.04	-1.61492	1476	1497.34	-0.555378
992	0	1600	1653.42	-1.33556	1461	1478.24	-0.451142	1636	1659.47	-0.580294	1449	1481.32	-0.849117	0	1577	1657.84	-2.03565	1561	1519.7	1.04526	1691	1666.57	0.594111	1504	1524.68	-0.533284	0	1594	1645.38	-1.28688	1534	1531	0.076559	1665	1669.67	-0.114378	1407	1481.26	-1.97969
993	0	1660	1636.29	0.581917	1445	1462.23	-0.453283	1670	1642.23	0.679583	1464	1465.2	-0.0312942	0	1626	1640.71	-0.364891	1485	1503.39	-0.477239	1560	1649.38	-2.26283	1472	1508.35	-0.947395	0	1606	1628.34	-0.557373	1468	1514.74	-1.21995	1562	1652.48	-2.28928	1451	1465.36	-0.376943
994	0	1536	1619.34	-2.12651	1373	1446.4	-1.98082	1543	1625.17	-2.09184	1443	1449.26	-0.164662	0	1596	1623.77	-0.695135	1456	1487.26	-0.819257	1651	1632.36	0.458674	1435	1492.2	-1.50991	0	1541	1611.47	-1.79528	1425	1498.66	-1.95131	1638	1635.47	0.062552	1445	1449.64	-0.121954
995	0	1594	1602.57	-0.214749	1466	1430.74	0.920855	1572	1608.29	-0.915397	1394	1433.49	-1.05776	0	1537	1607.01	-1.78569	1460	1471.31	-0.296004	1614	1615.53	-0.0381149	1538	1476.23	1.57516	0	1538	1594.79	-1.4481	1495	1482.76	0.316671	1532	1618.64	-2.2135	1382	1434.09	-1.40115
996	0	1586	1585.98	0.000395411	1419	1415.26	0.0992192	1537	1591.6	-1.39267	1445	1417.91	0.712673	1	1521	1590.42	-1.78005	1471	1455.54	0.403163	1610	1598.88	0.277181	1426	1460.43	-0.911835	0	1546	1578.28	-0.821051	1434	1467.03	-0.872127	1573	1601.98	-0.730799	1402	1418.71	-0.446365
997	0	1528	1569.57	-1.06349	1399	1399.96	-0.0255836	1508	1575.08	-1.72746	1313	1402.5	-2.47	0	1542	1574.01	-0.815227	1497	1439.94	1.47477	1548	1582.4	-0.874363	1460	1444.82	0.397389	0	1554	1561.95	-0.201656	1430	1451.47	-0.567723	1617	1585.51	0.783213	1356	1403.51	-1.29018
998	0	1474	1553.33	-2.06637	1409	1384.82	0.644084	1511	1558.74	-1.22821	1317	1387.27	-1.93625	0	1548	1557.78	-0.248505	1446	1424.52	0.565	1629	1566.1	1.55845	1385	1429.37	-1.1923	0	1500	1545.79	-1.18225	1410	1436.08	-0.694595	1537	1569.2	-0.821328	1373	1388.47	-0.417626
999	0	1506	1537.27	-0.805731	1422	1369.86	1.3827	1550	1542.58	0.188531	1320	1372.21	-1.43692	0	1494	1541.71	-1.23445	1358	1409.26	-1.39106	1487	1549.97	-1.63297	1398	1414.1	-0.430611	0	1441	1529.8	-2.33922	1376	1420.86	-1.20946	1528	1553.07	-0.641223	1317	1373.61	-1.55983
1000	0	1509	1521.37	-0.318542	1288	1355.06	-1.86865	1496	1526.59	-0.790762	1338	1357.31	-0.528011	0	1475	1525.82	-1.32329	1391	1394.18	-0.0852225	1533	1534.01	-0.0258335	1431	1399	0.845957	0	1455	1513.98	-1.54613	1403	1405.81	-0.0751064	1498	1537.1	-1.01023	1352	1358.9	-0.187772
1001	0	1431	1505.65	-1.97335	1338	1340.43	-0.0665237	1477	1510.76	-0.878542	1277	1342.59	-1.83545	0	1482	1510.14	-0.730895	1330	1379.32	-1.35226	1542	1518.27	0.60435	1406	1384.12	0.583584	0	1491	1498.32	-0.189611	1319	1390.93	-1.98048	1434	1521.3	-2.30543	1317	1344.37	-0.754051
1002	0	1493	1490.09	0.0752779	1382	1325.97	1.50726	1438	1495.11	-1.50607	1341	1328.03	0.354114	0	1462	1494.63	-0.853331	1361	1364.6	-0.0975888	1421	1502.69	-2.16701	1360	1369.39	-0.25451	0	1502	1482.83	0.494588	1369	1376.2	-0.194715	1495	1505.67	-0.275975	1283	1329.99	-1.31178
1003	0	1412	1474.7	-1.66857	1251	1311.66	-1.71514	1478	1479.63	-0.0423065	1265	1313.64	-1.36753	0	1418	1479.23	-1.62614	1364	1350.01	0.378737	1456	1487.23	-0.818445	1362	1354.78	0.195609	0	1446	1467.51	-0.565552	1281	1361.64	-2.25316	1507	1490.2	0.432691	1330	1315.77	0.390239
1004	0	1477	1459.47	0.456118	1258	1297.52	-1.11424	1409	1464.31	-1.4734	1206	1299.41	-2.68973	0	1363	1464	-2.73584	1358	1335.59	0.608227	1399	1471.93	-1.94998	1332	1340.34	-0.228473	0	1449	1452.34	-0.0877741	1369	1347.24	0.588079	1540	1474.9	1.65897	1289	1301.71	-0.353947
1005	0	1406	1444.4	-1.0242	1298	1283.54	0.401498	1469	1449.15	0.517891	1214	1285.34	-2.04739	0	1408	1448.93	-1.09092	1275	1321.32	-1.29723	1449	1456.8	-0.204981	1328	1326.06	0.0533379	0	1576	1437.34	3.49288	1266	1333	-1.88295	1482	1459.75	0.577907	1278	1287.8	-0.274209
1006	0	1366	1429.5	-1.71803	1255	1269.71	-0.415131	1436	1434.16	0.0486579	1208	1271.42	-1.82481	0	1477	1434.03	1.11821	1280	1307.21	-0.760603	1466	1441.83	0.63126	1283	1311.93	-0.807745	0	1466	1422.49	1.13637	1291	1318.91	-0.776741	1388	1444.77	-1.52369	1270	1274.05	-0.113705
1007	0	1383	1414.75	-0.853737	1240	1256.03	-0.455298	1468	1419.32	1.27049	1199	1257.67	-1.69429	0	1333	1419.27	-2.36299	1261	1293.26	-0.90848	1418	1427.02	-0.239422	1269	1297.97	-0.813114	0	1397	1407.8	-0.288966	1317	1304.97	0.331361	1357	1429.94	-1.97998	1207	1260.45	-1.53859
1008	0	1275	1400.16	-3.50512	1245	1242.51	0.0705135	1433	1404.64	0.749032	1188	1244.07	-1.62664	0	1413	1404.68	0.22139	1309	1279.46	0.816371	1421	1412.36	0.229253	1292	1284.15	0.21829	0	1341	1393.27	-1.42726	1360	1291.19	1.86579	1442	1415.26	0.704072	1220	1247.01	-0.773182
1009	0	1380	1385.72	-0.154016	1294	1229.14	1.80299	1326	1390.13	-1.761	1256	1230.62	0.716204	0	1287	1390.24	-2.8777	1281	1265.82	0.424143	1386	1397.86	-0.318437	1267	1270.49	-0.0981845	0	1369	1378.88	-0.267139	1286	1277.56	0.235288	1391	1400.74	-0.261264	1221	1233.71	-0.363663
1010	0	1363	1371.44	-0.228562	1186	1215.92	-0.868871	1426	1375.76	1.3304	1274	1217.32	1.58797	0	1330	1375.95	-1.25993	1237	1252.33	-0.435768	1300	1383.51	-2.31603	1258	1256.99	0.0285453	0	1373	1364.65	0.225234	1194	1264.08	-2.02814	1406	1386.38	0.523338	1220	1220.56	-0.0159121
1011	0	1293	1357.31	-1.78837	1164	1202.85	-1.13872	1327	1361.55	-0.948417	1166	1204.17	-1.1179	0	1368	1361.81	0.167317	1244	1238.98	0.142254	1392	1369.31	0.608223	1317	1243.63	2.02175	0	1372	1350.57	0.578442	1197	1250.75	-1.55347	1350	1372.16	-0.60311	1198	1207.55	-0.275909
1012	0	1365	1343.33	0.586666	1186	1189.92	-0.113945	1369	1347.49	0.581391	1140	1191.17	-1.5156	0	1372	1347.82	0.652695	1237	1225.79	0.318825	1405	1355.26	1.32701	1291	1230.42	1.68603	0	1332	1336.64	-0.127202	1241	1237.56	0.0977038	1326	1358.09	-0.881297	1198	1194.69	0.0956999
1013	0	1288	1329.49	-1.15612	1099	1177.14	-2.35716	1292	1333.58	-1.15672	1171	1178.32	-0.213863	0	1317	1333.98	-0.468005	1227	1212.74	0.407194	1330	1341.36	-0.311482	1161	1217.36	-1.65397	0	1276	1322.86	-1.31176	1134	1224.51	-2.68787	1307	1344.17	-1.02818	1146	1181.97	-1.06248
1014	0	1311	1315.81	-0.132715	1103	1164.5	-1.85187	1353	1319.82	0.902171	1224	1165.61	1.66901	0	1288	1320.29	-0.899744	1215	1199.83	0.435185	1343	1327.61	0.42005	1254	1204.44	1.39959	0	1333	1309.22	0.651374	1227	1211.61	0.439304	1353	1330.4	0.614507	1143	1169.39	-0.780535
1015	0	1353	1302.26	1.37933	1116	1152.01	-1.07779	1322	1306.2	0.434573	1164	1153.04	0.32121	0	1265	1306.74	-1.17362	1212	1187.07	0.716164	1335	1314	0.574793	1210	1191.66	0.527184	0	1310	1295.72	0.394478	1182	1198.85	-0.490135	1312	1316.77	-0.131579	1182	1156.95	0.728668
1016	1	1341	1288.87	1.42366	1104	1139.65	-1.07284	1334	1292.73	1.13	1097	1140.62	-1.31683	0	1367	1293.34	1.99237	1224	1174.45	1.41642	1290	1300.53	-0.293292	1174	1179.03	-0.146725	0	1343	1282.37	1.65447	1200	1186.23	0.397524	1337	1303.28	0.922239	1170	1144.65	0.741245
1017	0	1258	1275.61	-0.496506	1198	1127.43	2.03899	1264	1279.4	-0.433166	1149	1128.33	0.609856	0	1324	1280.07	1.20724	1152	1161.96	-0.293542	1331	1287.21	1.20024	1140	1166.53	-0.785824	0	1285	1269.16	0.442004	1207	1173.75	0.957184	1251	1289.93	-1.10072	1104	1132.48	-0.857106
1018	0	1247	1262.49	-0.438785	1029	1115.34	-2.69162	1344	1266.21	2.12178	1091	1116.18	-0.762284	0	1243	1266.95	-0.67927	1166	1149.62	0.479741	1196	1274.03	-2.25629	1167	1154.18	0.375401	0	1259	1256.08	0.0822543	1198	1161.4	1.05749	1336	1276.72	1.62169	1126	1120.45	0.165513
1019	0	1238	1249.52	-0.327362	1167	1103.39	1.86198	1276	1253.17	0.639167	1114	1104.16	0.294662	0	1269	1253.96	0.422111	1126	1137.41	-0.340027	1277	1260.99	0.448104	1127	1141.96	-0.445497	0	1188	1243.14	-1.59992	1164	1149.18	0.434227	1243	1263.66	-0.585893	1087	1108.55	-0.653514
1020	0	1229	1236.72	-0.220347	1190	1091.67	2.85054	1210	1240.35	-0.87263	1076	1092.38	-0.499521	0	1267	1241.12	0.72721	1133	1125.34	0.227679	1264	1248.08	0.447745	1127	1129.87	-0.085509	0	1207	1230.35	-0.671958	1111	1137.11	-0.783207	1301	1250.72	1.39385	1134	1096.78	1.10535
1021	0	1262	1224.1	1.06692	1033	1080.01	-1.4627	1192	1227.61	-1.03154	1087	1080.66	0.19219	0	1238	1228.4	0.272779	1091	1113.4	-0.678041	1260	1235.31	0.695505	1139	1117.92	0.624645	0	1196	1217.68	-0.626888	1131	1125.16	0.173717	1258	1237.93	0.565908	1063	1085.14	-0.679031
1022	0	1219	1211.53	0.214015	1093	1068.45	0.74242	1173	1214.98	-1.22569	1121	1069.05	1.55167	0	1307	1215.82	2.52199	1127	1101.59	0.756992	1274	1222.68	1.43789	1098	1106.1	-0.24442	0	1187	1205.15	-0.52674	1086	1113.34	-0.829635	1192	1225.27	-0.963516	1106	1073.63	0.973385
1023	0	1216	1199.09	0.484901	1034	1057.03	-0.716124	1213	1202.48	0.302139	1087	1057.56	0.892888	0	1228	1203.38	0.702628	1100	1089.91	0.304264	1322	1210.17	3.07555	1123	1094.41	0.853154	0	1244	1192.75	1.45313	1117	1101.65	0.45924	1265	1212.74	1.46947	1093	1062.24	0.930267
1024	0	1177	1186.79	-0.285227	1003	1045.73	-1.34913	1202	1190.11	0.343002	1026	1046.2	-0.630766	0	1248	1191.06	1.6117	1101	1078.36	0.682345	1218	1197.81	0.578654	1144	1082.85	1.80795	0	1203	1180.48	0.649342	1100	1090.09	0.298795	1196	1200.34	-0.125394	1080	1050.99	0.882843
1025	0	1239	1174.61	1.82929	1050	1034.55	0.47672	1194	1177.87	0.46678	992	1034.97	-1.36441	0	1201	1178.88	0.638326	1049	1066.94	-0.553797	1179	1185.57	-0.191194	1063	1071.42	-0.25815	0	1139	1168.34	-0.869284	1083	1078.65	0.132045	1225	1188.07	1.05522	1094	1039.85	1.63708
1026	0	1084	1162.56	-2.3862	1002	1023.5	-0.679272	1161	1165.76	-0.139788	1015	1023.87	-0.278362	0	1117	1166.82	-1.49072	1044	1055.64	-0.360249	1196	1173.45	0.651939	1102	1060.11	1.26189	0	1078	1156.33	-2.38556	1127	1067.34	1.77703	1122	1175.93	-1.60991	1016	1028.84	-0.40286
1027	0	1115	1150.64	-1.06747	1066	1012.57	1.63633	1143	1153.78	-0.31897	1060	1012.89	1.44706	0	1200	1154.89	1.30213	1091	1044.47	1.40877	1170	1161.47	0.249374	1075	1048.93	0.7952	0	1163	1144.44	0.544289	1032	1056.16	-0.751936	1182	1163.91	0.526113	974	1017.95	-1.40827
1028	0	1223	1138.85	2.40621	1064	1001.77	1.90784	1127	1141.93	-0.44478	945	1002.03	-1.85514	0	1141	1143.09	-0.0618542	1006	1033.42	-0.864462	1166	1149.61	0.479916	1001	1037.87	-1.1653	0	1170	1132.68	1.09115	1077	1045.09	0.972347	1124	1152.02	-0.835873	1010	1007.18	0.0887262
1029	0	1097	1127.18	-0.911284	1006	991.082	0.470346	1116	1130.2	-0.425218	1047	991.291	1.72167	0	1115	1131.41	-0.491442	1051	1022.49	0.879389	1188	1137.88	1.45414	1010	1026.93	-0.532761	0	1064	1121.04	-1.74865	1014	1034.14	-0.632602	1082	1140.26	-1.77113	1015	996.528	0.579799
1030	0	1162	1115.64	1.36009	983	980.514	0.079284	1117	1118.6	-0.0479566	1027	980.673	1.44559	0	1139	1119.85	0.567312	1075	1011.68	1.93113	1150	1126.27	0.699763	1018	1016.12	0.0590952	0	1173	1109.52	1.85337	987	1023.32	-1.156	1134	1128.62	0.159828	989	985.993	0.0956118
1031	0	1124	1104.21	0.590171	1002	970.064	1.0089	1069	1107.12	-1.16602	988	970.174	0.567124	0	1112	1108.42	0.107381	1030	1001	0.903757	1135	1114.78	0.600113	1032	1005.42	0.827502	0	1103	1098.13	0.146651	1026	1012.61	0.418066	1137	1117.1	0.590223	1033	975.574	1.78673
1032	0	1084	1092.91	-0.270653	918	959.73	-1.37728	1099	1095.77	0.0975608	966	959.792	0.199755	0	1149	1097.11	1.53097	955	990.424	-1.1463	1141	1103.42	1.11267	1006	994.837	0.351965	0	1023	1086.86	-1.99644	1044	1002.02	1.29936	1134	1105.7	0.840429	975	965.269	0.31163
1033	0	1092	1081.73	0.310862	969	949.51	0.626117	1117	1084.53	0.971579	921	949.525	-0.939921	0	1099	1085.91	0.394864	1029	979.97	1.52848	1146	1092.17	1.59019	1020	984.373	1.11553	0	1053	1075.7	-0.699507	968	991.539	-0.756578	1117	1094.42	0.675662	900	955.078	-1.83593
1034	0	1084	1070.66	0.405117	939	939.403	-0.0131619	1044	1073.41	-0.910214	955	939.372	0.5057	0	1078	1074.83	0.0964765	1004	969.63	1.08472	1072	1081.04	-0.276063	994	974.024	0.633599	0	1110	1064.66	1.36087	1012	981.176	0.968951	1061	1083.26	-0.683261	972	944.998	0.86608
1035	0	1076	1059.71	0.496518	925	929.409	-0.144963	1029	1062.41	-1.04149	962	929.333	1.05323	0	1057	1063.87	-0.211355	933	959.404	-0.864412	1054	1070.03	-0.493645	962	963.789	-0.0576797	0	1064	1053.74	0.314616	1021	970.925	1.56714	987	1072.21	-2.71226	943	935.029	0.25956
1036	0	1075	1048.88	0.796664	930	919.525	0.343484	1105	1051.53	1.60869	960	919.405	1.31019	0	1125	1053.03	2.14585	968	949.29	0.601377	1094	1059.13	1.05426	976	953.666	0.714882	0	1071	1042.93	0.857738	1000	960.785	1.24007	1067	1061.28	0.17514	938	925.17	0.418923
1037	0	1066	1038.16	0.852677	922	909.751	0.4034	1023	1040.76	-0.555126	960	909.588	1.62705	0	1059	1042.29	0.513357	922	939.287	-0.569307	1007	1048.35	-1.30296	1010	943.655	2.0876	0	1019	1032.23	-0.414611	930	950.756	-0.680617	1060	1050.46	0.292941	910	915.418	-0.179616
1038	0	1074	1027.55	1.41724	874	900.085	-0.882335	994	1030.1	-1.14502	957	899.88	1.84644	0	1076	1031.67	1.35126	931	929.394	0.0526511	1006	1037.68	-0.998746	943	933.753	0.30111	0	1067	1021.65	1.38824	943	940.836	0.0704855	1021	1039.76	-0.587077	874	905.774	-1.07477
1039	0	979	1017.06	-1.2164	877	890.526	-0.456738	963	1019.56	-1.82253	970	890.279	2.55968	0	1016	1021.17	-0.162139	934	919.609	0.47089	1034	1027.12	0.213947	890	923.961	-1.13836	0	1024	1011.18	0.400558	909	931.023	-0.730445	1039	1029.17	0.305059	840	896.235	-1.9403
1040	0	1012	1006.68	0.167356	897	881.073	0.531799	1063	1009.13	1.6524	881	880.786	0.00722182	0	994	1010.77	-0.531953	897	909.932	-0.431775	1042	1016.67	0.784579	937	914.275	0.742391	0	983	1000.82	-0.568407	948	921.316	0.866651	1037	1018.68	0.568734	947	886.801	1.95621
1041	0	994	996.402	-0.0761745	868	871.724	-0.126397	1009	998.805	0.320961	916	871.397	1.47371	0	1050	1000.48	1.52811	909	900.361	0.286553	1018	1006.34	0.365552	900	904.696	-0.156527	0	994	990.569	0.108826	958	911.715	1.4954	996	1008.31	-0.39016	865	877.47	-0.423992
1042	0	980	986.235	-0.199179	849	862.479	-0.462579	994	988.592	0.171515	814	862.113	-1.68637	0	972	990.304	-0.5871	921	890.894	0.992019	1018	996.108	0.686139	893	895.222	-0.0743416	0	975	980.424	-0.173723	913	902.218	0.356834	1023	998.049	0.78009	874	868.241	0.194794
1043	0	974	976.176	-0.0697224	863	853.335	0.328993	995	978.488	0.523459	889	852.932	1.20968	0	1021	980.231	1.2759	872	881.532	-0.322785	975	985.986	-0.351846	921	885.851	1.1582	0	945	970.386	-0.825822	915	892.824	0.733123	964	987.892	-0.76952	856	859.114	-0.106418
1044	0	981	966.223	0.471806	835	844.293	-0.321599	1037	968.49	2.12746	849	843.853	0.176648	0	978	970.264	0.247369	821	872.272	-1.7894	982	975.971	0.192395	838	876.583	-1.33283	0	975	960.454	0.465851	856	883.531	-0.941005	980	977.841	0.0689569	878	850.086	0.942062
1045	0	973	956.374	0.533008	862	835.351	0.907683	975	958.598	0.52527	780	834.874	-1.96482	0	964	960.402	0.115898	808	863.113	-1.93887	968	966.06	0.0623423	822	867.417	-1.58409	0	891	950.625	-1.99752	891	874.34	0.558136	925	967.895	-1.41038	826	841.157	-0.527366
1046	0	926	946.629	-0.677904	823	826.507	-0.122245	975	948.811	0.83873	803	825.995	-0.811484	0	954	950.643	0.108704	855	854.055	0.0323248	938	956.254	-0.596001	871	858.351	0.428603	0	903	940.9	-1.26123	872	865.248	0.228664	950	958.052	-0.261255	769	832.325	-2.28357
1047	0	892	936.986	-1.50625	826	817.761	0.286676	976	939.126	1.1803	808	817.215	-0.324164	0	867	940.986	-2.51269	834	845.096	-0.384211	940	946.549	-0.213621	803	849.384	-1.63685	0	922	931.277	-0.305511	897	856.254	1.36047	943	948.312	-0.172997	858	823.59	1.17473
1048	0	932	927.445	0.14921	790	809.111	-0.679946	876	929.544	-1.80907	815	808.531	0.226601	0	950	931.43	0.602483	781	836.235	-1.97645	925	936.947	-0.392816	830	840.515	-0.364988	0	877	921.754	-1.51125	829	847.357	-0.637584	996	938.674	1.81645	791	814.951	-0.851597
1049	0	974	918.004	1.79423	792	800.557	-0.30406	915	920.062	-0.167351	797	799.943	-0.104263	0	917	921.975	-0.164286	854	827.47	0.907833	910	927.445	-0.578296	875	831.743	1.46234	0	951	912.332	1.2539	817	838.557	-0.754197	903	929.136	-0.869745	783	806.406	-0.836456
1050	0	934	908.662	0.829083	805	792.097	0.454769	918	910.681	0.241574	769	791.451	-0.809608	0	916	912.619	0.111723	806	818.802	-0.450918	906	918.042	-0.400083	851	823.067	0.957516	0	898	903.008	-0.167127	773	829.852	-2.04484	893	919.697	-0.893382	827	797.954	1.01002
1051	0	898	899.418	-0.0473284	851	783.73	2.30598	939	901.398	1.2271	808	783.053	0.877648	0	911	903.36	0.253111	784	810.228	-0.936711	894	908.738	-0.492916	814	814.486	-0.0170458	0	882	893.782	-0.396732	859	821.242	1.2883	963	910.357	1.69641	785	789.595	-0.163989
1052	0	863	890.272	-0.928338	733	775.456	-1.56814	859	892.213	-1.13322	781	774.747	0.223752	0	884	894.199	-0.343035	834	801.748	1.1168	872	899.531	-0.932324	809	805.999	0.105511	0	850	884.653	-1.1886	792	812.724	-0.736395	811	901.113	-3.16431	820	781.326	1.35054
1053	0	858	881.221	-0.792754	746	767.272	-0.778833	867	883.125	-0.547628	748	766.533	-0.677634	0	854	885.134	-1.06538	803	793.36	0.340174	903	890.42	0.418619	771	797.604	-0.958124	0	897	875.62	0.713864	787	804.298	-0.616621	882	891.966	-0.335587	792	773.148	0.669865
1054	0	848	872.265	-0.833279	800	759.179	1.44324	812	874.132	-2.18041	700	758.41	-2.20769	0	868	876.163	-0.277086	770	785.064	-0.542885	897	881.405	0.520701	803	789.301	0.483426	0	853	866.681	-0.468434	811	795.964	0.527992	927	882.915	1.44795	774	765.059	0.321362
1055	0	836	863.404	-0.947781	773	751.175	0.785007	881	865.234	0.53116	725	750.376	-0.942454	0	863	867.287	-0.145929	780	776.859	0.112461	870	872.484	-0.0842054	777	781.088	-0.146672	0	866	857.836	0.277422	807	787.719	0.678713	848	873.957	-0.891374	726	757.059	-1.1527
1056	0	856	854.635	0.0466523	712	743.258	-1.17145	864	856.43	0.257537	707	742.432	-1.33254	0	855	858.503	-0.119808	781	768.743	0.438582	891	863.656	0.916071	730	772.965	-1.59022	0	892	849.084	1.43694	791	779.564	0.406625	884	865.093	0.635915	769	749.145	0.715978
1057	0	798	845.958	-1.69771	720	735.429	-0.575005	851	847.718	0.112499	793	734.574	2.07476	0	849	849.812	-0.0278493	782	760.716	0.761116	775	854.92	-2.8708	766	764.931	0.0386279	0	853	840.423	0.430631	747	771.496	-0.896272	864	856.321	0.261252	787	741.318	1.62839
1058	0	868	837.373	1.03956	761	727.686	1.20764	863	839.098	0.813631	776	726.804	1.76604	0	829	841.211	-0.424093	695	752.776	-2.19157	821	846.275	-0.882107	795	756.984	1.34829	0	843	831.853	0.383924	710	763.516	-2.00841	860	847.64	0.421472	762	733.576	1.02969
1059	0	822	828.877	-0.239855	720	720.028	-0.00103042	863	830.568	1.10398	702	719.119	-0.646116	0	869	832.7	1.23141	713	744.923	-1.19552	815	837.721	-0.795867	772	749.124	0.823338	0	806	823.373	-0.611929	770	755.622	0.518162	847	839.05	0.27318	699	725.918	-1.01814
1060	0	819	820.47	-0.0513692	700	712.454	-0.4707	812	822.129	-0.355442	727	711.519	0.574164	0	834	824.278	0.336657	714	737.155	-0.866562	774	829.255	-1.98612	724	741.349	-0.644766	0	844	814.981	0.998862	704	747.812	-1.65124	812	830.548	-0.650919	705	718.344	-0.502559
1061	0	801	812.151	-0.394016	695	704.963	-0.377905	802	813.777	-0.415866	658	704.002	-1.79336	0	778	815.944	-1.36035	702	729.472	-1.03687	794	820.879	-0.953886	749	733.659	0.560557	0	772	806.678	-1.24809	752	740.087	0.434405	814	822.136	-0.285151	705	710.852	-0.220394
1062	0	790	803.92	-0.495244	702	697.554	0.167805	771	805.514	-1.24297	680	696.569	-0.635379	0	765	807.697	-1.5437	726	721.873	0.153177	827	812.589	0.501114	732	726.052	0.219833	0	783	798.461	-0.55254	738	732.446	0.204451	771	813.81	-1.54177	726	703.441	0.83723
1063	0	784	795.774	-0.420517	714	690.227	0.889699	760	797.337	-1.35435	631	689.217	-2.31757	0	784	799.536	-0.554855	749	714.356	1.26586	762	804.386	-1.53549	714	718.529	-0.169477	0	718	790.331	-2.69936	690	724.886	-1.32811	779	805.571	-0.95202	711	696.111	0.558364
1064	0	749	787.714	-1.41459	688	682.98	0.191405	784	789.246	-0.187347	632	681.946	-1.98674	0	765	791.46	-0.95668	704	706.921	-0.110095	755	796.269	-1.50192	746	711.087	1.27827	0	765	782.285	-0.624951	685	717.409	-1.23827	791	797.418	-0.228208	708	688.861	0.719282
1065	0	758	779.739	-0.789577	672	675.812	-0.147047	723	781.24	-2.16595	664	674.755	-0.417366	0	751	783.469	-1.18482	718	699.567	0.687911	802	788.236	0.486029	712	703.726	0.310097	0	764	774.324	-0.373508	642	710.011	-2.68419	782	789.35	-0.26283	664	681.69	-0.686491
1066	0	737	771.846	-1.28357	712	668.723	1.62188	766	773.317	-0.264388	645	667.643	-0.891558	0	757	775.561	-0.674626	694	692.293	0.064798	733	780.287	-1.74657	671	696.444	-0.982275	0	756	766.446	-0.379917	696	702.694	-0.253723	764	781.365	-0.628254	614	674.596	-2.44545
1067	0	741	764.036	-0.84626	627	661.711	-1.38624	777	765.478	0.413342	674	660.609	0.515804	0	747	767.736	-0.758694	726	685.098	1.51802	758	772.42	-0.523768	739	689.242	1.83036	0	736	758.65	-0.834907	636	695.455	-2.35753	754	773.464	-0.708823	663	667.579	-0.177847
1068	0	761	756.308	0.170079	664	654.777	0.35793	790	757.721	1.14842	640	653.652	-0.539659	0	734	759.992	-0.959396	664	677.981	-0.542576	777	764.636	0.443559	634	682.119	-1.91104	0	702	750.937	-1.84699	675	688.294	-0.511679	717	765.644	-1.81665	623	660.639	-1.50797
1069	0	696	748.661	-1.9961	634	647.918	-0.552756	714	750.046	-1.34898	662	646.772	0.591847	0	702	752.33	-1.89956	663	670.942	-0.30843	767	756.933	0.363512	644	675.072	-1.22442	0	750	743.303	0.244536	676	681.21	-0.200378	743	757.906	-0.546835	623	653.774	-1.23292
1070	0	698	741.093	-1.63111	621	641.134	-0.807963	716	742.451	-0.988502	642	639.967	0.0802152	0	759	744.746	0.517373	625	663.979	-1.55915	719	749.309	-1.13035	682	668.102	0.532178	0	718	735.75	-0.66241	671	674.202	-0.123615	724	750.248	-0.975485	635	646.983	-0.475532
1071	0	734	733.605	0.0145804	591	634.425	-1.78626	741	734.935	0.222808	653	633.237	0.773367	0	765	737.242	1.00358	667	657.091	0.383671	738	741.766	-0.138615	691	661.208	1.13335	0	706	728.275	-0.838336	681	667.27	0.526146	690	742.669	-2.00508	643	640.266	0.107819
1072	0	709	726.195	-0.645765	645	627.789	0.677694	695	727.498	-1.23271	627	626.581	0.0167213	0	743	729.817	0.483652	661	650.278	0.41702	764	734.3	1.0745	684	654.388	1.13225	0	686	720.879	-1.33168	652	660.412	-0.329432	768	735.169	1.18468	632	633.622	-0.0645103
1073	0	658	718.862	-2.37264	610	621.225	-0.454491	727	720.139	0.25447	627	619.998	0.279631	0	730	722.468	0.278767	664	643.54	0.794017	717	726.913	-0.370195	626	647.642	-0.864989	0	746	713.56	1.18772	642	653.628	-0.458906	678	727.747	-1.91053	590	627.049	-1.5253
1074	0	696	711.606	-0.591533	603	614.733	-0.477811	719	712.857	0.229109	598	613.487	-0.633308	0	692	715.196	-0.881788	611	636.874	-1.04675	706	719.602	-0.511911	633	640.969	-0.316751	0	699	706.317	-0.27676	618	646.916	-1.16318	753	720.402	1.18794	614	620.548	-0.264272
1075	0	696	704.425	-0.319355	604	608.312	-0.175458	718	705.651	0.460874	638	607.047	1.22543	0	696	708	-0.454861	637	630.28	0.26624	686	712.367	-1.0067	610	634.369	-0.98666	0	698	699.15	-0.043536	602	640.277	-1.56006	729	713.133	0.587662	592	614.118	-0.909033
1076	0	722	697.319	0.918512	585	601.961	-0.701261	668	698.52	-1.18086	609	600.678	0.337228	0	721	700.879	0.749353	647	623.758	0.913723	688	705.207	-0.656024	648	627.84	0.791973	0	663	692.058	-1.12853	632	633.709	-0.0679822	693	705.94	-0.491536	616	607.757	0.332134
1077	0	725	690.288	1.28917	586	595.68	-0.399862	732	691.464	1.49825	556	594.378	-1.6276	0	684	693.832	-0.375923	622	617.307	0.188172	688	698.122	-0.385905	628	621.381	0.264118	0	685	685.04	-0.00154381	688	627.212	2.31754	655	698.821	-1.71222	575	601.464	-1.10364
1078	0	673	683.33	-0.398186	565	589.467	-1.02932	672	684.482	-0.481494	573	588.148	-0.632804	0	659	686.858	-1.08519	679	610.926	2.61246	659	691.111	-1.25085	623	614.993	0.320809	0	689	678.096	0.415418	608	620.784	-0.518455	708	691.776	0.609744	622	595.24	1.07297
1079	0	713	676.444	1.36903	545	583.321	-1.6415	709	677.572	1.18029	572	581.985	-0.417503	0	653	679.957	-1.05489	641	604.613	1.4372	652	684.172	-1.25994	595	608.673	-0.560542	0	661	671.224	-0.397656	626	614.425	0.462628	687	684.804	0.0837937	590	589.083	0.0377419
1080	0	649	669.63	-0.809808	620	577.243	1.71716	691	670.735	0.770906	546	575.89	-1.27918	0	697	673.127	0.904256	591	598.369	-0.303121	694	677.305	0.633732	600	602.422	-0.0988726	0	645	664.423	-0.764791	567	608.135	-1.72748	684	677.904	0.233087	569	582.993	-0.586614
1081	0	686	662.887	0.882446	602	571.231	1.25405	658	663.97	-0.232717	590	569.862	0.829083	0	695	666.368	1.08606	570	592.192	-0.929542	684	670.51	0.515817	606	596.238	0.39655	0	656	657.694	-0.066136	555	601.911	-1.99127	677	671.076	0.227688	545	576.968	-1.36938
1082	0	643	656.215	-0.521133	551	565.284	-0.608532	633	657.274	-0.964821	586	563.899	0.912984	0	639	659.68	-0.818095	607	586.083	0.849004	657	663.785	-0.264697	550	590.121	-1.71077	0	654	651.035	0.115949	572	595.755	-0.993236	695	664.318	1.16383	560	571.009	-0.465211
1083	0	626	649.611	-0.943703	561	559.403	0.067448	656	650.649	0.208915	545	558.001	-0.556919	0	627	653.061	-1.04079	600	580.039	0.814902	667	657.13	0.382182	567	584.07	-0.716883	0	653	644.445	0.334776	588	589.664	-0.0686323	691	657.631	1.26943	565	565.114	-0.00478889
1084	0	623	643.077	-0.804367	564	553.585	0.438565	629	644.093	-0.6018	561	552.168	0.372876	0	651	646.511	0.175926	569	574.061	-0.212157	610	650.543	-1.64156	556	578.085	-0.936598	0	615	637.924	-0.9244	601	583.639	0.708171	637	651.013	-0.555196	598	559.282	1.58328
1085	0	594	636.611	-1.74833	555	547.83	0.304346	635	637.605	-0.10339	521	546.399	-1.11274	0	618	640.029	-0.886151	591	568.147	0.940048	619	644.026	-1.00587	583	572.164	0.448799	0	640	631.472	0.337116	577	577.678	-0.0282348	615	644.463	-1.18806	537	553.514	-0.712623
1086	0	641	630.211	0.426128	613	542.138	2.86208	629	631.185	-0.0871337	546	540.692	0.227158	0	650	633.615	0.642687	580	562.297	0.735075	664	637.576	1.02547	553	566.306	-0.565846	0	626	625.086	0.0365284	581	571.781	0.382456	624	637.981	-0.559686	520	547.808	-1.21944
1087	0	612	623.879	-0.480169	507	536.508	-1.3105	607	624.832	-0.723785	534	535.048	-0.0453397	0	675	627.266	1.83726	558	556.51	0.0630634	620	631.192	-0.449487	610	560.512	2.0037	0	621	618.767	0.0896012	575	565.947	0.377518	610	631.566	-0.873188	517	542.163	-1.10665
1088	0	592	617.612	-1.05264	516	530.939	-0.657665	627	618.545	0.337653	549	529.465	0.833743	0	665	620.984	1.70686	591	550.786	1.65418	607	624.875	-0.725521	555	554.781	0.00931133	0	646	612.514	1.31748	601	560.176	1.66525	625	625.218	-0.00871094	542	536.579	0.232861
1089	0	613	611.41	0.0642058	536	525.431	0.456515	587	612.324	-1.04523	513	523.943	-0.483134	0	612	614.767	-0.111858	519	545.124	-1.1467	628	618.623	0.374174	583	549.111	1.40355	0	596	606.326	-0.422986	546	554.466	-0.362325	632	618.935	0.519691	542	531.055	0.470126
1090	0	602	605.273	-0.133405	505	519.982	-0.666706	645	606.167	1.52904	572	518.481	2.23775	0	615	608.615	0.257483	545	539.522	0.234645	661	612.436	1.88891	598	543.502	2.2286	0	626	600.203	1.03105	583	548.818	1.41569	590	612.717	-0.935263	536	525.591	0.449611
1091	0	581	599.2	-0.755054	524	514.593	0.410946	614	600.075	0.561982	516	513.078	0.12862	0	619	602.526	0.662151	554	533.981	0.850522	597	606.313	-0.38117	532	537.953	-0.258106	0	592	594.144	-0.0881046	567	543.229	0.998275	638	606.564	1.24456	547	520.185	1.14651
1092	0	580	593.189	-0.547662	515	509.262	0.252841	572	594.045	-0.92177	495	507.735	-0.572379	0	592	596.5	-0.184956	557	528.5	1.20759	640	600.254	1.57111	551	532.464	0.789642	0	613	588.147	1.00379	539	537.701	0.0559629	620	600.475	0.784164	515	514.838	0.00713264
1093	0	567	587.242	-0.850066	526	503.989	0.959722	541	588.079	-2.02409	516	502.449	0.596548	0	582	590.537	-0.353867	523	523.077	-0.00338948	586	594.257	-0.341092	534	527.034	0.301425	0	531	582.213	-2.22248	547	532.231	0.631468	616	594.448	0.868362	569	509.548	2.49234
1094	0	605	581.355	0.961289	505	498.773	0.277091	606	582.175	0.967827	504	497.221	0.301964	0	630	584.636	1.80736	507	517.714	-0.475809	587	588.322	-0.0545732	536	521.663	0.61926	0	600	576.342	0.965852	531	526.82	0.181391	569	588.483	-0.816786	517	504.316	0.557857
1095	0	601	575.53	1.03893	497	493.614	0.151892	581	576.332	0.193657	523	492.05	1.35337	0	622	578.795	1.73235	551	512.408	1.64409	597	582.449	0.595539	504	516.349	-0.550082	0	556	570.531	-0.616239	519	521.467	-0.108278	599	582.581	0.670875	555	499.139	2.37116
1096	0	575	569.766	0.218286	505	488.51	0.733777	555	570.55	-0.66006	457	486.935	-1.40028	0	532	573.015	-1.77824	496	507.159	-0.501033	588	576.636	0.468634	555	511.093	1.86376	0	576	564.78	0.467483	487	516.17	-1.32184	644	576.739	2.65046	482	494.018	-0.54742
1097	0	569	564.061	0.20706	511	483.462	1.2182	586	564.828	0.87461	496	481.875	0.634235	0	578	567.295	0.445252	522	501.966	0.876864	639	570.884	2.69464	533	505.892	1.17416	0	557	559.09	-0.0885547	523	510.931	0.527748	562	570.958	-0.377855	473	488.952	-0.733497
1098	0	562	558.415	0.151217	505	478.469	1.18063	569	559.165	0.412288	509	476.87	1.42413	0	568	561.635	0.267084	517	496.829	0.887104	552	565.191	-0.56143	501	500.748	0.0112619	0	563	553.459	0.402114	525	505.747	0.840272	570	565.236	0.199539	497	483.941	0.58577
1099	0	548	552.828	-0.206242	499	473.529	1.14023	576	553.562	0.934929	484	471.92	0.549094	0	577	556.032	0.872892	470	491.748	-1.00315	619	559.556	2.38924	492	495.659	-0.164945	0	576	547.886	1.17141	532	500.618	1.36056	549	559.573	-0.451268	479	478.984	0.000751573
1100	0	590	547.299	1.75798	479	468.643	0.473212	552	548.016	0.169563	483	467.023	0.726967	0	581	550.488	1.26584	546	486.721	2.5369	527	553.98	-1.17528	529	490.624	1.66852	0	565	542.372	0.951982	497	495.545	0.0652856	552	553.97	-0.0838319	456	474.079	-0.846637
1101	0	580	541.827	1.58506	496	463.81	1.44537	548	542.528	0.233741	487	462.18	1.12472	0	563	545.001	0.758558	506	481.748	1.07812	523	548.462	-1.11337	488	485.643	0.106685	0	554	536.914	0.725894	518	490.525	1.20719	527	548.423	-0.933221	508	469.228	1.72025
1102	0	548	536.412	0.495036	461	459.029	0.0917905	538	537.097	0.0389186	465	457.389	0.35297	0	507	539.571	-1.44653	451	476.829	-1.21623	560	543	0.71836	505	480.716	1.08063	0	545	531.514	0.577675	474	485.558	-0.530895	526	542.935	-0.738388	473	464.428	0.394146
1103	0	590	531.052	2.42684	455	454.3	0.0328214	546	531.723	0.611014	487	452.649	1.55657	0	499	534.197	-1.57563	477	471.962	0.230664	533	537.596	-0.199051	502	475.841	1.16752	0	501	526.17	-1.1245	489	480.645	0.377827	544	537.503	0.278578	495	459.68	1.58753
1104	0	585	525.749	2.44975	467	449.622	0.80417	562	526.404	1.50154	467	447.962	0.88099	0	551	528.878	0.942411	484	467.148	0.766005	536	532.246	0.162139	523	471.019	2.27297	0	528	520.881	0.309808	474	475.784	-0.0819361	567	532.126	1.46455	453	454.983	-0.0931437
1105	0	523	520.5	0.109331	449	444.994	0.18905	532	521.14	0.470837	456	443.325	0.593581	0	514	523.615	-0.424091	476	462.385	0.624034	548	526.952	0.89912	471	466.248	0.218953	0	529	515.648	0.580542	487	470.974	0.726187	570	526.806	1.80921	463	450.336	0.588567
1106	0	523	515.305	0.336471	464	440.416	1.09484	552	515.931	1.5352	482	438.738	1.97055	0	514	518.406	-0.194322	455	457.674	-0.12534	524	521.713	0.0999208	441	461.528	-0.977543	0	479	510.468	-1.43782	501	466.216	1.55402	538	521.54	0.709637	441	445.738	-0.22564
1107	0	518	510.164	0.344278	469	435.888	1.52897	519	510.776	0.361	447	434.2	0.605403	0	527	513.25	0.598957	455	453.012	0.0931763	563	516.527	1.95859	469	456.859	0.560612	0	528	505.343	0.986023	441	461.509	-0.976603	558	516.329	1.76409	448	441.19	0.321718
1108	0	553	505.077	2.0379	443	431.409	0.550723	555	505.674	2.09377	466	429.712	1.681	0	518	508.148	0.432878	495	448.401	2.09445	546	511.395	1.48094	440	452.24	-0.58351	0	517	500.271	0.735747	459	456.851	0.100302	542	511.171	1.32422	477	436.691	1.84561
1109	0	513	500.042	0.572124	450	426.978	1.08529	513	500.625	0.546359	441	425.272	0.748933	0	532	503.098	1.25305	420	443.84	-1.16326	547	506.316	1.73951	417	447.67	-1.50191	0	490	495.251	-0.237236	452	452.243	-0.0114332	516	506.067	0.437293	432	432.24	-0.0115598
1110	0	523	495.059	1.22179	418	422.594	-0.224706	519	495.629	1.02589	467	420.881	2.13415	0	529	498.101	1.34345	451	439.327	0.54967	527	501.29	1.11996	453	443.149	0.462858	0	473	490.284	-0.794729	515	447.684	2.9663	484	501.015	-0.773403	421	427.837	-0.333208
1111	0	499	490.127	0.397205	438	418.258	0.943312	483	490.684	-0.349625	435	416.536	0.885265	0	506	493.155	0.571041	471	434.862	1.66514	522	496.315	1.12422	444	438.676	0.252679	0	477	485.369	-0.383171	474	443.173	1.41591	534	496.015	1.64377	407	423.481	-0.81691
1112	0	483	485.247	-0.102222	427	413.969	0.63064	507	485.79	0.941963	459	412.239	2.18262	0	542	488.26	2.30834	446	430.445	0.736527	481	491.391	-0.473787	462	434.25	1.29102	0	511	480.504	1.34906	422	438.711	-0.813462	490	491.067	-0.0482015	406	419.171	-0.653655
1113	0	511	480.416	1.35294	450	409.725	1.89857	488	480.947	0.319269	415	407.988	0.344211	0	512	483.415	1.26328	432	426.076	0.285021	482	486.518	-0.205788	425	429.873	-0.236354	0	513	475.69	1.64728	420	434.295	-0.69754	480	486.17	-0.28161	409	414.907	-0.292087
1114	0	509	475.636	1.47883	451	405.528	2.14121	480	476.154	0.175537	434	403.783	1.45048	0	464	478.621	-0.67875	431	421.753	0.445402	493	481.695	0.509143	422	425.541	-0.172387	0	455	470.926	-0.746618	398	429.927	-1.60035	491	481.323	0.436716	473	410.689	2.86506
1115	0	489	470.905	0.818281	379	401.375	-1.14933	456	471.411	-0.721675	433	399.623	1.604	0	491	473.875	0.772817	441	417.477	1.12016	468	476.922	-0.412421	441	421.256	0.940183	0	482	466.211	0.719155	413	425.605	-0.620237	502	476.526	1.13695	396	406.516	-0.528447
1116	0	503	466.223	1.63981	391	397.267	-0.316951	458	466.716	-0.407292	390	395.508	-0.278904	0	458	469.179	-0.52237	410	413.246	-0.1603	478	472.198	0.265379	439	417.017	1.0492	0	445	461.546	-0.784338	468	421.328	2.15739	480	471.779	0.375243	423	402.387	1.00222
1117	0	461	461.589	-0.0274334	391	393.204	-0.111445	487	462.071	1.12966	401	391.437	0.477542	0	488	464.531	1.06238	410	409.06	0.0464144	463	467.522	-0.210179	455	412.822	1.97732	0	466	456.928	0.420235	449	417.098	1.50557	487	467.08	0.902647	424	398.303	1.24795
1118	0	405	457.003	-2.58405	366	389.184	-1.21183	467	457.473	0.440867	409	387.41	1.06754	0	462	459.931	0.0962529	394	404.919	-0.550104	501	462.895	1.7024	405	408.673	-0.182502	0	473	452.359	0.949074	413	412.911	0.00435935	496	462.43	1.50733	377	394.262	-0.889049
1119	0	446	452.464	-0.306083	338	385.207	-2.56772	438	452.923	-0.713023	406	383.427	1.12028	0	478	455.378	1.03469	384	400.822	-0.858472	416	458.315	-2.07468	416	404.567	0.560533	0	436	447.837	-0.566894	413	408.77	0.20816	469	457.828	0.515875	392	390.264	0.0876562
1120	0	429	447.972	-0.915978	389	381.273	0.391786	464	448.419	0.723325	378	379.486	-0.0764516	0	438	450.872	-0.615066	385	396.77	-0.599832	429	453.783	-1.19652	436	400.505	1.69988	0	444	443.362	0.0302753	423	404.672	0.891145	478	453.273	1.13098	367	386.309	-1.00794
1121	0	446	443.526	0.117136	382	377.381	0.236334	442	443.962	-0.0933362	362	375.588	-0.71418	0	475	446.413	1.31167	388	392.76	-0.241642	434	449.296	-0.734257	435	396.487	1.84656	0	442	438.933	0.145863	424	400.617	1.13556	475	448.765	1.20374	389	382.397	0.334811
1122	0	446	439.126	0.32548	381	373.531	0.382659	474	439.551	1.58228	348	371.732	-1.27216	0	459	441.999	0.793536	384	388.793	-0.244582	439	444.856	-0.279516	414	392.511	1.05613	0	420	434.551	-0.710002	420	396.606	1.14152	460	444.303	0.731853	426	378.525	2.30016
1123	0	433	434.772	-0.085138	384	369.722	0.728623	420	435.186	-0.741004	341	367.917	-1.45765	0	412	437.631	-1.26273	398	384.868	0.658241	456	440.462	0.72763	395	388.577	0.323156	0	444	430.214	0.65428	383	392.637	-0.492421	427	439.888	-0.623684	365	374.695	-0.507474
1124	0	451	430.462	0.967108	380	365.954	0.720547	454	430.866	1.08574	375	364.143	0.560637	0	436	433.307	0.128962	388	380.985	0.356118	426	436.113	-0.489965	372	384.685	-0.657713	0	432	425.921	0.292468	379	388.71	-0.498759	454	435.517	0.867427	394	370.906	1.16345
1125	0	460	426.196	1.57611	357	362.226	-0.276608	439	426.59	0.592299	329	360.41	-1.73169	0	447	429.028	0.850041	407	377.144	1.47992	453	431.808	0.995682	369	380.835	-0.616105	0	434	421.673	0.591699	392	384.824	0.362427	420	431.192	-0.546119	365	367.157	-0.112913
1126	0	437	421.975	0.718759	359	358.539	0.0243483	410	422.358	-0.610332	350	356.717	-0.35903	0	409	424.793	-0.780914	368	373.343	-0.278535	447	427.548	0.920065	387	377.025	0.507042	0	403	417.469	-0.720779	408	380.98	1.3377	393	426.911	-1.7106	353	363.448	-0.556104
1127	0	448	417.796	1.42698	383	354.89	1.43633	408	418.17	-0.5035	370	353.063	0.880498	0	432	420.601	0.548416	372	369.583	0.12531	434	423.331	0.512135	385	373.256	0.598529	0	451	413.309	1.77479	369	377.176	-0.425632	450	422.674	1.28814	326	359.779	-1.87083
1128	0	395	413.661	-0.938951	339	351.281	-0.667029	408	414.025	-0.298295	393	349.449	2.19686	0	408	416.453	-0.418475	356	365.863	-0.52274	406	419.157	-0.65299	337	369.527	-1.77185	0	415	409.192	0.2851	394	373.413	1.03718	420	418.481	0.0741187	377	356.148	1.07392
1129	0	398	409.569	-0.57988	344	347.711	-0.200074	434	409.923	1.15573	310	345.873	-2.03747	0	390	412.347	-1.13157	339	362.183	-1.2591	452	415.027	1.73908	346	365.837	-1.06644	0	369	405.118	-1.8802	396	369.689	1.32219	381	414.331	-1.70759	339	352.556	-0.736281
1130	0	406	405.518	0.0239255	318	344.178	-1.46802	441	405.863	1.67319	319	342.336	-1.30657	0	371	408.283	-1.93563	339	358.541	-1.06133	432	410.938	1.01333	337	362.186	-1.37199	0	370	401.085	-1.61604	373	366.004	0.362228	396	410.223	-0.714745	339	349.003	-0.543268
1131	0	388	401.509	-0.685809	324	340.684	-0.926885	436	401.845	1.63574	332	338.837	-0.375216	0	393	404.261	-0.568025	379	354.938	1.23596	405	406.892	-0.0940096	338	358.574	-1.11909	0	388	397.094	-0.461705	366	362.359	0.190337	438	406.158	1.52148	318	345.487	-1.54138
1132	0	405	397.541	0.370638	312	337.227	-1.42818	385	397.868	-0.65581	327	335.375	-0.463135	0	387	400.28	-0.675043	364	351.374	0.661776	389	402.887	-0.704097	350	355	-0.267291	0	381	393.145	-0.622219	333	358.752	-1.41118	406	402.134	0.191856	314	342.008	-1.58059
1133	0	407	393.614	0.663523	313	333.807	-1.17605	393	393.932	-0.0470105	306	331.95	-1.48347	0	368	396.339	-1.4773	324	347.848	-1.32487	428	398.923	1.40549	355	351.465	0.18764	0	401	389.237	0.587427	371	355.183	0.821204	373	398.152	-1.30231	317	338.566	-1.21129
1134	0	345	389.727	-2.40803	352	330.423	1.15007	361	390.036	-1.52824	309	328.562	-1.11285	0	373	392.44	-1.00655	364	344.359	1.02949	405	395	0.496919	317	347.966	-1.73923	0	385	385.369	-0.0187929	315	351.651	-2.06506	380	394.21	-0.728979	350	335.161	0.793164
1135	0	360	385.88	-1.36401	326	327.075	-0.0595428	367	386.181	-1.00124	306	325.21	-1.09817	0	376	388.58	-0.648759	344	340.907	0.166787	378	391.116	-0.674642	327	344.505	-0.968004	0	329	381.541	-2.89667	318	348.157	-1.69112	367	390.309	-1.21674	284	331.792	-2.83595
1136	0	338	382.073	-2.39724	323	323.763	-0.0424647	399	382.365	0.832777	323	321.894	0.0615303	0	361	384.76	-1.25051	348	337.491	0.563334	387	387.273	-0.0138825	321	341.08	-1.12073	0	378	377.752	0.0127378	331	344.7	-0.752997	386	386.449	-0.0228289	322	328.459	-0.359943
1137	0	382	378.304	0.189087	303	320.487	-1.00458	352	378.589	-1.41718	338	318.614	1.05448	1	367	380.978	-0.729669	311	334.112	-1.31056	392	383.469	0.430879	327	337.691	-0.591204	0	328	374.003	-2.5401	337	341.279	-0.233075	373	382.627	-0.498477	313	325.161	-0.687383
1138	0	432	374.575	2.76288	339	317.245	1.18157	366	374.851	-0.462645	322	315.368	0.36958	0	361	377.236	-0.854524	334	330.769	0.176807	372	379.704	-0.399428	320	334.338	-0.801509	0	388	370.293	0.898954	357	337.894	1.0112	363	378.845	-0.83165	308	321.898	-0.791916
1139	0	389	370.883	0.918566	292	314.038	-1.28967	371	371.152	-0.0078681	307	312.157	-0.294344	0	400	373.532	1.32341	333	327.461	0.303542	358	375.977	-0.950128	300	331.02	-1.79095	0	380	366.62	0.686353	329	334.545	-0.305685	373	375.102	-0.108826	326	318.67	0.405989
1140	0	395	367.229	1.39729	311	310.865	0.00765224	351	367.49	-0.880179	277	308.981	-1.92154	0	363	369.865	-0.360347	350	324.188	1.37971	351	372.289	-1.13631	339	327.738	0.611686	0	333	362.986	-1.64324	343	331.231	0.635483	355	371.397	-0.870253	319	315.476	0.197334
1141	0	356	363.613	-0.40349	305	307.726	-0.156088	330	363.866	-1.86428	320	305.838	0.791667	0	364	366.237	-0.117238	308	320.95	-0.737888	357	368.638	-0.615945	324	324.49	-0.0272081	0	326	359.39	-1.84929	309	327.952	-1.07812	359	367.73	-0.460746	296	312.315	-0.948297
1142	0	361	360.034	0.0508519	306	304.62	0.0788739	329	360.28	-1.7245	292	302.729	-0.627876	0	346	362.685	-0.896975	345	317.8	1.46442	333	365.071	-1.75747	311	321.329	-0.585692	0	333	355.83	-1.25109	339	324.707	0.776286	365	364.101	0.0470807	288	309.188	-1.24853
1143	0	337	356.491	-1.06175	288	301.548	-0.798302	387	356.73	1.53872	321	299.653	1.19146	0	371	359.178	0.613759	317	314.664	0.131174	382	361.536	1.04701	304	318.185	-0.813572	0	325	352.308	-1.51475	346	321.497	1.31731	336	360.508	-1.33704	278	306.094	-1.68499
1144	0	364	352.985	0.577349	278	298.508	-1.22997	326	353.216	-1.50738	317	296.61	1.14521	0	372	355.659	0.847262	285	311.527	-1.57133	373	357.995	0.776911	303	315.038	-0.691553	0	324	348.821	-1.37895	278	318.32	-2.41823	371	356.953	0.729282	287	303.033	-0.946415
1145	0	327	349.514	-1.24505	292	295.5	-0.204829	354	349.739	0.22647	284	293.599	-0.569628	0	372	352.175	1.02788	308	308.423	-0.0240977	325	354.491	-1.63584	292	311.924	-1.16594	0	315	345.371	-1.7112	294	315.177	-1.23505	322	353.434	-1.75176	280	300.005	-1.1955
1146	0	339	346.079	-0.384506	283	292.524	-0.566173	345	346.297	-0.0698395	274	290.621	-1.00411	0	327	348.727	-1.2015	301	305.351	-0.250816	372	351.022	1.08768	270	308.842	-2.36386	0	367	341.956	1.30728	310	312.066	-0.117364	347	349.951	-0.158432	290	297.008	-0.411517
1147	0	324	342.68	-1.03776	280	289.58	-0.572543	326	342.891	-0.935489	301	287.674	0.768088	0	333	345.314	-0.674808	293	302.313	-0.544047	376	347.588	1.46524	311	305.793	0.295252	0	321	338.577	-0.981034	310	308.989	0.0574288	359	346.504	0.659509	296	294.043	0.113757
1148	0	330	339.315	-0.512754	275	286.668	-0.703592	328	339.519	-0.636034	266	284.759	-1.15017	0	338	341.936	-0.214095	285	299.306	-0.847402	343	344.189	-0.0642228	270	302.776	-1.9947	0	312	335.232	-1.31525	284	305.944	-1.30211	351	343.092	0.422088	259	291.109	-1.99517
1149	0	346	335.984	0.538463	305	283.786	1.21471	365	336.182	1.5084	230	281.874	-3.42049	0	296	338.593	-2.47564	283	296.331	-0.792429	346	340.825	0.278181	280	299.791	-1.18274	0	350	331.922	0.966313	322	302.93	1.06271	367	339.715	1.42425	278	288.206	-0.61214
1150	0	319	332.687	-0.766346	255	280.935	-1.6241	361	332.879	1.48005	237	279.021	-2.72953	0	338	335.283	0.147778	316	293.387	1.27208	319	337.496	-1.03558	282	296.837	-0.883545	0	330	328.646	0.0745371	270	299.949	-1.82262	333	336.373	-0.184832	265	285.334	-1.24913
1151	0	338	329.424	0.466449	254	278.114	-1.51303	325	329.61	-0.255716	267	276.197	-0.562858	0	346	332.007	0.752241	275	290.474	-0.933149	341	334.2	0.36822	290	293.914	-0.229865	0	351	325.404	1.36623	283	296.998	-0.83211	347	333.065	0.748088	296	282.493	0.785103
1152	0	333	326.195	0.372923	248	275.323	-1.735	319	326.374	-0.412883	273	273.404	-0.0244396	0	339	328.765	0.555876	297	287.593	0.545866	321	330.938	-0.554705	281	291.022	-0.597884	0	320	322.195	-0.122703	299	294.079	0.284599	322	329.79	-0.434141	280	279.681	0.0190749
1153	0	332	322.998	0.494041	266	272.561	-0.4023	311	323.172	-0.690199	285	270.64	0.850603	0	319	325.556	-0.367065	292	284.741	0.424785	328	327.71	0.0160349	307	288.161	1.07522	0	302	319.019	-0.979352	258	291.19	-2.06632	352	326.55	1.35651	262	276.899	-0.920446
1154	0	352	319.834	1.71445	264	269.829	-0.358758	323	320.002	0.166816	274	267.906	0.368161	0	354	322.38	1.68061	297	281.92	0.875035	317	324.514	-0.422015	309	285.329	1.3466	0	296	315.876	-1.15529	313	288.331	1.39435	359	323.342	1.88196	244	274.146	-1.9299
1155	0	332	316.702	0.839567	276	267.126	0.534157	313	316.865	-0.218438	273	265.201	0.472042	0	296	319.235	-1.35053	282	279.128	0.171008	309	321.351	-0.702593	269	282.527	-0.824747	0	313	312.766	0.013239	258	285.503	-1.71225	292	320.167	-1.64835	259	271.422	-0.771877
1156	0	317	313.603	0.190819	266	264.451	0.0949573	326	313.759	0.677953	276	262.524	0.811157	0	302	316.123	-0.812699	271	276.366	-0.325965	314	318.219	-0.238116	289	279.754	0.54387	0	296	309.687	-0.795554	303	282.704	1.16598	332	317.025	0.821882	262	268.727	-0.4156
1157	0	285	310.534	-1.51253	265	261.805	0.196266	311	310.686	0.0178258	234	259.876	-1.69156	0	288	313.043	-1.47566	264	273.633	-0.592868	344	315.12	1.55709	265	277.011	-0.737807	0	333	306.64	1.4445	257	279.934	-1.4306	303	313.914	-0.627012	303	266.06	2.12212
1158	0	289	307.498	-1.08809	274	259.187	0.894904	319	307.643	0.635846	249	257.256	-0.523196	0	315	309.994	0.282076	275	270.929	0.245513	321	312.053	0.499396	308	274.296	1.92048	0	287	303.625	-0.981341	286	277.193	0.520737	295	310.836	-0.921999	289	263.422	1.5046
1159	0	292	304.491	-0.731011	248	256.596	-0.545853	308	304.632	0.191893	241	254.664	-0.88015	0	323	306.976	0.891622	274	268.253	0.347206	288	309.016	-1.23839	269	271.609	-0.159094	0	303	300.641	0.135546	280	274.482	0.329789	303	307.789	-0.27511	268	260.811	0.439138
1160	0	283	301.516	-1.10067	224	254.033	-2.00666	321	301.652	1.0799	244	252.099	-0.518474	0	296	303.988	-0.464306	271	265.605	0.327722	346	306.011	2.14984	274	268.951	0.305018	0	338	297.687	2.19274	259	271.798	-0.795227	307	304.773	0.127106	247	258.228	-0.714399
1161	0	318	298.571	1.08952	246	251.497	-0.350464	289	298.702	-0.570702	236	249.561	-0.882761	0	290	301.031	-0.647777	239	262.985	-1.55147	300	303.036	-0.175266	263	266.321	-0.204754	0	305	294.764	0.586134	275	269.142	0.353225	321	301.788	1.07232	249	255.672	-0.42279
1162	0	299	295.656	0.193379	240	248.988	-0.58014	312	295.782	0.918159	246	247.05	-0.0669788	0	297	298.104	-0.0640785	258	260.393	-0.148969	313	300.091	0.729658	274	263.718	0.621185	0	295	291.87	0.182211	284	266.515	1.03757	315	298.833	0.910895	291	253.142	2.21926
1163	0	277	292.771	-0.947574	261	246.505	0.897238	267	292.892	-1.58457	258	244.566	0.836339	0	301	295.207	0.333894	236	257.828	-1.42086	318	297.176	1.16774	255	261.142	-0.384613	0	289	289.007	-0.000409295	274	263.914	0.609297	307	295.909	0.633007	252	250.639	0.0857008
1164	0	267	289.915	-1.40236	246	244.048	0.124449	299	290.031	0.518667	250	242.109	0.499099	0	279	292.339	-0.798608	281	255.29	1.53376	319	294.291	1.38343	248	258.593	-0.672651	0	313	286.173	1.51635	261	261.341	-0.0211189	309	293.014	0.909397	260	248.163	0.734091
1165	0	238	287.088	-3.18189	238	241.617	-0.234482	295	287.2	0.454136	231	239.677	-0.570887	0	287	289.501	-0.147617	270	252.778	1.04809	305	291.435	0.776709	299	256.071	2.48267	0	301	283.368	1.01628	274	258.795	0.918572	268	290.149	-1.35298	244	245.713	-0.109649
1166	0	287	284.29	0.159986	244	239.212	0.306495	285	284.397	0.0356986	246	237.271	0.556565	0	289	286.691	0.135823	251	250.293	0.0446284	256	288.609	-2.03803	241	253.575	-0.810011	0	272	280.592	-0.520973	255	256.275	-0.0798585	317	287.313	1.66736	251	243.288	0.486769
1167	1	262	281.52	-1.20595	243	236.833	0.395631	309	281.623	1.5574	252	234.89	1.07783	0	278	283.91	-0.354444	259	247.834	0.693827	301	285.81	0.875509	240	251.105	-0.716817	0	307	277.845	1.66399	257	253.782	0.200743	293	284.507	0.496192	229	240.889	-0.785644
1168	0	251	278.778	-1.75335	243	234.478	0.546677	309	278.877	1.71361	213	232.534	-1.33848	0	279	281.157	-0.12912	222	245.401	-1.57055	332	283.041	2.68698	251	248.661	0.14765	0	302	275.125	1.54646	239	251.315	-0.796559	292	281.728	0.601102	260	238.515	1.33245
1169	0	262	276.065	-0.868916	216	232.148	-1.09876	295	276.16	1.09692	248	230.204	1.13006	0	248	278.432	-1.93241	246	242.993	0.191724	277	280.299	-0.198233	253	246.242	0.424861	0	288	272.434	0.917234	285	248.873	2.13999	277	278.978	-0.118876	263	236.166	1.65466
1170	0	312	273.378	2.18651	239	229.843	0.592307	304	273.47	1.75104	249	227.898	1.3373	0	284	275.734	0.490486	260	240.61	1.20249	309	277.586	1.78711	269	243.849	1.5335	0	294	269.77	1.4131	263	246.457	1.0201	273	276.257	-0.197102	225	233.841	-0.589429
1171	0	284	270.765	0.785346	240	227.653	0.796981	270	270.9	-0.0547979	249	225.715	1.47561	0	290	273.064	0.994511	247	238.253	0.556564	295	274.899	1.1703	263	241.48	1.32696	0	268	267.134	0.0528973	263	244.066	1.16754	280	273.563	0.384711	226	231.541	-0.368605
1172	0	295	268.209	1.5598	254	225.426	1.79289	277	268.295	0.523056	235	223.482	0.751367	0	275	270.421	0.276121	253	235.92	1.0738	264	272.24	-0.507163	279	239.137	2.38657	0	269	264.525	0.272859	249	241.7	0.462639	267	270.896	-0.238429	233	229.265	0.244662
1173	0	277	265.603	0.684776	220	223.191	-0.21517	289	265.684	1.37151	272	221.247	3.07738	0	301	267.805	1.91334	250	233.612	1.03649	278	269.608	0.503293	241	236.817	0.269445	0	285	261.942	1.36582	253	239.358	0.857649	303	268.257	1.99596	237	227.013	0.648706
1174	0	256	263.023	-0.43894	234	220.98	0.851118	249	263.101	-0.893598	222	219.035	0.199002	0	282	265.215	0.999527	225	231.327	-0.421829	253	267.003	-0.88037	251	234.522	1.04009	0	272	259.386	0.764817	254	237.041	1.06409	255	265.644	-0.666552	234	224.785	0.602418
1175	0	271	260.469	0.6397	228	218.792	0.609779	259	260.543	-0.0958982	209	216.847	-0.542764	0	280	262.652	1.03677	234	229.067	0.322473	277	264.424	0.755603	226	232.25	-0.415772	0	275	256.857	1.09409	234	234.748	-0.0489213	301	263.058	2.18694	246	222.58	1.49323
1176	0	247	257.941	-0.696175	234	216.628	1.13566	266	258.012	0.48978	232	214.681	1.13702	0	272	260.114	0.720694	241	226.83	0.912743	260	261.872	-0.116067	251	230.003	1.32534	0	246	254.353	-0.532556	240	232.479	0.485459	269	260.498	0.518347	230	220.398	0.63317
1177	0	268	255.439	0.767287	236	214.486	1.40047	268	255.506	0.763177	219	212.539	0.436596	0	253	257.602	-0.289332	215	224.617	-0.655882	268	259.345	0.52871	235	227.778	0.471097	0	257	251.875	0.319707	253	230.234	1.43129	272	257.965	0.850999	237	218.238	1.21871
1178	0	203	252.962	-3.50665	231	212.366	1.22603	279	253.026	1.55502	240	210.419	1.90944	0	249	255.116	-0.387565	233	222.427	0.692664	253	256.843	-0.241628	230	225.577	0.291651	0	281	249.422	1.88378	231	228.012	0.196608	286	255.457	1.80603	251	216.102	2.20277
1179	0	283	250.51	1.93132	210	210.269	-0.0185352	237	250.571	-0.88153	220	208.322	0.78736	0	250	252.654	-0.167878	240	220.26	1.27424	266	254.367	0.713242	230	223.398	0.435294	0	259	246.994	0.745987	250	225.813	1.52973	255	252.975	0.126808	212	213.987	-0.136487
1180	0	246	248.083	-0.132819	226	208.193	1.18449	222	248.141	-1.75446	224	206.246	1.18623	0	276	250.218	1.5519	239	218.115	1.35094	253	251.917	0.0681217	242	221.243	1.33434	0	264	244.592	1.19449	228	223.637	0.288965	251	250.518	0.0304165	223	211.895	0.743642
1181	0	253	245.681	0.460156	211	206.14	0.334599	283	245.735	2.21515	208	204.192	0.264006	0	275	247.806	1.63985	219	215.993	0.203212	236	249.49	-0.878147	227	219.109	0.523737	0	270	242.214	1.69102	229	221.483	0.496722	242	248.086	-0.391235	225	209.825	1.01169
1182	0	259	243.303	0.975384	203	204.108	-0.0777397	259	243.354	0.97217	220	202.16	1.20274	0	252	245.419	0.414575	207	213.893	-0.479071	230	247.089	-1.1268	237	216.998	1.29929	0	251	239.86	0.703146	201	219.352	-1.29446	240	245.679	-0.366579	222	207.776	0.954651
1183	0	228	240.949	-0.857546	202	202.097	-0.00681524	262	240.998	1.29754	196	200.15	-0.296411	0	261	243.056	1.11073	239	211.814	1.75849	248	244.712	0.208817	220	214.908	0.343284	0	222	237.53	-1.04234	221	217.243	0.252716	279	243.296	2.13752	198	205.749	-0.550676
1184	0	228	238.618	-0.703223	208	200.107	0.547269	242	238.665	0.21441	214	198.16	1.08279	0	257	240.716	1.01576	222	209.758	0.821636	253	242.358	0.669037	224	212.84	0.745629	0	212	235.225	-1.59509	220	215.156	0.326583	260	240.938	1.18218	251	203.743	2.98286
1185	0	229	236.312	-0.483178	229	198.138	2.0394	258	236.355	1.34754	194	196.192	-0.157345	0	244	238.4	0.358479	209	207.723	0.0883452	247	240.029	0.443559	203	210.794	-0.547035	0	221	232.943	-0.803352	198	213.09	-1.07244	229	238.603	-0.634609	249	201.757	2.99388
1186	0	233	234.029	-0.0673795	213	196.19	1.15179	246	234.069	0.760672	197	194.244	0.196387	0	227	236.108	-0.604518	213	205.709	0.499575	233	237.723	-0.309416	256	208.769	2.95195	0	269	230.684	2.33617	243	211.047	2.04982	273	236.293	2.22163	218	199.793	1.23314
1187	0	235	231.768	0.210813	192	194.262	-0.163265	256	231.807	1.51209	217	192.316	1.67565	0	241	233.839	0.461299	199	203.716	-0.33431	239	235.44	0.230247	213	206.765	0.427243	0	233	228.448	0.298192	222	209.024	0.870912	252	234.005	1.13356	218	197.849	1.36481
1188	0	231	229.531	0.0966577	196	192.355	0.260386	245	229.567	0.985994	188	190.409	-0.175677	0	242	231.592	0.669028	231	201.744	1.92491	239	233.181	0.376403	201	204.781	-0.266695	0	241	226.236	0.951063	211	207.022	0.273867	214	231.741	-1.21277	163	195.925	-2.5789
1189	0	237	227.316	0.629034	169	190.467	-1.6513	239	227.35	0.7536	196	188.522	0.534181	0	224	229.369	-0.358708	234	199.792	2.23623	257	230.944	1.62531	208	202.818	0.359304	0	245	224.045	1.33874	206	205.041	0.0668347	244	229.5	0.928247	200	194.022	0.422743
1190	0	257	225.124	1.98839	200	188.599	0.80618	236	225.155	0.705953	208	186.654	1.48008	0	222	227.167	-0.34681	192	197.861	-0.422977	246	228.73	1.10109	218	200.875	1.15983	0	197	221.878	-1.77246	195	203.08	-0.578632	226	227.282	-0.0852823	178	192.138	-1.05967
1191	0	229	222.953	0.399564	176	186.75	-0.810344	238	222.982	0.973442	170	184.806	-1.13557	0	222	224.988	-0.200559	197	195.95	0.0748281	225	226.538	-0.102559	205	198.953	0.422365	0	218	219.732	-0.117315	190	201.14	-0.808172	250	225.086	1.57568	224	190.274	2.25345
1192	0	218	220.805	-0.189991	184	184.921	-0.0679165	224	220.832	0.211673	188	182.977	0.366303	0	249	222.831	1.65838	200	194.058	0.420135	240	224.369	1.00899	184	197.05	-0.962048	0	231	217.608	0.881096	199	199.22	-0.0155738	211	222.913	-0.82012	192	188.429	0.257733
1193	0	209	218.679	-0.669477	177	183.111	-0.459346	200	218.703	-1.32252	154	181.168	-2.18927	0	226	220.696	0.352834	191	192.187	-0.0858671	222	222.221	-0.0148331	191	195.167	-0.301491	0	240	215.507	1.58104	212	197.319	1.00827	216	220.762	-0.323983	183	186.603	-0.266355
1194	0	222	216.573	0.364215	171	181.32	-0.789193	238	216.596	1.38741	186	179.378	0.485573	0	202	218.582	-1.1667	210	190.334	1.35705	216	220.095	-0.278624	192	193.303	-0.0940322	0	214	213.426	0.0392298	181	195.439	-1.07322	226	218.632	0.49011	196	184.797	0.800242
1195	0	232	214.489	1.14963	189	179.548	0.687564	213	214.51	-0.103472	208	177.606	2.10745	0	232	216.489	1.01833	204	188.501	1.08511	214	217.99	-0.27277	188	191.458	-0.252233	0	223	211.367	0.779007	202	193.577	0.592602	201	216.524	-1.09499	195	183.009	0.858705
1196	0	225	212.426	0.83824	213	177.794	2.4123	210	212.445	-0.168743	171	175.853	-0.371102	0	217	214.418	0.175298	167	186.688	-1.52347	237	215.907	1.37015	191	189.633	0.0989163	0	243	209.329	2.16001	191	191.736	-0.0532258	208	214.438	-0.446367	173	181.24	-0.626451
1197	0	232	210.384	1.41914	177	176.058	0.0708155	214	210.401	0.245998	162	174.118	-0.952077	0	202	212.367	-0.729419	166	184.892	-1.46633	188	213.844	-1.8849	183	187.826	-0.356769	0	207	207.311	-0.0216449	212	189.913	1.51696	206	212.372	-0.443974	160	179.489	-1.54073
1198	0	226	208.363	1.17322	194	174.34	1.41149	219	208.378	0.717764	181	172.401	0.639138	0	205	210.337	-0.372746	189	183.116	0.428007	222	211.803	0.684392	205	186.038	1.32435	0	208	205.315	0.186195	180	188.109	-0.604381	213	210.328	0.183095	177	177.756	-0.0568506
1199	0	194	206.362	-0.887502	182	172.641	0.693771	211	206.375	0.318383	179	170.702	0.620182	0	202	208.327	-0.445184	170	181.358	-0.871103	222	209.782	0.820036	182	184.269	-0.168156	0	221	203.338	1.18806	205	186.323	1.30445	236	208.304	1.80285	194	176.042	1.28933
1200	0	199	204.38	-0.381409	171	170.958	0.00317505	191	204.393	-0.969053	173	169.022	0.302477	0	202	206.338	-0.305208	181	179.618	0.102728	241	207.781	2.13982	172	182.517	-0.801922	0	227	201.382	1.70032	184	184.556	-0.0410012	184	206.301	-1.64405	209	174.345	2.39713
1201	0	193	202.419	-0.678018	186	169.294	1.22495	218	202.43	1.05454	175	167.358	0.577673	0	190	204.368	-1.04239	200	177.896	1.56298	195	205.8	-0.773436	196	180.784	1.08688	0	198	199.446	-0.102745	206	182.807	1.6159	202	204.318	-0.163102	194	172.666	1.5317
1202	0	221	200.478	1.38046	177	167.647	0.703032	197	200.487	-0.248447	191	165.712	1.82977	0	181	202.419	-1.59204	199	176.192	1.61681	203	203.84	-0.0589433	182	179.068	0.217328	0	193	197.529	-0.326022	192	181.077	0.788321	198	202.355	-0.309521	179	171.004	0.597633
1203	0	192	198.556	-0.47315	171	166.017	0.381082	192	198.564	-0.473709	186	164.083	1.60702	0	182	200.489	-1.37047	189	174.506	1.0543	202	201.899	0.00711156	150	177.37	-2.23476	0	223	195.632	1.83268	177	179.364	-0.177677	201	200.412	0.0414397	189	169.36	1.42862
1204	0	203	196.654	0.445425	169	164.404	0.35357	177	196.66	-1.47774	161	162.471	-0.115953	0	208	198.578	0.653305	172	172.837	-0.0638118	214	199.978	0.958555	163	175.69	-0.993925	0	196	193.755	0.160385	184	177.669	0.466753	192	198.489	-0.468324	153	167.732	-1.19104
1205	0	202	194.77	0.508679	171	162.807	0.626514	191	194.775	-0.273183	176	160.876	1.14	0	174	196.686	-1.71985	174	171.185	0.213384	192	198.076	-0.438462	165	174.026	-0.702698	0	182	191.896	-0.733548	182	175.991	0.445422	186	196.586	-0.776172	168	166.122	0.144899
1206	0	200	192.906	0.501629	174	161.227	0.96828	192	192.91	-0.0656628	157	159.298	-0.183382	0	211	194.814	1.1143	186	169.551	1.20612	217	196.193	1.4125	137	172.38	-3.02273	0	206	190.056	1.11083	165	174.331	-0.72638	203	194.701	0.582466	155	164.528	-0.765313
1207	0	222	191.06	2.07654	172	159.664	0.940598	177	191.063	-1.05704	153	157.736	-0.382865	0	186	192.96	-0.510338	158	167.933	-0.790238	210	194.329	1.08143	163	170.751	-0.607093	0	180	188.236	-0.613853	166	172.687	-0.519027	224	192.836	2.08225	168	162.951	0.389554
1208	0	179	189.233	-0.764858	186	158.117	2.04448	162	189.235	-2.13977	154	156.19	-0.17648	0	191	191.125	-0.00903806	171	166.332	0.356953	197	192.483	0.321799	148	169.138	-1.73755	0	176	186.433	-0.786449	179	171.061	0.593403	192	190.989	0.0729418	174	161.39	0.955972
1209	0	188	187.424	0.0419849	163	156.586	0.502385	208	187.425	1.42662	147	154.661	-0.631824	0	208	189.308	1.29605	148	164.748	-1.37667	194	190.657	0.24004	165	167.542	-0.19791	0	165	184.649	-1.52971	156	169.451	-1.07695	169	189.161	-1.55089	140	159.845	-1.67722
1210	0	173	185.634	-0.960526	165	155.071	0.772986	151	185.633	-2.81843	173	153.147	1.50941	0	181	187.51	-0.483853	157	163.18	-0.493209	184	188.848	-0.35742	158	165.963	-0.633463	0	167	182.884	-1.22912	152	167.858	-1.28626	184	187.352	-0.247128	144	158.316	-1.19303
1211	0	175	183.861	-0.669837	159	153.571	0.43052	188	183.86	0.301947	163	151.649	0.889091	0	177	185.729	-0.656115	146	161.628	-1.29339	164	187.058	-1.80053	175	164.399	0.80136	0	173	181.136	-0.618561	179	166.281	0.950634	156	185.561	-2.36679	150	156.803	-0.555496
1212	0	173	182.106	-0.692338	158	152.087	0.470379	208	182.104	1.79555	160	150.167	0.777406	0	187	183.966	0.221842	163	160.092	0.22775	199	185.286	0.972169	177	162.851	1.06347	0	174	179.406	-0.409818	164	164.721	-0.0562941	187	183.788	0.234862	150	155.306	-0.433244
1213	0	165	180.369	-1.19648	141	150.619	-0.810056	203	180.366	1.58858	135	148.7	-1.17907	0	187	182.221	0.349452	149	158.572	-0.784198	179	183.531	-0.338695	179	161.32	1.32148	0	167	177.693	-0.827483	136	163.177	-2.33037	165	182.033	-1.32605	139	153.824	-1.25738
1214	0	196	178.649	1.23934	150	149.166	0.0681319	165	178.646	-1.06231	156	147.248	0.700726	0	185	180.494	0.331308	144	157.068	-1.08901	173	181.795	-0.668642	139	159.804	-1.76456	0	186	175.998	0.733352	136	161.648	-2.19929	186	180.296	0.418226	154	152.358	0.132325
1215	0	167	176.947	-0.769699	136	147.727	-1.00561	163	176.942	-1.09206	165	145.811	1.49383	0	161	178.783	-1.40153	145	155.579	-0.878567	168	180.075	-0.931625	129	158.303	-2.58002	0	172	174.321	-0.176947	153	160.135	-0.576839	211	178.577	2.23213	150	150.907	-0.0740237
1216	0	174	175.261	-0.0956136	146	146.304	-0.0251492	159	175.256	-1.28921	160	144.39	1.2341	0	168	177.09	-0.70133	146	154.106	-0.670851	156	178.373	-1.79128	147	156.818	-0.809793	0	167	172.66	-0.437976	163	158.638	0.341674	189	176.874	0.882021	153	149.47	0.285359
1217	0	176	173.593	0.181461	127	144.895	-1.58794	180	173.587	0.477985	136	142.983	-0.598774	0	185	175.414	0.704774	165	152.648	0.961625	176	176.688	-0.0518602	134	155.348	-1.84421	0	158	171.016	-1.0355	172	157.156	1.13185	179	175.189	0.284836	155	148.049	0.558328
1218	0	154	171.941	-1.44571	139	143.501	-0.381779	179	171.935	0.528079	126	141.591	-1.38892	0	189	173.755	1.10894	121	151.204	-2.74586	148	175.02	-2.22102	154	153.893	0.00859851	0	156	169.389	-1.07197	164	155.689	0.648967	183	173.521	0.700701	136	146.642	-0.912554
1219	0	162	170.305	-0.652538	128	142.121	-1.24817	158	170.299	-0.978453	145	140.213	0.397558	0	167	172.112	-0.395552	120	149.776	-2.71818	179	173.368	0.420928	149	152.453	-0.282896	0	162	167.778	-0.453982	164	154.238	0.762323	196	171.87	1.72358	134	145.25	-0.971843
1220	0	169	168.686	0.0241148	137	140.756	-0.320896	151	168.68	-1.43874	138	138.849	-0.0722924	0	165	170.485	-0.427022	118	148.363	-2.79509	147	171.733	-2.03998	131	151.028	-1.74984	0	145	166.184	-1.75923	157	152.801	0.335138	168	170.235	-0.172461	140	143.872	-0.327246
1221	0	157	167.084	-0.804774	146	139.405	0.545833	174	167.077	0.524869	126	137.5	-1.02449	0	160	168.875	-0.701629	151	146.963	0.328496	156	170.115	-1.1301	138	149.617	-0.988896	0	140	164.606	-2.07958	154	151.379	0.21123	167	168.617	-0.125152	146	142.508	0.288967
1222	0	153	165.497	-1.01033	143	138.067	0.412492	161	165.489	-0.353821	111	136.165	-2.38851	0	163	167.281	-0.335301	114	145.579	-2.95761	157	168.513	-0.918806	158	148.22	0.778021	0	159	163.044	-0.320694	134	149.971	-1.37971	174	167.016	0.529485	152	141.159	0.879334
1223	0	175	163.926	0.837095	132	136.744	-0.41289	180	163.918	1.19865	119	134.843	-1.45232	0	153	165.703	-1.02694	127	144.208	-1.52698	164	166.926	-0.228507	155	146.838	0.655572	0	165	161.498	0.272665	150	148.578	0.116088	151	165.43	-1.1743	153	139.823	1.06528
1224	0	140	162.371	-1.89071	131	135.434	-0.387386	177	162.363	1.10018	132	133.535	-0.133614	0	155	164.14	-0.734153	138	142.852	-0.413011	174	165.356	0.655307	155	145.47	0.765465	0	171	159.967	0.843714	138	147.199	-0.783109	156	163.861	-0.629346	138	138.501	-0.0426758
1225	0	179	160.832	1.35797	128	134.137	-0.542479	176	160.823	1.14399	135	132.241	0.237473	0	188	162.593	1.85298	131	141.509	-0.918203	153	163.801	-0.873228	116	144.116	-2.61049	0	138	158.452	-1.74099	154	145.835	0.65797	168	162.307	0.439238	138	137.193	0.0686892
1226	0	161	159.307	0.133393	142	132.854	0.767479	170	159.299	0.820727	111	130.96	-1.89451	0	167	161.062	0.459512	151	140.181	0.880469	157	162.262	-0.419963	124	142.775	-1.68608	0	159	156.952	0.162391	167	144.484	1.74233	154	160.769	-0.545444	126	135.898	-0.881812
1227	0	139	157.798	-1.59447	115	131.585	-1.54653	170	157.79	0.936464	126	129.692	-0.328935	0	153	159.546	-0.529181	157	138.866	1.44728	167	160.738	0.484539	122	141.448	-1.76079	0	156	155.468	0.0426037	140	143.147	-0.265995	140	159.246	-1.62661	169	134.617	2.64485
1228	0	143	156.305	-1.11259	123	130.328	-0.660737	163	156.296	0.525088	132	128.438	0.310051	0	175	158.044	1.28171	128	137.564	-0.845348	167	159.23	0.601269	134	140.135	-0.530001	0	149	153.999	-0.40949	114	141.824	-2.60597	155	157.739	-0.220008	131	133.349	-0.205205
1229	0	120	154.826	-3.17914	152	129.084	1.85872	155	154.817	0.0146829	112	127.196	-1.43591	0	186	156.558	2.15876	145	136.276	0.724504	175	157.737	1.305	124	138.835	-1.33224	0	156	152.544	0.276707	120	140.514	-1.87271	161	156.247	0.374582	125	132.094	-0.634464
1230	0	165	153.362	0.906053	139	127.853	0.945462	159	153.353	0.447829	117	125.968	-0.829051	0	157	155.087	0.152664	110	135.001	-2.38374	145	156.258	-0.934926	149	137.548	0.938144	0	140	151.104	-0.93847	142	139.218	0.23344	165	154.77	0.796393	117	130.851	-1.28055
1231	0	146	151.912	-0.489279	126	126.635	-0.0565596	157	151.904	0.406734	120	124.752	-0.433757	0	156	153.631	0.189715	146	133.739	1.01473	156	154.794	0.0965336	135	136.275	-0.109718	0	148	149.679	-0.138004	154	137.935	1.29453	165	153.308	0.910216	147	129.622	1.43333
1232	0	145	150.477	-0.45483	128	125.429	0.227237	164	150.469	1.05662	126	123.548	0.218428	0	191	152.188	2.80831	139	132.49	0.552177	150	153.345	-0.273134	139	135.014	0.338084	0	178	148.268	2.2285	146	136.665	0.77254	154	151.861	0.172388	128	128.405	-0.0357972
1233	0	159	149.056	0.788601	116	124.236	-0.764671	150	149.048	0.0777202	130	122.357	0.670321	0	160	150.761	0.730446	141	131.254	0.820785	130	151.911	-1.92169	152	133.766	1.47897	0	146	146.872	-0.0721339	134	135.408	-0.121671	153	150.428	0.207939	139	127.201	1.0008
1234	0	163	147.649	1.20234	123	123.055	-0.00492825	153	147.642	0.433188	137	121.178	1.35172	0	153	149.347	0.295332	145	130.03	1.24318	155	150.49	0.362227	116	132.531	-1.53485	0	136	145.489	-0.813693	148	134.164	1.13728	150	149.01	0.080866	134	126.009	0.690335
1235	0	159	146.257	1.01059	114	121.886	-0.738564	167	146.25	1.60573	110	120.012	-0.954603	0	145	147.947	-0.244768	154	128.819	2.02913	162	149.084	1.01476	125	131.308	-0.564206	0	159	144.121	1.18	127	132.933	-0.526467	131	147.606	-1.45083	113	124.829	-1.11279
1236	0	153	144.878	0.656603	110	120.729	-1.02295	133	144.871	-1.02935	138	118.858	1.62952	0	149	146.562	0.199745	134	127.621	0.551104	157	147.692	0.742849	119	130.098	-1.01732	0	148	142.766	0.430213	139	131.714	0.617976	158	146.216	0.937517	116	123.662	-0.711359
1237	0	140	143.513	-0.296928	128	119.584	0.743904	160	143.506	1.30393	140	117.715	1.88343	0	149	145.19	0.312131	127	126.434	0.0502124	164	146.314	1.38105	151	128.899	1.79851	0	158	141.425	1.31861	137	130.508	0.554668	147	144.84	0.178183	118	122.506	-0.414813
1238	0	148	142.162	0.479886	109	118.45	-0.905181	150	142.155	0.640497	103	116.584	-1.33848	0	168	143.832	1.86462	110	125.26	-1.45497	146	144.95	0.0869393	121	127.713	-0.610321	0	161	140.098	1.64731	136	129.314	0.573345	155	143.477	0.925508	135	121.362	1.17374
1239	0	151	140.824	0.828108	115	117.329	-0.217151	139	140.818	-0.154209	130	115.465	1.2748	0	149	142.487	0.533561	102	124.098	-2.18799	147	143.599	0.280536	130	126.54	0.303501	0	156	138.784	1.37837	135	128.132	0.59112	150	142.129	0.642655	115	120.23	-0.487737
1240	0	131	139.5	-0.742602	115	116.219	-0.113626	138	139.494	-0.127178	102	114.357	-1.22357	0	160	141.156	1.48977	129	122.947	0.532914	166	142.261	1.84248	112	125.377	-1.26405	0	142	137.483	0.379017	130	126.962	0.266455	136	140.794	-0.411105	135	119.11	1.36759
1241	0	154	138.188	1.27416	116	115.12	0.0817333	141	138.183	0.237223	98	113.261	-1.54162	0	142	139.838	0.181467	112	121.809	-0.926829	139	140.937	-0.164319	134	124.227	0.84425	0	135	136.196	-0.102934	123	125.804	-0.252828	136	139.473	-0.297793	122	118.001	0.362032
1242	0	130	136.89	-0.604269	126	114.032	1.06618	122	136.885	-1.34766	106	112.176	-0.599903	0	143	138.532	0.37359	109	120.682	-1.1189	114	139.626	-2.40014	128	123.088	0.43413	0	135	134.922	0.00675807	129	124.658	0.382306	154	138.165	1.27605	120	116.904	0.282646
1243	0	156	135.604	1.63296	101	112.956	-1.18965	137	135.601	0.119565	104	111.103	-0.696474	0	130	137.24	-0.635027	124	119.566	0.398174	134	138.329	-0.373942	151	121.961	2.36315	0	145	133.66	0.941749	119	123.523	-0.414656	142	136.87	0.430525	141	115.818	2.12074
1244	0	135	134.332	0.0575237	117	111.89	0.472381	121	134.328	-1.21168	129	110.04	1.66933	0	144	135.961	0.669905	118	118.462	-0.0425304	170	137.044	2.52762	127	120.845	0.546137	0	148	132.411	1.28141	122	122.4	-0.0362524	145	135.588	0.781648	108	114.743	-0.648795
1245	0	152	133.072	1.53529	114	110.836	0.29634	147	133.069	1.14899	112	108.988	0.284579	0	121	134.695	-1.24496	133	117.369	1.35537	146	135.772	0.846494	119	119.741	-0.0679082	0	144	131.175	1.06878	127	121.289	0.506777	151	134.319	1.35751	111	113.678	-0.254223
1246	0	129	131.824	-0.248653	101	109.792	-0.874865	111	131.822	-1.97638	136	107.947	2.40549	0	139	133.44	0.471551	113	116.287	-0.309252	138	134.512	0.296885	114	118.647	-0.435267	0	128	129.951	-0.172426	141	120.189	1.75263	135	133.062	0.166776	120	112.625	0.673219
1247	0	144	130.589	1.11758	110	108.759	0.118297	122	130.588	-0.777533	133	106.917	2.26166	0	117	132.199	-1.40514	120	115.217	0.436654	141	133.266	0.65136	136	117.565	1.58079	0	144	128.739	1.27173	140	119.1	1.7664	143	131.819	0.935044	113	111.583	0.133312
1248	0	113	129.366	-1.53961	113	107.737	0.495114	129	129.366	-0.032235	124	105.898	1.62564	0	137	130.97	0.515215	125	114.157	0.969837	137	132.031	0.424522	118	116.493	0.138681	0	141	127.54	1.13354	121	118.022	0.270753	131	130.587	0.0360635	111	110.551	0.042601
1249	0	130	128.156	0.161764	118	106.725	1.03796	104	128.156	-2.36872	103	104.888	-0.186077	0	136	129.752	0.535726	127	113.108	1.23273	159	130.809	2.2357	111	115.433	-0.420749	0	144	126.353	1.4706	123	116.955	0.545084	133	129.368	0.314906	121	109.53	1.04272
1250	0	135	126.957	0.692234	101	105.723	-0.469982	136	126.959	0.775303	114	103.89	0.946915	0	141	128.547	1.0487	95	112.07	-1.7513	140	129.599	0.879053	118	114.383	0.332982	0	136	125.177	0.928019	108	115.899	-0.760039	145	128.162	1.39835	133	108.519	2.12274
1251	0	139	125.77	1.12214	115	104.732	0.957509	144	125.773	1.51895	108	102.901	0.490631	0	129	127.354	0.144907	112	111.042	0.0905434	131	128.401	0.227082	126	113.344	1.12753	0	116	124.014	-0.744093	113	114.853	-0.174327	143	126.967	1.34074	105	107.519	-0.245826
1252	0	160	124.595	2.79899	97	103.751	-0.685418	127	124.599	0.21309	82	101.923	-2.20011	0	142	126.173	1.32819	111	110.025	0.0925934	154	127.215	2.15841	102	112.315	-1.02129	0	108	122.862	-1.43014	128	113.818	1.2535	128	125.784	0.195821	102	106.529	-0.448422
1253	0	112	123.432	-1.08021	109	102.779	0.595833	136	123.436	1.07733	94	100.955	-0.717307	0	119	125.003	-0.550309	110	109.017	0.093679	140	126.041	1.17979	119	111.296	0.706228	0	124	121.722	0.20454	99	112.794	-1.38634	134	124.614	0.810843	118	105.549	1.14622
1254	0	115	122.28	-0.678875	109	101.818	0.687914	138	122.285	1.33771	115	99.9962	1.39911	0	127	123.845	0.279956	131	108.021	2.00771	142	124.878	1.43685	112	110.288	0.161804	0	118	120.594	-0.23877	119	111.78	0.661854	133	123.455	0.827671	116	104.579	1.06043
1255	0	129	121.14	0.692056	100	100.866	-0.0866424	120	121.146	-0.104626	98	99.0476	-0.105827	0	126	122.698	0.294129	107	107.034	-0.00329911	140	123.727	1.37533	112	109.289	0.256125	0	125	119.476	0.494043	111	110.776	0.021227	128	122.308	0.503153	100	103.619	-0.361876
1256	0	108	120.011	-1.15573	82	99.9246	-1.97944	124	120.018	0.357583	101	98.1088	0.287683	0	121	121.563	-0.0511905	111	106.058	0.469118	118	122.587	-0.42229	111	108.301	0.256154	0	127	118.37	0.765753	110	109.783	0.020702	116	121.172	-0.480171	113	102.668	0.971907
1257	0	119	118.893	0.00982637	105	98.9923	0.586288	112	118.901	-0.652115	112	97.1796	1.40039	0	114	120.439	-0.603068	93	105.091	-1.25376	108	121.459	-1.29509	100	107.323	-0.732301	0	118	117.275	0.066698	123	108.799	1.28042	136	120.047	1.36795	100	101.728	-0.172791
1258	0	114	117.786	-0.354591	89	98.0696	-0.961374	129	117.796	0.986487	112	96.26	1.48729	0	113	119.326	-0.595099	97	104.134	-0.724345	122	120.342	0.150127	105	106.355	-0.132195	0	111	116.192	-0.492762	104	107.826	-0.375171	135	118.934	1.38275	120	100.797	1.75299
1259	0	127	116.69	0.914852	112	97.1562	1.4026	109	116.701	-0.73762	107	95.3497	1.12628	0	132	118.224	1.19905	115	103.187	1.10159	108	119.236	-1.08116	99	105.396	-0.642811	0	125	115.118	0.883824	111	106.862	0.392722	116	117.832	-0.170083	104	99.8755	0.404443
1260	0	122	115.605	0.578963	103	96.2522	0.664881	91	115.617	-2.58058	105	94.4488	1.02969	0	114	117.133	-0.293418	100	102.249	-0.224925	109	118.141	-0.875519	103	104.447	-0.142558	0	119	114.056	0.453187	106	105.909	0.00888053	101	116.741	-1.56627	101	98.9634	0.20265
1261	0	123	114.531	0.763635	92	95.3573	-0.350027	131	114.544	1.43776	104	93.5571	1.02401	0	117	116.052	0.087598	92	101.321	-0.971802	132	117.056	1.30067	111	103.507	0.711181	0	111	113.005	-0.190281	109	104.964	0.386542	115	115.661	-0.0616118	107	98.0606	0.864201
1262	0	117	113.467	0.326604	101	94.4716	0.6496	125	113.482	1.03022	79	92.6745	-1.5385	0	118	114.983	0.277758	110	100.403	0.915082	125	115.983	0.806502	104	102.577	0.139527	0	131	111.964	1.66321	112	104.03	0.753119	117	114.591	0.222673	108	97.1671	1.0424
1263	0	113	112.414	0.0551146	104	93.5949	1.02031	117	112.43	0.422504	100	91.801	0.819905	0	133	113.924	1.65413	108	99.4932	0.818568	123	114.92	0.72853	89	101.656	-1.34156	0	135	110.933	2.07134	122	103.105	1.71071	123	113.533	0.853626	119	96.2826	2.0825
1264	0	122	111.371	0.962267	89	92.727	-0.395066	109	111.388	-0.22878	86	90.9363	-0.532298	0	120	112.875	0.65043	102	98.5931	0.337338	124	113.868	0.909886	95	100.745	-0.58939	0	112	109.913	0.197209	110	102.189	0.744777	120	112.485	0.686038	96	95.4072	0.0605051
1265	0	131	110.339	1.80516	115	91.868	2.15707	116	110.358	0.523895	86	90.0806	-0.440019	0	123	111.837	1.00658	99	97.702	0.130452	112	112.826	-0.0780572	120	99.8422	1.84015	0	121	108.903	1.09973	100	101.282	-0.128213	119	111.447	0.692354	73	94.5406	-2.52114
1266	0	130	109.317	1.81403	89	91.0178	-0.213882	115	109.337	0.52811	87	89.2335	-0.23946	0	97	110.808	-1.40203	103	96.82	0.608934	109	111.794	-0.267669	90	98.9487	-0.94328	0	109	107.903	0.105064	108	100.385	0.732781	122	110.42	1.04839	108	93.683	1.37766
1267	0	125	108.305	1.49327	106	90.1761	1.53695	122	108.326	1.23799	94	88.3952	0.578095	0	118	109.79	0.755761	98	95.9469	0.207394	98	110.773	-1.29029	108	98.0642	0.95607	0	106	106.913	-0.0887038	110	99.4964	1.00148	103	109.403	-0.630936	98	92.834	0.521846
1268	0	107	107.303	-0.0292561	85	89.343	-0.471067	107	107.325	-0.0314474	87	87.5654	-0.0606131	0	125	108.782	1.45055	98	95.0826	0.294698	110	109.762	0.0226901	95	97.1886	-0.224542	0	109	105.933	0.293731	96	98.617	-0.267093	103	108.397	-0.531743	101	91.9937	0.896164
1269	0	113	106.31	0.629303	83	88.5184	-0.605721	148	106.335	3.42488	83	86.744	-0.410961	0	106	107.784	-0.173301	87	94.2271	-0.774827	104	108.761	-0.466838	94	96.3217	-0.23946	0	127	104.963	1.95544	91	97.7464	-0.70722	96	107.4	-1.1635	90	91.1619	-0.122473
1270	0	106	105.328	0.0652701	109	87.7021	2.03997	123	105.354	1.59112	89	85.9311	0.325304	0	115	106.796	0.765029	70	93.3802	-2.79447	97	107.769	-1.09348	92	95.4634	-0.361085	0	115	104.003	1.02549	85	96.8847	-1.28908	121	106.413	1.32607	109	90.3386	1.78744
1271	0	111	104.355	0.630688	94	86.8941	0.732918	100	104.382	-0.438241	88	85.1264	0.306323	0	104	105.817	-0.178215	72	92.5419	-2.42088	149	106.788	3.45814	95	94.6137	0.0396319	0	101	103.052	-0.204193	101	96.0317	0.494366	118	105.436	1.15657	90	89.5236	0.050214
1272	0	99	103.392	-0.441428	76	86.0943	-1.15789	105	103.421	0.154111	93	84.33	0.899038	0	108	104.849	0.303251	85	91.712	-0.728019	91	105.816	-1.55317	101	93.7725	0.719162	0	104	102.111	0.185243	87	95.1872	-0.877764	99	104.469	-0.549693	77	88.717	-1.33527
1273	0	100	102.439	-0.243853	86	85.3026	0.0752045	90	102.469	-1.31432	85	83.5417	0.158177	0	92	103.889	-1.23953	100	90.8905	0.910949	99	104.854	-0.588363	110	92.9397	1.62664	0	105	101.179	0.372885	100	94.3513	0.564868	105	103.512	0.145218	89	87.9185	0.114638
1274	0	107	101.494	0.532256	92	84.5189	0.77996	96	101.526	-0.564009	99	82.7614	1.63204	0	99	102.939	-0.395902	94	90.0773	0.404595	106	103.901	0.203825	95	92.1152	0.295974	0	98	100.257	-0.227948	86	93.5238	-0.811314	116	102.564	1.24749	91	87.1282	0.405878
1275	0	109	100.559	0.808464	90	83.7431	0.659532	107	100.593	0.619403	83	81.9891	0.110963	0	106	101.999	0.388656	89	89.2723	-0.028863	89	102.958	-1.47957	88	91.2989	-0.351666	0	108	99.3433	0.832991	100	92.7046	0.729536	94	101.626	-0.786533	94	86.3459	0.789465
1276	0	112	99.6337	1.16851	87	82.9752	0.4315	97	99.6688	-0.270974	82	81.2246	0.0856267	0	101	101.067	-0.00668207	84	88.4754	-0.488306	109	102.024	0.668147	96	90.4908	0.562284	0	118	98.4392	1.80072	93	91.8937	0.114716	107	100.697	0.609364	77	85.5715	-0.976812
1277	0	89	98.7171	-1.03001	97	82.2151	1.50118	113	98.7539	1.34016	80	80.468	-0.0523183	0	92	100.145	-0.849165	88	87.6865	0.0334167	100	101.1	-0.109965	84	89.6907	-0.620903	0	105	97.5441	0.727625	99	91.091	0.794888	100	99.7769	0.0223061	77	84.805	-0.88946
1278	0	107	97.8095	0.888476	79	81.4626	-0.27707	99	97.848	0.115781	86	79.719	0.677299	0	113	99.2317	1.29521	103	86.9056	1.58583	95	100.184	-0.531878	73	88.8985	-1.86078	0	111	96.6579	1.36129	89	90.2963	-0.137405	81	98.8664	-1.98515	85	84.0463	0.103449
1279	0	110	96.9109	1.248	80	80.7178	-0.0802546	92	96.9511	-0.516187	73	78.9776	-0.699631	0	86	98.3275	-1.3293	98	86.1325	1.19879	83	99.2776	-1.7867	87	88.1143	-0.119464	0	91	95.7806	-0.501145	77	89.5096	-1.4256	94	97.9649	-0.408944	91	83.2952	0.807681
1280	0	92	96.0211	-0.419231	81	79.9805	0.113276	105	96.0631	0.872156	66	78.2439	-1.50711	0	102	97.4321	0.45229	86	85.3673	0.068228	85	98.38	-1.45127	80	87.3378	-0.820395	0	95	94.9121	0.00902052	90	88.7308	0.133784	105	97.0724	0.773659	73	82.5518	-1.11795
1281	0	103	95.1401	0.774459	80	79.2507	0.0837792	96	95.1838	0.0833039	94	77.5175	1.70004	0	93	96.5455	-0.367653	60	84.6097	-3.1771	84	97.4913	-1.47202	91	86.5691	0.464484	0	114	94.0522	1.86828	109	87.9599	2.01528	89	96.1887	-0.762004	95	81.8159	1.35266
1282	0	118	94.2677	2.18473	63	78.5282	-1.95636	88	94.3132	-0.672991	66	76.7986	-1.32922	0	93	95.6676	-0.276619	76	83.8598	-0.901575	96	96.6114	-0.0623996	89	85.808	0.338349	0	104	93.2009	1.05893	77	87.1967	-1.16202	104	95.3139	0.851739	83	81.0875	0.209923
1283	0	90	93.4039	-0.358808	75	77.813	-0.324814	89	93.4513	-0.471831	74	76.087	-0.242603	0	86	94.7983	-0.948749	83	83.1173	-0.0128798	109	95.7401	1.27006	84	85.0545	-0.115054	0	106	92.3581	1.32501	76	86.4411	-1.19768	81	94.4479	-1.49421	77	80.3665	-0.383645
1284	0	87	92.5487	-0.594879	67	77.105	-1.23452	98	92.5978	0.545705	72	75.3825	-0.398638	0	92	93.9376	-0.202004	82	82.3824	-0.0422274	88	94.8775	-0.733141	79	84.3084	-0.597247	0	74	91.5238	-2.0371	79	85.6932	-0.753042	91	93.5904	-0.271547	86	79.6527	0.684442
1285	0	88	91.7018	-0.39461	67	76.4042	-1.1489	87	91.7528	-0.50955	83	74.6853	0.912655	0	93	93.0852	-0.00883535	72	81.6548	-1.13783	92	94.0233	-0.210945	88	83.5698	0.472259	0	98	90.6977	0.737643	94	84.9527	0.933153	97	92.7415	0.432388	85	78.9463	0.656621
1286	0	106	90.8632	1.47022	82	75.7104	0.694571	97	90.9161	0.617727	80	73.9952	0.671361	0	80	92.2412	-1.36861	68	80.9346	-1.56855	96	93.1776	0.288063	91	82.8385	0.855557	0	79	89.8799	-1.22408	94	84.2197	1.00876	100	91.901	0.809899	82	78.2469	0.41446
1287	0	95	90.0329	0.509615	69	75.0236	-0.725159	86	90.0876	-0.440783	52	73.312	-2.95545	0	100	91.4055	0.859454	84	80.2215	0.412264	94	92.3402	0.171198	79	82.1145	-0.350404	0	80	89.0702	-1.01408	83	83.4941	-0.0542323	93	91.0689	0.200244	71	77.5546	-0.777893
1288	0	72	89.2107	-2.0283	62	74.3438	-1.56766	94	89.2674	0.488129	78	72.6358	0.607375	0	98	90.5779	0.749746	85	79.5157	0.59486	116	91.511	2.27374	79	81.3976	-0.269748	0	69	88.2686	-2.31967	73	82.7757	-1.14416	79	90.2451	-1.26517	73	76.8694	-0.452877
1289	0	102	88.3966	1.34694	75	73.6708	0.153486	86	88.4553	-0.264757	70	71.9665	-0.235037	0	84	89.7584	-0.628296	81	78.8169	0.242569	110	90.69	1.84113	82	80.6878	0.144908	0	114	87.475	2.48429	75	82.0645	-0.815741	99	89.4295	0.961873	80	76.1911	0.425852
1290	0	78	87.5905	-1.08591	71	73.0045	-0.237896	100	87.6511	1.23489	72	71.3039	0.0820351	0	76	88.947	-1.48512	77	78.1251	-0.128217	84	89.8771	-0.641248	94	79.9851	1.44553	0	96	86.6893	0.950272	81	81.3605	-0.0400526	76	88.622	-1.44784	75	75.5196	-0.0599982
1291	0	89	86.7923	0.234016	72	72.345	-0.0406624	77	86.8549	-1.12307	77	70.6481	0.723869	0	74	88.1435	-1.64414	84	77.4403	0.715727	73	89.0722	-1.88111	92	79.2893	1.32518	0	88	85.9114	0.222649	89	80.6635	0.883669	80	87.8225	-0.874585	76	74.8549	0.131349
1292	0	80	86.0019	-0.671035	59	71.6922	-1.65238	89	86.0665	0.310948	58	69.9989	-1.57553	0	83	87.3478	-0.477231	75	76.7623	-0.20349	82	88.2753	-0.692987	81	78.6004	0.266624	0	74	85.1412	-1.29514	77	79.9735	-0.338859	66	87.031	-2.58874	69	74.197	-0.625642
1293	0	87	85.2193	0.190911	75	71.0459	0.456587	102	85.2859	1.65494	77	69.3563	0.871081	0	90	86.5599	0.36262	71	76.0911	-0.6042	89	87.4861	0.160469	72	77.9183	-0.69748	0	98	84.3787	1.37596	92	79.2904	1.32507	87	86.2474	0.0806906	72	73.5457	-0.18216
1294	0	91	84.4443	0.68722	66	70.406	-0.542345	94	84.513	0.978509	54	68.7202	-2.00317	0	69	85.7797	-2.02004	79	75.4266	0.402037	96	86.7048	0.94869	85	77.243	0.841367	0	71	83.6238	-1.49817	78	78.6141	-0.0695329	90	85.4715	0.477344	63	72.901	-1.2474
1295	0	81	83.677	-0.297443	63	69.7726	-0.853274	91	83.7477	0.760246	67	68.0905	-0.133232	0	80	85.0071	-0.55981	68	74.7688	-0.820837	91	85.9311	0.531367	70	76.5743	-0.785781	0	70	82.8764	-1.53902	71	77.9446	-0.824172	77	84.7034	-0.877881	66	72.2627	-0.77089
1296	0	74	82.9172	-1.0366	50	69.1456	-2.7076	77	82.99	-0.682619	66	67.4673	-0.180609	0	95	84.242	1.10374	66	74.1176	-0.999203	75	85.165	-1.17375	88	75.9123	1.28856	0	77	82.1364	-0.585349	81	77.2818	0.413134	77	83.9429	-0.791213	71	71.631	-0.0748837
1297	0	73	82.1648	-1.07265	62	68.5249	-0.828665	82	82.2397	-0.0264671	65	66.8503	-0.229504	0	93	83.4845	0.986716	72	73.4728	-0.173577	81	84.4065	-0.378497	63	75.2568	-1.54421	0	81	81.4038	-0.0448651	75	76.6256	-0.18771	84	83.1899	0.088388	64	71.0056	-0.875699
1298	0	82	81.4197	0.0640808	74	67.9104	0.707898	84	81.4968	0.273125	68	66.2396	0.213479	0	81	82.7343	-0.192696	77	72.8346	0.474695	84	83.6554	0.0376011	80	74.6077	0.602875	0	82	80.6784	0.145942	75	75.976	-0.112698	77	82.4444	-0.620451	76	70.3865	0.643911
1299	0	84	80.682	0.362025	55	67.3021	-1.65882	94	80.7612	1.36548	75	65.6351	1.08137	0	71	81.9914	-1.30444	71	72.2027	-0.142731	87	82.9117	0.438315	73	73.9651	-0.112955	0	90	79.9603	1.05828	72	75.3329	-0.392783	69	81.7064	-1.52967	67	69.7737	-0.33886
1300	0	74	79.9515	-0.691844	56	66.6999	-1.42983	79	80.0328	-0.1162	75	65.0367	1.15047	0	82	81.2558	0.0821884	59	71.5771	-1.6374	89	82.1753	0.72342	86	73.3288	1.36637	0	76	79.2493	-0.372717	66	74.6962	-1.07042	88	80.9756	0.748801	68	69.167	-0.141524
1301	0	68	79.2281	-1.36161	75	66.1037	1.02725	77	79.3116	-0.263433	58	64.4443	-0.846178	0	81	80.5273	0.0525241	76	70.9578	0.578383	77	81.4461	-0.50668	77	72.6988	0.490171	0	75	78.5453	-0.409376	73	74.0658	-0.124745	71	80.2521	-1.09803	67	68.5665	-0.19138
1302	0	72	78.5118	-0.767423	57	65.5135	-1.12765	72	78.5975	-0.777523	78	63.8579	1.60128	0	90	79.8059	1.07455	68	70.3446	-0.284329	87	80.7241	0.672848	69	72.075	-0.370181	0	71	77.8483	-0.812746	73	73.4418	-0.0517047	79	79.5358	-0.0602845	80	67.972	1.34477
1303	0	79	77.8025	0.134728	54	64.9293	-1.48728	72	77.8904	-0.694193	63	63.2775	-0.0349588	0	68	79.0915	-1.34505	68	69.7376	-0.210716	93	80.0092	1.34709	88	71.4573	1.76346	0	67	77.1583	-1.24103	62	72.8239	-1.37464	82	78.8266	0.350442	61	67.3836	-0.817331
1304	0	85	77.1001	0.856859	61	64.3508	-0.429031	74	77.1903	-0.370864	61	62.7029	-0.218033	0	78	78.3842	-0.043497	75	69.1366	0.677042	82	79.3013	0.298026	84	70.8457	1.43525	0	69	76.475	-0.899887	73	72.2123	0.0921965	84	78.1244	0.641075	69	66.801	0.264728
1305	0	78	76.4047	0.180637	64	63.7782	0.0277238	83	76.497	0.713793	58	62.1341	-0.542836	0	78	77.6837	0.035819	79	68.5417	1.17665	84	78.6003	0.589156	91	70.2401	2.17622	0	81	75.7986	0.577937	73	71.6067	0.163072	91	77.4292	1.4226	51	66.2243	-2.13183
1306	0	72	75.716	-0.43793	66	63.2113	0.343263	81	75.8106	0.576601	54	61.5711	-1.03029	0	69	76.9899	-0.961877	69	67.9526	0.126088	77	77.9062	-0.103273	65	69.6405	-0.575588	0	61	75.1288	-1.80901	68	71.0072	-0.364675	73	76.7409	-0.437844	71	65.6535	0.634519
1307	0	95	75.034	2.04847	63	62.6501	0.0440837	73	75.1309	-0.249403	69	61.0137	0.961434	0	78	76.303	0.192146	70	67.3695	0.31441	78	77.2189	0.0884376	68	69.0468	-0.126947	0	60	74.4657	-1.86751	65	70.4136	-0.671479	76	76.0594	-0.00681918	61	65.0883	-0.523456
1308	0	62	74.3587	-1.56955	62	62.0945	-0.0120007	66	74.4579	-1.04109	60	60.462	-0.0596447	0	58	75.6227	-2.31398	65	66.7921	-0.222284	77	76.5384	0.0526043	76	68.459	0.865016	0	65	73.8091	-1.09264	75	69.826	0.597442	63	75.3847	-1.56033	59	64.5289	-0.719799
1309	0	76	73.6899	0.264982	62	61.5444	0.057856	88	73.7915	1.51464	42	59.9158	-2.76448	0	87	74.9491	1.29199	97	66.2205	3.12518	75	75.8645	-0.0998276	65	67.8769	-0.356832	0	83	73.1591	1.08018	59	69.2442	-1.33368	76	74.7167	0.147207	63	63.9751	-0.122847
1310	0	81	73.0277	0.885806	59	60.9999	-0.260364	71	73.1316	-0.252972	48	59.3752	-1.64187	0	56	74.282	-2.44303	67	65.6546	0.164368	62	75.1973	-1.67606	73	67.3005	0.667076	0	84	72.5154	1.25307	62	68.6682	-0.846864	71	74.0552	-0.362591	78	63.4268	1.65009
1311	0	75	72.372	0.303454	67	60.4608	0.798891	87	72.4782	1.5569	67	58.84	0.996902	0	85	73.6214	1.23419	65	65.0943	-0.0116973	70	74.5365	-0.542221	67	66.7298	0.0330124	0	82	71.8782	1.11777	70	68.0979	0.227339	69	73.4004	-0.529741	61	62.8841	-0.241235
1312	0	79	71.7227	0.818764	67	59.9271	0.864095	73	71.8312	0.136799	69	58.3102	1.2869	0	70	72.9671	-0.354639	73	64.5396	0.990215	92	73.8823	1.8889	62	66.1647	-0.528914	0	77	71.2472	0.655591	82	67.5334	1.59757	68	72.752	-0.576261	55	62.3468	-0.990647
1313	0	89	71.0797	1.89955	59	59.3987	-0.0519049	74	71.1905	0.326593	53	57.7857	-0.657372	0	63	72.3193	-1.17412	68	63.9904	0.486236	79	73.2344	0.648676	65	65.6051	-0.0750537	0	83	70.6225	1.35861	71	66.9744	0.477753	75	72.11	0.333709	58	61.815	-0.50093
1314	0	65	70.4429	-0.67511	53	58.8756	-0.807073	79	70.5562	0.950004	58	57.2666	0.0963044	0	84	71.6777	1.34448	56	63.4467	-0.995103	96	72.5929	2.38897	81	65.051	1.77211	0	61	70.0039	-1.15284	73	66.421	0.770019	66	71.4744	-0.673849	67	61.2884	0.697778
1315	0	70	69.8124	0.022426	55	58.3577	-0.452751	67	69.928	-0.357717	54	56.7526	-0.374584	0	75	71.0423	0.456993	63	62.9083	0.011548	76	71.9577	0.463682	76	64.5024	1.31887	0	100	69.3915	3.06085	66	65.873	0.0156278	66	70.845	-0.596383	66	60.7672	0.644112
1316	0	68	69.188	-0.144064	47	57.845	-1.5819	66	69.306	-0.406947	70	56.2439	1.64417	0	68	70.4131	-0.292635	59	62.3754	-0.439435	87	71.3287	1.68014	58	63.9591	-0.782468	0	64	68.7851	-0.598139	59	65.3306	-0.82417	61	70.2219	-1.18075	50	60.2512	-1.44974
1317	0	60	68.5697	-1.10634	64	57.3374	0.83283	58	68.6902	-1.40369	64	55.7402	1.03248	0	84	69.79	1.55043	73	61.8477	1.30528	71	70.7059	0.0349084	71	63.4211	0.899444	0	71	68.1847	0.334115	67	64.7935	0.269568	53	69.605	-2.28087	73	59.7404	1.55192
1318	1	67	67.9574	-0.116961	58	56.8348	0.152996	70	68.0803	0.229447	50	55.2416	-0.741277	0	76	69.173	0.783112	58	61.3252	-0.436624	74	70.0891	0.454633	65	62.8885	0.261904	0	55	67.5902	-1.69766	70	64.2617	0.685854	67	68.9942	-0.243625	66	59.2347	0.83275
1319	0	87	67.351	2.10659	42	56.3373	-2.21229	66	67.4764	-0.181734	57	54.7481	0.298277	0	69	68.5619	0.0527395	64	60.808	0.399004	58	69.4784	-1.50718	66	62.361	0.447931	0	74	67.0016	0.813547	57	63.7353	-0.892108	74	68.3894	0.652224	52	58.7341	-0.933851
1320	0	64	66.7506	-0.343824	47	55.8447	-1.29013	71	66.8785	0.489138	67	54.2595	1.55651	0	65	67.9568	-0.366741	56	60.2958	-0.574056	81	68.8736	1.34738	55	61.8387	-0.922128	0	66	66.4188	-0.0515489	62	63.214	-0.154179	79	67.7905	1.26116	71	58.2385	1.51451
1321	0	75	66.156	1.02122	61	55.357	0.722508	73	66.2863	0.785775	52	53.7758	-0.246255	0	56	67.3575	-1.5177	67	59.7888	0.880989	79	68.2748	1.20668	63	61.3215	0.211474	0	67	65.8417	0.141507	59	62.6979	-0.481429	60	67.1976	-0.92921	67	57.7479	1.13033
1322	0	67	65.6127	0.169492	48	54.9653	-1.00535	75	65.7936	1.06306	56	53.3961	0.347958	0	56	66.764	-1.4384	70	59.2868	1.28048	61	67.6818	-0.855513	70	60.8093	1.09849	0	74	65.2703	1.0148	65	62.187	0.348913	75	66.6106	0.968727	62	57.2622	0.601703
1323	0	71	65.1058	0.699509	60	54.5171	0.707845	76	65.2429	1.23392	55	52.9461	0.276946	0	64	66.1762	-0.272027	59	58.7897	0.0273763	70	67.0946	0.347266	64	60.3022	0.462227	0	57	64.7046	-1.0205	61	61.6811	-0.0872024	87	66.0293	2.24829	70	56.7814	1.57993
1324	0	78	64.5271	1.52551	64	54.0424	1.2447	69	64.6666	0.521676	47	52.4754	-0.798672	0	68	65.5941	0.291753	50	58.2976	-1.17346	68	66.5131	0.180313	70	59.8	1.21913	0	82	64.1444	1.97182	66	61.1802	0.593278	76	65.4538	1.20973	51	56.3053	-0.742897
1325	0	76	63.954	1.38177	48	53.5725	-0.804319	60	64.096	-0.528792	62	52.0095	1.2688	0	71	65.0177	0.709967	58	57.8103	0.024903	70	65.9373	0.485584	67	59.3027	0.940374	0	77	63.5897	1.52824	72	60.6843	1.33357	70	64.884	0.611479	54	55.8341	-0.24959
1326	0	60	63.3864	-0.437188	59	53.1072	0.767173	67	63.531	0.423809	52	51.5482	0.0626557	0	77	64.4468	1.43057	58	57.3279	0.0882491	64	65.3671	-0.170893	48	58.8103	-1.56033	0	59	63.0405	-0.52603	61	60.1933	0.103293	63	64.3198	-0.166279	45	55.3676	-1.54551
1327	0	69	62.8244	0.743454	60	52.6466	0.949319	63	62.9715	0.0035959	57	51.0915	0.782595	0	57	63.8815	-0.911477	66	56.8503	1.12625	70	64.8025	0.621215	57	58.3226	-0.175188	0	73	62.4967	1.22932	60	59.7071	0.0378127	72	63.7612	0.970955	61	54.9057	0.78029
1328	0	69	62.2678	0.810458	54	52.1906	0.246233	85	62.4174	2.44943	56	50.6395	0.71633	0	72	63.3216	1.02276	50	56.3773	-0.901891	74	64.2434	1.13418	58	57.8398	0.0210406	0	66	61.9583	0.497504	63	59.2258	0.475509	51	63.2081	-1.70947	61	54.4485	0.838831
1329	0	63	61.7167	0.161685	60	51.739	1.06648	65	61.8688	0.388379	49	50.192	-0.170281	0	76	62.7671	1.51791	64	55.9091	1.01137	62	63.6898	-0.214606	56	57.3616	-0.18195	0	52	61.4251	-1.30703	54	58.7492	-0.646283	90	62.6604	2.88185	51	53.9959	-0.419505
1330	0	65	61.1709	0.474948	48	51.292	-0.475164	78	61.3255	1.88801	43	49.7489	-1.0292	0	63	62.218	0.098522	47	55.4455	-1.2319	72	63.1416	1.04398	59	56.8881	0.274948	0	63	60.8972	0.264932	67	58.2773	1.06564	59	62.1181	-0.405946	60	53.5478	0.832982
1331	0	68	60.6303	0.893705	52	50.8494	0.159553	62	60.7876	0.15398	52	49.3104	0.372986	0	62	61.6742	0.0413788	55	54.9864	0.00183117	64	62.5987	0.175164	70	56.4192	1.62322	0	63	60.3744	0.33079	72	57.8101	1.67229	75	61.5812	1.54947	57	53.1041	0.516023
1332	0	66	60.095	0.72685	62	50.4113	1.47177	71	60.2549	1.27521	51	48.8762	0.297395	0	53	61.1356	-1.11751	71	54.5319	1.9544	59	62.0611	-0.398519	62	55.9548	0.767736	0	76	59.8568	1.85175	58	57.3475	0.0856719	59	61.0496	-0.266835	44	52.6649	-1.30629
1333	0	64	59.565	0.554381	50	49.9774	0.00319426	67	59.7274	0.888495	52	48.4464	0.492803	0	59	60.6022	-0.208592	51	54.0819	-0.431551	59	61.5287	-0.329212	67	55.495	1.40556	0	82	59.3443	2.5019	55	56.8895	-0.254785	54	60.5232	-0.887697	57	52.2301	0.631787
1334	0	78	59.04	2.1468	42	49.5479	-1.16466	50	59.205	-1.30178	69	48.0208	2.5256	0	53	60.074	-0.971687	58	53.6363	0.57298	54	61.0016	-0.952791	56	55.0397	0.128329	0	65	58.8368	0.764449	63	56.4361	0.82698	88	60.002	2.9846	56	51.7997	0.561295
1335	0	79	58.5202	2.30416	55	49.1226	0.792508	69	58.6878	1.24145	48	47.5996	0.0577958	0	68	59.5508	1.02461	57	53.1951	0.503966	63	60.4795	0.317551	57	54.5888	0.319377	0	52	58.3343	-0.87841	62	55.987	0.763647	64	59.486	0.564255	53	51.3735	0.223417
1336	0	73	58.0053	1.75499	45	48.7015	-0.551793	81	58.1755	2.53605	48	47.1825	0.117989	0	72	59.0327	1.52821	44	52.7583	-1.32037	55	59.9626	-0.669152	55	54.1422	0.115663	0	60	57.8367	0.279279	61	55.5425	0.698767	55	58.975	-0.535987	63	50.9516	1.51795
1337	0	57	57.4955	-0.0656299	55	48.2847	0.905497	52	57.6683	-0.786056	48	46.7697	0.17758	0	74	58.5196	1.79956	63	52.3258	1.34482	56	59.4507	-0.461112	64	53.7	1.2875	0	58	57.344	0.0861353	75	55.1023	2.29759	49	58.469	-1.35272	51	50.5339	0.0652647
1338	0	54	56.9906	-0.406969	51	47.8719	0.438022	61	57.1661	0.490885	52	46.361	0.781993	0	56	58.0115	-0.268792	69	51.8975	2.0589	61	58.9437	0.26328	75	53.2621	2.51008	0	42	56.8561	-2.29235	54	54.6664	-0.0906877	65	57.9681	0.872203	63	50.1204	1.62268
1339	0	56	56.4906	-0.0655582	33	47.4632	-2.51773	63	56.6687	0.797668	67	45.9563	2.57089	0	60	57.5082	0.321694	51	51.4735	-0.0663037	61	58.4417	0.327555	53	52.8285	0.0235627	0	64	56.373	0.953371	60	54.2349	0.744276	60	57.4721	0.326358	52	49.711	0.317424
1340	0	52	55.9954	-0.554066	53	47.0586	0.816112	60	56.1762	0.493651	48	45.5558	0.352795	0	57	57.0097	-0.00128945	54	51.0536	0.400948	46	57.9446	-1.76114	56	52.399	0.481202	0	56	55.8947	0.0140755	54	53.8076	0.0261867	76	56.9809	2.18164	41	49.3057	-1.29714
1341	0	66	55.505	1.29184	44	46.658	-0.400709	57	55.6885	0.173714	44	45.1592	-0.174755	0	65	56.5161	1.0523	50	50.6379	-0.090215	60	57.4523	0.328903	51	51.9737	-0.13635	0	63	55.421	0.954866	45	53.3845	-1.24988	55	56.4946	-0.201528	44	48.9045	-0.739378
1342	0	60	55.0194	0.64299	40	46.2614	-0.990006	59	55.2055	0.493999	33	44.7666	-2.0483	0	60	56.0272	0.512885	47	50.2263	-0.470602	44	56.9648	-1.95452	49	51.5526	-0.364654	0	53	54.9519	-0.268119	63	52.9656	1.26422	54	56.013	-0.27394	36	48.5072	-2.08454
1343	0	54	54.5385	-0.0732793	38	45.8686	-1.27646	58	54.7273	0.429731	42	44.3779	-0.366921	0	46	55.543	-1.40704	41	49.8187	-1.37725	64	56.4821	0.93974	41	51.1355	-1.5829	0	63	54.4875	1.07248	45	52.5508	-1.1256	51	55.5362	-0.635201	34	48.1139	-2.42052
1344	0	55	54.0622	0.126452	44	45.4798	-0.223085	67	54.2537	1.55721	42	43.9931	-0.307547	0	52	55.0635	-0.424828	51	49.4151	0.221926	45	56.004	-1.64038	70	50.7225	2.30411	0	56	54.0276	0.263578	52	52.1401	-0.0194218	68	55.0641	1.56871	59	47.7246	1.46793
1345	0	56	53.5905	0.321979	37	45.0948	-1.33077	52	53.7847	-0.247492	49	43.6122	0.769687	0	54	54.5885	-0.0800916	49	49.0155	-0.00221797	64	55.5306	1.05867	56	50.3134	0.7599	0	60	53.5721	0.829833	52	51.7334	0.0369731	55	54.5967	0.0543868	63	47.3391	1.97309
1346	0	64	53.1234	1.35957	52	44.7136	1.01044	58	53.3203	0.614479	41	43.2351	-0.349058	0	47	54.1182	-1.03829	50	48.6198	0.195183	64	55.0618	1.11727	55	49.9083	0.686558	0	55	53.1212	0.253341	52	51.3307	0.0928126	52	54.1338	-0.295902	61	46.9575	1.79797
1347	0	50	52.6608	-0.376294	46	44.3362	0.245321	45	52.8604	-1.17176	57	42.8617	1.87266	0	46	53.6523	-1.12827	55	48.2281	0.913127	59	54.5975	0.573151	62	49.5072	1.58659	0	65	52.6746	1.52878	53	50.932	0.28406	69	53.6754	1.84486	51	46.5796	0.618979
1348	0	47	52.2027	-0.758885	52	43.9624	1.11461	54	52.4049	0.217058	48	42.4921	0.795002	0	53	53.191	-0.0262304	61	47.8401	1.68495	53	54.1378	-0.156289	49	49.1099	-0.0157013	0	51	52.2324	-0.172571	40	50.5372	-1.66608	70	53.2216	2.0054	52	46.2055	0.803548
1349	0	56	51.7489	0.568071	51	43.5924	1.03727	43	51.954	-1.36547	46	42.1261	0.571173	0	56	52.734	0.436436	58	47.456	1.3845	65	53.6825	1.40376	53	48.7165	0.588388	0	54	51.7945	0.300129	72	50.1463	2.57548	66	52.7722	1.62822	48	45.8352	0.312465
1350	0	40	51.2996	-1.78662	41	43.2261	-0.347654	43	51.5074	-1.29736	35	41.7638	-1.14329	0	69	52.2814	2.01268	51	47.0756	0.549521	47	53.2317	-0.908979	41	48.3268	-1.14426	0	48	51.3609	-0.485104	55	49.7593	0.706663	57	52.3273	0.618915	52	45.4685	0.905754
1351	0	43	50.8546	-1.19782	42	42.8633	-0.133214	53	51.0651	0.265779	42	41.4051	0.0917877	0	55	51.8332	0.427008	46	46.699	-0.103063	46	52.7852	-1.00042	45	47.941	-0.438412	0	60	50.9315	1.17074	60	49.376	1.37156	55	51.8867	0.419797	37	45.1055	-1.33254
1352	0	57	50.4139	0.872351	45	42.5042	0.372059	56	50.6271	0.717978	42	41.05	0.14658	0	62	51.3893	1.34756	54	46.3261	1.04429	59	52.343	0.866667	63	47.5588	1.94541	0	60	50.5063	1.22563	44	48.9965	-0.753248	57	51.4504	0.735057	57	44.7461	1.62307
1353	0	55	49.9774	0.677241	36	42.1485	-1.02475	62	50.1934	1.49944	42	40.6985	0.200826	0	42	50.9496	-1.38096	44	45.9568	-0.294998	57	51.9051	0.674831	55	47.1804	1.0544	0	49	50.0853	-0.155037	47	48.6207	-0.236403	43	51.0185	-1.2228	46	44.3903	0.23734
1354	0	43	49.5452	-0.998133	56	41.7964	1.89804	42	49.764	-1.198	30	40.3505	-1.88973	0	52	50.5142	0.206047	38	45.5911	-1.23145	55	51.4715	0.47578	42	46.8055	-0.741512	0	64	49.6683	1.79146	42	48.2486	-0.964181	49	50.5907	-0.227243	49	44.038	0.708857
1355	0	54	49.1171	0.664477	40	41.4477	-0.228908	60	49.3386	1.37638	32	40.0059	-1.41525	0	56	50.0829	0.790708	41	45.2291	-0.66047	48	51.0421	-0.43909	52	46.4344	0.771816	0	44	49.2554	-0.792284	52	47.8802	0.571318	57	50.1671	0.905033	48	43.6892	0.622208
1356	0	41	48.6932	-1.20147	43	41.1025	0.289363	54	48.9175	0.691646	37	39.6647	-0.438079	0	48	49.6557	-0.238984	47	44.8705	0.310614	52	50.6169	0.191808	42	46.0667	-0.627512	0	56	48.8466	0.95592	49	47.5153	0.212094	57	49.7478	0.960584	38	43.3439	-0.866896
1357	0	59	48.2733	1.3965	44	40.7607	0.488343	40	48.5004	-1.34403	33	39.327	-1.10139	0	52	49.2327	0.383761	36	44.5155	-1.41925	43	50.1957	-1.09734	53	45.7027	1.00236	0	46	48.4417	-0.360003	29	47.1541	-3.37113	57	49.3325	1.01559	38	43.002	-0.811434
1358	0	48	47.8575	0.0205739	56	40.4222	2.08167	43	48.0873	-0.77581	31	38.9926	-1.43552	0	43	48.8136	-0.886572	37	44.164	-1.17775	62	49.7787	1.55211	46	45.3421	0.0970012	0	60	48.0407	1.54394	45	46.7964	-0.267788	57	48.9213	1.07006	36	42.6635	-1.11059
1359	0	49	47.4456	0.222051	46	40.0871	0.871808	40	47.6783	-1.21405	32	38.6616	-1.17761	0	46	48.3986	-0.35366	59	43.8159	1.9768	54	49.3657	0.630652	43	44.985	-0.302712	0	45	47.6437	-0.394094	43	46.4422	-0.524926	49	48.5141	0.0694199	41	42.3284	-0.207463
1360	0	48	47.0378	0.138884	40	39.7553	0.0386943	44	47.2732	-0.493459	29	38.3338	-1.73324	0	56	47.9876	1.0707	48	43.4712	0.653678	49	48.9567	0.0061918	40	44.6314	-0.732282	0	43	47.2505	-0.648191	54	46.0914	1.07622	53	48.1109	0.671575	39	41.9966	-0.479843
1361	0	32	46.6339	-2.58692	43	39.4267	0.544922	43	46.8721	-0.59049	33	38.0093	-0.872009	0	51	47.5805	0.478828	32	43.1299	-1.9675	50	48.5516	0.204833	38	44.2811	-1.01893	0	52	46.8611	0.712636	35	45.7441	-1.81609	49	47.7116	0.184056	45	41.6681	0.496687
1362	0	57	46.2338	1.42602	39	39.1014	-0.0162319	43	46.4749	-0.529911	35	37.688	-0.454363	0	48	47.1773	0.118751	46	42.7919	0.473013	54	48.1505	0.796018	36	43.9342	-1.32237	0	45	46.4755	-0.219957	46	45.4002	0.0884323	43	47.3163	-0.658225	40	41.3429	-0.212329
1363	0	49	45.8376	0.451771	39	38.7792	0.0353524	45	46.0815	-0.161217	32	37.37	-0.949289	0	52	46.7779	0.724175	38	42.4572	-0.723051	54	47.7532	0.850077	42	43.5907	-0.245446	0	45	46.0937	-0.163036	53	45.0597	1.09069	44	46.9248	-0.44093	48	41.0209	1.00735
1364	0	33	45.4452	-2.16643	28	38.4603	-1.9768	44	45.6919	-0.255064	27	37.0551	-1.9351	0	51	46.3824	0.646601	46	42.1258	0.571224	61	47.3598	1.74644	51	43.2504	1.08516	0	38	45.7156	-1.25163	57	44.7225	1.6262	58	46.5372	1.50514	54	40.7021	1.80962
1365	0	42	45.0566	-0.471644	39	38.1444	0.137005	55	45.3061	1.30712	44	36.7433	1.09399	0	49	45.9906	0.429918	42	41.7976	0.0312328	51	46.9703	0.564278	42	42.9134	-0.140947	0	50	45.3411	0.658871	30	44.3886	-2.62698	47	46.1533	0.123501	38	40.3864	-0.387127
1366	0	55	44.6717	1.39267	32	37.8317	-1.0309	57	44.9241	1.5995	43	36.4346	1.00121	0	45	45.6025	-0.0898207	37	41.4726	-0.735293	38	46.5844	-1.39258	35	42.5797	-1.2812	0	45	44.9703	0.00443556	42	44.0579	-0.317542	41	45.7732	-0.745453	41	40.0739	0.144635
1367	0	42	44.2905	-0.353438	39	37.522	0.236673	41	44.5457	-0.553746	32	36.129	-0.72992	0	46	45.2182	0.115269	62	41.1508	2.64785	49	46.2023	0.399668	38	42.2492	-0.689304	0	51	44.603	0.895758	57	43.7305	1.75759	43	45.3969	-0.365517	38	39.7645	-0.286234
1368	0	45	43.913	0.162038	39	37.2153	0.285774	34	44.171	-1.74431	32	35.8265	-0.676434	0	35	44.8375	-1.66285	47	40.8321	0.899675	60	45.8239	1.83012	36	41.9218	-0.986963	0	50	44.2393	0.814681	30	43.4063	-2.44764	40	45.0242	-0.79439	43	39.4581	0.540133
1369	0	51	43.5391	1.04473	46	36.9117	1.34	43	43.8	-0.121992	31	35.5269	-0.813061	0	34	44.4605	-1.79396	32	40.5166	-1.50553	53	45.4492	1.03718	40	41.5975	-0.252595	0	50	43.8792	0.865615	49	43.0852	0.84497	43	44.6551	-0.252403	37	39.1548	-0.354246
1370	0	47	43.1688	0.558836	31	36.611	-1.00777	41	43.4325	-0.379891	40	35.2304	0.754148	0	33	44.0871	-1.93001	36	40.2041	-0.700682	49	45.0781	0.560277	48	41.2764	0.970464	0	50	43.5225	0.916055	50	42.7673	1.02286	43	44.2897	-0.196674	54	38.8545	2.06105
1371	0	42	42.8021	-0.123761	40	36.3133	0.582912	36	43.0686	-1.1781	28	34.9367	-1.31092	0	53	43.7172	1.27509	31	39.8947	-1.59753	49	44.7105	0.612782	38	40.9584	-0.479913	0	45	43.1693	0.272904	45	42.4525	0.379764	34	43.9278	-1.7026	33	38.5571	-0.967374
1372	0	47	42.4388	0.665315	35	36.0185	-0.172167	47	42.7082	0.626023	33	34.646	-0.286531	0	43	43.3508	-0.0534999	25	39.5882	-2.91765	39	44.3465	-0.856131	35	40.6434	-0.953906	0	41	42.8195	-0.28416	38	42.1407	-0.671713	47	43.5695	0.500394	43	38.2627	0.722425
1373	0	45	42.0791	0.435425	26	35.7266	-1.90755	40	42.3513	-0.371774	28	34.3582	-1.20158	0	48	42.988	0.723426	37	39.2848	-0.375618	44	43.9861	0.00210022	45	40.3314	0.695954	0	37	42.4731	-0.899772	34	41.832	-1.34318	48	43.2146	0.690707	35	37.9713	-0.502236
1374	0	55	41.7228	1.7903	23	35.4376	-2.59342	41	41.9979	-0.155839	36	34.0732	0.321138	0	50	42.6285	1.04248	39	38.9843	0.00251239	44	43.6291	0.0559186	49	40.0224	1.28251	0	51	42.13	1.24204	67	41.5263	3.11211	49	42.8633	0.876676	42	37.6827	0.666178
1375	0	33	41.3699	-1.45701	58	35.1514	3.00017	33	41.6478	-1.5054	34	33.791	0.0358399	0	37	42.2726	-0.866802	41	38.6867	0.36127	44	43.2755	0.109217	46	39.7164	0.926472	0	43	41.7903	0.184477	45	41.2236	0.562953	46	42.5153	0.513786	38	37.3969	0.0978301
1376	0	47	41.0204	0.872214	42	34.868	1.1005	55	41.3012	1.84715	30	33.5117	-0.64114	0	35	41.92	-1.16969	28	38.3921	-1.96392	41	42.9254	-0.300697	52	39.4132	1.74547	0	34	41.4538	-1.27832	37	40.9238	-0.645073	43	42.1708	0.126453	43	37.114	0.897603
1377	0	40	40.6743	-0.106608	38	34.5873	0.553609	42	40.9579	0.160798	28	33.2351	-0.989338	0	44	41.5707	0.366231	31	38.1003	-1.27525	33	42.5786	-1.66743	43	39.113	0.592757	0	39	41.1206	-0.339573	41	40.627	0.058256	55	41.8296	1.7759	26	36.8339	-2.12471
1378	0	40	40.3314	-0.052401	27	34.3094	-1.4067	37	40.618	-0.594787	36	32.9612	0.50646	0	40	41.2248	-0.193654	39	37.8113	0.190343	39	42.2352	-0.518053	51	38.8157	1.70615	0	42	40.7906	0.186607	38	40.333	-0.378466	46	41.4918	0.664704	31	36.5566	-0.997989
1379	0	38	39.9919	-0.323123	32	34.0342	-0.359607	46	40.2813	0.843181	31	32.6901	-0.303553	0	41	40.8821	0.0184077	52	37.5251	2.0073	47	41.8951	0.74462	43	38.5212	0.683013	0	41	40.4638	0.0837346	38	40.0419	-0.331243	42	41.1572	0.130046	42	36.282	0.882311
1380	0	42	39.6556	0.361754	31	33.7617	-0.496024	46	39.9478	0.892343	34	32.4217	0.270682	0	41	40.5427	0.0714102	44	37.2418	1.01884	50	41.5583	1.19383	39	38.2295	0.123381	0	38	40.1402	-0.347184	42	39.7537	0.346619	47	40.8259	0.900584	38	36.0101	0.322807
1381	0	41	39.3225	0.261985	33	33.4919	-0.0856317	53	39.6176	1.83821	32	32.1559	-0.0275566	0	36	40.2066	-0.701099	37	36.9612	0.00638609	40	41.2248	-0.19365	38	37.9406	0.00963945	0	45	39.8197	0.772241	37	39.4682	-0.405768	52	40.4978	1.59506	33	35.7409	-0.477128
1382	0	47	38.9926	1.168	32	33.2247	-0.216503	26	39.2906	-2.6065	29	31.8927	-0.537167	0	38	39.8736	-0.303942	32	36.6833	-0.82789	50	40.8944	1.28773	31	37.6544	-1.19517	0	40	39.5022	0.0787065	46	39.1855	1.00474	39	40.173	-0.187827	34	35.4744	-0.252849
1383	0	37	38.6658	-0.273864	31	32.9601	-0.352051	32	38.9667	-1.23156	31	31.6322	-0.113544	0	41	39.5438	0.227417	34	36.4081	-0.412977	42	40.5672	0.221083	41	37.371	0.566755	0	51	39.1878	1.65403	48	38.9056	1.31267	32	39.8513	-1.38792	40	35.2105	0.757295
1384	0	37	38.3422	-0.220662	33	32.6981	0.0525492	29	38.646	-1.79122	37	31.3742	0.924873	0	37	39.2171	-0.364497	49	36.1355	1.83778	43	40.2432	0.420409	33	37.0903	-0.712026	0	42	38.8765	0.48197	42	38.6283	0.520258	31	39.5327	-1.53252	21	34.9491	-3.04395
1385	0	44	38.0217	0.901261	34	32.4387	0.267764	32	38.3284	-1.11871	32	31.1188	0.155774	0	30	38.8936	-1.62374	37	35.8656	0.18649	43	39.9223	0.469346	33	36.8122	-0.663625	0	40	38.5681	0.2264	28	38.3538	-1.95669	34	39.2172	-0.894752	37	34.6904	0.379692
1386	0	31	37.7043	-1.20412	26	32.1818	-1.21234	41	38.0138	0.466364	41	30.8659	1.58268	0	50	38.5731	1.61601	35	35.5984	-0.10114	47	39.6045	1.07875	40	36.5368	0.547574	0	37	38.2627	-0.207593	38	38.082	-0.0132961	39	38.9049	0.0152344	33	34.4343	-0.249672
1387	0	37	37.3898	-0.0640892	34	31.9274	0.355457	55	37.7023	2.33242	26	30.6155	-0.90518	0	38	38.2556	-0.0414638	49	35.3337	1.95233	41	39.2897	0.2671	50	36.2641	1.94256	0	28	37.9603	-1.88232	45	37.8127	1.07141	32	38.5955	-1.16593	32	34.1806	-0.385483
1388	2	45	37.0784	1.18088	23	31.6754	-1.80895	43	37.3937	0.854945	36	30.3676	0.938729	0	33	37.9411	-0.860143	35	35.0716	-0.0120945	31	38.978	-1.43289	33	35.9939	-0.521169	0	39	37.6608	0.214452	42	37.5461	0.687247	54	38.2892	2.13797	41	33.9295	1.10423
1389	0	40	36.77	0.510711	36	31.4259	0.762345	35	37.0882	-0.352969	25	30.1222	-1.02443	0	37	37.6297	-0.103517	36	34.812	0.198005	42	38.6693	0.513942	38	35.7263	0.368846	0	45	37.3641	1.13829	45	37.2821	1.15051	38	37.9858	0.00230017	24	33.6808	-1.97609
1390	0	44	36.4645	1.13602	30	31.1789	-0.215233	34	36.7856	-0.477724	31	29.8791	0.201314	0	35	37.3211	-0.392345	40	34.5549	0.860945	36	38.3635	-0.393921	40	35.4612	0.717644	0	32	37.0703	-0.896307	37	37.0207	-0.00339467	42	37.6854	0.665755	40	33.4346	1.03808
1391	1	43	36.1619	1.0428	31	30.9342	0.0118104	31	36.4859	-0.985295	31	29.6385	0.244532	0	40	37.0155	0.471884	40	34.3003	0.901197	47	38.0607	1.30393	32	35.1987	-0.565452	0	37	36.7793	0.0362834	44	36.7617	1.09121	32	37.3879	-0.952461	38	33.1908	0.780148
1392	0	39	35.9579	0.487125	35	30.8836	0.695792	41	36.3861	0.720567	41	29.609	1.77897	0	48	36.7128	1.62916	28	34.0482	-1.143	36	37.7608	-0.293469	36	34.9386	0.176895	0	44	36.4911	1.13201	40	36.5053	0.552559	41	37.0934	0.610117	40	32.9495	1.11479
1393	0	36	35.8216	0.0297248	36	30.7065	0.882252	28	36.1551	-1.54116	30	29.4237	0.105224	0	31	36.413	-0.972201	47	33.7985	1.92563	34	37.4638	-0.594035	37	34.6811	0.381231	1	41	36.2057	0.748748	43	36.2514	1.02916	50	36.8016	1.86653	48	32.7105	2.20685
1394	1	41	35.5249	0.855072	18	30.466	-2.93826	43	35.8611	1.08867	34	29.1871	0.825413	0	52	36.116	2.20272	40	33.5513	1.01963	42	37.1696	0.745343	36	34.4259	0.262345	0	39	35.923	0.492716	33	35.9999	-0.522217	35	36.5127	-0.255699	43	32.4738	1.60523
1395	0	35	35.2764	-0.0467152	26	30.3189	-0.846997	29	35.6636	-1.2374	36	29.052	1.15801	0	38	35.8218	0.353354	32	33.3064	-0.230941	33	36.8783	-0.675124	36	34.1732	0.304462	1	33	35.643	-0.460089	32	35.7509	-0.663067	37	36.2266	0.127137	35	32.2395	0.466606
1396	1	27	35.0615	-1.55144	34	30.1128	0.666646	30	35.4051	-0.986838	41	28.844	1.89844	0	35	35.5304	-0.0896481	33	33.0639	-0.0111222	39	36.5898	0.385948	32	33.9229	-0.339927	0	42	35.3657	1.02369	40	35.5042	0.710841	34	35.9434	-0.333281	28	32.0075	-0.757351
1397	0	56	34.7718	2.83674	33	29.8779	0.543491	34	35.1183	-0.191778	25	28.6129	-0.722586	0	37	35.2417	0.289062	38	32.8237	0.839702	31	36.304	-0.952625	42	33.675	1.28458	1	41	35.0911	0.922817	33	35.26	-0.393417	37	35.6628	0.219834	25	31.7778	-1.35556
1398	0	35	34.5303	0.0793847	23	29.7363	-1.40461	44	34.9277	1.3677	41	28.4833	1.95478	0	27	34.9558	-1.53109	38	32.5859	0.878285	23	36.021	-2.71506	27	33.4294	-1.23734	0	26	34.8191	-1.72957	42	35.0181	1.07733	49	35.385	1.945	33	31.5504	0.252352
1399	0	41	34.3224	1.04286	26	29.5357	-0.693408	36	34.6762	0.220632	28	28.2808	-0.053059	0	29	34.6725	-1.05336	38	32.3503	0.916496	33	35.7407	-0.477088	42	33.1861	1.36001	0	36	34.5898	0.23503	28	34.8429	-1.29319	26	35.1517	-1.7948	30	31.3853	-0.252918
1400	0	28	34.0851	-1.14998	29	29.3972	-0.0737606	37	34.4898	0.412678	29	28.1542	0.157061	0	41	34.392	1.032	32	32.1171	-0.0206938	50	35.4631	2.05584	35	32.9452	0.347325	0	31	34.3737	-0.605929	37	34.6325	0.389215	46	34.9288	1.63236	40	31.1931	1.39248
1401	0	39	33.8813	0.819648	36	29.1997	1.13338	31	34.2423	-0.582341	24	27.9547	-0.807251	0	41	34.1141	1.0754	30	31.886	-0.344342	46	35.1881	1.59413	45	32.7065	1.8326	0	30	34.1486	-0.757423	47	34.4609	1.82902	32	34.6999	-0.477282	31	31.0315	-0.00565069
1402	0	41	33.6026	1.15529	25	28.9733	-0.794653	30	33.9663	-0.724153	29	27.732	0.235465	0	30	33.8388	-0.700863	28	31.6572	-0.691153	34	34.9158	-0.157056	36	32.4701	0.588312	0	40	33.9365	0.958716	41	34.254	1.05355	33	34.4813	-0.257865	36	30.8427	0.859557
1403	0	37	33.3265	0.603923	39	28.749	1.64147	37	33.693	0.543664	27	27.5115	-0.0984319	0	34	33.5661	0.0744137	30	31.4306	-0.261199	31	34.6461	-0.654857	45	32.236	1.90275	0	46	33.7155	1.81125	42	34.0859	1.22117	33	34.2567	-0.218759	36	30.6843	0.885955
1404	0	31	33.053	-0.368737	29	28.5269	0.0878437	31	33.4223	-0.435063	39	27.2931	1.8746	0	32	33.296	-0.229099	38	31.2062	1.10209	36	34.379	0.27017	38	32.004	0.972679	0	36	33.5076	0.415407	32	33.8825	-0.332788	46	34.0423	1.76307	27	30.4987	-0.673332
1405	1	36	32.7822	0.536297	29	28.3071	0.128678	28	33.1542	-0.974062	36	27.077	1.48717	0	39	33.0284	0.956219	39	30.984	1.28359	39	34.1144	0.782318	26	31.7742	-1.13242	0	29	33.2504	-0.789282	30	33.6536	-0.667045	35	33.7799	0.206226	33	30.2834	0.472894
1406	0	29	32.514	-0.652528	32	28.0893	0.691321	32	32.8888	-0.157112	37	26.863	1.66652	0	30	32.7634	-0.50452	31	30.7639	0.0424071	44	33.8524	1.52981	30	31.5466	-0.282379	1	34	32.9957	0.17223	44	33.4268	1.59397	31	33.5202	-0.452633	46	30.0702	2.34871
1407	0	35	32.2483	0.465124	36	27.8737	1.35439	33	32.6258	0.0651344	18	26.6511	-2.03908	0	33	32.5008	0.0868967	32	30.5459	0.257051	36	33.5929	0.401182	38	31.3212	1.08344	0	40	32.7435	1.14736	38	33.2022	0.778303	29	33.2629	-0.791596	29	29.8592	-0.159542
1408	1	32	31.9851	0.00262794	38	27.6601	1.67735	37	32.3654	0.761918	25	26.4413	-0.288254	0	26	32.2407	-1.22391	32	30.33	0.295214	38	33.3359	0.756619	33	31.0979	0.331111	0	35	32.4937	0.423651	31	32.9798	-0.355587	37	33.0081	0.656266	32	29.6502	0.415398
1409	0	36	31.77	0.705008	26	27.5397	-0.301967	38	32.2011	0.940699	33	26.3327	1.16062	0	37	31.9831	0.824771	41	30.1162	1.69976	28	33.0813	-0.960282	25	30.8767	-1.17534	0	42	32.2462	1.50504	29	32.7596	-0.698136	31	32.7558	-0.315347	35	29.4432	0.939269
1410	0	32	31.5881	0.0728193	28	27.3602	0.120918	31	31.9756	-0.175226	23	26.1511	-0.657044	0	33	31.7279	0.221442	45	29.9045	2.25031	34	32.8292	0.200788	31	30.6576	0.0614968	0	37	32.0011	0.821813	34	32.5414	0.250138	35	32.5059	0.421578	28	29.2383	-0.234016
1411	0	34	31.3311	0.45772	33	27.1514	1.01811	25	31.7213	-1.34427	28	25.946	0.388169	0	36	31.4751	0.754147	20	29.6947	-2.16781	32	32.5795	-0.102445	24	30.4406	-1.31467	0	25	31.7584	-1.35167	49	32.3254	2.38208	31	32.2585	-0.226028	28	29.0354	-0.195673
1412	0	35	31.1219	0.655511	34	27.0358	1.19436	33	31.5631	0.250136	25	25.8422	-0.16843	0	40	31.2247	1.3875	28	29.487	-0.281021	35	32.3322	0.45094	27	30.2256	-0.62076	0	31	31.5581	-0.100228	31	32.1759	-0.211191	34	32.0553	0.333512	26	28.8947	-0.567691
1413	0	34	30.9461	0.523743	22	26.8609	-1.03634	42	31.3435	1.64433	34	25.6651	1.42942	0	34	30.9766	0.518504	36	29.2813	1.11978	38	32.0873	0.959174	29	30.0126	-0.188034	0	43	31.3706	1.77347	35	31.9908	0.508652	38	31.8622	0.995684	23	28.7266	-1.19408
1414	0	48	30.695	2.49776	34	26.6568	1.25935	27	31.0952	-0.78812	17	25.4647	-2.05298	1	27	30.7309	-0.718012	23	29.0776	-1.26726	27	31.8447	-0.932355	27	29.8016	-0.539174	0	26	31.1337	-1.00681	38	31.7799	1.00903	27	31.6209	-0.889294	31	28.5286	0.443876
1415	0	34	30.4464	0.609444	38	26.4547	1.8729	38	30.8492	1.16001	21	25.2662	-0.930959	0	31	30.4875	0.092052	27	28.8758	-0.361	32	31.6044	0.0699368	23	29.5927	-1.37466	0	31	30.8991	0.0181137	33	31.5711	0.248734	44	31.3819	1.90224	36	28.3326	1.27791
1416	0	32	30.2001	0.318186	24	26.2545	-0.460209	35	30.6056	0.742782	24	25.0697	-0.218348	0	29	30.2463	-0.23144	37	28.676	1.36846	25	31.3664	-1.27328	29	29.3856	-0.0716142	0	41	30.6668	1.61377	28	31.3643	-0.6358	41	31.1453	1.53904	24	28.1384	-0.844752
1417	0	32	29.9561	0.361309	30	26.0564	0.720004	21	30.3644	-2.04348	27	24.8751	0.408933	0	31	30.0075	0.178263	26	28.4781	-0.485987	32	31.1307	0.153673	24	29.1806	-1.05749	0	37	30.4367	1.07901	37	31.1595	0.960165	32	30.911	0.192515	27	27.9462	-0.182097
1418	0	32	29.7145	0.404021	35	25.8601	1.54492	22	30.1255	-1.73236	28	24.6825	0.62695	0	35	29.7708	0.883888	33	28.282	0.821292	21	30.8972	-2.15976	24	28.9775	-1.01602	0	29	30.2087	-0.224453	35	30.9567	0.683438	41	30.6789	1.61189	38	27.7559	1.66182
1419	0	27	29.4752	-0.476351	34	25.6658	1.4293	25	29.8889	-0.977776	27	24.4918	0.482708	0	29	29.5761	-0.106973	35	28.1414	1.15932	32	30.7123	0.227635	29	28.829	0.0317563	0	22	29.9829	-1.70197	34	30.7559	0.556365	29	30.4491	-0.269085	46	27.5674	2.71773
1420	0	34	29.2382	0.816649	29	25.4734	0.65488	41	29.6546	1.77186	30	24.3029	1.04014	0	29	29.3923	-0.0728496	25	27.984	-0.596802	28	30.5255	-0.477267	30	28.6658	0.243587	0	39	29.7593	1.47969	34	30.5569	0.590481	36	30.2215	0.96309	30	27.3808	0.478194
1421	0	32	29.0034	0.529733	15	25.2828	-2.65501	28	29.4225	-0.268823	29	24.116	0.906938	1	30	29.1613	0.153119	33	27.7926	0.906497	33	30.2977	0.470414	31	28.4674	0.454876	0	33	29.5378	0.602691	37	30.3599	1.09162	25	29.9961	-0.999212	28	27.1961	0.151931
1422	0	33	28.7708	0.736203	31	25.0941	1.06073	37	29.1926	1.28352	24	23.9309	0.0141072	0	37	28.9325	1.32628	38	27.603	1.68662	30	30.0721	-0.0131601	30	28.2708	0.315715	0	30	29.3184	0.124442	33	30.1648	0.493543	30	29.7728	0.0414742	24	27.0131	-0.615048
1423	0	36	28.5405	1.24325	25	24.9072	0.0185562	23	28.965	-1.24379	29	23.7476	0.975343	0	32	28.7059	0.582326	33	27.4152	0.972194	20	29.8486	-2.20222	21	28.076	-1.54411	0	39	29.1011	1.58509	25	29.9716	-0.994316	25	29.5518	-0.910355	29	26.832	0.402595
1424	0	32	28.3124	0.651888	20	24.7222	-1.05591	25	28.7396	-0.747918	27	23.5662	0.660842	0	31	28.4813	0.452367	28	27.2292	0.145671	35	29.6273	0.908147	30	27.8831	0.386492	0	35	28.8858	1.03348	37	29.7802	1.18693	30	29.3329	0.121805	31	26.6526	0.780819
1425	0	32	28.0864	0.691834	27	24.5389	0.473637	35	28.5163	1.09594	18	23.3865	-1.26961	0	38	28.2589	1.58021	24	27.045	-0.621553	40	29.4081	1.67472	23	27.692	-0.978348	0	31	28.6726	0.418009	36	29.5907	1.06822	37	29.116	1.29611	27	26.475	0.101041
1426	0	34	27.8626	1.05256	24	24.3574	-0.0729623	24	28.2952	-0.876758	24	23.2086	0.161538	0	41	28.0782	2.01805	32	26.916	0.89873	22	29.2373	-1.543	27	27.5554	-0.10689	0	29	28.4614	0.100008	23	29.403	-1.33511	27	28.9013	-0.36591	27	26.2991	0.134887
1427	0	30	27.6409	0.430713	25	24.1777	0.164454	27	28.0762	-0.207121	21	23.0325	-0.443529	0	30	27.9083	0.381883	24	26.7702	-0.565471	31	29.0645	0.347635	28	27.404	0.112625	0	32	28.2523	0.662514	39	29.2171	1.56652	34	28.6887	0.910883	22	26.125	-0.879446
1428	0	32	27.4213	0.809407	27	23.9998	0.577394	28	27.8594	0.0265789	30	22.8581	1.30392	0	22	27.6912	-1.21336	27	26.5903	0.0788546	39	28.8505	1.62522	25	27.2173	-0.443452	0	29	28.045	0.17733	29	29.0329	-0.00611856	41	28.4781	1.95559	25	25.9525	-0.190508
1429	0	21	27.2038	-1.35378	27	23.8235	0.61131	26	27.6446	-0.322526	26	22.6855	0.650032	0	27	27.476	-0.0916088	33	26.412	1.14682	38	28.6386	1.51861	23	27.0322	-0.840778	0	22	27.8398	-1.24505	28	28.8506	-0.160749	26	28.2695	-0.445095	24	25.7818	-0.363709
1430	0	23	26.9884	-0.831634	37	23.649	2.19489	28	27.4318	0.107372	23	22.5145	0.101227	0	24	27.2629	-0.666033	30	26.2355	0.687306	23	28.4288	-1.13198	26	26.8489	-0.166491	0	30	27.6365	0.431511	27	28.67	-0.321394	25	28.063	-0.612603	32	25.6127	1.12912
1431	0	31	26.775	0.758834	26	23.4762	0.494959	44	27.2212	2.5295	21	22.3453	-0.293564	0	29	27.0517	0.361781	32	26.0606	1.04994	37	28.2209	1.44327	33	26.6674	1.10237	0	26	27.4352	-0.281455	37	28.4912	1.39885	25	27.8585	-0.571694	14	25.4453	-3.0589
1432	1	24	26.5636	-0.523299	24	23.3051	0.141857	24	27.0125	-0.614926	27	22.1777	0.928052	0	35	26.8426	1.37885	39	25.8874	2.09969	31	28.015	0.536115	24	26.4875	-0.50776	0	22	27.2357	-1.11625	23	28.314	-1.10805	30	27.6559	0.427972	39	25.2796	2.19703
1433	0	28	26.3543	0.311012	17	23.1356	-1.48809	22	26.8059	-1.02461	15	22.0118	-1.81043	0	27	26.6354	0.0701697	29	25.7159	0.609837	27	27.8111	-0.156101	23	26.3093	-0.690043	0	20	27.0381	-1.57377	30	28.1386	0.339849	31	27.4553	0.636649	25	25.1154	-0.0230881
1434	0	33	26.1469	1.19297	17	22.9677	-1.44738	30	26.6012	0.620533	10	21.8475	-3.7465	0	26	26.4301	-0.0843551	28	25.5461	0.463753	33	27.6092	0.938425	27	26.1328	0.166888	0	25	26.8424	-0.368478	30	27.9648	0.371572	30	27.2566	0.500872	31	24.9529	1.08609
1435	0	22	25.9415	-0.840334	29	22.8015	1.15103	33	26.3985	1.14917	20	21.6848	-0.376738	0	30	26.2268	0.688891	27	25.3778	0.312194	21	27.4091	-1.39858	23	25.958	-0.61678	0	31	26.6485	0.781548	33	27.7927	0.90647	18	27.0598	-2.13543	24	24.792	-0.161662
1436	0	21	25.7835	-1.04385	32	22.7279	1.63909	28	26.2913	0.322906	27	21.6229	1.03482	0	29	26.0253	0.552379	30	25.2111	0.874321	33	27.211	1.00774	28	25.7848	0.418641	0	28	26.4565	0.291695	31	27.6223	0.606655	32	26.865	0.907752	15	24.6326	-2.48713
1437	1	20	25.6583	-1.26523	33	22.5947	1.81133	16	26.1224	-2.5306	23	21.4875	0.315383	0	32	25.8258	1.09146	33	25.0461	1.3846	32	27.0147	0.881276	36	25.6132	1.73114	0	26	26.2663	-0.0522205	33	27.4535	0.965525	22	26.672	-0.996072	29	24.4748	0.840303
1438	0	27	25.4574	0.296884	24	22.4319	0.320086	27	25.9241	0.207051	34	21.3281	2.17321	0	28	25.6281	0.448246	35	24.8826	1.71015	21	26.8204	-1.27011	15	25.4432	-2.69642	0	26	26.0779	-0.0152677	32	27.2863	0.833273	28	26.4809	0.287089	30	24.3186	1.03728
1439	0	20	25.2583	-1.1758	18	22.2707	-1.0066	25	25.7278	-0.145555	26	21.1704	0.947166	0	23	25.4323	-0.507161	24	24.7207	-0.147113	34	26.6279	1.26431	26	25.2748	0.142223	0	25	25.8912	-0.178241	21	27.1207	-1.33565	35	26.2916	1.47199	30	24.1639	1.06553
1440	1	24	25.0612	-0.216614	25	22.111	0.577805	32	25.5333	1.14316	36	21.0142	2.49764	0	17	25.2383	-1.99807	35	24.5603	1.76463	33	26.4372	1.14244	19	25.108	-1.40127	0	25	25.7063	-0.141264	38	26.9567	1.79146	23	26.1041	-0.647254	28	24.0106	0.753915
1441	0	27	24.9114	0.401956	16	22.0439	-1.51097	28	25.4343	0.484875	18	20.9587	-0.697372	0	29	25.0461	0.734231	31	24.4015	1.18513	25	26.2483	-0.249663	35	24.9427	1.69999	0	32	25.5232	1.14495	32	26.7943	0.920249	29	25.9185	0.572227	20	23.859	-0.862887
1442	0	32	24.7942	1.27381	22	21.9171	0.0176774	28	25.2734	0.515279	27	20.8296	1.1875	0	20	24.8556	-1.08575	29	24.2442	0.883134	27	26.0613	0.180663	39	24.779	2.27718	0	26	25.3418	0.129093	30	26.6334	0.614652	30	25.7346	0.778753	24	23.7087	0.0594555
1443	0	15	24.6013	-2.47905	15	21.7606	-1.74558	20	25.0831	-1.13662	17	20.6765	-0.891686	0	16	24.667	-2.16675	28	24.0884	0.739231	28	25.876	0.401405	23	24.6168	-0.337137	0	29	25.162	0.712691	32	26.4741	0.976854	16	25.5525	-2.38812	16	23.56	-1.89
1444	0	22	24.4557	-0.523559	17	21.6967	-1.13911	26	24.9883	0.198418	21	20.6242	0.0820178	0	22	24.4801	-0.528767	25	23.934	0.213196	22	25.6924	-0.787231	11	24.4562	-4.0572	0	24	24.984	-0.200863	27	26.3163	0.131584	26	25.3722	0.123131	27	23.4127	0.690379
1445	0	20	24.3427	-0.971062	24	21.573	0.495401	28	24.8315	0.59879	21	20.4981	0.109523	0	24	24.295	-0.060219	29	23.7812	0.969115	19	25.5107	-1.49365	13	24.297	-3.13323	1	27	24.8077	0.421912	22	26.16	-0.886909	21	25.1935	-0.915106	29	23.2668	1.06462
1446	0	30	24.1539	1.06734	19	21.4197	-0.555111	20	24.6453	-1.03872	20	20.3481	-0.0778385	0	31	24.1116	1.23719	23	23.6298	-0.131312	25	25.3306	-0.0661251	22	24.1394	-0.456114	1	20	24.633	-1.03597	33	26.0052	1.21764	39	25.0166	2.23913	21	23.1224	-0.463146
1447	0	25	23.9669	0.206613	26	21.2678	0.92806	25	24.4609	0.10782	23	20.1996	0.583926	0	33	23.9299	1.5789	33	23.4798	1.65726	24	25.1523	-0.235211	23	23.9832	-0.205004	0	17	24.4599	-1.8093	20	25.8518	-1.30851	31	24.8415	1.10611	24	22.9794	0.208332
1448	0	30	23.7817	1.1353	11	21.1174	-3.05051	25	24.2783	0.144347	27	20.0526	1.33704	0	24	23.7499	0.0510474	31	23.3313	1.37735	19	24.9757	-1.37091	32	23.8284	1.44454	0	36	24.2885	1.95191	21	25.7	-1.02562	27	24.668	0.448802	22	22.8378	-0.178613
1449	0	19	23.5983	-1.05491	32	20.9685	1.95012	23	24.0974	-0.228822	26	19.907	1.19494	0	20	23.5716	-0.798634	17	23.1841	-1.49987	35	24.8007	1.72399	22	23.6751	-0.357138	0	26	24.1187	0.368949	23	25.5496	-0.531623	23	24.4961	-0.311962	14	22.6975	-2.32451
1450	0	19	23.4165	-1.01322	21	20.821	0.0390653	24	23.9183	0.0166869	22	19.7628	0.476968	0	18	23.3949	-1.2716	14	23.0384	-2.41562	23	24.6274	-0.33934	24	23.5233	0.0973149	0	23	23.9505	-0.198194	29	25.4006	0.668391	17	24.3259	-1.7768	22	22.5587	-0.119109
1451	1	24	23.2365	0.155845	24	20.6749	0.678728	28	23.7408	0.804906	15	19.6201	-1.19291	0	19	23.2199	-0.968117	16	22.8941	-1.72352	27	24.4558	0.489637	28	23.3728	0.874458	0	30	23.824	1.12758	32	25.3174	1.18133	28	24.1993	0.718273	28	22.4813	1.04293
1452	0	26	23.0582	0.57693	14	20.5303	-1.74529	26	23.5651	0.477518	12	19.4788	-2.15895	0	28	23.0465	0.936117	21	22.7511	-0.382123	36	24.2858	1.95237	22	23.2237	-0.260905	2	37	23.7497	2.17833	31	25.2624	1.03051	25	24.1238	0.175248	25	22.4362	0.512764
1453	1	25	22.8816	0.423677	23	20.387	0.544838	24	23.3911	0.124291	21	19.3389	0.362482	1	19	22.8748	-0.888931	25	22.6095	0.478099	22	24.1174	-0.451424	27	23.0761	0.755156	0	23	23.6359	-0.132596	31	25.1434	1.05188	14	24.007	-2.67449	21	22.3312	-0.290484
1454	0	22	22.7067	-0.150666	27	20.2452	1.29996	28	23.2188	0.903571	18	19.2004	-0.282932	0	24	22.7046	0.264425	25	22.4692	0.50615	26	23.9506	0.401927	23	22.9298	0.0146361	0	25	23.472	0.305602	27	24.998	0.385284	17	23.8413	-1.65927	31	22.1956	1.58132
1455	0	34	22.5789	1.95871	21	20.1958	0.175499	34	23.1416	1.86219	18	19.1624	-0.273981	0	27	22.536	0.859098	27	22.3303	0.898679	30	23.7854	1.13463	26	22.7849	0.630536	0	31	23.3096	1.38123	28	24.854	0.594538	36	23.6773	2.05379	24	22.0613	0.395734
1456	0	23	22.4835	0.107697	25	20.0865	0.982708	13	23.0025	-2.77418	27	19.0506	1.52986	0	28	22.369	1.06417	25	22.1927	0.561455	18	23.6217	-1.32505	13	22.6413	-2.67402	1	36	23.1488	2.14187	25	24.7114	0.0577263	21	23.5148	-0.548767	17	21.9284	-1.1953
1457	0	28	22.3576	1.06631	16	20.0383	-1.00958	19	22.9273	-0.900975	23	19.0139	0.831161	0	34	22.2035	2.02308	12	22.0564	-2.90304	19	23.4596	-1.02311	31	22.4991	1.52681	1	16	22.9894	-1.74735	24	24.5701	-0.116371	27	23.3538	0.701707	31	21.7967	1.65296
1458	0	23	22.2642	0.153427	21	19.9303	0.23342	29	22.79	1.15318	20	18.9033	0.24522	0	15	22.0792	-1.82784	22	21.9749	0.00534986	16	23.3454	-1.83634	22	22.4109	-0.0876005	0	22	22.9334	-0.19901	27	24.5935	0.463126	27	23.3007	0.711925	30	21.8191	1.49363
1459	1	25	22.0948	0.581047	20	19.7925	0.0464053	18	22.623	-1.08966	19	18.7687	0.0530661	1	27	21.9652	0.968946	27	21.8761	0.986095	26	23.2285	0.543535	27	22.3074	0.903085	0	15	22.9057	-2.04124	24	24.5229	-0.106742	23	23.2687	-0.056021	15	21.7683	-1.74757
1460	0	24	21.927	0.42316	20	19.6559	0.0769339	21	22.4577	-0.318106	17	18.6354	-0.396636	0	23	21.8033	0.249519	22	21.7426	0.054869	29	23.07	1.10117	28	22.1681	1.10212	0	37	22.7483	2.34296	21	24.3831	-0.738248	36	23.1099	2.14836	33	21.6379	1.9779
1461	0	25	21.7607	0.647855	19	19.5207	-0.119467	23	22.294	0.147206	16	18.5034	-0.625843	1	30	21.643	1.52577	29	21.6105	1.3722	22	22.9131	-0.194666	23	22.0301	0.202242	0	29	22.5924	1.18985	31	24.2446	1.21331	18	22.9526	-1.16733	29	21.5087	1.39111
1462	0	31	21.5961	1.689	18	19.3869	-0.326885	16	22.1319	-1.53297	23	18.3727	0.964861	0	32	21.4841	1.85896	29	21.4795	1.39652	27	22.7576	0.816452	28	21.8933	1.15405	1	21	22.4781	-0.322559	19	24.1717	-1.18648	14	22.8387	-2.36224	15	21.4409	-1.66303
1463	0	24	21.4784	0.514711	25	19.3453	1.13094	28	22.0649	1.12163	21	18.3425	0.57992	0	29	21.3268	1.42489	24	21.3498	0.540965	15	22.6036	-1.96324	23	21.7579	0.259003	1	18	22.416	-1.04086	25	24.127	0.174601	28	22.7758	0.987274	26	21.4053	0.901103
1464	0	27	21.3932	1.07903	23	19.2438	0.783218	24	21.9357	0.42137	19	18.2384	0.174731	1	22	21.2104	0.168334	22	21.2749	0.154603	19	22.4973	-0.802344	27	21.6764	1.02453	0	31	22.3141	1.56003	37	24.0182	2.1342	12	22.6716	-3.08064	23	21.3097	0.352461
1465	0	24	21.2318	0.565049	22	19.1124	0.615638	27	21.7768	1.0052	22	18.1101	0.829332	0	23	21.1044	0.395259	26	21.1825	0.944785	26	22.3884	0.708291	26	21.5796	0.866917	0	24	22.1621	0.375161	33	23.8829	1.58709	28	22.5184	1.03593	25	21.1834	0.763322
1466	0	15	21.072	-1.56779	20	18.9823	0.227573	21	21.6195	-0.135188	21	17.9831	0.658345	0	22	20.99	0.215326	15	21.109	-1.57733	23	22.2841	0.149279	33	21.4996	2.00197	0	34	22.0115	2.05601	34	23.7489	1.75806	27	22.3666	0.891699	16	21.0584	-1.26459
1467	1	22	20.9137	0.231592	22	18.8534	0.67086	20	21.4637	-0.32729	22	17.8573	0.883218	0	17	20.8859	-0.942471	18	21.018	-0.71136	23	22.1771	0.171594	29	21.4042	1.4105	0	18	21.8623	-0.910344	23	23.6161	-0.128472	39	22.2163	2.68755	21	20.9346	0.0142767
1468	1	27	20.7569	1.20148	30	18.7258	2.05838	22	21.3094	0.147245	22	17.7328	0.90976	0	19	20.7338	-0.397763	18	20.8924	-0.681745	18	22.0283	-0.949489	18	21.2729	-0.771431	0	13	21.7546	-2.42808	27	23.549	0.664141	21	22.1093	-0.242065	21	20.8722	0.0278966
1469	0	28	20.6016	1.39816	29	18.5994	1.93135	17	21.1565	-1.0081	12	17.6096	-1.61935	0	23	20.6227	0.495693	27	20.8214	1.18907	23	21.9273	0.22367	27	21.1956	1.11706	0	19	21.699	-0.619184	22	23.5099	-0.321923	36	22.0533	2.32445	28	20.8418	1.35277
1470	0	14	20.4478	-1.72325	22	18.4742	0.751696	28	21.0052	1.3219	18	17.4876	0.120784	0	28	20.5219	1.41323	17	20.7331	-0.905405	26	21.8236	0.819065	23	21.1029	0.395583	0	22	21.6036	0.0845116	25	23.4068	0.318647	24	21.9558	0.417264	17	20.7515	-0.909862
1471	0	31	20.3409	1.91443	26	18.4413	1.48238	22	20.9488	0.224113	26	17.4659	1.67367	0	23	20.373	0.547758	21	20.61	0.0851094	19	21.6781	-0.614396	21	20.9742	0.00563683	1	25	21.458	0.708403	24	23.277	0.147578	29	21.8093	1.33528	22	20.6304	0.292002
1472	0	16	20.3117	-1.07792	21	18.4394	0.558759	24	20.9238	0.627926	25	17.4695	1.50611	0	20	20.2256	-0.05044	27	20.4881	1.25323	19	21.534	-0.581338	19	20.8467	-0.42366	0	16	21.3137	-1.32843	26	23.1485	0.559221	24	21.6641	0.476807	25	20.5105	0.897897
1473	0	23	20.2371	0.576097	21	18.3463	0.579082	32	20.8053	1.97897	17	17.3736	-0.0906067	0	20	20.0795	-0.0177708	31	20.3673	1.90969	20	21.3913	-0.311097	25	20.7204	0.855921	0	22	21.1708	0.176782	25	23.0213	0.395748	28	21.5204	1.22453	23	20.3918	0.543843
1474	0	25	20.0864	0.982717	12	18.2232	-1.79648	11	20.6569	-2.91168	20	17.2535	0.614147	0	22	19.9347	0.440317	19	20.2477	-0.286234	26	21.2499	0.931572	26	20.5953	1.05995	2	22	21.0293	0.206965	30	22.8952	1.29715	15	21.378	-1.6468	17	20.2743	-0.794134
1475	0	19	19.9371	-0.214992	20	18.1012	0.424576	22	20.51	0.317661	13	17.1345	-1.14671	0	16	19.7913	-0.947833	25	20.1292	0.974164	21	21.1099	-0.0239754	18	20.4713	-0.582499	0	22	20.889	0.236865	20	22.7704	-0.619477	22	21.237	0.162665	27	20.1579	1.31676
1476	0	15	19.7892	-1.23658	32	17.9805	2.47832	26	20.3646	1.1052	11	17.0168	-1.81412	0	29	19.6493	1.73639	18	20.0118	-0.474192	27	20.9712	1.16025	17	20.3485	-0.812139	0	22	20.7501	0.266486	28	22.6468	1.01167	21	21.0974	-0.0212525	19	20.0427	-0.239216
1477	0	19	19.6428	-0.147464	18	17.8609	0.0327815	25	20.2205	0.955906	16	16.9002	-0.22505	1	19	19.5085	-0.116662	22	19.8956	0.448662	19	20.8338	-0.4207	18	20.2269	-0.524882	0	13	20.6526	-2.12244	24	22.5887	0.288091	21	21.001	-0.000211855	28	19.9888	1.51398
1478	0	21	19.4977	0.327828	18	17.7425	0.0606906	21	20.0778	0.201247	16	16.7848	-0.196196	0	18	19.3691	-0.322694	23	19.7804	0.671322	25	20.6977	0.860457	19	20.1064	-0.253818	1	26	20.5669	1.06552	26	22.4942	0.687553	23	20.9136	0.435053	21	19.9067	0.238578
1479	0	25	19.354	1.1292	20	17.6253	0.531009	20	19.9365	0.0142113	18	16.6705	0.313361	0	13	19.2309	-1.72815	21	19.6664	0.291012	14	20.5629	-1.75402	23	19.987	0.628261	0	24	20.4308	0.728551	21	22.373	-0.299617	19	20.7769	-0.407657	23	19.7938	0.668538
1480	0	14	19.2116	-1.39287	20	17.5092	0.556972	22	19.7965	0.469792	16	16.5574	-0.139348	0	18	19.094	-0.257871	16	19.5535	-0.888364	17	20.4294	-0.831757	25	19.8687	1.02626	1	22	20.398	0.341559	24	22.4164	0.323253	29	20.7479	1.53237	24	19.8347	0.850229
1481	0	14	19.0707	-1.35519	14	17.3942	-0.907128	28	19.6579	1.57652	22	16.4454	1.18425	0	25	18.9584	1.20831	23	19.4416	0.741984	21	20.2972	0.153367	20	19.7515	0.0555677	0	12	20.3931	-2.42287	21	22.3655	-0.297987	19	20.7397	-0.399118	21	19.8024	0.261336
1482	0	17	18.931	-0.468336	14	17.2803	-0.876697	25	19.5206	1.09588	20	16.3345	0.819629	0	13	18.8637	-1.62631	23	19.3842	0.753939	31	20.2125	1.93749	22	19.6881	0.492893	0	18	20.2583	-0.532296	22	22.2453	-0.0522925	22	20.6045	0.297515	25	19.6902	1.06196
1483	0	22	18.7927	0.683807	14	17.1675	-0.846561	29	19.3846	1.78553	17	16.2247	0.188033	0	20	18.7791	0.273008	19	19.3094	-0.0709761	20	20.1249	-0.0279295	13	19.6093	-1.83308	0	26	20.1249	1.1522	24	22.1262	0.382496	29	20.4706	1.58386	19	19.5791	-0.132845
1484	0	19	18.6556	0.079003	21	17.0559	0.860677	17	19.25	-0.545695	19	16.116	0.661628	0	17	18.6462	-0.399275	16	19.1996	-0.79991	21	19.9954	0.219214	26	19.4943	1.27587	0	20	20.0328	-0.00733573	16	22.0725	-1.51814	22	20.3799	0.345401	30	19.5292	1.9117
1485	0	15	18.5199	-0.908836	10	16.9453	-2.1963	24	19.1166	0.996821	25	16.0084	1.79832	0	22	18.5147	0.743076	15	19.0909	-1.05628	14	19.8672	-1.56808	15	19.3804	-1.13102	0	27	19.9525	1.35629	35	21.9825	2.20036	20	20.2982	-0.0666716	29	19.4511	1.77318
1486	0	27	18.3855	1.65787	15	16.8358	-0.474003	17	18.9845	-0.481316	17	15.9019	0.266334	0	19	18.3843	0.141252	22	18.9833	0.643165	22	19.7402	0.481796	18	19.2676	-0.298768	0	16	19.8619	-0.96548	24	21.9301	0.422517	25	20.209	0.958197	19	19.4024	-0.0923145
1487	0	22	18.2523	0.799015	18	16.7274	0.299962	16	18.8537	-0.713426	17	15.7964	0.291917	0	18	18.2551	-0.0601363	15	18.8767	-1.00095	24	19.6144	0.895215	14	19.1558	-1.37794	0	21	19.7831	0.26555	11	21.8413	-3.26877	21	20.1288	0.19011	18	19.3254	-0.312408
1488	0	21	18.1204	0.628386	13	16.62	-1.004	15	18.7242	-0.961571	21	15.692	1.15831	0	15	18.1272	-0.807432	24	18.771	1.06736	18	19.4897	-0.351135	25	19.045	1.19099	0	27	19.6538	1.41377	32	21.7258	1.81625	16	19.9993	-0.999829	15	19.2176	-1.08899
1489	0	21	17.9897	0.6569	21	16.5136	0.979003	23	18.5958	0.918331	12	15.5886	-1.03593	0	20	18.0004	0.447126	22	18.6664	0.710726	26	19.3663	1.30098	18	18.9353	-0.220455	0	25	19.5258	1.09484	22	21.6114	0.082859	20	19.8711	0.0288282	22	19.1109	0.615955
1490	0	17	17.8603	-0.208647	13	16.4083	-0.945302	15	18.4688	-0.895631	21	15.4862	1.20321	2	14	17.8748	-1.03558	16	18.5628	-0.640693	27	19.244	1.49264	16	18.8266	-0.706653	1	18	19.399	-0.329739	27	21.4981	1.05885	24	19.7441	0.868738	25	19.0053	1.19895
1491	0	13	17.7321	-1.31244	15	16.3041	-0.336704	14	18.3429	-1.16069	8	15.3848	-2.61093	0	23	17.7503	1.09463	26	18.4601	1.47869	20	19.1229	0.196122	20	18.7189	0.286458	0	30	19.2733	1.95842	25	21.3859	0.722829	21	19.6183	0.301514	17	18.9006	-0.460971
1492	0	25	17.6051	1.47899	15	16.2008	-0.310038	19	18.2183	0.179344	20	15.2845	1.05442	0	31	17.6271	2.40185	26	18.3585	1.49863	23	19.0029	0.833442	27	18.6122	1.61423	0	16	19.1488	-0.787205	15	21.2747	-1.62013	20	19.4937	0.113209	27	18.797	1.57866
1493	0	14	17.4793	-0.929875	20	16.0985	0.872402	16	18.0948	-0.523701	18	15.1851	0.663471	0	25	17.5049	1.49902	26	18.2577	1.51838	20	18.8841	0.249517	23	18.5065	0.936953	0	21	19.0255	0.430872	24	21.1647	0.578759	20	19.3703	0.140796	21	18.6945	0.503102
1494	0	19	17.3547	0.377466	17	15.9972	0.243211	13	17.9725	-1.37913	35	15.0868	3.36595	0	14	17.3839	-0.904378	20	18.158	0.411887	24	18.7664	1.0683	18	18.4018	-0.0947074	0	21	18.9033	0.457533	29	21.0557	1.47522	24	19.2481	0.969967	24	18.593	1.10371
1495	1	17	17.2312	-0.0560819	17	15.8969	0.267538	18	17.8514	0.0350158	15	14.9894	0.00274506	0	22	17.367	0.987763	18	18.1982	-0.0467243	17	18.7702	-0.429332	14	18.4352	-1.18535	0	18	18.7823	-0.184387	23	20.9477	0.427929	18	19.1271	-0.26567	17	18.4924	-0.361967
1496	0	15	17.109	-0.544532	25	15.7976	1.84048	16	17.7315	-0.432877	20	14.8929	1.14197	0	17	17.3741	-0.0907413	19	18.1911	0.185566	12	18.7643	-1.95269	19	18.4264	0.131597	0	17	18.7025	-0.41292	19	20.9052	-0.437074	30	19.0492	1.99934	20	18.4531	0.345907
1497	0	15	16.9879	-0.513261	18	15.6992	0.5423	20	17.6127	0.533811	18	14.7975	0.754844	0	15	17.254	-0.581971	16	18.0916	-0.522893	19	18.6474	0.0808811	14	18.3219	-1.15508	0	16	18.6344	-0.658598	16	20.8261	-1.20652	22	18.98	0.64386	15	18.3854	-0.874098
1498	0	17	16.8679	0.0320438	20	15.6018	0.983468	21	17.4951	0.764837	15	14.7029	0.0766996	0	21	17.1349	0.843433	20	17.993	0.448789	19	18.5317	0.107439	19	18.2184	0.179309	0	24	18.5157	1.11947	26	20.7202	1.03546	18	18.8615	-0.203058	16	18.2868	-0.571687
1499	0	14	16.7945	-0.746861	14	15.5964	-0.426646	17	17.4721	-0.114513	10	14.7085	-1.48897	0	21	17.017	0.869173	22	17.8953	0.87513	18	18.417	-0.0982927	19	18.1159	0.202833	0	20	18.3982	0.358173	20	20.6153	-0.137588	16	18.7441	-0.686029	27	18.1891	1.69566
1500	0	26	16.7531	1.81348	15	15.5306	-0.137008	12	17.3866	-1.55498	14	14.6399	-0.171011	0	13	16.9001	-1.08169	20	17.7985	0.492264	18	18.3035	-0.0715233	18	18.0143	-0.00336905	0	18	18.2817	-0.0664095	24	20.5115	0.712096	21	18.6279	0.517644	21	18.0924	0.634482
1501	0	17	16.6351	0.0884963	10	15.4346	-1.71858	19	17.271	0.396666	11	14.5467	-1.06936	0	16	16.7843	-0.196077	20	17.7027	0.513692	22	18.191	0.812092	28	17.9137	1.90614	0	22	18.1664	0.817329	26	20.4086	1.09656	26	18.5127	1.46838	18	17.9967	0.000771905
1502	1	17	16.5183	0.116829	12	15.3395	-0.964042	15	17.1564	-0.55679	16	14.4544	0.386396	0	18	16.6696	0.313578	19	17.6078	0.319397	18	18.0795	-0.0187438	13	17.814	-1.33515	0	22	18.0521	0.841696	31	20.3067	1.92057	22	18.3987	0.767805	22	17.902	0.873705
1503	0	21	16.4026	1.00324	24	15.2454	1.78703	17	17.043	-0.0104288	8	14.3631	-2.24969	0	22	16.5559	1.16067	17	17.5138	-0.124607	18	17.9691	0.00727084	18	17.7152	0.0671288	0	10	17.9389	-2.51049	22	20.2058	0.382515	24	18.2857	1.16642	13	17.8081	-1.33354
1504	0	17	16.288	0.172694	20	15.1521	1.08402	16	16.9306	-0.232662	17	14.2726	0.661483	0	14	16.4434	-0.653015	20	17.4206	0.576761	20	17.8598	0.478557	30	17.6173	2.26075	0	22	17.8267	0.889753	15	20.1059	-1.31835	25	18.1739	1.36522	27	17.7152	1.78685
1505	0	14	16.1744	-0.58114	21	15.0598	1.29626	24	16.8194	1.46574	9	14.1831	-1.7277	0	16	16.3318	-0.0829515	22	17.3284	0.995986	14	17.7515	-1.00264	15	17.5204	-0.650767	0	21	17.7156	0.716725	19	20.007	-0.231015	23	18.0631	1.02941	19	17.6233	0.315845
1506	0	16	16.1074	-0.0268531	14	15.0594	-0.283132	20	16.8028	0.714924	13	14.1936	-0.33105	0	14	16.2213	-0.593663	39	17.237	3.48486	21	17.6443	0.732278	18	17.4244	0.135676	0	23	17.6055	1.12484	31	19.909	1.99201	14	17.9534	-1.05659	18	17.5322	0.110262
1507	0	15	16.0723	-0.27686	18	14.9986	0.707429	17	16.7235	0.0670645	15	14.1298	0.224673	0	20	16.1118	0.869432	16	17.1466	-0.28664	30	17.538	2.27523	28	17.3292	2.01659	1	14	17.4964	-0.934445	15	19.8119	-1.24243	16	17.8447	-0.461182	26	17.442	1.67836
1508	0	16	15.9606	0.00985146	13	14.9076	-0.52906	19	16.614	0.547379	25	14.0415	2.1917	0	12	16.0033	-1.15565	19	17.0569	0.445771	30	17.4328	2.29445	25	17.235	1.55301	0	18	17.3883	0.144178	25	19.7158	1.05685	11	17.7371	-2.03131	22	17.3528	0.990794
1509	0	19	15.85	0.722667	15	14.8174	0.0471584	14	16.5056	-0.669657	18	13.954	0.953643	0	18	15.8958	0.495963	19	16.9682	0.466139	17	17.3286	-0.0796893	26	17.1416	1.73728	0	13	17.2812	-1.1874	22	19.6206	0.5073	17	17.6305	-0.152923	19	17.2644	0.39818
1510	0	19	15.7404	0.747807	14	14.728	-0.194576	16	16.3983	-0.0995669	10	13.8674	-1.22299	1	19	15.7893	0.736582	21	16.8802	0.899013	13	17.2253	-1.17189	15	17.0491	-0.529068	1	20	17.1752	0.631652	22	19.5263	0.527404	25	17.525	1.49501	27	17.1769	1.89046
1511	0	16	15.6318	0.0920401	13	14.6396	-0.454739	26	16.2919	1.90391	13	13.7817	-0.216807	0	16	15.6838	0.0790489	20	16.7931	0.717085	15	17.123	-0.548168	17	16.9574	0.0103289	1	21	17.0701	0.85758	10	19.4329	-2.98293	20	17.4204	0.576816	20	17.0902	0.650648
1512	0	15	15.5243	-0.135378	13	14.552	-0.430445	17	16.1866	0.197272	20	13.6968	1.40943	0	20	15.5793	0.988506	21	16.7068	0.936848	15	17.0217	-0.522012	20	16.8666	0.700649	0	21	16.966	0.8803	17	19.3404	-0.567622	21	17.3168	0.803729	14	17.0044	-0.802966
1513	1	20	15.4178	1.02461	21	14.4652	1.426	13	16.0823	-0.854884	15	13.6128	0.358176	1	13	15.4757	-0.686634	20	16.6214	0.755487	18	16.9214	0.254228	17	16.7766	0.0541728	0	16	16.9029	-0.225735	16	19.3131	-0.828275	25	17.2562	1.54877	18	16.9796	0.240501
1514	0	20	15.3123	1.0482	12	14.3794	-0.686858	25	15.979	1.80419	22	13.5296	1.8059	0	18	15.3731	0.619171	13	16.5367	-0.980906	15	16.822	-0.47044	19	16.6875	0.530522	2	17	16.8514	0.0360384	29	19.2492	1.81069	15	17.2041	-0.56911	18	16.9264	0.25305
1515	0	17	15.2078	0.434672	18	14.2943	0.873447	16	15.8767	0.0308197	19	13.4472	1.2739	0	21	15.311	1.24144	17	16.5063	0.11973	19	16.7698	0.511633	13	16.6519	-1.01286	0	15	16.7492	-0.451639	13	19.1583	-1.70799	22	17.1026	1.04413	11	16.8421	-1.76145
1516	0	20	15.1043	1.09472	20	14.21	1.29468	9	15.7754	-2.25847	18	13.3657	1.09232	0	13	15.2587	-0.626462	20	16.4582	0.791971	15	16.7145	-0.442678	13	16.6006	-0.998629	0	15	16.6881	-0.435853	18	19.1326	-0.266956	13	17.0439	-1.12156	9	16.8188	-2.60625
1517	0	20	15.0472	1.10748	11	14.2176	-0.970155	17	15.7686	0.298651	13	13.3841	-0.106527	1	17	15.158	0.446754	16	16.3749	-0.0937305	18	16.6169	0.325993	17	16.5129	0.118135	1	11	16.6785	-1.71214	28	19.1346	1.67541	26	17.0357	1.75805	12	16.8271	-1.39347
1518	0	12	15.0219	-0.872343	16	14.1648	0.458793	18	15.6991	0.542325	17	13.3281	0.890556	0	12	15.0978	-0.894253	19	16.3459	0.608888	16	16.5666	-0.141647	26	16.4788	1.86727	0	16	16.6288	-0.157204	20	19.072	0.207498	23	16.9856	1.2541	18	16.7751	0.288708
1519	0	16	14.9199	0.270016	15	14.0816	0.237127	16	15.5993	0.10017	9	13.2476	-1.41585	0	23	15.0473	1.65825	16	16.2991	-0.0747828	18	16.513	0.350481	15	16.4289	-0.36893	0	10	16.5284	-2.06446	26	18.9826	1.37623	21	16.8859	0.89777	13	16.692	-1.02398
1520	0	14	14.819	-0.218875	16	13.9992	0.500199	12	15.5005	-1.0105	7	13.1678	-2.33119	0	17	14.9484	0.497591	8	16.2172	-2.90522	10	16.4173	-2.02932	20	16.3426	0.817825	0	18	16.5308	0.346292	21	19.0573	0.423933	19	16.8935	0.483265	20	16.7625	0.723938
1521	0	17	14.7189	0.553242	12	13.9176	-0.553562	16	15.4026	0.149349	11	13.0888	-0.629786	1	13	14.8504	-0.513195	15	16.136	-0.293324	29	16.3224	2.35417	20	16.2571	0.83694	0	21	16.5609	0.968697	22	19.0375	0.631605	18	16.9215	0.254196	17	16.7593	0.058369
1522	0	18	14.6198	0.796711	18	13.8368	0.98128	16	15.3057	0.173585	19	13.0106	1.37407	1	15	14.7928	0.0534858	8	16.1091	-2.86701	15	16.2748	-0.329139	11	16.2251	-1.57544	0	15	16.4608	-0.377172	18	18.948	-0.223446	14	16.8223	-0.754279	14	16.676	-0.715202
1523	1	20	14.5217	1.22499	15	13.7568	0.321005	17	15.2096	0.434225	15	12.9331	0.533665	0	21	14.7451	1.36494	15	16.0644	-0.274835	17	16.2238	0.188244	13	16.1774	-0.881249	0	14	16.4017	-0.641895	18	18.9237	-0.217719	27	16.7658	1.96957	19	16.6537	0.538269
1524	0	20	14.4245	1.24673	11	13.6775	-0.807297	16	15.1145	0.221361	10	12.8565	-0.903293	0	18	14.6488	0.78989	15	15.9846	-0.254213	12	16.1307	-1.19243	11	16.0933	-1.53567	0	18	16.3542	0.387924	17	18.8627	-0.451771	19	16.718	0.523532	17	16.603	0.0962957
1525	0	14	14.3282	-0.087704	17	13.599	0.82486	17	15.0204	0.480129	12	12.7806	-0.22533	0	12	14.5534	-0.737098	18	15.9055	0.49369	16	16.0385	-0.00961542	11	16.0099	-1.51054	0	14	16.2559	-0.60291	18	18.7747	-0.182608	9	16.6206	-2.54019	14	16.5211	-0.673791
1526	0	18	14.2328	0.887947	17	13.5213	0.84371	19	14.9271	0.934387	11	12.7054	-0.514205	1	24	14.4985	1.93949	12	15.8806	-1.12023	21	15.9934	1.09254	13	15.9801	-0.82652	0	12	16.1585	-1.20046	29	18.6876	1.91496	10	16.5241	-2.0631	12	16.44	-1.28173
1527	1	14	14.1837	-0.0491001	17	13.5354	0.840298	17	14.9283	0.502459	16	12.7302	0.817449	0	13	14.4929	-0.414059	16	15.8914	0.0271587	14	15.9913	-0.5322	18	15.9871	0.474435	0	13	16.062	-0.849253	17	18.6014	-0.388389	12	16.4285	-1.27841	20	16.3598	0.813972
1528	0	17	14.1664	0.687254	9	13.489	-1.49632	18	14.8667	0.738529	19	12.6806	1.44978	0	20	14.4476	1.24155	15	15.8484	-0.219056	13	15.9429	-0.816204	16	15.9412	0.0146897	0	17	15.9664	0.250674	12	18.5159	-1.88099	18	16.3339	0.392703	19	16.2804	0.623925
1529	0	14	14.0723	-0.0193306	15	13.4121	0.410003	19	14.7747	0.969346	12	12.6062	-0.17499	0	15	14.3538	0.166845	15	15.7703	-0.198879	18	15.8522	0.50625	15	15.8589	-0.221776	1	15	15.8718	-0.225085	20	18.4313	0.350764	14	16.2402	-0.598715	8	16.2017	-2.89975
1530	0	16	13.9792	0.505209	15	13.3359	0.42966	11	14.6836	-1.11066	13	12.5326	0.129644	0	15	14.2609	0.190842	15	15.6929	-0.178896	20	15.7623	0.947573	16	15.7774	0.0556507	0	18	15.7779	0.523746	16	18.3475	-0.586888	14	16.1474	-0.573909	13	16.1239	-0.866407
1531	0	18	13.9323	0.958757	18	13.3516	1.09564	13	14.687	-0.467892	14	12.5588	0.385165	0	14	14.2084	-0.0557008	12	15.6697	-1.05935	17	15.7196	0.310536	15	15.7494	-0.193483	0	8	15.685	-2.71705	17	18.2646	-0.306705	16	16.0555	-0.0138617	13	16.0468	-0.845031
1532	0	16	13.9172	0.5207	19	13.3067	1.30613	13	14.6275	-0.451398	12	12.5107	-0.147422	0	14	14.1656	-0.0442658	9	15.6287	-2.20956	16	15.6737	0.0815864	21	15.7055	1.15536	0	18	15.5929	0.567359	21	18.1824	0.61485	8	15.9644	-2.81584	22	15.9705	1.2855
1533	0	14	13.8253	0.0466831	18	13.2314	1.12397	12	14.5377	-0.732571	13	12.4378	0.155926	0	21	14.0743	1.51131	26	15.5525	2.04893	26	15.5854	2.04247	18	15.6252	0.559743	0	27	15.5017	2.21285	18	18.101	-0.0238117	15	15.8742	-0.225728	18	15.8949	0.496165
1534	0	16	13.7343	0.566419	13	13.1568	-0.0434891	12	14.4487	-0.706886	15	12.3656	0.680188	0	16	13.9838	0.504048	16	15.477	0.13075	20	15.498	1.00668	9	15.5457	-2.18189	0	14	15.4113	-0.37718	10	18.0204	-2.53628	23	15.7849	1.50444	20	15.8202	0.934641
1535	0	11	13.6442	-0.79725	12	13.0829	-0.312617	9	14.3606	-1.78687	16	12.2942	0.926447	0	14	13.8942	0.0282871	15	15.4023	-0.10386	16	15.4114	0.147148	15	15.4669	-0.120552	1	16	15.3619	0.159535	15	18.005	-0.775879	24	15.7384	1.6864	12	15.8063	-1.09878
1536	1	6	13.5549	-3.08427	13	13.0098	-0.00271458	16	14.2733	0.431665	9	12.2235	-1.0745	0	13	13.8053	-0.223362	10	15.3282	-1.68493	17	15.3256	0.406089	15	15.3888	-0.1004	0	16	15.3238	0.169049	21	17.9527	0.664976	13	15.7004	-0.748941	18	15.7638	0.52707
1537	0	20	13.4664	1.46095	13	12.9374	0.0173751	19	14.1869	1.1042	17	12.1535	1.17545	2	15	13.7173	0.33118	20	15.2549	1.06104	23	15.2407	1.61792	10	15.3115	-1.67965	0	15	15.2349	-0.0606599	19	17.8734	0.258461	13	15.6126	-0.724612	12	15.6902	-1.06527
1538	0	16	13.3788	0.655293	12	12.8656	-0.249884	18	14.1013	0.918929	16	12.0842	0.978957	0	15	13.6302	0.353689	12	15.1823	-0.918638	21	15.1566	1.27514	14	15.2349	-0.330053	0	15	15.1469	-0.0379265	20	17.7949	0.493084	19	15.5258	0.797048	15	15.6173	-0.159395
1539	0	11	13.292	-0.691078	11	12.7946	-0.541091	12	14.0165	-0.582125	16	12.0156	0.996111	0	13	13.5438	-0.150822	26	15.1103	2.13564	16	15.0732	0.231687	10	15.1591	-1.63144	0	15	15.0597	-0.0154034	18	17.7171	0.0666842	14	15.4397	-0.384779	20	15.5452	0.996128
1540	1	18	13.2515	1.11922	13	12.8153	0.0512284	13	14.0262	-0.284608	18	12.0468	1.40318	0	10	13.4582	-1.09359	15	15.0391	-0.0100908	20	14.9907	1.12011	17	15.0839	0.464721	0	18	14.9732	0.713416	14	17.6401	-0.972847	18	15.3545	0.623551	14	15.4738	-0.393876
1541	0	17	13.2426	0.91129	15	12.7754	0.574377	18	13.9729	0.949199	9	12.0035	-1.00118	0	10	13.3734	-1.06678	11	14.9685	-1.19655	22	14.909	1.51181	17	15.0094	0.48278	0	12	14.9277	-0.845165	14	17.6281	-0.969657	21	15.312	1.24123	17	15.4632	0.37273
1542	0	14	13.157	0.225306	18	12.7051	1.24803	6	13.8892	-3.22075	12	11.9355	0.0186135	1	15	13.3925	0.415064	13	15.0377	-0.565153	17	14.9483	0.497605	16	15.0728	0.231803	1	17	14.8936	0.510884	9	17.5794	-2.85979	14	15.278	-0.341546	13	15.424	-0.672309
1543	0	14	13.0721	0.247986	18	12.6354	1.26445	11	13.8063	-0.846127	11	11.8682	-0.261766	0	32	13.4352	3.28182	12	15.0593	-0.883128	14	14.9777	-0.261313	15	15.0937	-0.0241985	1	17	14.8086	0.531504	21	17.5035	0.762994	18	15.1942	0.661334	15	15.3537	-0.0913227
1544	0	11	13.0335	-0.613129	15	12.6574	0.604851	14	13.8178	0.0487023	14	11.9007	0.561065	0	14	13.3503	0.173647	10	14.9881	-1.57737	15	14.8958	0.0269007	15	15.0187	-0.00482577	0	19	14.7243	0.980907	16	17.4284	-0.357105	14	15.1113	-0.296994	15	15.284	-0.0733392
1545	0	8	13.0265	-1.77714	17	12.6189	1.06257	17	13.7663	0.784279	13	11.8587	0.316542	0	18	13.2661	1.11578	17	14.9176	0.505062	16	14.8147	0.296333	13	14.9444	-0.53927	0	11	14.6409	-1.09776	18	17.354	0.152253	18	15.0291	0.700248	19	15.2151	0.868318
1546	0	20	12.9427	1.57805	18	12.5498	1.28462	12	13.6845	-0.486261	14	11.7919	0.590136	0	8	13.1828	-1.83239	8	14.8478	-2.42105	19	14.7343	0.978619	14	14.8707	-0.232716	1	13	14.5582	-0.432164	21	17.2804	0.811686	12	14.9477	-0.85094	13	15.1468	-0.595422
1547	1	17	12.8597	1.00417	12	12.4815	-0.138985	18	13.6034	1.0363	21	11.7258	2.02379	1	13	13.1398	-0.0387841	15	14.8321	0.0433514	20	14.701	1.1849	17	14.8506	0.521319	0	14	14.4763	-0.127289	16	17.2074	-0.30186	14	14.8672	-0.231759	15	15.0793	-0.0204611
1548	0	10	12.7775	-0.878322	14	12.4137	0.423945	13	13.5231	-0.145071	13	11.6604	0.371548	0	13	13.1065	-0.0295298	7	14.7985	-2.94757	24	14.6643	1.90564	21	14.8145	1.3498	0	17	14.4352	0.622045	10	17.1995	-2.2767	13	14.8292	-0.507339	14	15.0725	-0.286638
1549	0	8	12.6961	-1.66031	20	12.3467	1.71133	14	13.4435	0.148723	13	11.5956	0.389516	0	11	13.0245	-0.610401	7	14.7297	-2.92156	9	14.5853	-1.86175	16	14.7419	0.31453	0	19	14.4456	1.04484	21	17.2191	0.825053	14	14.8416	-0.224935	16	15.0973	0.225678
1550	0	8	12.6154	-1.63179	13	12.2803	0.199608	16	13.3648	0.658809	16	11.5314	1.11714	0	5	12.9432	-3.55232	12	14.6615	-0.768322	14	14.507	-0.135491	20	14.67	1.19183	0	10	14.4157	-1.39636	14	17.174	-0.848297	7	14.8119	-2.95264	7	15.0615	-3.04697
1551	0	14	12.5809	0.37926	17	12.3056	1.13856	12	13.3803	-0.398473	7	11.5671	-1.72622	0	17	12.8628	1.00343	10	14.594	-1.45276	13	14.4294	-0.396449	15	14.5988	0.103596	0	14	14.3348	-0.0894805	21	17.1018	0.850648	17	14.7325	0.549954	14	14.9945	-0.265803
1552	0	8	12.5781	-1.61859	17	12.2703	1.14712	18	13.333	1.10003	12	11.5283	0.136171	0	12	12.8226	-0.237475	13	14.5807	-0.438397	20	14.3989	1.25245	13	14.581	-0.438481	0	21	14.2948	1.46319	26	17.0947	1.74647	15	14.6957	0.0785791	10	14.9884	-1.57747
1553	0	10	12.4983	-0.790044	13	12.2044	0.220648	16	13.2551	0.686222	8	11.4646	-1.22493	0	12	12.7921	-0.228656	9	14.5494	-1.84979	19	14.365	1.06334	13	14.5473	-0.429129	0	15	14.2661	0.189485	21	17.0507	0.861816	13	14.6673	-0.462422	16	14.9536	0.261601
1554	0	17	12.4194	1.11097	11	12.1392	-0.343491	12	13.178	-0.340061	8	11.4016	-1.20265	0	14	12.7129	0.343998	16	14.4828	0.379304	8	14.2887	-2.22339	23	14.477	1.77717	0	17	14.1865	0.682368	16	16.9795	-0.244882	14	14.5891	-0.157451	6	14.8876	-3.62833
1555	0	16	12.3412	0.914712	18	12.0747	1.39662	12	13.1016	-0.318017	9	11.3392	-0.779744	0	15	12.6344	0.610795	17	14.4168	0.626508	12	14.2131	-0.638874	12	14.4074	-0.694969	0	17	14.1077	0.701495	20	16.9091	0.691151	13	14.5117	-0.419278	12	14.8222	-0.814696
1556	0	11	12.2637	-0.381012	10	12.0107	-0.635845	17	13.026	0.963832	11	11.2775	-0.0836628	0	15	12.5567	0.630868	17	14.3515	0.642346	18	14.1383	0.910216	13	14.3385	-0.371242	0	14	14.0295	-0.00789109	15	16.8393	-0.474909	9	14.4351	-1.81169	16	14.7575	0.310632
1557	0	12	12.1869	-0.0539625	12	11.9474	0.0151821	20	12.9511	1.57618	14	11.2164	0.743962	0	11	12.4796	-0.446128	19	14.2869	1.08127	13	14.0641	-0.295142	22	14.2703	1.64798	0	14	13.9521	0.0127986	15	16.7702	-0.457071	12	14.3591	-0.681027	15	14.6934	0.079161
1558	0	7	12.1109	-1.93175	12	11.8847	0.0332791	12	12.877	-0.253156	10	11.1558	-0.365507	0	11	12.4033	-0.423121	10	14.2228	-1.33537	15	13.9907	0.260593	22	14.2027	1.6624	0	17	13.8754	0.757824	11	16.7018	-1.71916	15	14.284	0.184881	19	14.63	1.00255
1559	0	12	12.0356	-0.0102828	13	11.8226	0.32654	19	12.8035	1.42157	10	11.0959	-0.346564	0	12	12.3277	-0.0946103	16	14.1594	0.460155	13	13.918	-0.25461	8	14.1357	-2.16929	0	12	13.7994	-0.519448	8	16.6341	-3.0526	16	14.2095	0.447627	23	14.5672	1.75836
1560	0	12	11.961	0.0112472	12	11.7612	0.0689428	12	12.7308	-0.210953	18	11.0366	1.64128	0	14	12.2529	0.466946	12	14.0966	-0.605224	14	13.846	0.0411626	15	14.0693	0.240297	0	17	13.7241	0.794514	20	16.567	0.767649	11	14.1357	-0.945462	17	14.5051	0.605111
1561	0	14	11.8872	0.56468	13	11.7003	0.360469	16	12.6587	0.83532	24	10.9779	2.65812	0	13	12.1786	0.227802	27	14.0343	2.49524	10	13.7746	-1.19365	12	14.0036	-0.578394	0	11	13.6495	-0.798866	15	16.5005	-0.387433	15	14.0627	0.242009	17	14.4435	0.620033
1562	0	6	11.814	-2.37355	19	11.64	1.68849	18	12.5874	1.27577	12	10.9198	0.311822	0	12	12.1051	-0.0303515	16	13.9727	0.506819	11	13.704	-0.815285	11	13.9385	-0.885996	0	20	13.5756	1.43653	12	16.4347	-1.28019	9	13.9904	-1.66346	16	14.3826	0.404343
1563	0	10	11.7415	-0.550711	21	11.5804	2.05553	12	12.5167	-0.149163	12	10.8623	0.328429	0	16	12.0323	0.991921	17	13.9117	0.749023	12	13.634	-0.471699	14	13.874	0.0336664	1	12	13.5024	-0.433707	14	16.3696	-0.633292	14	13.9187	0.0217216	15	14.3223	0.174973
1564	0	19	11.6697	1.68169	9	11.5213	-0.840423	10	12.4467	-0.773728	16	10.8053	1.29866	0	14	11.9602	0.545169	18	13.8513	0.977867	12	13.5647	-0.45169	12	13.8102	-0.522547	0	11	13.4299	-0.732629	16	16.305	-0.0762572	16	13.8478	0.538057	16	14.2626	0.434339
1565	0	8	11.5986	-1.27229	15	11.4627	0.913313	13	12.3774	0.172667	14	10.749	0.868875	0	13	11.8887	0.308223	11	13.7914	-0.84164	17	13.4961	0.849833	16	13.7469	0.56328	1	19	13.358	1.29437	19	16.2411	0.63293	22	13.7775	1.75304	17	14.2035	0.678238
1566	1	17	11.5281	1.32712	18	11.4048	1.5545	10	12.3088	-0.730109	16	10.6932	1.32671	0	18	11.8179	1.45714	13	13.7321	-0.203055	11	13.4281	-0.732086	20	13.6842	1.41226	0	14	13.2867	0.190624	19	16.1778	0.647448	17	13.7079	0.79845	12	14.1451	-0.619224
1567	0	7	11.4584	-1.6851	19	11.3474	1.75562	10	12.2408	-0.708615	16	10.6379	1.34052	0	9	11.7477	-0.915902	13	13.6734	-0.186772	11	13.3607	-0.711781	13	13.6221	-0.172543	0	18	13.2162	1.12756	20	16.1152	0.868676	12	13.639	-0.473132	15	14.0871	0.235698
1568	0	15	11.3892	0.932295	12	11.2906	0.204781	13	12.1735	0.229223	10	10.5832	-0.18443	0	13	11.6782	0.366603	23	13.6153	1.95685	16	13.294	0.676499	18	13.5606	1.04638	0	11	13.1463	-0.647123	15	16.0531	-0.271907	17	13.5707	0.831724	22	14.0298	1.69925
1569	0	14	11.3208	0.716055	12	11.2344	0.221022	15	12.1069	0.747007	7	10.5291	-1.33387	0	14	11.6093	0.638934	17	13.5577	0.834885	6	13.2279	-2.95079	19	13.4997	1.26186	0	13	13.1171	-0.032484	29	16.056	2.40365	17	13.545	0.837966	19	14.0332	1.13946
1570	0	5	11.2984	-2.81673	13	11.2697	0.479903	16	12.1344	0.966395	11	10.5747	0.128248	0	10	11.5411	-0.487338	16	13.5007	0.624838	10	13.1625	-1.00007	17	13.4393	0.86359	0	16	13.0991	0.725212	19	16.0219	0.683228	19	13.5276	1.25546	14	14.0079	-0.00211066
1571	0	12	11.3075	0.199908	13	11.2443	0.486936	15	12.0989	0.749059	15	10.5456	1.15012	0	15	11.4735	0.910538	17	13.4442	0.862418	13	13.0977	-0.0270932	10	13.3795	-1.06871	0	19	13.0703	1.36036	23	16.0249	1.4544	16	13.5022	0.62446	20	14.0114	1.33909
1572	0	15	11.2396	0.970924	8	11.1883	-1.12723	15	12.0328	0.766129	11	10.4916	0.153282	0	11	11.4065	-0.122573	23	13.3882	2.0042	22	13.0335	1.91167	8	13.3203	-1.88102	0	11	13.0526	-0.618895	15	15.991	-0.255871	10	13.4851	-1.10208	20	13.9862	1.34474
1573	0	10	11.1724	-0.370746	13	11.1328	0.51786	12	11.9673	0.00943295	7	10.4382	-1.29952	0	14	11.3402	0.710867	14	13.3328	0.178315	13	12.9699	0.00834661	10	13.2616	-1.03143	0	15	12.984	0.520538	22	15.9298	1.29416	14	13.4181	0.155519	20	13.9296	1.35739
1574	0	11	11.1058	-0.0319041	14	11.0779	0.780964	13	11.9025	0.304397	6	10.3853	-1.79029	1	11	11.2744	-0.0827467	15	13.2779	0.444636	11	12.9069	-0.57496	17	13.2035	0.920778	0	16	12.9159	0.771019	8	15.8693	-2.78221	8	13.3518	-1.89214	18	13.8736	0.972607
1575	0	13	11.0399	0.543646	11	11.0235	-0.00708795	10	11.8383	-0.581312	10	10.333	-0.10529	0	9	11.2093	-0.736437	12	13.2236	-0.353218	13	12.8445	0.0431143	18	13.146	1.14411	0	12	12.8485	-0.244942	16	15.8093	0.047668	20	13.2861	1.50128	19	13.8181	1.1888
1576	0	8	10.9745	-1.05165	8	10.9696	-1.04993	10	11.7747	-0.561202	10	10.2811	-0.0889017	0	9	11.1448	-0.714928	16	13.1698	0.707562	14	12.7828	0.32532	16	13.0889	0.727766	0	8	12.7817	-1.69059	17	15.75	0.303182	14	13.221	0.208189	12	13.7632	-0.509007
1577	0	12	10.9098	0.314712	9	10.9163	-0.638773	15	11.7117	0.849036	10	10.2298	-0.0726783	0	14	11.0808	0.780175	19	13.1164	1.34978	13	12.7216	0.0772228	13	13.0324	-0.00899755	0	11	12.7155	-0.51725	26	15.6911	2.02173	13	13.1566	-0.0434314	12	13.7089	-0.493323
1578	0	17	10.8457	1.49264	22	10.8635	2.37431	17	11.6493	1.29773	7	10.179	-1.20157	0	10	11.0175	-0.321765	9	13.0636	-1.35455	11	12.661	-0.500797	13	12.9765	0.00652446	0	20	12.65	1.64352	12	15.6329	-1.04873	11	13.0928	-0.630997	13	13.6551	-0.181703
1579	1	10	10.7822	-0.247355	16	10.8112	1.29719	8	11.5876	-1.26839	11	10.1288	0.262686	0	16	10.9944	1.25141	11	13.0648	-0.622568	10	12.6472	-0.83712	16	12.9738	0.756558	1	19	12.585	1.47171	15	15.5752	-0.148527	13	13.0296	-0.00820458	14	13.6019	0.106397
1580	0	10	10.7193	-0.227464	10	10.7594	-0.240157	16	11.5264	1.11841	16	10.079	1.48025	1	12	10.9807	0.294262	7	13.0479	-2.28591	13	12.6299	0.102647	14	12.955	0.279288	0	15	12.5206	0.640177	16	15.5181	0.120467	10	12.967	-0.938245	13	13.5492	-0.152319
1581	0	14	10.657	0.893453	11	10.7082	0.0879892	12	11.4658	0.154211	9	10.0297	-0.343245	0	13	10.9181	0.577417	10	12.9956	-0.947303	15	12.5701	0.627411	18	12.8996	1.20218	0	17	12.4568	1.10188	15	15.4616	-0.119179	12	12.905	-0.261251	18	13.497	1.06136
1582	0	10	10.5953	-0.188247	10	10.6574	-0.207889	10	11.4058	-0.444553	14	9.98096	1.07413	0	15	10.8561	1.06994	13	12.9438	0.0155789	13	12.5108	0.13569	11	12.8447	-0.556191	0	15	12.3936	0.672965	6	15.4056	-3.83981	20	12.8436	1.60022	12	13.4454	-0.417241
1583	0	17	10.5796	1.55717	10	10.6982	-0.22078	14	11.44	0.684198	11	10.0319	0.291906	0	12	10.7947	0.347934	18	12.8925	1.20384	12	12.452	-0.130494	10	12.7903	-0.882368	0	10	12.331	-0.737127	15	15.3501	-0.0903963	12	12.7828	-0.225974	17	13.3942	0.874527
1584	0	12	10.5953	0.405492	10	10.6782	-0.214464	16	11.411	1.14725	12	10.0081	0.575022	0	10	10.7339	-0.232077	13	12.8417	0.0439022	18	12.3939	1.32137	14	12.7364	0.337706	0	11	12.269	-0.382604	20	15.2952	1.05203	8	12.7226	-1.66968	10	13.3436	-1.05734
1585	0	15	10.534	1.15311	10	10.6275	-0.198434	6	11.3514	-2.18468	9	9.95931	-0.319769	0	9	10.7132	-0.571081	9	12.8449	-1.28162	15	12.3826	0.675819	17	12.7358	1.03422	1	12	12.2476	-0.0714789	8	15.3051	-2.58275	10	12.7048	-0.855336	20	13.3537	1.48616
1586	0	3	10.4733	-4.31472	7	10.5773	-1.3521	10	11.2923	-0.408661	13	9.91105	0.856722	0	17	10.702	1.5275	13	12.8299	0.0471673	18	12.3677	1.32755	15	12.7191	0.588933	0	12	12.2374	-0.0685213	16	15.278	0.180491	13	12.6953	0.0845101	15	13.3349	0.429921
1587	0	10	10.4132	-0.130653	14	10.5276	0.928035	12	11.2338	0.221179	4	9.86327	-2.93164	0	15	10.6419	1.12527	9	12.7796	-1.25985	19	12.3102	1.53475	7	12.6657	-2.14143	0	10	12.176	-0.688125	18	15.2237	0.654388	15	12.6358	0.610429	12	13.2848	-0.370882
1588	0	7	10.3536	-1.26753	12	10.4784	0.439248	13	11.1759	0.505916	15	9.81598	1.33851	0	9	10.5823	-0.527437	17	12.7297	1.03571	11	12.2533	-0.377879	16	12.6128	0.846799	0	9	12.1153	-1.03843	16	15.1698	0.207544	9	12.5769	-1.1923	12	13.2351	-0.356551
1589	0	13	10.2946	0.750352	15	10.4297	1.18005	10	11.1185	-0.353711	7	9.76917	-1.04665	0	9	10.5233	-0.50777	10	12.6803	-0.847575	12	12.1969	-0.0568416	13	12.5604	0.121917	0	17	12.0551	1.19932	16	15.1165	0.220874	8	12.5186	-1.59756	11	13.186	-0.659099
1590	0	8	10.2361	-0.790585	14	10.3814	0.967105	11	11.0617	-0.0186113	14	9.72283	1.14312	0	16	10.4649	1.38379	12	12.6313	-0.182251	13	12.1411	0.238225	18	12.5085	1.29435	0	14	11.9954	0.535744	11	15.0637	-1.22525	23	12.4608	2.19758	21	13.1373	1.71577
1591	0	7	10.1782	-1.20125	14	10.3337	0.979874	11	11.0055	-0.00164906	5	9.67695	-2.0916	0	5	10.4069	-2.41806	13	12.5829	0.11569	11	12.0858	-0.32737	12	12.4571	-0.131962	0	15	11.9765	0.780675	13	15.0758	-0.575712	9	12.4454	-1.14848	9	13.1493	-1.38311
1592	0	13	10.1209	0.798531	15	10.2863	1.21706	13	10.9497	0.568636	9	9.63154	-0.210514	0	15	10.3496	1.20074	19	12.5349	1.4832	11	12.031	-0.310853	9	12.4062	-1.1354	0	14	11.9686	0.542924	17	15.0508	0.472761	9	12.4383	-1.14611	15	13.1325	0.482181
1593	0	14	10.064	1.05193	13	10.2395	0.765626	13	10.8946	0.583939	12	9.58659	0.696691	0	8	10.2927	-0.810598	17	12.4873	1.09448	8	11.9767	-1.40599	19	12.3558	1.52429	1	16	11.9096	1.02261	22	14.9985	1.49273	19	12.3812	1.51845	13	13.0843	-0.0233756
1594	1	13	10.0078	0.829896	11	10.1931	0.243285	12	10.8399	0.334882	16	9.54209	1.61448	0	12	10.2364	0.509108	11	12.4403	-0.434258	10	11.923	-0.608103	15	12.3058	0.695637	0	13	11.8511	0.318642	19	14.9467	0.9299	11	12.3247	-0.399409	13	13.0365	-0.0101317
1595	0	11	9.95203	0.315976	10	10.1472	-0.0465438	16	10.7858	1.30354	11	9.49804	0.452856	0	9	10.1806	-0.393532	12	12.3936	-0.113636	14	11.8698	0.569329	9	12.2563	-1.08544	0	6	11.7932	-2.36507	15	14.8954	0.027016	15	12.2687	0.705223	13	12.9893	0.00297855
1596	0	6	9.89681	-1.59087	9	10.1017	-0.367235	7	10.7322	-1.41065	13	9.45444	0.983361	0	12	10.1253	0.541176	10	12.3475	-0.742335	9	11.8171	-0.939016	15	12.2073	0.721075	1	9	11.7358	-0.911941	12	14.8446	-0.821158	20	12.2132	1.74118	8	12.9425	-1.74743
1597	0	8	9.84211	-0.651286	18	10.0567	1.87226	9	10.6791	-0.559717	10	9.41128	0.186171	1	8	10.0705	-0.732047	7	12.3017	-2.00387	15	11.7648	0.835317	11	12.1587	-0.349368	1	12	11.679	0.0926755	16	14.7943	0.301431	13	12.1583	0.233452	8	12.8962	-1.73105
1598	0	10	9.8334	0.0526848	5	10.1031	-2.28218	12	10.7202	0.369453	11	9.46772	0.462	0	7	10.0163	-1.14004	7	12.2564	-1.98675	14	11.7131	0.611196	17	12.1106	1.18585	1	12	11.6226	0.108939	8	14.7445	-2.38453	10	12.1039	-0.665303	11	12.8503	-0.557885
1599	0	13	9.856	0.871988	10	10.0888	-0.0280703	11	10.698	0.091059	10	9.44942	0.174108	0	11	9.96251	0.312816	13	12.2116	0.218668	10	11.6619	-0.525536	9	12.063	-1.02098	0	10	11.6069	-0.508157	18	14.7595	0.763797	14	12.0919	0.509971	21	12.8651	1.77519
1600	0	11	9.80152	0.361355	17	10.0436	1.68716	16	10.6451	1.33873	8	9.40611	-0.497134	0	10	9.90924	0.0287015	12	12.1671	-0.0482525	12	11.6112	0.112251	7	12.0157	-1.89577	0	10	11.6023	-0.506688	13	14.7374	-0.481872	8	12.0881	-1.44535	15	12.851	0.554871
1601	1	6	9.74756	-1.52993	14	9.99897	1.06932	10	10.5927	-0.187424	10	9.36323	0.201365	0	12	9.85646	0.618787	11	12.1232	-0.338642	18	11.5609	1.51771	15	11.969	0.782608	0	10	11.5465	-0.489052	18	14.688	0.780642	11	12.0342	-0.311831	7	12.8055	-2.19426
1602	0	9	9.6941	-0.231368	11	9.95473	0.31516	11	10.5408	0.138455	13	9.32079	1.02043	0	9	9.84379	-0.281264	18	12.1331	1.38285	12	11.5574	0.127766	9	11.9754	-0.991791	0	14	11.5314	0.659764	12	14.7035	-0.780419	10	12.0228	-0.639664	14	12.8206	0.315217
1603	0	7	9.64116	-0.998263	9	9.91093	-0.303644	12	10.4894	0.436069	12	9.27878	0.78555	0	13	9.84043	0.876308	15	12.1248	0.742373	13	11.5503	0.402083	17	11.9656	1.22101	0	14	11.5674	0.65013	13	14.7461	-0.484291	13	12.0614	0.260312	12	12.867	-0.250277
1604	0	16	9.58871	1.60282	15	9.86756	1.32519	9	10.4385	-0.479507	12	9.23719	0.797555	0	9	9.78815	-0.262715	14	12.081	0.512863	7	11.5005	-1.70102	15	11.9192	0.795471	0	8	11.603	-1.27386	11	14.7883	-1.14221	12	12.0996	-0.0287542	15	12.9128	0.538911
1605	1	10	9.58222	0.132114	12	9.91565	0.601699	7	10.4817	-1.31596	11	9.2952	0.514017	1	9	9.73635	-0.24545	10	12.0377	-0.64438	10	11.4512	-0.458899	10	11.8731	-0.592329	0	11	11.598	-0.180307	20	14.7655	1.17047	13	12.0954	0.250877	8	12.8979	-1.73166
1606	1	7	9.60704	-0.985367	8	9.90294	-0.672791	12	10.4617	0.444076	9	9.27845	-0.0928167	1	10	9.68503	0.0996017	14	11.9948	0.535915	14	11.4023	0.694259	15	11.8275	0.819136	1	8	11.5419	-1.25224	11	14.7155	-1.12025	13	12.0413	0.265901	17	12.8515	1.00615
1607	0	11	9.55474	0.435761	13	9.85944	0.871034	4	10.4109	-3.20545	12	9.23667	0.797704	0	16	9.63419	1.59145	12	11.9523	0.0137747	13	11.3539	0.456533	10	11.7823	-0.563619	0	10	11.4863	-0.47	5	14.6659	-4.32271	12	11.9876	0.00356874	14	12.8056	0.319207
1608	0	8	9.50295	-0.531372	9	9.81637	-0.272124	14	10.3606	0.972668	16	9.19532	1.70117	0	11	9.58382	0.426996	15	11.9102	0.797787	7	11.306	-1.62753	13	11.7376	0.350137	0	9	11.4312	-0.81039	9	14.6168	-1.87226	8	11.9345	-1.39106	21	12.7602	1.79807
1609	0	6	9.4971	-1.42769	5	9.86476	-2.17559	15	10.4044	1.18658	9	9.25356	-0.0845203	0	14	9.53391	1.19361	17	11.8685	1.24457	11	11.2586	-0.0779623	11	11.6932	-0.209017	2	4	11.3766	-3.68829	11	14.5682	-1.07585	20	11.8819	1.81526	22	12.7153	1.97951
1610	0	8	9.56802	-0.554378	9	9.94339	-0.314462	17	10.4785	1.58169	5	9.33622	-1.93922	0	13	9.52408	0.964046	17	11.8807	1.24162	17	11.2578	1.39268	20	11.702	1.85548	0	17	11.3225	1.377	16	14.52	0.369988	14	11.8298	0.580011	10	12.6708	-0.844571
1611	0	12	9.59263	0.694947	9	9.92999	-0.309998	11	10.4582	0.163351	9	9.31867	-0.106225	0	8	9.56316	-0.55266	14	11.9282	0.553716	13	11.2997	0.471567	16	11.7474	1.06314	1	15	11.2689	0.963367	12	14.4724	-0.713716	10	11.7782	-0.562315	13	12.6267	0.103528
1612	0	8	9.54015	-0.544524	15	9.88582	1.32048	10	10.4072	-0.128758	5	9.27611	-1.91234	0	11	9.56211	0.43354	17	11.9216	1.23169	9	11.2948	-0.764944	10	11.7395	-0.55007	1	13	11.2559	0.483718	11	14.4895	-1.05214	10	11.769	-0.559398	10	12.6433	-0.835882
1613	1	9	9.48817	-0.162722	16	9.8421	1.53948	14	10.3566	0.973736	9	9.23399	-0.0779959	1	19	9.51213	2.17667	14	11.8795	0.566734	6	11.2473	-2.14218	14	11.6948	0.6161	0	16	11.254	1.1865	20	14.4696	1.23664	13	11.7679	0.341718	12	12.631	-0.182155
1614	0	5	9.43668	-1.98414	8	9.79881	-0.635974	20	10.3065	2.16752	14	9.1923	1.28491	0	8	9.46262	-0.517113	9	11.8378	-0.945923	13	11.2001	0.499192	15	11.6505	0.864842	0	12	11.2009	0.230681	13	14.4223	-0.394474	7	11.7168	-1.78279	9	12.5872	-1.19575
1615	0	13	9.38569	1.00243	8	9.75595	-0.620822	5	10.257	-2.35099	6	9.15104	-1.28641	0	12	9.41356	0.74664	9	11.7965	-0.932155	3	11.1535	-4.70741	16	11.6066	1.09835	0	14	11.2502	0.734923	15	14.5388	0.119078	20	11.7725	1.83972	14	12.6967	0.348332
1616	0	10	9.33518	0.210235	8	9.71352	-0.605821	12	10.2079	0.517337	4	9.1102	-2.5551	0	12	9.36496	0.76067	16	11.7556	1.06111	13	11.1073	0.524955	11	11.5632	-0.169801	0	13	11.3267	0.464097	11	14.5604	-1.07351	8	11.8482	-1.36055	10	12.7321	-0.863979
1617	1	7	9.33061	-0.88089	8	9.76255	-0.623156	9	10.2529	-0.417623	11	9.16896	0.55208	0	12	9.31681	0.774569	17	11.715	1.28179	17	11.0615	1.4403	7	11.5201	-1.70845	0	9	11.3127	-0.770906	22	14.5763	1.58275	12	11.838	0.0467617	17	12.7472	1.03145
1618	0	14	9.35734	1.2408	9	9.75077	-0.250257	15	10.2346	1.23042	8	9.15296	-0.407631	0	11	9.30873	0.509936	11	11.7284	-0.219628	15	11.0624	1.01668	16	11.5302	1.11744	1	12	11.3499	0.187658	12	14.6194	-0.756147	13	11.8779	0.311224	16	12.7936	0.801589
1619	0	15	9.30695	1.46994	10	9.7082	0.0922742	16	10.1856	1.4536	7	9.11192	-0.798232	0	12	9.30992	0.77656	10	11.7236	-0.545053	15	11.0597	1.01739	12	11.5242	0.137362	0	12	11.3466	0.188636	18	14.5976	0.801958	12	11.8754	0.0359768	14	12.7793	0.326242
1620	0	13	9.25704	1.03811	10	9.66606	0.1056	9	10.1371	-0.379018	10	9.07131	0.293676	0	9	9.26215	-0.0873823	9	11.6833	-0.89442	19	11.0142	1.83206	11	11.4813	-0.145125	0	12	11.292	0.204374	10	14.5485	-1.43835	11	11.8229	-0.248101	6	12.7335	-2.74896
1621	0	9	9.25306	-0.084355	7	9.71538	-1.02632	13	10.1826	0.781411	10	9.1303	0.275024	0	7	9.21482	-0.837124	16	11.6433	1.08918	10	10.9692	-0.306502	7	11.4389	-1.67774	0	13	11.238	0.488686	16	14.4999	0.375036	12	11.7708	0.0661485	12	12.6883	-0.198682
1622	0	7	9.28038	-0.861903	9	9.70389	-0.23463	7	10.1649	-1.19621	7	9.11453	-0.799215	0	9	9.16793	-0.0559785	15	11.6037	0.876912	8	10.9247	-1.03403	6	11.3969	-2.20326	0	9	11.1845	-0.728169	21	14.4517	1.42895	6	11.7194	-2.33492	14	12.6434	0.362558
1623	1	11	9.23057	0.533503	14	9.66161	1.15948	11	10.1164	0.266419	8	9.07372	-0.379617	1	5	9.12149	-1.84318	12	11.5646	0.125704	14	10.8805	0.83371	11	11.3552	-0.107107	0	11	11.1315	-0.0396477	13	14.4041	-0.389418	7	11.6684	-1.76448	25	12.5991	2.48019
1624	0	13	9.18124	1.05913	8	9.61975	-0.572668	10	10.0684	-0.0216259	12	9.03334	0.856401	0	14	9.07547	1.31614	13	11.5257	0.408885	15	10.8368	1.07493	9	11.314	-0.771334	0	11	11.1191	-0.0359133	18	14.4212	0.843524	12	11.6597	0.0982236	15	12.6153	0.615718
1625	0	7	9.13238	-0.805964	15	9.57832	1.39987	12	10.0209	0.571329	12	8.99338	0.867938	0	8	9.02988	-0.364117	12	11.4873	0.147999	12	10.7935	0.348276	9	11.2732	-0.757721	0	8	11.1177	-1.10229	10	14.4013	-1.39181	10	11.6593	-0.524715	11	12.6028	-0.483248
1626	0	7	9.08399	-0.787676	10	9.5373	0.146319	16	9.9738	1.50655	17	8.95383	1.95148	0	7	8.98471	-0.750151	17	11.4493	1.34625	15	10.7507	1.09718	8	11.2327	-1.14294	0	9	11.0652	-0.688413	17	14.354	0.641742	6	11.6088	-2.28979	13	12.5587	0.122391
1627	0	10	9.08153	0.290445	16	9.58773	1.60307	6	10.0208	-1.64148	7	9.01386	-0.76117	0	15	8.93997	1.56469	9	11.4116	-0.803859	11	10.7082	0.0879829	12	11.1926	0.233064	0	16	11.0132	1.2467	18	14.3072	0.870394	9	11.5588	-0.852936	6	12.5151	-2.65979
1628	1	6	9.11034	-1.26979	12	9.57734	0.69936	8	10.0045	-0.708705	3	8.99913	-3.4636	0	7	8.93526	-0.731458	16	11.4277	1.14306	17	10.7124	1.52496	11	11.2057	-0.0620168	0	10	10.9617	-0.304108	21	14.2609	1.47059	10	11.5093	-0.477282	12	12.472	-0.136255
1629	0	9	9.06202	-0.0206718	10	9.53616	0.14668	16	9.95748	1.51063	15	8.95936	1.55969	0	11	8.93978	0.62118	7	11.4257	-1.67276	13	10.7129	0.63432	10	11.2025	-0.380274	0	5	10.9106	-2.64331	11	14.215	-0.969368	11	11.4603	-0.138777	14	12.4293	0.419782
1630	0	8	9.01415	-0.358558	4	9.49539	-2.74769	12	9.9109	0.603071	10	8.92	0.341525	0	8	8.89532	-0.316543	12	11.3881	0.176643	8	10.6707	-0.944239	17	11.1626	1.41578	0	13	10.86	0.593522	15	14.1696	0.214404	7	11.4117	-1.66748	16	12.3871	0.90323
1631	1	12	8.96675	0.875622	8	9.45503	-0.514431	13	9.86478	0.869553	9	8.88106	0.0396477	0	14	8.85127	1.37606	7	11.3508	-1.64447	9	10.6289	-0.542968	6	11.123	-2.09146	0	15	10.8099	1.08188	10	14.1247	-1.30433	12	11.3636	0.183699	9	12.3453	-1.11509
1632	0	11	8.96527	0.613494	12	9.50612	0.719922	11	9.91271	0.327831	6	8.94169	-1.20094	0	13	8.80763	1.16275	12	11.314	0.19804	6	10.5875	-1.87284	12	11.0838	0.264481	0	12	10.7603	0.357882	13	14.0801	-0.299579	15	11.316	0.951194	15	12.3039	0.696127
1633	0	5	8.99505	-1.78664	7	9.49638	-0.943542	10	9.89737	0.0324556	11	8.92755	0.624867	0	9	8.7644	0.0785325	13	11.2774	0.477749	12	10.5465	0.419592	15	11.045	1.02118	0	8	10.7111	-0.958508	11	14.0361	-0.915411	12	11.2689	0.211052	10	12.263	-0.715615
1634	1	14	8.94769	1.35029	6	9.45584	-1.41084	15	9.85125	1.3294	7	8.88836	-0.713734	0	10	8.72157	0.404274	18	11.2413	1.59304	6	10.5059	-1.83952	11	11.0065	-0.0019714	0	9	10.6623	-0.554112	19	13.9924	1.14881	19	11.2222	1.78435	12	12.2225	-0.0642178
1635	1	5	8.94624	-1.76481	8	9.50674	-0.532714	11	9.89917	0.331914	4	8.94876	-2.47438	0	9	8.67914	0.106952	17	11.2055	1.40538	12	10.4657	0.442927	13	10.9685	0.563449	0	12	10.6141	0.400089	9	13.9492	-1.64975	17	11.176	1.41253	11	12.1824	-0.356495
1636	0	10	8.97606	0.323798	10	9.49683	0.159117	6	9.88383	-1.58557	9	8.9344	0.0218684	0	11	8.63711	0.712439	13	11.17	0.507548	10	10.4258	-0.134656	6	10.9307	-2.01296	0	16	10.5662	1.35844	12	13.9065	-0.550353	13	11.1302	0.518589	8	12.1427	-1.46466
1637	0	14	8.92874	1.35535	5	9.45611	-1.99283	10	9.83771	0.0513217	8	8.89498	-0.316425	0	10	8.59546	0.444153	13	11.1349	0.517288	11	10.3864	0.185018	10	10.8934	-0.282508	0	16	10.5188	1.37029	20	13.8641	1.37202	11	11.0849	-0.0255876	11	12.1034	-0.33269
1638	1	12	8.92733	0.887004	13	9.50685	0.968827	5	9.88563	-2.18492	7	8.95516	-0.738982	0	6	8.55421	-1.04275	10	11.1001	-0.347887	8	10.3473	-0.829892	12	10.8564	0.33014	0	13	10.4719	0.701176	13	13.8222	-0.22804	9	11.04	-0.679991	4	12.0645	-4.03227
1639	0	8	9.00265	-0.354489	11	9.5878	0.425794	9	9.96388	-0.321294	6	9.03975	-1.24097	0	9	8.51333	0.162222	16	11.0657	1.23358	13	10.3086	0.746463	17	10.8197	1.49894	0	6	10.4254	-1.80664	11	13.7807	-0.838414	16	10.9955	1.25112	7	12.0261	-1.89968
1640	1	4	9.03163	-2.51582	7	9.57673	-0.973913	6	9.94764	-1.61162	10	9.02413	0.308598	0	9	8.47284	0.175721	10	11.0316	-0.32621	14	10.2703	0.996815	13	10.7834	0.614774	0	9	10.3793	-0.459756	11	13.7396	-0.826023	15	10.9515	1.04532	12	11.988	0.00345917
1641	0	13	8.98349	1.11398	13	9.53488	0.961052	12	9.90063	0.606036	10	8.98348	0.321451	0	16	8.43272	1.89182	18	10.9978	1.65044	12	10.2323	0.510292	18	10.7474	1.70945	0	11	10.3336	0.200925	11	13.6989	-0.813756	14	10.9079	0.826401	17	11.9504	1.22472
1642	0	11	8.98127	0.608669	11	9.58449	0.426793	12	9.94768	0.592454	13	9.04244	1.09763	0	7	8.39297	-0.526495	7	10.9643	-1.49838	11	10.1947	0.242808	14	10.7118	0.878803	0	10	10.2884	-0.0911897	17	13.6586	0.810399	9	10.8647	-0.621573	12	11.9131	0.0250963
1643	0	7	9.01034	-0.759836	9	9.5733	-0.1911	13	9.93148	0.851055	9	9.02665	-0.00888475	0	8	8.3536	-0.125015	14	10.9312	0.820165	12	10.1575	0.531895	14	10.6765	0.888233	0	7	10.2435	-1.22595	17	13.6188	0.820072	7	10.822	-1.44457	11	11.8762	-0.264174
1644	0	8	9.00772	-0.356284	9	9.62236	-0.207455	17	9.97809	1.70306	10	9.08502	0.289342	0	9	8.31459	0.228471	10	10.8984	-0.284106	15	10.1206	1.25986	13	10.6416	0.654105	0	11	10.1991	0.241469	12	13.5793	-0.455895	17	10.7796	1.50866	10	11.8397	-0.581749
1645	1	8	9.0364	-0.366421	6	9.61064	-1.47404	12	9.96147	0.588473	10	9.06865	0.29452	1	6	8.27594	-0.929147	16	10.8659	1.28351	4	10.084	-3.04203	10	10.607	-0.191942	0	13	10.1551	0.789022	11	13.5402	-0.76589	13	10.7377	0.627449	5	11.8035	-3.04262
1646	0	12	8.98794	0.869507	9	9.56813	-0.189377	21	9.91408	2.41914	12	9.02726	0.858156	0	8	8.23765	-0.0840203	14	10.8338	0.846211	8	10.0479	-0.724034	16	10.5727	1.35683	0	6	10.1115	-1.67853	17	13.5015	0.84852	13	10.6962	0.638965	17	11.7677	1.26901
1647	0	10	8.93996	0.335214	18	9.52607	1.99733	12	9.86717	0.615694	10	8.98632	0.320555	0	10	8.19971	0.569302	10	10.8019	-0.253587	11	10.0121	0.297879	11	10.5387	0.139079	0	13	10.0684	0.813092	14	13.4631	0.143483	11	10.6551	0.104003	6	11.7324	-2.34022
1648	0	9	8.89245	0.0358489	7	9.48444	-0.939031	10	9.82073	0.0566892	8	8.94581	-0.334395	1	6	8.16212	-0.882684	17	10.7704	1.51091	8	9.97656	-0.698819	12	10.5051	0.431544	0	7	10.0256	-1.14356	12	13.4252	-0.411416	4	10.6143	-3.30717	9	11.6973	-0.899105
1649	0	10	8.89087	0.350738	9	9.53428	-0.178095	7	9.86835	-1.08413	7	9.00491	-0.757786	0	8	8.12489	-0.0441547	9	10.7391	-0.579707	16	9.94141	1.51465	10	10.4718	-0.149186	0	13	9.98316	0.83672	17	13.3876	0.876131	10	10.574	-0.181522	10	11.6626	-0.525774
1650	0	9	8.92056	0.0264788	10	9.52332	0.150738	17	9.85271	1.73347	9	8.98927	0.00357723	0	14	8.12762	1.56946	10	10.7617	-0.240859	15	9.95289	1.30316	8	10.4915	-0.880876	0	10	9.94116	0.018608	10	13.3504	-1.0595	7	10.5341	-1.33576	10	11.6283	-0.514923
1651	0	14	8.87312	1.37022	8	9.48159	-0.523819	12	9.8063	0.633267	10	8.94861	0.33248	0	10	8.13951	0.588338	19	10.7659	1.88902	6	9.96057	-1.6169	14	10.495	0.936762	0	7	9.89954	-1.09592	14	13.3136	0.183452	7	10.4946	-1.32081	12	11.5944	0.117096
1652	1	12	8.82614	0.916214	11	9.44028	0.470274	11	9.76036	0.373766	4	8.90838	-2.45419	0	12	8.10235	1.12515	10	10.7346	-0.232296	9	9.92547	-0.308489	19	10.4616	1.95885	0	11	9.8583	0.344237	10	13.2771	-1.03632	9	10.4554	-0.485128	12	11.5608	0.126798
1653	0	10	8.77963	0.385915	8	9.3994	-0.494764	4	9.71488	-2.85744	13	8.86858	1.14585	0	13	8.10516	1.35759	20	10.757	2.06679	9	9.93699	-0.312329	16	10.4812	1.3797	0	13	9.81744	0.882684	15	13.241	0.454169	12	10.4166	0.457087	14	11.5275	0.660805
1654	0	3	8.73357	-3.31028	7	9.35895	-0.8916	9	9.66986	-0.223286	6	8.82921	-1.15502	0	9	8.11712	0.294292	8	10.7612	-0.976229	9	9.94472	-0.314906	13	10.4846	0.697646	0	10	9.77695	0.0705337	10	13.2053	-1.01359	8	10.3782	-0.84082	11	11.4946	-0.149119
1655	0	8	8.68797	-0.243234	6	9.31892	-1.35495	12	9.62529	0.68552	10	8.79026	0.382552	0	11	8.08004	0.880401	16	10.7297	1.31757	12	9.90966	0.60343	11	10.4511	0.16549	0	14	9.73684	1.13938	17	13.1699	0.928944	13	10.3402	0.737705	16	11.462	1.1345
1656	0	11	8.68827	0.697012	10	9.37035	0.199114	15	9.67476	1.37497	8	8.85091	-0.300841	0	8	8.0433	-0.0153087	14	10.6986	0.882338	16	9.87494	1.53127	11	10.418	0.175484	0	7	9.6971	-1.01941	13	13.1348	-0.0373915	8	10.3025	-0.814057	21	11.4297	2.0884
1657	0	6	8.71983	-1.11037	9	9.36095	-0.120318	7	9.66095	-1.00575	9	8.83679	0.0544036	1	11	8.0069	0.902452	12	10.6677	0.384586	13	9.84055	0.876273	11	10.3851	0.185383	0	8	9.65772	-0.586091	19	13.1001	1.35353	12	10.2652	0.500793	9	11.3978	-0.799274
1658	0	8	8.67424	-0.238381	16	9.32076	1.66981	12	9.61636	0.688097	7	8.79764	-0.679443	0	10	7.97085	0.641675	12	10.6372	0.393402	12	9.8065	0.633209	14	10.3526	0.974799	0	11	9.6187	0.416478	14	13.0658	0.249687	9	10.2283	-0.409421	11	11.3662	-0.110424
1659	0	8	8.6291	-0.22242	11	9.28099	0.5183	11	9.57222	0.430492	13	8.7589	1.17627	0	6	7.93513	-0.790012	7	10.607	-1.36331	9	9.77277	-0.257591	13	10.3204	0.743178	0	8	9.58004	-0.558628	16	13.0317	0.742066	4	10.1917	-3.09584	14	11.335	0.712259
1660	0	10	8.5844	0.447651	7	9.24164	-0.847259	15	9.52852	1.41273	18	8.72059	2.18718	0	7	7.89974	-0.340069	12	10.577	0.410776	9	9.73937	-0.246458	4	10.2885	-3.14427	0	4	9.54173	-2.77087	13	12.998	0.000540641	14	10.1555	1.0275	12	11.304	0.20091
1661	0	8	8.54015	-0.19097	8	9.20269	-0.425216	8	9.48527	-0.525121	10	8.68268	0.416572	0	9	7.86468	0.37844	13	10.5474	0.680235	11	9.70629	0.390067	9	10.2569	-0.418982	1	9	9.50377	-0.167925	17	12.9647	0.978704	10	10.1196	-0.0378143	14	11.2734	0.728713
1662	0	4	8.49633	-2.24816	11	9.16415	0.553529	11	9.44245	0.46962	11	8.64519	0.710003	0	7	7.86957	-0.328667	15	10.5715	1.14343	11	9.71982	0.38599	18	10.2784	1.82	0	10	9.46617	0.168813	17	12.9317	0.986714	12	10.084	0.553087	15	11.2431	0.970029
1663	1	9	8.45294	0.182355	13	9.12601	1.07445	9	9.40006	-0.133353	7	8.60809	-0.607802	0	5	7.88361	-1.28959	11	10.5773	0.127439	9	9.72954	-0.243178	6	10.2835	-1.74875	0	8	9.4289	-0.505193	9	12.899	-1.29966	11	10.0489	0.286778	16	11.2131	1.19673
1664	0	6	8.40997	-0.983868	11	9.08827	0.576407	7	9.3581	-0.891276	7	8.5714	-0.593932	0	12	7.84857	1.19842	15	10.5475	1.14962	13	9.69645	0.916241	13	10.2518	0.762201	0	15	9.39198	1.44799	14	12.8666	0.302914	17	10.014	1.69435	9	11.1834	-0.727801
1665	0	6	8.36744	-0.966502	9	9.05093	-0.0169754	8	9.31655	-0.465473	11	8.53509	0.743198	0	6	7.81386	-0.740505	8	10.518	-0.890257	6	9.66368	-1.49569	8	10.2204	-0.785044	0	6	9.35539	-1.36983	19	12.8345	1.41445	10	9.97951	0.00647911	3	11.154	-4.70772
1666	0	11	8.32532	0.806447	11	9.01397	0.598811	9	9.27543	-0.0918112	11	8.49918	0.754026	0	13	7.77947	1.44791	6	10.4888	-1.83255	3	9.63122	-3.82854	12	10.1893	0.522694	0	7	9.31914	-0.876553	17	12.8028	1.01797	8	9.94534	-0.68778	19	11.1249	1.80666
1667	0	5	8.32907	-1.48881	15	9.06843	1.53153	8	9.32831	-0.46963	9	8.56282	0.145726	0	11	7.74541	0.981296	5	10.4599	-2.44173	11	9.59908	0.422392	9	10.1585	-0.386177	0	8	9.32335	-0.467875	9	12.8357	-1.27857	8	9.95337	-0.69062	9	11.1563	-0.718768
1668	0	10	8.36405	0.517332	10	9.06204	0.296608	12	9.31789	0.774259	10	8.55167	0.458001	2	11	7.71166	0.991471	11	10.4312	0.17149	8	9.56725	-0.554108	6	10.128	-1.68526	0	8	9.33843	-0.473206	16	12.8314	0.792156	16	9.96941	1.50765	18	11.1587	1.61252
1669	0	9	8.32184	0.226053	13	9.02483	1.10251	10	9.27664	0.228746	6	8.51546	-1.02693	0	9	7.67823	0.440589	13	10.4029	0.720316	11	9.53573	0.441493	17	10.0978	1.67403	0	10	9.30219	0.220665	14	12.7995	0.320837	7	9.93524	-1.10942	11	11.1294	-0.0390251
1670	0	4	8.28005	-2.14002	10	8.98801	0.32002	12	9.23581	0.797953	10	8.47963	0.480782	0	5	7.64511	-1.18293	8	10.3748	-0.83961	10	9.50451	0.156686	6	10.0679	-1.66071	0	13	9.26629	1.03554	11	12.768	-0.533077	12	9.90141	0.605811	14	11.1005	0.774927
1671	0	16	8.23867	1.94033	6	8.95157	-1.20497	14	9.19539	1.28408	8	8.44419	-0.157046	0	8	7.61231	0.137071	7	10.347	-1.26503	13	9.4736	0.978048	7	10.0382	-1.14835	0	5	9.23072	-1.89204	14	12.7368	0.337602	6	9.8679	-1.57906	9	11.0718	-0.690615
1672	1	6	8.1977	-0.897206	15	8.91551	1.57101	10	9.15538	0.267092	8	8.40913	-0.144651	0	6	7.5798	-0.644952	13	10.3194	0.743459	15	9.44298	1.43482	8	10.0089	-0.710251	1	18	9.19547	2.07525	11	12.7059	-0.51435	17	9.83472	1.73784	8	11.0435	-1.07604
1673	0	6	8.15713	-0.880644	8	8.87982	-0.311065	18	9.11577	2.09403	7	8.37445	-0.519494	0	8	7.65062	0.123525	13	10.4312	0.712454	14	9.533	1.19386	8	10.1169	-0.748447	0	7	9.16055	-0.816611	13	12.6753	0.0900528	8	9.80186	-0.637055	12	11.0154	0.284218
1674	0	11	8.11696	0.869269	9	8.84451	0.051829	2	9.07657	-5.00389	6	8.34014	-0.955359	0	14	7.74467	1.67181	10	10.495	-0.156527	9	9.61259	-0.204196	13	10.1821	0.781534	0	8	9.12594	-0.398081	9	12.645	-1.215	10	9.76932	0.0729473	10	10.9877	-0.312329
1675	0	12	8.07719	1.13242	10	8.80957	0.376447	11	9.03775	0.591639	4	8.3062	-2.1531	0	10	7.7106	0.723973	9	10.4656	-0.488541	13	9.58036	0.948437	14	10.151	1.02869	0	9	9.09165	-0.030551	12	12.615	-0.177541	16	9.73709	1.56573	10	10.9602	-0.303638
1676	0	6	8.08327	-0.850491	5	8.86603	-1.72894	10	9.09292	0.286844	10	8.3718	0.514883	1	8	7.67685	0.114252	9	10.4366	-0.478852	9	9.54845	-0.182816	14	10.1201	1.03694	1	11	9.05768	0.585633	11	12.5853	-0.477992	10	9.70518	0.0932308	8	10.933	-1.03697
1677	0	9	8.12055	0.29315	7	8.86162	-0.703626	9	9.08476	-0.0282529	12	8.36258	1.05003	0	12	7.64341	1.25764	7	10.4078	-1.28802	6	9.51685	-1.43575	10	10.0896	-0.0283257	1	13	9.02401	1.10274	13	12.5559	0.123168	9	9.67357	-0.224524	6	10.9061	-2.00289
1678	1	7	8.08062	-0.408436	12	8.82636	0.916151	8	9.04575	-0.36973	8	8.32828	-0.116063	0	9	7.6103	0.463234	19	10.3793	1.97773	14	9.48555	1.20654	15	10.0593	1.27568	0	8	9.03078	-0.364437	16	12.5911	0.852215	14	9.68415	1.15346	12	10.9396	0.306117
1679	0	9	8.04109	0.319638	19	8.79147	2.342	6	9.00714	-1.22766	13	8.29434	1.30511	0	14	7.57749	1.71649	10	10.3511	-0.111021	7	9.45457	-0.927738	11	10.0294	0.29266	0	6	9.0484	-1.2445	8	12.5891	-1.62249	13	9.7027	0.914505	12	10.9441	0.30482
1680	0	7	8.00194	-0.378699	7	8.75695	-0.664064	8	8.96892	-0.342566	9	8.26078	0.246408	0	6	7.545	-0.630743	6	10.3232	-1.76492	7	9.42388	-0.916139	16	9.99969	1.50008	0	10	9.01468	0.311586	10	12.5595	-0.809392	8	9.67103	-0.5908	9	10.9169	-0.638976
1681	0	9	7.96319	0.345605	11	8.72279	0.686606	11	8.93109	0.623801	7	8.22757	-0.463978	0	6	7.55243	-0.633777	12	10.349	0.476606	13	9.43977	0.987429	8	10.023	-0.715254	0	6	8.98127	-1.2171	22	12.5303	2.01896	9	9.63967	-0.213224	9	10.8901	-0.630022
1682	0	5	7.97027	-1.32835	10	8.78002	0.385793	7	8.98722	-0.7511	5	8.29389	-1.47307	0	13	7.56899	1.50629	19	10.3565	1.98295	6	9.45184	-1.40921	12	10.0301	0.568659	0	12	8.9883	0.869403	16	12.5656	0.858598	8	9.65049	-0.583537	17	10.9236	1.47373
1683	0	16	8.00855	1.99786	8	8.77637	-0.274489	8	8.98002	-0.34649	7	8.2854	-0.485835	0	8	7.53645	0.163889	11	10.3284	0.202491	14	9.42109	1.22377	11	10.0003	0.301427	0	7	9.0463	-0.773429	11	12.628	-0.490872	11	9.71117	0.388598	8	10.9884	-1.05654
1684	0	4	7.96961	-1.9848	8	8.74187	-0.262292	5	8.94197	-1.7629	8	8.25181	-0.0890286	0	11	7.50422	1.05402	13	10.3006	0.748684	12	9.39063	0.75326	7	9.97075	-1.12284	0	8	9.0635	-0.376005	18	12.6254	1.26681	8	9.72929	-0.611398	12	10.9921	0.290947
1685	0	9	7.93105	0.356316	13	8.70774	1.19046	9	8.9043	0.0319001	9	8.21859	0.260471	0	10	7.4723	0.799328	10	10.273	-0.0863392	7	9.36047	-0.892174	16	9.9415	1.51463	0	9	9.02938	-0.00979296	11	12.5952	-0.480976	8	9.6972	-0.60005	5	10.9643	-2.66731
1686	0	9	7.89288	0.36904	6	8.67396	-1.09164	10	8.86701	0.358282	8	8.18572	-0.0656618	0	9	7.44068	0.519773	15	10.2457	1.22754	8	9.33061	-0.470441	7	9.91254	-1.10084	1	8	8.99557	-0.351987	10	12.5654	-0.811237	11	9.66542	0.402392	9	10.9367	-0.645576
1687	0	8	7.85508	0.0512356	4	8.64054	-2.32027	9	8.8301	0.0566317	4	8.15321	-2.0766	0	8	7.40936	0.208823	6	10.2187	-1.72229	8	9.30104	-0.459985	10	9.88387	0.0367244	0	9	8.96207	0.0126425	15	12.5358	0.636256	10	9.63395	0.115757	18	10.9095	1.67126
1688	1	4	7.81766	-1.90883	11	8.60746	0.721377	7	8.79357	-0.677906	10	8.12105	0.594177	0	9	7.37833	0.540555	16	10.192	1.452	6	9.27175	-1.33569	15	9.85547	1.32831	0	7	8.92888	-0.729049	14	12.5065	0.399149	11	9.60278	0.421278	11	10.8825	0.0354349
1689	0	11	7.78061	0.970682	13	8.57474	1.22735	9	8.7574	0.0808655	8	8.08924	-0.0315494	0	8	7.3476	0.230658	14	10.1655	1.0248	11	9.24275	0.52983	15	9.82736	1.33557	0	8	8.896	-0.316784	17	12.4775	1.09686	7	9.57192	-0.972093	10	10.8558	-0.270619
1690	1	8	7.74393	0.0905341	6	8.54236	-1.03791	7	8.7216	-0.650705	5	8.05777	-1.36747	1	13	7.31716	1.57614	10	10.1393	-0.0440585	6	9.21404	-1.31212	8	9.79951	-0.636224	0	15	8.86342	1.58446	10	12.4489	-0.774396	15	9.54135	1.40942	11	10.8293	0.0514542
1691	0	5	7.70761	-1.21088	7	8.51031	-0.570844	6	8.68617	-1.09662	11	8.02664	0.896503	0	9	7.287	0.570998	8	10.1134	-0.747192	11	9.1856	0.547062	7	9.77194	-1.0477	0	18	8.83114	2.16112	8	12.4205	-1.56287	10	9.51109	0.154607	18	10.8032	1.6963
1692	0	9	7.71711	0.427631	5	8.56964	-1.59639	13	8.74468	1.18022	8	8.09502	-0.0335927	0	5	7.25713	-1.00942	8	10.0877	-0.73811	7	9.15744	-0.815437	12	9.74464	0.651066	1	15	8.83929	1.59069	9	12.4567	-1.15223	8	9.523	-0.538461	11	10.8375	0.0490032
1693	0	7	7.75777	-0.286412	14	8.56807	1.45174	9	8.73982	0.0867249	10	8.08855	0.604453	0	8	7.22755	0.273103	13	10.0623	0.814784	11	9.12956	0.56396	8	9.71761	-0.607265	2	6	8.85827	-1.16688	13	12.4556	0.150983	12	9.54288	0.70931	12	10.8427	0.334076
1694	0	13	7.76666	1.45147	5	8.62667	-1.62189	11	8.79769	0.664023	9	8.15615	0.281284	0	10	7.19824	0.885995	13	10.0371	0.821768	9	9.10195	-0.0339816	10	9.69083	0.0977672	0	11	8.8259	0.655515	7	12.427	-2.05123	12	9.51252	0.718074	17	10.8163	1.49976
1695	0	9	7.80672	0.39776	11	8.62437	0.716279	8	8.79219	-0.280083	2	8.14891	-4.34794	0	4	7.20883	-1.60441	12	10.0656	0.558405	6	9.12089	-1.2741	12	9.71706	0.659029	0	9	8.79384	0.0687208	14	12.3987	0.427954	7	9.48245	-0.93828	16	10.7902	1.30244
1696	0	6	7.76954	-0.722413	6	8.59121	-1.05786	16	8.75584	1.81104	8	8.11657	-0.0412149	0	9	7.22851	0.590496	11	10.0759	0.278638	8	9.13597	-0.401626	12	9.72696	0.656171	0	10	8.76207	0.391468	14	12.3707	0.435441	9	9.45268	-0.150895	7	10.7644	-1.42281
1697	0	2	7.73274	-4.05366	5	8.5584	-1.59136	11	8.71985	0.687492	7	8.08459	-0.409935	0	4	7.19907	-1.59954	8	10.0504	-0.724932	8	9.1082	-0.391809	15	9.69995	1.36847	0	6	8.73059	-1.11476	11	12.343	-0.404929	9	9.4232	-0.141069	9	10.7388	-0.579606
1698	0	10	7.6963	0.728494	11	8.52594	0.745958	7	8.68422	-0.636577	3	8.05294	-2.91732	0	5	7.16991	-0.970415	8	10.0252	-0.716026	4	9.0807	-2.54035	11	9.6732	0.400046	0	9	8.73954	0.0868209	11	12.3799	-0.416052	9	9.43589	-0.145296	15	10.7737	1.09123
1699	0	6	7.66023	-0.677785	10	8.49382	0.476297	8	8.64896	-0.229443	6	8.02165	-0.825335	0	4	7.14103	-1.57052	11	10.0003	0.301424	12	9.05347	0.850589	9	9.64671	-0.215571	0	8	8.86118	-0.304474	12	12.5428	-0.156701	9	9.56284	-0.187613	9	10.9322	-0.644071
1700	0	9	7.62451	0.458496	6	8.46203	-1.00512	8	8.61406	-0.217104	10	7.99069	0.635399	0	7	7.11242	-0.0424915	6	9.9756	-1.62303	11	9.02651	0.595029	10	9.62049	0.120012	0	5	8.95823	-1.77017	15	12.5829	0.624099	9	9.65904	-0.219681	12	10.9847	0.293082
1701	0	10	7.58915	0.762377	14	8.43059	1.48849	11	8.57952	0.729803	11	7.96007	0.916573	0	7	7.08408	-0.0317804	12	9.95116	0.59145	12	8.99981	0.86608	10	9.59452	0.128224	0	6	8.92449	-1.19392	12	12.5526	-0.159532	9	9.62727	-0.209091	12	10.9565	0.301222
1702	0	7	7.55414	-0.209446	12	8.39947	1.03938	12	8.54532	0.99728	11	7.92978	0.925705	0	14	7.05601	1.85586	14	9.92696	1.08857	7	8.97337	-0.745865	10	9.56881	0.136355	0	7	8.89107	-0.714756	7	12.5227	-2.08738	7	9.59582	-0.981126	3	10.9286	-4.5776
1703	0	5	7.51948	-1.12675	11	8.36869	0.79337	6	8.51148	-1.0253	12	7.89983	1.18362	0	7	7.02821	-0.0106614	14	9.903	1.09497	6	8.94719	-1.20319	3	9.54334	-3.7778	0	7	8.85796	-0.702242	7	12.4931	-2.07619	8	9.56467	-0.553194	16	10.901	1.27474
1704	0	3	7.48517	-2.58951	10	8.33823	0.525499	12	8.47797	1.01672	9	7.87019	0.376603	0	7	7.00066	-0.000251417	17	9.87928	1.72703	12	8.92127	0.888753	10	9.51813	0.15238	0	7	8.82516	-0.689845	7	12.4637	-2.0651	10	9.53383	0.147417	12	10.8737	0.32513
1705	0	5	7.45119	-1.09621	9	8.30809	0.230638	11	8.44481	0.770419	9	7.84088	0.386374	0	6	6.97338	-0.397382	7	9.8558	-1.07939	10	8.8956	0.349243	13	9.49316	0.972621	0	6	8.79266	-1.1401	13	12.4347	0.156784	13	9.50329	0.969813	14	10.8467	0.842756
1706	0	6	7.41756	-0.578715	17	8.27826	2.11533	13	8.41198	1.27249	8	7.81188	0.0665096	0	8	6.94636	0.372518	6	9.83255	-1.56463	9	8.87017	0.0432749	7	9.46844	-0.932984	0	10	8.76047	0.391973	15	12.406	0.669775	11	9.47306	0.460391	11	10.82	0.0542848
1707	0	10	7.38425	0.827171	12	8.24875	1.08289	6	8.37949	-0.971422	10	7.7832	0.701013	0	4	6.91959	-1.45979	8	9.80954	-0.639768	12	8.845	0.91077	7	9.44396	-0.923731	0	8	8.72858	-0.257593	14	12.3775	0.433625	15	9.44312	1.43478	6	10.7935	-1.95694
1708	0	6	7.35128	-0.551659	15	8.21955	1.7507	8	8.34732	-0.122798	9	7.75483	0.415056	0	6	6.89307	-0.364596	10	9.78675	0.0674353	8	8.82007	-0.28994	9	9.41972	-0.139907	0	7	8.69699	-0.641402	19	12.3494	1.52576	11	9.41347	0.478356	11	10.7673	0.0701532
1709	0	10	7.31864	0.84792	3	8.19066	-2.99683	13	8.31549	1.29925	6	7.72677	-0.70495	0	10	6.86681	0.990802	11	9.76419	0.372611	14	8.79539	1.39099	9	9.39572	-0.131906	0	10	8.66569	0.421945	16	12.3215	0.919627	6	9.38412	-1.38156	11	10.7414	0.0779617
1710	0	12	7.28632	1.36072	7	8.16207	-0.439223	14	8.28397	1.52767	9	7.69901	0.433664	0	6	6.84079	-0.343251	7	9.74185	-1.03632	8	8.77095	-0.272571	11	9.37195	0.490877	0	11	8.63469	0.713169	11	12.2939	-0.390127	3	9.35506	-3.66909	11	10.7158	0.0856877
1711	0	8	7.25432	0.263637	6	8.13379	-0.871115	9	8.25278	0.249073	3	7.67155	-2.69712	0	11	6.81502	1.26182	7	9.71974	-1.02797	10	8.74674	0.396315	9	9.34841	-0.116136	0	5	8.60397	-1.61174	11	12.2666	-0.381892	9	9.32628	-0.108759	5	10.6905	-2.54485
1712	0	11	7.22264	1.13892	5	8.1058	-1.38895	11	8.2219	0.837628	4	7.64438	-1.82219	0	11	6.78949	1.26952	7	9.69785	-1.01969	7	8.72277	-0.651146	5	9.3251	-1.93424	0	7	8.57353	-0.59474	12	12.2396	-0.0691542	7	9.29778	-0.86848	15	10.6654	1.1192
1713	0	10	7.19127	0.888197	11	8.0781	0.880985	7	8.19134	-0.450284	8	7.61752	0.135229	0	8	6.7642	0.436921	7	9.67617	-1.0115	9	8.69904	0.100321	16	9.30202	1.6745	0	10	8.54339	0.460622	9	12.2128	-1.07093	9	9.26957	-0.0898555	9	10.6405	-0.546848
1714	0	5	7.16022	-0.966078	12	8.0507	1.14007	9	8.16108	0.279639	7	7.59094	-0.223353	0	8	6.73915	0.445778	8	9.65471	-0.585029	6	8.67553	-1.09228	6	9.27916	-1.33871	1	10	8.51352	0.470067	13	12.1863	0.225678	9	9.24163	-0.0805426	11	10.616	0.115785
1715	0	7	7.12947	-0.0489347	9	8.02358	0.325473	4	8.13114	-2.06557	7	7.56464	-0.213416	0	6	6.71434	-0.291627	9	9.63347	-0.211155	8	8.65226	-0.230607	6	9.25653	-1.32947	0	19	8.48393	2.41255	19	12.1601	1.56918	11	9.21396	0.53851	17	10.5917	1.55425
1716	0	8	7.09903	0.318543	6	7.99675	-0.815169	12	8.10149	1.1254	5	7.53864	-1.13531	1	11	6.68976	1.29959	16	9.61243	1.59689	10	8.62921	0.433483	10	9.23411	0.242194	0	8	8.45461	-0.160729	17	12.1341	1.18015	10	9.18657	0.257228	8	10.5676	-0.907798
1717	0	8	7.06888	0.329199	3	7.9702	-2.86954	8	8.07215	-0.0255069	12	7.51291	1.29531	0	12	6.66541	1.53996	8	9.5916	-0.562716	9	8.60638	0.131207	10	9.21192	0.249213	0	6	8.42557	-0.990233	14	12.1084	0.505543	15	9.15945	1.50802	9	10.5439	-0.514616
1718	1	15	7.03904	2.05551	5	7.94392	-1.31656	14	8.0431	1.59205	7	7.48746	-0.184242	0	6	6.64129	-0.261804	11	9.57098	0.430865	11	8.58378	0.728518	11	9.18994	0.545754	0	12	8.39679	1.04016	13	12.083	0.254331	8	9.13259	-0.400432	23	10.5203	2.6022
1719	0	8	7.00949	0.350197	7	7.91793	-0.346943	5	8.01434	-1.34806	11	7.46228	1.06666	0	5	6.61739	-0.723321	18	9.55057	1.99155	9	8.56139	0.146202	12	9.16817	0.817477	0	8	8.36828	-0.130208	11	12.0578	-0.318944	14	9.106	1.30798	18	10.497	1.76847
1720	0	8	6.98024	0.36054	13	7.8922	1.41665	15	7.98588	1.81104	14	7.43738	1.75393	0	7	6.59373	0.153557	9	9.53035	-0.176784	4	8.53923	-2.26961	10	9.14662	0.269862	0	4	8.38017	-2.19009	17	12.0972	1.18909	4	9.12154	-2.56077	13	10.5341	0.683909
1721	0	9	6.95127	0.682909	9	7.86674	0.377752	11	7.9577	0.917287	5	7.41274	-1.07901	0	5	6.6099	-0.719971	10	9.56382	0.137931	15	8.56357	1.66188	9	9.17801	-0.0593367	0	11	8.40286	0.783067	14	12.0993	0.507971	6	9.14503	-1.28395	9	10.5422	-0.514063
1722	0	7	6.96805	0.0120758	9	7.93259	0.355802	7	8.0234	-0.38681	5	7.48755	-1.11247	0	10	6.63512	1.06407	10	9.57892	0.133157	6	8.58399	-1.05491	7	9.19303	-0.828887	1	13	8.37417	1.28297	14	12.0739	0.514771	8	9.11824	-0.395357	10	10.5186	-0.16399
1723	0	11	7.01593	1.20124	11	7.93748	0.923386	9	8.02567	0.324777	8	7.48744	0.181218	0	13	6.61116	1.77194	8	9.5583	-0.550941	11	8.56151	0.735232	17	9.17108	1.89879	0	3	8.34575	-3.08637	10	12.0487	-0.647861	5	9.09171	-1.82987	10	10.4952	-0.156604
1724	0	8	6.98649	0.35833	9	7.91141	0.362862	5	7.99698	-1.34029	7	7.46215	-0.174675	0	10	6.58743	1.07915	8	9.53788	-0.543722	9	8.53925	0.153583	5	9.14935	-1.85564	0	11	8.3176	0.808774	13	12.0238	0.270753	10	9.06545	0.29553	12	10.4721	0.441063
1725	0	10	6.95735	0.962172	10	7.88563	0.668623	11	7.96859	0.914003	7	7.43713	-0.16522	0	6	6.56393	-0.230223	9	9.51766	-0.172554	4	8.51721	-2.2586	20	9.12783	2.43109	0	9	8.2897	0.236765	5	11.9991	-3.13009	15	9.03945	1.53901	8	10.4492	-0.86594
1726	0	11	6.92849	1.22761	11	7.86011	0.946712	6	7.94049	-0.792202	7	7.41238	-0.155866	0	7	6.54064	0.17362	12	9.49765	0.722367	15	8.49538	1.67949	12	9.10652	0.835276	0	7	8.26207	-0.477017	8	11.9747	-1.40526	4	9.0137	-2.50685	8	10.4266	-0.857941
1727	0	7	6.89992	0.0378254	8	7.83487	0.0583837	4	7.91267	-1.95634	9	7.38791	0.537365	0	6	6.51758	-0.211302	6	9.47784	-1.41982	8	8.47376	-0.167501	9	9.08542	-0.0284732	0	10	8.23469	0.558239	14	11.9505	0.547753	9	8.9882	0.00393423	12	10.4042	0.460657
1728	0	7	6.87164	0.048516	12	7.80989	1.20958	10	7.88514	0.668778	8	7.36369	0.224969	0	7	6.49474	0.190972	15	9.45822	1.43088	10	8.45236	0.489407	15	9.06453	1.53253	1	12	8.2477	1.0832	12	11.9909	0.00262528	11	9.00483	0.601567	15	10.4422	1.17681
1729	0	6	6.84363	-0.344413	5	7.78517	-1.24556	11	7.85788	0.947385	9	7.33974	0.55342	0	7	6.47211	0.199525	17	9.4388	1.83386	12	8.43117	1.03023	11	9.04384	0.589805	0	8	8.2715	-0.0959893	21	11.994	1.96527	4	9.02939	-2.51469	12	10.4512	0.447102
1730	0	8	6.81591	0.418639	8	7.76071	0.0846022	8	7.8309	0.0597855	10	7.31605	0.84874	0	8	6.44969	0.548118	9	9.41957	-0.139857	11	8.41018	0.780861	9	9.02335	-0.00778325	0	8	8.24391	-0.0862355	9	11.9695	-0.989838	13	9.00366	1.10838	16	10.4285	1.39288
1731	0	13	6.78846	1.72277	10	7.73651	0.715779	5	7.80419	-1.25407	14	7.29261	1.79262	0	8	6.42748	0.555968	17	9.40053	1.84314	12	8.3894	1.04229	12	9.00306	0.865142	0	12	8.21658	1.09218	14	11.9453	0.549145	12	8.97819	0.872321	9	10.406	-0.46866
1732	0	3	6.76128	-2.17158	12	7.71256	1.23768	7	7.77776	-0.293966	15	7.26943	1.99602	1	3	6.40549	-1.96616	18	9.38169	2.03136	6	8.36881	-0.967064	18	8.98297	2.12533	0	14	8.18951	1.55292	12	11.9213	0.0227165	10	8.95298	0.331098	13	10.3837	0.725622
1733	0	10	6.73437	1.03268	13	7.68886	1.47304	6	7.75159	-0.715085	5	7.2465	-1.00466	0	6	6.3837	-0.156646	14	9.36303	1.23928	7	8.34843	-0.50966	15	8.96308	1.55873	0	8	8.16268	-0.057517	18	11.8976	1.43836	13	8.92801	1.12937	16	10.3617	1.40957
1734	0	10	6.70773	1.04111	13	7.66542	1.47955	7	7.72569	-0.274285	5	7.22381	-0.994518	0	2	6.36212	-3.08448	6	9.34456	-1.36541	6	8.32825	-0.950506	7	8.94338	-0.734529	0	10	8.17624	0.576723	10	11.9384	-0.612983	12	8.94516	0.881857	8	10.4001	-0.848564
1735	0	10	6.68135	1.04945	15	7.64222	1.89977	10	7.70005	0.727308	12	7.20137	1.38525	0	9	6.34074	0.88642	4	9.32627	-2.66313	8	8.30827	-0.10899	11	8.92388	0.625975	0	10	8.20058	0.569025	15	11.9419	0.789587	8	8.97023	-0.343029	9	10.4094	-0.469805
1736	0	6	6.65523	-0.267498	5	7.61926	-1.17137	11	7.67467	1.00263	9	7.17917	0.606943	1	6	6.31956	-0.130461	11	9.30816	0.510109	10	8.28848	0.54123	12	8.90456	0.893577	0	8	8.17354	-0.061355	20	11.9179	1.80721	15	8.94502	1.56339	21	10.3871	2.31594
1737	1	6	6.62938	-0.256942	16	7.59654	2.10087	10	7.64955	0.743279	9	7.15721	0.614263	0	9	6.33821	0.887264	11	9.34372	0.499388	11	8.31517	0.809508	13	8.93816	1.12655	0	10	8.14674	0.586051	13	11.8941	0.30672	8	8.92006	-0.325291	11	10.3649	0.191482
1738	0	3	6.60377	-2.08064	5	7.57406	-1.15115	12	7.62468	1.26305	12	7.13549	1.40426	0	8	6.36587	0.577752	11	9.36088	0.494213	9	8.33793	0.220692	14	8.95538	1.34823	0	12	8.1202	1.12	16	11.8705	1.03236	15	8.89535	1.57621	8	10.343	-0.828389
1739	0	12	6.57843	1.56507	9	7.55182	0.482727	13	7.60006	1.49767	14	7.114	1.84036	0	7	6.34434	0.247818	8	9.3423	-0.474575	11	8.31775	0.808728	9	8.9356	0.0214653	1	7	8.09391	-0.413458	19	11.8472	1.64096	8	8.87088	-0.307901	16	10.3214	1.41965
1740	0	15	6.55333	2.18092	11	7.52981	1.0463	12	7.57569	1.27719	5	7.09274	-0.935903	0	10	6.32301	1.16277	8	9.32391	-0.468072	11	8.29778	0.814751	6	8.91602	-1.19046	0	9	8.06786	0.310714	10	11.8242	-0.57685	14	8.84665	1.37729	8	10.3	-0.813156
1741	0	8	6.57394	0.504189	8	7.59906	0.141753	4	7.64516	-1.82258	9	7.17089	0.609704	0	9	6.3415	0.886167	4	9.35918	-2.67959	10	8.32428	0.529908	8	8.94937	-0.335653	0	4	8.04205	-2.02103	11	11.8013	-0.241607	8	8.82266	-0.290853	14	10.2788	0.994545
1742	0	6	6.62561	-0.255402	5	7.60732	-1.16603	6	7.65115	-0.67408	9	7.17409	0.608638	2	7	6.36901	0.238491	18	9.37607	2.03268	10	8.34686	0.522769	17	8.96633	1.94845	0	11	8.01648	0.899564	12	11.7787	0.0638811	12	8.7989	0.924077	15	10.2578	1.22444
1743	0	11	6.59992	1.32667	11	7.5846	1.02978	7	7.62616	-0.236667	6	7.15207	-0.470329	1	8	6.34733	0.584306	7	9.35722	-0.890945	10	8.32651	0.529204	17	8.94631	1.95331	0	11	7.99116	0.9072	16	11.7563	1.06092	7	8.77538	-0.671032	16	10.237	1.44074
1744	0	7	6.5745	0.160826	8	7.56211	0.154817	18	7.60142	2.45097	11	7.13028	1.16676	0	10	6.32586	1.16187	7	9.33855	-0.883891	12	8.30636	1.06626	9	8.92648	0.024505	1	11	7.96607	0.914766	7	11.7342	-1.78935	12	8.7521	0.937589	17	10.2165	1.64524
1745	0	9	6.54932	0.816893	7	7.53986	-0.20405	11	7.57694	1.03209	11	7.10874	1.17326	0	6	6.30459	-0.124348	13	9.32008	1.02063	6	8.28641	-0.933423	16	8.90686	1.77329	0	9	7.98134	0.339553	12	11.7766	0.0644895	8	8.77092	-0.27256	5	10.2563	-2.35071
1746	0	6	6.5244	-0.214084	11	7.51785	1.04991	5	7.5527	-1.1416	6	7.08742	-0.443939	1	4	6.28352	-1.14176	13	9.30179	1.0257	9	8.26666	0.244448	11	8.88742	0.636965	0	7	8.00738	-0.380756	19	11.7817	1.656	9	8.79764	0.0674521	14	10.2671	0.997658
1747	0	7	6.49972	0.189088	4	7.49607	-1.74804	3	7.52871	-2.61465	7	7.06634	-0.0250754	0	6	6.36568	-0.149286	7	9.42275	-0.915713	7	8.36744	-0.516842	11	9.00529	0.601428	0	5	7.98202	-1.3336	10	11.7592	-0.5563	5	8.77407	-1.68781	13	10.2462	0.763773
1748	1	4	6.47529	-1.23765	8	7.47452	0.185785	6	7.50497	-0.6144	7	7.04549	-0.0171935	0	8	6.51058	0.526589	7	9.54909	-0.963465	10	8.50398	0.473085	17	9.13297	1.90803	1	11	7.9569	0.91753	13	11.7369	0.35032	7	8.75072	-0.661712	9	10.2255	-0.408491
1749	0	3	6.4511	-1.99249	10	7.4532	0.80537	3	7.48146	-2.58737	9	7.02486	0.658379	0	10	6.53608	1.09539	11	9.56365	0.433077	14	8.52448	1.4634	8	9.14763	-0.405747	0	4	7.93201	-1.966	18	11.7149	1.48142	9	8.72761	0.0907955	17	10.205	1.64803
1750	0	6	6.42715	-0.174384	9	7.4321	0.522635	7	7.45819	-0.173181	9	7.00446	0.665181	1	6	6.51241	-0.209192	13	9.54249	0.95894	13	8.50207	1.2475	7	9.12533	-0.803297	0	9	7.94748	0.350839	6	11.7574	-2.35044	9	8.74661	0.0844647	11	10.2449	0.227677
1751	0	11	6.40344	1.38592	13	7.41122	1.55005	8	7.43516	0.1997	9	6.98427	0.671909	0	9	6.5286	0.823801	13	9.57504	0.949914	14	8.52618	1.46294	14	9.15598	1.29462	2	9	7.97372	0.342092	16	11.7626	1.05936	11	8.77351	0.671313	12	10.2557	0.503538
1752	1	6	6.42542	-0.173679	5	7.4816	-1.1098	10	7.50596	0.788686	11	7.06348	1.18691	0	12	6.55383	1.57217	10	9.58923	0.129896	6	8.54639	-1.03956	8	9.17029	-0.41376	0	13	7.94856	1.40102	16	11.7402	1.06496	13	8.7501	1.17871	6	10.2348	-1.72886
1753	0	8	6.47845	0.537948	7	7.49096	-0.185566	18	7.51326	2.47175	7	7.06773	-0.0255997	1	8	6.52989	0.519761	8	9.56772	-0.554272	11	8.52369	0.746635	17	9.14765	1.90447	0	15	7.92363	1.82711	17	11.718	1.28107	10	8.72693	0.40258	14	10.2142	1.01181
1754	0	7	6.45412	0.206323	4	7.46934	-1.73467	12	7.48957	1.30205	6	7.04675	-0.427334	0	7	6.50619	0.186642	8	9.54643	-0.546745	10	8.50123	0.473953	14	9.12524	1.30283	0	14	7.93907	1.61985	14	11.7604	0.598556	9	8.74587	0.0847117	17	10.2539	1.63617
1755	0	9	6.43003	0.856657	10	7.44794	0.807032	10	7.46612	0.801283	11	7.026	1.19821	0	4	6.52234	-1.26117	18	9.57884	1.98489	6	8.52527	-1.03094	18	9.15579	2.0846	0	9	7.96528	0.344906	16	11.7655	1.05863	6	8.77271	-1.13195	16	10.2645	1.43387
1756	0	11	6.45163	1.37138	6	7.51781	-0.619643	9	7.5365	0.487834	10	7.10465	0.915591	0	7	6.54754	0.171013	9	9.59291	-0.197636	8	8.54542	-0.192836	14	9.16999	1.29087	0	6	7.94008	-0.792036	13	11.743	0.348641	14	8.74925	1.40332	13	10.2435	0.764521
1757	1	9	6.50429	0.831902	8	7.52667	0.167346	10	7.5434	0.776845	9	7.10835	0.630552	0	5	6.52358	-0.681365	12	9.57127	0.701114	3	8.52267	-3.18852	10	9.14724	0.269666	1	8	8.017	-0.00601014	13	11.884	0.309517	8	8.83232	-0.29427	18	10.3754	1.79714
1758	0	10	6.47959	1.11325	12	7.50455	1.29772	10	7.51931	0.784464	7	7.08682	-0.0328155	0	15	6.53947	2.1845	14	9.60334	1.17506	15	8.54643	1.6663	9	9.17746	-0.0591539	1	9	8.1209	0.293035	13	11.9299	0.29678	9	8.93512	0.0216252	8	10.4331	-0.86024
1759	0	9	6.45514	0.848287	11	7.48267	1.06052	5	7.49546	-1.116	16	7.06553	2.23362	0	9	6.56442	0.811862	9	9.61706	-0.205687	7	8.5663	-0.592007	8	9.19134	-0.421201	0	7	8.09395	-0.413476	11	11.9055	-0.273027	8	8.90989	-0.321696	5	10.4101	-2.41947
1760	1	4	6.43093	-1.21547	5	7.46102	-1.1006	10	7.47186	0.799469	9	7.04448	0.651841	0	12	6.5402	1.57611	5	9.59508	-2.05498	10	8.54328	0.460656	11	9.16827	0.552288	0	8	8.06727	-0.0237833	11	11.8814	-0.265742	12	8.88491	0.899248	10	10.3873	-0.122485
1761	0	5	6.45242	-0.649544	4	7.53064	-1.76532	10	7.54208	0.777261	8	7.12283	0.310128	0	6	6.51622	-0.210745	10	9.57334	0.134923	14	8.52049	1.46446	8	9.14544	-0.404974	0	10	8.04084	0.619541	15	11.8575	0.811402	6	8.86019	-1.16767	14	10.3648	0.971546
1762	0	11	6.50497	1.3553	7	7.53925	-0.203818	11	7.54884	1.04056	5	7.12623	-0.950878	0	3	6.49247	-2.01638	12	9.55182	0.706729	10	8.49792	0.474998	8	9.12285	-0.396987	0	6	8.01466	-0.822481	13	11.8338	0.323448	12	8.8357	0.913454	15	10.3425	1.20256
1763	0	3	6.48016	-2.00927	8	7.51689	0.170806	7	7.5246	-0.198279	12	7.10441	1.41323	0	2	6.46896	-3.16003	13	9.53052	0.96226	10	8.47559	0.482061	5	9.10049	-1.83379	0	6	8.02886	-0.828279	9	11.8747	-0.958241	7	8.85334	-0.700498	10	10.3806	-0.120371
1764	0	6	6.50106	-0.204558	7	7.5858	-0.221412	12	7.5942	1.27185	12	7.18201	1.39083	0	8	6.44568	0.549534	16	9.50945	1.62264	12	8.45348	1.02379	14	9.07836	1.31536	1	8	8.09398	-0.0332272	13	11.9427	0.293249	9	8.92078	0.0264056	9	10.4499	-0.483289
1765	0	5	6.55302	-0.694532	11	7.59372	1.02703	5	7.60033	-1.1629	4	7.18468	-1.59234	0	10	6.42263	1.13126	5	9.4886	-2.00736	7	8.43159	-0.541092	14	9.05646	1.32122	0	11	8.11824	0.868882	13	11.9455	0.292465	12	8.94562	0.881725	7	10.4581	-1.30705
1766	0	11	6.52763	1.34847	10	7.57067	0.768221	4	7.57548	-1.78774	8	7.16213	0.296232	0	4	6.39981	-1.1999	9	9.46797	-0.15599	13	8.40993	1.27306	10	9.03478	0.305229	0	3	8.09113	-2.93936	13	11.9208	0.299322	9	8.92017	0.0266104	12	10.4347	0.451858
1767	1	5	6.5025	-0.671937	7	7.54787	-0.207075	6	7.55088	-0.633144	9	7.13983	0.620055	1	7	6.37721	0.235392	8	9.44755	-0.511787	3	8.38848	-3.11104	9	9.01333	-0.00444349	0	8	8.06427	-0.0227232	11	11.8963	-0.270248	13	8.89498	1.13853	8	10.4116	-0.852618
1768	0	5	6.47762	-0.660811	9	7.52531	0.491562	6	7.52654	-0.623207	11	7.11778	1.17053	0	12	6.35483	1.62962	12	9.42735	0.742661	14	8.36726	1.50541	12	8.9921	0.868306	0	7	8.03767	-0.392203	9	11.8721	-0.957368	9	8.87004	0.04332	7	10.3887	-1.2808
1769	0	7	6.45299	0.206751	9	7.503	0.499	3	7.50245	-2.59949	13	7.09598	1.63748	0	7	6.33268	0.252225	6	9.40736	-1.39105	7	8.34624	-0.508831	12	8.97109	0.874371	0	13	8.01133	1.38361	5	11.8482	-3.06258	13	8.84535	1.15229	10	10.366	-0.115746
1770	0	5	6.42861	-0.638894	10	7.48093	0.796601	13	7.47861	1.53136	7	7.07441	-0.0281258	0	9	6.31074	0.896422	9	9.38757	-0.12919	8	8.32544	-0.115059	17	8.95029	1.95234	0	4	8.02537	-2.01268	12	11.8888	0.0321035	9	8.86279	0.0457369	8	10.4038	-0.849865
1771	0	4	6.44994	-1.22497	6	7.55013	-0.632836	8	7.5486	0.159594	9	7.15226	0.615913	0	6	6.28901	-0.117987	10	9.36799	0.199858	11	8.30485	0.81262	13	8.92971	1.12889	0	5	8.05019	-1.36409	10	11.8921	-0.598338	16	8.88815	1.77796	9	10.4125	-0.470828
1772	0	6	6.50232	-0.205071	11	7.55833	1.0377	4	7.55512	-1.77756	3	7.15517	-2.39899	0	6	6.30712	-0.125381	9	9.40211	-0.134035	5	8.33074	-1.48955	6	8.96207	-1.20926	0	7	8.02363	-0.386896	12	11.8679	0.0381401	11	8.86323	0.64426	16	10.3895	1.40262
1773	0	4	6.47735	-1.23867	8	7.53557	0.164202	6	7.53066	-0.624888	8	7.13287	0.306578	0	5	6.33426	-0.596699	7	9.41785	-0.913861	10	8.35273	0.520914	10	8.97807	0.323163	0	16	7.99733	2.00067	10	11.8439	-0.583092	7	8.83856	-0.694911	6	10.3668	-1.78275
1774	0	5	6.45263	-0.649637	9	7.51305	0.495651	11	7.50645	1.05335	4	7.11081	-1.55541	0	5	6.31222	-0.586841	10	9.39787	0.19041	8	8.33179	-0.117307	15	8.9571	1.56027	0	10	7.97127	0.64154	18	11.8202	1.4566	9	8.81414	0.0619535	7	10.3444	-1.26405
1775	0	10	6.42817	1.12951	12	7.49077	1.3017	7	7.48248	-0.182362	6	7.08901	-0.444584	0	2	6.29039	-3.03376	11	9.3781	0.489021	11	8.31107	0.810742	6	8.93635	-1.19876	0	14	7.94547	1.61814	10	11.7967	-0.568164	7	8.78996	-0.676542	15	10.3221	1.20782
1776	0	14	6.40395	2.03013	7	7.46873	-0.177164	7	7.45877	-0.1734	5	7.06744	-0.924586	0	5	6.26878	-0.567416	10	9.35854	0.202848	6	8.29056	-0.935118	10	8.91581	0.342851	0	9	7.91991	0.360029	10	11.7735	-0.560818	13	8.76603	1.17429	14	10.3002	0.988822
1777	0	7	6.37998	0.234347	5	7.44693	-1.0943	8	7.43531	0.19965	9	7.04611	0.651297	0	0	6.24738	-6.24738	4	9.33918	-2.66959	11	8.27026	0.823048	7	8.89549	-0.716427	0	6	7.8946	-0.773468	10	11.7505	-0.553548	10	8.74234	0.397708	9	10.2784	-0.426144
1778	0	8	6.35625	0.581155	7	7.42537	-0.160775	8	7.41208	0.207861	9	7.02502	0.658328	0	15	6.22619	2.26539	8	9.32003	-0.466701	7	8.25016	-0.472516	10	8.87537	0.355639	0	10	7.86953	0.673713	11	11.7277	-0.219417	11	8.71888	0.687782	12	10.2569	0.503179
1779	0	6	6.33276	-0.135848	9	7.40404	0.531987	7	7.3891	-0.147065	11	7.00416	1.20479	0	3	6.20521	-1.85053	11	9.30108	0.512245	5	8.23026	-1.44462	15	8.85546	1.58651	0	7	7.84471	-0.319269	11	11.7052	-0.21263	10	8.69567	0.412467	10	10.2357	-0.0745266
1780	0	3	6.30951	-1.91074	6	7.38294	-0.564582	10	7.36635	0.832833	8	6.98353	0.359377	0	7	6.18444	0.308252	8	9.28232	-0.453369	6	8.21057	-0.902461	4	8.83576	-2.41788	0	6	7.82012	-0.743059	14	11.6829	0.61926	10	8.67268	0.419735	14	10.2146	1.01168
1781	0	11	6.28649	1.42118	10	7.36206	0.834189	8	7.34384	0.231988	6	6.96313	-0.393196	0	6	6.16387	-0.0669006	11	9.26376	0.523495	5	8.19107	-1.42709	8	8.81626	-0.288593	0	16	7.79576	2.05106	13	11.6609	0.3714	9	8.64993	0.11669	6	10.1938	-1.71213
1782	0	6	6.26371	-0.107658	11	7.34141	1.10311	6	7.32156	-0.539525	8	6.94296	0.373722	0	5	6.14351	-0.511391	13	9.2454	1.04134	15	8.17178	1.76304	13	8.79697	1.16571	0	8	7.77164	0.0807382	12	11.6391	0.104186	7	8.6274	-0.615101	17	10.1733	1.65573
1783	0	5	6.24116	-0.555061	11	7.32099	1.10926	11	7.29951	1.11574	11	6.923	1.22926	0	9	6.12334	0.958887	8	9.22722	-0.433889	9	8.15267	0.282442	8	8.77787	-0.275018	1	4	7.74775	-1.87387	12	11.6175	0.110417	9	8.60511	0.131632	8	10.1529	-0.76117
1784	0	3	6.21883	-1.85839	6	7.30078	-0.531041	8	7.27769	0.255374	10	6.90327	0.979271	0	6	6.10337	-0.0422007	8	9.20924	-0.427532	12	8.13376	1.11609	9	8.75896	0.0803448	0	11	7.72408	0.987726	10	11.5961	-0.504746	12	8.58303	0.986394	6	10.1328	-1.6872
1785	1	4	6.19673	-1.09837	8	7.28079	0.254279	12	7.2561	1.36945	13	6.88376	1.69634	0	11	6.0836	1.48235	8	9.19145	-0.42124	6	8.11504	-0.863462	7	8.74026	-0.657756	0	10	7.70065	0.727119	8	11.575	-1.26396	12	8.56118	0.992702	12	10.1129	0.544766
1786	1	4	6.17486	-1.08743	13	7.26102	1.59171	8	7.23473	0.270565	7	6.86446	0.051228	0	9	6.06402	0.97866	12	9.17384	0.815843	8	8.09651	-0.0341217	12	8.72174	0.946351	0	8	7.67744	0.114044	13	11.5541	0.40102	10	8.53955	0.461836	7	10.0932	-1.16911
1787	0	4	6.1532	-1.0766	9	7.24145	0.586182	7	7.21357	-0.0807234	8	6.84538	0.40822	0	6	6.04463	-0.0182209	12	9.15641	0.820873	14	8.07817	1.58268	10	8.70342	0.410015	0	5	7.65444	-1.1871	9	11.5334	-0.844469	11	8.51813	0.748312	12	10.0737	0.556075
1788	1	7	6.13177	0.32816	10	7.2221	0.878449	11	7.19264	1.14796	11	6.82651	1.25836	0	11	6.02543	1.49989	11	9.13917	0.561062	12	8.06001	1.13738	10	8.68528	0.41575	0	15	7.63167	1.90249	16	11.5129	1.12177	6	8.49693	-1.01937	11	10.0544	0.2851
1789	0	4	6.15601	-1.07801	7	7.29399	-0.111119	9	7.26551	0.578163	9	6.90701	0.697662	0	8	6.00643	0.704834	8	9.1221	-0.396724	6	8.04203	-0.833656	9	8.66733	0.110889	0	6	7.64925	-0.673304	10	11.557	-0.49237	9	8.51782	0.160728	9	10.0955	-0.365177
1790	0	5	6.25674	-0.562029	8	7.3959	0.213582	9	7.36847	0.543844	7	7.01173	-0.00443306	0	10	5.98761	1.26883	5	9.10522	-1.83591	6	8.02424	-0.826391	7	8.64957	-0.623479	1	10	7.67758	0.734414	7	11.5637	-1.72493	6	8.5466	-1.03964	9	10.1075	-0.369181
1791	0	5	6.31089	-0.58625	8	7.40558	0.210161	7	7.3767	-0.142378	8	7.01603	0.347886	0	6	5.96897	0.0126688	10	9.08851	0.288239	11	8.00662	0.902538	6	8.63199	-1.0745	0	7	7.65449	-0.247374	22	11.5429	2.22947	7	8.52506	-0.576417	11	10.0878	0.275023
1792	0	4	6.33314	-1.16657	6	7.4753	-0.60229	6	7.44751	-0.590943	10	7.09428	0.918869	0	5	5.95051	-0.425082	11	9.07197	0.581322	12	7.98918	1.15782	15	8.61459	1.64871	0	6	7.63162	-0.666106	12	11.5222	0.137922	9	8.50373	0.165422	13	10.0684	0.813086
1793	0	9	6.38644	0.871188	4	7.48403	-1.74202	10	7.45484	0.804849	7	7.09759	-0.0368863	0	6	5.93224	0.0276633	7	9.05561	-0.776947	11	7.97192	0.913	9	8.59736	0.134212	0	6	7.60897	-0.656859	10	11.5018	-0.474909	4	8.48262	-2.24131	17	10.0491	1.68584
1794	0	10	6.36237	1.15032	15	7.46179	1.94636	9	7.43119	0.522938	10	7.07569	0.924747	1	7	5.91414	0.410415	20	9.03941	2.45086	5	7.95483	-1.32144	12	8.58032	0.987177	0	9	7.58653	0.471155	9	11.4816	-0.827193	11	8.46173	0.765318	15	10.0301	1.28323
1795	0	4	6.33856	-1.16928	5	7.43978	-1.0911	12	7.40778	1.32566	7	7.05404	-0.0204237	1	6	5.89623	0.0423658	10	9.02339	0.308831	3	7.93792	-2.85091	9	8.56345	0.145518	1	9	7.56431	0.478562	12	11.4616	0.155431	10	8.44104	0.492986	13	10.0112	0.828941
1796	1	14	6.31498	2.05391	8	7.41802	0.205761	10	7.38461	0.827058	9	7.03262	0.655792	0	2	5.87848	-2.7425	14	9.00753	1.33429	7	7.92117	-0.348169	8	8.54675	-0.193304	0	11	7.58244	1.03043	8	11.5061	-1.2396	11	8.46244	0.765103	10	10.0527	-0.0166749
1797	0	7	6.29165	0.26773	6	7.3965	-0.570117	4	7.36169	-1.68084	6	7.01145	-0.412923	0	9	5.86091	1.04636	13	8.99184	1.11166	8	7.90459	0.033732	17	8.53022	2.05422	0	3	7.61131	-2.66234	16	11.5133	1.12167	9	8.49173	0.169425	12	10.0651	0.558542
1798	0	8	6.26856	0.612157	4	7.37521	-1.6876	4	7.33901	-1.6695	6	6.99052	-0.404376	0	11	5.84352	1.55474	7	8.97631	-0.746974	6	7.88818	-0.770846	12	8.51386	1.00636	0	8	7.58876	0.145396	13	11.4929	0.417991	11	8.47068	0.762617	9	10.0459	-0.348625
1799	0	7	6.2457	0.285097	10	7.35415	0.836692	7	7.31656	-0.119648	3	6.96981	-2.29197	0	3	5.86591	-1.65463	12	9.01442	0.861861	12	7.91822	1.17831	6	8.5504	-1.0412	0	11	7.56642	1.03526	5	11.4727	-2.89469	7	8.44986	-0.547995	9	10.0268	-0.342268
1800	0	4	6.26854	-1.13427	9	7.42436	0.525214	9	7.38793	0.537355	5	7.04852	-0.916125	0	8	5.93692	0.72941	14	9.08761	1.31289	8	7.99058	0.00332909	8	8.62327	-0.220358	0	9	7.5443	0.485234	15	11.4527	0.915898	11	8.42924	0.775113	5	10.0079	-2.23962
1801	0	9	6.32242	0.892527	8	7.43356	0.200265	8	7.39583	0.213608	12	7.05228	1.42829	0	9	5.96751	1.01083	6	9.10647	-1.26821	6	8.01587	-0.822975	8	8.64255	-0.227174	0	8	7.56252	0.154672	11	11.4973	-0.149948	11	8.45071	0.768641	16	10.0495	1.48764
1802	0	6	6.29894	-0.12204	3	7.41179	-2.54715	8	7.37272	0.221776	3	7.03082	-2.3272	0	10	5.9489	1.28107	11	9.08957	0.576016	11	7.99821	0.905075	3	8.62483	-3.24749	0	10	7.59149	0.761637	16	11.5045	1.12386	9	8.48006	0.173313	13	10.0618	0.814895
1803	0	10	6.27569	1.17773	9	7.39026	0.536581	6	7.34986	-0.551078	9	7.0096	0.663465	0	7	5.93046	0.404247	5	9.07285	-1.82144	11	7.98072	0.910346	12	8.60729	0.97939	0	8	7.56903	0.15237	9	11.4842	-0.828054	8	8.45909	-0.162313	16	10.0426	1.48936
1804	0	7	6.25269	0.282457	10	7.36896	0.832008	4	7.32724	-1.66362	7	6.98863	0.00429879	0	11	5.91221	1.53403	12	9.05631	0.84977	10	7.96342	0.644023	7	8.58994	-0.600941	0	8	7.54679	0.160233	14	11.464	0.677774	11	8.43833	0.772373	7	10.0235	-1.14277
1805	0	11	6.22992	1.43823	6	7.34789	-0.550275	11	7.30485	1.11413	7	6.96788	0.0121385	0	12	5.89414	1.76261	12	9.03994	0.854495	11	7.94629	0.920728	9	8.57277	0.142411	0	5	7.52477	-1.12911	16	11.4441	1.13899	9	8.41778	0.194073	8	10.0046	-0.708734
1806	0	11	6.20739	1.44503	10	7.32706	0.845258	5	7.2827	-1.02085	4	6.94738	-1.47369	1	6	5.87625	0.0505212	4	9.02375	-2.51187	11	7.92933	0.925841	7	8.55578	-0.588028	0	11	7.50295	1.0544	11	11.4243	-0.127935	11	8.39744	0.784702	8	9.98593	-0.702134
1807	0	8	6.18508	0.641671	11	7.30645	1.11365	9	7.26078	0.579741	8	6.92709	0.379329	1	7	5.85853	0.431434	7	9.00772	-0.758846	14	7.91255	1.62694	12	8.53896	0.999117	0	14	7.48135	1.74218	6	11.4048	-2.20649	12	8.3773	1.04578	5	9.96747	-2.22152
1808	0	7	6.16301	0.316354	8	7.28607	0.252412	10	7.23909	0.873078	10	6.90704	0.978079	0	7	5.84099	0.438064	15	8.99186	1.5513	5	7.89593	-1.2951	3	8.52231	-3.18831	0	8	7.45995	0.190937	11	11.3855	-0.116218	9	8.35737	0.214211	10	9.94921	0.0160615
1809	0	9	6.14116	0.952947	7	7.26591	-0.100505	12	7.21762	1.38055	8	6.88722	0.393429	0	5	5.82362	-0.368335	9	8.97617	0.00794379	12	7.87949	1.18949	12	8.50584	1.00868	0	10	7.43876	0.809936	10	11.3663	-0.432071	14	8.33764	1.51333	15	9.93115	1.30877
1810	0	14	6.11953	2.10614	8	7.24597	0.266589	4	7.19638	-1.59819	7	6.86761	0.0500384	0	4	5.80643	-0.903213	10	8.96064	0.328674	7	7.86321	-0.326263	5	8.48954	-1.56057	1	5	7.41777	-1.08126	7	11.3474	-1.64316	5	8.3181	-1.4839	13	9.91328	0.856101
1811	1	4	6.09813	-1.04907	11	7.22625	1.13783	5	7.17536	-0.972853	6	6.84823	-0.346286	1	11	5.82902	1.55911	12	8.99876	0.866383	13	7.89338	1.41632	10	8.52614	0.466074	0	10	7.39698	0.823146	17	11.3287	1.3755	5	8.29876	-1.47525	7	9.89561	-1.09444
1812	0	4	6.07695	-1.03847	7	7.20674	-0.0781423	11	7.15457	1.15944	8	6.82906	0.413991	0	6	5.90023	0.0407323	8	9.07196	-0.378995	8	7.96588	0.0120646	7	8.59907	-0.60439	0	11	7.3764	1.09256	11	11.3102	-0.0935149	14	8.27962	1.52883	10	9.87814	0.0385366
1813	0	6	6.05598	-0.0228542	10	7.18745	0.889406	12	7.13399	1.4047	9	6.8101	0.729966	0	10	5.93103	1.28672	7	9.09082	-0.790257	10	7.99129	0.635209	9	8.61841	0.127198	0	10	7.35601	0.836104	12	11.2918	0.204434	19	8.26067	2.46377	12	9.86085	0.617519
1814	0	5	6.03523	-0.462969	9	7.16837	0.610543	8	7.11362	0.313383	6	6.79136	-0.323072	1	6	5.91261	0.0356782	18	9.07394	2.10389	5	7.97376	-1.32991	15	8.60075	1.65228	0	7	7.33581	-0.126925	17	11.2737	1.38884	12	8.24192	1.08486	7	9.84375	-1.07484
1815	0	9	6.06015	0.979951	13	7.24053	1.59739	4	7.18705	-1.59353	10	6.872	0.98916	1	5	5.89437	-0.399975	5	9.05723	-1.81445	6	7.95641	-0.798701	8	8.58328	-0.206222	1	4	7.31581	-1.65791	12	11.2557	0.214852	8	8.22335	-0.0789657	9	9.82684	-0.275614
1816	0	9	6.11609	0.961303	9	7.25167	0.582776	8	7.19698	0.283909	11	6.87768	1.24293	0	5	5.91594	-0.40962	13	9.09418	1.08328	5	7.98552	-1.33517	7	8.61873	-0.611822	0	3	7.33614	-2.50347	7	11.3023	-1.62612	8	8.24684	-0.087272	13	9.87028	0.868029
1817	0	4	6.09465	-1.04732	12	7.23181	1.37646	7	7.1759	-0.0664827	11	6.85811	1.24883	0	9	5.94651	1.01783	12	9.11274	0.83348	4	8.01069	-2.00534	16	8.63778	1.84056	0	9	7.36719	0.544271	13	11.3115	0.4683	16	8.2782	1.93045	11	9.8846	0.336307
1818	0	6	6.07342	-0.0299752	6	7.21217	-0.494865	5	7.15503	-0.963758	10	6.83877	0.999669	0	3	5.92786	-1.6904	10	9.09555	0.286012	14	7.9929	1.60546	8	8.61984	-0.219145	0	13	7.34679	1.56792	14	11.2931	0.723447	11	8.25922	0.826376	18	9.86719	1.91692
1819	0	8	6.05242	0.688574	7	7.19274	-0.0728481	9	7.13438	0.621873	6	6.81964	-0.334618	0	6	5.94902	0.0208108	8	9.13203	-0.400233	5	8.02159	-1.35129	11	8.65481	0.7071	0	6	7.32659	-0.541579	18	11.2749	1.58512	7	8.24043	-0.468838	12	9.84997	0.620659
1820	0	8	6.03163	0.695924	10	7.17352	0.893811	8	7.11395	0.313267	12	6.80073	1.5009	0	5	6.01881	-0.455627	9	9.2036	-0.0678682	6	8.09262	-0.854307	15	8.72614	1.6199	0	5	7.30659	-1.03154	9	11.2569	-0.752289	12	8.22183	1.09066	11	9.83295	0.35188
1821	0	13	6.01105	1.93839	6	7.15452	-0.47133	6	7.09373	-0.446513	7	6.78203	0.0823838	0	9	6.04821	0.983929	9	9.22087	-0.0736224	8	8.11658	-0.0412186	9	8.7439	0.0853678	0	6	7.32691	-0.541707	19	11.3034	1.76573	12	8.24529	1.08389	11	9.87627	0.338819
1822	0	4	5.99069	-0.995345	5	7.13572	-0.955123	6	7.07372	-0.438346	11	6.76354	1.27734	0	10	6.02841	1.25593	11	9.2024	0.541997	12	8.09762	1.12652	12	8.72468	0.945504	1	3	7.35795	-2.51607	14	11.3125	0.718263	12	8.27662	1.07485	9	9.89047	-0.296824
1823	0	9	5.97053	1.00982	8	7.11713	0.312142	11	7.05393	1.18979	7	6.74526	0.0962822	0	6	6.00881	-0.00359669	6	9.18413	-1.29991	7	8.07885	-0.407767	13	8.70567	1.19103	1	9	7.33756	0.554148	11	11.294	-0.0886514	13	8.2576	1.3153	11	9.87295	0.339818
1824	0	15	5.95059	2.33655	9	7.09874	0.633753	9	7.03434	0.655221	3	6.72718	-2.15189	1	6	5.98941	0.00432513	8	9.16605	-0.412262	10	8.06027	0.613395	10	8.68686	0.415253	0	6	7.31735	-0.537807	6	11.2757	-2.15381	11	8.23878	0.832539	9	9.85563	-0.285209
1825	0	3	5.93084	-1.69212	15	7.08055	2.04479	10	7.01495	0.943955	7	6.70931	0.109871	0	12	5.9702	1.74065	2	9.14817	-5.05452	12	8.04189	1.14261	11	8.66825	0.70305	0	6	7.29735	-0.52964	14	11.2576	0.732927	12	8.22015	1.09115	14	9.83849	1.11221
1826	0	11	5.9113	1.5343	12	7.06256	1.42532	5	6.99577	-0.892535	12	6.69163	1.53239	1	10	5.95118	1.28035	12	9.13049	0.828357	9	8.0237	0.325435	9	8.64983	0.116722	0	6	7.27753	-0.521551	22	11.2397	2.2941	10	8.2017	0.568671	14	9.82154	1.11674
1827	0	12	5.89196	1.76324	8	7.04477	0.337724	11	6.97679	1.21304	8	6.67416	0.468756	0	3	5.93236	-1.693	9	9.11299	-0.0376628	7	8.00569	-0.380115	9	8.63162	0.122793	0	9	7.25791	0.580696	10	11.222	-0.386437	5	8.18345	-1.42368	7	9.80478	-1.06011
1828	1	10	5.87282	1.30513	8	7.02717	0.343946	12	6.958	1.4555	13	6.65688	1.75927	0	4	5.91372	-0.956862	7	9.09568	-0.792092	6	7.98787	-0.811544	8	8.6136	-0.216939	0	11	7.27861	1.12204	19	11.2688	1.77365	12	8.20725	1.09487	19	9.84836	2.09953
1829	0	6	5.85387	0.0596568	11	7.00977	1.2031	10	6.93942	0.967842	10	6.63979	1.06259	0	5	5.9349	-0.4181	5	9.13204	-1.8479	8	8.01652	-0.00583886	10	8.6485	0.427382	0	3	7.35017	-2.51157	10	11.3426	-0.424575	11	8.2808	0.819871	11	9.92299	0.32473
1830	1	6	5.83512	0.0673123	8	6.99255	0.356187	10	6.92102	0.973658	11	6.62289	1.31975	0	12	5.96508	1.74213	11	9.15001	0.557792	7	8.04122	-0.393545	11	8.66701	0.703422	0	13	7.38081	1.55848	10	11.3512	-0.427294	12	8.31167	1.06473	14	9.93659	1.08599
1831	0	9	5.81656	1.06115	14	6.97552	1.87737	10	6.90282	0.979413	7	6.60618	0.148848	0	11	5.98568	1.51188	7	9.18573	-0.826129	8	8.06927	-0.0244924	10	8.70128	0.410693	0	5	7.36002	-1.05543	9	11.3322	-0.777404	7	8.29221	-0.488411	11	9.91848	0.32609
1832	0	10	5.84365	1.31435	13	7.04972	1.65031	6	6.9784	-0.39943	8	6.68884	0.463566	0	8	6.01529	0.701703	10	9.20307	0.252011	13	8.09339	1.36085	7	8.71916	-0.64978	0	12	7.33942	1.34539	8	11.3134	-1.17147	7	8.27295	-0.481131	14	9.90057	1.09562
1833	0	10	5.90174	1.29598	4	7.06287	-1.53143	3	6.99045	-2.30389	8	6.6965	0.460857	1	8	5.99569	0.708631	10	9.18468	0.257827	9	8.07458	0.308473	8	8.70006	-0.24751	0	9	7.31903	0.560324	18	11.2948	1.58043	7	8.25389	-0.473925	12	9.88285	0.611168
1834	0	4	5.92788	-0.963939	9	7.13603	0.621324	6	7.06505	-0.434804	6	6.77808	-0.317649	1	3	5.97629	-1.71836	6	9.16649	-1.29271	13	8.05596	1.37123	9	8.68117	0.106275	0	6	7.29883	-0.530246	18	11.2764	1.58477	10	8.23501	0.558138	14	9.86533	1.10504
1835	0	8	5.98503	0.7124	7	7.14816	-0.055999	11	7.07613	1.18309	10	6.78468	1.01677	0	7	5.95709	0.394181	8	9.14849	-0.406054	9	8.03754	0.320821	9	8.66249	0.112504	1	10	7.27883	0.860508	16	11.2582	1.18546	12	8.21633	1.09225	7	9.84801	-1.07645
1836	0	5	5.96478	-0.431465	6	7.12928	-0.461027	8	7.05618	0.33369	3	6.76603	-2.17432	0	4	5.93809	-0.969045	10	9.13069	0.2749	11	8.0193	0.898714	16	8.644	1.839	0	13	7.25903	1.59226	16	11.2401	1.18996	7	8.19784	-0.452742	13	9.83087	0.878958
1837	0	8	5.94475	0.726641	6	7.11061	-0.453404	10	7.03644	0.937159	6	6.7476	-0.305205	0	6	5.91928	0.0329548	7	9.11308	-0.79867	12	8.00126	1.15434	11	8.62571	0.715874	0	10	7.23942	0.872973	10	11.2223	-0.386533	5	8.17954	-1.42193	12	9.81393	0.631065
1838	0	10	5.92492	1.28865	7	7.09214	-0.0348261	8	7.01692	0.347573	8	6.72937	0.449236	0	6	5.94028	0.0243814	4	9.14915	-2.57457	3	8.02968	-2.90389	15	8.66035	1.63689	0	8	7.21999	0.275773	13	11.2047	0.497931	8	8.16142	-0.0570722	12	9.79717	0.635903
1839	0	4	5.90529	-0.952647	9	7.07388	0.64204	9	6.99759	0.66747	11	6.71135	1.29308	0	5	6.00991	-0.451645	14	9.22032	1.27742	10	8.10046	0.600688	10	8.73134	0.401185	0	7	7.20076	-0.0758808	14	11.1872	0.751744	4	8.14349	-2.07175	12	9.78059	0.640688
1840	0	5	5.88587	-0.396175	10	7.05582	0.931033	9	6.97847	0.673844	9	6.69353	0.768824	0	9	6.03916	0.986948	10	9.23718	0.241225	12	8.12417	1.11885	4	8.74877	-2.37439	0	10	7.18171	0.89122	12	11.17	0.239611	8	8.12574	-0.0444565	9	9.7642	-0.254733
1841	0	5	5.86665	-0.387579	6	7.03795	-0.423743	12	6.95955	1.45505	9	6.67591	0.774696	0	12	6.0192	1.72651	9	9.21832	-0.0727723	11	8.10496	0.872887	6	8.72924	-1.11421	0	6	7.20298	-0.491117	10	11.2172	-0.384921	9	8.15005	0.283318	8	9.80815	-0.639277
1842	0	5	5.84763	-0.379072	5	7.02029	-0.9035	10	6.94083	0.967395	4	6.65849	-1.32925	0	11	5.99946	1.50772	11	9.19966	0.542823	7	8.08595	-0.410451	10	8.70991	0.407963	0	6	7.23498	-0.504177	13	11.2271	0.491713	11	8.18221	0.849595	16	9.82298	1.54426
1843	0	10	5.8288	1.31905	10	7.00282	0.947793	6	6.9223	-0.37653	5	6.64127	-0.733998	0	7	5.97991	0.385558	13	9.18121	1.05914	8	8.06714	-0.0237368	6	8.69079	-1.09851	0	10	7.21551	0.880533	11	11.2094	-0.0631242	7	8.16403	-0.439961	15	9.80608	1.34106
1844	0	6	5.81017	0.0774973	9	6.98554	0.671488	3	6.90398	-2.25396	3	6.62424	-2.09246	0	4	5.96056	-0.98028	15	9.16295	1.50712	4	8.04852	-2.02426	8	8.67188	-0.237544	0	5	7.19624	-0.982187	13	11.1918	0.501504	11	8.14603	0.860506	12	9.78936	0.638156
1845	0	6	5.79173	0.0850253	12	6.96845	1.45249	7	6.88584	0.0431486	6	6.6074	-0.247971	0	4	5.94141	-0.970705	20	9.14489	2.42727	11	8.0301	0.895459	9	8.65317	0.11561	0	8	7.17715	0.290921	11	11.1744	-0.0525937	6	8.12821	-0.868837	14	9.77283	1.12976
1846	0	6	5.77348	0.0924758	9	6.95154	0.682819	7	6.86789	0.0499315	4	6.59075	-1.29538	0	4	5.92246	-0.961227	13	9.12703	1.07417	9	8.01187	0.329379	8	8.63466	-0.224387	0	10	7.15825	0.89864	14	11.1572	0.759757	7	8.11057	-0.419757	13	9.75649	0.899588
1847	0	5	5.75542	-0.337834	3	6.93483	-2.27177	3	6.85014	-2.22288	8	6.57429	0.504063	0	2	5.90369	-2.76033	11	9.10937	0.570046	8	7.99382	0.00218439	9	8.61635	0.127882	0	7	7.13953	-0.0527389	12	11.1402	0.248189	7	8.09312	-0.413159	10	9.74032	0.0821177
1848	0	3	5.73754	-1.58052	6	6.91829	-0.374892	10	6.83256	1.00163	9	6.55802	0.813994	0	6	5.88512	0.0468988	8	9.0919	-0.386043	10	7.97597	0.640055	8	8.59824	-0.211511	0	7	7.121	-0.0457335	9	11.1234	-0.707809	9	8.07584	0.308055	9	9.72433	-0.241445
1849	1	5	5.71985	-0.321928	6	6.90194	-0.368216	11	6.81518	1.26177	5	6.54192	-0.68957	0	8	5.86674	0.754221	12	9.07461	0.844487	18	7.9583	2.36685	12	8.58033	0.987175	0	5	7.10264	-0.940331	7	11.1068	-1.55222	10	8.05873	0.613882	5	9.70852	-2.10572
1850	0	9	5.70234	1.09922	7	6.88577	0.0431749	10	6.79797	1.01257	6	6.52601	-0.214744	0	10	5.84854	1.31281	12	9.05752	0.849422	6	7.94081	-0.792333	6	8.5626	-1.04618	0	10	7.08447	0.921972	17	11.0903	1.43331	9	8.0418	0.319399	16	9.69289	1.57678
1851	0	6	5.68501	0.128592	10	6.86977	0.989864	8	6.78095	0.430999	5	6.51028	-0.675418	0	9	5.83054	1.05649	10	9.0406	0.303388	11	7.92351	0.927597	7	8.54507	-0.583982	0	7	7.06647	-0.0251225	15	11.074	1.01368	6	8.02505	-0.826721	6	9.67742	-1.5013
1852	1	6	5.66786	0.135594	5	6.85396	-0.829114	7	6.7641	0.0891598	4	6.49472	-1.24736	0	9	5.81271	1.06243	9	9.02388	-0.00795841	11	7.90638	0.932761	4	8.52773	-2.26386	0	14	7.04864	1.85783	9	11.0579	-0.68597	9	8.00846	0.330514	9	9.66213	-0.220709
1853	0	9	5.69635	1.10122	11	6.92935	1.22735	7	6.84102	0.0600871	7	6.57852	0.159306	0	9	5.79506	1.06831	14	9.00733	1.33435	11	7.88944	0.93787	13	8.51057	1.24514	0	10	7.03099	0.938883	12	11.042	0.276562	11	7.99204	0.906934	6	9.647	-1.48888
1854	0	4	5.75582	-0.87791	10	6.94368	0.966494	11	6.8544	1.24994	11	6.5873	1.33048	0	4	5.7776	-0.888799	6	8.99096	-1.22106	12	7.87266	1.19146	12	8.49359	1.01221	0	3	7.01351	-2.3172	10	11.0262	-0.324508	4	7.97579	-1.98789	15	9.63204	1.386
1855	0	8	5.73787	0.799783	6	6.92698	-0.378437	7	6.83673	0.0617104	10	6.57082	1.0844	0	5	5.76031	-0.34002	8	8.97477	-0.344633	11	7.85607	0.947931	9	8.47681	0.174398	0	3	6.9962	-2.30721	11	11.0106	-0.00318857	14	7.9597	1.61434	15	9.61725	1.38982
1856	0	7	5.76557	0.466572	9	7.0015	0.666168	12	6.91283	1.46854	8	6.6537	0.475988	0	4	5.7432	-0.871598	8	8.95876	-0.338971	9	7.83964	0.386786	7	8.46019	-0.551901	0	6	6.97905	-0.399697	11	10.9951	0.0014682	7	7.94378	-0.356715	10	9.60261	0.125665
1857	0	8	5.82426	0.769241	9	7.01497	0.661677	6	6.9254	-0.377792	6	6.66159	-0.270093	0	6	5.72626	0.111755	15	8.94291	1.56393	6	7.82339	-0.744395	9	8.44376	0.185413	0	12	6.96208	1.45432	14	10.9799	0.807169	7	7.92802	-0.350757	9	9.58814	-0.196047
1858	0	7	5.80554	0.451464	13	6.99742	1.66482	7	6.90692	0.03518	5	6.64422	-0.735316	0	6	5.70949	0.1186	6	8.92724	-1.19504	6	7.8073	-0.737829	6	8.4275	-0.991024	0	11	6.94526	1.22255	19	10.9647	1.84342	12	7.91242	1.17998	12	9.57383	0.700375
1859	0	8	5.78701	0.78241	10	6.98006	0.954989	12	6.88864	1.47552	6	6.62704	-0.255989	0	2	5.69289	-2.61127	11	8.91174	0.629633	15	7.79139	1.86126	11	8.41142	0.780486	0	7	6.92861	0.0269819	9	10.9498	-0.649924	9	7.89697	0.367676	14	9.55967	1.18673
1860	0	7	5.76868	0.465396	2	6.96289	-3.5093	8	6.87056	0.399319	9	6.61006	0.796647	0	7	5.67647	0.500249	10	8.89641	0.348986	11	7.77563	0.972184	3	8.39551	-3.1151	0	8	6.91212	0.384622	13	10.935	0.572736	5	7.88169	-1.28873	5	9.54567	-2.03289
1861	0	8	5.75053	0.795307	3	6.94592	-2.27818	4	6.85266	-1.42633	9	6.59327	0.802243	0	7	5.6602	0.506396	13	8.88124	1.14234	7	7.76004	-0.287268	7	8.37977	-0.521505	0	7	6.89579	0.0393862	11	10.9203	0.0240223	6	7.86655	-0.762018	10	9.53183	0.148049
1862	0	7	5.73258	0.47904	6	6.92913	-0.379317	3	6.83495	-2.21411	8	6.57667	0.503222	0	3	5.64411	-1.52658	7	8.86624	-0.705372	7	7.74461	-0.281436	8	8.3642	-0.128764	0	7	6.87962	0.0454986	15	10.9058	1.05711	10	7.85158	0.679391	10	9.51813	0.152379
1863	0	6	5.71481	0.116429	8	6.91253	0.384478	5	6.81743	-0.812781	5	6.56026	-0.69777	0	8	5.62817	0.838568	7	8.8514	-0.699762	6	7.72934	-0.706001	8	8.3488	-0.123318	0	8	6.86361	0.401776	14	10.8915	0.830781	6	7.83675	-0.74985	4	9.50459	-2.7523
1864	0	11	5.69722	1.59885	9	6.89611	0.701296	7	6.8001	0.0755557	11	6.54404	1.34352	0	9	5.6124	1.1292	10	8.83671	0.367863	11	7.71423	0.990697	6	8.33356	-0.95267	0	15	6.84774	2.1049	15	10.8773	1.06447	8	7.82207	0.0629062	13	9.4912	0.973167
1865	0	7	5.67982	0.498981	5	6.87988	-0.840706	9	6.78295	0.739018	7	6.52799	0.178401	1	2	5.59679	-2.54331	13	8.82219	1.15872	10	7.69928	0.727553	12	8.31848	1.06276	0	7	6.83204	0.0634837	15	10.8633	1.0681	4	7.80755	-1.90377	14	9.47795	1.20857
1866	0	11	5.6626	1.60929	7	6.86382	0.0514715	12	6.76598	1.51093	6	6.51213	-0.209078	0	10	5.58134	1.39731	9	8.80782	0.0640583	6	7.68447	-0.687684	7	8.30356	-0.4927	0	8	6.81648	0.418437	10	10.8494	-0.268604	5	7.79317	-1.24914	10	9.46485	0.169231
1867	0	7	5.64555	0.511932	5	6.84794	-0.826423	10	6.74918	1.028	7	6.49645	0.190323	0	6	5.56604	0.177165	12	8.79361	0.925604	14	7.66983	1.69181	11	8.28881	0.817456	0	9	6.80108	0.732975	12	10.8357	0.336116	10	7.77893	0.702363	12	9.45189	0.735577
1868	0	4	5.62869	-0.814344	7	6.83223	0.0634095	11	6.73257	1.28668	7	6.48095	0.196183	1	3	5.55089	-1.47276	12	8.77956	0.929662	10	7.65533	0.741449	9	8.27421	0.241931	0	9	6.78582	0.738061	10	10.8221	-0.25996	13	7.76484	1.45197	13	9.43907	0.987625
1869	0	6	5.612	0.158402	2	6.8167	-3.40592	3	6.71613	-2.14551	6	6.46562	-0.190089	0	7	5.5359	0.553376	9	8.76565	0.0781174	6	7.64098	-0.669929	9	8.25977	0.246745	0	11	6.77071	1.27518	12	10.8086	0.343923	9	7.7509	0.416368	6	9.42639	-1.39882
1870	0	9	5.59548	1.13484	7	6.80134	0.0750851	10	6.69986	1.04359	6	6.45047	-0.183901	0	6	5.56069	0.179348	12	8.80538	0.922208	7	7.67307	-0.254398	10	8.29821	0.538153	0	6	6.75574	-0.308531	11	10.7953	0.0617166	10	7.73709	0.715595	9	9.41385	-0.137952
1871	0	5	5.57913	-0.258994	9	6.78615	0.737949	6	6.68377	-0.279148	11	6.43548	1.37626	0	1	5.59444	-4.59444	13	8.82668	1.15747	7	7.70118	-0.265023	11	8.32023	0.807982	0	9	6.74092	0.753025	7	10.7821	-1.42952	6	7.72343	-0.703586	15	9.40145	1.44554
1872	0	7	5.56295	0.543154	6	6.77113	-0.314812	7	6.66785	0.125543	10	6.42066	1.13189	0	8	5.57895	0.855969	8	8.81221	-0.28716	9	7.68632	0.437892	4	8.30523	-2.15261	0	8	6.72625	0.45034	12	10.7691	0.355327	5	7.7099	-1.2119	7	9.38919	-0.903028
1873	1	4	5.54694	-0.773468	9	6.75627	0.747909	9	6.65209	0.782637	10	6.40602	1.13652	0	7	5.60325	0.527924	8	8.85138	-0.30101	9	7.7179	0.427367	8	8.34312	-0.121311	0	8	6.71171	0.455479	7	10.7562	-1.41972	10	7.69651	0.728428	9	9.37706	-0.125686
1874	0	4	5.53109	-0.765545	9	6.74158	0.752807	9	6.6365	0.787834	8	6.39153	0.56868	0	3	5.63651	-1.52219	5	8.87214	-1.73167	12	7.74551	1.22817	9	8.36459	0.211802	0	5	6.69731	-0.759062	14	10.7435	0.870345	7	7.68325	-0.258245	10	9.36506	0.200786
1875	1	5	5.51541	-0.230497	4	6.72705	-1.36352	3	6.62107	-2.09063	7	6.37721	0.235392	0	8	5.62054	0.841267	7	8.85713	-0.701929	8	7.73015	0.0954068	11	8.34905	0.79929	1	12	6.68306	1.53487	10	10.7309	-0.231114	10	7.67013	0.736769	7	9.35319	-0.889423
1876	0	4	5.49989	-0.749943	8	6.71267	0.455138	9	6.60581	0.798065	11	6.36305	1.39809	0	4	5.60473	-0.802365	12	8.84228	0.911555	9	7.71495	0.42835	11	8.33368	0.803925	0	8	6.66894	0.470602	9	10.7184	-0.572786	11	7.65714	1.00791	6	9.34145	-1.36414
1877	0	8	5.52998	0.873283	8	6.7895	0.427978	10	6.68429	1.04852	6	6.44822	-0.182987	0	14	5.58908	2.24791	12	8.82759	0.915795	5	7.69991	-1.20744	10	8.31848	0.531744	0	11	6.65495	1.31008	9	10.706	-0.568667	10	7.64429	0.744942	10	9.32984	0.211922
1878	0	7	5.59105	0.532531	7	6.80525	0.0736094	10	6.69922	1.0438	5	6.45838	-0.652208	0	6	5.57359	0.17408	6	8.81307	-1.14843	7	7.68502	-0.258914	11	8.30343	0.813045	0	11	6.6411	1.31426	12	10.6938	0.377075	11	7.63156	1.01562	16	9.31836	1.67041
1879	0	5	5.62015	-0.277338	7	6.88098	0.0449835	5	6.77666	-0.794548	6	6.54243	-0.221445	0	7	5.55826	0.544925	8	8.7987	-0.282382	7	7.67029	-0.253346	10	8.28855	0.541207	0	9	6.62738	0.790872	11	10.6817	0.0959778	8	7.61896	0.134717	10	9.30701	0.219144
1880	0	5	5.68022	-0.304204	6	6.89566	-0.365653	4	6.79056	-1.39528	7	6.55147	0.169529	0	8	5.54309	0.868649	12	8.78448	0.928239	6	7.65571	-0.675942	14	8.27383	1.53038	0	15	6.6138	2.16531	12	10.6697	0.384022	11	7.60649	1.02318	8	9.29577	-0.458124
1881	0	1	5.66287	-4.66287	11	6.8793	1.24244	2	6.77341	-3.37531	3	6.53524	-2.04107	0	3	5.52807	-1.45958	11	8.77042	0.672242	10	7.64129	0.74589	6	8.25927	-0.922344	0	7	6.64048	0.135888	9	10.7222	-0.57407	7	7.63602	-0.240393	12	9.34482	0.766484
1882	1	9	5.6457	1.1181	8	6.86313	0.401945	4	6.75643	-1.37822	10	6.51919	1.10073	0	6	5.5132	0.198735	11	8.75652	0.676435	10	7.62701	0.750405	6	8.24487	-0.916463	0	4	6.67782	-1.33891	11	10.7373	0.079216	9	7.67336	0.442214	9	9.36469	-0.121565
1883	0	2	5.62871	-2.56589	12	6.84713	1.48751	8	6.73964	0.445604	4	6.50333	-1.25166	1	6	5.49849	0.204742	11	8.74276	0.680583	4	7.61289	-1.80644	10	8.23062	0.559528	0	8	6.66366	0.472469	16	10.7247	1.31884	7	7.66029	-0.249566	15	9.35278	1.45811
1884	1	6	5.61189	0.158443	6	6.83131	-0.339382	7	6.72303	0.104686	11	6.48764	1.36053	0	12	5.48392	1.88103	10	8.72916	0.401877	9	7.59891	0.467032	16	8.21652	1.94587	0	7	6.64963	0.132428	10	10.7122	-0.225208	9	7.64736	0.450881	14	9.341	1.24517
1885	0	6	5.59526	0.165236	14	6.81567	1.92009	8	6.70659	0.45729	12	6.47214	1.59576	0	8	5.4695	0.894666	8	8.71569	-0.253036	9	7.58507	0.471644	9	8.20257	0.265808	0	10	6.63574	1.06387	10	10.6998	-0.221302	5	7.63455	-1.17821	11	9.32934	0.503722
1886	0	4	5.62425	-0.812124	9	6.89124	0.702921	10	6.78391	1.01702	13	6.55598	1.78725	0	8	5.45523	0.899711	14	8.70238	1.41585	8	7.57138	0.151541	9	8.18878	0.270407	0	14	6.62198	1.97186	14	10.6876	0.885277	14	7.62188	1.70463	9	9.31782	-0.10594
1887	1	6	5.68423	0.128914	11	6.90575	1.23446	6	6.79769	-0.325657	14	6.56483	1.98713	0	7	5.44111	0.589206	6	8.68921	-1.09787	11	7.55783	1.03785	13	8.17513	1.33818	0	3	6.60836	-2.08329	6	10.6755	-1.90877	7	7.60933	-0.230306	9	9.30642	-0.10214
1888	0	6	5.71224	0.117478	6	6.98026	-0.400191	5	6.87401	-0.838081	9	6.64758	0.784141	0	12	5.46675	1.88599	10	8.72967	0.401714	6	7.5907	-0.649401	3	8.21436	-3.01051	0	12	6.59486	1.56033	12	10.6635	0.385802	12	7.59692	1.27106	16	9.29515	1.67621
1889	0	14	5.77125	2.19923	7	6.99373	0.00236909	5	6.88679	-0.843797	9	6.65534	0.781553	0	8	5.50135	0.883406	11	8.7517	0.677889	6	7.6196	-0.661197	11	8.23716	0.833027	0	8	6.5815	0.501515	10	10.6517	-0.206087	5	7.58462	-1.15588	7	9.284	-0.863269
1890	0	5	5.75284	-0.336681	11	6.97618	1.21323	3	6.86852	-2.23349	8	6.63785	0.481594	0	1	5.4867	-4.4867	12	8.73794	0.941675	10	7.60551	0.757205	4	8.22293	-2.11147	0	12	6.56827	1.56801	11	10.64	0.108547	10	7.57246	0.767657	6	9.27297	-1.33618
1891	0	10	5.78009	1.33445	4	7.04986	-1.52493	4	6.94405	-1.47202	13	6.71973	1.74184	0	4	5.4722	-0.736101	13	8.72434	1.18586	12	7.59157	1.27261	10	8.20886	0.566409	0	6	6.55516	-0.226644	15	10.6284	1.12874	7	7.56041	-0.211816	15	9.26206	1.48153
1892	0	8	5.83834	0.764263	12	7.06251	1.42533	3	6.95604	-2.28402	4	6.72663	-1.36331	0	5	5.45785	-0.204757	11	8.71088	0.690195	6	7.57777	-0.644121	9	8.19493	0.268355	0	5	6.54218	-0.689685	7	10.6169	-1.36707	10	7.54849	0.775235	14	9.25127	1.26915
1893	1	6	5.81919	0.0738175	8	7.04414	0.337947	4	6.93701	-1.4685	7	6.70829	0.110258	0	4	5.44365	-0.721822	17	8.69757	2.01363	7	7.56412	-0.213216	5	8.18116	-1.42266	0	9	6.52933	0.823558	17	10.6056	1.55087	10	7.53669	0.778968	12	9.2406	0.79657
1894	0	7	5.80023	0.45347	12	7.02598	1.43588	6	6.91817	-0.374842	9	6.69015	0.769949	1	13	5.42959	2.09966	12	8.68441	0.957129	7	7.5506	-0.208109	12	8.16754	1.10634	0	13	6.5166	1.79817	9	10.5944	-0.531455	9	7.52501	0.491664	5	9.23005	-1.89173
1895	0	3	5.78148	-1.60589	10	7.00803	0.946144	8	6.89954	0.389071	7	6.67223	0.123885	1	4	5.41567	-0.707834	12	8.67139	0.960888	10	7.53723	0.778795	8	8.15406	-0.0544676	0	11	6.50399	1.3556	14	10.5833	0.913163	10	7.51344	0.786318	16	9.21961	1.6951
1896	0	4	5.76292	-0.881462	8	6.99028	0.356991	7	6.88111	0.0449369	5	6.65451	-0.73992	0	5	5.40189	-0.179732	9	8.6585	0.113832	2	7.524	-3.90606	10	8.14072	0.587955	0	14	6.4915	2.00673	13	10.5723	0.673332	13	7.502	1.52487	10	9.20928	0.250046
1897	0	9	5.79002	1.06999	7	7.06376	-0.0240989	9	6.95646	0.68118	10	6.73617	1.03211	0	6	5.38826	0.249742	12	8.64576	0.968285	6	7.51091	-0.616826	11	8.12753	0.866081	0	8	6.47913	0.537708	12	10.5614	0.41529	4	7.49066	-1.74533	7	9.19907	-0.831171
1898	1	7	5.84813	0.435367	11	7.07621	1.18307	7	6.9683	0.0119833	10	6.74286	1.03	1	10	5.37476	1.46263	8	8.63316	-0.223856	8	7.49795	0.177501	6	8.11449	-0.863236	0	10	6.46688	1.11727	21	10.5506	2.28024	7	7.47945	-0.181215	7	9.18897	-0.827354
1899	1	4	5.82883	-0.914415	8	7.05765	0.333169	14	6.94909	1.88443	9	6.7243	0.758566	0	7	5.40103	0.604355	7	8.67418	-0.63278	5	7.53141	-1.13208	13	8.15431	1.34395	0	6	6.45475	-0.185652	14	10.54	0.924727	6	7.46835	-0.59945	12	9.17898	0.814357
1900	1	8	5.80973	0.774375	7	7.03931	-0.0148569	9	6.9301	0.689967	15	6.70596	2.14151	1	7	5.47587	0.576067	11	8.75025	0.678326	12	7.60717	1.2681	7	8.23043	-0.465059	0	13	6.44274	1.81866	12	10.5295	0.42451	11	7.45736	1.06815	10	9.1691	0.262753
1901	0	5	5.79084	-0.353675	3	7.02117	-2.32162	3	6.91131	-2.2582	8	6.68783	0.463923	1	10	5.51028	1.41978	14	8.77196	1.39725	6	7.63582	-0.66782	9	8.25294	0.24902	0	4	6.43084	-1.21542	13	10.519	0.688097	11	7.44648	1.07143	4	9.15933	-2.57966
1902	1	8	5.81761	0.771593	7	7.09427	-0.0356294	4	6.98631	-1.49316	12	6.76908	1.51004	0	7	5.49543	0.568674	13	8.75789	1.17655	7	7.62149	-0.234901	18	8.23842	2.30083	0	6	6.41906	-0.171078	10	10.5087	-0.16087	13	7.43571	1.54326	13	9.14966	1.06789
1903	0	3	5.92084	-1.68635	6	7.19738	-0.488827	7	7.09138	-0.034539	7	6.87453	0.0474218	0	10	5.52036	1.41659	6	8.79746	-1.14206	10	7.6536	0.741998	5	8.2768	-1.46543	0	8	6.40738	0.563075	13	10.4985	0.693788	6	7.42505	-0.581773	7	9.1401	-0.808883
1904	0	9	6.02295	0.992351	8	7.29929	0.247739	7	7.1953	-0.0738154	3	6.97875	-2.29713	0	10	5.55426	1.40586	10	8.81861	0.373587	10	7.68173	0.733102	7	8.29875	-0.490883	0	3	6.39582	-1.96058	13	10.4884	0.696589	10	7.41449	0.817608	9	9.13065	-0.0435486
1905	0	5	6.07848	-0.482312	9	7.30898	0.563672	8	7.20448	0.281258	8	6.98257	0.359715	0	9	5.57854	1.14048	8	8.85748	-0.303165	12	7.71317	1.2375	6	8.33642	-0.953841	0	7	6.38437	0.232685	8	10.4784	-0.876255	7	7.40405	-0.152716	9	9.12129	-0.0404307
1906	0	9	6.1021	0.965967	10	7.37874	0.828916	6	7.27625	-0.521027	10	7.06036	0.929596	0	6	5.65142	0.142305	9	8.93142	0.0228589	10	7.78694	0.699832	10	8.41041	0.502672	0	7	6.37303	0.236971	12	10.4685	0.442095	8	7.39371	0.214356	14	9.11204	1.30636
1907	0	11	6.15676	1.46029	12	7.38751	1.33151	7	7.28454	-0.107546	7	7.06322	-0.023894	0	6	5.68389	0.129051	14	8.95103	1.34939	11	7.81361	0.960732	6	8.43082	-0.992377	0	11	6.3618	1.39847	21	10.4588	2.30029	8	7.38347	0.217975	7	9.10289	-0.794817
1908	0	5	6.13406	-0.507168	9	7.36531	0.544897	10	7.26184	0.865884	16	7.04088	2.23978	0	7	5.66713	0.503778	15	8.93489	1.56601	14	7.79734	1.65773	12	8.41422	1.03513	0	11	6.35068	1.40182	8	10.4491	-0.865878	13	7.37334	1.56055	8	9.09384	-0.38673
1909	0	6	6.1116	-0.0455618	8	7.34337	0.232155	10	7.23938	0.872986	8	7.0188	0.346906	0	6	5.65054	0.142666	5	8.91892	-1.7526	13	7.78123	1.44743	9	8.39781	0.20073	0	9	6.33966	0.886779	17	10.4395	1.59116	7	7.36331	-0.137318	14	9.08488	1.31362
1910	0	12	6.08938	1.70625	3	7.32167	-2.49512	12	7.21716	1.38069	8	6.99698	0.354621	0	4	5.63413	-0.817063	11	8.90314	0.632228	9	7.76529	0.41157	15	8.38158	1.70887	0	5	6.32875	-0.594235	16	10.43	1.3925	13	7.35338	1.56609	10	9.07603	0.292185
1911	0	9	6.0674	0.977533	8	7.30022	0.247408	13	7.19519	1.60997	3	6.97541	-2.29521	0	11	5.61788	1.62277	14	8.88753	1.36637	6	7.74952	-0.714239	11	8.36553	0.794324	0	4	6.31794	-1.15897	13	10.4206	0.715386	12	7.34355	1.3442	15	9.06727	1.53182
1912	0	3	6.04565	-1.75841	4	7.27902	-1.63951	9	7.17345	0.60885	12	6.9541	1.45663	0	6	5.6018	0.162563	11	8.87208	0.641591	6	7.73392	-0.70787	13	8.34965	1.28977	0	12	6.30724	1.64336	12	10.4114	0.458601	9	7.33382	0.555392	6	9.05861	-1.24867
1913	0	4	6.02413	-1.01207	5	7.25806	-1.00983	8	7.15195	0.299832	9	6.93303	0.688991	0	5	5.58589	-0.262019	12	8.85681	0.90736	7	7.71848	-0.27156	14	8.33395	1.51432	0	9	6.29664	0.901121	12	10.4022	0.461252	4	7.32419	-1.6621	7	9.05003	-0.77484
1914	0	8	6.00284	0.706101	7	7.23733	-0.0897037	8	7.13068	0.307351	8	6.9122	0.384595	0	5	5.57015	-0.254978	12	8.84171	0.911719	11	7.7032	0.994021	8	8.31842	-0.112578	0	12	6.28614	1.64945	15	10.3931	1.1895	7	7.31466	-0.118929	5	9.04156	-1.80744
1915	0	8	5.98178	0.713547	3	7.21685	-2.4346	8	7.10964	0.31479	5	6.89162	-0.845957	0	5	5.55457	-0.248009	7	8.82678	-0.690457	5	7.68809	-1.20215	12	8.30306	1.06722	0	4	6.27574	-1.13787	18	10.3841	1.79509	9	7.30522	0.564927	10	9.03317	0.305738
1916	0	5	5.96095	-0.429748	9	7.19659	0.601137	7	7.08883	-0.0335735	7	6.87127	0.0486546	0	9	5.53915	1.15362	15	8.81201	1.59773	9	7.67314	0.442288	2	8.28787	-4.4462	0	8	6.26544	0.613261	11	10.3752	0.188383	10	7.29588	0.855119	10	9.02488	0.30836
1917	0	10	5.94033	1.28378	4	7.17656	-1.58828	11	7.06824	1.18547	11	6.85116	1.25092	0	7	5.52388	0.557919	8	8.7974	-0.281923	6	7.65834	-0.677013	9	8.27284	0.242385	0	11	6.25523	1.4306	12	10.3664	0.471579	9	7.28663	0.571125	17	9.01667	1.93624
1918	1	8	5.91993	0.735415	11	7.15677	1.15878	9	7.04788	0.650708	6	6.83129	-0.339371	0	10	5.50878	1.42025	12	8.78295	0.928682	9	7.6437	0.452102	16	8.25798	1.9355	0	7	6.24513	0.285316	8	10.3577	-0.833569	10	7.27747	0.860939	16	9.00856	1.74786
1919	0	8	5.89975	0.742549	10	7.13719	0.9053	7	7.02773	-0.0104808	10	6.81164	1.00825	0	9	5.49384	1.16872	14	8.76867	1.39813	10	7.62921	0.749711	9	8.24329	0.252237	0	5	6.23512	-0.552361	13	10.3491	0.735236	6	7.26841	-0.517825	18	9.00053	2.1212
1920	0	5	5.87979	-0.393453	11	7.11784	1.17051	7	7.0078	-0.00294888	5	6.79222	-0.801506	0	6	5.47905	0.212679	7	8.75454	-0.663152	6	7.61487	-0.659268	12	8.22875	1.08866	0	12	6.2252	1.66704	9	10.3405	-0.446847	7	7.25943	-0.0980573	14	8.99259	1.33829
1921	0	9	5.86003	1.04665	2	7.09871	-3.60533	2	6.98809	-3.52711	8	6.77303	0.4338	0	6	5.46441	0.218655	6	8.74056	-1.11883	5	7.60069	-1.16306	6	8.21438	-0.904016	0	8	6.21538	0.630957	9	10.3321	-0.444033	5	7.25055	-1.00648	15	8.98474	1.55313
1922	0	4	5.88595	-0.942974	7	7.17083	-0.0645672	7	7.06218	-0.0235008	9	6.85323	0.71559	0	4	5.44992	-0.72496	11	8.72674	0.685413	11	7.58665	1.02916	8	8.20016	-0.0707669	1	8	6.20566	0.634396	8	10.3238	-0.821569	6	7.24176	-0.506947	11	8.97697	0.609967
1923	0	8	5.94289	0.7273	6	7.18194	-0.482523	7	7.07276	-0.0275009	4	6.85848	-1.42924	0	10	5.43558	1.44339	9	8.71307	0.0956427	10	7.57276	0.76756	9	8.1861	0.271301	0	5	6.19602	-0.534878	8	10.3155	-0.818646	13	7.23306	1.59946	12	8.96928	0.874892
1924	0	5	5.92243	-0.412524	6	7.16205	-0.474405	7	7.05233	-0.0197773	8	6.8385	0.410653	0	6	5.4214	0.236215	7	8.69955	-0.642371	5	7.55902	-1.14443	10	8.17219	0.578005	0	6	6.18648	-0.0761303	5	10.3073	-2.3735	9	7.22444	0.591853	10	8.96168	0.328345
1925	0	6	5.9022	0.0399282	8	7.14239	0.30321	7	7.03211	-0.0121369	7	6.81875	0.0685054	0	10	5.40735	1.45232	15	8.68619	1.63022	10	7.54542	0.776205	12	8.15843	1.10897	0	6	6.17703	-0.0722717	10	10.2992	-0.0946184	9	7.21591	0.594696	9	8.95416	0.0152788
1926	0	4	5.88218	-0.941088	8	7.12296	0.310082	7	7.01211	-0.00457904	8	6.79923	0.424535	0	8	5.39346	0.921552	13	8.67296	1.2001	9	7.53197	0.489344	12	8.14482	1.11289	0	12	6.16767	1.68365	9	10.2912	-0.4304	10	7.20747	0.883076	16	8.94673	1.76332
1927	0	4	5.86237	-0.931184	10	7.10374	0.915878	6	6.99233	-0.405119	9	6.77994	0.740019	0	7	5.3797	0.612415	13	8.65989	1.20373	14	7.51865	1.73221	11	8.13137	0.864926	0	8	6.15839	0.651106	13	10.2833	0.753484	10	7.19911	0.88572	10	8.93937	0.335402
1928	0	7	5.84277	0.437391	12	7.08474	1.41891	7	6.97277	0.0102924	8	6.76087	0.438097	0	10	5.36609	1.46537	8	8.64695	-0.228733	4	7.50548	-1.75274	12	8.11806	1.12062	0	7	6.18934	0.3064	12	10.3398	0.479264	6	7.23271	-0.503252	8	8.99225	-0.350814
1929	0	5	5.82339	-0.368229	5	7.06596	-0.923927	10	6.95341	0.963415	4	6.74203	-1.37101	0	9	5.35262	1.21579	8	8.63416	-0.22421	7	7.49245	-0.186127	12	8.10489	1.12442	0	8	6.23091	0.625466	8	10.3588	-0.833962	11	7.27408	1.12341	10	9.01591	0.311196
1930	0	7	5.8042	0.451969	9	7.04739	0.650869	7	6.93427	0.0248445	7	6.7234	0.104546	0	7	5.33929	0.627689	9	8.62151	0.126163	6	7.47955	-0.604023	9	8.09187	0.30271	0	8	6.22094	0.628993	16	10.3501	1.41247	6	7.265	-0.516432	9	9.00775	-0.00258287
1931	0	7	5.78522	0.459142	7	7.02904	-0.010975	4	6.91533	-1.45766	7	6.70498	0.111506	1	5	5.3261	-0.145835	12	8.609	0.978897	6	7.46678	-0.598812	11	8.07899	0.880718	0	7	6.21106	0.298192	10	10.3415	-0.107989	9	7.25601	0.581331	10	8.99967	0.316331
1932	0	7	5.76645	0.466239	6	7.01089	-0.412693	8	6.89659	0.390113	9	6.68678	0.771073	1	9	5.31304	1.22899	13	8.59662	1.22128	12	7.45415	1.31227	8	8.06625	-0.0234229	0	7	6.20127	0.301891	12	10.333	0.481229	7	7.24711	-0.0933991	11	8.99169	0.60553
1933	0	6	5.74787	0.102931	10	6.99294	0.950915	12	6.87806	1.47858	6	6.66879	-0.273033	0	11	5.30012	1.71858	8	8.58439	-0.206612	7	7.44166	-0.166931	9	8.05365	0.31545	0	11	6.19158	1.44979	11	10.3245	0.203657	11	7.2383	1.13419	10	8.98378	0.321356
1934	0	5	5.72949	-0.326239	8	6.9752	0.36232	7	6.85973	0.0530186	4	6.65101	-1.3255	0	3	5.28733	-1.32059	8	8.57228	-0.202332	9	7.42929	0.523569	5	8.04119	-1.36006	0	13	6.18198	1.89098	12	10.3162	0.486069	8	7.22959	0.272382	10	8.97597	0.323826
1935	0	5	5.71131	-0.318107	10	6.95766	0.962071	10	6.84159	0.998777	8	6.63343	0.483156	0	4	5.27467	-0.637334	9	8.56031	0.146563	9	7.41706	0.527648	11	8.02886	0.895832	0	5	6.17247	-0.524346	18	10.3079	1.81303	9	7.22096	0.593014	13	8.96824	1.11821
1936	0	7	5.69332	0.49388	7	6.94032	0.022556	7	6.82365	0.0666543	7	6.61606	0.145118	0	5	5.30176	-0.134953	9	8.60196	0.132682	11	7.45123	1.06999	14	8.0694	1.58502	0	8	6.16306	0.649457	11	10.2998	0.211121	10	7.21242	0.881512	11	8.9606	0.614903
1937	0	11	5.67552	1.60539	8	6.92318	0.380714	15	6.8059	2.11571	9	6.59888	0.800373	0	9	5.37743	1.20752	7	8.67864	-0.634467	9	7.5277	0.490767	10	8.14623	0.586214	1	6	6.15373	-0.0627609	13	10.2917	0.751144	5	7.20396	-0.98564	10	8.95304	0.331079
1938	0	10	5.65791	1.37309	2	6.90623	-3.46923	6	6.78835	-0.321841	11	6.5819	1.33211	0	9	5.41265	1.19578	8	8.70097	-0.24783	11	7.55705	1.03809	4	8.16944	-2.08472	0	10	6.1445	1.21922	14	10.2837	0.993218	4	7.19559	-1.59779	16	8.94556	1.76361
1939	0	2	5.64048	-2.57421	7	6.88947	0.0417773	5	6.77098	-0.792006	7	6.56512	0.164368	0	8	5.39862	0.919728	9	8.68751	0.104163	9	7.54342	0.485528	10	8.15562	0.583244	0	6	6.13535	-0.0552553	15	10.2758	1.21978	5	7.1873	-0.978191	12	8.93816	0.883877
1940	1	7	5.62324	0.520366	7	6.8729	0.0480398	7	6.7538	0.0930553	2	6.54854	-3.2163	0	6	5.38473	0.251183	13	8.6742	1.19976	12	7.52993	1.2904	6	8.14195	-0.87445	0	3	6.12629	-1.80496	9	10.268	-0.42266	11	7.1791	1.15204	6	8.93084	-1.19651
1941	0	4	5.60618	-0.803091	5	6.85652	-0.830259	4	6.7368	-1.3684	12	6.53214	1.57844	0	11	5.37099	1.69721	10	8.66104	0.423416	11	7.51658	1.05029	13	8.12844	1.35113	1	7	6.11731	0.333624	12	10.2602	0.502226	9	7.17098	0.609673	15	8.92361	1.56892
1942	0	4	5.58931	-0.794653	4	6.84032	-1.42016	7	6.71999	0.105833	10	6.51593	1.10176	0	3	5.35738	-1.36104	9	8.64803	0.117325	14	7.50338	1.7363	3	8.11507	-2.95319	0	6	6.10843	-0.0442642	7	10.2526	-1.22936	11	7.16294	1.15692	6	8.91645	-1.19064
1943	0	6	5.57261	0.174482	10	6.8243	1.00424	6	6.70336	-0.287145	7	6.49991	0.189015	0	13	5.34392	2.12341	10	8.63515	0.431603	7	7.49031	-0.185319	9	8.10185	0.299383	0	5	6.13975	-0.509714	15	10.3093	1.21112	10	7.19686	0.886429	5	8.96953	-1.77523
1944	0	4	5.60155	-0.800773	6	6.89951	-0.367223	6	6.78049	-0.318635	8	6.58325	0.500897	0	11	5.3306	1.70939	6	8.62242	-1.0706	7	7.47738	-0.180433	9	8.08878	0.303741	0	7	6.18171	0.309287	11	10.3286	0.20243	7	7.23855	-0.0901619	7	8.99339	-0.753429
1945	0	7	5.66147	0.505915	13	6.91366	1.68805	9	6.79409	0.735303	13	6.5916	1.77737	0	8	5.31742	0.948435	8	8.60983	-0.215608	16	7.46459	2.13385	7	8.07584	-0.406631	0	14	6.1721	2.09209	10	10.3202	-0.101247	4	7.22978	-1.61489	11	8.98541	0.60742
1946	0	4	5.64398	-0.821989	13	6.89679	1.69273	14	6.77664	1.93053	7	6.57468	0.160756	0	3	5.30437	-1.33043	10	8.59738	0.443547	5	7.45193	-1.09654	10	8.06305	0.612516	0	7	6.16259	0.316509	9	10.3118	-0.437272	5	7.2211	-0.993307	8	8.97753	-0.34561
1947	0	6	5.62667	0.152412	5	6.88011	-0.840808	8	6.75937	0.438629	8	6.55796	0.509839	0	7	5.29146	0.645766	12	8.58507	0.985807	10	7.4394	0.809731	7	8.0504	-0.397016	0	7	6.19331	0.3049	10	10.3679	-0.116339	12	7.25439	1.36994	16	9.0299	1.74253
1948	1	7	5.60954	0.525543	9	6.86361	0.71213	7	6.74229	0.0974054	9	6.54143	0.819523	0	11	5.27869	1.72504	6	8.57289	-1.05038	8	7.42701	0.202582	11	8.03789	0.893109	0	9	6.23466	0.921782	10	10.3865	-0.122221	12	7.29544	1.35809	9	9.05305	-0.0176827
1949	0	10	5.5926	1.39374	11	6.8473	1.25208	5	6.72539	-0.771619	7	6.52509	0.179498	0	2	5.26604	-2.30944	16	8.56084	1.85979	10	7.41475	0.817528	17	8.02552	2.17663	1	12	6.22445	1.66726	9	10.3774	-0.459128	10	7.28606	0.858224	9	9.04438	-0.0147931
1950	0	11	5.57584	1.63545	8	6.83118	0.41324	9	6.70868	0.763774	7	6.50894	0.185602	0	2	5.25353	-2.30059	9	8.54893	0.150356	9	7.40262	0.532462	9	8.01328	0.328906	0	5	6.21435	-0.543075	10	10.3684	-0.116488	10	7.27677	0.861162	9	9.03581	-0.0119355
1951	0	7	5.55925	0.544552	5	6.81524	-0.8118	6	6.69214	-0.282567	6	6.49298	-0.201258	0	4	5.24115	-0.620574	12	8.53715	0.999638	9	7.39061	0.536463	6	8.00118	-0.816977	0	4	6.20435	-1.10217	11	10.3595	0.193133	7	7.26757	-0.101132	14	9.02733	1.329
1952	0	5	5.5883	-0.263095	9	6.89052	0.703161	7	6.76938	0.0871679	11	6.57637	1.33377	0	6	5.22889	0.314804	8	8.5255	-0.185793	9	7.37873	0.540423	6	7.98921	-0.81209	0	8	6.19445	0.63836	14	10.3506	0.975337	6	7.25847	-0.513768	11	9.01894	0.597311
1953	0	5	5.64834	-0.289945	9	6.90474	0.698419	6	6.78307	-0.319686	7	6.58478	0.156939	0	9	5.21676	1.26108	10	8.51398	0.469921	6	7.36698	-0.558065	5	7.97736	-1.33152	0	10	6.18464	1.20652	17	10.3419	1.61483	7	7.24946	-0.0942869	6	9.01065	-1.22909
1954	0	3	5.63095	-1.51898	7	6.88794	0.0423544	10	6.76571	1.02277	7	6.56792	0.163312	0	7	5.20476	0.678537	9	8.50258	0.165805	8	7.35534	0.22792	8	7.96565	0.012143	1	6	6.17492	-0.071412	10	10.3333	-0.105386	9	7.24054	0.586486	12	9.00245	0.865318
1955	0	9	5.61375	1.12875	8	6.87133	0.399045	9	6.74854	0.750488	7	6.55125	0.169611	1	4	5.19288	-0.596441	11	8.49131	0.756397	10	7.34384	0.839953	12	7.95407	1.16796	0	7	6.20544	0.300317	13	10.3891	0.724144	19	7.27359	2.69022	13	9.0545	1.09428
1956	0	12	5.59673	1.84847	8	6.85491	0.404852	9	6.73155	0.756151	6	6.53478	-0.218323	0	11	5.18113	1.75446	18	8.48017	2.24385	9	7.33245	0.555851	12	7.94262	1.17127	0	9	6.24658	0.917806	14	10.4074	0.960166	12	7.31442	1.35261	13	9.07734	1.08795
1957	0	4	5.57989	-0.789947	5	6.83867	-0.822278	12	6.71474	1.52572	11	6.5185	1.35122	0	10	5.16949	1.52754	11	8.46914	0.763082	8	7.32118	0.24	9	7.93128	0.356239	2	3	6.23618	-1.86841	15	10.398	1.18823	10	7.3048	0.852298	7	9.06837	-0.78177
1958	0	8	5.56323	0.861527	6	6.82262	-0.335832	10	6.69812	1.04415	5	6.5024	-0.671895	0	11	5.15798	1.76144	13	8.45824	1.25966	8	7.31003	0.243942	9	7.92008	0.359974	2	7	6.22589	0.292587	16	10.3887	1.40282	5	7.29528	-1.02648	6	9.05949	-1.24903
1959	0	7	5.54675	0.549275	8	6.80675	0.421879	10	6.68168	1.04935	11	6.48649	1.36087	0	8	5.14658	1.00883	7	8.44746	-0.547088	10	7.299	0.854132	9	7.90899	0.363669	0	11	6.21569	1.44252	20	10.3795	2.1512	8	7.28586	0.252487	11	9.05072	0.587731
1960	0	7	5.53045	0.555439	12	6.79105	1.50369	5	6.66541	-0.744794	10	6.47077	1.11604	0	7	5.17493	0.689812	7	8.49028	-0.563272	4	7.33436	-1.66718	11	7.95076	0.91938	0	8	6.24573	0.620228	8	10.4348	-0.860832	6	7.31841	-0.538239	10	9.1022	0.283909
1961	0	6	5.51431	0.19828	3	6.77554	-2.17981	10	6.64932	1.05958	11	6.45522	1.3703	0	8	5.21221	0.985632	6	8.51465	-1.0266	6	7.36572	-0.557554	8	7.97607	0.00845971	0	7	6.2864	0.269714	4	10.4526	-3.2263	10	7.35874	0.83524	11	9.12448	0.565491
1962	0	6	5.49835	0.204796	5	6.7602	-0.787186	8	6.6334	0.483166	6	6.43986	-0.179572	1	6	5.20022	0.326511	14	8.50321	1.46908	5	7.35408	-1.05278	15	7.96433	1.8166	0	8	6.27554	0.609689	15	10.4427	1.1767	5	7.34863	-1.05034	12	9.11495	0.832842
1963	0	5	5.48256	-0.215808	11	6.74504	1.28292	6	6.61765	-0.252156	7	6.42467	0.217454	0	8	5.18834	0.99407	10	8.49189	0.476905	6	7.34256	-0.548096	6	7.95272	-0.797194	0	10	6.36666	1.14896	8	10.5962	-0.917902	6	7.44493	-0.589892	15	9.25824	1.48252
1964	0	8	5.46694	0.895573	11	6.73004	1.28744	6	6.60208	-0.245797	5	6.40966	-0.630418	0	3	5.1766	-1.25666	6	8.48071	-1.01274	8	7.33115	0.236473	9	7.94123	0.352922	0	8	6.58651	0.499744	19	10.8178	1.87712	10	7.66714	0.737717	9	9.47998	-0.159994
1965	0	6	5.45148	0.223933	12	6.71522	1.52558	5	6.58667	-0.709579	14	6.39482	2.03257	0	7	5.16497	0.693576	8	8.46964	-0.166044	6	7.31987	-0.538836	18	7.92987	2.37355	1	2	6.70214	-3.32491	13	10.8736	0.589747	8	7.78067	0.0775433	14	9.54646	1.19026
1966	0	8	5.43618	0.906446	8	6.70057	0.459419	7	6.57142	0.161987	10	6.38015	1.1447	0	5	5.15346	-0.0686315	11	8.4587	0.766231	8	7.30871	0.244407	8	7.91864	0.0287652	0	9	6.68682	0.771058	13	10.859	0.593809	12	7.76608	1.22223	10	9.53209	0.147967
1967	0	8	5.42105	0.911796	5	6.68607	-0.754036	10	6.55634	1.08898	4	6.36565	-1.18282	0	5	5.1817	-0.081259	13	8.50136	1.2477	10	7.34395	0.839917	11	7.96026	0.916516	0	10	6.67167	1.05251	16	10.8445	1.28887	9	7.75163	0.416122	8	9.51788	-0.53665
1968	0	8	5.40608	0.91709	4	6.67175	-1.33587	10	6.54143	1.0937	13	6.35131	1.84401	0	2	5.21887	-2.27609	4	8.52557	-2.26279	7	7.37518	-0.141806	10	7.98543	0.637064	0	4	6.65666	-1.32833	15	10.8302	1.07664	7	7.73734	-0.278689	8	9.50383	-0.531682
1969	0	11	5.39126	1.6911	10	6.65758	1.05696	7	6.52667	0.178902	10	6.33714	1.1583	1	7	5.20677	0.677776	13	8.51398	1.2442	8	7.36341	0.225067	8	7.97354	0.00935475	1	5	6.64181	-0.73424	16	10.816	1.296	4	7.7232	-1.8616	13	9.48993	0.973517
1970	0	7	5.37661	0.613584	6	6.64358	-0.26274	4	6.51207	-1.25604	6	6.32314	-0.131921	0	7	5.1948	0.682302	9	8.50252	0.165827	8	7.35177	0.229184	10	7.96179	0.64454	0	9	6.62711	0.790964	6	10.802	-1.96041	15	7.7092	1.88248	14	9.4762	1.20904
1971	0	8	5.36211	0.932636	15	6.62973	2.16119	10	6.49763	1.10755	8	6.30929	0.597755	0	6	5.18295	0.333561	9	8.49118	0.169606	9	7.34025	0.553251	8	7.95016	0.0176206	0	8	6.65269	0.476347	13	10.8525	0.595608	13	7.73722	1.45963	5	9.52279	-2.02265
1972	0	6	5.34776	0.266276	8	6.61604	0.489304	9	6.48334	0.838886	4	6.29561	-1.1478	0	5	5.17122	-0.0765712	4	8.47997	-2.23998	10	7.32885	0.844693	10	7.93866	0.651852	0	9	6.68895	0.77035	8	10.8656	-1.01313	8	7.77308	0.0802297	13	9.54023	0.959568
1973	0	7	5.33357	0.629853	11	6.6025	1.3259	14	6.46921	2.01269	2	6.28208	-3.02788	0	9	5.15961	1.28013	7	8.46888	-0.555186	13	7.31756	1.57602	6	7.92729	-0.786815	0	6	6.67373	-0.275047	14	10.851	0.841604	10	7.75854	0.708811	11	9.52591	0.444453
1974	0	3	5.31952	-1.33918	7	6.58912	0.155298	5	6.45523	-0.650797	4	6.2687	-1.13435	0	13	5.18775	2.16673	10	8.5114	0.470736	12	7.35269	1.34156	8	7.96878	0.0110376	0	7	6.65865	0.129017	8	10.8366	-1.00289	7	7.74416	-0.281266	11	9.51177	0.448719
1975	1	6	5.30562	0.283478	9	6.57589	0.808038	10	6.44139	1.12533	4	6.25548	-1.12774	0	5	5.22483	-0.100545	10	8.53547	0.463124	8	7.38381	0.217858	9	7.99381	0.335395	0	11	6.68387	1.30136	9	10.8867	-0.628896	15	7.7718	1.86631	13	9.55794	0.954656
1976	0	6	5.29187	0.289092	7	6.5628	0.165245	7	6.42771	0.216305	11	6.24241	1.43447	0	3	5.21263	-1.27746	12	8.52374	1.00351	10	7.37192	0.831071	10	7.9818	0.638211	0	6	6.71977	-0.293846	12	10.8994	0.317725	6	7.80728	-0.737818	11	9.57497	0.429662
1977	0	11	5.27827	1.72517	8	6.54987	0.5127	4	6.41418	-1.20709	11	6.22949	1.43836	0	5	5.20056	-0.0896917	10	8.51214	0.470502	9	7.36016	0.546612	14	7.96992	1.61161	0	10	6.70419	1.04223	6	10.8844	-1.99405	8	7.79237	0.0734075	7	9.56026	-0.967686
1978	0	4	5.26481	-0.632404	6	6.53707	-0.21926	4	6.40078	-1.20039	6	6.21672	-0.088476	0	11	5.18861	1.7522	10	8.50067	0.47413	7	7.34853	-0.131732	5	7.95817	-1.32293	1	8	6.68877	0.463591	7	10.8696	-1.46257	5	7.77762	-1.24219	10	9.54571	0.143659
1979	0	8	5.29695	0.955673	11	6.61546	1.32199	8	6.48112	0.537004	4	6.30327	-1.15163	0	10	5.17679	1.52523	11	8.48932	0.756997	12	7.33702	1.34609	14	7.94654	1.61785	1	7	6.6735	0.123405	16	10.855	1.28626	6	7.76302	-0.719752	13	9.53133	0.962036
1980	0	8	5.36004	0.933365	9	6.63277	0.789078	5	6.49789	-0.669877	7	6.31479	0.258985	0	9	5.16509	1.2783	9	8.4781	0.173965	8	7.32563	0.238426	11	7.93505	0.924117	0	8	6.65839	0.474331	11	10.8405	0.0480899	7	7.74858	-0.282937	10	9.51711	0.152703

## Sheet: Lifeteim Fits Summary
n	condition	T1	A1	T2	A2	Tavg	Chi2
1/mops20/+atp	mut	2.27119e-09	0.107348	3.17773e-09	0.0311189	2.47493e-09	1.43637
1/mops20/+atp	wt	2.43349e-09	0.132976	4.19679e-09	0.00595325	2.50905e-09	1.50067
1/mops20/+atp	wt-cy3	2.22837e-09	0.1024	3.12033e-09	0.0380193	2.46988e-09	1.54794
1/mops20/+atp	mut-cy3	2.31388e-09	0.118801	3.43297e-09	0.019354	2.47065e-09	1.41349
1/mops20/-atp	mut	2.3396e-09	0.122073	3.55551e-09	0.0163463	2.48319e-09	1.4092
1/mops20/-atp	wt	2.20901e-09	0.0935563	3.05151e-09	0.0458172	2.48597e-09	1.39897
1/mops20/-atp	wt-cy3	2.04641e-09	0.0993209	3.00397e-09	0.0402177	2.32239e-09	1.34059
1/mops20/-atp	mut-cy3	2.03985e-09	0.0919204	2.88281e-09	0.0474089	2.32668e-09	1.28247
1/mops150/+atp	mut	2.11991e-09	0.0835775	2.91648e-09	0.0568035	2.44223e-09	1.33034
1/mops150/+atp	wt	2.31562e-09	0.122828	3.42945e-09	0.0170894	2.45166e-09	1.5171
1/mops150/+atp	wt-cy3	2.23164e-09	0.109596	3.17788e-09	0.0303777	2.437e-09	1.34382
1/mops150/+atp	mut-cy3	2.28445e-09	0.115004	3.25964e-09	0.0236675	2.45089e-09	1.40155
1/mops150/-atp	mut	2.23274e-09	0.0955885	2.96634e-09	0.0440106	2.46402e-09	1.56266
1/mops150/-atp	wt	2.13445e-09	0.0825152	2.90953e-09	0.0555695	2.44637e-09	1.58888
1/mops150/-atp	wt-cy3	2.13171e-09	0.103729	3.08215e-09	0.0366779	2.37999e-09	1.37727
1/mops150/-atp	mut-cy3	2.0723e-09	0.0964351	2.9221e-09	0.0424903	2.33221e-09	1.36919
3/mops20/+atp	mut	2.18369e-09	0.080393	3.00262e-09	0.0479575	2.48968e-09	1.25493
3/mops20/+atp	wt	2.30819e-09	0.100606	3.26678e-09	0.0259238	2.50458e-09	1.30627
3/mops20/+atp	wt-cy3	2.15093e-09	0.0718569	2.93987e-09	0.0538694	2.48896e-09	1.29701
3/mops20/+atp	mut-cy3	2.2839e-09	0.116699	3.25778e-09	0.0316483	2.49167e-09	1.31845
3/mops20/-atp	mut	2.35706e-09	0.110809	3.42015e-09	0.0165839	2.49545e-09	1.34064
3/mops20/-atp	wt	2.22344e-09	0.0896975	3.12198e-09	0.0361239	2.48141e-09	1.34354
3/mops20/-atp	wt-cy3	1.97917e-09	0.075833	2.86001e-09	0.0505966	2.33168e-09	1.29769
3/mops20/-atp	mut-cy3	2.13752e-09	0.0948895	3.12557e-09	0.0310833	2.38132e-09	1.34251
3/mops150/+atp	mut	2.15816e-09	0.0699759	2.86828e-09	0.0557405	2.47302e-09	1.29371
3/mops150/+atp	wt	2.35815e-09	0.114349	3.55797e-09	0.012236	2.47413e-09	1.38662
3/mops150/+atp	wt-cy3	2.18454e-09	0.078204	2.91852e-09	0.047215	2.46086e-09	1.26633
3/mops150/+atp	mut-cy3	2.16962e-09	0.0818009	2.98427e-09	0.0447636	2.45775e-09	1.27775
3/mops150/-atp	mut	2.23999e-09	0.0929216	3.05083e-09	0.0343764	2.45896e-09	1.34557
3/mops150/-atp	wt	2.18762e-09	0.083115	2.96942e-09	0.0428285	2.45348e-09	1.23977
3/mops150/-atp	wt-cy3	2.11318e-09	0.0823819	2.93506e-09	0.0440978	2.39973e-09	1.25884
3/mops150/-atp	mut-cy3	2.0115e-09	0.0735469	2.80341e-09	0.0542343	2.34761e-09	1.25148
2/mops20/+atp	mut	2.2478e-09	0.105012	3.16024e-09	0.0361454	2.48144e-09	1.437
2/mops20/+atp	wt	2.18774e-09	0.0926171	3.06195e-09	0.0471005	2.48245e-09	1.51536
2/mops20/+atp	wt-cy3	2.2955e-09	0.114863	3.33434e-09	0.0248883	2.48051e-09	1.34325
2/mops20/+atp	mut-cy3	2.18495e-09	0.0972595	3.08492e-09	0.0419232	2.45603e-09	1.27514
2/mops20/-atp	mut	2.20233e-09	0.0985645	3.1125e-09	0.0398667	2.46445e-09	1.36479
2/mops20/-atp	wt	2.22484e-09	0.101065	3.12566e-09	0.0389966	2.47565e-09	1.50189
2/mops20/-atp	wt-cy3	1.97023e-09	0.0859064	2.87991e-09	0.0556055	2.32768e-09	1.43886
2/mops20/-atp	mut-cy3	2.05967e-09	0.101115	3.01867e-09	0.0394573	2.32885e-09	1.35789
2/mops150/+atp	mut	2.3171e-09	0.121315	3.40025e-09	0.0185442	2.46072e-09	1.43985
2/mops150/+atp	wt	2.14399e-09	0.0875392	2.94525e-09	0.0533887	2.44753e-09	1.50962
2/mops150/+atp	wt-cy3	2.32824e-09	0.121486	3.37074e-09	0.0172977	2.45817e-09	1.42946
2/mops150/+atp	mut-cy3	2.41048e-09	0.134091	4.79432e-09	0.00314883	2.46517e-09	1.51859
2/mops150/-atp	mut	2.2175e-09	0.101896	3.05868e-09	0.0370695	2.44189e-09	1.44929
2/mops150/-atp	wt	2.15951e-09	0.09022	2.96968e-09	0.0494321	2.44628e-09	1.48664
2/mops150/-atp	wt-cy3	2.17064e-09	0.105827	3.08732e-09	0.0333091	2.3901e-09	1.42958
2/mops150/-atp	mut-cy3	2.0211e-09	0.0873381	2.85159e-09	0.0528802	2.3343e-09	1.48477

## Sheet: Lifetime Stats
Conditions	Average Lifetime	FRET Efficiency (%)		P value	P value
WT				WT vs E525K Lifetime	WT vs E525K FRET
GFP-Alone: 20 mM KCl	2.48±0.01
GFP+ATP: 20 mM KCl	2.50±0.01
GFP+Cy3ATP: 20 mM KCl	2.33±0.01	6.20±0.33
GFP+Cy3ATP: 20 mM KCl (ATP chase)	2.48±0.01
GFP-Alone: 150 mM KCl	2.45±0.01
GFP+ATP: 150 mM KCl	2.46±0.01
GFP+Cy3ATP: 150 mM KCl	2.39±0.01	2.40±0.27
GFP+Cy3ATP: 150 mM KCl (ATP chase)	2.45±0.01
E525K
GFP-Alone: 20 mM KCl	2.48±0.02
GFP+ATP: 20 mM KCl	2.48±0.01
GFP+Cy3ATP: 20 mM KCl	2.35±0.03	5.46±0.87		0.3349	0.23
GFP+Cy3ATP: 20 mM KCl (ATP chase)	2.47±0.02
GFP-Alone: 150 mM KCl	2.45±0.01
GFP+ATP: 150 mM KCl	2.46±0.01
GFP+Cy3ATP: 150 mM KCl	2.34±0.01	4.76±0.51		0.0036	0.0021
GFP+Cy3ATP: 150 mM KCl (ATP chase)	2.46±0.01

## Sheet: FRET Stats
Conditions	FRET Efficiency (%)	Predicted FRET Efficiency (%)	P value WT vs E525K
WT
20 mM KCl	5.41±0.33	5.34±0.05
50 mM KCl	4.77±0.07	3.45±0.30
75 mM KCl	3.71±0.59	2.44±0.45
100 mM KCl	2.67±0.22	0.92±0.19
150 mM KCl	1.66±0.17	0.78±0.10
E525K
20 mM KCl	5.78±0.78	5.70±0.04	0.0013
50 mM KCl	5.14±0.65	5.65±0.04	0.0018
75 mM KCl	5.46±0.53	5.51±0.09	0.0001
100 mM KCl	4.94±0.13	5.38±0.14	0.0001
150 mM KCl	4.36±0.16	4.76±0.19	0.0001
