# Supplementary material for: Dilated cardiomyopathy mutation E525K in human beta-cardiac myosin stabilizes the interacting-heads motif and super-relaxed state of myosin
Source: eLife journal article supplement (doi:10.7554/elife.77415), 2022-11-08
Supplement: fig5-figsupp1-data1 [file Figure 5-figure supp 1-source data 1.xlsx]

## Sheet: Sheet1
	Wild-Type (Donor)			Wild-Type (Donor + Acceptor			E525K (Donor)			E525K (Donor + Acceptor)
Time (ns)	Decay	Fit	Residuals	Decay	Fit	Residuals	Decay	Fit	Residuals	Decay	Fit	Residuals			Lifetime (1)	Weight (1)	Lifetime (2)	Weight (2)	Average Lifetime	Chi^2
0.105631	4	3.97046	0.0147692	10	5.37429	1.46278	10	5.13046	1.53988	7	5.07425	0.727866		E525K (Donor)	2.11601e-09	0.0819271	2.94922e-09	0.0571903	2.45854e-09	1.34029
0.237671	4	3.97046	0.0147692	9	5.37429	1.20857	4	5.13046	-0.565229	8	5.07425	1.03441		WT (Donor)	2.21098e-09	0.0962367	3.10549e-09	0.0403374	2.47518e-09	1.35857
0.36971	6	3.97046	0.828556	9	5.37429	1.20857	12	5.13046	1.98307	5	5.07425	-0.0332049		WT (Donor+Acceptor)	2.05412e-09	0.0952026	3.00596e-09	0.0411007	2.34114e-09	1.31214
0.50175	8	3.97046	1.42466	9	5.37429	1.20857	8	5.13046	1.01454	15	5.07425	2.56282		E525K (Donor+Acceptor)	1.94945e-09	0.0817609	2.84519e-09	0.0572921	2.31851e-09	1.38193
0.633789	9	3.97046	1.67651	7	5.37429	0.614459	11	5.13046	1.76973	4	5.07425	-0.537124
0.765828	9	4.20868	1.59711	9	5.61045	1.12985	12	5.37201	1.91334	7	5.31488	0.636916
0.897868	8	4.19603	1.34491	5	5.59713	-0.267046	3	5.35907	-1.36201	11	5.30114	1.71827
1.02991	4	4.18406	-0.0920303	11	5.58459	1.63281	8	5.34684	0.938034	9	5.2882	1.23727
1.16195	9	4.17274	1.60909	7	5.57277	0.539444	13	5.33528	2.12581	8	5.27603	0.96307
1.29399	17	5.08341	2.8902	13	6.77531	1.72642	14	6.56863	1.98612	19	6.54317	2.85779
1.42602	64	35.886	3.51425	83	45.9151	4.07059	96	46.6766	5.03405	99	47.6265	5.16323
1.55806	1064	973.215	2.7832	1258	1196.71	1.72787	1339	1225.66	3.09749	1345	1251.19	2.55797
1.6901	5908	6102.5	-2.53047	6229	6494.34	-3.36192	6331	6647.61	-3.97916	6530	6678.81	-1.84149
1.82214	9354	9694.29	-3.5184	9628	9716.08	-0.897636	9761	9956.98	-1.98362	9940	9912.63	0.274506
1.95418	9669	9798.55	-1.31744	9547	9673.5	-1.29462	9871	9938.82	-0.68262	9922	9846.35	0.759481
2.08622	9512	9337.31	1.79114	9284	9180.27	1.07658	9465	9459.46	0.0569546	9539	9336.51	2.07322
2.21826	8863	8853.27	0.103358	8600	8674.05	-0.798457	8865	8964.02	-1.0517	8816	8815.21	0.0084454
2.3503	8323	8390.69	-0.741939	8130	8193.49	-0.704177	8530	8492.11	0.410237	8216	8321.05	-1.15899
2.48234	8057	7952.26	1.16692	7486	7739.63	-2.93142	7982	8044.99	-0.70504	7745	7854.82	-1.24785
2.61438	7683	7537.24	1.66297	7504	7311.52	2.22202	7804	7621.91	2.06119	7315	7415.46	-1.17462
2.74642	7108	7146.47	-0.4563	6887	6909.74	-0.274042	7224	7223.69	0.00360779	6895	7003.52	-1.30687
2.87846	6858	6773.73	1.01762	6606	6528.31	0.955923	6902	6844.39	0.693435	6696	6612.85	1.01611
3.0105	6394	6419.93	-0.324316	6327	6167.31	2.00754	6646	6484.28	1.98375	6305	6243.44	0.775295
3.14254	6159	6084.67	0.947074	5804	5826.54	-0.295876	6335	6143.28	2.40878	6027	5895.03	1.69987
3.27458	5857	5768.26	1.15951	5707	5506.25	2.65734	5978	5821.82	2.01999	5560	5567.88	-0.105717
3.40662	5728	5467.79	3.43818	5365	5203.12	2.21012	5575	5516.63	0.781764	5328	5258.51	0.952044
3.53865	5299	5182.41	1.60163	4924	4916.3	0.109741	5312	5226.98	1.16658	5200	4966.03	3.24453
3.67069	4966	4912.18	0.763728	4656	4645.67	0.151426	5061	4952.84	1.5204	4717	4690.29	0.388952
3.80273	4733	4655.9	1.1207	4445	4389.91	0.826252	4674	4692.98	-0.277663	4530	4429.9	1.48724
3.93477	4350	4413.42	-0.961541	4317	4148.77	2.56036	4418	4447.24	-0.439914	4202	4184.58	0.268739
4.06681	4178	4183.96	-0.0922589	3942	3921.48	0.326848	4275	4214.91	0.919022	3964	3953.53	0.166372
4.19885	4043	3966.67	1.20044	3757	3706.78	0.819269	3926	3994.8	-1.09808	3780	3735.41	0.725306
4.33089	3747	3760.79	-0.225221	3540	3504.14	0.602626	3691	3786.44	-1.57092	3634	3529.69	1.73034
4.46293	3505	3565.84	-1.02773	3308	3312.93	-0.0856771	3556	3589.24	-0.557331	3323	3335.7	-0.220252
4.59497	3307	3381.38	-1.29333	3074	3132.59	-1.05678	3452	3402.7	0.839055	3120	3152.86	-0.588286
4.72701	3246	3206.69	0.690007	2922	2962.39	-0.747188	3264	3226.13	0.662783	2941	2980.4	-0.726597
4.85905	2971	3041.13	-1.28668	2937	2801.62	2.49811	3003	3058.86	-1.01939	2730	2817.6	-1.67653
4.99109	2859	2884.34	-0.473884	2765	2649.85	2.18984	2908	2900.5	0.139053	2703	2664	0.750129
5.12313	2707	2735.83	-0.554145	2442	2506.57	-1.30674	2730	2750.57	-0.393611	2558	2519.07	0.769629
5.25517	2625	2595.16	0.582324	2403	2371.3	0.646674	2658	2608.6	0.958245	2394	2382.32	0.238804
5.38721	2366	2461.92	-1.97189	2209	2243.57	-0.735497	2509	2474.16	0.695551	2182	2253.25	-1.52527
5.51924	2290	2335.68	-0.954677	2156	2122.95	0.711809	2306	2346.85	-0.850593	2108	2131.43	-0.510243
5.65128	2319	2216.09	2.13691	2034	2009.03	0.553581	2172	2226.27	-1.16445	1939	2016.43	-1.75843
5.78332	2094	2102.79	-0.192078	1783	1901.44	-2.80495	2161	2112.06	1.05272	1888	1907.87	-0.4572
5.91536	1981	1995.43	-0.324229	1770	1799.81	-0.708527	1992	2003.88	-0.266238	1802	1805.36	-0.079166
6.0474	1851	1893.7	-0.992491	1747	1703.8	1.03359	1907	1901.4	0.128169	1698	1708.57	-0.256409
6.17944	1763	1797.3	-0.816795	1592	1613.09	-0.528621	1743	1804.32	-1.46866	1537	1617.15	-2.04448
6.31148	1657	1705.93	-1.2021	1495	1527.39	-0.837593	1715	1712.33	0.064489	1540	1530.81	0.23411
6.44352	1536	1619.34	-2.12651	1373	1446.4	-1.98082	1543	1625.17	-2.09184	1443	1449.26	-0.164662
6.57556	1506	1537.27	-0.805731	1422	1369.86	1.3827	1550	1542.58	0.188531	1320	1372.21	-1.43692
6.7076	1477	1459.47	0.456118	1258	1297.52	-1.11424	1409	1464.31	-1.4734	1206	1299.41	-2.68973
6.83964	1380	1385.72	-0.154016	1294	1229.14	1.80299	1326	1390.13	-1.761	1256	1230.62	0.716204
6.97168	1311	1315.81	-0.132715	1103	1164.5	-1.85187	1353	1319.82	0.902171	1224	1165.61	1.66901
7.10372	1238	1249.52	-0.327362	1167	1103.39	1.86198	1276	1253.17	0.639167	1114	1104.16	0.294662
7.23576	1177	1186.79	-0.285227	1003	1045.73	-1.34913	1202	1190.11	0.343002	1026	1046.2	-0.630766
7.3678	1097	1127.18	-0.911284	1006	991.082	0.470346	1116	1130.2	-0.425218	1047	991.291	1.72167
7.49984	1084	1070.66	0.405117	939	939.403	-0.0131619	1044	1073.41	-0.910214	955	939.372	0.5057
7.63187	979	1017.06	-1.2164	877	890.526	-0.456738	963	1019.56	-1.82253	970	890.279	2.55968
7.76391	981	966.223	0.471806	835	844.293	-0.321599	1037	968.49	2.12746	849	843.853	0.176648
7.89595	974	918.004	1.79423	792	800.557	-0.30406	915	920.062	-0.167351	797	799.943	-0.104263
8.02799	848	872.265	-0.833279	800	759.179	1.44324	812	874.132	-2.18041	700	758.41	-2.20769
8.16003	822	828.877	-0.239855	720	720.028	-0.00103042	863	830.568	1.10398	702	719.119	-0.646116
8.29207	749	787.714	-1.41459	688	682.98	0.191405	784	789.246	-0.187347	632	681.946	-1.98674
8.42411	696	748.661	-1.9961	634	647.918	-0.552756	714	750.046	-1.34898	662	646.772	0.591847
8.55615	696	711.606	-0.591533	603	614.733	-0.477811	719	712.857	0.229109	598	613.487	-0.633308
8.68819	713	676.444	1.36903	545	583.321	-1.6415	709	677.572	1.18029	572	581.985	-0.417503
8.82023	623	643.077	-0.804367	564	553.585	0.438565	629	644.093	-0.6018	561	552.168	0.372876
8.95227	613	611.41	0.0642058	536	525.431	0.456515	587	612.324	-1.04523	513	523.943	-0.483134
9.08431	605	581.355	0.961289	505	498.773	0.277091	606	582.175	0.967827	504	497.221	0.301964
9.21635	548	552.828	-0.206242	499	473.529	1.14023	576	553.562	0.934929	484	471.92	0.549094
9.34839	585	525.749	2.44975	467	449.622	0.80417	562	526.404	1.50154	467	447.962	0.88099
9.48043	513	500.042	0.572124	450	426.978	1.08529	513	500.625	0.546359	441	425.272	0.748933
9.61246	509	475.636	1.47883	451	405.528	2.14121	480	476.154	0.175537	434	403.783	1.45048
9.7445	446	452.464	-0.306083	338	385.207	-2.56772	438	452.923	-0.713023	406	383.427	1.12028
9.87654	451	430.462	0.967108	380	365.954	0.720547	454	430.866	1.08574	375	364.143	0.560637
10.0086	398	409.569	-0.57988	344	347.711	-0.200074	434	409.923	1.15573	310	345.873	-2.03747
10.1406	345	389.727	-2.40803	352	330.423	1.15007	361	390.036	-1.52824	309	328.562	-1.11285
10.2727	389	370.883	0.918566	292	314.038	-1.28967	371	371.152	-0.0078681	307	312.157	-0.294344
10.4047	364	352.985	0.577349	278	298.508	-1.22997	326	353.216	-1.50738	317	296.61	1.14521
10.5367	346	335.984	0.538463	305	283.786	1.21471	365	336.182	1.5084	230	281.874	-3.42049
10.6688	352	319.834	1.71445	264	269.829	-0.358758	323	320.002	0.166816	274	267.906	0.368161
10.8008	292	304.491	-0.731011	248	256.596	-0.545853	308	304.632	0.191893	241	254.664	-0.88015
10.9329	267	289.915	-1.40236	246	244.048	0.124449	299	290.031	0.518667	250	242.109	0.499099
11.0649	262	276.065	-0.868916	216	232.148	-1.09876	295	276.16	1.09692	248	230.204	1.13006
11.1969	256	263.023	-0.43894	234	220.98	0.851118	249	263.101	-0.893598	222	219.035	0.199002
11.329	283	250.51	1.93132	210	210.269	-0.0185352	237	250.571	-0.88153	220	208.322	0.78736
11.461	228	238.618	-0.703223	208	200.107	0.547269	242	238.665	0.21441	214	198.16	1.08279
11.5931	237	227.316	0.629034	169	190.467	-1.6513	239	227.35	0.7536	196	188.522	0.534181
11.7251	222	216.573	0.364215	171	181.32	-0.789193	238	216.596	1.38741	186	179.378	0.485573
11.8571	194	206.362	-0.887502	182	172.641	0.693771	211	206.375	0.318383	179	170.702	0.620182
11.9892	203	196.654	0.445425	169	164.404	0.35357	177	196.66	-1.47774	161	162.471	-0.115953
12.1212	188	187.424	0.0419849	163	156.586	0.502385	208	187.425	1.42662	147	154.661	-0.631824
12.2533	196	178.649	1.23934	150	149.166	0.0681319	165	178.646	-1.06231	156	147.248	0.700726
12.3853	162	170.305	-0.652538	128	142.121	-1.24817	158	170.299	-0.978453	145	140.213	0.397558
12.5173	140	162.371	-1.89071	131	135.434	-0.387386	177	162.363	1.10018	132	133.535	-0.133614
12.6494	120	154.826	-3.17914	152	129.084	1.85872	155	154.817	0.0146829	112	127.196	-1.43591
12.7814	163	147.649	1.20234	123	123.055	-0.00492825	153	147.642	0.433188	137	121.178	1.35172
12.9134	151	140.824	0.828108	115	117.329	-0.217151	139	140.818	-0.154209	130	115.465	1.2748
13.0455	135	134.332	0.0575237	117	111.89	0.472381	121	134.328	-1.21168	129	110.04	1.66933
13.1775	130	128.156	0.161764	118	106.725	1.03796	104	128.156	-2.36872	103	104.888	-0.186077
13.3096	115	122.28	-0.678875	109	101.818	0.687914	138	122.285	1.33771	115	99.9962	1.39911
13.4416	127	116.69	0.914852	112	97.1562	1.4026	109	116.701	-0.73762	107	95.3497	1.12628
13.5736	122	111.371	0.962267	89	92.727	-0.395066	109	111.388	-0.22878	86	90.9363	-0.532298
13.7057	113	106.31	0.629303	83	88.5184	-0.605721	148	106.335	3.42488	83	86.744	-0.410961
13.8377	107	101.494	0.532256	92	84.5189	0.77996	96	101.526	-0.564009	99	82.7614	1.63204
13.9698	110	96.9109	1.248	80	80.7178	-0.0802546	92	96.9511	-0.516187	73	78.9776	-0.699631
14.1018	87	92.5487	-0.594879	67	77.105	-1.23452	98	92.5978	0.545705	72	75.3825	-0.398638
14.2338	102	88.3966	1.34694	75	73.6708	0.153486	86	88.4553	-0.264757	70	71.9665	-0.235037
14.3659	91	84.4443	0.68722	66	70.406	-0.542345	94	84.513	0.978509	54	68.7202	-2.00317
14.4979	84	80.682	0.362025	55	67.3021	-1.65882	94	80.7612	1.36548	75	65.6351	1.08137
14.63	85	77.1001	0.856859	61	64.3508	-0.429031	74	77.1903	-0.370864	61	62.7029	-0.218033
14.762	76	73.6899	0.264982	62	61.5444	0.057856	88	73.7915	1.51464	42	59.9158	-2.76448
14.894	65	70.4429	-0.67511	53	58.8756	-0.807073	79	70.5562	0.950004	58	57.2666	0.0963044
15.0261	87	67.351	2.10659	42	56.3373	-2.21229	66	67.4764	-0.181734	57	54.7481	0.298277
15.1581	78	64.5271	1.52551	64	54.0424	1.2447	69	64.6666	0.521676	47	52.4754	-0.798672
15.2902	63	61.7167	0.161685	60	51.739	1.06648	65	61.8688	0.388379	49	50.192	-0.170281
15.4222	78	59.04	2.1468	42	49.5479	-1.16466	50	59.205	-1.30178	69	48.0208	2.5256
15.5542	56	56.4906	-0.0655582	33	47.4632	-2.51773	63	56.6687	0.797668	67	45.9563	2.57089
15.6863	55	54.0622	0.126452	44	45.4798	-0.223085	67	54.2537	1.55721	42	43.9931	-0.307547
15.8183	56	51.7489	0.568071	51	43.5924	1.03727	43	51.954	-1.36547	46	42.1261	0.571173
15.9504	43	49.5452	-0.998133	56	41.7964	1.89804	42	49.764	-1.198	30	40.3505	-1.88973
16.0824	49	47.4456	0.222051	46	40.0871	0.871808	40	47.6783	-1.21405	32	38.6616	-1.17761
16.2144	33	45.4452	-2.16643	28	38.4603	-1.9768	44	45.6919	-0.255064	27	37.0551	-1.9351
16.3465	51	43.5391	1.04473	46	36.9117	1.34	43	43.8	-0.121992	31	35.5269	-0.813061
16.4785	55	41.7228	1.7903	23	35.4376	-2.59342	41	41.9979	-0.155839	36	34.0732	0.321138
16.6106	38	39.9919	-0.323123	32	34.0342	-0.359607	46	40.2813	0.843181	31	32.6901	-0.303553
16.7426	37	38.3422	-0.220662	33	32.6981	0.0525492	29	38.646	-1.79122	37	31.3742	0.924873
16.8746	40	36.77	0.510711	36	31.4259	0.762345	35	37.0882	-0.352969	25	30.1222	-1.02443
17.0067	41	35.5249	0.855072	18	30.466	-2.93826	43	35.8611	1.08867	34	29.1871	0.825413
17.1387	41	34.3224	1.04286	26	29.5357	-0.693408	36	34.6762	0.220632	28	28.2808	-0.053059
17.2707	31	33.053	-0.368737	29	28.5269	0.0878437	31	33.4223	-0.435063	39	27.2931	1.8746
17.4028	36	31.77	0.705008	26	27.5397	-0.301967	38	32.2011	0.940699	33	26.3327	1.16062
17.5348	48	30.695	2.49776	34	26.6568	1.25935	27	31.0952	-0.78812	17	25.4647	-2.05298
17.6669	27	29.4752	-0.476351	34	25.6658	1.4293	25	29.8889	-0.977776	27	24.4918	0.482708
17.7989	32	28.3124	0.651888	20	24.7222	-1.05591	25	28.7396	-0.747918	27	23.5662	0.660842
17.9309	21	27.2038	-1.35378	27	23.8235	0.61131	26	27.6446	-0.322526	26	22.6855	0.650032
18.063	33	26.1469	1.19297	17	22.9677	-1.44738	30	26.6012	0.620533	10	21.8475	-3.7465
18.195	20	25.2583	-1.1758	18	22.2707	-1.0066	25	25.7278	-0.145555	26	21.1704	0.947166
18.3271	22	24.4557	-0.523559	17	21.6967	-1.13911	26	24.9883	0.198418	21	20.6242	0.0820178
18.4591	19	23.5983	-1.05491	32	20.9685	1.95012	23	24.0974	-0.228822	26	19.907	1.19494
18.5911	22	22.7067	-0.150666	27	20.2452	1.29996	28	23.2188	0.903571	18	19.2004	-0.282932
18.7232	25	22.0948	0.581047	20	19.7925	0.0464053	18	22.623	-1.08966	19	18.7687	0.0530661
18.8552	27	21.3932	1.07903	23	19.2438	0.783218	24	21.9357	0.42137	19	18.2384	0.174731
18.9873	28	20.6016	1.39816	29	18.5994	1.93135	17	21.1565	-1.0081	12	17.6096	-1.61935
19.1193	25	20.0864	0.982717	12	18.2232	-1.79648	11	20.6569	-2.91168	20	17.2535	0.614147
19.2513	25	19.354	1.1292	20	17.6253	0.531009	20	19.9365	0.0142113	18	16.6705	0.313361
19.3834	19	18.6556	0.079003	21	17.0559	0.860677	17	19.25	-0.545695	19	16.116	0.661628
19.5154	21	17.9897	0.6569	21	16.5136	0.979003	23	18.5958	0.918331	12	15.5886	-1.03593
19.6475	19	17.3547	0.377466	17	15.9972	0.243211	13	17.9725	-1.37913	35	15.0868	3.36595
19.7795	14	16.7945	-0.746861	14	15.5964	-0.426646	17	17.4721	-0.114513	10	14.7085	-1.48897
19.9115	17	16.288	0.172694	20	15.1521	1.08402	16	16.9306	-0.232662	17	14.2726	0.661483
20.0436	19	15.85	0.722667	15	14.8174	0.0471584	14	16.5056	-0.669657	18	13.954	0.953643
20.1756	20	15.3123	1.0482	12	14.3794	-0.686858	25	15.979	1.80419	22	13.5296	1.8059
20.3077	16	14.9199	0.270016	15	14.0816	0.237127	16	15.5993	0.10017	9	13.2476	-1.41585
20.4397	20	14.4245	1.24673	11	13.6775	-0.807297	16	15.1145	0.221361	10	12.8565	-0.903293
20.5717	14	14.0723	-0.0193306	15	13.4121	0.410003	19	14.7747	0.969346	12	12.6062	-0.17499
20.7038	16	13.7343	0.566419	13	13.1568	-0.0434891	12	14.4487	-0.706886	15	12.3656	0.680188
20.8358	11	13.292	-0.691078	11	12.7946	-0.541091	12	14.0165	-0.582125	16	12.0156	0.996111
20.9678	11	13.0335	-0.613129	15	12.6574	0.604851	14	13.8178	0.0487023	14	11.9007	0.561065
21.0999	8	12.6961	-1.66031	20	12.3467	1.71133	14	13.4435	0.148723	13	11.5956	0.389516
21.2319	17	12.4194	1.11097	11	12.1392	-0.343491	12	13.178	-0.340061	8	11.4016	-1.20265
21.364	12	12.0356	-0.0102828	13	11.8226	0.32654	19	12.8035	1.42157	10	11.0959	-0.346564
21.496	19	11.6697	1.68169	9	11.5213	-0.840423	10	12.4467	-0.773728	16	10.8053	1.29866
21.628	14	11.3208	0.716055	12	11.2344	0.221022	15	12.1069	0.747007	7	10.5291	-1.33387
21.7601	11	11.1058	-0.0319041	14	11.0779	0.780964	13	11.9025	0.304397	6	10.3853	-1.79029
21.8921	10	10.7822	-0.247355	16	10.8112	1.29719	8	11.5876	-1.26839	11	10.1288	0.262686
22.0242	12	10.5953	0.405492	10	10.6782	-0.214464	16	11.411	1.14725	12	10.0081	0.575022
22.1562	13	10.2946	0.750352	15	10.4297	1.18005	10	11.1185	-0.353711	7	9.76917	-1.04665
22.2882	13	10.0078	0.829896	11	10.1931	0.243285	12	10.8399	0.334882	16	9.54209	1.61448
22.4203	13	9.856	0.871988	10	10.0888	-0.0280703	11	10.698	0.091059	10	9.44942	0.174108
22.5523	16	9.58871	1.60282	15	9.86756	1.32519	9	10.4385	-0.479507	12	9.23719	0.797555
22.6844	6	9.4971	-1.42769	5	9.86476	-2.17559	15	10.4044	1.18658	9	9.25356	-0.0845203
22.8164	5	9.43668	-1.98414	8	9.79881	-0.635974	20	10.3065	2.16752	14	9.1923	1.28491
22.9484	15	9.30695	1.46994	10	9.7082	0.0922742	16	10.1856	1.4536	7	9.11192	-0.798232
23.0805	13	9.18124	1.05913	8	9.61975	-0.572668	10	10.0684	-0.0216259	12	9.03334	0.856401
23.2125	9	9.06202	-0.0206718	10	9.53616	0.14668	16	9.95748	1.51063	15	8.95936	1.55969
23.3446	14	8.94769	1.35029	6	9.45584	-1.41084	15	9.85125	1.3294	7	8.88836	-0.713734
23.4766	8	9.00265	-0.354489	11	9.5878	0.425794	9	9.96388	-0.321294	6	9.03975	-1.24097
23.6086	8	9.00772	-0.356284	9	9.62236	-0.207455	17	9.97809	1.70306	10	9.08502	0.289342
23.7407	10	8.89087	0.350738	9	9.53428	-0.178095	7	9.86835	-1.08413	7	9.00491	-0.757786
23.8727	3	8.73357	-3.31028	7	9.35895	-0.8916	9	9.66986	-0.223286	6	8.82921	-1.15502
24.0048	8	8.6291	-0.22242	11	9.28099	0.5183	11	9.57222	0.430492	13	8.7589	1.17627
24.1368	6	8.40997	-0.983868	11	9.08827	0.576407	7	9.3581	-0.891276	7	8.5714	-0.593932
24.2688	9	8.32184	0.226053	13	9.02483	1.10251	10	9.27664	0.228746	6	8.51546	-1.02693
24.4009	11	8.11696	0.869269	9	8.84451	0.051829	2	9.07657	-5.00389	6	8.34014	-0.955359
24.5329	9	8.04109	0.319638	19	8.79147	2.342	6	9.00714	-1.22766	13	8.29434	1.30511
24.665	4	7.96961	-1.9848	8	8.74187	-0.262292	5	8.94197	-1.7629	8	8.25181	-0.0890286
24.797	11	7.78061	0.970682	13	8.57474	1.22735	9	8.7574	0.0808655	8	8.08924	-0.0315494
24.929	13	7.76666	1.45147	5	8.62667	-1.62189	11	8.79769	0.664023	9	8.15615	0.281284
25.0611	6	7.66023	-0.677785	10	8.49382	0.476297	8	8.64896	-0.229443	6	8.02165	-0.825335
25.1931	3	7.48517	-2.58951	10	8.33823	0.525499	12	8.47797	1.01672	9	7.87019	0.376603
25.3251	10	7.31864	0.84792	3	8.19066	-2.99683	13	8.31549	1.29925	6	7.72677	-0.70495
25.4572	5	7.16022	-0.966078	12	8.0507	1.14007	9	8.16108	0.279639	7	7.59094	-0.223353
25.5892	8	7.00949	0.350197	7	7.91793	-0.346943	5	8.01434	-1.34806	11	7.46228	1.06666
25.7213	8	6.98649	0.35833	9	7.91141	0.362862	5	7.99698	-1.34029	7	7.46215	-0.174675
25.8533	6	6.84363	-0.344413	5	7.78517	-1.24556	11	7.85788	0.947385	9	7.33974	0.55342
25.9853	10	6.70773	1.04111	13	7.66542	1.47955	7	7.72569	-0.274285	5	7.22381	-0.994518
26.1174	12	6.57843	1.56507	9	7.55182	0.482727	13	7.60006	1.49767	14	7.114	1.84036
26.2494	7	6.5745	0.160826	8	7.56211	0.154817	18	7.60142	2.45097	11	7.13028	1.16676
26.3815	3	6.4511	-1.99249	10	7.4532	0.80537	3	7.48146	-2.58737	9	7.02486	0.658379
26.5135	7	6.45412	0.206323	4	7.46934	-1.73467	12	7.48957	1.30205	6	7.04675	-0.427334
26.6455	9	6.45514	0.848287	11	7.48267	1.06052	5	7.49546	-1.116	16	7.06553	2.23362
26.7776	6	6.50106	-0.204558	7	7.5858	-0.221412	12	7.5942	1.27185	12	7.18201	1.39083
26.9096	7	6.45299	0.206751	9	7.503	0.499	3	7.50245	-2.59949	13	7.09598	1.63748
27.0417	5	6.45263	-0.649637	9	7.51305	0.495651	11	7.50645	1.05335	4	7.11081	-1.55541
27.1737	6	6.33276	-0.135848	9	7.40404	0.531987	7	7.3891	-0.147065	11	7.00416	1.20479
27.3057	3	6.21883	-1.85839	6	7.30078	-0.531041	8	7.27769	0.255374	10	6.90327	0.979271
27.4378	4	6.15601	-1.07801	7	7.29399	-0.111119	9	7.26551	0.578163	9	6.90701	0.697662
27.5698	10	6.36237	1.15032	15	7.46179	1.94636	9	7.43119	0.522938	10	7.07569	0.924747
27.7019	7	6.2457	0.285097	10	7.35415	0.836692	7	7.31656	-0.119648	3	6.96981	-2.29197
27.8339	7	6.25269	0.282457	10	7.36896	0.832008	4	7.32724	-1.66362	7	6.98863	0.00429879
27.9659	9	6.14116	0.952947	7	7.26591	-0.100505	12	7.21762	1.38055	8	6.88722	0.393429
28.098	5	6.03523	-0.462969	9	7.16837	0.610543	8	7.11362	0.313383	6	6.79136	-0.323072
28.23	8	6.05242	0.688574	7	7.19274	-0.0728481	9	7.13438	0.621873	6	6.81964	-0.334618
28.3621	15	5.95059	2.33655	9	7.09874	0.633753	9	7.03434	0.655221	3	6.72718	-2.15189
28.4941	6	5.85387	0.0596568	11	7.00977	1.2031	10	6.93942	0.967842	10	6.63979	1.06259
28.6261	4	5.92788	-0.963939	9	7.13603	0.621324	6	7.06505	-0.434804	6	6.77808	-0.317649
28.7582	4	5.90529	-0.952647	9	7.07388	0.64204	9	6.99759	0.66747	11	6.71135	1.29308
28.8902	6	5.81017	0.0774973	9	6.98554	0.671488	3	6.90398	-2.25396	3	6.62424	-2.09246
29.0222	5	5.71985	-0.321928	6	6.90194	-0.368216	11	6.81518	1.26177	5	6.54192	-0.68957
29.1543	4	5.75582	-0.87791	10	6.94368	0.966494	11	6.8544	1.24994	11	6.5873	1.33048
29.2863	8	5.78701	0.78241	10	6.98006	0.954989	12	6.88864	1.47552	6	6.62704	-0.255989
29.4184	11	5.69722	1.59885	9	6.89611	0.701296	7	6.8001	0.0755557	11	6.54404	1.34352
29.5504	6	5.612	0.158402	2	6.8167	-3.40592	3	6.71613	-2.14551	6	6.46562	-0.190089
29.6824	4	5.53109	-0.765545	9	6.74158	0.752807	9	6.6365	0.787834	8	6.39153	0.56868
29.8145	5	5.62015	-0.277338	7	6.88098	0.0449835	5	6.77666	-0.794548	6	6.54243	-0.221445
29.9465	6	5.61189	0.158443	6	6.83131	-0.339382	7	6.72303	0.104686	11	6.48764	1.36053
30.0786	14	5.77125	2.19923	7	6.99373	0.00236909	5	6.88679	-0.843797	9	6.65534	0.781553
30.2106	7	5.80023	0.45347	12	7.02598	1.43588	6	6.91817	-0.374842	9	6.69015	0.769949
30.3426	4	5.82883	-0.914415	8	7.05765	0.333169	14	6.94909	1.88443	9	6.7243	0.758566
30.4747	9	6.02295	0.992351	8	7.29929	0.247739	7	7.1953	-0.0738154	3	6.97875	-2.29713
30.6067	6	6.1116	-0.0455618	8	7.34337	0.232155	10	7.23938	0.872986	8	7.0188	0.346906
30.7388	8	6.00284	0.706101	7	7.23733	-0.0897037	8	7.13068	0.307351	8	6.9122	0.384595
30.8708	8	5.89975	0.742549	10	7.13719	0.9053	7	7.02773	-0.0104808	10	6.81164	1.00825
31.0028	5	5.92243	-0.412524	6	7.16205	-0.474405	7	7.05233	-0.0197773	8	6.8385	0.410653
31.1349	5	5.82339	-0.368229	5	7.06596	-0.923927	10	6.95341	0.963415	4	6.74203	-1.37101
31.2669	5	5.72949	-0.326239	8	6.9752	0.36232	7	6.85973	0.0530186	4	6.65101	-1.3255
31.399	2	5.64048	-2.57421	7	6.88947	0.0417773	5	6.77098	-0.792006	7	6.56512	0.164368
31.531	4	5.60155	-0.800773	6	6.89951	-0.367223	6	6.78049	-0.318635	8	6.58325	0.500897
31.663	10	5.5926	1.39374	11	6.8473	1.25208	5	6.72539	-0.771619	7	6.52509	0.179498
31.7951	3	5.63095	-1.51898	7	6.88794	0.0423544	10	6.76571	1.02277	7	6.56792	0.163312
31.9271	7	5.54675	0.549275	8	6.80675	0.421879	10	6.68168	1.04935	11	6.48649	1.36087
32.0592	8	5.46694	0.895573	11	6.73004	1.28744	6	6.60208	-0.245797	5	6.40966	-0.630418
32.1912	11	5.39126	1.6911	10	6.65758	1.05696	7	6.52667	0.178902	10	6.33714	1.1583
32.3232	3	5.31952	-1.33918	7	6.58912	0.155298	5	6.45523	-0.650797	4	6.2687	-1.13435
32.4553	8	5.29695	0.955673	11	6.61546	1.32199	8	6.48112	0.537004	4	6.30327	-1.15163
